# Supplementary material for: Precise optical control of gene expression in C elegans using improved genetic code expansion and Cre recombinase
Source: eLife. 2021 Aug 5;10:e67075. doi: 10.7554/eLife.67075 (PMC8448529; doi:10.7554/eLife.67075)
Supplement: Figure 2—figure supplement 1—source data 1. — Nuclear cytoplasmic ratios for lines shown in Supplementary file 1B. [file elife-67075-fig2-figsupp1-data1.xlsx]

## Sheet: Fig 2 - suppl 1A
			Signal		HA/GFP				values used for Figure
exp1	SGR35	GFP::mCherry (HA)	541		0.00204924		SGR35	0.00193877	0.193877
	SGR36	GFP::mCherry (HA)	168		0.000342857		SGR36	0.000180388	0.0180388
	SGR37	GFP::mCherry (HA)	4450		0.0167293		SGR37	0.0190232	1.90232
	SGR38	GFP::mCherry (HA)	3280		0.00893733		SGR38	0.00950565	0.950565
	SGR39	GFP::mCherry (HA)	300		0.000647948		SGR39	0.000323974	0.0323974
	SGR45	GFP::mCherry (HA)	14400		0.0549618		SGR45	0.0558391	5.58391
	SGR46	GFP::mCherry (HA)	15200		0.0730769		SGR46	0.0803044	8.03044
	SGR35	GFP	264000
	SGR36	GFP	490000
	SGR37	GFP	266000
	SGR38	GFP	367000
	SGR39	GFP	463000
	SGR45	GFP	262000
	SGR46	GFP	208000
exp2	SGR35	GFP::mCherry (HA)	1150		0.0018283
	SGR36	GFP::mCherry (HA)	4.39		1.79184e-05
	SGR37	GFP::mCherry (HA)	12300		0.0213172
	SGR38	GFP::mCherry (HA)	6810		0.010074
	SGR39	GFP::mCherry (HA)	0		0
	SGR45	GFP::mCherry (HA)	22800		0.0567164
	SGR46	GFP::mCherry (HA)	34400		0.0875318
	SGR35	GFP	629000
	SGR36	GFP	245000
	SGR37	GFP	577000
	SGR38	GFP	676000
	SGR39	GFP	272000
	SGR45	GFP	402000
	SGR46	GFP	393000

## Sheet: Fig 2 - suppl 1B
SGR30	SGR31	SGR98	SGR32	SGR99	SGR33	SGR100	SGR34	SGR101		each value denotes the N/C ration in one cell
no NES	p120cts (1)	p120cts (2)	PKIa (1)	PKIa (2)	Smad4 (1)	Smad4 (2)	S-NES (1)	S-NES (2)		each block ae cells from one individual
7.87868	0.669671	0.882678	1.33838	1.27573	1.53882	0.898229	0.953259	0.889846
8.57623	0.711955	0.81396	1.15873	1.3229	1.60598	1.3127	0.4808	0.983935
9.08947	0.736579	0.511979	1.01328	1.13633	1.75621	1.38116	0.709589	0.842728
9.69571	0.679635	0.976261	1.06237	1.49763	1.45428	1.05425	0.789369
6.70437	0.710725	0.734177		1.34684	1.585			1.07259
4.97503	0.598573	0.750392	0.723951	1.48067		1.09129	0.882019	1.12278
	0.678799		0.742276	1.05525	2.84094	0.934093	1.03961	0.843007
8.53143		0.739971	0.752233		3.15893	0.820871	0.752473	0.997077
9.67414	0.659581	0.71913	0.783852	1.0636	3.11208	0.603562		1.01375
8.17779	0.724782	0.59263	0.801226	1.2589	2.50687	0.713931	0.712891
9.49555	0.627403	0.632719	0.919866	1.24021	1.91368		0.975616	1.49054
4.53892	0.596424	0.702646				0.962843	0.697891	1.02403
8.17133	0.758542	0.775946	1.03471	1.21855	1.50092	0.752473	0.656995	1.09145
	0.634789	0.729584	0.828541	1.3323	1.67502	0.705337	0.809651	0.972358
9.37912		0.828967	1.03787		2.61036	0.853055	0.72544
7.97829	0.785244				1.59841		0.711344	1.25142
6.5614	0.604847	0.729008	1.93891			1.41239		1.20893
5.52256	0.642155	0.873559	1.94438		1.96847	1.09617	0.693836	1.18796
7.09919	0.66912	0.800965	1.59089		1.76823	0.76522	0.863565	1.11094
8.33568	0.833247	0.813134	1.65266		2.07862	0.68249	0.894792	1.25261
		0.706754	1.7895		1.89524		0.981455
5.68063	0.636898	0.810644	2.17096		1.48838		0.594804
7.22029	0.616645	0.797365	1.52614		1.42024
7.53934	0.668346	0.710884	1.86963
7.62974	0.577607	0.914553
7.46684	0.598126	0.646588
6.15737
	0.739984
	0.730587
	0.725199
	0.699813
	0.862777
	0.66827
	0.640003
	0.694731
	0.693506
	0.757673
	0.705095
