# Supplementary material for: Precise optical control of gene expression in C elegans using improved genetic code expansion and Cre recombinase
Source: eLife. 2021 Aug 5;10:e67075. doi: 10.7554/eLife.67075 (PMC8448529; doi:10.7554/eLife.67075)
Supplement: Figure 2—source data 1. [file elife-67075-fig2-data1.xlsx]

## Sheet: Sheet1
		GFP::mCherry exp 1	GFP::mCherry exp 2	GFP::mCherry exp 3		GFP exp 1	GFP exp 2	GFP exp 3		GFP::mCherry/GFP exp 1	GFP::mCherry/GFP exp 2	GFP::mCherry/GFP exp 3		average			average both lines	average %
SGR35-1mM			447			416000	436000	446000			0.00102523			0.00102523			0.000794012	0.079
SGR35-0.1mM			588	80.4		502000	438000	525000			0.00134247	0.000153143		0.000747804			0.000472631	0.047
SGR35-0.01mM			432	59.5		511000	458000	548000			0.000943231	0.000108577		0.000525904			0.00029435	0.029
SGR35-0.001mM						633000	578000	935000
SGR35-0mM						385000	459000	606000
SGR46-1mM		10700	14400	17700		414000	375000	613000		0.0258454	0.0384	0.0288744		0.0310399			0.0455716	4.557
SGR46-0.1mM		7190	8500	15700		232000	462000	516000		0.0309914	0.0183983	0.0304264		0.0266053			0.0319746	3.197
SGR46-0.01mM		0	1180	858		199000	403000	258000			0.00292804	0.00332558		0.00312681			0.00309334	0.309
SGR46-0.001mM						227000	421000	205000
SGR46-0mM						547000	421000	295000
SGR45-1mM		9160	25200	15100		249000	451000	459000		0.0367871	0.0558758	0.0328976		0.0418535			0.0441075	4.411
SGR45-0.1mM		13300	31600	16300		573000	745000	609000		0.0232112	0.0424161	0.0267652		0.0307975			0.0289819	2.898
SGR45-0.01mM		208	2330	1270		573000	763000	596000		0.000363002	0.00305374	0.00213087		0.0018492			0.0029801	0.298
SGR45-0.001mM						763000	820000	693000
SGR45-0mM						704000	754000	513000
SGR40-1mM			524	75.9		524000	512000	743000			0.00102344	0.000102153		0.000562795
SGR40-0.1mM			219	54.8		530000	644000	999000			0.000340062	5.48549e-05		0.000197458
SGR40-0.01mM			82.3	20.8		236000	976000	504000			8.43238e-05	4.12698e-05		6.27968e-05
SGR40-0.001mM						255000	388000	266000
SGR40-0mM						258000	416000	560000
SGR48-1mM		15100	20900	21900		274000	269000	461000		0.0551095	0.0776952	0.0475054		0.0601034
SGR48-0.1mM		6490	11900	12800		160000	294000	413000		0.0405625	0.0404762	0.0309927		0.0373438
SGR48-0.01mM		194	786	1390		184000	215000	311000		0.00105435	0.00365581	0.00446945		0.00305987
SGR48-0.001mM						528000	662000	768000
SGR48-0mM						334000	376000	443000
SGR47-1mM		9230	15200	12200		204000	274000	318000		0.0452451	0.0554745	0.0383648		0.0463614
SGR47-0.1mM		4270	6880	7030		227000	233000	212000		0.0188106	0.0295279	0.0331604		0.0271663
SGR47-0.01mM		529	2840	2470		423000	552000	416000		0.00125059	0.00514493	0.0059375		0.00411101
SGR47-0.001mM						272000	487000	506000
SGR47-0mM						374000	399000	496000
missing values: intensity was below detection threshold.
