# Supplementary material for: Precise optical control of gene expression in C elegans using improved genetic code expansion and Cre recombinase
Source: eLife. 2021 Aug 5;10:e67075. doi: 10.7554/eLife.67075 (PMC8448529; doi:10.7554/eLife.67075)
Supplement: Figure 3—source data 1. [file elife-67075-fig3-data1.xlsx]

## Sheet: Figure 3E
line	conc	exp1	exp2	exp3
SGR49	0 mM	0	0	1
SGR50	0 mM	0	0	0
SGR49	1 mM	0.5	0.5	1.5
SGR50	1 mM	0	0.5	0
SGR51	0 mM	0	0	0
SGR52	0 mM	0	0	0
SGR51	1 mM	23.5	14.5	20.5
SGR52	1 mM	18.5	16	20.5
SGR53	0 mM	0	0	0
SGR54	0 mM	0	0	0
SGR53	1 mM	30	29	29
SGR54	1 mM	28	30	30
values are the average of counts carried out by two people; in each experiment 30 animals were scored for each condition

## Sheet: Figure 3G
line		exp1	exp2
SGR53	+ATR	0.838095	0.503704		NES::PCKRS & optPC-Cre
SGR54	+ATR	0.833333	0.858586		NES::PCKRS & optPC-Cre
SGR53	-ATR	0.116667	0.0909091		NES::PCKRS & optPC-Cre
SGR54	-ATR	0	0.1		NES::PCKRS & optPC-Cre
SGR51	+ATR	0.421212	0.411111		NES::PCKRS & PC-Cre
SGR52	+ATR	0.244444	0.206349		NES::PCKRS & PC-Cre
SGR51	-ATR	0.0740741	0.0666667		NES::PCKRS & PC-Cre
SGR52	-ATR	0.0833333	0.186508		NES::PCKRS & PC-Cre
SGR49	+ATR	0	0		PCKRS & PC-Cre
SGR50	+ATR	0.0476191	0		PCKRS & PC-Cre
SGR49	-ATR	0.103704	0.0555556		PCKRS & PC-Cre
SGR50	-ATR	0.138889	0.118687		PCKRS & PC-Cre
values are fraction of animals responding. In each experiment each condition was stimulated and 3 times.
