# Supplementary material for: Precise optical control of gene expression in C elegans using improved genetic code expansion and Cre recombinase
Source: eLife. 2021 Aug 5;10:e67075. doi: 10.7554/eLife.67075 (PMC8448529; doi:10.7554/eLife.67075)
Supplement: Figure 4—figure supplement 1—source data 1. [file elife-67075-fig4-figsupp1-data1.xlsx]

## Sheet: Fig 4 - suppl 1C
	optPC-Cre -PCK	optPC-Cre +PCK	mec-4(d)	mec-4p::gfp	N2
assay 1	8.4	8.6	2.4	8.4	8.7
assay 2	8.6	8.2	2.7	7	8.6
assay 3	8	6.66667	1.44444	5.77778	8.77778
assay 3		8.11111						the optPC-Cre +PCK condition was scored twice from animals grown on independent plates, but on the same day together with the other conditions of assay 3
values shown are the mean number of responses for 10 animals

## Sheet: Fig 4 - suppl 1D
	optPC-Cre - PCK	optPC-Cre +PCK	optPC-Cre +PCK +UV	mec-4(d)	mec-4p::GFP	N2
assay 1	6.4	6.5	7.1	2.8	7.44444	8.33333
assay 2	7.11111	6.77778	7.11111	1.66667	6.77778	6.9
asssay 3	6.2	7	6.66667	2.5	6.1	8.4
values shown are the mean number of responses for 10 animals
