# Supplementary material for: Precise optical control of gene expression in C elegans using improved genetic code expansion and Cre recombinase
Source: eLife. 2021 Aug 5;10:e67075. doi: 10.7554/eLife.67075 (PMC8448529; doi:10.7554/eLife.67075)
Supplement: Figure 5—figure supplement 3—source data 1. [file elife-67075-fig5-figsupp3-data1.xlsx]

## Sheet: Fig 5 - suppl 3
PLML	PLMR
6899.78	8683.08
10503.7	11247.9
5185.83	8545.4
5112.48	8089.59
7403.28	5284.63
5485.22	4517.54
10997.2	6950.47
	5300.32
	9467.31
