# Supplementary material for: Precise optical control of gene expression in C elegans using improved genetic code expansion and Cre recombinase
Source: eLife journal article supplement (doi:10.7554/elife.67075), 2021-08-05
Supplement: supp [file 0PLM+ATR_1s_Raw.xlsx]

## Sheet: Sheet1
Time(s)	T1	T2	T3	T4	T5	T6	T1	T2	T3	T4	T5	T1	T2	T3	T4	T5
0	0	0	0	0			0	0	0	0	0	0	0	0	0	0
0.133	-130.217	82.568	82.461	84.007			51.312	122.802	-25.421	159.05	-4.246	-54.08	64.947	13.076	-3.385	82.956
0.267	-49.223	145.313	18.37	135.253			-2.287	87.948	8.385	90.289	15.286	9.274	82.553	-28.454	-11.268	81.411
0.4	-7.213	116.313	52.278	30.587			-19.548	105.352	6.083	149.918	23.854	95.283	99.288	-105.667	17.774	81.862
0.533	6.786	76.323	-75.703	20.155			18.065	89.719	-4.522	142.038	8.002	142.682	131.986	-154.101	-14.494	173.317
0.667	-17.835	142.079	190.919	-50.046			-11.256	86.321	-50.525	89.237	19.296	253.725	200.818	-210.307	23.711	140.341
0.8	4.279	138.765	46.71	-69.98			5.271	113.936	-25.004	94.248	-41.3	285.282	103.875	-259.325	-107.212	161.017
0.933	-5.398	210.173	10.645	-285.303			15.304	99.521	-42.323	99.909	70.779	173.802	115.681	-216.998	-4.135	107.721
1.067	2.508	247.123	20.598	-358.626			42.537	118.546	-5.444	146.35	-0.066	175.947	71.767	-250.58	10.117	161.117
1.2	-7.452	190.539	77.342	-356.426			32.702	95.793	-5.577	130.517	1.124	121.513	50.876	-235.808	16.926	165.205
1.333	-1.229	133.126	159.607	-432.582			36.365	125.719	-25.308	97.998	4.07	102.69	130.101	-290.38	-20.406	181.458
1.467	-24.687	208.869	-39.674	-564.945			10.743	82.276	-13.591	116.417	0.885	82.452	106.473	-225.936	89.821	134.829
1.6	-55.309	207.491	52.248	-537.806			-21.809	65.335	-43.338	87.389	27.182	69.107	64.493	-172.1	-17.814	51.771
1.733	-101.891	193.263	-7.926	-301.441			4.284	71.689	-2.724	171.268	-6.531	107.719	-41.422	-98.177	29.908	121.24
1.867	-99.305	217.546	13.437	-312.073			-13.757	58.143	-33.877	175.779	8.07	52.378	73.093	-75.99	29.806	236.6
2	-135.988	179.325	-32.621	-251.287			6.737	61.523	-38.438	96.672	-4.749	144.416	63.994	61.273	-104.349	145.728
2.133	-110.649	185.203	-27.672	-188.102			-11.32	68.531	18.417	74.722	12.783	119.044	101.839	41.491	-15.674	142.646
2.267	-149.48	177.761	188.277	-144.038			11.632	35.889	-7.891	21.708	-3.675	145.172	67.258	102.268	2.244	141.854
2.4	-198.306	149.289	31.466	-46.718			50.951	77.321	6.931	32.701	0.714	69.799	120.282	141.236	39.605	171.691
2.533	-129.779	147.667	37.792	-27.681			82.482	33.389	-31.414	17.989	4.56	-34.839	104.251	140.2	6.479	146.292
2.667	-107.399	59.594	-26.475	18.346			66.23	79.455	3.004	24.156	9.601	143.874	74.936	138.689	39.034	121.029
2.8	-170.164	-15.437	79.353	93.418			30.94	90.058	-45.844	15.684	4.597	80.37	153.699	83.425	-16.154	140.24
2.933	-140.9	2.401	50.548	256.807			39.465	68.583	-41.091	-6.808	-15.299	85.192	122.147	96.624	8.074	160.632
3.067	-129.368	7.846	27.01	142.25			45.071	167.023	-72.827	7.4	1.118	47.465	74.529	119.137	14.434	146.589
3.2	-128.15	-14.49	56.699	-21.853			0.572	90.146	-63.203	-31.486	-17.518	47.59	106.428	69.374	-4.521	67.02
3.333	-97.674	-16.321	4.625	193.026			-3.825	58.936	-53.04	-18.664	17.178	73.7	82.221	57.46	-5.835	118.991
3.467	-94.906	19.183	50.766	207.752			-14.587	52.476	-50.892	-59.647	-9.742	76.888	110.709	15.653	-7.024	111.71
3.6	-33.795	-2.598	-4.959	255.629			35.036	31.502	-57.663	-34.267	11.424	50.917	145.107	-1.79	-3.139	107.301
3.733	-43.504	-58.053	-19.216	216.737			13.119	71.197	-55.438	47.112	-6.5	15.726	129.602	37.412	-6.159	123.704
3.867	-68.893	-178.269	19.89	70.548			24.698	70.079	-48.781	96.931	20.946	-6.995	135.313	101.554	22.005	102.671
4	-134.146	-245.695	2.406	123.565			-2.021	72.251	7.338	119.829	3.115	21.348	118.801	258.652	1.679	165.047
4.133	-126.461	-113.534	-35.635	135.946			-3.719	59.968	-2.86	230.266	1.031	125.992	128.952	205.463	21.166	130.352
4.267	-109.107	-103.507	92.42	177.139			-3.66	50.273	-16.474	141.7	1.633	131.952	120.784	251.879	-0.623	147.255
4.4	-100.237	-47.773	49.442	142.73			-33.657	53.173	-3.434	118.343	-0.43	33.453	127.832	251.422	15.416	88.616
4.533	-110.89	-16.908	78.954	166.326			9.043	85.937	-13.363	74.073	-17.348	15.225	28.833	214.89	-7.454	76
4.667	-31.171	-32.717	98.898	217.162			2.186	51.939	-4.11	-29.089	2.486	29.466	30.896	183.749	-5.329	144.001
4.8	-12.396	-54.567	-73.09	78.726			-5.375	69.762	4.747	-46.212	6.349	31.219	-3.685	258.494	-0.996	165.165
4.933	103.22	-121.405	205.072	33.578			-34.092	61.12	6.672	-77.471	1.912	23.515	-20.797	213.476	5.258	150.189
5.067	219.692	-98.776	-85.609	23.858			5.544	60.721	5.38	-158.969	-11.248	-11.372	23.637	210.813	-23.583	123.755
5.2	284.577	15.152	190.913	22.082			16.147	47.604	23.357	125.293	-5.34	48.431	8.028	219.053	-10.184	146.153
5.333	99.428	114.728	6.969	12.435			12.293	38.269	11.042	-8.141	1.327	68.492	-20.961	199.895	27.165	142.717
5.467	82.775	51.682	63.941	55.899			7.601	77.272	-0.86	-2.098	6.77	51.088	-7.432	204.64	-6.293	136.885
5.6	21.036	-4.371	22.596	79.124			18.514	61.013	12.734	-45.292	7.902	85.529	3.065	185.643	3.933	152.136
5.733	43.114	47.314	34.14	114.595			8.781	42.452	24.916	7.557	11.783	109.263	61.263	158.106	2.499	127.419
5.867	-3.019	79.816	-21.137	120.983			6.578	25.076	50.341	-159.62	0.86	106.371	5.025	229.167	3.141	179.648
6	-4.128	84.847	-25.158	160.739			6.633	48.122	47.775	-133.885	-29.185	104.662	46.26	192.752	15.449	179.206
6.133	9.558	66.968	39.151	164.42			6.768	12.812	91.571	-214.366	6.753	138.27	191.079	-307.26	-16.584	97.821
6.267	-8.762	60.746	53.107	189.513			5.997	70.363	26.164	-145.342	-42.798	97.274	117.8	-334.847	1.543	-29.857
6.4	21.247	85.721	-8.795	140.701			-8.33	71.06	82.528	-108.768	-89.852	62.451	166.673	-62.111	14.556	233.573
6.533	1.359	48.678	-4.066	109.808			5.633	51.742	171.214	-69.174	-96.453	81.672	72.475	51.316	-4.252	61.697
6.667	7.126	104.215	18.672	90.977			-12.519	-35.99	-34.118	-117.127	-79.177	118.251	25.206	42.603	16.495	113.149
6.8	-2.088	113.318	17.882	72.641			9.565	133.685	40.253	195.991	-62.949	132.264	96.854	97.786	-12.322	98.939
6.933	6.695	141.691	-3.648	61.103			-38.147	96.069	15.917	118.449	-57.756	143.336	15.954	143.08	-17.894	110.17
7.067	-1.018	100.563	2.903	30.257			5.482	-83.913	46.996	149.395	5.772	143.001	121.128	155.703	8.492	166.415
7.2	14.413	264.373	-5.308	-9.411			5.525	-126.6	34.623	142.363	-217.207	78.799	121.035	214.582	-3.201	167.421
7.333	-4.316	58.033	7.011	23.213			23.522	10.5	183.313	64.052	38.907	91.314	17.215	164.068	2.31	180.125
7.467	1.394	107.648	-2.835	25.689			2.748	59.687	7.499	98.445	-74.268	90.425	9.526	116.94	-2.952	140.445
7.6	-24.544	147.148	-5.418	-3.229			7.63	116.823	92.304	28.853	-54.248	89.62	123.291	85.375	4.501	75.897
7.733	14.846	215.71	-4.354	9.44			12.147	139.712	94.119	67.332	-57.361	35.122	123.459	92.418	-8.6	3.175
7.867	-1.805	96.256	-8.048	-71.023			42.057	77.375	16.767	69.738	-20.427	59.389	-122.243	109.685	-22.972	14.226
8	-14.18	71.305	-6.886	-159.361			19.014	115.955	68.941	-6.881	-5.378	52.057	122.903	122.089	16.54	6.309
8.133	-13.825	27.343	15.204	-249.546			136.152	90.493	15.809	6.992	-34.653	45.788	-24.504	107.104	-1.008	-16.478
8.267	-19.619	26.467	11.661	-285.167			31.676	61.373	40.582	32.982	-66.536	76.533	131.698	120.314	-8.133	26.291
8.4	-59.433	53.832	-38.082	-326.534			7.376	97.179	16.611	63.231	-7.773	63.262	73.794	89.891	17.854	-21.062
8.533	-126.627	62.437	36.08	-429.052			-117.066	-50.947	66.981	-44.158	29.008	71.376	77.48	72.6	-2.856	12.42
8.667	-96.961	45.155	-161.631	-323.943			107.946	73.424	115.994	104.659	6.596	52.531	39.942	114.482	-5.783	-10.228
8.8	-135.648	79.687	-17.445	-356.163			19.504	106.845	52.263	-52.137	15.004	21.007	81.222	17.404	-9.899	-2.542
8.933	-145.021	80.283	25.772	-293.194			6.431	95.047	16.025	101.63	12.06	37.878	36.591	168.973	-6.504	6.213
9.067	-145.927	96.568	12.093	-179.746			29.727	107.273	22.422	124.884	9.254	53.891	52.247	91.242	-23.091	-10.688
9.2	-119.871	73.022	144.351	-41.534			24.347	76.785	-52.456	104.417	-3.004	58.929	19.033	174.183	-23.294	-35.915
9.333	-53.654	46.246	29.978	77.506			24.491	47.206	118.612	97.16	-4.75	49.617	15.241	135.204	7.241	10.688
9.467	-11.742	124.38	-53.056	109.509			12.078	100.533	-65.347	58.565	-26.934	24.476	-19.261	121.071	-14.324	-51.388
9.6	23.528	116.444	-11.059	209.964			4.042	97.404	13.447	73.738	-1.948	108.054	12.91	90.435	-6.162	-42.024
9.733	-32.811	70.087	12.087	269.445			15.366	90.334	-9.509	-118.168	31.154	117.896	73.496	137.346	-7.43	-168.38
9.867	33.178	95.877	-22.553	217.871			13.195	109.238	95.383	113.834	3.354	110.491	-38.047	140.849	-33.706	-227.462
10	82.649	16.761	-246.266	183.426			-12.295	45.248	-3.749	-64.579	4.103	94.679	190.477	181.866	-71.828	-360.047
10.133	118.278	25.051	43.203	329.45			-102.98	110.707	58.12	-19.857	12.757	41.784	-45.714	128.332	-100.267	-205.115
10.267	104.61	95.587	-268.638	159.63			116.716	107.851	69.828	-142.883	5.865	42.155	92.751	194.09	10.154	-200.846
10.4	102.072	71.136	-110.913	214.427			-101.673	65.129	33.572	-195.894	7.136	137.801	126.654	170.38	-70.187	-210.942
10.533	113.897	68.858	-157.589	188.521			1.567	129.604	4.961	-149.495	22.056	120.718	59.329	118.225	-66.611	-137.121
10.667	86.964	82.411	11.732	148.486			-24.949	128.852	43.161	-102.769	-11.082	170.416	123.442	158.04	-4.165	116.782
10.8	67.554	11.116	-89.237	78.217			-6.525	114.499	4.817	-37.675	13.551	281.331	74.514	221.363	-31.095	-289.617
10.933	170.521	68.438	-43.367	64.066			-17.006	94.727	48.206	-84.777	98.258	101.796	76.902	207.45	-31.719	-49.795
11.067	181.216	20.893	-108.33	166.25			32.836	160.179	56.633	-51.169	-3.843	98.535	19.28	167.009	-71.54	-143.313
11.2	160.548	75.505	-125.02	130.135			-14.678	76.399	-66.38	-31.278	40.345	125.804	75.891	164.502	-11.328	-161.184
11.333	51.737	112.781	-41.186	68.058			7.837	76.071	123.638	-165.257	12.258	116.32	66.718	193.799	4.476	103.074
11.467	133.127	149.287	-95.635	-60.974			-9.959	130.633	-70.857	-46.6	53.395	68.045	87.206	164.212	-30.997	156.386
11.6	95.893	92.374	-140.434	29.077			-23.987	97.298	118.45	-101.096	14.58	129.843	56.482	212.693	-31.093	202.043
11.733	88.083	84.886	-44.934	-75.605			2.451	101.654	4.519	-135.101	12.969	136.25	21.013	221.084	-42.575	-34.383
11.867	92.56	38.844	-114.397	-20.492			-5.69	61.181	-5.664	-62.198	39.966	105.282	22.461	197.242	7.117	31.44
12	30.675	34.526	-20.917	-14.59			-9.491	119.731	39.277	-116.267	-5.054	104.422	-20.284	128.652	19.702	9.243
12.133	35.035	7.622	-75.969	125.16			20.107	96.863	-44.201	-149.157	9.618	79.668	31.94	167.174	-7.372	-11.1
12.267	-7.873	81.562	-201.019	37.321			26.113	73.634	80.332	-5.351	-12.935	75.739	8.609	132.436	3.097	3.356
12.4	33.372	66.501	116.924	40.66			21.68	105.34	39.805	2.523	7.355	66.359	38.071	109.054	4.207	-2.765
12.533	5.444	53.21	-63.943	80.669			4.702	103.204	-0.744	-12.686	27.766	141.016	-16.845	115.196	-7.402	-35.485
12.667	39.376	52.669	-47.332	-7.391			148.246	148.458	27.508	-20.226	23.608	164.887	25.879	149.047	-21.519	-17.948
12.8	-10.346	25.586	-34.347	79.496			29.194	107.995	38.062	93.209	8.829	189.685	16.424	190.526	22.751	-35.835
12.933	22.891	66.652	145.512	105.737			41.504	102.343	41.799	79.381	3.341	118.75	-8.893	165.428	-6.158	-22.371
13.067	7.422	66.492	216.091	160.433			56.522	110.064	7.215	57.577	4.146	100.825	9.785	157.017	-9.699	-29.788
13.2	-9.498	60.643	121.41	215.396			2.692	70.099	32.102	38.113	-26.03	99.61	-1.296	182.188	10.06	-114.693
13.333	14.962	58.347	157.962	163.419			21.509	133.564	7.344	48.648	16.291	116.838	-18.572	154.424	-14.722	-113.993
13.467	-9.523	49.148	17.026	107.738			-134.351	83.356	40.198	41.52	7.572	175.65	40.408	87.464	-15.347	-244.15
13.6	-10.651	35.087	113.338	77.816			-6.562	112.049	37.192	38.934	-4.144	94.089	-13.834	116.911	-40.912	-205.434
13.733	8.573	10.046	23.669	118.586			3.676	79.746	8.851	60.184	2.259	156.324	61.368	37.79	-38.896	-172.257
13.867	20.613	-24.429	-78.652	132.587			-2.325	116.846	2.422	35.936	11.613	146.327	54.626	28.519	-5.345	-159.168
14	37.991	12.278	70.178	82.617			123.066	122.083	3.108	54.74	7.823	168.012	55.537	76.328	-5.106	-131.106
14.133	92.618	19.07	113.733	70.714			10.539	103.821	27.523	57.312	2.573	91.381	46.753	38.457	-7.809	-124.522
14.267	68.148	-19.589	253.622	85.535			-21.411	80.218	3.003	74.591	11.039	66.234	103.897	19.539	16.839	-237.727
14.4	163.816	3.929	-64.315	155.328			13.723	66.162	27.71	78.888	17.632	63.292	142.925	48.045	-5.653	-174.522
14.533	227.575	48.776	93.126	168.277			7.341	103.463	48.167	68.195	-10.619	116.3	125.529	71.001	-13.48	-151.148
14.667	111.41	44.392	196.809	143.492			22.439	67.542	69.246	52.539	38.202	107.498	215.486	125.635	17.368	-132.363
14.8	84.772	57.347	79.3	152.857			-129.402	113.878	48.929	59.238	-1.913	177.358	89.67	46.123	16.888	-58.377
14.933	78.727	23.57	95.41	77.801			-9.99	65.439	32.443	47.331	2.534	82.641	79.096	74.809	-21.582	-46.261
15.067	90.25	15.257	64.613	107.078			-17.481	106.563	67.685	59.305	5.006	125.837	32.196	66.328	23.175	61.862
15.2	79.438	22.883	72.385	74.354			32.077	44.705	37.456	43.526	-5.986	143.379	-10.284	57.362	-4.82	93.523
15.333	77.279	-28.036	68.598	96.334			98.278	67.25	60.735	37.693	8.832	151.247	118.948	250.588	-76.506	121.282
15.467	93.722	-25.545	66.687	114.542			-2.268	80.664	-9.166	-1.889	-84.517	120.837	63.073	68.921	102.952	108.886
15.6	69.575	-20.278	41.185	168.698			-13.183	162.023	17.412	5.116	25.391	192.687	88.955	53.409	17.047	175.182
15.733	81.273	-21.55	54.644	244.497			-23.329	162.221	31.417	48.263	-6.449	176.716	84.506	148.478	121.209	117.058
15.867	59.408	12.229	1.519	254.96			12.056	112.888	8.125	45.589	13.518	165.301	130.577	273.357	-121.42	113.897
16	70.908	-20.501	81.869	23.395			18.078	124.779	4.001	112.578	90.732	174.05	120.791	106.155	121.786	225.126
16.133	92.413	-11.359	18.133	154.804			-2.513	71.66	-5.676	-82.616	-84.997	92.831	107.644	106.446	-121.731	-114.671
16.267	83.717	21.534	26.484	109.668			25.805	79.902	13.664	-16.182	1.492	174.028	30.557	100.981	122.256	112.266
16.4	83.964	-78.639	1.912	143.933			0.78	161.346	7.067	4.006	5.465	117.575	3.831	59.489	-56.368	-4.465
16.533	98.892	-120.557	13.443	177.216			-1.558	32.322	21.208	5.214	11.456	98.245	-22.359	90.399	-124.174	-4.009
16.667	46.953	-207.193	24.061	145.323			-130.044	134.597	7.138	-19.332	-4.583	50.92	39.901	99.559	242.779	113.377
16.8	-27.586	-252.747	35.494	115.839			1.729	137.21	19.382	30.755	13.801	110.087	88.964	162.507	-120.743	114.192
16.933	66.336	-292.73	30.551	97.782			-22.172	99.676	7.578	-49.941	37.359	109.726	0.887	107.005	122.063	112.757
17.067	64.214	-244.2	43.011	91.737			19.836	169.741	18.706	13.571	81.367	187.787	3.055	168.62	-121.234	10.258
17.2	39.391	-472.078	40.568	68.343			17.357	59.398	15.134	33.196	45.628	172.141	-7.608	198.238	-119.401	224.817
17.333	55.344	165.553	69.193	26.757			-24.81	124.801	-14.223	115.373	-3.826	167.071	-123.859	269.892	125.069	-112.928
17.467	13.582	-66.445	174.349	89.829			-24.977	112.403	51.903	-70.528	10.709	106.097	129.292	219.498	4.914	112.713
17.6	62.46	8.942	54.276	96.367			-16.389	125.303	19.324	29.789	15.35	177.722	10.42	181.357	22.26	3.679
17.733	57.546	-170.215	56.04	138.848			130.736	117.369	61.684	-2.166	25.246	167.399	-22.21	168.291	-123.979	-112.974
17.867	113.449	-680.633	18.65	271.746			11.134	158.287	1.879	-4.342	-6.504	184.967	13.603	164.802	121.558	-228.122
18	109.933	76.127	23.769	18.434			-26.59	109.09	6.777	-10.727	-23.457	123.032	-21.372	129.989	-121.14	-114.453
18.133	87.575	-289.457	35.703	239.124			-79.477	126.023	12.33	-4.508	107.15	123.575	71.475	119.758	120.74	-4.508
18.267	57.621	-26.198	63.724	124.495			102.768	91.01	-7.535	66.547	-9.476	190.135	28.933	121.481	-14.624	6.192
18.4	104.606	-75.092	-20.55	157.662			-23.377	101.656	17.959	51.933	-28.72	169.019	4.747	109.946	-121.353	-1.795
18.533	112.629	217.208	66.612	118.914			-10.933	102.687	30.764	170.08	-27.746	169.298	17.271	99.431	4.375	-2.019
18.667	11.034	-229.299	163.392	104.645			-10.758	66.286	49.157	-23.253	55.538	106.876	22.51	79.114	-123.803	-9.708
18.8	68.024	-37.571	134.737	84.228			-20.837	107.697	6.165	158.74	-9.843	56.853	23.685	29.89	1.339	-1.935
18.933	43.473	135.28	15.853	54.182			-11.18	88.25	27.207	-48.499	-27.58	90.845	3.695	-39.619	122.113	18.085
19.067	91.84	169.5	-76.607	88.16			34.54	67.552	10.874	239.688	12.214	101.373	-11.544	-15.91	-243.513	-225.425
19.2	47.667	240.708	40.993	78.372			-2.086	96.557	-14.521	126.105	23.863	88.378	-4.381	-91.371	246.553	7.945
19.333	98.481	408.575	50.531	48.622			-4.397	94.661	23.991	30.045	22.023	83.366	-11.326	-177.664	-121.58	225.285
19.467	88.373	154.274	194.64	93.422			3.376	103.625	-11.898	198.056	0.728	-140.878	21.802	-352.986	1.545	-28.273
19.6	109.326	201.464	-305.156	65.369			-8.595	121.292	-6.733	126.616	24.219	-550.442	-1.888	-351.397	3.194	112.866
19.733	61.882	146.1	-73.955	132.23			2.969	108.38	13.034	128.269	-9.245	-584.255	-51.424	-355.007	122.05	-4.824
19.867	54.344	285.626	-42.678	142.425			15.932	58.22	-12.926	109.427	23.754	-553.997	36.763	-334.689	-19.193	113.004
20	-101.737	216.458	154.628	179.22			23.294	70.892	25.561	79.657	11.446	-484.663	-136.576	-272.073	-123.115	113.22
20.133	17.986	141.779	-165.751	151.477			32.547	90.086	7.959	72.092	-4.059	-332.78	127.754	-234.831	10.778	226.417
20.267	47.097	173.702	41.157	114.988			-4.172	109.08	25.509	66.721	-21.742	-130.742	18.123	-161.322	4.46	-114.118
20.4	91.014	136.138	31.439	159.765			2.886	31.289	-9.979	69.757	-2.97	-50.655	-1.294	-167.88	-22.809	113.507
20.533	99.453	109.669	-10.824	89.217			-96.05	69.247	-15.156	65.025	32.374	25.576	14.803	-11.567	-12.592	112.472
20.667	64.523	144.399	85.183	77.084			-37.915	70.062	-4.908	9.216	-12.75	107.221	15.889	22.047	10.777	112.929
20.8	38.327	179.139	21.226	71.917			3.581	78.245	8.027	20.847	16.862	110.826	22.82	144.24	-121.226	1
20.933	30.967	158.501	-69.849	44.713			-7.757	98.692	1.296	-8.023	6.113	167.802	12.451	183.794	6.311	113.731
21.067	62.45	236.638	196.063	-45.951			-16.539	68.337	-16.717	76.765	1.794	63.993	30.397	112.555	-241.155	226.047
21.2	113.975	205.272	104.356	-64.45			32.973	49.923	18.881	71.305	1.361	141.835	23.048	195.653	-1.024	113.127
21.333	89.07	186.93	199.45	-153.789			23.069	69.09	-5.351	85.455	18.6	195.284	20.29	145.887	-0.949	12.674
21.467	154.204	314.288	125.354	-229.362			9.951	42.33	10.231	25.667	-6.023	151.695	94.404	98.634	121.066	112.616
21.6	124.095	172.726	67.334	-254.524			16.221	28.314	44.146	-20.84	3.088	94.389	84.646	117.333	-121.347	225.648
21.733	125.261	225.242	-45.309	-251.882			-44.287	100.861	33.073	21.301	15.793	89.604	89.652	142.93	121.206	-16.708
21.867	133.596	165.049	183.124	-263.943			114.976	42.394	37.381	-10.231	0.024	101.383	70.784	153.314	-121.205	113.53
22	70.501	187.071	50.419	-236.689			12.728	32.857	26.086	-4.621	-8.589	98.715	83.362	187.878	122.034	3.153
22.133	56.743	81.169	66.814	-189.048			-13.666	23.129	26.686	34.274	15.063	117.399	16.616	206.622	-121.364	113.408
22.267	6.323	45.109	54.566	-190.842			-106.913	59.597	-1.301	10.99	13.128	85.531	-1.13	243.502	21.901	113.769
22.4	49.38	76.168	77.681	-232.141			11.807	56.19	4.273	72.139	-2.388	74.986	21.864	253.321	-16.057
22.533	50.193	-30.047	120.307	-304.562			-24.178	51.515	8.65	38.715	0.411	59.577	91.846	200.948	241.035
22.667	75.686	-74.677	63.891	-338.573			13.342	108.376	65.869	78.174	-5.86	159.563	124.208	176.884	-3.985
22.8	82.171	-242.285	40.137	-292.443			24.387	60.943	33.048	86.605	14.095	127.874	89.23	171.828	-121.308
22.933	74.371	-343.403	-42.315	-276.368			-22.004	90.585	90.893	77.17	-10.182	117.671	85.094	217.572	8.507
23.067	46.246	-319.924	188.824	-233.469			38.949	89.324	71.928	111.44	31.429	151.373	142.528	315.607	-288.22
23.2	80.807	-413.016	-76.324	-231.966			9.063	80.678	60.008	39.787	-27.722	110.814	65.691	252.23	-30.534
23.333	59.135	-77.444	89.592	-89.611			-23.044	37.604	5.98	72.491	25.156	132.636	81.66	239.537	8.107	115.423
23.467	57.367	156.806	131.456	-55.641			24.419	67.509	43.199	26.413	-17.691	121.181	20.975	257.353	-30.154	-14.81
23.6	93.853	338.57	-28.409	43.039			-30.373	105.679	9.223	49.23	34.518	28.267	51.247	280.989	-12.467	32.805
23.733	46.323	195.058	50.024	126.03			132.96	62.44	-8.411	73.612	-12.9	94.375	62.079	211.011	2.487	29.915
23.867	60.24	189.905	94.385	91.287			24.104	25.119	30.196	65.551	2.268	95.227	93.646	270.384	-4.323	32.046
24	47.121	106.115	216.92	196.75			34.48	65.706	41.38	68.525	11.648	83.178	31.131	239.429	-86.724	105.699
24.133	-14.4	44.424	67.223	329.189			12.938	20.753	3.753	93.361	10.406	88.537	49.259	287.369	-26.117	87.49
24.267	17.761	237.492	-21.189	310.789			41.582	66.406	-12.19	98.619	17.376	124.017	61.235	241.432	4.964	88.928
24.4	33.844	195.521	158.036	334.579			53.313	79.837	-12.192	74.451	-0.279	87.554	47.922	278.575	101.378	33.633
24.533	95.356	149.585	59.262	307.155			53.735	63.509	29.43	41.26	-9.027	71.59	50.149	275.625	-36.681	33.964
24.667	119.3	102.416	15.338	279.313			18.687	60.924	34.395	62.713	6.092	74.33	64.232	259.216	-1.457	14.482
24.8	140.059	144.55	46.916	197.412			24.262	104.656	29.506	55.794	-18.212	113.292	57.691	140.752	35.488	26.487
24.933	111.377	17.29	97.114	105.613			41.99	47.226	61.891	40.929	8.111	92.006	66.736	243.382	6.419	-47.241
25.067	106.408	51.88	117.816	53.812			-54.949	59.528	40.803	75.304	14.029	51.738	106.698	190.229	21.243	-19.161
25.2	125.558	38.538	90.294	146.079			-112.984	-13.544	32.42	58.957	-3.608	96.199	71.148	202.199	10.541	57.19
25.333	111.661	111.556	94.249	174.091			-30.76	55.076	40.578	30.523	4.199	120.96	-11.512	193.274	-13.275	44.966
25.467	70.214	-79.075	69.411	146.311			-13.824	60.679	40.847	75.579	-1.455	61.234	136.277	206.386	70.615	92.148
25.6	63.621	6.016	57.167	186.179			75.975	65.873	27.413	85.928	2.701	57.731	25.448	187.607	44.932	56.535
25.733	101.938	8.937	56.63	148.581			10.013	67.353	27.301	92.872	-27.742	42.996	57.676	11.185	39.45	94.667
25.867	81.814	9.418	70.434	169.729			46.927	71.861	7.748	59.129	4.064	78.674	52.395	-262.816	8.379	1.714
26	114.942	4.02	58.547	118.086			20.686	65.761	-5.976	56.412	13.341	128.976	39.183	-295.197	6.967	2.303
26.133	86.433	-12.615	72.294	163.384			20.556	108.186	-8.547	40.246	8.282	158.408	25.077	-58.228	-27.687	9.393
26.267	103.865	-12.209	60.124	136.308			62.808	74.606	18.803	8.583	16.644	154.357	56.912	3.586	4.654	0.305
26.4	92.795	7.618	68.594	167.65			30.34	-10.354	16.259	16.469	-14.093	78.917	85.773	115.304	-2.127	14.232
26.533	87.85	76.747	25.824	158.113			-107.821	46.218	37.982	41.187	5.227	111.896	48.147	28.092	26.063	-15.656
26.667	65.173	5.902	-77.669	58.24			-6.412	88.576	14.299	56.399	-14.72	103.635	110.646	113.747	2.477	44.875
26.8	53.415	-100.9	134.259	96.873			-9.696	15.182	20.764	36.003	17.598	102.978	120.079	183.79	15.377	27.324
26.933	175.736	-12.406	25.236	54.874			48.246	53.701	5.956	-0.736	-0.378	122.396	77.556	165.609	-8.289	68.362
27.067	165.647	-440.807	19.239	79.367			-35.822	62.408	3.35	44.57	-19.139	101.368	99.337	184.615	-6.323	61.59
27.2	160.38	-314.588	36.414	112.552			20.668	172.281	9.776	3.534	7.974	86.536	60.938	155.763	-4.075	112.616
27.333	147.251	-424.312	-18.326	51.023			118.748	86.523	-13.48	-2.316	-1.622	105.764	94.071	130.561	-89.099	129.057
27.467	110.183	-412.457	-70.19	71.797			20.334	-15.729	-5.016	26.694	1.231	109.976	107.166	152.449	-2.319	75.073
27.6	67.628	-379.449	28.006	96.573			-5.261	23.157	-0.973	-13.075	14.08	109.46	99.406	141.236	17.132	42.703
27.733	47.812	-149.752	21.265	138.017			-15.75	-12.126	6.025	-3.88	5.786	33.013	129.032	157.096	57.68	51.418
27.867	83.121	-25.649	19.619	306.744			-11.857	193.477	17.885	6.771	-0.432	253.75	129.525	38.318	240.213	117.408
28	72.533	21.681	157.378	172.639			11.341	8.618	7.583	29.637	-6.14	188.316	122.424	54.749	15.296	116.335
28.133	48.568	5.205	-121.585	106.905			0.265	45.934	-7.424	15.929	-11.638	248.936	61.588	62.694	-80.378	-49.077
28.267	151.606	29.754	36.521	97.07			28.825	199.74	14.351	11.866	-5.093	114.627	114.311	75.13	83.758	23.003
28.4	52.394	91.499	-29.454	154.711			15.22	-24.152	-14.845	9.903	0.682	123.792	141.29	109.898	122.901	116.012
28.533	69.245	32.872	33.066	40.17			13.736	101.056	15.564	-28.063	7.967	202.708	180.881	71.268	124.608	-115.87
28.667	104.078	168.858	103.034	-6.502			10.046	168.905	-23.328	44.751	-0.727	90.141	100.948	108.924	122.439	15.891
28.8	127.742	148.98	-76.605	15.941			30.75	130.456	5.109	4.464	9.677	28.483	126.253	115.65	-25.722	114.63
28.933	69.776	100.972	18.142	-8.8			-25.884	53.335	9.992	37.743	-20.798	120.02	142.926	147.911	120.804	-1.256
29.067	115.42	93.952	172.442	75.075			91.485	46.654	-18.023	-33.221	-0.542	108.689	98.205	181.679	-23.632	10.598
29.2	40.177	87.673	-4.875	84.458			-47.574	150.165	10.072	-18.634	4.728	97.134	69.584	159.141	-22.832	-18.267
29.333	74.283	120.307	47.787	277.854			20.115	32.266	-3.684	62.439	-16.316	102.619	-7.454	150.276	-6.508	0.968
29.467	30.174	155.154	-86.446	105.861			42.074	72.906	19.581	51.426	3.117	106.373	153.014	112.434	21.721	14.341
29.6	86.24	236.237	51.314	87.625			45.391	84.913	3.701	83.152	16.149	144.19	107.087	123.529	11.122	-12.867
29.733	109.034	215.706	11.429	30.007			23.531	106.337	11.429	-3.712	1.279	122.525	93.396	130.587	5.091	-115.152
29.867	104.627	173.626	80.601	10.844			6.46	113.202	-6.789	54.683	2.309	55.295	147.673	30.259	242.961	16.894
30	83.334	170.61	27.231	234.697			8.179	85.924	-11.763	60.879	0.377	104.793	124.908	-17.052	12.713	5.885
30.133	114.446	190.372	20.619	-129.748			-14.402	113.893	18.875	178.771	-0.096	119.854	81.45	-44.105	125.574	-114.665
30.267	79.514	177.781	-62.038	155.695			16.401	82.45	-12.488	134.808	-58.021	135.119	77.895	-1.169	122.888	-16.167
30.4	46.11	280.19	14.888	-139.496			8.872	67.215	14.453	142.847	-12.045	170.412	116.599	49.966	-10.909	-229.595
30.533	86.049	236.988	5.113	-24.383			9.152	83.194	-2.811	101.466	-115.625	174.856	115.963	74.993	-121.663	-229.609
30.667	76.217	246.234	4.92	79.129			1.989	74.528	19.17	73.054	-163.27	126.847	122.025	260.149	121.626	5.58
30.8	69.411	244.499	-24.367	11.525			2.696	100.756	3.634	2.783	-155.358	144.505	68.561	144.281	14.313	-341.645
30.933	57.538	323.12	-44.315	42.803			-0.217	76.848	1.252	-27.25	-153.22	91.635	99.427	202.379	121.971	-115.093
31.067	133.468	367.158	196.884	71.724			-5.218	97.166	-0.865	-23.182	-69.311	88.85	153.581	180.208	121.096	-116.61
31.2	51.214	580.977	8.61	42.874			30.204	121.965	-8.337	59.74	-71.369	53.183	127.68	116.28	121.405	-346.212
31.333	133.732	131.844	33.528	40.434			-6.455	67.117	3.364	105.707	-170.311	103.549	188.94	22.676	121.993	-118.318
31.467	158.211	174.565	-78.016	19.248			-30.75	85.72	1.92	127.396	49.364	101.248	147.396	17.503	-20.242	-231.802
31.6	187.807	396.992	-5.542	83.042			42.828	85.274	-3.178	26.73	-109.212	43.253	178.182	76.167	120.746	-233.44
31.733	190.919	148.004	17.867	39.664			-1.834	95.369	-3.615	79.878	43.636	120.101	84.034	20.543	240.934	-228.43
31.867	156.579	199.018	-8.101	171.775			-11.08	105.064	-1.091	128.235	-125.641	19.431	118.908	45.438	1.218	-341.916
32	87.281	212.028	-93.497	65.881			-82.914	59.992	20.809	134.926	-0.427	72.403	122.556	50.714	-120.855	-115.628
32.133	37.113	188.641	-78.145	88.451			86.811	69.986	-10.53	68.433	-12.041	80.119	146.591	101.136	122.731	-228.435
32.267	110.363	107.972	-208.693	-71.429			-14.88	98.786	-2.423	69.458	-20.055	33.106	80.902	102.29	-121.802	-340.632
32.4	38.47	38.514	-20.635	67.671			-10.223	86.556	-8.838	-21.092	-39.51	90.922	180.525	103.393	242.114	-115.024
32.533	140.174	-20.394	-195.422	10.781			-5.763	106.168	9.314	-16.802	-8.729	65.323	73.764	117.008	-5.545	-457.573
32.667	135.308	79.652	-135.474	19.912			-96.99	81.844	6.746	-42.648	-25.053	48.374	98.592	111.146	-121.479	-231.303
32.8	106.178	-10.026	-116.845	152.731			110.98	67.802	-7.443	19.648	-43.909	161.011	106.923	125.931	-5.561	-344.961
32.933	102.231	-5.463	-127.548	46.278			-1.588	74.832	-8.563	36.29	-6.441	154.992	119.319	150.787	-120.916	-344.844
33.067	54.745	105.26	-110.161	-98.555			-1.242	119.703	-11.184	19.696	26.735	132.395	97.393	126.626	123.083	115.526
33.2	58.634	148.718	-77.354	11.675			47.815	31.258	9.728	28.548	21.08	59.362	93.013	112.219	-22.137	-2.932
33.333	88.538	-8.98	-36.013	12.491			-15.572	85.844	17.328	3.111	23.847	100.801	121.136	175.351	121.666	2.807
33.467	251.208	29.842	-15.96	172.925			-184.715	74.283	-8.884	86.258	-6.707	80.465	128.943	94.757	10.781	114.796
33.6	230.198	134.203	42.562	92.137			11.419	188.841	17.876	336.304	-3.441	284.508	137.668	153.562	120.772	114.671
33.733	128.373	-140.094	15.974	39.953			106.187	119.493	-18.668	106.46	-10.998	110.499	101.7	130.749	-12.37	5.129
33.867	91.634	134.906	3.651	83.968			-23.299	111.176	-10.215	92.583	-7.694	130.695	114.911	207.34	15.785	229.353
34	6.042	1.68	20.527	116.039			-9.377	99.033	-19.22	51.457	-4.769	96.603	108.146	210.434	122.898	229.695
34.133	11.556	12.663	23.627	123.921			-19.352	212.787	22.473	-32.629	-5.55	111.134	145.787	160.659	-123.767	114.718
34.267	19.306	4.035	48.933	95.302			-87.723	100.843	-3.688	-79.553	-12.445	11.631	176.73	190.522	3.537	114.81
34.4	50.801	1.804	38.899	108.333			-130.207	94.978	10.9	-79.273	-5.04	-36.315	129.116	152.62	121.198	114.76
34.533	113.795	8.923	103.876	114.689			-158.892	143.135	17.474	-5.11	2.058	147.511	206.398	158.993	120.787	114.306
34.667	88.885	0.64	-3.756	113.875			-110.807	62.119	-16.381	-51.688	24.444	119.195	124.101	146.223	-6.088	114.556
34.8	124.998	-1.558	-0.925	148.217			-156.429	60.535	0.827	-10.069	9.837	124.313	15.942	174.334	121.622	4.323
34.933	89.631	-3.209	93.536	80.329			-104.813	105.719	-10.123	-33.969	12.575	105.608	138.053	158.199	3.392	114.143
35.067	50.918	-14.464	20.234	54.562			-202.277	120.655	-16.665	-83.34	1.038	44.324	177.095	211.288	121.136	113.869
35.2	41.479	-133.11	145.612	65.835			-58.541	99.789	8.849	-86.085	7.519	17.148	134.123	156.745	2.159	6.335
35.333	26.335	268.972	73.759	202.253			-47.172	82.798	14.773	-41.27	14.579	15.616	195.131	206.888		228.436
35.467	-6.007	-134.367	33.342	45.368			36.839	127.262	28.968	-128.527	-3.171	-64.269	113.505	224.411		-17.309
35.6	11.571	133.6	64.539	72.645			19.976	95.057	2.944	-166.093	-8.68	57.094	124.489	179.48		112.205
35.733	29.939	5.445	80.517	107.996			139.81	81.875	2.132	-160.773	-6.675	63.189	120.859	230.997		32.244
35.867	166.183	1.845	71.604	92.243			16.848	106.261	-3.612	-88.791	2.965	59.612	126.075	184.357
36	70.761	-3.688	75.613	35.197			17.617	119.051	-6.248	-90.461	-7.294	52.763	112.752	234.022
36.133	-112.2	-132.974	16.65	22.622			-90.704	199.085	-6.713	-76.281	16.804	-9.459	144.779	166.257
36.267	154.529	133.332	60.173	58.586			-18.937	130.899	-10.706	96.399	-3.613	-9.008	110.138	198.422
36.4	-61.396	268.658	73.23	47.38			-38.057	127.547	6.8	-16.293	18.739	-2.62	128.951	154.267
36.533	152.286	267.964	84.829	186.078			-14.045	112.836	15.9	87.966	2.03	14.613	91.842	225.09
36.667	68.182	133.274	-49.577	62.988			-46.563	139.442	2.439	84.465	-4.824	-112.09	94.492	215.239
36.8	62.448	-11.316	182.651	79.15			22.372	108.607	-7.067	41.641	12.612	-76.552	193.101	232.575
36.933	63.734	-7.084	27.717	100.152			8.954	173.196	16.605	88.212	-2.171	-196.773	87.562	225.32
37.067	47.088	-2.166	52.292	73.019			19.81	65.782	-11.721	44.401	1.848	-355.26	13.901	221.473
37.2	18.275	-6.188	68.518	107.557			23.94	110.019	-4.51	52.667	8.78	-290.035	116.114	203.377
37.333	34.795	132.121	104.735	108.828			22.512	107.671	2.691	68.277	-4.472	-343.423	214.245	272.251
37.467	20.766	-3.994	-83.275	111.359			19.778	91.962	-18.065	88.117	4.982	-312.52	12.93	244.043
37.6	-3.72	-132.958	68.346	-38.022			4.322	119.23	-7.817	75.683	-4.448	-223.281	106.863	195.525
37.733	88.705	132.618	94.827	170.789			-31.534	79.259	-10.416	97.498	5.722	-202.619	203.51	189.008
37.867	81.647	-133.504	-10.373	80.637			27.54	104.747	20.115	77.544	-12.929	-165.135	81.97	210.606
38	89.416	132.537	79.371	80.313			-13.018	119.993	48.947	113.866	0.922	-170.642	77.265	204.138
38.133	59.368	-133.112	-8.84	-19.49			-15.996	68.551	14.956	40.864	16.328	-190.742	145.468	231.41
38.267	63.11	-13.782	8.439	245.998			24.862	133.966	4.81	49.939	-7.868	-184.843	176.793	214.313
38.4	39.064	-134.614	7.735	-8.883			27.321	78.441	39.667	93.797	8.51	-235.008	123.709	222.746
38.533	29.451	-662.877	116.254	124.973			5.77	130.361	34.473	8.962	-17.835	-243.451	90.959	176.823
38.667	-42.704	-6.844	-103.208	127.756			-8.653	122.353	39.036	71.28	14.18	-225.976	130.39	209.391
38.8	-11.268	-396.804	123.863	155.75			29.263	80.524	40.237	66.787	1.63	-202.605	137.606	175.778
38.933	40.872	-658.243	12.804	149.258			-25.522	137.966	42.099	67.818	-10.918	-168.631	125.169	210.469
39.067	100.38	-133.879	5.283	236.212			127.993	175.698	37.174	29.851	-17.073	-198.032	98.305	218.352
39.2	144.531	-132.69	6.973	121.132			19.23	108.533	21.386	52.475	0.304	-164.029	91.942	231.554
39.333	239.197	132.736	-84.396	110.21			46.022	67.832	45.89	65.375	28.481	-141.12	114.614	216.911
39.467	162.767	-132.822	13.343	90.529			-92.57	-31.578	49.726	91.584	9.019	-164.489	114.619	208.427
39.6	149.143	135.225	16.091	-30.983			41.74	170.059	9.26	97.146	-6.405	-39.636	116.452	271.082
39.733	136.043	-131.927	30.101	140.704			36.176	92.387	20.173	33.249	-0.781	-15.658	116.91	158.443
39.867	133.537	3.151	19.312	115.333			29.304	111.081	15.39	103.463	7.164	50.63	150.335	146.465
40	136.057	-6.117	-16.322	98.262			36.141	111.515	8.975	76.768	-18.549	196.861	181.494	180.369
40.133	66.235	-0.407	20.253	119.814			28.589	147.433	-32.06	37.331	7.425	250.792	121.753	167.436
40.267	32.927	264.954	10.864	113.845			52.701	220.676	47.378	97.393	-18.506	111.815	149.128	165.458
40.4	22.322	-132.891	-7.461	108.543			15.305	67.698	3.741	33.642	1.714	40.147	167.765	178.35
40.533	19.812	133.318	3.301	99.781			35.504	55.176	17.403	92.47	-8.064	5.493	152.699	175.295
40.667	29.413	-133.05	-19.063	131.388			74.16	37.268	33.061	45.474	14.367	-6.758	87.239	147.939
40.8	46.117	134.254	5.336	141.016			44.657	20.628	42.391	57.047	8.853	-73.578	107.511	197.649
40.933	128.967	132.888	12.468	100.578			6.46	54.41	15.947	49.489	-19.505	18.562	156.652	174.066
41.067	56.763	-20.312	17.282	123.679			59.332	123.875	51.579	70.087	27.138	182.306	117.519	200.144
41.2	36.785	133.167	-0.312	69.054			55.909	156.104	19.49	64.811	-27.639	90.33	135.419	167.309
41.333	11.192	8.544	13.641	156.152			-19.043	141.578	23.139	75.248	-4.578	109.389	146.455	172.553
41.467	45.79	133.539	-7.297	161.144			6.206	70.669	5.706	112.489	-10.377	82.159	170.28	167.202
41.6	19.182	4.672	18.179	109.271			52.231	113.141	16.411	83.994	-17.809	107.65	132.329	147.513
41.733	16.313	133.338	98.291	85.659			39.546	146.704	15.966	57.894	2.004	62.602	149.317	134.235
41.867	-14.314	-133.074	96.582	106.561			-7.565	79.282	-20.428	94.109	-5.191	27.331	105.466	178.653
42	-13.478	266.555	49.361	235.287			78.024	103.727	6.569	66.57	15.683	41.002	174.178	173.166
42.133	-98.455	-2.632	74.154	133.536			46.391	118.798	-2.621	96.858	1.116	18.141	195.242	143.498
42.267	-104.091	135.988	19.909	-8.299			18.309	83.41	-1.911	66.578	12.339	47.354	159.336	169.631
42.4	-100.067	-133.435	9.089	224.686			19.232	102.603	38.827	134.414	-4.508	48.135	162.424	159.889
42.533	-146.662	2.8	18.256	100.793			39.934	101.765	-0.719	110.432	6.859	20.636	173.21	160.814
42.667	-171.346	0.785	33.176	132.264			25.22	144.48	12.015	88.085	-10.465	48.668	147.558	195.437
42.8	-77.278	2.311	60.044	105.243			40.213	118.265	13.61	119.879	11.909	27.875	82.646	146.009
42.933	-95.353	6.142	85.999	-8.59			45.333	17.243	3.279	79.645	-24.689	125.44	116.708	156.097
43.067	-106.517	-133.288	34.664	121.762			37.095	63.28	-16.492	108.307	6.74	75.621	118.036	190.846
43.2	-177.043	-265.237	21.465	67.47			44.707	53.339	14.248	109.95	-4.994	146.161	139.133	118.26
43.333	-87.93	-132.703	6.215	119.5			48.964	39.131	14.981	86.935	4.12	260.543	103.702	129.989
43.467	-82.016	-132.672	3.252	93.081			53.836	83.162	-11.344	147.383	14.087	117.649	85.406	113.728
43.6	10.978	-263.813	-50.735	44.5			1.105	34.031	-5.495	140.466	8.984	116.173	102.382	107.404
43.733	-39.526	15.72	-115.542	165.293			44.781	70.202	-14.264	115.997	-6.251	179.894	106.012	142.949
43.867	32.117	12.024	-107.52	120.258			18.819	146.155	18.84	163.127	-3.082	131.722	93.222	163.742
44	96.606	-131.933	-105.238	135.687			44.122	87.099	5.598	73.306	3.041	98.758	51.902	188.666
44.133	77.38	6.097	43.9	136.637			26.471	54.679	8.225	75.794	1.085	95.916	133.024	142.191
44.267	135.885	4.332	-269.197	137.462			28.883	81.572	7.901	174.99	17.711	99.561	122.194	157.181
44.4	125.41	-133.05	-74.74	77.333			25.866	85.692	19.983	96.948	5.107	102.462	125.419	140.176
44.533	67.822	-7.966	-141.157	113.258			6.764	59.11	3.084	103.034	8.615	109.74	100.757	111.289
44.667	117.457	132.292	-23.244	67.028			-11.037	32.921	-18.932	57.537	0.647	95.277	126.345	102.278
44.8	94.232	-7.436	-95.184	101.999			-35.837	121.806	14.468	45.315	-5.16	105.114	160.329	113.958
44.933	77.378	-133.449	-132.859	45.308			10.203	-14.122	-3.799	49.871	12.819	56.163	71.775	111.801
45.067	53.756	4.918	-169.219	56.103			25.956	79.626	7.184	54.33	-7.915	70.258	103.607	106.062
45.2	63.729	7.251	-99.995	-9.354			1.619	164.739	-8.195	59.305	-30.782	97.699	126.739	67.343
45.333	51.784	7.274	20.72	82.381			73.498	72.715	7.078	119.602	-81.559	142.119	128.038	87.536
45.467	80.243	-11.79	22.099	140.936			-38.072	145.246	-6.249	131.488	-12.621	35.321	143.536	116.025
45.6	106.121	-133.29	-142.461	119.493			21.619	103.252	-6.818	195.39	-55.271	132.962	107.201	116.656
45.733	171.601	265.185	40.5	44.836			-29.095	142.872	-1.692	104.258	-18.608	234.995	72.295	158.946
45.867	74.824	5.351	89.282	103.742			0.451	113.449	11.048	182.583	-51.68	-28.875	51.516	107.347
46	116.403	-1.898	-14.675	66.641			12.328	88.923	-7.145	16.183	-45.134	165.074	23.836	134.418
46.133	74.246	-17.75	11.39	114.212			-6.892	141.33	23.533	154.516	-10.587	155.594	95.147	92.504
46.267	18.294	-13.494	78.125	90.58			-13.269	91.982	11.825	125.936	-7.429	163.28	77.123	154.878
46.4	65.384	132.444	38.582	51.287			21.709	77.101	-4.604	49.618	-21.64	151.5	130.681	182.313
46.533	71.412	265.756	78.281	81.401			-4.586	95.774	4.927	67.05	-17.54	254.23	100.89	140.707
46.667	149.845	133.224	70.532	25.482			-18.23	131.167	3.869	114.197	12.491	69.346	91.106	146.451
46.8	127.249	268.178	87.352	36.724			13.909	71.131	1.741	94.559	-17.007	101.458	28.619	108.485
46.933	171.95	-133.689	99.991	105.765			-8.485	75.528	-6.121	26.306	4.904	158.872	50.555	114.789
47.067	106.217	268.481	86.81	119.982			12.196	53.641	14.069	55.915	12.576	191.092	84.035	66.217
47.2	85.747	5.482	238.946	65.157			4.183	95.291	-9.267	18.782	14.199	176.828	57.278	210.768
47.333	78.555	269.005	-109.002	161.459			4.491	76.508	10.353	48.293	10.372	178.227	60.755	209.899
47.467	136.422	9.944	55.689	65.682			-6.302	100.619	-2.325	-23.415	-2.746	210.85	32.213	103.806
47.6	80.582	268.225	131.566	6.704			6.332	59.461	0.169	-48.311	-15.669	174.409	14.597	127.266
47.733	133.237	10.551	61.617	26.032			8.409	92.319	3.122	83.032	18.986	174.311	32.748	73.327
47.867	146.845	8.212	69.437	-146.097			-3.41	115.647	-4.765	17.302	24.124	161.061	-11.576	94.503
48	207.283	135.42	61.055	20.442			-9.313	-16.814	-6.059	104.569	12.877	78.322	6.56	109.175
48.133	104.05	14.89	36.238	-75.459			-10.867	242.932	10.766	141.488	-10.686	87.989	36.154	83.807
48.267	224.842	1.214	67.807	-165.839			1.38	70.109	-3.827	104.839	-5.536	42.825	23.738	55.949
48.4	150.147	133.856	13.875	-222.025			1.402	104.671	5.136	68.306	95.944	28.474	83.578	159.296
48.533	136.293	-4.13	43.374	-272.659			19.624	126.528	-2.708	-27.342	-31.417	79.453	88.288	42.186
48.667	42.805	-133.328	82.377	-22.798			-2.569	109.439	7.918	-97.428	1.57	60.105	70.131	61.254
48.8	36.522	5.239	44.725	-175.216			8.715	124.369	-9.805	-71.863	28.726	33.965	81.488	-25.663
48.933	34.341	135.291	174.8	-228.545			-19.164	107.809	4.52	-163.286	3.491	29.955	75.06	54.518
49.067	-15.508	134.103	-40.138	73.294			24.706	75.299	-3.056	-32.239	56.736	18.196	51.77	51.538
49.2	38.009	133.457	70.946	-31.681			-17.514	86.577	-9	-108.012	14.807	27.976	185.17	22.122
49.333	30.075	133.117	80.272	-209.716			-11.769	62.532	-5.071	-169.147	6.674	59.922	-60.734	63.104
49.467	12.964	6.826	178.947	-51.623			15.587	59.599	0.351	-138.715	-39.088	35.722	127.451	56.271
49.6	97.403	1.801	-13.96	-14.382			22.605	52.578	10.75	-147.563	68.748	-5.595	-97.935	67.06
49.733	78.642	-0.56	30.255	86.111			-3.106	104.722	-9.197	-70.77	-8.694	-12.059	52.614	77.392
49.867	184.698	3.593	175.746	174.726			4.402	102.316	0.721	-45.467	9.908	22.507	119.647	55.476
50	167.3	-5.748	85.065	85.955			13.198	55.648	-4.657	-39.299	-20.404	41.293	137.274	28.473
50.133	159.509	133.029	-100.174	116.936			25.062	91.65	11.06	11.004	22.306	12.771	100.137	15.723
50.267	173.041	2.805	60.1	137.714			-18.264	90.317	-6.479	89.619	-2.675	8.775	125.956	68.268
50.4	76.898	-2.805	18.39	116.989			2.15	75.276	-12.011	121.554	9.035	-49.378	60.182	92.088
50.533	107.302	133.091	-6.618	77.25			1.221	81.802	-1.061	167.77	24.241	11.311	13.519	18.201
50.667	95.247	0.774	111.741	111.429			-4.184	80.973	-2.008	166.354	4.852	9.772	84.672	33.309
50.8	78.229	-4.08	-81.27	84.049			26.027	95.415	14.434	141.255	-73.473	-21.92	6.49	105.369
50.933	77.659	132.778	-53.421	69.988			-12.502	76.205	-7.015	116.022	18.406	-16.5	24.178	111.597
51.067	151.715	-7.714	8.525	136.084			-12.304	102.167	4.651	177.163	23.959	91.707	-12.933	52.993
51.2	93.581	-9.223	148.384	53.375			20.182	56.959	6.896	84.573	-19.346	103.931	115.258	50.89
51.333	76.079	132.95	-82.399	138.809			-17.672	119.807	2.762	43.951	40.165	352.658	-86.591	65.563
51.467	85.54	4.762	53.756	84.203			32.259	130.374	-9.634	41.984	29.258	301.874	118.803	44.096
51.6	94.617	-265.541	-26.08	96.321			-9.398	113.013	-12.029	23.539	20.834	221.396	-105.28	71.204
51.733	106.18	-132.914	11.904	72.119			23.648	110.436	-4.265	-1.505	10.512	102.89	6.911	55.103
51.867	90.038	4.829	18.408	170.784			-29.2	83.527	8.077	-19.645	45.372	-65.919	-13.946	132.274
52	91.814	-132.938	55.997	80.951			9.402	155.197	-11.833	6.682	-9.056	58.782	27.045	120.973
52.133	120.02	-133.044	-24.053	44.553			-9.875	114.66	16.157	3.725	30.827	76.129	2	68.228
52.267	103.131	-133.539	207.749	40.496			-31.404	121.171	10.554	-17.671	26.173	11.282	105.245	100.982
52.4	68.392	-7.129	40.041	59.625			15.83	134.622	-12.794	-5.094	16.592	25.931	-27.166	71.404
52.533	117.21	-133.169	26.84	22.005			17.859	85.419	12.94	43.314	41.132	30.4	-42.072	85.835
52.667	100.538	-133.12	156.939	50.327			113.032	68.523	3.436	74.433	1.997	6.359	-199.801	42.396
52.8	92.247	133.153	23.747	67.758			0.749	105.416	1.436	10.985	-3.332	0.371	-31.927	88.093
52.933	55.081	-132.906	9.771	115.925			-9.611	167.407	6.608	31.422	0.884	-7.564	29.532	103.584
53.067	95.245	133.557	-22.317	75.418			15.573	106.056	-17.367	10.087	2.34	-5.7	-4.35	107.715
53.2	61.636	133.133	186.469	68.456			3.545	78.926	43.661	-10.879	7.031	15.189	6.75	88.006
53.333	114.638	-132.941	-55.577	85.052			-93.659	110.342	-14.676	-105.966	6.801	-18.897	60.324	66.036
53.467	90.816	133.736	49.127	73.93			-21.556	138.951	12.049	-96.809	-13.001	-44.502	-61.744	107.389
53.6	98.596	-0.652	169.856	60.677			6.305	85.683	-20.075	-109.631	-4.896	-47.826	-150.323	25.384
53.733	88.307	3.017	5.035	34.228			8.708	111.647	16.307	-212.746	3.311	-140.294	-42.178	13.083
53.867	76.404	3.974	-118.741	134.136			32.771	81.758	-4.364	-190.913	1.338	-152.29	-108.705	101.596
54	76.277	3.689	-69.634	80.738			46.081	51.738	2.749	-206.728	2.726	-174.562	-89.38	90.806
54.133	97.976	-132.942	124.919	96.966			29.123	93.19	11.902	-212.57	-2.595	-117.564	-68.96	188.56
54.267	91.794	2.591	-25.718	66.489			5.067	44.552	9.468	-236.394	-2.546	-16.632	-32.132	139.677
54.4	117.316	133.011	104.801	227.272			30.721	83.96	-1.439	-164.81	-0.569	-67.275	-90.811	129.729
54.533	110.659	-1.665	26.204	-30.556			8.596	124.559	-3.355	-99.839	0.319	-105.427	-76.867	106.346
54.667	124.406	5.401	-5.225	92.826			12.233	121.046	7.024	48.94	6.303	-79.283	-67.532	44.529
54.8	58.195	4.811	4.343	52.123			3.54	95.861	30.965	-40.336	-6.398	-47.542	-98.663	55.761
54.933	54.209	12.473	-106.01	70.342			27.274	124.233	47.695	-68.058	-0.621	-12.771	-142.933	51.51
55.067	93.207	133.608	2.609	36.218			20.97	75.681	54.219	50.391	2.525	122.734	-158.59	59.91
55.2	127.273	-4.047	6.55	92.764			5.635	52.778	42.844	-5.062	-20.015	141.54	-146.4	82.143
55.333	149.158	-133.344	139.491	-93.01			7.196	23.457	10.17	-14.234	5.642	48.061	-116.678	19.225
55.467	118.08	-133.008	-27.149	23.854			-24.995	17.841	21.64	75.379	-1.954	59.939	-69.956	-16.888
55.6	111.646	5.381	69.004	74.09			-135.104	7.528	12.637	80.954	-1.948	62.914	-71.945	45.318
55.733	102.722	134.134	21.618	89.831			-171.426	3.757	-9.781	102.595	-1.051	19.218	-22.641	70.527
55.867	104.023	266.844	18.62	147.816			-158.294	72.589	22.538	110.551	-7.083	48.741	-22.348	21.147
56	90.551	132.911	36.889	120.662			-131.6	147.925	-4.252	105.188	-23.585	87.641	-33.464	41.608
56.133	128.815	0.12	9.589	140.083			-104.652	160.601	62.845	111.082	11.446	-65.275	-12.755	10.889
56.267	107.729	133.024	40.73	132.304			-76.249	144.656	6.878	96.577	-35.009	-8.645	5.414	-41.184
56.4	85.853	-133.059	15.495	76.805			-66.34	128.286	3.181	111.961	-28.967	-12.252	32.06	-45.138
56.533	94.739	9.1	41.927	129.503			-52.531	66.314	1.21	88.82	-30.178	37.555	-45.249	-117.574
56.667	92.826	-4.992	-16.193	82.889			-38.606	180.303	2.094	66.98	-8.215	105.362	-2.912	-86.48
56.8	123.166	-132.922	26.074	140.33			-74.973	138.327	-5.285	19.231	-26.704	85.858	41.831	-28.987
56.933	149.423	265.585	41.137	81.076			-78.676	131.643	0.521	20.396	-12.824	-11.153	133.531	-48.532
57.067	83.375	-6.533	-18.478	81.798			-81.19	122.296	9.188	15.301	47.978	66.932	154.038	-146.785
57.2	109.582	133.772	34.264	83.393			-57.121	134.028	-8.232	13.096	-6.393	93.882	184.421	-149.689
57.333	86.217	-132.877	-116.949	73.743			-95.071	-126.129	9.526	119.582	-119.178	40.585	150.759	-66.202
57.467	100.529	0.827	149.471	128.273			-123.287	247.083	-9.578	-110.254	-19.771	20.806	90.907	-25.653
57.6	132.794	4.487	-10.853	46.543			-23.557	123.309	2.772	23.935	-24.566	40.465	27.52	-136.968
57.733	88.242	132.871	-10.342	142.143			-78.706	-1.953	-42.428	41.39	8.463	12.452	64.952	-125.868
57.867	93.979	-132.961	16.3	85.651			-237.778	123.295	19.76	51.141	3.066	19.774	62.195	-103.297
58	121.705	133.054	-7.998	28.695			-118.278	123.148	-7.562	114.474	-16.217	31.97	36.162	-131.788
58.133	73.688	2.207	98.923	117.838			-106.314	-4.642	-3.874	110.214	-39.739	68.681	19.253	-139.183
58.267	83.922	-1.233	44.096	83.313			-64.093	6.993	-2.922	100.158	-44.261	50.965	-6.258	-57.211
58.4	69.986	-133.508	65.233	85.288			-20.709	-2.018	-0.383	58.379	-13.525	11.79	44.975	-54.653
58.533	90.342	0.454	18.273	80.089			-35.127	-4.563	1.978	38.404	95.03	85.516	66.592	-35.551
58.667	92.466	1.432	52.079	67.205			-25.108	0.536	-10.344	69.8	20.224	206.094	140.398	41.231
58.8	215.331	-133.259	60.436	61.301			-7.858	-6.765	4.932	115.531	-42.907	51.618	153.304	76.527
58.933	134.446	-133.205	15.139	65.343			-23.719	74.591	-4.823	34.147	11.899	65.098	59.882	102.99
59.067	141.305	-265.988	8.181	33.19			24.164	-67.05	-13.903	92.781	57.717	82.854	96.164	89.943
59.2	177.383	-133.375	-21.013	9.618			20.471	-73.802	8.522	69.578	-5.126	64.225	59.709	113.929
59.333	222.972	-134.334	-17.077	-16.383			7.864	-127.031	-23.545	84.339	-9.67	31.648	13.202	99.579
59.467	130.975	-265.815	27.896	3.03			16.023	-21.263	-7.232	60.532	-1.511	12.648	31.924	45.861
59.6	170.497	-265.574	-12.268	-1.872			24.781	124.946	-4.075	99.344	-4.093	47.84	36.248	83.437
59.733	130.554	-265.251	28.177	15.573			97.502	124.173	-9.198	54.628	52.627	162.163	-19.101	72.866
59.867	179.108	-171.663	-21.849	-4.95			-97.223	124.366	-32.565	58.988	-13.543	108.168	35.076	122.431
60	163.52	-136.135	9.053	-4.806			19.656	124.228	-2.042	118.418	22.36	114.325	-3.006	181.577
60.133	76.006	-41.648	-19.221	8.962			0.634	124.715	-12.077	-39.488	-3.176	82.468	29.527	88.719
60.267	93.361	-6.537	27.357	-11.069			-6.946	11.268	-1.28	20.141	-2.839	45.946	66.007	109.988
60.4	62.975	-157.106	66.562	14.949			-5.783	7.003	-15.984	24.929	1.999	48.266	135.443	132.216
60.533	60.191	-62.391	91.973	-3.938			14.26	-0.453	-10.505	-6.311	-12.101	69.289	152.491	114.553
60.667	24.446	55.43	36.892	-0.751			3.679	-1.158	-68.688	31.5	12.032	85.203	44.457	124.526
60.8	58.124	90.65	33.707	5.944			12.414	-17.501	-44.761	13.177	8.15	41.169	18.922	132.371
60.933	33.97	110.28	31.722	45.48			53.285	370.496	-17.478	37.98	41.414	23.919	99.463	124.566
61.067	-15.824	46.517	31.908	10.38			138.072	124.234	-20.593	66.784	19.816	22.395	-124.829	81.725
61.2	18.55	25.441	4.392	26.934			78.624		-56.466	31.932	-9.419	12.242	-37.559	102.232
61.333	98.413	12.909	55.804	24.103			90.749		-8.089	59.795	17.814	38.026	-28.939	47.882
61.467	116.027	-39.258	27.627	19.608			-104.593		-42.444	54.864	46.898	-2.684	-26.795	52.659
61.6	248.355	20.537	-4.208	12.784			35.003		-28.639	53.658	35.727	4.483	11.855	49.461
61.733	180.897	31.078	67.308	3.975			-4.637		2.465	77.768	-89.613	-12.654	54.573	10.599
61.867	102.171	-10.811	2.63	25.607			7.281		-31.092	49.942	121.004	8.514	72.835	19.783
62	116.582	26.764	18.858	62.567			-1.185		-13.132	34.102	-104.954	5.195	161.516	31.468
62.133	117.523	43.536	15.56	55.165			12.304		19.386	10.719	104.694	-85.39	148.418	16.851
62.267	37.371	250.17	43.763	-10.228			-21.28		-32.614	-12.028	21.432	-76.259	196.655	9.601
62.4	24.579	-126.808	19.15	34.206			11.116		-20.611	13.167	28.637	-116.795	89.738	-4.614
62.533	5.113	126.223	86.536	44.761			-0.285		-50.386	4.321	-7.512	-115.719	34.728	-22.022
62.667	-28.843	129.088	4.031	25.303			-21.579		-25.392	22.907	-16.379	-167.969	46.624	10.699
62.8	-171.553	11.833	-16.812	72.147			13.084		-38.187	116.976	15.527	-208.141	5.899	24.085
62.933	-209.095	-126.261	-6.523	34.896			-6.264		-17.342	-77.447	18.494	-251.172	6.954	59.362
63.067	-237.226	2.391	91.525	4.04			-6.054		-12.486	165.423	50.957	-206.999	-4.549	89.153
63.2	-285.386	12.366	-6.205	11.365			-6.805		2.197	147.217	50.421	-44.644	103.848	12.416
63.333	-319.034	128.838	16.896	101.865			93.057		-2.376	161.875	17.853	-58.611	-11.557	53.878
63.467	-308.617	-126.14	37.916	71.341			2.747		12.414	51.685	19.485	-21.093	-58.162	50.162
63.6	-166.977	126.691	43.675	85.815			-83.293		-31.936	47.336	22.364	87.646	1.294	108.709
63.733	-87.802	2.213	17.507	30.579			114.668	73.228	-22.124	88.167	-7.303	69.962	-10.225	101.853
63.867	-70.355	12.482	68.876	-7.205			-298.347	155.907	-18.364	15.641	21.572	145.299	7.164	127.602
64	-212.064	-129.285	22.611	-197.514			35.364	66.824	15.548	66.609	20.61	138.258	7.571	66.206
64.133	-168.643	16.066	48.72	-183.17			-271.652	27.805	29.764	117.813	27.668	231.096	10.682	37.173
64.267	-169.683	127.428	10.539	-141.137			-107.268	58.182	11.617	63.613	5.058	217.622	7.762	42.254
64.4	-34.483	-126.987	17.408	-176.945			-68.634	97.778	-8.183	95.902	9.063	166.051	3.482	22.552
64.533	-38.136	8.648	43.543	-199.79			-83.242	56.236	-6.273	62.049	2.938	117.722	-20.214	77.968
64.667	-33.548	127.608	35.78	-195.32			-72.565	16.876	-14.786	77.176	-6.242	122.678	94.227	65.395
64.8	-151.252	-127.376	-1.058	-303.922			-77.747	58.035	6.133	114.953	15.02	140.358	-95.34	35.349
64.933	-317.021	-17.581	40.929	-180.143			-87.101	56.984	-40.359	104.937	19.039	129.063	95.014	79.655
65.067	-174.873	127.915	51.684	-205.808			-82.152	80.892	-13.708	109.181	4.31	58.49	-89.265	102.074
65.2	-145.211	129.803	21.828	-206.424			-86.161	116.288	-10.484	65.331	15.575	61.105	0.607	59.971
65.333	-105.146	-253.141	21.862	-123.782			-74.963	108.034	5.067	94.176	1.753	101.174	-27.457	109.029	18.984
65.467	-162.749	127.093	30.615	-25.615			-58.414	68.59	-1.053	84.615	-11.047	92.865	97.716	49.683	117.941
65.6	-100.261	-49.714	-129.149	-101.536			-83.318	105.436	-5.976	51.311	11.798	88.946	77.389	43.741	117.746
65.733	-81.139	126.09	149.454	-296.055			-101.935	117.941	10.244	70.712	7.713	90.721	79.469	134.432	117.417
65.867	-39.769	16.505	-23.943	-25.107			-93.651	126.47	25.962	92.443	3.962	25.773	14.795	57.254	-18.102
66	57.728	126.347	-94.252	-136.956			-62.539	57.906	32.86	40.105	-12.113	-4.638	103.85	70.178	117.083
66.133	113.27	-6.483	179.009	-193.132			-73.097	-338.52	26.918	88.479	-3.497	23.766	81.638	51.924	-7.158
66.267	22.175	-148.02	-142.394	-4.237			-24.045	-256.099	28.321	-61.751	-28.642	49.408	102.678	86.525	-117.426
66.4	47.102	40.323	41.029	-28.093			-17.495	-34.17	11.149	51.702	36.19	38.359	7.17	51.599	234.222
66.533	119.928	257.335	132.419	53.597			5.564	-21.593	10.261	96.34	4.975	48.033	46.564	16.467	-234.595
66.667	70.897	-127.556	43.252	72.423			-28.43	-25.521	-6.799	88.302	-11.066	159.263	-3.754	-5.26	117.184
66.8	78.304	128.269	-11.365	105.81			7.966	-94.634	-5.658	42.621	-0.023	184.35	33.239	-21.195	-1.92
66.933	44.951	11.386	73.843	42.792			94.902	-94.515	-3.92	45.486	-14.481	98.138	17.505	9.324	-0.808
67.067	135.364	-108.732	-9.735	270.052			-107.077	-113.587	-8.562	51.866	16.887	82.353	38.365	29.949	-117.384
67.2	137.8	129.122	25.063	63.792			3.073	-263.453	-2.013	77.084	11.676	82.297	85.227	84.107	117.574
67.333	196.071	-67.428	-18.627	51.608			-9.812	-250.51	9.407	112.284	21.426	-18.901	98.32	93.918	5.788
67.467	126.282	36.657	10.179	-67.407			3.088	-224.845	0.472	103.913	67.52	133.199	221.982	118.403	-7.856
67.6	80.8	44.797	6.628	207.297			-12.191	-250.819	6.969	125.273	1.307	-57.117	48.957	38.302	-15.784
67.733	84.516	39.157	-8.261	101.202			25.081	-340.935	-3.542	48.071	-9.467	112.795	199.987	9.79	-7.284
67.867	148.427	37.01	22.39	168.421			13.846	-288.759	5.684	73.242	19.301	20.582	38.544	51.384	4.948
68	150.01	91.502	10.291	25.857			15.256	-368.584	2.969	236.525	6.563	-37.783	117.248	32.103	117.3
68.133	139.778	49.866	70.322	85.468			26.056	-109.219	1.202	-111.089	8.42	-51.809	131.085	83.102	-117.311
68.267	141.427	43.726	50.353	17.364			23.036	-215.73	5.768	87.19	-8.982	-64.922	97.241	62.111	2.045
68.4	69.91	84.248	79.853	209.054			-1.233	-207.06	7.094	63.738	1.144	-60.318	129.677	79.972	-2.64
68.533	91.599	124.068	24.19	21.399			9.008	-220.071	5.575	80.232	6.199	40.987	77.684	78.682	117.073
68.667	49.528	137.044	54.996	-272.678			36.651	-191.086	3.183	82.044	8.606	70.053	273.375	149.314	-4.319
68.8	95.205	100.919	35.394	-357.776			45.037	-132.336	19.923	56.072	-5.42	103.967	-18.019	119.229	-117.398
68.933	140.764	77.589	59.093	-211.701			93.37	-146.111	-13.048	55.431	-1.61	92.844	141.426	90.343	-3.744
69.067	83.679	105.343	37.957	-238.522			128.959	40.496	12.787	39.967	-9.336	153.728	73.499	135.071	5.953
69.2	121.957	68.246	37.266	-163.384			52.068	124.692	2.259	84.974	2.924	119.814	24.857	148.08	1.775
69.333	82.233	33.755	21.472	-53.453			-19.966	161.4	-5.888	55.353	6.052	166.958	3.647	111.347	117.963
69.467	116.612	115.08	-13.185	-100.829			49.387	169.903	-2.919	95.741	15.487	37.627	25.006	103.615	-117.322
69.6	183.713	72.84	11.355	29.643			150.256	248.109	1.32	87.46	1.772	82.008	-88.385	54.507	-117.094
69.733	133.791	107.032	-10.179	132.214			-58.147	-3.866	-11.373	82.649	-17.538	63.789	85.074	120.853	117.112
69.867	121.125	131.58	39.321	122.151			9.862	245.584	9.843	98.363	22.229	76.744	-101.956	-6.674	-1.104
70	109.047	109.239	8.896	191.568			28.197	-7.682	-10.016	85.117	-0.464	26.384	77.235	169.135	-3.668
70.133	146.215	131.554	49.05	103.087			36.015	246.041	-0.986	72.349	-2.352	-16.038	-4.247	95.405	234.406
70.267	128.094	121.901	32.698	154.196			156.734	245.764	14.925	28.684	7.543	-9.727	-208.555	136.56	3.689
70.4	119.143	82.943	-16.503	117.101			162.865	-10.022	14.188	64.134	8.695	-33.243	-324.076	110.669	-0.254
70.533	5.112	62.78	137.314	83.352			-139.021	123.188	-7.093	71.659	-14.133	-145.102	-334.017	90.242	-234.546
70.667	53.672	65.627	59.249	120.121			-2.543	-3.677	24.875	114.54	14.807	-194.857	-249.451	85.343	-5.193
70.8	30.944	104.251	-120.111	92.628			-14.666	122.064	-8.94	93.277	3.55	-255.785	-134.468	97.43	233.977
70.933	147.408	87.3	147.529	130.948			29.271	123.197	-7.698	188.89	-19.307	-333.843	-157.443	86.641	-234.615
71.067	91.105	83.587	13.654	250.139			-23.657	123.279	-0.866	2.935	20.242	-120.225	-229.74	132.924	4.488
71.2	91.028	110.203	35.199	137.087			2.929	123.17	0.83	60.631	-17.632	-92.951	-320.721	77.22	117.537
71.333	103.92	47.674	38.535	56.092			20.98	123.225	-14.977	87.849	1.439	-133.535	-328.267	108.874	-0.823
71.467	95.161	120.672	8.431	104.167			18.361	123.222	15.421	185.07	-2.074	133.988	-451.522	106.428	-1.309
71.6	44.255	18.322	31.402	-28.269			58.93	5.892	-9.219	-27.586	6.065	75.504	-402.892	132.926	2.933
71.733	53.445	70.146	66.12	-11.402			53.655	123.117	17.716	192.703	29.4	-10.936	-217.82	95.87	3.753
71.867	63.549	79.523	29.813	11.618			29.38	347.05	-10.592	104.443	-13.859	-18.827	-133.215	93.011	117.216
72	22.87	64.899	-98.6	47.356			75.571	45.353	-2.604	100.938	8.072	-8.487	-140.336	105.392	-0.797
72.133	34.743	85.488	116.782	57.923			66.038	53.909	-1.726	112.485	-10.945	168.846	-135.51	166.387	117.043
72.267	12.641	82.247	-136.266	251.402			57.504	69.594	1.765	110.599	12.977	260.294	-149.74	119.931	-0.693
72.4	57.37	45.231	117.437	91.946			25.75	84.488	-2.781	96.955	-18.06	176.249	-122.869	105.875	-117.392
72.533	87.005	49.543	31.527	125.722			63.954	155.483	0.957	113.599	-0.898	98.271	-160.21	139.715	0.548
72.667	39.973	27.174	27.077	89.825			78.543	75.313	9.094	91.647	6.356	150.338	-136.224	135.24	-1.257
72.8	5.138	27.788	36.529	46.343			26.253	41.78	1.153	-12.904	3.535	136.644	-138.835	143.256	116.963
72.933	38.585	12.162	57.621	7.377			42.172	53.747	14.584	81.826	-2.631	92.529	-33.074	85.52	-117.318
73.067	93.867	44.835	30.277	29.288			70.88	148.484	5.451	51.246	3.173	74.142	-67.394	81.71	-8.279
73.2	53.038	68.575	123.204	28.135			34.287	86.833	-11.673	60.104	-0.834	92.741	-89.995	124.497	-0.279
73.333	47.148	72.248	35.591	48.178			72.552	88.021	14.306	62.1	-17.128	31.278	-3.139	102.906	117.123
73.467	32.523	72.758	-114.544	7.383			58.406	57.105	-23.897	84.244	12.119	8.408	61.302	109.344	-117.369
73.6	61.126	53.095	111.869	36.752			30.946	99.772	19.859	53.896	1.091	27.207	111.558	93.425	116.879
73.733	72.082	51.634	86.74	15.641			80.554	47.587	-6.644	42.606	-1.895	-21.789	122.051	112.524	-117.387
73.867	184.183	27.366	36.487	17.953			48.172	40.271	-5.422	17.048	11.991	8.146	31.126	127.963	117.172
74	142.211	531.184	3.369	8.12			51.051	33.365	11.963	-2.52	2.679	21.486	95.334	160.716	-117.682
74.133	64.919	-77.649	32.63	25.488			152.475	60.678	-7.293	-13.916	5.483	-28.781	-5.505	145.988	-1.389
74.267	107.268	26.469	16.745	49.569			61.53	31.14	-5.683	-3.559	4.884	-53.477	87.26	142.476	-6.734
74.4	96.935	-426.23	-126.285	61.543			34.34	20.994	9.275	-13.414	-93.27	-82.155	64.949	154.079	-15.686
74.533	94.864	447.596	75.802	6.092			22.369	46.957	-1.569	-8.128	87.248	-36.727	71.849	133.912	-117.458
74.667	125.573	-437.291	21.28	18.714			52.713	-124.736	18.133	122.465	-14.702	-28.286	129.532	134.152	1.698
74.8	88.846	-31.981	113.86	23.077			12.867	34.223	1.602	-165.588	-2.84	-78.256	2.535	104.527	9.157
74.933	53.463	-40.115	7.931	99.587			-67.565	26.395	21.889	-16.324	13.972	-153.881	62.636	147.787	117.283
75.067	48.041	-35.341	-6.238	57.663			-216.19	80.163	-10.527	-4.066	-1.695	-275.365	33.666	137.039	-117.449
75.2	67.682	-26.455	-111.094	3.476			-305.476	-77.625	3.629	-9.337	-9.077	-291.623	68.202	145.835	117.707
75.333	-10.154	-67.312	105.051	18.254			-130.404	-116.15	-15.627	-10.039	17.444	-171.708	7.669	114.211	-234.612
75.467	-15.609	-33.479	-109.781	88.971			-185.007	-157.116	1.462	-7.462	-17.286	-304.642	54.279	154.148	117.472
75.6	18.745	-72.469	5.093	23.128			-145.878	-208.954	14.746	-3.037	-10.806	-213.1	-5.087	107.722	-1.673
75.733	85.174	-135.196	22.363	30.575			-160.68	-247.263	-17.388	-1.052	2.418	-132.734	24.346	163.498	-2.079
75.867	27.228	-165.113	-5.495	8.142			-190.752	-313.337	0.394	-11.023	-10.741	-24.378	-16.015	131.474	-0.354
76	-65.958	41.914	5.149	4.844			-185.586	-372.711	1.918	28.097	21.918	-63.448	45.67	153.458	-234.49
76.133	-75.287	-251.21	42.573	12.928			-165.923	-174.655	15.083	-34.953	-8.155	-39.036	104.984	151.094	117.434
76.267	-157.778	-126.349	13.837	26.156			-111.472	-300.39	2.334	-28.965	0.572	-50.638	24.652	131.769	117.618
76.4	-199.488	-251.575	173.543	9.418			-58.588	-247.471	-33.639	-5.564	0.14	-14.329	-93.685	167.631	-118.107
76.533	-273.431	-125.817	-138.654	24.224			-81.274	-199.352	45.424	-21.575	-0.483	133.526	4.998	146.628	-117.239
76.667	-204.108	-252.065	115.998	3.266			-54.227	-274.225	-9.513	-9.593	14.293	11.909	99.03	114.819	118.542
76.8	-164.663	-251.642	-15.711	-3.149			-74.501	-285.972	4.057	-51.586	-98.394	19.584	83.814	158.857	-117.383
76.933	-80.626	-251.531	31.074	34.668			-95.997	-235.012	-0.937	-33.015	107.077	99.322	110.26	75.926	7.554
77.067	-101.963	-245.388	92.022	5.021			-133.845	-226.565	10.242	-181.507	0.637	-55.253	108.145	129.261	-117.46	25.271
77.2	-18.874	-188.94	-45.731	-9.68			-95.51	-264.907	-8.48	-160.592	-6.552	15.473	25.545	108.378	-3.092	107.47
77.333	-33.608	-561.305	196.892	16.993			-50.59	-123.817	-9.644	28.353	-83.982	101.355	-6.509	194.48	119.063	109.047
77.467	28.469	-44.668	-85.937	-6.166			-26.324	-377.003	17.931	-190.632	85.157	120.275	27.304	169.775	-118.847	9.4
77.6	28.453	-41.576	57.081	-17.856			98.02	-121.826	-6.764	-83.078	0.3	252.688	-59.791	181.951	7.7	-6.441
77.733	103.255	-17.357	56.438	42.006			-26.593	-65.963	1.832	-212.13	-21.273	109.443	-9.454	203.806	5.795	108.407
77.867	111.738	-65.911	15.903	-8.941			62.184	-32.549	-2.622	-155.449	6.272	156.551	-7.695	118.096	-3.661	-0.129
78	134.801	-12.458	9.761	35.628			78.663	115.696	18.725	-175.403	15.016	233.298	124.586	140.334	11.382	-9.366
78.133	79.155	-32.939	52.595	36.679			-28.255	82.113	4.951	-110.44	-12.788	217.267	80.304	138.225	-116.426	214.915
78.267	79.09	-12.603	26.987	8.899			33.784	92.006	-0.618	-99.945	3.075	180.897	130.296	128.115	118.432	108.007
78.4	54.262	-16.728	44.845	17.09			-7.9	99.581	14.69	-71.885	-103.254	105.916	74.236	150.654	122.719	12.519
78.533	100.984	-9.744	128.208	17.436			15.501	105.917	7.736	25.832	0.742	138.994	85.392	151.414	-117.751	109.526
78.667	104.815	100.882	70.691	-35.606			-5.231	122.262	-1.405	-11.823	3.774	116.944	143.903	156.232	238.226	107.827
78.8	91.706	13.036	6.197	-54.403			27.486	146.612	-1.953	-39.475	-7.115	47.81	120.895	106.534	-115.853	5.853
78.933	173.396	62.601	-128.334	-150.306			-18.489	124.19	-18.661	13.412	120.248	93.75	156.3	137.69	30	-107.367
79.067	98.707	-27.965	-31.288	-209.066			18.069	123.43	12.868	66.331	-0.685	86.819	141.9	134.856	27.354	107.522
79.2	72.13	30.847	156.623	-168.872			-0.341	-5.316	-26.048	95.674	-5.384	39.467	181.725	117.603	6.195	107.298
79.333	106.369	-28.986	-4.08	-107.281			4.161	2.319	25.992	37.455	-11.868	66.493	190.178	80.256	-128.954	21.835
79.467	116.889	-3.379	47.213	-63.88			59.207	121.467	-13.013	51.357	-12.85	40.785	148.212	115.643	17.001	107.289
79.6	88.205	-22.248	-98.546	-107.76			-6.89	121.272	12.821	16.306	-3.894	87.839	157.176	98.047	1.996	240.405
79.733	92.749	28.788	146.897	-117.832			-10.271	242.205	-8.472	27.978	2.861	102.038	116.695	47.947	26.895	229.725
79.867	96.399	-2.6	104.04	-175.815			-8.11	241.596	16.979	26.434	-2.3	68.69	73.246	137.671	32.177	93.64
80	57.199	19.05	49.732	-217.88			-1.342	-8.149	14.13	-19.64	-11.865	104.64	53.783	123.703	-11.321	182.36
80.133	47.877	-73.274	39.506	-115.693			-75.577	121.306	-6.497	26.713	-8.641	78.977	59.535	110.546	1.622	-98.526
80.267	43.505	-3.554	17.498	-89.204			109.903	121.201	1.462	23.199	-12.616	125.24	70.711	117.022	-5.347	95.753
80.4	43.621	224.592	-102.139	-156.363			-8.092	-12.394	8.19	11.579	-4.56	127.466	81.846	213.547	-9.471	24.645
80.533	56.534	32.562	108.726	-231.288			-1.273	121.788	18.762	33.408	1.568	113.653	47.439	113.342	5.191	-59.238
80.667	3.972	25.411	19.119	-149.585			5.042	121.663	-1.01	-7.607	-0.795	131.043	73.901	125.728	23.375	71.302
80.8	69.116	-299.357	-98.145	-184.337			33.933	0.421	-14.074	16.094	-3.922	75.996	165.172	65.357	-5.151	5.577
80.933	53.944	45.69	178.614	-82.678			-26.529	121.178	-6.087	8.013	-11.018	122.869	114.357	118.619	-10.101	3.3
81.067	140.985	-4.278	61.412	-74.874			-111.924	121.306	4.219	44.478	-36.112	182.976	113.52	2.892	16.546	8.232
81.2	109.341	237.683	68.778	-32.887			33.829	121.806	3.061	50.537	-27.818	168.945	110.032	141.145	22.824	-18.746
81.333	-10.605	118.532	52.136	30.775			123.939	-12.106	4.565	18.829	-96.965	134.658	-20.891	15.714	-17.04	114.813
81.467	195.958	145.505	38.349	-90.973			-88.708	242.055	-5.503	35.373	-100.155	115.698	93.561	78.609	21.126	46.791
81.6	66.675	42.011	14.701	-179.11			156.206	4.586	1.847	25.296	-94.506	84.158	57.905	93.202	15.256	26.893
81.733	-11.584	36.314	7.252	-272.866			-78.317	121.187	3.512	-5.446	-107.779	112.825	25.469	111.384	-18.919	-15.749
81.867	31.433	103.698	31.25	-200.467			70.868	121.218	25.337	39.117	-109.939	163.642	59.33	125.502	-6.919	41.34
82	75.794	144.426	-97.139	-189.893			111.989	-2.462	2.654	11.701	-154.466	176.287	148.102	78.133	14.163	-31.487
82.133	100.085	147.032	118.973	-166.735			130.809	8.072	-8.89	-24.8	20.748	236.409	217.441	96.418	11.28	-95.456
82.267	84.608	62.081	13.621	-108.961			94.445	12.792	4.87	8.618	-108.941	12.772	121.488	95.297	-3.316	-229.865
82.4	85.476	59.441	-10.723	-104.363			100.126	329.912	14.49	-10.398	-8.817	250.365	105.929	120.057	28.885	-127.072
82.533	42.671	169.136	-16.328	-59.144			140.251	108.622	3.387	9.289	-2.409	18.356	19.504	132.438	7.493	-185.898
82.667	22.496	61.529	-24.668	24.667			45.23	76.939	-19.151	13.638	2.722	97.673	75.734	155.592	0.986	-236.78
82.8	110.229	50.116	-25.479	113.712			130.166	96.668	16.884	2.689	-38.459	151.777	112.034	112.054	126.85	-174.766
82.933	79.056	114.815	-86.676	239.127			107.514	142.757	-20.608	27.305	-65.834	125.948	107.094	86.327	-75.133	63.002
83.067	69.106	38.301	-105.25	164.083			109.533	78.163	1.238	19.587	-41.253	142.256	77.203	114.388	-4.472	-26.691
83.2	117.564	15.414	-78.823	112.451			99.112	129.098	16.491	-0.96	-9.88	146.476	59.63	174.556	73.215	-5.654
83.333	77.3	54.882	-82.85	150.756			78.316	106.055	-15.88	17.424	-25.753	116.903	198.181	120.073	7.076	15.308
83.467	59.048	72.37	-117.319	115.658			9.935	61.855	-0.427	30.39	-27.06	183.295	90.447	88.02	-66.173	45.948
83.6	58.838	114.529	-80.455	8.237			50.413	57.788	17.05	48.538	-35.61	104.112	-36.829	132.66	4.507	45.925
83.733	73.725	81.931	-44.517	90.714			-16.199	119.787	3.656	72.789	-37.381	100.963	28.786	155.701	13.663	26.799
83.867	58.341	25.66	-99.249	110.921			138.273	116.096	-13.262	95.327	-12.647	121.54	8.938	97.03	98.663	23.52
84	-2.515	73.372	-152.737	74.463			-71.39	129.503	13.764	83.088	3.729	108.737	-8.509	133.305	-33.792	224.24
84.133	103.886	72.69	-145.769	15.232			28.866	22.35	-16.707	12.552	4.275	161.748	257.873	63.185	109.572	-47.881
84.267	44.314	35.222	-146.479	89.852			106.995	128.579	19.225	21.383	20.995	91.335	105.396	70.379	-20.423	143.114
84.4	160.242	254.07	-86.788	-130.615			16.024	-26.835	-3.181	32.162	-11.49	123.64	135.019	32.928	-10.156	91.071
84.533	168.765	-135.817	-53.595	53.596			-26.863	119.153	-23.368	60.238	2.342	108.662	58.85	32.984	15.904	74.14
84.667	83.363	97.766	-30.501	10.812			90.331	29.743	17.717	32.719	-5.184	163.743	93.439	53.254	-1.497	47.826
84.8	78.321	66.8	-12.644	168.194			-91.113	29.143	-21.513	38.37	-8.173	165.974	63.192	123.173	-80.959	8.586
84.933	81.622	-30.119	31.969	20.031			78.142	-63.742	8.546	4.785	8.193	132.919	75.94	174.651	-5.946	99.272
85.067	40.062	126.375	117.605	23.553			112.555	74.622	-0.899	-3.278	-3.015	164.418	32.275	160.296	30.042	94.112
85.2	57.955	-0.505	109.642	13.73			-84.584	100.088	-1.455	36.612	6.574	129.616	-8.833	112.552	-19.929	104.276
85.333	25.978	-3.591	-21.819	32.145			155.713	117.641	20.905	50.106	-12.353	161.266	122.568	122.896	-123.495	225.668
85.467	58.753	253.119	110.049	24.132			-101.413	104.749	-18.945	62.959	9.458	78.355	65.872	125.608	201.24	33.901
85.6	18.915	693.776	83.434	60.893			14.222	92.56	16.615	51.316	-10.957	150.03	-18.57	110.403	66.464	100.102
85.733	51.149	-691.541	72.76	35.248			-2.648	60.111	1.042	18.288	12.17	122.211	63.059	115.95	-54.14	107.55
85.867	10.279	135.599	39.121	-93.204			-8.426	77.111	0.127	47.957	-18.733	95.555	149.442	141.251	0.681	71.228
86	27.203	-17.404	72.673	39.464			2.765	20.449	-9.637	39.629	-2.857	74.647	108.92	150.872	40.048	106.347
86.133	40.289	605.497	86.456	-23.562			-7.551	24.729	13.843	16.474	19.884	89.469	133.232	121.597	1.284	94.299
86.267	103.276	157.904	55.177	27.85			-12.646	64.734	-3.285	-1.627	-16.913	128.127	128.51	111.058	-17.472	55.206
86.4	140.296	15.404	92.364	16.415			125.967	37.021	-2.005	14.077	5.59	77.335	69.823	112.148	67.512	112.037
86.533	159.595	-453.236	60.664	-4.221			-7.373	-20.507	2.202	-1.459	-3.772	115.131	28.554	145.772	-23.812	94.902
86.667	131.771	66.714	60.406	-2.159			33.504	53.498	1.852	53.164	17.03	98.216	122.501	103.62	-121.997	230.939
86.8	97.655	36.762	35.706	-56.251			53.503	69.127	10.056	55.147	59.653	69.284	32.785	157.914	240.003	-52.884
86.933	87.578	23.223	67.752	-212.235			14.087	68.608	-12.479	106.968	-56.596	90.564	117.176	145.706	20.542	55.884
87.067	72.029	5.473	66.815	-45.432			-93.351	64.609	-0.884	91.071	12.949	100.407	238.823	115.553	-13.281	100.022
87.2	52.399	23.165	100.88	-137.152			-13.756	67.998	1.26	62.489	-4.169	116.199	151.956	109.713	20.581	105.212
87.333	11.254	85.297	62.456	-164.641			19.814	84.609	-1.238	-3.775	36.266	74.55	92.8	133.774	2.612	80.109
87.467	36.813	67.419	-46.084	-149.151			2.04	97.557	1.577	42.162	17.022	71.564	132.244	84.587	-66.936	189.035
87.6	47.396	68.582	122.857	-151.874			19.345	100.448	-2.529	23.138	9.254	63.751	96.602	91.775	-73.08	122.268
87.733	92.809	92.109	49.757	-170.511			70.355	105.21	8.018	88.769	16.916	95.611	3.243	134.492	-26.114	77.899
87.867	74.661	71.76	20.649	-101.135			54.553	124.885	-3.918	97.856	7.036	78.185	134.322	110.526	-66.352	127.229
88	10.228	89.115	15.572	-273.08			41.38	118.948	2.939	106.575	12.288	103.177	23.448	128.54	-120.634	27.212
88.133	195.029	-52.908	4.727	-93.658			50.355	55.207	12.265	94.476	-11.451	68.715	-25.587	114.012	63.866	70.4
88.267	78.362	-3.248	30.819	57.588			18.637	98.815	-13.535	54.51	62.627	220.461	129.01	97.726	178.928	75.442
88.4	99.071	55.355	6.709	42.973			58.185	93.989	0	56.553	95.225	128.794	13.322	73.405	154.248	92.635
88.533	99.983	102.843	-101.779	177.854			194.73	93.345	-1.989	57.046	-37.91	149.45	53.55	105.915	28.619	103.474
88.667	88.948	130.179	138.796	56.659			58.743	83.67	8.408	32.161	-3.954	142.942	80.731	121.416	21.879	56.603
88.8	87.588	97.37	3.378	199.986			77.793	162.763	-9.739	13.74	5.538	185.427	88.733	144.528	-18.964	56.518
88.933	47.251	56.821	-101.963	162.072			58.962	126.912	7.541	35.278	13.601	85.508	73.522	80.458	-43.757	37.271
89.067	70.101	43.304	25.131	100.615			58.931	112.043	0.688	29.864	6.438	97.464	76.074	149.957	-17.421	54.418
89.2	50.474	57.641	-14.243	225.598			98.475	74.109	-5.627	24.862	23.493	93.419	186.587	103.119	63.347	58.377
89.333	-17.626	124.25	13.275	168.77			-10.72	48.535	5.407	-29.797	1.04	78.116	-124.806	111.67	242.523	228.57
89.467	189.704	-73.958	107.463	141.58			23.242	31.326	1.226	-41.038	20.493	121.045	212.979	147.043	106.372	-175.042
89.6	91.134	199.087	-128.265	132.8			2.394	83.029	6.152	28.712	13.919	204.177	57.176	192.495	87.928	166.267
89.733	61.627	69.554	-5.624	74.628			-29.602	47.27	17.172	80.082	4.068	209.554	-65.051	75.045	105.333	41.212
89.867	28.146	65.413	121.934	200.715			95.64	11.002	-7.632	17.791	17.313	72.922	32.213	176.55	88.89	67.951
90	33.153	37.61	-133.839	179.7			104.256	11.593	-20.562	57.415	126.856	80.114	74.26	141.239	14.491	111.594
90.133	60.747	35.985	63.977	178.964			-15.352	19.767	19.082	77.001	-73.417	11.817	58.329	220.452	-10.83	71.32
90.267	87.296	21.764	26.201	174.557			51.946	6.346	-36.406	108.37	10.971	18.849	157.176	40.348	33.93	36.318
90.4	115.282	59.473	-30.779	84.913			28.46	-37.508	36.308	102.87	25.049	-26.926	46.283	125.912	14.724	87.137
90.533	141.685	-8.499	-17.021	133.873			24.082	125.152	1.735	137.677	6.781	8.471	-52.628	134.729	-5.87	81.244
90.667	131.02	32.445	11.496	119.952			32.103	-31.631	-4.674	64.536	-2.576	19.92	122.633	78.792	20.882	118.344
90.8	118.183	1.516	8.091	52.319			-23.666	66.824	-4.481	31.117	50.465	2.323	87.857	108.733	31.002	89.387
90.933	65.354	20.343	-95.626	124.064			31.846	68.611	-1.186	11.924	95.247	113.926	62.058	75.953	-1.381	115.344
91.067	42.168	-20.104	-20.34	74.018			-1.812	13.654	0.4	17.47	-16.652	-23.596	55.265	115.758	8.703	110.257
91.2	71.196	-79.059	-12.107	67.515			-13.315	-17.683	-19.445	-12.904	78.505	-41.248	81.216	107.924	2.027	48.834
91.333	30.477	48.759	-4.369	111.064			-4.887	58.036	4.485	11.049	-13.711	-60.151	98.164	59.249	-13.323	73.597
91.467	64.753	-120.761	6.647	97.233			21.256	49.603	16.25	102.017	20.901	-197.151	97.87	90.271	-1.541	-39.422
91.6	113.239	-138.219	147.165	47.742			23.286	-30.015	6.257	7.534	38.462	-88.313	105.032	109.854	1.999	97.905
91.733	70.588	-326.848	31.754	32.333			-54.835	46.686	-4.813	-61.072	96.473	-52.332	44.788	109.091	-70.77	32.185
91.867	47.259	-288.93	-10.869	40.807			-80.068	93.847	-13.844	-21.562	-1.676	3.475	73.982	139.223	-97.826	-27.682
92	14.719	169.205	35.125	57.994			25.11	198.964	18.639	-4.263	13.697	-41.654	64.286	117.368	-186.7	19.044
92.133	133.077	-184.434	-11.106	86.532			-14.585	56.596	-15.42	33.929	9.439	-17.15	69.944	77.217	-154.105	43.152
92.267	82.133	-613.878	28.933	127.683			-7.156	84.224	1.068	17.961	-95.094	-55.666	34.915	92.036	-211.493	8.568
92.4	194.782	-91.713	21.559	70.757			2.816	129.141	-3.163	3.962	23.35	-12.178	38.57	128.859	-253.491	39.46
92.533	-47.139	503.673	19.968	117.16			12.234	-47.016	-19.392	-10.676	7.184	74.153	106.611	120.142	-219.893	50.246
92.667	166.651	4.556	53.606	59.487			-4.097	18.348	2.041	-27.925	12.193	78.485	78.074	98.974	-187.544	62.947
92.8	145.619	-24.186	17.031	63.734			16.999	-30.802	6.715	-101.293	27.612	74.377	96.883	124.38	-131.074	111.418
92.933	220.7	27.244	-2.742	131.286			-7.438	42.513	7.633	-126.672	-12.078	72.067	133.011	101.419	-76.528	5.57
93.067	-41.96	41.557	4.75	43.986			-3.012	-26.288	-2.412	-133.019	16.947	18.728	63.121	82.543	-49.939	55.064
93.2	183.987	-16.434	14.133	36.221			8.704	105.778	6.813	-119.515	15.355	40.673	232.417	112.714	-53.132	78.887
93.333	6.967	166.581	-24.109	35.543			-8.897	-43.074	15.09	-136.86	-5.021	-26.344	8.266	65.989	-107.536	17.555
93.467	85.215	-26.095	-47.873	38.806			60.333	92.754	1.171	-166.302	13.963	26.514	205.373	75.168	-82.789	34.78
93.6	-47.689	52.418	-35.183	55.968			-71.08	25.377	-34.4	-180.376	29.526	27.042	110.201	65.8	-113.766	-7.729
93.733	88.682	-29.629	-24.623	41.786			-239.097	-75.331	32.44	-158.817	4.331	1.694	123.212	-13.285	-90.58	60.091
93.867	92.084	-9.49	59.398	8.969			-154.93	16.609	-32.413	-187.907	14.641	-8.928	146.824	19.971	-71.693	-11.823
94	150.422	94.463	93.197	-39.447			-163.79	92.196	17.533	-192.438	-8.182	13.587	10.67	37.272	-38.242	132.5
94.133	63.222	15.017	45.949	6.252			-17.444	35.723	-17.676	-124.673	1.306	3.858	214.155	146.649	-34.084	-3.604
94.267	29.529	13.946	71.868	-43.251			-187.424	65.806	18.808	-123.9	1.08	6.502	104.755	48.411	-3.255	51.415
94.4	38.333	5.864	21.147	120.42			-72.507	-46.254	2.06	-84.747	-1.115	-7.708	11.803	85.981	61.598	38.68
94.533	7.598	4.51	-34.621	298.83			-288.204	61.182	-7.911	-45.689	0.276	20.056	186.255	42.327	28.423	199.694
94.667	-131.163	-54.376	-35.253	86.973			-148.046	116.159	20.045	-7.88	71.622	-13.588	124.212	9.244	7.871	50.599
94.8	48.866	-13.262	49.03	66.477			0.959	17.874	-1.51	1.643	13.967	6.369	121.17	73.301	-31.668	156.233
94.933	-108.426	-72.245	-16.113	-27.183			-77.798	21.13	-2.538	8.554	-7.523	2.008	163.56	-3.725	13.559	7.369
95.067	-280.896	16.754	-24.296	156.739			-25.389	92.041	-25.501	-6.458	-1.875	26.106	255.23	20.274	52.212	209.778
95.2	-344.414	-53.713	39.294	-76.203			-149.062	24.042	6.889	9.192	-2.447	-8.768	78.819	9.102	127.177	148.634
95.333	-289.911	28.644	32.163	-8.102			-160.083	-66.24	-10.283	14.583	-72.549	-24.377	127.225	-10.886	176.608	106.652
95.467	-195.417	-56.228	-21.49	35.736			-106.963	26.456	-1.672	-47.665	58.301	27.183	16.573	17.859	94.592	113.916
95.6	-273.076	-80.095	40.272	104.687			-152.79	19.406	-48.442	54.445	12.067	16.538	106.634	-39.397	94.703	36.255
95.733	-255.001	-129.397	41.622	15.716			-118.445	-3.705	-40.978	-8.371	-10.232	63.746	30.536	-82.083	54.104	60.679
95.867	-225.757	-776.716	13.795	30.748			-119.095	-27.409	-65.498	31.823	4.586	102.288	69.872	-158.49	57.495	48.857
96	-388.196	-130.93	62.626	-117.996			-22.208	-123.324	-19.34	8.567	-66.137	106.479	-1.585	-179.479	89.438	115.12
96.133	-105.844	-256.699	5.237	27.722			-95.443	-39.298	-65.9	-3.297	11.476	80.371	125.51	-211.995	58.136	58.774
96.267	-79.674	-410.836	-11.388	-13.708			-58.45	-156.655	-11.935	50.7	62.053	176.003	-17.497	-299.468	62.181	93.603
96.4	-210.51	-237.967	12.549	30.433			-232.524	-277.747	-18.904	29.109	-0.464	98.267	6.181	-385.819	39.198	179.243
96.533	-127.986	-156.472	-2.102	92.087			-176.03	-81.348	-48.595	39.359	11.222	64.746	31.873	-292.884	90.148	150.835
96.667	-118.046	-224.575	-16.054	-48.463			-142.526	-251.555	-28.905	61.207	26.28	77.897	70.821	-161.791	45.273	174.565
96.8	19.378	-226.167	-68.892	-49.802			-96.547	-179.975	-35.48	82.095	1.508	62.903	71.964	-147.464	28.101	196.586
96.933	41.085	-165.01	114.868	-44.746			-127.812	-167.818	-32.219	132.104	0.918	53.305	88.853	-141.043	26.439	167.418
97.067	84.688	-92.238	20.469	28.358			-129.659	-158.543	-8.868	125.481	-1.028	53.354	90.301	-166.392	32.981	42.856
97.2	-70.244	-22.18	-2.484	49.549			-101.353	-133.378	3.749	103.287	5.536	44.292	28.477	-291.741	10.578	199.505
97.333	-50.458	-37.562	5.574	46.23			-92.676	-182.406	-13.647	172.905	7.612	75.903	9.19	-105.875	14.316	226.851
97.467	-62.156	-71.832	6.386	79.713			-97.232	-185.848	-21.975	110.971	2.077	15.386	260.556	-127.656	4.84	5.33
97.6	-138.031	-138.659	-110.17	60.396			-26.298	-180.468	-26.524	85.307	-3.565	78.783	-48.996	-56.09	4.459	99.859
97.733	57.362	-110.535	132.438	68.3			-60.169	-269.324	-18.824	82.595	9.476	38.679	92.168	-78.806	19.099	-11.745
97.867	-118.727	-124.581	-12.884	101.662			37.229	-370.304	-2.342	43.587	-3.855	19.673	202.522	15.117	-9.002	24.185
98	-20.466	-89.298	-4.193	103.045			-8.397	-144.068	-21.36	58.427	4.922	4.382	18.88	-9.234	25.854	-6.379
98.133	-24.04	-34.232	7.193	99.609			20.489	-193.474	-16.357	66.208	-55.601	-30.476	103.573	33.934	-23.748	101.532
98.267	-15.417	-12.011	72.634	41.884			12.645	-123.051	3.996	89.19	4.635	-100.269	107.936	9.93	-14.068	194.694
98.4	21.109	41.824	-19.515	99.04			-1.045	-117.724	1.534	73.707	3.921	-150.351	107.212	-13.03	15.285	86.511
98.533	94.563	-10.542	-11.409	81.305			-26.677	-108.888	27.273	81.821	6.502	-229.526	143.406	96.174	-14.046	74.167
98.667	-106.772	44.821	-0.447	79.431			-21.551	-115.793	8.415	125.918	14.171	-292.416	126.878	48.517	2.688	114.192
98.8	-13.136	27.809	14.288	118.029			-115.591	-136.084	-14.751	84.503	-23.699	-267.761	114.917	42.427	-19.935	-79.211
98.933	-41.192	141.537	-3.139	74.31			2.319	-140.933	21.76	95.479	-3.248	-167.534	168.542	89.603	24.908	19.973
99.067	-21.767	42.849	-107.534	64.155			153.413	-163.498	-1.271	102.017	25.738	-81.462	70.68	91.312	-1.429	69.361
99.2	-12.253	-50.69	74.955	122.637			-105.538	-156.725	2.842	64.829	-21.157	-110.084	115.382	107.529	4.681	35.289
99.333	-39.689	-14.412	-133.751	31.389			127.616	-191.951	-19.673	55.923	1.582	-60.729	110.169	23.226	-3.558	73.125
99.467	-35.286	-6.955	-125.865	75.613			-120.544	-264.766	7.43	86.927	15.681	-126.379	64.78	-7.904	-6.402	77.646
99.6	2.029	97.317	-207.391	36.243			-16.353	-286.703	2.323	90.819	3.756	-92.591	44.875	43.401	65.669	83.674
99.733	-55.483	49.379	-40.737	71.659			144.668	-238.294	-5.768	73.052	-7.69	-103.864	44.762	15.003	25.333	112.652
99.867	26.418	-21.479	-140.064	64.037			25.177	-406.862	-1.829	42.063	-1.413	-117.783	118.328	31.143	5.424	85.16
100	80.319	3.984	-237.677	-72.143			-49.901	-280.974	19.526	41.774	9.522	-187.564	32.081	65.645	23.9	114.598
100.133	199.821	45.819	-257.615	85.695			79.914	-151.058	-12.48	35.976	-9.06	-163.135	375.298	123.686	11.279	-11.225
100.267	158.383	73.62	-32.634	24.324			49.398	-114.963	11.905	3.636	12.587	-152.018	130.419	34.298	-30.377	66.705
100.4	74.672	6.348	-64.505	55.318			90.155	-139.344	16.697	15.402	-12.729	-63.852	101.294	20.411	-17.833	66.102
100.533	47.658	-5.996	-104.644	46.225			62.368	-93.117	-18.868	12.514	1.611	18.448	74.746	-5.27	3.286	-10.039
100.667	10.05	26.624	-86.579	68.286			79.575	-25.804	18.607	14.215	27.098	92.501	116.694	70.564	-31.82	31.709
100.8	12.244	-17.981	-138.912	-5.736			85.286	20.795	-4.632	-12.834	0.64	128.17	105.161	71.031	-316.391	121.325
100.933	-28.513	-4.856	-110.162	31.461			40.619	-62.012	-1.273	12.872	-1.071	76.613	229.877	106.825	-144.207	43.746
101.067	14.661	56.24	-93.599	49.29			32.194	29.522	2.225	14.674	1.92	5.833	-15.723	66.332	-23.743	73.137
101.2	-103.906	8.436	-174.01	172.518			35.107	24.864	-4.934	-8.952	-9.133	43.843	12.827	34.637	-10.612	121.633
101.333	-205.574	-21.898	22.67	101.264			92.676	-124.147	-2.368	14.05	-1.129	36.927	3.942	46.815	27.837	118.655
101.467	-241.82	15.452	-178.185	75.598			81.24	214.526	5.447	25.204	-5.534	-11.466	189.614	60.898	58.007	-62.689
101.6	-217.962	-7.376	-58.735	-81.82			106.986	64.347	1.315	-17.563	-11.253	-19.73	-105.848	117.003	-85.441	43.741
101.733	-274.201	-10.568	-20.082	34.704			118.059	41.75	-2.934	-7.434	16.487	-16.565	179.428	116.931	93.722	4.321
101.867	-294.612	35.085	31.889	2.335			62.618	10.159	12.813	-1.032	-2.111	-68.619	34.773	106.342	9.998	-50.607
102	-329.795	16.216	-15.18	103.352			7.887	36.265	6.572	0.805	3.028	-74.324	5.833	26.73	6.29	-37.076
102.133	-281.288	-15.171	-54.496	15.707			47.857	47.633	-4.676	-24.796	-11.186	18.457	-105.633	17.149	-14.396	-1.189
102.267	-257.65	-22.746	-25.579	-86.904			29.916	111.217	-3.952	12.249	4.116	-84.552	-43.862	11.032	28.153	-41.315
102.4	-92.339	122.892	-63.298	-9.933			26.491	43.867	-9.103	9.794	24.038	-102.593	-84.388	31.177	-19.804	-88.868
102.533	-87.74	9.022	94.235	-35.404			78.591	-5.161	1.905	14.674	-5.841	-155.165	-126.182	88.703	-13.257	-204.64
102.667	-8.517	34.905	-114.222	-72.494			40.952	3.939	-4.305	61.814	-9.836	-229.743	-246.508	73.235	6.642	-228.318
102.8	-20.92	18.96	11.456	-128.164			52.086	3.588	-17.84	32.281	-1.859	-268.407	-123.552	-7.812	27.336	-221.835
102.933	-26.285	-29.532	90.887	-118.599			92.011	122.625	-45.447	68.392	10.038	-245.94	-216.542	-33.244	22.764	-213.856
103.067	-24.338	65.111	257.717	-118.243			35.977	245.419	-72.098	58.127	-3.211	-82.73	-219.111	0.797	8.594	-234.008
103.2	27.333	-39.028	-13.541	26.337			-2.829	137.363	-32.087	84.685	-8.4	-74.571	-208.267	21.012	16.863	-350.763
103.333	123.05	54.22	-145.471	-97.819			2.679	122.264	-26.105	46.055	1.354	-61.935	-188.095	-17.855	10.811	-254.145
103.467	28.907	84.616	248.258	-129.007			2.965	31.429	3.925	54.572	-2.008	-64.988	-126.519	29.873	47.597	-252.413
103.6	92.037	21.196	61.775	-141.337			-28.288	90.848	-3.412	40.159	1.212	-151.123	-212.978	73.336	44.48	-292.365
103.733	55.766	46.635	53.023	-175.203			-35.786	99.114	-0.643	8.5	6.426	-107.353	-94.214	117.158	44.562	-271.289
103.867	54.395	122.511	-50.501	-177.199			-41.826	118.828	-30.266	41.078	1.372	-88.361	-82.991	76.473	48.917	-196.084
104	127.119	89.167	154.141	-176.39			8.092	124.752	-11.974	120.74	2.527	-97.32	-122.079	34.36	32.732	-169.632
104.133	203.552	44.322	-165.982	-166.444			-10.015	201.71	-16.866	-108.21	-0.268	-112.281	97.648	33.596	-12.697	5.489
104.267	117.544	45.83	24.566	-165.841			-6.264	153.972	-3.966	35.323	0.357	-197.446	39.276	8.57	-1.508	56.53
104.4	183.163	66.236	-68.016	-156.065			7.284	83.06	-10.591	82.523	-1.856	-132.89	128.967	-44.884	8.106	-12.2
104.533	202.687	53.337	131.883	-119.043			-13.537	18.878	-9.041	43.711	2.37	-40.681	102.342	-31.18	5.792	93.508
104.667	120.143	59.056	-24.517	-259.054			-27.39	22.074	5.325	53.54	-10.3	62.704	39.019	-33.392	53.53	100.681
104.8	115.606	33.193	-85.215	-63.275			27.444	62.36	16.352	161.075	2.279	61.238	5.137	-66.049	1.007	109.299
104.933	74.083	80.97	-150.575	-80.937			7.001	30.755	25.174	96.722	-14.742	81.71	76.164	-23.659	90.501	59.033
105.067	50.725	149.237	-214.249	27.906			12.735	34.215	1.349	64.923	20.855	108.314	191.298	33.913	55.768	101.068
105.2	17.435	132.918	-240.325	-84.925			-2.325	33.72	18.874	84.138	-1.161	132.547	139.383	-21.762	56.769	119.322
105.333	17.29	90.433	19.356	-119.267			-33.477	-12.556	-19.259	119.514	11.826	121.971	82.621	10.003	6.436	130.707
105.467	22.293	82.863	-263.224	64.71			18.713	225.565	3.812	-167.275	5.946	150.393	53.589	44.79	-4.831	35.999
105.6	55.111	25.084	-76.15	-125.666			-3.926	92.032	-1.772	-269.495	1.699	125.129	37.696	78.756	37.311	24.216
105.733	155.661	-19.393	-65.336	30.464			-14.068	74.742	-5.112	-123.342	-4.778	290.625	-63.994	40.392	13.82	-70.687
105.867	221.976	134.254	-30.295	27.67			-12.365	78.856	9.756	12.987	-1.675	207.159	43.371	26.294	12.846	97.733
106	112.113	144.384	2.923	189.652			29.871	55.789	-19.24	9.352	-1.569	104.059	34.167	20.079	12.401	-18.693
106.133	182.36	105.19	116.415	-98.035			28.317	21.941	15.989	27.104	-2.792	125.168	27.457	-18.663	21.021	19.848
106.267	79.094	131.198	26.968	22.434			46.048	15.89	4.264	7.757	-15.032	101.467	37.199	10.977	3.685	78.071
106.4	91.842	70.958	71.774	129.541			17.796	-5.507	3.989	17.406	-2.796	118.371	45.702	53.087	14.934	215.266
106.533	137.952	52.54	58.842	93.317			10.848	5.265	11.553	39.018	-4.694	116.875	113.054	159.38	4.04	67.199
106.667	130.123	68.622	153.464	53.805			50.98	-26.228	5.857	119.769	-0.441	125.129	69.849	179.358	16.439	83.148
106.8	315.449	90.502	-42.867	89.669			37.37	157.065	-9.219	-69.989	15.703	105.174	96.538	27.292	7.447	36.817
106.933	74.924	79.715	43.12	83.344			154.873	120.275	0.221	106.031	28.476	117.34	54.987	29.67	8.924	-26.346
107.067	45.235	57.177	11.859	43.622			66.197	117.694	1.737	107.003	-3.548	130.255	47.773	23.876	-0.392	67.372
107.2	22.508	57.924	32.863	67.436			-3.392	58.361	-3.76	16.436	3.496	73.447	17.345	18.178	-1.655	-36.8
107.333	-43.162	79.764	20.282	43.585			-54.893	122.329	0.498	131.58	-2.173	124.007	89.834	-27.716	-1.66	29.163
107.467	26.829	42.224	-18.977	103.279			-3.791	69.015	-0.186	-44.537	3.251	124.247	-78.871	-154.677	3.716	-44.307
107.6	143.976	9.883	7.597	54.636			-6.321	20.554	-14.082	79.254	-3.244	127.23	15.164	-151.486	-13.186	-3.516
107.733	-17.926	4.668	79.348	95.873			13.472	55.262	14.607	40.973	0.646	91.792	141.903	-148.445	-9.121	37.812
107.867	36.032	-13.256	-71.524	24.777			90.402	28.334	-8.305	45.163	0.885	-9.637	-42.584	-194.081	-4.689	60.408
108	-8.04	14.764	152.598	62.584			-100.965	110.953	-6.544	16.823	-49.304	14.892	39.707	-215.346	-9.294	-3.689
108.133	161.12	-6.191	-78.13	68.274			73.137	82.814	2.814	5.474	13.571	83.297	34.791	-314.578	12.876	-8.201
108.267	47.115	-33.827	28.598	198.253			-188.3	-22.731	13.148	24.965	-1.818	183.605	73.465	-247.418	6.769	-7.314
108.4	18.377	-8.399	2.132	101.298			-68.33	-378.56	-5.221	61.384	2.688	83.076	44.868	-243.499	1.768	-23.36
108.533	-65.405	13.402	-6.199	108.942			-22.121	-590.052	6.121	51.272	17.909	91.286	47.067	-147.4	18.575	5.758
108.667	131.245	12.136	25.181	155.364			-21.101	-545.043	-8.162	107.727	9.205	53.166	99.671	-202.398	-17.406	-104.069
108.8	128.434	-1.36	96.09	92.734			27.807	-444.143	19.61	121.485	-41.21	84.878	40.962	-197.611	8.353	-170.418
108.933	167.644	12.783	-67.39	-19.507			7.089	-378.551	8.214	42.708	-2.668	113.725	95.166	-141.733	7.26	-65.556
109.067	87.332	-11.632	22.067	-68.624			42.113	-317.474	23.43	16.029	13.718	130.489	-64.281	-75.07	-13.776	-155.544
109.2	109.976	-10.134	62.466	-16.663			22.068	-245.253	-8.132	55.05	-7.915	101.928	69.563	-118.367	-19.322	-204.963
109.333	135.392	-2.976	155.358	-38.513			25.324	-190.762	-30.863	59.881	-127.323	61.314	139.232	-106.191	15.583	-149.282
109.467	55.446	-34.477	-113.513	35.365			3.766	-118.312	67.116	85.891	166.121	37.453	37.563	50.482	-5.821	-93.471
109.6	175.061	-62.423	181.567	78.546			10.1	-79.315	-5.637	118.782	3.187	73.427	85.221	-23.085	-0.684	-35.201
109.733	111.979	-140.519	26.807	101.975			-5.317	-25.588	2.673	42.518	-1.466	62.996	55.756	22.907	11.094	-68.925
109.867	123.05	-241.183	-93.954	267.308			18.136	75.624	-6.32	61.726	2.491	81.409	77.516	76.586	8.095	5.828
110	63.21	-194.302	10.01	16.286			18.829	159.158	3.054	5.811	-13.987	103.95	9.152	-34.073	10.326	25.428
110.133	45.221	-209.367	-35.737	8.975			28.487	100.218	4.403	11.105	2.64	101.342	40.424	-39.964	3.828	10.96
110.267	104.958	-197.012	162.415	176.831			42.646	165.914	-5.057	27.467	8.414	32.075	118.896	31.103	3.804	21.34
110.4	69.831	-270.402	77.182	86.247			29.922	191.922	10.862	98.003	-3.212	6.953	30.971	8.298	-8.751	7.392
110.533	175.148	-275.496	26.106	83.31			62.891	163.12	4.963	122.764	9.992	33.628	-18.386	70.399	-3.545	18.062
110.667	4.981	-158.595	11.883	102.483			35.334	261.175	-3.376	20.532	-35.361	81.901	24.029	93.8	-3.752	8.506
110.8	110.649	-125.374	91.308	-8.772			86.641	117.35	-2.345	58.719	7.424	137.628	100.256	103.927	-13.904	3.21
110.933	80.39	-129.722	50.369	138.463			73.372	269.872	2.547	95.337	-3.237	116.718	75.798	82.935	-15.09	-8.193
111.067	114.036	-100.405	40.307	-23.47			83.772	114.551	-2.622	21.159	9.767	73.385	47.525	163.158	15.734	2.283
111.2	97.79	-108.362	50.956	106.12			41.679	97.63	-14.872	-14.432	15.303	104.408	66.951	102	19.314	-12.319
111.333	89.154	-101.214	60.035	53.42			21.162	66.491	1.002	-7.911	-79.558	128.668	45.528	77.807	13.819	-2.267
111.467	102.314	-89.134	26.016	16.201			48.21	124.731	-5.16	113.808	-3.085	153.878	82.166	89.686	-16.079	-11.838
111.6	69.485	5.577	60.309	46.702			135.221	100.21	-2.212	49.749	59.7	116.007	48.748	105.686	-18.633	18.253
111.733	102.819	22.916	38.097	188.859			59.472	129.966	-25.312	53.634	-0.327	87.261	62.571	89.122	-11.413	-19.218
111.867	109.916	-10.264	78.789	197.329			-32.695	124.313	18.397	107.198	3.027	96.324	99.265	67.612	-71.992	14.414
112	130.682	49.43	-18.7	67.662			43.198	154.492	30.285	95.054	4.337	114.509	57.985	85.076	98.361	-1.651
112.133	56.328	-13.605	-24.364	119.499			68.03	134.022	10.141	71.704	-5.013	72.659	-52.422	72.089	-3.519	11.968
112.267	116.173	-20.993	55.511	28.626			15.234	50.836	7.261	71.419	0.072	69.217	173.376	74.105	41.738	-22.278
112.4	44.596	-38.02	45.617	98.028			117.853	139.445	6.128	82.198	18.209	76.679	-26.556	87.187	-26.595	-17.407
112.533	98.358	22.015	23.085	34.875			-84.228	73.542	10.3	128.745	-8.235	71.486	57.96	170.316	20.581	-12.228
112.667	55.905	-16.971	45.974	51.4			136.42	30.997	20.908	100.302	25.241	94.379	116.225	104.517	18.822	-19.372
112.8	55.996	102.295	57.813	45.71			20.575	13.437	19.008	88.381	-0.705	73.843	79.82	140.608	-16.846	34.662
112.933	66.581	101.915	11.906	37.311			13.809	46.466	12.733	139.593	6.168	62.169	132.438	118.698	-15.697	15.254
113.067	39.775	-786.007	9.519	33.672			-50.809	41.158	11.608	105.344	-3.666	58.212	66.749	54.091	19.985	35.135
113.2	138.878	-113.334	42.47	60.544			69.483	27.929	-15.584	127	-0.913	38.708	80.012	117.745	-22.912	13.114
113.333	131.366	31.212	13.707	42.781			155.773	14.421	-11.543	87.214	6.11	91.86	87.703	48.688	1.644	29.928
113.467	47.756	-38.321	7.647	25.725			13.468	31.234	-17.437	133.811	11.455	72.816	180.562	63.949	-90.716	206.741
113.6	4.866	-26.54	49.789	59.501			146.117	-4.071	9.382	124.838	-3.028	94.788	120.566	60.22	102.07	186.94
113.733	61.961	-73.47	-14.512	-6.481			-51.177	22.767	-17.55	101.358	1.362	91.017	-10.583	74.616	14.833	8.74
113.867	163.653	-142.166	29.544	25.624			128.008	-8.117	6.461	102.577	21.622	80.138	125.134	42.91	-6.748	146.981
114	177.024	-90.418	50.119	15.56			32.392	21.191	2.482	76.8	19.211	71.911	86.36	75.446	30.918	54.304
114.133	195.383	-108.044	67.019	-48.694			39.227	161.463	12.757	69.267	22.213	52.749	108.424	73.584	-103.105	24.23
114.267	124.204	-75.974	21.404	-57.916			16.667	-29.282	2.969	54.255	8.567	80.282	90.399	96.617	69.453	70.147
114.4	123.914	-132.447	74.667	-62.604			-0.941	18.674	-5.042	49.18	31.914	52.23	73.606	92.653	1.429	86.385
114.533	127.971	-200.708	28.173	-140.091			-65.756	60.715	26.602	58.938	13.709	45.382	110.557	77.919	-10.193	72.795
114.667	-41.351	-134.127	158.597	-70.459			19.499	78.841	15.58	72.401	10.194	5.121	126.766	89.793	-58.317	113.087
114.8	229.037	8.467	-129.702	-165.691			57.665	24.176	-10.686	68.864	19.383	31.765	66.995	56.89	82.957	56.085
114.933	86.731	130.166	24.874	-179.706			30.414	27.422	48.381	145.196	7.889	51.206	127.804	61.815	-9.193	-56.413
115.067	82.742	-11.017	-25.734	-303.359			48.704	124.604	7.963	47.03	10.381	7.249	169.027	25.515	-90.289	-10.965
115.2	117.364	124.805	4.808	-285.988			-22.882	-132.162	61.551	90.357	13.308	60.223	149.005	1.331	109.21	105.228
115.333	57.005	12.299	39.346	-209.426			50.189	31.46	22.178	114.381	24.769	19.902	162.335	9.839	-86.322	-63.094
115.467	184.168	186.947	34.904	-77.833			19.856	-37.796	53.831	105.583	-13.64	34.126	154.864	1.552	94.73	-43.911
115.6	132.135	130.258	30.703	-85.24			15.416	53.458	21.169	94.846	9.415	71.063	161.314	33.065	10.87	2.297
115.733	121.226	164.212	52.406	-18.447			62.139	19.972	36.672	208.51	12.628	26.102	175.762	40.023	-7.199	150.262
115.867	126.226	148.276	30.494	-48.436			87.065	15.26	-1.319	99.078	-11.844	11.838	93.28	8.131	15.794	47.471
116	130.243	114.673	29.296	117.237			53.003	47.77	30.731	118.414	-9.054	21.816	125.033	-18.468	-3.719	70.718
116.133	157.65	116.126	85.813	106.637			79.751	-10.113	0.691	94.869	-9.537	50.316	170.113	70.129	-21.028	32.333
116.267	127.227	125.797	33.134	133.512			-3.584	-0.328	21.435	102.5	0.648	159.422	230.547	152.707	13.821	-24.035
116.4	94.646	72.45	61.972	142.502			12.287	67.678	34.354	212.499	11.083	-27.556	157.209	76.554	23.401	-88.582
116.533	76.134	105.102	19.132	164.468			9.579	17.219	35.768	61.552	-15.326	94.57	65.033	31.399	-2.739	-144.064
116.667	81.196	106.436	33.509	143.448			8.441	14.045	1.818	38.382	3.971	201.497	127.712	18.604	-7.538	-220.251
116.8	104.216	2.868	48.74	179.238			38.364	-15.583	16.355	29.389	6.64	14.962	153.175	12.226	2.288	-220.981
116.933	82.692	31.563	12.872	150.571			34.06	5.153	21.34	113.951	-0.888	13.585	152.978	32.751	-12.791	-297.818
117.067	88.197	372.087	27.292	162.862			43.062	-43.515	-20.225	95.995	7.043	-75.432	142.159	-4.429	18.139	-390.205
117.2	5.368	92.786	40.264	179.305			74.588	66.658	16.864	141.947	-12.559	248.746	19.272	28.017	-14.231	-288.044
117.333	-133.126	65.082	160.994	204.474			35.504	-82.526	-1.568	91.554	0.384	-0.877	123.168	45.697	-14.764	-251.676
117.467	75.478	63.687	-60.935	131.818			52.364	-250.535	-9.687	28.554	-0.529	86.604	222.953	-61.658	-94.167	-198.712
117.6	47.718	49.939	28.804	124.698			75.049	-35.529	31.188	101.209	6.409	81.189	120.568	-14.297	90.878	-266.015
117.733	52.104	87.628	32.65	27.203			28.147	-153.222	-22.938	68.826	-13.9	67.125	126.643	2.114	16.494	-219.052
117.867	159.785	98.578	2.923	-11.092			32.81	-194.584	-1.404	117.658	-8.598	48.727	50.599	-7.852	9.299	-150.241
118	209.301	45.267	8.194	-24.05			85.08	-240.925	2.861	109.085	19.031	205.973	117.128	-19.337	-5.46	-148.628
118.133	-21.704	89.555	-30.636	-22.527			23.026	-145.146	-0.355	106.808	-16.669	24.62	-26.912	-4.673	-3.279	-205.654
118.267	143.95	106.423	27.891	58.17			24.468	-215.987	-9.801	74.277	3.356	67.068	79.969	-0.312	14.792	-183.28
118.4	182.881	117.62	11.802	65.277			40.888	-218.318	-0.173	69.667	-24.245	84.054	206.229	12.828	-21.71	-124.618
118.533	207.737	11.003	35.067	-12.542			84.967	-253.067	4.152	92.5	-25.249	71.447	64.494	6.963	25.69	-165.058
118.667	131.939	12.526	-2.475	36.185			15.271	-247.282	-16.292	103.113	21.619	86.248	75.626	-186.095	4.512	-206.516
118.8	147.825	91.027	18.717	46.275			24.162	-215.133	5.423	90.293	-23.423	109.294	102.809	-203.637	4.009	-153.454
118.933	168.786	126.149	-8.72	64.991			52.957	-265.99	-7.495	100.642	15.452	94.992	58.485	-162.298	-5.595	-259.095
119.067	48.465	63.168	9.639	74.11			50.561	-360.831	-1.481	96.77	16.329	99.056	42.641	-179.225	30.198	-328.239
119.2	-58.996	133.89	4.129	185.424			2.899	-223.071	-6.767	66.05	-29.429	62.646	22.018	-221.997	19.772	-290.3
119.333	121.688	78.316	-29.042	224.452			26.005	-226.757	4.921	103.793	8.586	48.854	55.569	-211.691	10.086	-336.654
119.467	-100.37	97.282	27.511	188.342			42.978	-233.559	-20.679	98.394	-13.996	90.143	36.77	-175.949	2.891	-355.228
119.6	-19.766	131.502	52.025	200.754			38.261	-197.151	-7.621	76.687	8.517	92.935	-112.311	-129.763	-17.866	-209.315
119.733	46.998	60.077	34.647	214.474			72.419	-225.28	-1.051	113.304	-23.536	21.093	163.48	-212.963	1.266	-157.805
119.867	-142.114	98.628	17.134	180.189			50.123	-176.765	-1.704	138.164	-3.394	40.783	18.847	-247.377	6.229	-82.968
120	-275.078	87.467	-22.848	117.511			84.782	-124.667	-8.659	236.329	-123.112	124.707	-241.91	-213.259	11.554	-123.602
120.133	-535.745	327.863	-193.306	421.16			-373.266	-247.681	36.328		-248.452	627.247	511.804	473.703	669.003	-563.504
120.267	-140.186	122.407	76.96	318.371			74.905	-392.402	398.402	141.185	-289.034	85.102	288.339	-380.948	319.274	514.395
120.4	51.429	96.365	289.81	446.527			-73.962	186.169	246.316	-406.86	-23.155	14.794	219.939	-207.842	423.589	592.65
120.533	117.944	138.024	182.832	300.32			-42.802	80.651	287.39	-105.516	-17.17	24.448	143.11	-139.394	176.842	704.452
120.667	42.835	146.962	88.269	274.848			-5.141	7.199	180.954	24.28	-30.481	-2.588	140.286	40.49	16.986	288.213
120.8	96.135	71.824	78.813	189.294			-4.67	5.449	93.491	35.407	-81.768	-13.111	177.41	-197.248	42.979	86.51
120.933	-9.011	75.3	85.912	117.475			7.868	-4.954	35.119	16.015	-59.165	-7.002	112.494	-42.088	21.651	241.346
121.067	18.998	28.287	107.506	126.442			-27.328	20.406	40.332	8.051	-28.618	-88.417	229.54	-102.674	41.586	86.818
121.2	261.868	-217.71	314.206	165.595			194.052	283.225	-180.67	-181.231	206.683	9.706	200.572	-24.008	27.638	111.709
121.333	17.013	10.07	305.259	153.499			61.1	104.934	29.292	118.594	-4.843	30.921	180.152	-37.879	20.233	172.084
121.467	368.173	48.676	-198.74	93.299			-12.477	83.935	24.623	-156.896	34.443	24.158	182.8	23.284	63.206	70.719
121.6	243.579	25.389	56.725	118.388			27.156	94.854	7.991	2.939	-14.909	32.972	112.501	-38.089	-4.102	83.61
121.733	236.227	-16.92	196.487	35.459			-5.868	147.487	31.913	-21.843	11.879	-16.342	202.072	-314.387	5.278	5.467
121.867	133.007	-10.917	-57.384	125.894			-13.232	146.901	34.15	-39.091	-5.973	24.689	175.449	-276.067	-10.104	10.902
122	150.907	-27.373	226.464	149.236			-7.9	182.012	12.423	-72.951	15.158	24.521	192.101	-283.73	-13.538	122.216
122.133	126.317	15.046	36.918	193.737			-2.79	152.103	33.593	-177.411	-0.589	67.127	113.113	-119.434	25.255	30.562
122.267	165.528	1.896	100.829	178.597			13.605	81.967	34.49	-208.305	0.091	125.368	257.943	-193.948	26.593	-81.365
122.4	134.033	-196.271	160.546	267.575			5.924	128.739	59.453	-210.516	-13.777	80.876	254.996	-194.64	31.72	163.753
122.533	105.142	-224.891	220.375	153.908			-2.726	158.007	5.528	-221.7	-23.04	82.18	211.922	-250.265	9.508	217.251
122.667	-7.912	-325.738	157.122	143.254			22.845	-7.456	19.531	-234.599	-119.23	129.648	247.283	-183.503	38.53	211.567
122.8	253.957	-360.267	66.865	149.561			-24.182	196.355	23.494	-258.751	116.151	-33.941	164.565	-93.177	11.677	245.379
122.933	66.715	-281.266	117.582	174.935			-28.012	86.653	11.284	-282.827	-11.332	211.203	216.973	-204.132	-5.399	410.425
123.067	139.508	-159.973	81.422	187.268			38.363	124.685	30.825	-298.734	2.862	150.973	203.574	-21.517	35.757	177.964
123.2	194.529	-124.528	151.016	118.252			8.939	93.931	9.608	-315.171	0.504	77.618	263.01	55.784	9.757	177.964
123.333	103.214	-72.535	94.022	175.641			11.651	50.312	-22.808	-253.207	-0.655	120.15	196.658	412.958	-2.216	84.676
123.467	146.433	85.875	141.591	201.028			-14.928	115.577	-2.632	-190.726	1.863	137.67	174.717	42.242	17.284	216.378
123.6	118.539	6.665	111.398	133.597			-8.965	97.375	17.261	-221.14	0	124.17	177.881	45.387	24.863	172.196
123.733	118.952	10.961	114.817	176.924			7.063	190.97	-3.181	-144.251	-10.924	51.142	172.275	71.524	-11.37	157.254
123.867	140.696	62.284	97.337	121.548			5.781	101.737	3.356	-164.374	-10.891	20.6	153.059	118.281	-3.461	305.592
124	131.356	64.827	311.643	163.979			-11.39	123.387	-4.287	-86.337	18.509	43.947	103.378	31.942	-8.038	301.502
124.133	140.073	95.271	-77.204	163.471			15.966	117.986	-5.346	-165.824	-4.115	106.105	153.664	45.527	-0.953	202.134
124.267	119.264	75.574	154.549	196.371			-0.95	135.533	15.158	-187.188	-9.486	193.452	163.71	-153.23	-12.648	207.641
124.4	113.53	83.175	112.893	18.977			-30.004	126.562	-9.93	-92.995	20.672	101.155	111.839	-90.061	-7.156	245.081
124.533	90.76	70.454	111.27	230.701			17.519	151.949	-6.49	-118.537	-12.258	51.734	54.585	-25.804	35.745	120.334
124.667	133.483	117.165	126.169	-14.98			1.119	142.431	3.413	-178.692	8.296	93.784	19.874	-15.001	-9.689	273.742
124.8	98.213	61.171	132.538	129.457			17.082	137.126	8.244	-168.121	11.016	57.477	37.284	19.686	-5.213	293.136
124.933	76.803	103.804	90.251	198.488			-18.124	93.434	16.937	-170.562	-4.247	-74.091	-61.798	9.575	-14.975	10.116
125.067	79.587	61.835	142.76	82.825			22.191	46.16	-3.669	-35.011	4.092	37.218	87.503	101.855	8.389	51.847
125.2	108.098	46.48	97.599	34.894			-7.726	93.928	7.767	-45.266	11.986	145.098	31.487	190.36	48.525	105.474
125.333	-16.222	78.576	153.117	91.2			-11.772	166.057	28.724	-79.414	-5.269	108.741	77.998	36.83	-20.062	201.206
125.467	283.658	86.415	28.529	123.854			16.554	36.417	-27.709	-5.379	-4.22	62.353	73.701	16.035	5.476	335.293
125.6	145.741	64.003	85.511	76.291			-5.906	30.298	-1.292	124.239	8.046	62.497	50.081	152.855	-10.836	201.847
125.733	123.606	99.424	64.382	73.794			11.621	264.658	-7.351	42.396	11.72	65.254	-11.424	249.703	-7.701	211.749
125.867	72.421	152.673	59.439	60.485			-21.86	29.326	6.77	3.952	1.747	51.711	120.894	161.353	3.285	88.382
126	46.622	112.162	-54.744	64.417			22.416	133.242	15.737	17.364	15.681	-33.933	-44.58	8.818	10.659	194.639
126.133	124.766	145.295	202.515	44.911			-4.358	90.74	2.948	17.732	-9.585	-30.787	110.716	68.161	14.743	152.651
126.267	169.073	205.313	99.806	54.184			-15.181	78.281	-1.381	25.537	10.826	71.892	144.193	15.844	-40.056	208.051
126.4	270.549	179.975	141.861	75.134			7.941	43.091	11.315	104.371	1.832	-90.325	104.358	62.791	-21.017	182.505
126.533	240.732	233.169	136.421	98.926			-14.19	66.006	2.387	62.383	9.391	74.634	99.47	85.824	-20.777	255.702
126.667	10.174	265.2	154.412	112.845			39.041	37.751	34.393	171.865	2.169	125.977	118.929	49.825	30.233	138.958
126.8	378.892	272.116	31.34	69.62			-15.381	51.125	16.945	106.807	-17.099	177.167	246.064	60.06	28.88	179.949
126.933	156.358	330.534	79.893	81.98			-3.378	118.268	4.781	56.565	23.035	142.06	131.987	48.643	-11.759	122.513
127.067	194.948	169.431	19.439	47.508			-10.876	90.833	14.379	49.85	-0.867	128.326	144.59	6.071	8.937	53.813
127.2	134.708	342.153	56.487	42.778			-27.259	-7.421	40.351	51.452	1.097	49.105	64.289	77.462	-23.438	111
127.333	127.338	191.371	31.562	-64.517			15.219	55.59	12.907	79.041	6.324	104.792	192.4	37.126	-3.184	128.417
127.467	145.199	186.339	42.792	32.73			26.815	49.775	2.969	-207.02	-6.557	101.22	207.308	169.895	-10.166	154.987
127.6	135.135	208.928	30.13	87.942			-2.452	26.016	12.24	-465.963	1.568	78.029	-27.471	134.476	5.161	145.871
127.733	158.98	190.331	34.122	144.413			10.946	55.355	-24.751	-274.821	7.131	82.027	187.97	92.511	15.078	129.97
127.867	64.354	142.787	63.003	51.849			-11.612	36.975	8.993	-109.247	-6.918	160.095	83.987	96.191	-3.658	133.669
128	-20.077	166.721	14.447	71.764			-4.281	65.725	-6.49	-50.292	-90.213	126.481	17.33	65.701	2.248	112.874
128.133	229.99	193.214	118.335	49.846			-3.924	118.069	3.993	-27.696	7.337	190.633	185.679	152.15	-14.661	107.299
128.267	190.396	157.182	32.406	80.418			24.032	40.128	-25.488	17.357	1.019	145.063	-2.112	75.596	-21.919	26.481
128.4	123.612	154.887	13.029	83.885			10.397	60.944	-11.105	-48.608	3.863	125.182	71.588	55.206	-57.586	187.811
128.533	179.654	78.016	82.762	92.81			-26.051	63.418	-11.653	-86.734	3.222	120.541	47.768	43.04	-53.085	108.485
128.667	174.81	128.759	3.123	9.138			-60.041	42.303	51.575	-151.651	2.315	151.707	116.616	61.306	-94.048	152.767
128.8	174.704	110.087	-30.629	171.36			-91.345	6.287	14.437	-198.653	-7.692	126.51	94.544	129.785	-104.045	18.202
128.933	232.691	160.399	39.051	89.838			-117.891	72.202	17.058	-187.138	15.156	153.202	74.532	72.255	-105.047	210.414
129.067	268.67	101.347	8.017	62.308			-124.92	38.815	-10.365	-187.779	-2.602	187.862	65.092	49.415	-82.925	52.141
129.2	178.951	89.479	-19.467	106.625			-132.974	0.841	17.979	-186.135	2.096	248.31	-7.198	57.52	-45.369	221.558
129.333	259.286	84.988	153.702	84.313			-158.488	28.473	7.263	-174.874	3.425	129.091	122.886	127.499	-86.065	85.373
129.467	163.181	68.897	-105.529	55.975			-164.128	-13.53	-6.856	-137.902	7.112	262.844	9.042	-92.898	-89.225	220.721
129.6	159.186	118.943	15.59	79.658			-118.818	55.563	8.677	-59.405	8.794	103.056	-93.13	-16.54	-84.649	158.524
129.733	98.781	61.745	18.514	49.799			-21.298	97.273	-9.768	-14.834	-4.081	102.124	1.352	-60.047	-25.077	150.66
129.867	182.31	48.836	20.568	104.555			-29.849	72.105	-2.997	-15.941	6.908	181.538	94.781	-37.614	29.613	158.449
130	209.686	30.027	-4.302	50.761			71.206	52.08	1.2	8.597	4.253	151.823	-127.204	9.826	64.135	114.151
130.133	150.603	37.003	1.993	97.059			-31.717	41.972	-0.441	29.972	4.693	154.255	121.848	60.241	64.274	109.102
130.267	175.86	-17.149	-14.382	115.835			-7.333	97.589	9.675	27.99	-9.047	153.49	-3.84	181.548	27.31	90.657
130.4	255.237	3.114	0.441	93.506			-22.012	83.853	9	66.274	-4.769	134.091	-21.039	69.271	20.502	173.391
130.533	199.807	24.786	-0.741	76.439			-155.872	52.133	8.193	38.923	24.062	74.156	14.813	48.782	5.843	177.706
130.667	260.491	43.54	48.2	81.314			-47.77	127.305	27.65	117.096	6.623	-126.836	-128.731	126.129	-6.962	98.013
130.8	37.547	99.11	47.455	62.887			-65.742	-51.299	1.623	-100.514	-0.857	326.701	118.684	-112.694	2.164	96.912
130.933	172.01	90.27	6.155	78.845			36.38	80.627	2.292	21.347	-0.248	155.683	-8.718	-6.764	3.828	131.706
131.067	166.844	62.024	-2.7	77.254			-99.48	70.837	-0.949	19.964	1.131	182.139	-117.226	12.14	1.853	100.051
131.2	148.939	33.185	8.297	90.727			-105.633	16.413	6.468	36.43	-1.133	191.078	23.339	-33.322	-8.685	99.919
131.333	160.875	3.27	-3.174	55.242			-47.343	27.933	19.677	94.413	-6.275	180.654	-0.274	-64.434	1.282	89.047
131.467	149.934	9.974	0.997	81.836			-64.392	72.471	-4.772	56.637	10.884	138.904	23.367	-106.027	5.535	139.011
131.6	130.342	-3.793	-20.256	61.246			-50.172	47.845	-0.481	65.292	2.364	192.759	20.332	-214.535	5.15	87.445
131.733	166.393	50.546	7.747	132.782			-115.859	28.305	-0.713	104.461	-0.105	112.805	120.508	-102.733	-17.401	139.352
131.867	232.668	88.53	-3	-52.981			-44.771	56.954	3.602	54.021	12.215	155.818	-165.112	-142.159	-9.798	160.316
132	134.086	115.1	33.443	190.609			-88.067	46.126	-2.276	117.918	9.638	139.236	-12.069	3.859	18.834	127.327
132.133	319.766	66.732	-34.468	52.44			-62.358	125.232	3.758	-25.962	11.74	155.181	120.526	-394.202	29.314	82.033
132.267	141.489	82.614	8.285	-127.254			-64.031	51.511	-0.882	35.932	-0.091	132.85	146.732	-252.79	36.22	113.656
132.4	84.925	13.247	18.658	86.898			-64.214	116.532	1.769	-13.13	-14.299	157.441	3.674	-155.23	30.445	145.198
132.533	136.268	66.183	0.703	54.574			-188.749	127.397	12.854	16.715	0.745	231.198	-4.959	-30.759	59.775	425.168
132.667	83.009	108.315	-2.619	75.28			-75.334	119.157	-4.408	71.104	-8.355	86.235	78.595	-254.422	50.175	67.455
132.8	58.553	72.764	15.049	121.671			-96.235	131.561	-5.472	110.445	1.52	248.62	-135.262	-131.762	11.476	64.869
132.933	166.777	65.025	-0.006	150.819			-125.287	104.19	-9.926	208.034	20.805	78.57	-310.417	-208.415	24.11	102.248
133.067	99.353	12.304	-14.933	156.791			-132.528	153.58	11.401	132.577	-20.615	152.476	-218.737	-251.146	5.626	97.477
133.2	71.773	15.98	3.684	236.098			-161.006	200.687	-1.205	173.872	12.2	225.029	-229.533	-198.297	13.649	126.158
133.333	-26.893	17.043	24.647	-65.311			-124.561	105.818	2.596	225.942	2.591	-125.415	-239.532	31.278	-18.652	96.373
133.467	155.535	-2.256	-25.689	270.495			-66.535	54.785	3.265	203.008	40.165	421.642	-88.107	-257.244	-10.825	136.027
133.6	112.233	-4.131	-21.916	-35.869			-48.246	169.671	-4.271	180.112	-5.435	143.147	-274.595	-196.177	9.369	93.045
133.733	69.111	17.552	11.708	171.435			-16.923	176.802	7.676	139.875	18.103	100.522	-245.097	-227.984	-3.265	121.319
133.867	-12.37	13.019	-13.326	132.737			4.466	334.575	-0.98	134.344	-2.166	10.125	-283.987	-14.484	0.847	92.206
134	6.838	-4.168	-19.394	47.249			-3.274	149.066	0.657	124.492	-3.669	213.928	-317.39	439.319	-4.764	104.144
134.133	-5.923	2.004	4.905	136.253			18.318	194.773	2.63	137.546	-1.251	153.913	-327.849	-164.137	0.73	124.814
134.267	6.417	-9.441	7.169	62.853			-10.123	149.185	3.338	91.351	15.178	-15.299	-241.313	186.41	-21.246	96.496
134.4	105.431	6.835	70.846	132.372			-13.204	148.018	1.253	108.802	-0.97	166.682	-139.567	277.197	13.766	132.039
134.533	172.642	12.203	61.82	106.295			-23.281	163.674	0	159.998	-2.197	-48.829	-218.771	219.233	-4.729	121.916
134.667	150.642	-4.104	155.283	78.089			23.423	152.259	9.61	264.584	2.576	171.672	9.445	159.841	-23.989	160.631
134.8	188.822	-32.48	30.003	103.251			-7.551	139.104	3.081	242.59	6.398	180.314	-24.797	108.456	-1.164	135.472
134.933	151.02	-26.408	74.404	85.42			35	147.205	-0.461	152.559	-2.618	150.294	-7.689	306.787	1.006	100.121
135.067	136.361	44.56	30.027	175.065			18.259	191.453	-2.055	12.613	-6.733	123.496	-53.992	157.154	-11.187	53.643
135.2	135.802	52.441	-20.685	83.541			-12.781	150.705	0.394	100.578	0.785	115.586	-39.838	152.992	-2.497	9.377
135.333	114.427	-68.888	29.317	89.591			12.028	158.396	6.643	35.107	11.138	152.082	-32.16	205.508	2.16	37.402
135.467	160.501	113.921	3.995	84.86			44.589	111.707	-1.29	-418.918	-16.889	128.751	-14.176	199.802	3.316	82.597
135.6	125.785	83.995	10.279	88.256			-11.901	136.435	-0.598	-243.605	10.713	56.578	8.844	91.122	-17.342	110.672
135.733	99.718	54.702	4.054	43.032			105.117	121.156	5.694	-39.977	-2.604	103.588	136.259	81.902	-14.754	125.731
135.867	149.109	46.529	11.878	132.225			109.407	114.528	1.758	-31.799	12.134	66.798	123.824	-76.822	-11.966	221.863
136	-24.597	35.224	40.033	76.315			72.48	-5.578	-13.151	113.638	0.702	166.864	124.86	130.425	-9.874	151.813
136.133	324.26	50.483	36.235	126.563			59.379	160.668	-1.838	-87.46	-4.91	61.919	-87.751	23.552	3.018	102.655
136.267	103.991	-249.77	10.741	99.702			63.463	129.023	-0.514	180.521	10.225	161.35	-6.997	34.635	-5.732	69.739
136.4	124.501	-437.791	-4.013	77.837			25.944	140.305	7.736	77.379	-9.255	144.196	20.186	-25.064	2.371	15.505
136.533	128.754	-241.319	-16.99	47.303			44.395	105.41	-6.397	178.888	11.622	147.102	22.629	-94.705	-2.984	37.008
136.667	170.094	-99.542	0.755	35.912			84.754	122.863	7.664	306.517	-9.42	154.921	8.386	70.578	-20.544	45.008
136.8	199.155	-32.148	0.959	83.029			22.687	82.333	-1.813	53.668	12.116	153.775	71.324	-112.365	-10.757	99.279
136.933	235.119	28.486	-4.82	21.422			18.645	167.592	-6.059	43.802	-2.807	112.994	76.006	113.358	-0.134	123.899
137.067	181.498	29.59	21.458	21.664			82.011	92.944	5.457	61.065	-9.688	166.567	51.544	15.95	-32.081	132.546
137.2	182.703	45.933	-19.973	7.975			39.627	137.27	1.749	-37.744	3.711	150.841	130.062	-34.597	7.079	139.848
137.333	134.416	132.663	36.816	107.663			28.955	20.835	-7.638	19.383	13.95	149.805	96.595	-63.222	-16.325	91.501
137.467	246.423	-76.648	-33.834	74.587			68.193	161.318	8.406	160.478	0.185	160.36	107.69	-31.891	10.971	114.01
137.6	219.315	23.762	0.046	76.039			43.671	102.227	-1.865	34.885	-7.379	108.754	97.984	-53.976	-35.168	117.298
137.733	232.934	14.415	25.625	92.331			14.383	19.123	2.877	10.538	8.651	115.608	112.037	-17.659	1.203	154.193
137.867	194.473	24.427	-0.999	36.109			24.361	76.182	0.861	148.77	-6.584	134.254	12.538	184.36	-34.339	116.724
138	199.16	15.286	1.646	66.854			49.863	95.23	-4.239	144.402	2.374	131.611	7.302	11.338	-0.903	151.168
138.133	179.178	10.29	-1.582	-11.722			27.614	62.908	-0.233	131.3	3.159	145.517	-6.115	-30.259	20.1	115.369
138.267	155.404	22.637	-12.704	49.411			31.333	104.236	-0.643	173.325	-10.235	168.677	12.982	-27.922	-44.799	181.931
138.4	152.993	-5.151	-8.347	-13.024			22.578	74.75	4.779	129.493	9.142	39.447	-1.623	86.972	-13.766	180.435
138.533	231.536	-11.034	7.807	21.106			60.715	63.21	-1.042	90.535	-8.331	260.509	8.546	24.893	-39.072	125.722
138.667	134.01	-4.786	11.607	28.671			25.59	15.293	-6.943	44.208	-126.558	119.167	18.863	-81.188	-40.644	128.872
138.8	305.33	-45.179	10.729	39.428			11.488	60.885	0.805	1.79	125.298	49.806	10.754	119.731	-27.288	91.831
138.933	175.527	-39.75	4.704	123.649			12.238	96.911	9.856	-21.516	0.867	143.682	32.305	-59.761	-5.802	102.771
139.067	151.526	-56.42	-11.718	183.727			16.784	128.394	-0.809	32.836	8.239	211.261	-25.904	81.527	-34.195	154.624
139.2	176.209	-46.412	-9.468	232.726			-25.697	66.042	-0.371	7.189	9.722	198.152	-2.775	156.771	-16.6	157.785
139.333	168.73	-62.352	-3.672	105.375			79.009	11.315	0.227	36.215	-11.402	144.602	101.472	-21.303	-54.708	76.861
139.467	132.702	-26.31	5.376	135.568			92.787	18.537	0.741	-106.686	-0.885	161.756	134.109	191.434	-10.424	122.773
139.6	119.669	-32.239	3.626	71.163			96.228	98.12	1.408	-252.441	-1.445	152.168	-11.945	-40.182	-6.328	143.318
139.733	203.439	-35.15	-12.11	70.934			77.638	126.986	-6.377	-212.223	3.782	153.227	77.364	83.768	-19.292	170.297
139.867	213.97	-27.442	-5.778	65.321			22.97	94.191	11.68	-235.62	-3.632	118.958	4.225	102.351	-4.25	139
140	258.455	15.375	16.213	134.884			8.53	203.449	-20.095	-186.982	4.343	120.093	-7.983	366.748	-12.569	133.159
140.133	103.739	-46.003	27.348	120.064			-8.654	20.574	13.359	-242.17	-1.904	57.621	-46.7	-224.949	14.841	49.474
140.267	157.829	-29.064	-26.01	48.26			10.166	146.013	5.801	-48.935	-0.621	114.719	-47.509	62.125	-4.544	51.57
140.4	100.384	-6.68	17.638	106.543			21.517	108.231	-7.023	-236.713	-0.893	100.396	51.99	40.88	19.622	61.168
140.533	167.884	-38.222	-2.104	129.551			20.929	78.396	-1.967	-165.853	0.697	146.206	-68.094	11.043	-9.118	104.444
140.667	116.511	-47.354	2.139	125.36			69.644	92.786	-7.192	-126.88	2.621	108.285	-195.513	42.767	-6.741	126.516
140.8	147.323	-28.159	-9.514	97.878			41.201	71.458	14.909	-86.392	0.701	103.834	-29.131	62.084	0.477	89.57
140.933	157.95	-41.133	7.149	77.263			41.424	8.801	-20.57	-82.229	-2.402	212.897	-318.01	36.574	1.373	112.684
141.067	128.792	-72.133	3.478	151.306			15.484	9.723	9.281	-103.205	1.241	104.158	-256.366	73.876	2.7	81.273
141.2	62.08	-90.908	-8.887	112.288			27.448	-38.92	-8.189	-93.315	-2.909	181.745	-180.913	38.632	5.611	88.926
141.333	115.576	-128.689	166.657	113.835			3.831	-29.658	-10.902	-13.876	-126.27	126.351	-352.62	-14.766	-5.39	173.197
141.467	129.683	-16.595	-131.936	119.016			0.757	50.061	1.296	-274.11	145.265	210.788	-40.451	4.905	10.164	34.394
141.6	72.326	-86.335	-17.394	134.744			-12.826	175.115	5.177	-137.911	-20.084	141.411	-185.17	-20.53	0.987	200.654
141.733	172.83	-128.76	-0.078	131			24.367	-55.746	7.907	-118.767	-0.025	150.506	5.007	-3.169	8.716	30.192
141.867	193.273	-156.756	-3.011	146.626			11.201	139.098	3.657	-17.33	-2.16	140.263	14.765	4.91	-5.593	-33.101
142	173.246	-213.313	1.217	103.743			27.988	58.515	0.686	119.841	2.409	162.376	-33.875	3.223	-1.437	-256.952
142.133	85.006	-150.296	0.948	124.055			7.95	51.929	-3.565	168.613	-1.837	104.749	-85.908	25.479	12.334	207.744
142.267	70.68	-158.916	-1.343	137.674			97.409	70.302	0.875	131.698	1.355	143.199	-202.026	41.011	33.309	33.109
142.4	169.61	-78.272	-1.218	161.19			167.566	88.323	-2.801	121.064	-1.096	93.813	-153.628	48.636	12.419	60.776
142.533	246.022	-58.366	-20.069	124.369			78.874	120.283	3.668	129.835	0.985	127.418	-126.143	75.002	-3.968	51.957
142.667	129.244	11.135	18.093	170.187			113.243	88.317	5.35	116.047	15.923	51.755	48.804	99.224	-15.47	117.365
142.8	312.317	-80.549	-4.099	108.835			52.679	57.733	-2.196	123.313	-1.91	145.543	47.788	78.829	-0.571	74.151
142.933	148.744	35.831	-52.803	128.168			7.138	76.896	3.158	139.779	0.166	135.419	12.777	-20.562	-8.731	76.354
143.067	160.429	39.104	-101.857	84.112			68.685	84.952	-8.121	135.294	6.065	179.945	134.112	-12.156	12.965	104.058
143.2	141.209	64.826	-111.651	103.037			63.172	95.201	-7.51	117.859	0.514	127.057	141.637	-35.807	21.112	107.117
143.333	127.153	17.942	-121.969	111.219			58.7	74.993	17.583	79.023	-20.639	9.832	122.656	-8.494	3.247	76.312
143.467	195.082	19.564	-107.641	77.269			55.616	64.21	-12.107	45.408	0.095	88.684	56.279	-20.844	-11.413	59.936
143.6	196.086	38.082	-129.986	50.998			80.51	31.318	-12.433	54.408	-1.16	98.898	101.751	-30.185	2.489	149.863
143.733	206.357	33.851	-86.363	29.868			52.629	75.069	-5.079	38.643	9.621	93.869	61.309	-8.046	33.156	65.056
143.867	209.794	1.188	-109.262	40.841			53.906	37.385	7.019	22.275	-0.668	117.877	57.038	-38.308	6.694	9.123
144	173.534	128.367	-30.141	-9.075			62.738	6.685	9.775	48.023	-9.513	156.583	63.494	-142.491	-7.92	104.085
144.133	165.71	-130.846	-260.292	19.371			80.88	75.713	-0.692	-9.545	-0.357	121.855	164.045	-164.428	2.667	8.128
144.267	203.353	-23.423	-47.334	32.993			30.399	17.519	1.084	4.676	-2.228	158.252	24.209	-175.407	-15.131	-17.239
144.4	201.565	3.138	-53.345	60.306			47.515	-26.374	-1.269	19.324	8.193	126.572	27.604	-118.012	48.394	3.414
144.533	244.569	-44.701	-78.091	98.81			6.314	129.109	2.622	25.658	9.677	89.862	42.038	-48.414	9.543	-56.055
144.667	266.763	-64.809	-110.064	31.904			56.075	113.865	-2.336	-1.794	6.135	125.547	33.784	-220.846	44.558	-166.62
144.8	238.247	-55.231	-102.653	78.337			-2.482	136.585	3.092	24.978	-6.073	120.081	-20.916	-48.581	40.753	-42.756
144.933	189.776	-53.425	-104.323	125.764			45.271	114.555	8.836	-7.929	4.063	78.227	117.339	-138.299	24.53	9.952
145.067	309.833	-45.262	-83.522	77.59			24.726	87.436	-7.991	2.798	2.684	89.005	116.88	-206.89	-14.634	-5.305
145.2	259.193	-29.797	-65.718	59.519			32.723	50.265	3.383	21.974	-20.021	163.93	68.542	-136.635	9.383	49.085
145.333	260.173	-7.489	29.288	67.899			12.583	41.273	-12.811	-14.225	1.651	-9.308	120.348	-162.374	-15.479	95.981
145.467	260.576	-46.543	-122.818	34.529			46.96	11.687	0.241	17.056	-3.584	221.614	74.375	-86.757	29.66	54.919
145.6	391.127	-69.694	-21.604	45.833			-56.901	59.914	2.092	-15.037	-2.835	130.018	89.157	60.984	-13.506	50.347
145.733	130.651	-94.931	-61.287	54.329			127.86	31.816	13.171	12.569	3.061	229.658	73.83	-41.019	-9.544	9.375
145.867	-4.104	-106.118	-63.154	84.22			37.056	16.724	-13.986	-13.098	-2.529	70.315	49.942	-12.75	-10.186	77.418
146	-1	-78.027	-44.148	70.152			8.37	-1.353	12.859	-7.654	1.123	131.912	106.012	-78.871	29.232	39.737
146.133	-10.963	-26.777	57.235	120.97			-4.955	56.459	-2.777	5.348	-0.607	112.388	76.146	134.518	-5.096	30.415
146.267	130.092	-55.443	66.043	48.899			5.079	52.166	-5.359	-9.375	9.409	109.828	147.682	192.787	-8.009	78.906
146.4	-136.511	-119.269	-120.976	110.244			12.15	72.939	3.153	-100.075	-8.198	154.536	137.368	214.916	9.861	70.415
146.533	-132.858	-49.921	207.24	63.437			-1.958	83.405	2.327	-127.643	-0.36	173.021	118.296	87.549	3.081	117.701
146.667	-130.33	-128.03	165.779	92.993			-105.718	-4.783	1.047	-219.794	-5.494	126.388	113.668	47.351	-12.325	103.503
146.8	129.765	-67.45	-111.205	132.748			112.555	19.256	1.092	-222.205	1.184	193.924	63.337	29.839	24.66	109.093
146.933		-15.71	7.901	82.246			-22.383	-31.819	-7.965	-242.663	0.118	134.644	9.543	29.488	-2.404	74.42
147.067		20.841	21.3	189.708			23.022	-49.492	10.863	-279.95	1.875	116.965	10.16	-5.409	-3.216	67.614
147.2		26.257	8.524	93.773			10.54	-39.843	0.295	-272.217	0.328	113.854	2.396	29.137	6.442	44.219
147.333		-19.214	50.656	115.783			-8.995	30.891	-0.756	-222.997	-0.522	156.294	1.017	-49.001	-15.958	73.677
147.467		79.279	-14.626	142.79			3.443	21.546	3.643	-254.912	2.762	98.375	-9.746	-38.065	10.44	25.49
147.6		195.18	17.829	138.894			-27.609	183.015	-6.622	-216.844	0.875	38.62	9.657	2.517	2.49	41.524
147.733		46.272	39.57	151.857			-91.143	238.767	2.07	-124.49	17.34	25.912	14.255	104.04	-9.732	50.692
147.867		79.255	-28.208	135.751			107.371	132.997	-15.015	-189.774	1.094	93.411	-1.464	164.793	-4.963	114.1
148		129.262	-25.836	188.878			8.924	106.739	1.887	-161.521	1.078	-1.799	11.303	104.682	-10.926	132.171
148.133		-41.103	-22.762	146.686			-7.272	88.513	9.754	-156.808	-2.417	356.002	-1.521	62.283	-12.898	95.414
148.267		24.572	-1.501	177.966			6.912	103.896	-6.62	-136.297	-20.646	173.371	-26.368	74.242	16.06	98.724
148.4		18.41	-0.182	101.175			-21.605	94.465	6.669	-94.792	8.261	97.902	-12.712	79.957	7.042	108.698
148.533		34.753	2.653	85.52			-107.938	53.744	6.47	-25.782	-10.893	147.722	-69.822	112.132	10.974	87.506
148.667		123.633	28.563	59.978			118.48	126.036	16.105	23.265	8.343	142.385	112.808	231.207	5.776	139.5
148.8		103.262	-0.589	180.656			-6.426	104.733	-15.8	-16.436	-19.028	120.397	-35.813	157.561	21.054	106.65
148.933		137.425	-27.304	106.478			-103.511	91.635	-2.103	21.581	9.285	146.216	-3.343	53.228	-8.693	55.219
149.067		58.486	-0.966	194.873			113.208	104.991	9.825	-19.378	8.341	165.831	22.189	11.255	-13.186	125.206
149.2		18.246	15.957	154.916			-14.466	63.72	-0.946	64.339	1.4	141.047	-26.524	-26.88	-10.515	56.904
149.333		126.577	36.198	134.342			-8.123	62.041	3.733	26.82	21.156	107.484	-19.742	-11.958	-3.168	24.429
149.467		-38.336	-48.057	113.519			5.498	103.159	-9.871	96.272	-29.514	139.965	-116.555	-83.08	20.284	20.315
149.6		33.587	-12.475	36.807			12.457	-29.292	-11.051	-12.125	2.254	154.274	-202.658	-11.326	3.051	91.298
149.733		73.339	-10.889	149.335			-0.831	80.67	-7.81	101.083	-0.359	144.983	56.175	-19.618	10.725	86.506
149.867		87.072	44.552	93.454			-24.834	98.428	14.657	61.421	12.768	183.304	-28.536	31.736	2.501	60.177
150		126.624	-35.134	35.799			104.426	191.446	-4.531	91.686	3.72	170.581	-51.597	-5.143	-8.22	49.19
150.133		83.47	-29.423	70.782			15.614	40.999	-9.542	83.034	2.648	130.827	82.979	20.712	-6.873	32.164
150.267		86.127	42.099	76.258			52.193	21.454	-11.323	134.235	-3.066	181.507	56.621	22.896	6.169	-44.145
150.4		51.787	-82.022	4.429			-60.18	21.201	0.101	110.661	-11.062	135.735	23.197	71.798	-1.386	35.755
150.533		55.419	-174.17	43.585			91.142	17.054	16.668	123.042	-3.565	150.075	109.708	144.882	1.56	1.626
150.667		110.45	-155.822	77.74			51.38	28.869	-16.565	176.173	-3.413	128.661	106.374	239.276	-1.084	133.785
150.8		82.58	-351.318	20.534			70.436	-6.374	21.087	181.432	-1.099	-25.805	93.884	-48.706	101.391	131.354
150.933		69.009	-127.148	42.433			58.114	10.696	3.364	249.581	0.684	247.849	193.5	24.539	58.289	149.691
151.067		109.19	-173.966	20.095			13.349	14.397	2.34	236.207	2.934	144.138	-185.698	7.185	50.332	97.232
151.2		18.176	-156.453	17.729			48.625	49.572	-15.937	228.616	13.496	154.854	108.478	2.684	52.353	138.212
151.333		10.09	-136.197	14.347			138.393	-15.064	5.555	238.547	-2.075	105.361	-14.652	18.971	20.715	109.018
151.467		17.131	-165.447	-33.651			-103.372	23.386	-5.703	154.908	-3.156	128.109	14.286	21.419	2.877	87.481
151.6		38.31	-114.091	18.474			47.437	15.395	-6.815	149.321	-8.047	126.657	-14.822	-13.951	29.912	106.777
151.733		186.939	-78.287	-4.213			115.228	52.468	-2.528	116.451	20.188	-27.751	-13.732	-26.343	11.765	104.889
151.867		20.441	6.036	-8.528			24.131	71.643	17.033	143.596	-6.886	64.923	8.909	-30.166	8.194	57.808
152		96.781	147.361	-5.731			61.608	95.06	-5.139	184.115	5.3	248.266	-237.351	125.565	-5.245	86.423
152.133		-24.115	-121.019	28.048			57.898	45.458	-9.158	254.17	2.771	115.062	-241.269	-95.099	-7.166	124.566
152.267		91.3	39.834	-6.781			24.671	63.627	7.265	121.827	-7.093	86.535	-187.63	-127.704	18.156	120.924
152.4		49.837	-7.831	3.419			41.696	81.159	3.856	157.838	8.881	101.091	-199.824	-107.26	15.026	140.863
152.533		43.87	77.816	-15.518			24.723	30.282	9.709	146.424	-0.426	128.131	-206.547	-251.355	-41.149	113.847
152.667		-10.661	189.291	7.62			13.128	-12.582	-28.581	160.239	-2.049	75.769	-63.491	-159.805	-45.69	109.648
152.8		-17.415	115.842	-18.127			18.651	89.78	3.211	123.224	4.499	108.716	-179.03	-183.777	-14.797	128.841
152.933		-13.649	245.767	39.199			19.906	24.483	11.243	122.112	-0.372	167.603	-21.813	-218.242	-4.874	137.69
153.067		24.115	96.353	20.04			-18.361	20.409	20.088	96.098	-0.221	120.674	-102.041	-245.471	-3.408	103.959
153.2		31.543	131.452	77.364			112.847	44.518	-22.959	124.02	-0.697	147.87	-77.811	-187.762	6.93	96.651
153.333		-9.154	155.067	8.634			26.967	-18.121	7.914	97.837	-2.35	150.32	-129.76	-143.731	24.633	100.9
153.467		15.472	-116.662	18.973			25.029	61.885	-22.852	123.974	4.981	103.896	-158.432	30.116	28.942	111.029
153.6		55.256	64.26	52.353			-94.181	48.369	27.63	175.007	-0.145	129.135	-100.596	-170.7	14.909	96.322
153.733		126.43	28.615	34.455			47.913	90.735	-10.901	120.658	-0.553	133.344	-74.931	-87.238	14.712	89.601
153.867		129.493	79.154	57.698			-6.161	13.209	9.904	123.774	-2.189	126.135	-215.84	-87.3	16.263	114.229
154		53.333	187.617	4.591			43.861	53.192	-0.985	60.181	0	87.963	-33.675	-108.168	-4.121	137.615
154.133		57.669	-60.235	6.03			38.788	83.145	14.179	51.428	0	135.962	-235.881	-142.442	12.856	186.427
154.267		36.205	45.667	28.775			62.58	63.666	-34.507	112.768	-0.43	122.127	-86.365	-76.046	14.507	134.741
154.4		45.277	193.649	54.937			45.292	107.906	-4.792	138.735	-0.695	92.642	7.85	-63.026	45.286	136.356
154.533		66.536	37.46	11.99			28.314	20.781	12.574	95.157	-2.312	127.016	-32.727	82.193	30.715	63.191
154.667		48.232	152.975	5.705			42.421	132.06	-6.015	132.446	0.384	118.408	53.366	18.474	-44.09	128.027
154.8		59.32	-59.988	63.111			26.034	104.822	7.043	99.354	-2.336	13.018	-14.523	130.867	-2.856	76.202
154.933		70.496	170.07	145.834			68.23	98.318	-3.055	120.16	-57.734	115.673	-4.729	158.074	-16.514	96.552
155.067		19.555	143.789	165.691			33.374	106.128	9.665	92.597	-75.471	148.601	22.247	19.214	-1.635	128.447
155.2		7.216	151.624	139.159			-1.068	85.041	-4.157	150.792	-84.61	145.427	5.477	101.988	-19.312	88.616
155.333		70.974	82.167	62.616			36.311	58.854	3.97	148.261	-33.958	141.79	-74.736	57.764	6.457	54.42
155.467		98.932	47.985	85.548			13.173	83.231	-25.54	148.735	-75.679	104.861	0.325	5.186	13.458	95.656
155.6		152.096	9.304	73.502			6.186	112.172	20.036	125.939	-47.245	122.508	116.064	33.046	15.939	30.266
155.733		85.322	8.141	85.073			5.944	111.074	21.156	155.433	-5.883	83.22	7.592	-87.851	-11.577	28.088
155.867		65.304	-11.44	70.402			4.475	126.581	-7.826	66.847	-3.503	122.782	-100.175	-12.407	10.429	60.808
156		132.448	9.735	100.819			-4.264	105.608	5.872	181.263	-4.661	127.521	78.263	33.473	-19.329	84.015
156.133		43.563	160.249	14.82			5.19	81.641	-22.93	92.529	-32.362	-24.961	-8.93	24.596	20.067	48.832
156.267		107.848	20.282	58.391			-20.682	101.233	-0.58	30.569	-7.92	95.903	7.132	58.917	6.214	28.11
156.4		78.446	5.992	84.382			18.02	115.26	-8.82	71.516	-73.126	73.2	35.665	138.245	-1.428	59.524
156.533		129.532	44.566	7.845			-12.882	78.654	-5.805	53.941	-32.489	163.016	-71.237	133.203	1.917	73.742
156.667		114.535	26.139	54.89			17.014	95.554	20.885	75.817	-18.535	90.725	22.699	70.765	-16.763	118.69
156.8		80.741	16.644	3.583			13.046	40.359	1.808	155.222	-37.311	104.299	101.116	84.643	-5.871	199.542
156.933		60.173	-49.656	22.225			-9.871	77.337	6.95	132.251	-7.544	198.094	-99.006	98.7	18.209	134.57
157.067		72.388	-200.673	29.953			16.683	3.464	-1.602	95.738	-4.197	154.753	77.419	136.051	-6.749	78.038
157.2		63.054	-306.602	25.116			-6.8	5.41	1.834	153.778	-32.059	97.4	17.463	106.337	5.679	106.569
157.333		19.723	-222.331	71.194			-7.529	-9.758	-6.155	211.782	-15.315	-8.171	-51.117	248.848	-15.052	132.628
157.467		3.323	-231.227	50.284			2.795	-62.109	17.757	250.629	-15.425	252.795	25.633	-82.258	19.023	85.175
157.6		-15.506	-229.715	93.832			-13.501	-119.641	-17.68	199.441	-9.848	136.76	176.467	142.545	-3.341	119.041
157.733		21.126	-262.019	75.608			-10.288	-213.901	-1.874	195.381	-47.917	137.077	46.301	118.054	-9.454	88.611
157.867		-9.992	-368.375	73.579			-9.671	-193.75	2.389	112.883	-5.496	135.326	57.012	120.114	-4.419	94.353
158		-7.573	-57.231	65.643			-9.349	-211.003	-0.51	97.161	-10.433	199.652	9.835	69.069	-5.163	83.257
158.133		-2.727	-222.979	31.205			-3.365	-291.797	12.784	71.114	-15.304	157.936	53.301	71.144	15.038	126.896
158.267		12.786	-162.368	26.784			-4.271	-265.399	7.295	68.069	-25.258	135.511	-19.117	204.433	-6.05	115.014
158.4		56.039	-85.375	26.63			20.071	-347.258	-2.946	211.369	8.877	97.209	65.349	85.364	-17.242	70.708
158.533		21.505	-31.019	-1.291			15.049	-304.816	-2.55	177.66	-6.269	30.978	-5.954	88.582	-2.489	63.594
158.667		78.893	-37.247	64.42			-13.158	-368.453	-7.988	155.206	-4.211	14.984	188.833	247.383	-0.288	80.103
158.8		69.077	22.917	40.32			-10.093	-152.693	-15.239	173.638	14.984	58.389	-26.885	-108.888	6.871	69.76
158.933		80.788	-29.647	29.235			-4.437	-222.591	15.077	133.614	-4.076	80.99	100.991	-35.412	-11.794	64.764
159.067		31.012	4.993	46.219			-2.55	-262.413	-17.961	120.328	-45.469	105.922	21.853	-20.972	-4.224	166.897
159.2		78.158	12.408	22.234			29.921	-274.148	27.675	99.628	4.034	86.295	-26.634	-110.759	24.391	93.221
159.333		24.156	4.919	28.882			14.561	-213.158	-3.147	64.448	-12.205	105.307	-40.761	-156.875	-7.241	133.399
159.467		-4.047	68.445	78.498			-6.909	-185.194	-6.76	-26.245	-6.815	136.06	-5.412	-240.412	32.864	180.659
159.6		-14.755	14.16	43.764			3.331	-244.402	-7.991	13.42	-5.509	131.226	-103.512	-301.736	3.029	58.195
159.733		6.694	12.942	54.15			-4.526	-252.965	6.553	-5.176	4.137	148.709	88.993	-208.023	18.753	29.906
159.867		17.612	13.936	25.253			13.686	-153.338	0.681	114.154	-12.374	158.017	-105.691	-153.625	31.053	40.787
160		-15.398	10.219	14.532			-16.727	-124.442	-1.23	176.926	-5.383	11.607	94.906	-209.678	-121.662	100.529
160.133		-44.506	52.437	67.03			34.951	-9.09	3.645	212.732	-12.874	214.419	187.882	-143.09	54.728	121.75
160.267		-65.985	-4.933	-8.044			-23.273	-35.439	5.223	133.151	11.301	126.309	61.497	-145.704	9.865	106.819
160.4		-49.031	29.27	28.626			-17.906	83.35	-9.425	138.722	14.17	111.243	-1.123	-155.648	40.766	141.428
160.533		-37.204	26.482	12.661			-21.593	-35.557	-11.447	75.818	8.038	135.825	-10.703	-137.011	57.062	117.838
160.667		-20.065	-6.584	25.427			13.606	-32.166	-5.523	27.877	4.604	95.078	104.175	-66.129	79.585	179.26
160.8		108.17	26.223	4.204			4.057	81.056	1.761	98.243	11.316	103.458	-103.698	-161.359	60.207	143.697
160.933		134.038	4.369	37.492			32.985	104.325	19.18	125.507	-11.98	121.392	120.241	-292.914	7.243	147.132
161.067		27.188	7.72	-64.836			3.357	138.884	2.104	129.031	3.258	123.678	-7.341	-64.332	3.28	198.88
161.2		20.232	-6.04	-169.239			-6.709	47.375	-4.188	213.47	13.864	77.765	-22.943	-167.904	34.069	199.716
161.333		18.421	21.213	-175.047			-18.032	22.688	-16.541	114.098	-4.514	4.098	8.36	-172.111	122.947	149.838
161.467		-15.092	-18.471	-298.332			18.49	-17.045	5.015	72.609	-7.733	182.029	1.608	-167.689	-26.283	155.537
161.6		-2.48	2.517	-248.617			-3.59	17.758	-0.545	29.641	-4.342	149.31	-140.531	-232.357	-3.18	162.264
161.733		18.911	-32.036	-309.703			-1.656	-12.445	2.681	-35.21	-11.634	131.618	101.064	-260.239	10.845	115.511
161.867		84.87	21.21	-206.896			-5.147	56.284	1.95	-47.522	-11.099	163.72	-165.878	-201.55	17.065	8.36
162		281.293	29.002	-116.789			2.877	-63.924	-0.431	10.75	21.853	134.668	199.32	-83.162	21.762	189.963
162.133		99.26	-22.386	-73.918			22.219	139.37	-1.666	58.225	2.838	105.232	-11.959	8.839	-14.421	56.788
162.267		86.435	37.7	-94.488			-11.464	97.151	-8.712	105.241	-4.477	118.307	-187.18	79.528	-12.802	-26.279
162.4		67.846	28.911	-38.985			-9.408	53.133	17.425	145.907	20.511	109.329	139.874	156.839	-49.717	-26.906
162.533		34.924	33.191	-20.422			-19.149	54.366	-8.416	123.085	-4.116	155.565	-220.09	82.393	-16.985	-22.054
162.667		35.601	-76.241	-80.791			-7.464	17.321	9.026	156.032	10.492	127.674	96.46	241.498	3.011	-67.501
162.8		23.598	117.567	-25.155			8.372	154.992	3.587	140.222	-2.584	140.604	-277.476	-97.038	9.436	-119.894
162.933		36.913	-25.256	-110.697			10.638	23.862	6.555	72.426	12.2	150.954	76.441	228.334	16.715	-152.198
163.067		44.819	-6.931	-155.783			14.696	4.885	-6.419	85.171	-10.187	122.67	-240.445	64.485	-10.361	-212.659
163.2		54.352	86.935	-154.882			2.784	11.911	8.084	35.173	10.11	127.729	-109.166	72.656	5.239	-214.345
163.333		7.482	114.786	-154.488			7.634	4.424	-8.601	29.759	-9.542	229.944	-280.045	127.278	4.193	-184.205
163.467		-5.795	138.601	-30.826			-42.477	72.509	7.874	-10.934	-2.575	141.259	32.587	89.924	-9.288	-255.948
163.6		7.596	-33.565	-53.32			11.345	116.173	-1.903	21.696	16.967	138.623	-118.346	79.132	20.309	-280.202
163.733		9.1	185.196	-58.945			-12.283	99.834	1.154	8.906	-1.116	167.821	-67.367	108.348	33.203	-253.029
163.867		-5.882	246.435	-73.81			-30.654	114.028	-1.886	-3.222	6.274	144.219	-141.563	173.163	3.901	-154.078
164		6.397	139.846	-128.19			-67.589	14.18	-4.208	-78.116	-9.76	1.746	-179.538	151.559	-119.402	-89.702
164.133		-2.606	66.606	-90.939			-21.811	203.435	5.548	58.273	2.62	274.835	-139.97	158.732	138.1	-61.193
164.267		-3.425	32.94	-59.427			-20.597	127.777	-1.418	-49.822	3.937	157.871	-106.113	142.615	-15.62	-244.561
164.4		-2.492	25.154	-20.895			-4.818	113.276	3.633	-21.121	1.915	136.464	-58.401	129.031	7.195	-212.652
164.533		-23.757	-28.364	-35.819			-60.662	111.969	1.482	37.936	10.487	96.902	-60.805	95.125	-9.439	-131.978
164.667		-51.058	-25.825	-23.995			-2.118	130.776	6.574	166.748	2.555	117.133	-61.109	124.914	-6.824	-93.382
164.8		-30.953	-27.994	10.279			-9.229	119.47	-11.882	175.49	-5.414	113.956	-130.59	105.211	17.774	111.501
164.933		127.83	-32.733	63.131			-10.274	67.13	-3.83	169.279	-2.168	127.667	-92.163	128.993	-5.165	287.385
165.067		41.347	-8.356	141.99			24.114	69.586	-11.745	55.098	3.015	128.806	-111.732	121.628	-4.12	264.145
165.2		44.501	47.168	146.97			-50.326	40.097	-2.752	51.936	-6.958	123.47	-100.53	143.912	-15.376	188.252
165.333		22.799	85.275	70.036			5.997	15.768	9.919	109.354	-7.624	-6.051	-95.999	134.555	-123.112	141.269
165.467		14.692	-11.864	121.537			40.405	38.018	2.765	107.366	-1.76	240.884	-67.764	120.859	116.8	110.923
165.6		2.232	-29.896	107.632			-15.036	24.003	-2.361	85.524	-3.612	125.448	-40.788	24.157	3.253	148.106
165.733		21.503	21.491	150.201			-17.308	21.428	-0.351	90.546	3.316	120.536	-60.464	118.514	10.91	97.283
165.867		40.464	-1.159	169.605			-81.019	59.909	-12.987	48.92	4.955	131.539	-11.69	194.786	-5.814	110.016
166		88.959	57.254	78.263			-60.108	130.275	2.064	24.424	-20.455	80.43	17.299	41.444	4.496	89.171
166.133		102.608	140.989	87.306			-106.924	142.551	-3.274	74.811	9.94	96.085	31.842	108.318	-13.385	116.444
166.267		137.801	140.541	119.133			-33.341	143.931	1.204	55.16	13.33	116.911	19.992	23.062	-2.685	148.581
166.4		73.029	149.497	86.269			-39.449	76.683	-2.114	153.842	-23.529	50.013	-2.964	75.213	-1.296	37.39
166.533		33.828	54.67	38.436			90.946	86.218	3.851	134.714	6.884	86.714	-3.479	206.03	11.987	109.559
166.667		31.111	6.143	77.394			6.704	6.88	12.083	97.535	5.827	-25.627	-4.118	124.259	12.293	124.847
166.8		-11.275	29.534	63.454			-82.359	212.75	4.3	75.052	-15.635	177.476	-68.364	-25.175	13.742	103.306
166.933		4.414	28.864	95.502			108.704	-26.965	7.809	21.133	5.301	66.89	-21.546	67.909	6.538	122.723
167.067		-3.134	-2.314	96.638			17.318	6.983	-6.465	4.656	7.895	78.297	29.809	8.304	-13.438	142.038
167.2		1.662	-35.157	33.19			-7.159	-13.97	-1.409	28.944	7.475	17.42	64.426	64.16	1.7	141.356
167.333		20.768	-131.943	109.068			0.779	-67.8	2.386	108.546	-9.91	94.226	72.798	85.338	1.416	118.426
167.467		-23.524	-91.131	99.168			-0.702	-198.296	-9.216	72.525	11.775	148.559	-27.85	63.564	-2.495	138.729
167.6		37.143	-278.756	2.865			-102.349	-249.211	-10.952	22.55	-29.823	129.755	226.191	75.496	-7.857	100.22
167.733		24.444	-258.218	95.629			119.844	-240.636	13.073	74.661	-14.055	164.89	73.535	66.295	10.048	8.773
167.867		94.415	-226.525	40.64			-5.567	-217.103	-12.259	96.314	-4.752	139.508	24.284	67.548	10.292	26.457
168		69.269	-240.568	47.358			-8.33	-252.722	12.154	44.118	-50.176	135.536	183.605	124.112	-243.869	25.566
168.133		51.073	-241.147	86.614			-17.031	-230.281	2.658	140.523	8.668	113.671	238.411	104.034	231.949	6.963
168.267		39.795	-245.307	28.549			-1.606	-246.279	-9.459	68.81	-6.138	90.87	77.944	-20.267	18.219	-4.447
168.4		13.645	-124.629	37.595			20.381	-165.287	9.825	97.776	-6.128	79.943	83.501	175.67	-1.973	8.856
168.533		0.145	-72.245	79.44			8.095	-176.514	-12.796	70.77	8.354	102.906	157.28	42.748	-0.324	136.456
168.667		44.415	-25.968	7.731			-10.466	-247.113	2.369	-9.437	-12.455	98.757	23.821	-61.002	-1.154	4.642
168.8		-21.737	-71.03	-21.88			2.11	-324.88	-1.423	37.124	-4.093	123.996	22.418	67.52	-1.084	25.42
168.933		41.094	40.812	58.55			-19.149	-215.908	0.952	61.435	-19.083	136.735	-108.242	66.916	-7.32	109.592
169.067		12.562	33.189	47.803			3.709	-252.028	8.596	56.675	20.186	85.659	181.45	84.452	6.337	163.643
169.2		23.879	156.798	-10.564			34.547	-248.727	-12.326	35.827	14.868	121.743	48.945	72.838	-24.908	109.601
169.333		77.588	248.016	24.023			-22.385	-246.344	18.186	-36.882	-8.548	141.428	46.094	248.031	11.031	130.208
169.467		127.672	-144.784	4.153			17.007	-204.597	-13.015	18.332	9.134	103.189	32.965	-134.698	-13.503	119.317
169.6		46.343	75.782	27.932			19.492	-195.374	2.953	32.078	-1.221	99.268	18.895	54.276	3.598	97.057
169.733		25.325	50.912	7.988			-0.203	-166.543	-0.915	48.97	2.393	133.062	50.234	168.348	-18.742	126.3
169.867		38.975	234.271	-18.51			-0.804	-93.77	-1.373	241.368	3.248	262.042	1.331	96.932	-4.676	85.339
170		54.303	41.232	49.736			-23.153	-164.104	-22.864	135.35	-1.263	123.487	19.361	-25.226	-12.129	45.015
170.133		15.437	40.085	22.657			-110.465	-39.944	12.601	111.713	17.271	159.414	42.277	146.612	-18.138	104.875
170.267		54.112	24.959	-115.743			103.439	-121.621	5.476	64.337	8.252	140.464	-99.2	73.525	15.631	105.221
170.4		82.606	-86.66	148.355			-10.141	-115.155	7.5	59.374	2.244	168.635	6.167	28.527	37.49	69.786
170.533		37.482	158.632	22.929			-3.652	-65.267	-18.184	63.138	-0.985	131.913	-1.382	60.786	-7.06	71.527
170.667		25.368	-20.683	25.457			6.894	-93.503	24.995	62.482	6.805	126.938	103.102	125.2	16.409	125.656
170.8		30.658	32.948	-7.52			4.522	-115.51	6.908	94.84	0.406	272.634	2.265	-73.28	33.3	-91.121
170.933		10.827	-15.055	-33.145			-3.211	-135.739	-20.165	36.01	-2.389	188.794	-3.265	37.064	2.611	10.311
171.067		3.295	97.442	-67.481			19.831	-102.39	2.203	54.972	-8.852	119.768	-138.79	10.298	13.828	80.771
171.2		15.277	10.238	-5.349			-23.977	-95.141	2.524	156.014	3.422	96.178	-75.647	49.503	-13.271	71.455
171.333		5.501	-130.687	22.641			-105.699	-128.108	18.836	77.178	4.868	98.787	-50.173	64.828	13.917	77.181
171.467		4.683	195.191	-3.003	0	0	-9.744	-181.916	-13.141	121.503	4.802	100.289	-222.322	11.01	-1.192	29.604
171.6		27.346	53.143	-6.864	148.231	-125.538	10.217	-134.564	3.092	92.997	-12.021	146.367	-205.908	122.308	15.614	17.511
171.733		92.122	11.516	14.498	154.887	-2.135	99.939	-272.849	-17.161	131.188	12.296	189.096	-333.343	50.886	-6.375	13.657
171.867		123.062	22.531	105.508	59.81	-74.773	0.902	-225.587	-1.094	91.213	13.581	125.664	-239.984	113.298	-10.718	1.96
172		158.27	59.4	138.083	87.229	-4.56	9.997	-359.248	4.484	45.091	28.533	-13.071	-242.732	123.637	-122.355	4.731
172.133		30.599	13.959	104.6	106.308	80.154	-27.687	-27.065	-5.288	84.788	-30.52	299.457	-104.575	34.061	104.271	43.213
172.267		76.823	4.822	66.979	42.477	-29.802	14.381	-258.578	5.51	90.866	2.494	102.578	-279.078	131.806	-2.747	114.221
172.4		71.557	-4.493	110.617	-3.338	-60.136	13.61	-227.056	23.241	97.348	3.603	130.006	-69.835	126.144	3.291	73.394
172.533		54.981	33.584	86.429	63.672	-93.375	-2.24	-264.796	-9.15	67.084	10.993	119.836	-120.937	122.26	7.99	93.758
172.667		88.557	-18.179	109.705	7.03	-133.252	-3.236	-135.611	-5.695	39.553	-1.518	100.33	-323.644	82.185	-3.465	123.053
172.8		77.666	25.663	163.734	10.441	-82.29	-23.008	-131.418	10.848	86.196	1.762	115.308	-185.528	116.329	5.93	122.604
172.933		31.167	27.408	41.98	24.288	-125.009	23.433	-40.858	1.165	133.04	-1.242	123.747	-215.983	74.283	1.297	102.278
173.067		77.956	21.75	73.788	-18.767	-62.417	-103.911	46.241	2.515	87.483	9.992	134.903	-246.011	98.579	10.477	91.066
173.2		33.08	6.165	64.189	59.678	-115.37	86.714	134.368	0.307	91.884	5.635	64.206	-242.88	80.027	-19.119	59.402
173.333		41.932	84.846	53.212	-3.506	128.821	-100.116	-23.291	1.207	58.46	18.114	176.844	-256.885	125.993	2.546	75.369
173.467		16.488	42.778	58.343	39.318	-109.974	-4.257	112.572	0.188	85.954	3.114	195.78	-25.684	42.183	1.08	78.876
173.6		0.949	45.088	73.21	114.377	38.923	-10.031	50.721	7.182	136.004	-4.259	215.237	-251.461	130.57	-6.165	78.243
173.733		-0.948	47.48	86.07	107.331	-17.142	23.319	8.297	-1.41	81.172	3.494	29.186	-162.952	84.005	7.142	106.717
173.867		-19.64	62.653	78.34	140.193	-15.957	-10.811	67.573	-7.672	33.068	-1.086	274.15	-92.212	131.762	-5.276	129.757
174		-33.914	10.337	46.351	-14.328	92.241	-12.768	16.892	-1.2	64.236	9.467	13.233	-136.507	-39.56	12.358	91.344
174.133		-48.748	53.332	86.26	83.23	-33.25	-21.133	59.83	-0.958	112.407	5.955	107.888	-107.95	207.266	-18.556	36.389
174.267		-28.954	71.796	110.416	6.677	-19.723	-127.527	110.007	1.723	89.294	-5.56	92.598	-109.715	4.527	-21.842	42.008
174.4		-29.219	88.266	85.904	4.433	-23.4	33.853	138.118	5.659	116.298	29.733	98.03	-12.266	178.302	-9.237	48.542
174.533		-38.17	25.56	75.676	23.58	22.812	-48.191	69.874	-2.452	65.507	-15.555	195.293	47.89	121.403	-3.494	46.113
174.667		-29.043	104.319	144.461	17.793	121.298	-65.238	128.578	27.929	71.281	-122.239	67.709	-8.645	124.663	10.965	-89.302
174.8		76.998	30.965	-7.577	24.648	-34.833	-46.618	137.133	-30.566	40.353	136.984	70.197	-20.226	-29.63	8.665	-77.321
174.933		12.082	33.494	15.147	17.671	45.043	-46.76	67.733	1.901	89.483	19.386	21.195	12.196	70.64	-5.891	-110.704
175.067		83.554	27.032	56.626	43.574	-18.565	-37.66	106.796	4.409	73.05	16.922	31.653	-71.068	109.451	10.705	-105.283
175.2		104.194	0.384	74.253	-13.038	134.876	-41.989	100.135	2.466	23.113	3.199	7.272	-21.553	115.308	-10.405	-206.26
175.333		41.847	2.58	52.824	14.961	83.622	-55.903	61.178	2.805	44.446	11.338	-13.161	1.079	82.078	7.166	-229.565
175.467		47.271	33.538	6.284	3.432	119.999	-130.309	92.648	-2.649	60.583	6.369	-1.62	-5.078	86.84	11.965	-186.004
175.6		35.704	-18.751	29.859	139.433	171.25	17.104	65.533	-8.147	111.015	12.254	-11.232	4.76	101.727	-11.24	-83.146
175.733		32.936	6.684	28.897	-38.4	92.99	-9.535	57.884	-1.131	75.242	9.54	-31.117	2.976	85.599	5.727	-148.791
175.867		127.744	11.841	57.664	154.079	88.973	4.056	44.483	4.183	57.341	30.459	-9.789	-10.506	62.079	-3.175	-180.52
176		129.104	-23.616	157.405	78.527	2.655	-39.807	54.481	-128.92	73.021	24.435	-19.575	-6.801	129.183	26.57	-255.216
176.133		-24.756	27.069	-81.315	26.655	-26.835	-11.341	24.332	129.062	54.599	60.284	-133.343	24.61	-49.528	-14.765	-255.411
176.267		61.689	10.335	60.134	22.459	44.327	-49.592	68.559	-17.219	91.225	4.124	-68.672	94.388	95.899	-19.881	-245.08
176.4		63.804	17.251	65.322	75.512	110.585	69.884	46.321	17.535	57.709	33.626	-34.257	154.99	81.028	3.727	-241.514
176.533		36.919	5.301	26.313	14.839	11.698	5.402	24.141	-7.838	68.973	2.8	-294.534	65.624	98.947	12.464	-276.63
176.667		98.989	5.097	27.908	-101.107	20.874	20.819	18.601	10.766	95.073	9.71	-231.821	-6.351	180.872	-9.984	-285.395
176.8		77.815	-16.369	-5.525	-8.665	-37.129	38.614	42.227	-4.96	74.38	13.592	-181.968	21.38	187.962	5.526	-263.688
176.933		75.701	-2.101	-3.416	115.932	84.698	21.731	34.999	-1.199	53.178	-3.674	-373.825	5.276	68.964	-7.354	-343.39
177.067		25.25	9.082	10.175	-86.792	115.654	47.251	24.153	-1.925	94.447	-1.151	-360.056	20.434	98.836	2.898	-413.768
177.2		55.069	40.885	-4.529	9.052	123.595	48.302	65.899	-4.205	78.957	9.685	-179.427	-18.225	19.438	4.208	-334.288
177.333		130.963	43.295	145.37	12.754	-6.963	29.147	42.338	123.154	30.374	28.252	-198.078	-67.543	127.87	-7.091	-227.272
177.467		49.665	7.283	-154.677	21.407	92.313	27.954	44.049	61.632	60.304	48.664	-164.337	46.348	-103.368	-8.555	-430.659
177.6		86.128	138.082	18.813	-11.524	58.364	-73.817	53.8	123.409	40.634	-2.891	-81.496	78.987	-7.567	-2.881	-247.425
177.733		-36.397	69.899	44.023	-2.453	65.58	20.858	71.328	43.742	47.71	-3.31	-36.189	18.032	-14.663	-1.377	-143.121
177.867		169.676	77.344	52.044	43.179	60.354	22.846	50.987	56.351	146.305	2.066	-25.817	38.786	-10.24	-5.964	-159.619
178		158.255	30.699	35.683	35.06	50.126	11.54	90.921	25.923	62.703	1.325	-4.432	74.252	-54.718	1.896	134.41
178.133		150.262	-8.105	16.206	17.772	60.912	20.642	85.395	42.47	98.547	-0.869	62.964	94.378	-10.558	9.455	1.627
178.267		-51.727	6.713	10.046	5.727	32.526	15.932	56.222	38.66	116.513	1.246	93.961	88.512	19.797	10.262	13.157
178.4		80.036	2.547	18.635	-24.999	33.44	18.249	41.817	25.808	73.505	-2.702	118.058	89.915	118.054	-2.789	26.769
178.533		46.102	5.127	-2.445	62.671	-5.686	-13.113	43.769	22.383	108.063	-0.825	86.252	59.59	-6.942	3.667	-1.575
178.667		21.444	13.162	3.446	17.49	-18.223	7.892	-26.708	-22.795	66.766	-3.854	226.783	22.563	50.816	-122.338	53.415
178.8		-20.911	-41.39	14.465	53.314	22.785	-1.922	177.039	21.189	115.139	1.363	129.666	-2.014	33.863	143.24	25.369
178.933		-13.131	-32.971	9.554	75.66	19.067	115.15	42.181	21.542	57.18	-1.17	104.874	9.762	-3.421	-0.379	23.261
179.067		-22.201	-12.361	-6.789	19.085	22.528	7.324	43.777	-6.677	86.976	-0.522	109.353	28.882	-21.047	-1.573	-14.547
179.2		-44.583	7.974	14.009	32.667	24.946	2.577	61.507	-4.086	96.47	14.873	45.23	-10.925	18.13	-18.446	20.639
179.333	-31.279	100.593	-19.438	-28.967	5.459	34.779	5.663	-0.571	1.748	95.896	0.86	26.32	15.321	-39.198	6.369	181.053
179.467	2.616	9.436	39.612	-0.769	22.256	60.975	-11.615	108.136	-15.949	74.567	-4.726	45.194	79.02	-53.735	-17.254	94.912
179.6	254.616	-4.416	159.899	-36.188	24.73	87.536	-105.772	56.612	13.092	96.421	-1.337	10.917	77.706	-84.979	5.264	84.166
179.733	11.173	71.383	196.033	30.723	43.494	33.789	-1.009	32.836	5.58	63.839	-1.294	34.916	75.166	-69.451	2.786	94.746
179.867	127.932	197.785	122.164	8.591	54.051	90.952	-13.78	58.819	-14.721	84.917	-3.598	42.972	101.673	-90.762	-1.769	63.103
180	254.153	-9.311	-7.01	-9.988	-21.56	123.445	-10.597	-14.334	23.023	75.358	-3.012	-21.164	188.952	-126.569	-3.605	170.71
180.133	129.793	39.372	17.265	-13.183	35.983	39.985	12.678	126.105	-21.955	101.057	-14.198	76.417	-78.186	-216.166	6.901	63.886
180.267	-21.175	105.323	-39.076	-46.327	8.775	50.562	-48.055	10.527	-4.036	197.183	-7.511	14.085	9.387	-135.148	4.186	14.422
180.4	254.241	66.763	-52.644	-24.406	28.233	90.777	-18.747	109.416	-2.174	131.354	-2.144	80.502	58.399	-108.32	-14.225	111.125
180.533	255.46	91.733	-47.062	-54.16	-18.821	54.547	-24.055	98.021	-13.986	94.024	2.451	61.558	117.815	-85.922	12.139	158.423
180.667	254.118	95.728	23.917	-100.987	-12.89	85.03	-1.37	98.323	-3.749	107.265	-10.468	17.99	58.33	-66.973	15.213	145.469
180.8	255.021	233.775	7.398	-144.4	53.829	64.568	9.09	56.132	4.408	127.176	-3.092	22.754	77.409	-128.723	-11.308	140.664
180.933	-4.176	20.233	76.424	-204.614	21.131	7.205	4.839	104.369	-14.852	82.673	-4.263	-14.16	220.464	-13.912	10.007	16.059
181.067	382.625	225.019	34.868	-151.998	-9.716	32.773	-34.231	101.285	-6.697	132.016	1.035	5.204	75.601	30.749	-18.903	123.201
181.2	166.045	67.827	-11.086	-179.269	19.565	10.132	87.3	89.787	-11.174	130.105	-13.269	29.568	124.202	23.332	-5.187	150.363
181.333	223.456	53.543	-35.5	-128.977	22.301	46.008	-158.344	122.697	16.24	60.261	6.464	31.057	128.427	28.726	-4.18	227.037
181.467	270.565	57.45	55.812	-49.741	12.275	-14.708	86.244	19.95	-33.949	112.818	-2.026	8.563	79.041	-70.922	-4.384	-35.358
181.6	274.442	61.469	153.726	-60.467	-12.502	-17.034	-46.69	78.985	-0.417	104.69	3.676	-21.064	53.597	-91.51	9.415	85.349
181.733	251.327	44.975	21.206	-146.043	17.561	1.735	-216.845	75.362	-2.302	150.17	-1.382	29.299	55.203	-77.52	-6.829	80.059
181.867	245.463	-34.989	54.013	-194.238	23.023	19.147	-96.903	76.414	-17.63	102.654	-21.797	-15.011	54.341	-24.147	5.335	93.072
182	275.219	-13.753	-16.726	-103.483	6.404	18.068	-105.783	104.433	31.95	78.259	-1.476	14.904	-100.077	-150.672	-1.331	75.228
182.133	273.382	18.167	29.023	-77.627	-85.877	21.677	-99.158	97.374	-2.434	68.336	-16.32	21.513	109.937	-45.623	9.559	106.177
182.267	188.912	-13.216	36.769	-121.382	-131.68	32.12	-68.673	123.187	-21.96	71.051	-32.937	-6.32	39.463	-147.131	-11.17	59.115
182.4	115.635	30.987	5.358	-77.979	-168.637	61.848	-111.299	87.354	-10.361	107.91	-46.765	32.434	12.889	-89.269	-155.894	158.129
182.533	134.111	61.663	22.545	-35.869	-145.984	83.44	-21.318	134.631	-5.725	64.52	-48.797	48.387	30.713	-19.947	-32.86	105.277
182.667	129.232	54.786	-62.447	-6.51	-157.342	24.522	-86.133	246.632	-34.621	29.54	-34.902	8.582	47.376	121.618	-66.467	37.678
182.8	137.92	-2.532	-46.336	9.099	-106.28	136.473	4.551	-97.027	-41.747	69.558	-76.742	-46.22	7.805	-64.196	2.831	104.238
182.933	89.064	12.501	44.002	53.897	-119.776	54.78	13.163	119.589	-32.016	46.608	-85.835	18.082	46.03	60.541	-16.101	40.268
183.067	191.966	28.763	6.974	70.536	-96.781	74.19	14.564	129.47	-63.022	110.611	-47.73	-2.259	3.161	140.316	-3.742	39.562
183.2	181.583	17.426	30.317	-15.386	-108.261	15.152	3.07	77.949	-42.71	108.839	5.326	6.097	-85.458	80.824	9.499	68.727
183.333	82.068	11.913	-60.277	44.415	-143.086	38.766	0.192	85.456	-50.009	73.348	3.243	7.184	112.602	119.835	-3.394	143.859
183.467	113.37	38.796	-109.906	88.129	-95.636	12.046	-7.821	21.394	-28.942	78.515	-17.174	40.747	108.216	40.448	10.458	121.212
183.6	190.291	64.12	-106.541	49.48	-121.763	-7.373	-36.694	5.204	-43.176	98.347	2.473	-3.262	81.841	47.785	-9.999	133.513
183.733	190.365	-6.064	-151.861	44.66	-119.112	13.488	16.246	25.865	-60.208	84.411	12.209	22.94	51.536	52.514	12.986	132.934
183.867	195.022	-56.379	-189.96	71.524	-202.799	27.927	-30.942	5.83	-43.058	47.29	2.033	37.696	115.249	44.105	33.678	58.864
184	130.335	23.741	-224.224	43.702	-293.571	34.503	-10.08	126.811	5.242	38.119	16.603	-24.849	75.99	238.034	-37.783	102.696
184.133	129.007	11.907	-226.101	23.347	-69.928	79.051	-43.881	-57.683	1.474	99.528	-36.446	-23.119	67.767	-134.352	12.443	111.325
184.267	126.324	-3.402	-232.647	70.884	-122.972	52.091	20.699	57.455	20.706	108.351	-28.506	-26.436	42.174	168.177	-1.275	106.901
184.4	157.694	-11.847	-180.016	45.049	-102.085	48	-85.904	19.945	20.499	76.128	-7.211	2.368	31.83	197.517	17.112	132
184.533	161.173	111.653	-199.029	111.43	-44.713	75.027	116.868	23.746	20.327	74.343	-3.107	-18.702	73.106	126.57	6.781	154.285
184.667	162.508	59.646	-119.307	84.438	-56.455	34.72	10.411	21.088	51.68	67.841	2.217	-27.787	-56.186	29.271	-1.499	156.759
184.8	128.404	-67.085	-139.939	39.665	-36.608	28.786	15.641	30.466	15.306	88.719	-3.343	-21.537	59.364	44.689	3.49	141.11
184.933	227.264	40.395	-113.436	71.645	-61.123	17.045	-27.713	33.127	-26.262	129.426	-3.957	-36.29	18.854	43.582	-24.639	94.963
185.067	183.356	10.766	-147.202	40.778	-47.935	32.766	-9.209	79.153	-8.77	42.026	-6.362	-7.501	29.567	32.975	8.353	96.577
185.2	208.044	-11.541	-82.899	48.499	-47.361	2.202	16.125	98.147	-29.535	-8.228	-13.783	-17.175	16.294	23.351	-7.142	88.844
185.333	263.933	9.495	-34.238	81.782	2.246	-3.377	14.188	9.762	8.211	92.272	-8.49	-24.07	57.478	-5.218	4.01	100.34
185.467	251.443	72.198	-83.431	26.046	-124.606	5.087	19.813	14.952	-0.915	23.801	7.913	-11.818	-17.64	31.666	92.534	55.404
185.6	253.892	86.985	-82.296	42.484	-34.776	-10.687	-25.722	36.484	-12.027	60.671	2.55	23.857	27.418	14.162	-64.079	72.842
185.733	147.135	104.108	29.767	26.967	-58.912	40.78	-115.272	49.036	7.315	120.223	6.393	34.279	5.952	14.444	-3.518	110.523
185.867	136.116	32.187	36.083	8.544	-121.402	13.553	54.462	8.533	9.106	85.936	-0.349	-16.713	49.105	32.95	6.556	159.739
186	82.862	10.284	-117.99	39.423	-111.169	11.339	82.308	31.214	19.439	55.979	11.065	-18.253	73.773	259.085	24.962	110.056
186.133	81.33	46.381	57.863	68.433	-121.275	3.405	54.091	-2.556	17.575	79.157	-12.746	-77.781	14.571	77.096	-25.603	89.74
186.267	82.874	-26.811	133.514	79.588	-43.519	32.576	15.698	2.564	1.942	111.637	3.065	-264.702	-12.413	115.33	13.002	129.149
186.4	47.72	78.97	115.146	25.093	-35.73	13.726	-37.504	-6.58	2.505	88.872	12.369	-160.533	43.488	95.749	-69.617	85.163
186.533	34.364	129.152	201.311	55.716	-21.081	28.381	11.079	-163.935	-10.701	68.597	0.662	-37.133	75.005	62.983	111.09	85.69
186.667	130.713	175.675	-38.217	16.091	-115.714	-37.689	17.214	-125.579	22.059	101.435	11.999	-12.488	218.48	73.086	-46.492	57.132
186.8	105.771	62.856	188.129	40.423	-109.828	48.312	94.72	-140.428	31.868	58.071	7.684	68.113	40.693	183.553	-3.161	85.608
186.933	88.392	70.413	101.086	99.243	-152.939	-14.956	51.578	-136.753	7.624	55.695	-4.067	-37.099	50.606	109.351	56.316	85.495
187.067	-58.084	8.243	-7.153	98.583	-116.978	1.672	59.433	-134.779	-3.3	87.829	-2.67	90.744	78.011	53.803	-3.738	92.531
187.2	-184.777	-12.884	57.435	66.941	-166.817	14.302	31.463	-169.517	-4.257	94.177	23.334	68.92	-78.983	52.722	-0.767	87.601
187.333	-201.174	53.784	94.588	6.237	-159.208	-20.574	10.531	-193.158	17.945	137.059	0.864	15.104	170.24	-78.789	-1.323	35.067
187.467	-218.083	8.902	87.176	24.202	-123.286	13.178	10.239	-192.739	27.214	74.29	0.825	23.337	59.512	69.494	8.886	-40.804
187.6	-289.226	125.026	18.414	18.632	-128.747	5.765	20.214	-271.358	3.832	27.377	4.697	12.811	50.028	17.138	15.237	53.705
187.733	-255.565	127.944	23.076	53.64	-134.693	111.942	35.767	-249.962	25.907	90.367	3.103	-16.264	50.225	-15.515	-15.141	50.59
187.867	-291.233	123.627	38.366	26.764	-104.171	18.449	-1.094	-322.262	8.534	44.718	0.223	25.717	-76.789	-133.511	11.552	81.005
188	-245.638	254.314	89.217	148.948	-44.979	-0.843	22.323	-371.649	-117.302	98.693	2.209	15.91	263.977	246.201	-100.521	112.338
188.133	-252.315	-94.611	-7.091	16.548	-48.956	-74.317	-2.971	-162.546	118.701	93.782	5.921	39.436	150.974	-86.303	-5.454	51.02
188.267	-288.744	23.427	-31.701	23.463	-85.838	4.535	34.752	-203.267	17.995	130.293	1.577	97.368	142.202	13.582	104.559	90.989
188.4	-275.331	-8.195	91.235	71.271	-116.02	-42.077	25.292	-176.564	-1.455	85.715	2.534	28.424	133.566	7.678	-8.592	131.378
188.533	-296.02	78.589	14.228	27.295	-30.987	-12.063	44.88	-206.963	-16.038	80.929	0.169	23.841	42.34	22.69	-59.962	139.869
188.667	-213.773	61.639	10.763	9.64	23.684	137.985	54.82	-163.788	-0.6	93.028	22.474	16.163	58.586	30.071	-7.166	102.279
188.8	-312.975	17.034	5.268	29.069	79.115	17.852	48.336	-124.002	-5.275	77.66	-13.099	16.293	83.846	13.37	78.811	143.438
188.933	-342.057	11.734	5.158	41.148	57.233	93.297	30.046	-179.381	9.194	106.145	15.007	36.427	81.512	-4.843	-125.928	134.167
189.067	-334.97	-11.444	10.447	39.844	56.464	44.246	-0.388	-190.662	37.252	81.005	2.373	35.978	100.29	6.124	-6.178	113.702
189.2	-288.051	22.685	12.359	10.897	57.57	26.493	22.933	-172.566	-6.986	73.331	0.329	52.187	120.773	-7.318	-34.391	122.082
189.333	-194.752	253.919	8.632	31.4	104.704	56.923	19.607	-130.265	23.206	109.698	34.653	66.312	112.824	31.233	-74.338	142.547
189.467	-81.416	-195.006	87.362	19.323	94.938	11.51	5.533	-161.717	1.956	127.116	-35.69	58.426	52.137	-34.666	-69.834	160.055
189.6	46.02	87.511	117.542	44.558	120.191	-49.199	-6.052	-390.17	3.879	53.332	-0.992	106.614	121.721	-17.773	-75.857	149.662
189.733	89.97	92.009	-16.805	45.612	109.147	104.416	16.14	-294.909	3.825	83.172	6.154	83.849	96.171	-20.976	-68.527	169.723
189.867	151.586	57.86	30.085	67.473	95.516	-2.759	19.748	-323.658	-1.866	104.205	5.862	80.349	94.993	19.447	-20.171	106.722
190	150.484	21.821	18.687	-16.579	57.15	21.813	-17.052	-131.253	-3.612	100.965	6.622	106.287	69.312	-4.023	14.099	10.659
190.133	155.413	57.192	-4.007	34.678	49.326	2.686	33.458	-212.387	21.083	91.784	-2.327	44.935	52.375	0.802	-3.344	112.661
190.267	99.422	97.344	48.02	5.419	74.203	14.355	3.667	-235.996	-13.837	117.047	3.194	5.673	98.308	-1.109	111.322	116.127
190.4	112.825	102.055	16.216	-3.395	21.726	11.596	27.07	-182.139	20.143	65.575	-2.004	68.278	90.067	3.16	24.018	137.084
190.533	200.605	63.841	-6.068	-5.914	-8.823	-1.888	27.469	-175.388	-5.437	106.527	15.297	101.969	47.951	-18.231	10.083	117.384
190.667	234.829	128.877	27.668	8.596	56.931	5.12	-7.973	-366.178	-123.584	93.705	2.976	71.329	78.598	125.641	-42.752	-47.334
190.8	215.801	-100.527	43.679	-2.984	-16.613	3.14	16.925	106.368	139.503	22.202	0.642	88.54	58.584	-143.462	18.051	216.016
190.933	266.679	-7.786	25.597	-11.977	26.839	-4.594	-17.448	-34.61	-17.854	30.959	0.83	77.114	117.791	-2.998	50.993	50.098
191.067	281.333	6.374	-2.282	-13.7	-15.236	8.16	-8.378	-31.449	19.182	49.895	-9.021	61.451	80.218	18.733	10.035	35.416
191.2	262.072	-17.877	18.669	22.924	9.392	-35.487	25.598	-47.343	-11.778	-4.723	-2.19	29.098	40.524	9.055	22.296	21.219
191.333	219.724	-6.336	7.288	24.132	8.229	7.924	27.25	-70.461	1.542	37.828	1.154	23.218	130.364	-20.112	-0.825	-5.821
191.467	232.703	10.115	-22.818	37.898	56.278	16.567	45.786	-68.513	8.744	62.842	14.478	2.552	70.013	-119.28	-13.966	16.76
191.6	300.251	4.941	-26.016	11.257	65.479	49.149	26.128	-70.616	8.736	78.246	3.511	28.209	72.993	-7.043	-6.952	-14.467
191.733	256.858	-9.894	31.039	45.336	105.459	15.657	75.386	-51.514	-5.93	36.264	-2.19	-7.823	76.093	109.491	-9.332	28.156
191.867	243.825	14.558	39.229	23.74	98.691	-36.477	34.731	-37.602	-10.775	107.536	1.846	89.515	40.834	-30.97	2.117	-6.117
192	259.634	129.117	155.887	156.71	22.551	81.701	43.964	-121.948	24.207	89.16	12.176	9.065	61.487	-18.992	4.399	9.97
192.133	102.686	-133.609	-67.837	329.665	29.403	-2.078	14.389	-122.165	37.84	44.738	-1.102	8.474	112.557	-128.273	0.434	21.744
192.267	209.633	1.252	28.087	26.403	20.257	36.566	32.07	123.013	5.684	149.888	2.105	27.349	64.997	-73.114	8.623	6.735
192.4	151.977	-67.544	79.297	-3.927	12.643	-2.355	18.792	-122.825	-6.14	106.721	8.997	6.03	93.52	-196.753	1.898	99.431
192.533	205.552	-228.34	56.897	17.619	-1.805	14.746	53.178	-25.459	25.37	122.239	-0.866	-7.381	57.403	-143.637	0.77	92.595
192.667	160.668	-287.222	38.885	-8.871	23.922	1.636	2.52	-241.582	-1.317	115.125	-1.178	14.027	49.682	-196.201	-25.615	0.761
192.8	131.105	-326.91	16.095	14.565	9.253	16.92	-28.995	15.015	0.825	94.005	-4.18	-33.012	51.38	-68.699	3.907	27.925
192.933	179.001	-291.695	8.276	-8.196	49.989	-12.312	25.058	-244.389	-7.328	109.667	-2.949	-17.301	46.346	24.205	2.172	-16.665
193.067	200.551	-253.456	15.992	-11.998	32.516	-18.627	38.035	-123.061	7.377	108.19	-3.99	-111.854	59.066	-175.835	-7.421	-34.897
193.2	229.771	-185.011	-8.785	-24.496	18.633	-9.03	74.674	4.272	-0.729	113.521	-2.173	-145.241	23.182	-169.525	71.246	-24.394
193.333	391.203	9.01	68.089	-34.382	-7.388	-127.894	51.523	-245.128	13.664	37.566	9.466	-184.454	30.933	-157.894	-100.387	-157.813
193.467	239.838	-131.374	68.876	-421.161	38.694	34.543	9.606	-254.376	-20.695	67.359	3.334	-261.104	10.407	-93.278	17.755	-261.824
193.6	242.709	-104.124	-0.763	429.546	13.083	100.557	42.196	-175.736	-2.953	103.625	2.216	-316.989	-7.81	-99.175	-5.015	-203.736
193.733	240.247	-59.372	17.948	23.971	44.744	4.507	19.208	-202.773	15.927	55.252	1.604	-293.187	30.381	-162.922	-28.916	-209.13
193.867	194.85	-137.052	-8.129	-3.517	-9.318	-9.882	33.203	-234.352	13.177	94.063	9.678	-125.816	34.519	-68.539	4.878	-236.498
194	191.111	-201.26	-2.587	34.64	-24.811	-15.246	30.334	-315.627	-6.97	114.612	-7.344	-137.102	20.403	-85.377	-20.578	-169.989
194.133	210.738	-149.11	5.825	32.105	19.189	79.977	14.417	-239.395	23.323	90.609	5.533	-77.979	31.666	-107.838	17.973	-108.672
194.267	179.678	-168.415	-5.65	5.591	-69.758	83.906	17.381	-285.636	-1.002	75.37	0.88	-103.676	9.105	-41.093	-2.815	-85.344
194.4	90.182	-158.988	-18.731	-9.96	-18.773	-20.859	49.276	-238.208	8.533	47.226	6.071	-82.633	25.325	-71.586	-26.53	-125.5
194.533	250.622	-132.571	-11.211	6.695	-122.605	152.361	-7.002	-259.657	-2.37	101.485	35.569	-141.176	-6.938	6.807	-2.747	-179.268
194.667	130.982	-154.321	44.832	288.067	-262.644	-127.348	15.019	-283.779	26.55	112.89	12.926	-111.116	68.051	-10.783	4.213	-18.163
194.8	229.809	-55.603	-46.997	-146.689	-268.626	219.581	16.888	-69.879	32.997	133.905	-39.987	-35.543	50.173	14.901	-1.085	84.117
194.933	261.195	-37.004	15.552	31.891	-182.144	-1.195	48.308	-129.812	6.22	75.529	-8.444	-33.735	17.228	39.225	-8.462	144.807
195.067	205.914	161.553	16.281	29.616	-154.462	14.39	85.783	-50.593	-4.974	154.58	-4.272	-47.764	7.363	91.258	-17.138	226.555
195.2	251.146	67.338	-7.192	7.485	-138.03	40.274	42.389	31.717	17.953	99.362	19.341	-50.559	5.232	125.719	-0.818	164.62
195.333	227.502	115.49	-6.248	28.893	-121.95	51.628	69.066	21.424	-14.547	156.623	1.604	42.699	123.708	75.079	-16.077	134.331
195.467	144.235	115.389	-21.812	7.401	-35.847	27.127	27.198	-12.26	15.303	106.254	5.987	63.881	56.861	76.992	-10.155	101.554
195.6	176.152	108.031	27.344	2.871	-33.655	-22.392	44.01	38.885	-12.398	72.772	49.695	248.885	89.762	53.86	11.827	91.145
195.733	165.697	100.14	-5.251	-58.674	-2.372	66.805	33.311	46.436	17.316	-40.044	3.78	257.961	71.717	-6.762	-13.996	92.162
195.867	234.005	140.004	-9.878	40.488	-50.952	13.344	11.278	61.861	-9.408	88.189	-55.811	52.262	87.041	42.731	-2.148	89.047
196	136.606	150.768	49.002	33.718	14.128	-129.706	11.369	-27.684	8.264	104.895	25.684	143.902	36.055	133.974	-18.351	179.24
196.133	90.486	130.86	-183.514	71.082	52.41	245.051	14.827	123.215	6.555	79.533	27.177	238.593	33.725	91.157	-6.365	110.057
196.267	62.255	93.269	-233.031	42.33	41.9	-2.752	34.015	80.998	8.746	105.166	-14.171	12.943	54.885	38.663	-7.103	77.67
196.4	65.409	97.569	-214.698	50.223	28.582	-102.014	31.216	-52.836	-2.482	108.81	3.278	23.526	52.74	53.746	-11.985	-27.375
196.533	24.463	60.32	-192.112	67.688	64.374	0.431	64.06	47.888	-2.528	184.74	13.996	24.057	-51.603	45.662	-16.948	21.873
196.667	-19.401	83.444	-186.343	87.791	50.585	105.647	52.497	29.352	-10.411	234.288	3.004	-2.368	99.244	36.354	-21.994	-20.215
196.8	18.54	86.901	-183.677	55.545	43.013	-14.906	37.716	59.799	24.567	110.923	-6.778	8.808	7.82	57.704	-18.183	18.727
196.933	10.73	135.46	-127.733	-45.215	65.341	66.283	-27.939	47.826	-5.463	59.967	2.141	15.522	-10.939	170.431	-54.54	67.35
197.067	-89.664	102.743	-190.741	-49.156	57.747	80.926	-22.498	138.527	0.772	27.475	-0.341	-19.282	48.466	11.024	-25.401	86.638
197.2	-251.959	-5.789	-155.952	18.957	27.583	77.16	2.387	94.326	-2.577	62.035	3.901	65.15	101.646	67.683	-14.054	148.851
197.333	-130.177	2.36	-18.036	10.348	36.581	136.387	36.059	250.234	-123.094	41.91	-123.494	6.089	35.21	6.059	0.951	31.034
197.467	-406.719	86.954	-269.62	37.692	118.082	99.422	-5.87	-5.875	119.766	64.925	138.18	74.647	23.285	21.999	0.974	-18.304
197.6	-179.878	133.048	-60.482	67.401	166.811	75.979	25.208	163.465	-7.602	56.424	14.979	13.479	36.435	-58.652	130.423	-29.241
197.733	-240.122	135.683	-122.897	78.487	97.158	-27.021	-8.466	125.941	0.934	52.392	35.109	-41.936	70.897	-29.308	-136.58	6.444
197.867	-293.47	133.866	-163.126	51.239	131.323	73.254	54.712	258.519	10.483	18.038	5.301	-37.96	75.257	41.696	-11.65	29.466
198	-155.89	101.733	-65.653	87.212	65.798	3.373	35.669	313.398	6.903	55.465	-10.16	111.253	82.552	-79.054	-14.757	47.294
198.133	-142.567	121.13	-74.73	59.092	84.777	23.257	1.972	164.271	-1.007	6.871	46.504	40.809	82.109	123.553	-23.55	153.843
198.267	-176.008	130.463	-30.414	79.258	38.332	49.438	-13.588	176.471	1.477	-17.736	8.534	31.038	-65.562	-29.384	-5.303	76.147
198.4	-284.815	102.359	-27.643	25.382	45.554	7.343	54.201	155.641	-8.213	8.136	-14.987	16.224	120.764	52.579	4.244	111.301
198.533	-239.174	102.847	-87.512	15.571	-36.684	31.139	-4.664	221.421	-1.432	46.009	4.819	9.369	14.112	-13.019	5.877	69.524
198.667	-251.839	126.151	2.635	65.845	-31.672	4.633	-12.312	-18.289	-123.111	49.235	12.395	-7.51	172.983	8.374	8.843	64.563
198.8	-213.716	168.368	-74.387	66.092	-29.335	16.235	-6.327	386.959	136.023	14.385	3.687	22.25	130.494	19.262	113.176	107.672
198.933	-0.507	98.497	44.233	31.945	25.463	-35.678	16.017	139.147	-3.668	24.216	-6.01	23.322	130.034	83.187	-115.31	145.934
199.067	104.547	102.1	45.655	52.605	-2.295	21.448	-15.048	137.596	3.016	46.527	-17.952	64.185	87.197	147.013	-1.052	16.659
199.2	209.156	100.091	30.996	64.418	53.347	12.863	-7.425	138.804	0.09	8.425	-3.79	97.308	73.344	81.998	4.102	36.148
199.333	249.028	77.882	87.04	50.276	107.491	54.349	-6.586	180.994	-5.203	17.062	17.001	43.054	160.825	34.22	-13.735	6.912
199.467	198.408	140.921	-1.223	66.999	22.962	-95.458	-14.477	154.128	20.043	1.281	6.734	56.08	63.568	54.16	-9.233	-65.69
199.6	215.966	114.387	-17.948	53.319	-8.541	63.975	32.57	179.619	2.432	-33.663	13.705	36.904	8.23	15.174	-3.858	57.033
199.733	178.913	96.509	-20.472	70.326	50.974	3.436	36.809	191.989	0.96	9.717	-1.779	-12.19	237.738	25.16	4.178	79.485
199.867	204.684	100.596	35.655	58.15	-17.351	-1.318	7.784	134.149	-28.242	-0.753	-0.572	124.994	55.89	11.12	11.036	62.998
200	247.258	128.21	163.34	142.935	-1.406	-76.51	17.306	-6.004	-120.085	-12.385	22.352	121.519	138.601	-23.744	2.98	14.351
200.133	308.014	33.996	-142.74	75.419	-325.742	12.211	10.806	240.583	133.098	-20.531	-5.204	167.154	99.964	56.185	15.092	-17.309
200.267	253.34	90.063	9.144	117.658	-228.765	62.856	0.244	49.329	12.535	17.199	-1.793	4.287	71.132	-6.499	-6.583	49.52
200.4	284.122	100.278	18.814	41.713	-215.185	37.939	-1.689	94.653	-1.271	25.502	4.411	17.745	13.886	-8.514	29.417	34.74
200.533	275.714	97.674	22.924	87.773	-245.88	171.542	14.645	132.787	-4.469	-9.574	6.506	-21.184	-79.547	12.641	-11.791	-74.456
200.667	358.837	90.556	29.952	86.958	-227.571	49.808	13.684	135.307	2.273	19.439	29.557	4.34	89.189	19.454	11.438	-50.4
200.8	228.411	50.114	25.515	80.972	-218.393	-66.117	33.309	123.774	0.302	-38.181	22.57	-20.516	41.32	-5.651	-10.141	13.761
200.933	312.193	81.241	84.564	22.722	-171.78	13.156	8.386	106.148	-1.687	14.46	3.71	-103.018	29.515	16.688	14.636	48.799
201.067	291.759	84.236	79.875	45.395	-131.825	22.146	9.693	68.495	6.026	4.57	10.64	-214.785	-70.054	9.269	-3.562	120.963
201.2	113.4	68.003	-69.222	70.558	-146.02	-2.52	30.901	77.972	-3.238	-11.816	-18.211	-244.189	-11.869	5.037	6.377	104.27
201.333	252.675	128.095	159.836	151.736	-145.732	-126.67	25.218	108.907	-11.794	-45.494	-6.55	-268.05	63.925	-4.443	24.267	132.173
201.467	211.052	-30.435	-30.879	-45.11	4.693	121.637	56.148	88.358	-4.751	35.163	18.953	-268.624	77.17	-1.334	3.739	108.566
201.6	250.854	33.001	60.589	89.868	-122.576	81.686	32.546	107.638	-31.985	23.034	-19.551	-216.479	-16.482	14.883	11.304	52.936
201.733	348.249	79.325	19.058	53.591	-88.03	25.555	34.411	74.889	-36.991	-5.661	49.586	-117.717	-105.507	3.483	4.848	29.926
201.867	262.537	104.028	31.846	46.139	-121.48	-10.509	10.1	90.643	-26.338	53.72	6.48	-141.245	120.434	4.422	-9.754	5.629
202	297.115	118.623	113.21	45.597	-109.157	-72.022	12.716	127.786	-86.291	19.939	24.472	-97.438	47.31	4.452	8.053	39.607
202.133	215.463	139.227	101.673	119.637	-71.786	118.519	19.104	76.427	-86.511	53.032	19.585	-82.899	63.544	-13.497	2.039	61.392
202.267	190.06	87.494	-23.065	79.932	-24.672	87.187	-8.435	100.587	-85.531	30.617	4.33	-56.689	-66.007	4.88	-10.16	82.794
202.4	133.809	46.798	36.943	32.573	-30.626	96.138	-8.453	117.152	-70.682	53.171	4.382	-22.331	77.79	-9.088	-20.268	158.291
202.533	67.85	100.652	-34.64	93.318	-16.627	43.233	69.505	114.923	-71.95	39.133	97.702	-11.267	7.891	-15.593	-3.009	164.69
202.667	5.469	253.401	25.865	146.139	17.541	12.21	33.438	129.3	-125.231	73.593	-48.487	-41.704	58.608	9.595	5.193	96.098
202.8	-107.406	-59.7	-84.243	-11.829	20.864	37.68	44.907	197.229	131.237	8.036	-1.08	-96.356	162.934	9.211	-14.775	112.19
202.933	-201.636	105.391	-4.317	50.417	-2.186	40.207	40.49	151.128	-153.669	25.724	10.607	-57.532	75.654	-4.662	-6.262	69.802
203.067	-148.49	81.73	28.732	73.448	5.6	18.706	13.975	136.194	-35.537	64.15	-5.233	-13.094	33.88	-0.391	14.877	32.511
203.2	-128.877	76.573	-22.377	50.621	6.956	57.576	31.021	146.005	-50.229	51.648	19.547	40.618	-47.288	11.597	29.689	69.749
203.333	-331.665	65.671	-3.105	43.401	-28.558	15.919	39.997	134.818	-47.246	73.942	-2.914	211.982	98.359	-17.151	-9.883	49.901
203.467	-267.437	77.23	-123.75	94.937	8.248	17.685	23.203	171.217	-22.959	57.639	3.639	199.719	13.471	14.894	7.971	37.829
203.6	-285.051	111.167	198.726	45.376	10.529	22.276	0.944	144.225	-49.302	27.258	9.5	178.965	-57.477	2.281	-7.038	86.998
203.733	-283.783	76.062	124.47	15.531	15.403	13.482	23.572	118.662	-17.658	92.568	2.522	129.617	138.431	-31.465	113.472	92.141
203.867	-91.32	133.164	237.241	44.143	9.206	45.701	9.888	112.598	-30.164	47.225	-0.976	100.095	-43.18	-0.475	2.246	91.502
204	-127.726	127.633	310.473	145.981	-1.148	2.367	-20.345	126.56	-121.085	61.554	20.219	59.99	105.574	5.424	7.457	103.17
204.133	65.114	78.295	-145.822	-32.646	19.876	176.273	6.426	160.088	82.449	81.485	2.958	68.507	24.075	-4.672	15.078	-49.581
204.267	-13.602	52.564	39.456	73.083	-33.913	85.29	37.356	106.534	-18.668	110.458	6.374	52.204	100.456	6.987	18.596	123.929
204.4	172.304	144.923	75.777	79.719	-30.788	59.039	-29.72	122.79	6.112	52.601	-11.264	138.778	88.858	-14.201	-0.935	93.705
204.533	307.868	113.748	-52.449	77.205	-4.626	35.364	60.346	72.546	-39.909	57.457	-5.288	141.501	54.287	14.019	-6.532	66.303
204.667	264.551	87.856	-5.615	54.78	60.099	25.142	-12.897	140.422	-31.061	25.13	-2.596	94.285	57.795	0.921	21.675	66.62
204.8	211.407	99.486	81.089	95.83	71.945	31.65	18.11	107.189	-4.073	89.336	6.22	130.522	87.421	-17.035	6.968	209.969
204.933	147.145	76.698	143.146	95.293	15.762	13.861	-15.091	82.163	-22.162	50.842	-0.499	101.918	52.558	-0.836	-85.211	92.335
205.067	146.919	110.74	36.866	53.439	-10.875	4.259	33.258	102.392	-6.453	35.205	-5.738	173.968	42.924	7.156	-2.561	190.075
205.2	162.859	84.191	47.454	95.05	-11.669	21.426	17.058	148.443	-22.071	81.819	0.763	167.1	-26.084	23.831	-0.448	99.524
205.333	249.403	84.934	155.41	-27.49	27.727	-14.537	33.571	-6.78	32.734	38.81	16.24	9.082	26.967	11.462	-21.182	168.993
205.467	50.76	105.672	-134.887	151.277	37.172	14.263	46.138	190.298	-36.38	58.822	5.747	200.335	30.454	52.212	-2.792	57.913
205.6	239.668	125.724	-46.788	35.698	85.082	32.671	43.425	195.045	-0.938	80.13	13.109	161.28	11.935	30.309	3.676	97.737
205.733	183.955	132.607	-58.852	30.501	242.458	57.11	71.648	158.451	-19.346	107.099	2.293	101.122	105.108	-20.783	114.164	81.624
205.867	79.07	80.677	-236.885	24.377	111.544	62.178	21.042	107.858	-16.171	114.083	-1.982	106.857	-11.424	6.258	-13.066	23.965
206	100.345	115.578	-221.941	-31.033	67.501	71.1	43.937	124.85	-9.472	53.012	17.801	140.811	38.993	16.003	11.208	175.745
206.133	-86.626	90.711	-243.726	-56.525	45.143	42.008	1.663	132.231	8.131	88.399	4.746	51.372	30.354	-5.617	50.771	16.491
206.267	-202.689	1.887	-205.488	-41.703	-73.268	45.9	16.648	90.238	22.304	57.558	-1.46	36.872	85.493	7.963	7.26	113.063
206.4	-204.733	135.605	-301.004	-119.316	120.516	12.373	-14.047	99.623	0.525	31.069	-7.987	27.413	-7.306	-7.421	43.641	139.877
206.533	-182.056	270.627	-245.473	-22.609	21.471	-7.959	-19.176	122.187	12.183	62.525	7.508	47.346	35.153	-89.615	9.446	140.446
206.667	-377.69	37.945	-198.263	9.735	-154.318	-12.289	43.49	96.417	24.529	72.708	15.596	85.761	5.585	-131.788	3.661	135.393
206.8	-362.635	19.169	-118.418	-20.405	315.215	30.581	15.965	145.534	-29.215	59.798	23.969	112.212	35.564	-105.581	-22.466	111.6
206.933	-444.02	-6.105	-135.52	109.997	54.64	61.234	18.172	123.808	28.804	25.712	-0.427	189.703	-22.284	-81.899	0.714	120.165
207.067	-441.724	-5.266	-99.842	63.745	80.213	37.412	-15.955	81.851	-14.77	68.386	0.408	51.418	45.569	-85.079	10.012	61.453
207.2	-411.552	-61.347	-114.811	82.87	188.42	78.864	20.661	154.906	-3.41	52.047	-4.311	64.64	62.682	-36.84	-23.846	222.753
207.333	-251.681	68.845	-92.664	155.393	58.498	64.693	-13.491	78.681	29.272	56.321	7.737	41.861	47.183	54.251	8.241	74.314
207.467	-226.772	116.186	-124.167	55.825	-3.217	14.335	11.128	82.04	3.9	74.71	-1.754	-7.349	61.2	10.014	-3.5	142.385
207.6	-286.045	140.608	-150.925	24.985	26.067	16.041	-5.97	133.914	-9.4	57.133	0	30.787	30.69	-20.507	3.361	142.528
207.733	-350.901	109.107	-118.995	47.068	52.287	33.366	2.189	62.191	-10.08	68.601	-7.402	-10.768	68.675	-117.199	20.552	148.75
207.867	-381.203	106.844	-98.353	54.194	30.033	12.223	-3.709	78.373	6.376	18.994	6.938	7.43	71.565	1.38	-8.804	136.505
208	-130.227	67.415	-63.871	-6.427	-16.278	-13.193	-14.898	21.319	22.533	60.522	-1.803	-45.619	97.637	-62.435	-20.712	87.324
208.133	-174.721	109.556	3.333	30.343	220.633	51.481	-10.997	283.645	21.233	99.392	5.248	-2.311	39.482	-60.86	-10.908	66.914
208.267	-78.89	71.798	4.26	56.2	71.617	19.723	-13.698	85.909	13.311	93.802	-4.398	3.434	35.256	-84.589	24.848	54.136
208.4	42.321	143.809	-3.479	115.845	54.615	19.481	1.634	102.032	19.705	69.823	1.588	-18.49	54.908	-87.969	-1.552	63.075
208.533	84.462	221.754	89.674	74.672	58.288	25.417	-10.178	168.627	2.751	79.682	3.132	8.56	16.844	-116.62	-13.91	31.011
208.667	147.59	82.188	61.47	60.793	35.487	38.719	11.424	138.221	3.313	73.438	3.536	-14.206	10.954	-90.647	5.438	32.031
208.8	109.559	86.994	69.102	65.086	46.128	74.649	-9.895	122.378	3.007	137.57	-4.836	-8.375	22.571	-76.317	9.323	-43.708
208.933	126.303	-37.882	61.688	87.241	-0.645	104.366	28.726	178.665	2.712	-28.592	-0.148	-173.871	88.157	-70.547	-0.447	-8.46
209.067	131.563	-379.668	80.142	79.108	202.348	55.762	32.9	111.319	12.161	58.653	0.22	-103.208	72.899	-36.862	7.902	2.689
209.2	250.757	-137.727	51.981	-38.585	66.571	51.983	17.972	68.456	-18.401	68.403	5.265	-137.106	37.73	-45.904	-2.434	-31.576
209.333	372.694	-30.601	64.997	101.324	-13.376	50.272	38.721	154.373	8.343	130.155	-125.814	-164.642	74.94	-48.91	-42.723	-145.777
209.467	65.309	56.777	-63.005	182.415	68.631	57.59	43.471	100.515	124.541	24.9	120.319	-156.547	83.448	-112.715	-27.408	-174.051
209.6	261.37	53.398	261.635	59.753	-18.881	14.351	7.963	121.195	-60.116	86.904	-1.494	-6.569	26.64	-60.772	-164.367	-262.222
209.733	263.277	289.223	89.363	38.496	-0.172	26.522	5.483	120.978	19.86	67.358	17.715	-206.303	59.908	-74.565	-51.958	-214.171
209.867	235.065	77.624	38.066	91.789	57.687	21.315	35.807	109.008	109.459	109.287	2.287	-174.62	74.482	-61.998	-33.672	-180.557
210	293.042	36.725	53.227	25.324	-108.044	38.108	39.789	106.929	25.187	57.353	5.64	-243.389	-74.923	-127.213	-35.66	-260.593
210.133	314.492	-101.872	7.987	54.026	86.472	14.337	21.615	148.195	-3.758	70.311	-13.696	-194.763	37.617	-62.851	-35.81	-254.662
210.267	300.164	-85.107	52.181	62.761	75.217	6.926	26.906	51.186	-3.394	54.141	-13.256	-146.378	229.499	46.63	-38.331	-302.102
210.4	286.911	-160.939	-17.737	3.323	72.256	10.771	42.866	96.024	-5.535	79.085	11.221	-55.994	50.742	-28.673	-50.618	-287.58
210.533	211.399	-128.457	49.806	142.664	38.781	1.952	26.354	117.126	-7.936	87.447	-6.229	-27.346	63.036	-221.948	-48.041	-46.684
210.667	390.927	129.281	155.307	149.513	182.552	-30.217	19.226	131.102	-85.227	46.72	-3.217	-137.579	93.23	-77.548	-11.742	-81.163
210.8	286.491	-154.759	-148.9	58.234	2.306	-29.824	45.052	153.307	13.799	84.147	-3.245	-123.477	51.57	-73.273	-18.367	-123.908
210.933	309.351	64.77	55.83	67.879	12.017	7.804	47.977	147.066	-3.347	47.463	-6.799	-31.128	22.89	-65.114	-15.541	-212.815
211.067	279.4	119.801	-20.198	18.613	-87.885	15.095	26.734	101.489	-2.766	212.366	1.637	18.751	22.781	117.426	-40.568	-283.761
211.2	233.175	254.604	-6.411	0.674	24.111	58.471	51.238	85.466	3.787	93.341	18.806	-42.097	-22.328	-111.63	-49.114	-296.454
211.333	190.617	149.024	4.492	43.652	63.783	60.652	39.108	118.925	101.909	73.313	6.595	-68.858	20.825	80.619	-28.453	-247.592
211.467	258.467	89.808	-155.678	-28.867	42.851	60.403	48.059	122.016	-20.336	163.708	-0.301	-37.667	-3.992	-111.971	-3.333	-208.417
211.6	234.601	142.705	137.254	58.315	77.357	109.334	25.611	134.272	-40.637	98.354	-1.08	76.603	2.366	-6.083	6.756	-256.536
211.733	261.359	106.753	57.727	-20.68	89.069	45.343	46.722	133.343	113.516	131.433	4.61	197.015	10.164	22.59	3.371	-216.892
211.867	256.774	108.357	41.086	17.21	73.693	105.748	-10.134	98.314	34.888	79.493	4.835	272.441	-12.727	40.711	-15.323	-307.684
212	256.358	143.608	157.504	19.758	26.074	9	-5.791	98.256	24.336	95.481	-13.034	34.05	-15.804	49.19	12.366	-215.192
212.133	321.009	104.7	30.287	18.446	26.742	97.617	-3.456	90.438	25.938	49.055	-20.831	163.594	-11.209	59.629	1.798	-168.424
212.267	303.027	93.165	68.515	12.281	83.299	44.199	20.311	164.265	2.726	110.319	11.668	209.006	53.057	74.266	23.985	-200.015
212.4	167.524	94.558	76.436	-8.34	45.258	78.353	12.831	132.432	11.814	110.201	1.011	135.426	-59.887	71.832	-21.198	-287.749
212.533	234.607	78.798	55.076	2.927	15.81	89.054	17.905	47.366	18.709	103.813	-5.102	105.864	54.038	24.854	10.198	-339.361
212.667	259.162	64.977	35.288	37.607	-1.178	100.721	45.615	101.802	0.555	62.549	2.677	191.67	100.237	65.113	-7.225	-354.934
212.8	158.998	124.503	39.54	-2.924	17.967	135.296	82.099	58.078	-11.363	116.887	0.803	61.073	58.225	23.668	-14.555	-348.571
212.933	236.986	77.404	33.524	-2.333	-45.128	52.16	53.485	153.708	-65.194	113.648	-2.128	41.453	9.93	50.979	18.499	-359.917
213.067	240.096	72.539	27.701	9.909	-5.614	-12.069	55.62	76.002	-21.472	53.736	-0.774	24.693	-10.822	15.27	-16.085	-262.168
213.2	238.242	46.911	3.211	-3.693	-91.063	120.343	50.388	80.946	5.8	88.212	20.375	-8.371	3.319	37.45	30.852	-260.465
213.333	277.642	86.276	-3.011	24.401	-299.205	-125.8	32.738	130.595	6.992	82.671	-18.463	16.987	-22.278	107.742	7.512	-234.762
213.467	296.395	53.133	4.696	27.365	-137.966	338.466	26.32	99.863	6.077	94.171	19.782	-10.645	14.1	95.723	34.703	-199.777
213.6	236.338	41.974	-5.502	55.994	-165.497	48.785	6.807	143.688	-6.455	25.029	1.828	-13.356	-29.136	161.376	-11.152	-199.147
213.733	318.963	95.467	-5.074	36.856	-158.438	59.627	9.56	106.163	-2.355	12.985	1.551	16.094	-28.652	38.815	-12.908	-70.567
213.867	260.595	105.838	37.22	13.468	-127.871	-34.035	57.744	123.288	-4.128	14.969	-0.787	-5.882	-6.94	26.726	0.317	47.44
214	316.938	65.82	-8.788	3.539	-97.876	178.582	29.44	91.629	0.963	76.137	-23.747	9.723	-8.331	-23.742	23.908	130.921
214.133	213.713	57.386	8.811	20.515	-72.952	53.059	65.334	67.948	14.188	111.357	12.589	-41.666	-43.809	-11.023	-4.737	164.656
214.267	177.359	88.358	3.187	-23.06	-27.939	44.654	56.74	43.862	-20.127	113.451	3.585	-15.525	-1.834	-17.733	2.525	154.404
214.4	187.087	58.772	-11.251	-21.762	24.793	24.638	35.859	102.349	19.494	75.446	-18.521	-89.087	-0.962	11.672	-32.412	166.365
214.533	210.121	47.371	19.825	47.192	11.632	34.037	42.063	112.411	-1.211	28.192	1.628	-182.927	-0.931	12.403	-0.686	165.912
214.667	189.443	47.207	7.227	12.956	150.634	-125.449	13.794	8.278	40.537	68.016	7.3	-229.178	4.505	13.051	22.567	148.444
214.8	106.06	31.22	30.313	20.605	72.853	41.314	68.413	196.137	-41.401	51.449	14.392	-197.186	-116.729	-16.644	53.674	119.612
214.933	271.823	22.552	-28.164	46.128	88.389	15.32	42.876	-30.653	0.557	-5.056	1.991	-195.026	127.14	-14.15	59.607	70.008
215.067	232.249	-1.941	-27.317	88.365	106.095	-12.604	53.243	110.345	-2.186	188.868	-18.183	-189.977	-38.888	-32.664	35.126	77.277
215.2	247.414	-1.712	80.018	55.248	120.583	26.765	94.301	96.678	8.92	-39.589	27.673	-181.352	21.033	-21.575	56.384	68.207
215.333	266.337	0.851	-19.889	50.96	83.18	159.258	36.882	220.529	13.178	72.083	-18.369	-182.459	24.457	102.537	11.723	100.906
215.467	232.946	75.94	-24.494	76.471	121.454	-70.813	28.679	149.203	-16.42	71.36	-16.403	-144.467	-2.661	7.378	23.346	165.421
215.6	269.064	-61.834	6.728	69.166	153.107	37.705	10.379	112.14	22.597	68.866	17.051	-181.183	-5.805	13.85	42.361	154.975
215.733	235.841	-23.355	-30.484	71.896	109.993	-12.739	35.573	133.943	-5.856	60.125	-1.373	-73.715	-18.878	33.242	22.56	76.792
215.867	219.211	-9.903	37.395	68.883	126.174	-13.293	-3.369	92.949	-3.159	70.084	-17.928	-114.944	-15.534	12.974	-8.199	173.344
216	516.791	-30.101	-67.854	145.686	114.749	-2.887	11.681	2.904	41.377	84.802	27.639	-74.894	-2.377	-27.842	17.583	184.399
216.133	64.146	26.682	70.193	-133.102	131.581	83.192	48.852	211.246	-38.403	127.046	-15.301	-43.65	36.9	17.274	-1.217	94.995
216.267	252.096	-13.464	-2.888	1.27	48.492	29.79	94.592	172.352	6.333	82.219	-2.999	12.937	-9.923	6.148	-8.447	118.138
216.4	247.919	24.043	-46.282	-12.367	46.301	44.167	57.843	143.045	-2.499	67.252	0.773	42.12	-5.708	19.548	16.738	122.257
216.533	351.851	-22.231	14.717	15.916	148.155	129.774	20.452	100.71	6.822	85.975	16.766	59.284	-44.041	76.09	-28.747	212.678
216.667	129.466	-1.16	-19.712	31.485	46.974	162.112	26.214	146.818	83.799	58.57	-15.702	141.938	-3.501	91.576	17.271	70.728
216.8	249.462	-19.9	-69.801	15.208	17.577	125.848	52.115	89.194	-104.159	99.636	-13.687	117.399	76.764	160.501	-42.456	121.942
216.933	187.94	-55.025	-56.537	17.001	35.564	38.526	19.713	157.317	12.75	58.702	18.132	75.643	17.036	98.989	0.54	123.492
217.067	216.656	-200.487	-53.294	-3.282	50.69	-35.916	20.123	113.655	3.662	75.075	-1.856	120.788	-42.219	88.271	7.206	118.552
217.2	177.611	16.271	-29.008	-4.329	77.889	10.036	23.604	80.14	1.264	84.595	3.842	138.844	141.561	34.568	-2.075	115.826
217.333	171.02	22.073	-7.985	15.369	-33.506	145.977	24.132	-0.652	16.25	115.397	-24.437	111.027	153.913	245.36	-13.144	121.589
217.467	148.488	44.101	-29.264	8.704	112.538	-56.946	14.571	213.468	-22.177	63.602	-2.912	46.001	91.493	-238.186	47.44	131.539
217.6	120.678	-38.33	-119.608	-15.495	35.003	29.773	24.881	107.128	-4.782	9.721	5.582	7.185	122.345	9.31	7.1	138.171
217.733	135.014	-27.058	-143.388	15.511	43.155	201.192	-4.796	172.377	0.082	115.431	9.888	68.323	150.808	39.064	-17.959	112.36
217.867	-12.893	-20.213	-154.57	-24.357	58.127	33.166	34.589	61.378	6.895	35.246	3.096	112.875	80.59	10.593	73.771	60.57
218	61.298	-33.23	-187.945	10.742	81.394	94.128	61.032	101.517	-6.77	67.364	-2.713	124.022	58.392	-39.674	17.587	110.609
218.133	102.224	-5.45	-134.235	-16.48	17.845	62.59	27.713	99.007	83.632	74.797	-21.534	80.664	43.717	-6.258	21.785	178.019
218.267	63.077	15.046	-108.846	-11.24	-4.567	62.671	36.422	99.767	-2.414	102.489	0.796	68.647	55.407	-33.695	24.455	153.779
218.4	30.273	140.464	-57.677	14.165	5.282	37.967	47.939	98.345	-100.034	120.694	1.427	117.774	29.358	18.668	3.94	198.236
218.533	70.265	141.232	-20.54	-11.372	8.402	57.225	8.769	132.921	3.059	125.832	1.081	61.606	37.199	31.395	42.923	192.068
218.667	201.251	125.897	-8.399	10.721	34.641	13.896	22.528	-5.507	-2.183	120.64	-7.244	38.344	10.698	-12.932	55.081	219.071
218.8	106.302	80.042	-12.527	12.45	8.789	46.289	45.672	276.354	22.94	48.23	-0.484	51.507	-19.69	32.632	-9.34	96.05
218.933	171.396	35.819	16.085	14.413	2.655	19.489	22.986	93.184	-2.183	84.996	0.875	67.344	2.344	130.965	5.45	221.608
219.067	106.766	46.574	56.873	44.192	40.987	32.493	9.035	133.414	-8.815	87.582	0.895	110.674	-102.975	68.104	-7.535	92.624
219.2	185.254	97.068	47.038	13.137	68.624	-12.433	5.785	129.85	11.207	94.61	-1.496	26.444	17.558	139.645	16.857	199.337
219.333	207.592	117.534	96.307	26.332	14.852	-5.599	-7.886	90.573	8.919	118.667	-61.872	25.367	33.193	99.722	9.583	115.036
219.467	226.388	68.422	64.967	-25.217	3.047	-23.796	20.297	94.406	-11.329	93.361	-34.583	84.198	228.274	79.186	15.024	97.018
219.6	236.113	41.81	83.021	-9.493	27.592	-9.438	12.454	99.335	-5.028	107.516	-107.732	86.143	140.112	10.878	16.188	119.483
219.733	134.042	20.482	140.64	14.196	30.035	-11.442	-2.944	115.865	3.951	112.165	-113.712	78.799	113.497	12.412	19.098	113.45
219.867	143.404	34.275	15.444	26.039	48.807	-20.775	31.759	29.844	2.299	55.989	-79.547	125.434	99.874	5.572	28.211	27.616
220	124.072	125.761	27.467	146.835	52.255	-120.598	-18.526	-127.494	19.46	228.008	-67.394	137.229	52.614	-7.98	5.438	20.91
220.133	150.434	39.111	54.721	37.634	25.284	97.861	6.945	171.405	4.787	115.251	-19.101	178.077	56.516	-2.049	-5.996	11.493
220.267	152.701	83.769	10.39	83.202	34.305	-9.964	8.298	12.53	16.354	98.806	-20.057	198.872	81.663	9.371	11.973	-9.586
220.4	63.232	50.616	93.248	64.987	86.875	-5.551	-10.581	1.151	-2.418	66.703	-34.811	91	119.256	-1.809	-18.472	-35.133
220.533	266.955	52.933	39.128	68.376	40.001	-7.462	-3.015	-12.195	6.554	65.99	-29.635	70.226	76.671	10.947	4.276	-16.121
220.667	101.157	13.843	49.029	101.992	30.19	12.625	22.696	11.992	1.869	56.454	-32.346	30.705	75.011	3.423	-4.774	62.684
220.8	126.766	6.553	31.775	41.002	11.223	-3.557	7.51	-7.406	-4.419	87.675	-12.674	26.249	56.304	-5.891	16.666	29.324
220.933	58.963	25.117	76.024	102.882	-37.064	92.547	-18.202	66.591	0.123	47.297	0.746	2.236	33.357	3.22	7.531	21.084
221.067	194.45	48.041	71.707	83.273	37.723	-24.756	-11.284	54.818	1.936	38.904	-4.386	35.668	67.415	-4.98	6.857	31.606
221.2	263.16	83.43	18.639	37.94	-10.44	138.919	-15.033	32.455	3.575	-46.176	-8.029	-16.196	80.38	17.743	-6.272	-3.031
221.333	226.293	83.885	151.348	44.574	70.863	-28.956	-3.537	-2.047	3.814	53.823	-26.651	23.605	-7.919	125.737	-0.702	-62.887
221.467	229.139	127.637	51.161	58.626	55.595	-9.249	5.54	67.188	3.223	38.18	-19.392	-36.039	91.311	-129.484	23.287	-90.087
221.6	244.692	91.338	73.65	66.743	19.014	22.8	-7.243	95.632	-5.414	106.441	-33.819	-17.064	67.453	20.33	4.515	-197.107
221.733	234.86	75.933	3.997	90.598	98.135	-36.322	6.683	41.274	0.701	218.266	-8.815	30.242	25.005	-7.955	10.412	-235.421
221.867	337.491	111.825	31.37	62.543	38.469	14.175	-19.39	101.039	0.462	129.957	-12.464	45.782	44.813	3.516	4.6	-234.447
222	233.195	68.954	15.719	73.413	125.914	18.441	3.645	84.881	-8.852	78.646	1.018	14.209	15.042	2.378	-2.499	-271.123
222.133	237.093	88.145	49.17	3.44	-55.539	-21.924	4.681	93.271	5.421	86.646	-0.657	5.77	12.08	51.226	2.572	-296.301
222.267	246.28	63.86	144.011	70.468	27.342	10.856	-5.686	74.196	95.733	125.541	-2.528	-30.936	23.477	17.924	-9.702	-269.602
222.4	283.229	104.068	54.476	17.163	5.041	11.645	5.466	102.832	1.542	126.948	-1.569	-6.858	1.727	30.497	-7.091	-240.11
222.533	259.553	74.611	72.299	66.011	-37.485	72.182	-10.849	128.353	-10.792	-14.962	-10.914	24.076	-4.412	35.687	-7.831	-21.653
222.667	257.577	58.437	153.657	145.126	3.318	33.887	-30.804	-11.373	12.411	238.036	-22.028	32.719	-19.287	130.86	-1.613	-8.541
222.8	45.255	-83.499	-54.758	-61.6	-18.209	45.49	-5.99	102.749	-100.049	-11.239	19.237	32.8	17.895	-88.97	4.851	-156.091
222.933	305.536	163.586	76.313	-70.208	-31.319	28.575	28.846	23.846	22.335	145.63	-31.558	10.084	-9.741	-7.456	13.145	-112.452
223.067	179.712	-93.555	-19.067	148.236	23.913	111.062	16.097	161.176	24.297	142.376	4.584	-1.184	1.862	1.001	-5.294	-229.656
223.2	192.656	63.355	-4.933	-4.081	96.025	44.509	9.812	105.1	-5.825	60.105	-21.108	25.978	-0.915	-6.252	-2.886	-153.924
223.333	221.523	68.4	39.776	21.864	-5.158	121.42	-30.239	42.957	1.253	96.42	5.047	42.901	17.64	-0.919	-4.111	-169.86
223.467	207.711	92.719	48.881	4.651	-4.911	54.326	-156.674	145.983	2.817	56.863	-12.257	36.593	16.608	4.022	5.642	-54.266
223.6	220.434	148.909	-5.554	-20.665	10.463	55.284	-158.064	270.096	-13.837	46.443	3.069	47.26	-4.074	3.365	20.671	-124.78
223.733	167.779	90.964	8.966	30.174	-132.061	20.386	-190.824	46.212	-8.59	46.569	-3.501	60.636	-10.24	-6.667	-12.096	-133.458
223.867	33.722	73.005	78.374	-35.285	-283.296	39.737	-127.219	194.046	-26.221	20.654	-0.162	49.886	31.084	27.814	-7.887	-14.803
224	206.628	105.445	180.7	145.135	-233.445	59.602	-165.003	146.746	1.885	71.756	5.632	60.695	-11.912	248.824	-5.889	9.774
224.133	255.003	101.148	-95.683	-118.258	-176.07	13.646	-90.473	112.485	68.755	72.629	-1.911	87.948	-24.482	-84.659	16.038	-12.43
224.267	257.741	103.07	126.542	1.329	-148.513	157.359	-29.442	104.1	47.045	9.456	3.202	79.897	12.731	42.559	-14.333	-8.598
224.4	269.017	93.261	26.843	30.728	-141.005	-102.94	-28.707	130.793	15.394	32.365	3.386	60.447	2.596	80.425	-100.593	45.461
224.533	265.502	228.104	94.451	-42.715	-158.751	24.809	-10.23	117.813	1.382	20.957	12.761	92.375	-8.765	38.592	-108.232	102.228
224.667	267.492	85.603	33.646	-21.886	-162.776	64.493	-10.821	-24.174	-20.778	15.721	4.411	34.385	-10.15	48.391	-122.964	209.994
224.8	277.175	84.406	45.654	5.447	-176.915	16.392	-7.684	155.73	12.674	-3.581	9.68	18.399	7.3	28.354	-185.411	253.769
224.933	265.9	34.82	16.191	28.478	-172.657	36.422	-21.77	131.322	-3.943	-6.729	4.973	43.448	-11.525	30.611	-95.28	320.15
225.067	249.491	70.03	6.467	-116.291	-130.529	202.188	23.036	101.986	13.865	13.731	1.803	51.452	36.077	24.615	-129.407	243.768
225.2	237.17	176.723	-12.203	91.008	-161.314	28.005	20.477	40.277	8.081	-6.873	-3.547	40.352	-17.061	-10.766	-83.001	229.416
225.333	-64.981	61.506	83.794	-14.458	-160.656	-12.414	-24.193	156.78	-6.129	-6.241	-7.443	-10.77	-9.416	2.561	-122.871	246.999
225.467	-136.745	57.142	86.948	-38.842	-134.432	-77.224	41.524	144.302	8.145	12.458	7.923	65.176	12.04	40.389	52.197	85.601
225.6	55.79	-27.975	-29.067	28.951	-128.431	32.415	6.136	120.999	2.863	11.485	6.084	13.526	10.218	16.578	3.34	97.543
225.733	97.545	6.917	7.119	5.557	-102.881	29.259	34.119	298.538	-12.613	-3.979	1.904	-3.39	-4.72	12.177	2.677	49.276
225.867	79.63	9.266	24.826	33.513	-83.704	98.173	37.869	201.856	14.496	-9.429	2.802	44.002	-5.875	11.932	-8.778	89.035
226	116.779	-12.035	-26.459	-15.95	-53.898	60.728	4.132	130.009	-0.097	-7.55	-0.117	59.907	4.17	-5.337	0.731	168.361
226.133	282.527	14.877	-18.394	187.277	-115.465	57.864	56.441	119.103	-15.514	-32.667	-8.503	44.212	-9.164	-5.646	-9.977	202.363
226.267	349.175	-7.373	91.295	71.627	-91.105	32.292	19.666	130.578	0	-4.003	-2.067	26.829	-18.861	-15.34	3.337	153.955
226.4	377.776	-54.82	-45.219	118.374	-118.49	51.479	12.465	71.306	20.924	-8.41	-0.987	-8.654	18.376	110.126	-1.874	169.208
226.533	162.943	-29.924	12.301	-10.754	-159.325	165.682	12.871	92.048	3.226	3.729	11.973	48.475	-3.598	-128.475	5.789	196.047
226.667	242.206	5.25	152.074	35.144	-147.916	-123.251	23.929	127.358	-12.656	10.775	5.417	88.767	16.549	21.603	-11.795	181.321
226.8	210.65	-32.052	-116.448	-42.334	-105.44	177.691	17.04	181.32	-8.699	-125.691	-6.929	50.969	6.582	58.742	15.047	109.095
226.933	216.012	17.628	51.719	7.636	36.325	-109.463	4.59	126.805	16.831	-246.182	-0.403	62.16	-2.926	-16.538	-2.829	126.366
227.067	16.607	69.13	-48.766	-10.026	-39.193	149.683	-14.743	118.24	10.763	-268.36	-5.115	98.315	33.039	-23.29	23.013	186.249
227.2	47.53	55.293	-129.407	54.368	-22.824	-8.965	10.577	88.446	-3.193	-192.588	-0.696	62.025	-12.949	-22.417	-3.067	120.378
227.333	100.027	119.746	35.538	-21.821	44.988	20.721	2.478	93.967	-2.351	-146.697	14.994	58.928	30.417	50.526	-39.553	125.9
227.467	205.102	168.505	14.977	32.466	-19.788	29.408	13.664	122.203	-0.885	-23.859	-1.671	150.599	2.617	7.292	-16.614	177.486
227.6	279.415	170.693	28.687	4.202	4.416	-69.588	8.119	51.898	1.89	-63.426	-16.235	85.331	-10.854	11.81	-31.187	-100.33
227.733	175.021	-18.603	71.136	-15.395	-25.214	108.912	-10.07	27.517	-2.683	-18.743	34.255	70.734	8.179	-20.962	-47.426	-143.013
227.867	141.844	-35.882	117.409	-118.044	18.709	2.786	-5.457	190.485	-8.48	4.932	-3.682	70.445	17.797	-30.218	-36.569	-44.817
228	107.424	25.661	165.061	-153.172	-13.705	27.071	35.132	67.438	7.239	74.626	2.46	63.136	16.583	127.283	0.494	-32.837
228.133	80.752	2.181	-245.298	20.491	39.654	30.816	38.792	27.402	1.631	89.388	-11.446	119.554	21.805	-107.505	-2.899	6.142
228.267	104.556	-2.878	110.452	83.678	25.057	12.455	72.428	122.998	-4.37	99.122	2.493	99.872	1.458	105.884	-17.032	50.512
228.4	113.582	-20.377	-140.818	19.285	23.843	-57.85	4.276	122.221	-0.605	66.914	3.16	108.569	3.535	-15.914	0.748	83.799
228.533	248.526	4.201	180.85	52.267	-4.724	189.905	34.355	145.701	-1.636	38.748	3.753	113.485	7.185	90.353	-47.807	76.803
228.667	236.74	-42.573	16.314	-9.397	114.982	-11.225	26.994	144.966	-16.78	10.711	9.794	51.173	31.498	104.844	-25.11	118.935
228.8	136.524	-168.763	65.875	-26.286	0.644	91.488	37.997	73.184	0.792	29.623	0.756	29.024	4.037	68.189	-33.511	83.969
228.933	410.961	-191.31	4.194	-2.367	218.974	126.992	56.198	110.85	-2.777	17.004	-4.772	67.011	8.251	47.934	-15.906	136.6
229.067	346.903	-260.773	35.57	-107.488	-17.977	-61.057	40.522	132.978	1.237	10.757	-10.115	136.283	27.401	4.945	-20.841	157.091
229.2	170.025	-252.671	35.879	-49.225	158.447	148.75	25.179	84.939	2.123	-9.131	16.985	30.822	-9.327	35.152	19.803	114.75
229.333	214.385	-148.76	163.276	-159.372	-6.246	5.457	16.804	81.902	7.907	33.635	-20.256	72.441	-124.593	125.858	-2.638	67.125
229.467	27.249	-214.114	-133.664	-157.155	94.876	93.906	25.602	88.714	-1.08	-86.721	-2.175	72.849	146.288	-190.086	-11.413	54.759
229.6	29.047	-63.042	-9.689	-169.503	17.733	35.766	7.149	88.646	-0.606	132.35	1.514	135.649	-4.901	-13.71	14.322	52.691
229.733	26.767	-203.107	-119.399	-169.957	-58.489	-17.837	93.073	147.275	0.632	-49.75	2.451	139.968	2.395	30.367	1.039	23.906
229.867	64.154	-209.115	124.918	-202.307	58.889	113.265	26.618	79.667	-4.256	55.615	9.021	96.838	7.224	-6.673	-21.593	77.815
230	-17.724	-100.042	-10.389	-137.058	119.088	17.755	14.823	81.601	-0.444	33.558	-1.384	79.414	-1.442	20.813	12.239	88.518
230.133	40.078	-92.172	13.837	-80.168	68.921	25.447	138.893	-6.558	-19.196	35.747	7.65	40.282	-6.171	28.373	-0.953	88.777
230.267	79.985	-103.089	-21.15	-35.073	65.75	15.498	-90.977	37.157	-1.144	3.855	-3.688	118.92	-6.036	13.876	4.585	44.63
230.4	57.716	-297.213	22.059	-40.379	103.774	-10.503	132.684	94.302	-6.815	109.48	-11.288	129.162	-2.194	29.994	48.702	81.023
230.533	56.854	79.359	5.239	-48.764	32.893	15.305	22.188	69.001	2.158	31.948	1.291	62.63	9.029	120.265	61.654	24.964
230.667	56.444	-77.226	159.751	18.979	27.274	-126.187	28.037	-127.56	9.351	-34.547	17.391	81.322	5.372	26.562	33.214	56.407
230.8	48.796	-63.606	-175.831	-29.319	29.21	23.084	34.878	279.878	-7.564	-296.848	9.996	75.951	10.165	-9.061	20.733	22.502
230.933	10.439	-210.9	-114.103	-33.348	-8.484	43.037	42.477	137.908	18.614	-564.091	-10.979	54.054	-9.132	-118.453	2.539	-28.139
231.067	42.43	263.195	126.162	-34.144	20.71	160.94	43.53	72.39	-20.11	-473.868	-3.944	94.351	-5.835	80.036	13.047	110.415
231.2	170.569	-20.426	-21.201	-19.543	-0.541	48.45	18.628	109.3	24.535	-376.588	2.196	76.262	3.374	51.552	15.13	81.551
231.333	132.144	45.995	-14.528	12.597	15.139	-66.539	5.105	146.02	-10.066	-294.873	0.748	131.73	-3.964	25.267	-7.931	105.244
231.467	320.823	151.317	-27.471	54.843	1.705	11.817	-113.171	72.387	2.636	-222.998	0	136.523	-0.54	10.57	16.079	77.654
231.6	348.799	83.681	-53.732	-5.726	23.284	11.731	131.385	198.697	2.974	-110.14	-3.695	125.976	2.172	22.089	-4.104	94.079
231.733	279.109	40.778	-71.285	12.523	32.213	2.147	21.505	144.445	-13.001	-76.056	4.015	127.613	-16.401	52.309	1.18	146.364
231.867	285.606	71.18	-35.268	28.705	44.325	-8.918	-51.457	122.218	-5.935	-100.791	-1.099	114.674	-1.813	86.633	-3.054	106.777
232	199.586	115.902	-77.563	30.667	149.761	-8.512	23.837	126.205	5.587	-49.208	4.099	127.83	-7.049	253.657	-18.572	31.459
232.133	78.996	32.759	-192.068	45.09	14.482	7.954	28.091	97.963	-1.12	-39.194	-0.276	116.719	34.974	-161.746	15.755	-7.591
232.267	168.192	24.282	-66.879	35.881	148.365	3.458	121.993	123.951	4.453	-27.821	-10.063	120.9	-51.376	55.339	14.434	6.967
232.4	118.441	-23.41	-117.577	-6.019	109.555	11.698	38.071	-14.641	-5.47	-9.018	-8.095	74.592	50.938	12.587	2.265	9.084
232.533	110.379	31.639	-135.467	-24.568	123.567	-3.905	34.181	144.789	8.523	-3.429	17.301	16.105	1.414	42.555	-5.386	-6.49
232.667	22.713	153.047	-157.287	26.134	84.426	-3.179	17.784	98.783	-17.028	2.436	5.74	49.879	-44.576	42.056	-2.517	3.915
232.8	-8.82	126.198	-119.789	-40.05	53.191	18.302	32.648	145.245	6.759	-22.719	-1.764	105.188	22.668	28.657	-2.471	-16.661
232.933	27.606	77.921	-50.17	-12.59	57.463	-22.243	16.633	243.869	-7.64	13.615	-14.704	71.529	39.144	-9.024	-1.523	-40.461
233.067	201.475	124.225	-159.757	3.588	15.905	103.334	34.368	129.846	6.348	2.553	-0.821	99.579	-9.77	-5.25	-0.907	32.322
233.2	183.92	156.554	-65.436	-6.097	64.151	-80.761	11.222	122.561	3.908	-13.64	-9.748	37.256	-4.597	23.23	-1.951	-57.992
233.333	128.065	189.745	163.964	142.068	47.735	-16.29	9.438	18.834	-7.422	-15.198	-2.015	94.649	10.12	129.169	-123.955	34.323
233.467	163.49	117.15	-263.41	-143.763	66.27	-1.823	-37.542	169.305	12.855	11.865	18.647	65.552	-10.659	-139.248	54.584	1.629
233.6	20.44	191.739	-76.429	-6.493	72.97	-7.099	52.64	131.772	-6.612	-12.378	21.115	79.895	14.135	14.194	-84.726	-18.853
233.733	32.336	200.639	-79.083	3.605	84.747	-2.399	18.784	121.898	1.778	4.232	-25.661	69.753	-17.597	14.294	-84.636	15.743
233.867	33.599	140.672	-61.359	-28.288	66.262	-1.418	46.97	99.905	1.693	-5.21	9.737	84.715	10.583	-24.389	-89.046	-90.1
234	244.498	147.043	-57.826	-6.823	35.363	1.073	13.357	95.482	6.554	-2.114	4.707	125.939	-7.869	20.779	-14.703	-96.997
234.133	99.559	139.516	-68.647	13.305	29.513	-32.709	-13.314	112.709	3.447	6.51	1.552	67.299	-18.198	-28.467	-5.362	-172.842
234.267	278.887	101.874	-68.771	-4.864	50.039	-79.48	144.5	94.037	6.314	-8.733	1.664	100.978	35.204	16.129	-22.949	-226.967
234.4	199.193	105.31	-85.324	-31.188	53.654	-136.496	-108.454	162.149	-15.392	-51.037	32.189	88.197	-155.214	-30.582	3.004	-239.114
234.533	163.051	114.951	-45.029	-13.054	10.75	-231.75	104.365	134.642	3.165	-134.976	12.565	121.244	165.761	-64.939	-6.065	-212.64
234.667	198.312	127.316	-13.351	140.567	149.389	-200.877	18.647	126.693	-7.578	-141.299	0.722	88.309	-18.191	8.69	-27.494	-216.461
234.8	195.985	211.287	62.444	-168.904	-79.796	-74.056	-63.402	82.948	19.237	-181.704	10.925	78.623	12.257	-263.724	-43.744	-244.002
234.933	202.681	139.274	-24.938	-36.338	55.538	-262.879	-1.14	122.276	0.759	-114.986	-0.784	114.154	-21.95	-75.689	-41.421	-217.248
235.067	64.783	201.195	28.068	-12.531	37.233	-126.526	53.517	112.562	-7.484	-273.349	7.706	103.909	8.938	43.923	1.588	-232.146
235.2	156.633	29.682	-72.029	6.882	94.361	-149.948	19.44	84.344	7.005	-91.864	-0.553	48.05	-8.003	-203.732	5.259	-313.033
235.333	149.671	287.067	83.115	11.592	60.326	-39.881	18.964	134.234	1.306	-155.092	21.578	87.566	-101.484	-183.685	-6.739	-316.312
235.467	167.095	103.166	135.503	-25.711	-21.173	-148.054	10.931	100.147	-1.362	-173.276	-24.297	107.46	129.268	-145.842	4.099	-355.124
235.6	317.51	139.975	140.532	-6.164	53.797	-136.696	43.503	90.243	-15.306	-176.483	-1.176	130.823	-97.282	-172.411	5.834	-321.564
235.733	370.824	146.047	71.034	-12.244	8.098	-270.571	1.528	96.318	-16.228	-201.675	5.011	114.275	104.917	-176.968	-3.392	-348.013
235.867	71.3	173.95	171.257	-41.479	-4.332	-97.645	40.025	148.232	16.139	-235.726	2.566	83.757	-30.046	-161.996	-11.511	-276.007
236	178.927	181.098	-33.741	-14.588	-16.876	-254.809	-11.251	96.932	-0.839	-163.586	-0.984	91.416	42.339	-13.534	-13.749	-312.688
236.133	202.804	112.429	71.892	-31.739	-15.884	99.302	-7.925	128.954	-2.982	-150.36	57.129	87.136	-10.891	-250.001	13.484	-295.341
236.267	157.133	100.385	19.756	-33.161	-134.109	-32.25	33.146	46.851	-4.507	-108.966	1.432	129.115	-9.222	-43.043	14.424	-103.314
236.4	142.99	93.319	8.967	16.938	-216.356	-11.052	0.906	133.285	11.754	-66.577	30.241	128.949	-6.723	-31.042	39.699	62.962
236.533	200.333	106.624	-77.74	-22.229	-260.128	22.442	64.487	149.514	-5.624	-41.292	17.453	185.801	12.989	-3.783	24.654	-15.954
236.667	202.474	65.609	88.514	7.701	-203.308	80.922	-106.879	128.697	6.53	11.289	4.062	152.124	-5.127	-62.609	-8.34	-137.672
236.8	179.118	114.071	-91.722	-32.927	-225.577	126.776	65.806	133.621	-8.919	108.76	28.481	91.396	8.272	-127.697	35.664	-275.763
236.933	172.802	63.512	13.837	-61.746	-174.172	76.432	20.358	174.453	25.998	13.811	13.485	99.769	-5.71	-141.465	-16.891	-284.89
237.067	189.847	66.353	13.186	-60.861	-225.12	90.773	42.129	158.251	-8.301	-39.06	31.743	117.264	-20.977	-141.118	-7.11	-265.84
237.2	177.294	95.284	-43.735	-35.214	-235.098	32.914	33.44	90.904	-16.515	2.369	-5.984	81.025	2.603	-141.647	-10.701	-256.192
237.333	125.865	111.073	-101.775	-37.081	-170.269	-15.815	-26.979	61.94	17.456	-6.649	17.713	55.269	-30.534	-122.635	-16.219	-205.861
237.467	142.274	142.652	41.364	20.515	-179.817	86.766	12.643	96.728	-13.785	27.849	-10.853	70.59	69.375	-198.33	18.481	-174.363
237.6	115.63	59.057	109.619	29.929	-132.364	48.65	35.344	109.493	-2.212	2.122	-15.369	95.278	-6.962	-136.123	0.988	-174.5
237.733	249.146	142.22	6.06	21.697	-177.626	101.472	-0.278	68.68	-7.766	-68.446	22.513	83.087	-66.48	-134.128	-9.341	-177.536
237.867	249.982	102.43	175.598	-12.724	-139.414	61.872	17.453	32.015	-2.234	82.968	7.546	30.115	-67.301	-58.828	37.398	-236.172
238	230.852	95.322	23.732	41.753	-7.48	30.879	28.451	104.984	-8.413	124.599	4.501	85.841	128.523	-88.245	12.664	-154.863
238.133	235.467	59.084	-149.361	55.064	-16.894	82.759	46.894	28.133	105.089	62.774	-5.42	123.254	6.466	-77.805	1.209	-153.046
238.267	182.74	60.946	128.171	27.309	-23.444	17.747	14.541	73.624	-117.904	111.698	1.533	51.105	-11.102	-76.77	11.161	-216.546
238.4	167.202	95.344	25.11	32.464	35.258	69.479	23.727	160.367	4.655	92.999	0.586	55.37	2.105	-31.405	6.801	-217.781
238.533	109.25	137.995	-158.084	-7.698	-16.41	39.499	-1.049	109.363	-1.885	83.168	11.454	66.518	10.45	-27.753	-2.546	-281.35
238.667	44.602	67.531	31.485	-18.21	-153.973	128.126	-16.276	108.688	34.637	139.012	39.351	43.23	-9.337	119.704	-6.677	-236.639
238.8	28.118	110.722	153.396	16.462	143.769	-38.198	-3.998	67.897	42.105	94.947	40.274	175.406	-2.622	-49.532	-1.376	-346.404
238.933	8.976	32.442	-163.289	61.514	20.931	64.826	-0.167	-16.863	-2.988	66.675	-1.838	143.323	-5.698	-111.812	-11.693	-292.446
239.067	-147.554	35.822	78.099	17.503	35.97	62.579	18.648	91.14	-6.728	52.235	-0.646	170.552	16.462	10.931	16.563	-220.671
239.2	-313.939	-24.178	-130.711	67.338	49.843	94.661	39.613	109.564	5.615	68.961	4.412	34.508	-27.924	152.053	25.77	-187.203
239.333	-282.848	32.744	-241.161	114.51	-7.008	90.681	29.975	91.324	15.052	71.904	-0.27	92.425	-8.461	40.081	10.844	-20.928
239.467	-348.297	38.795	51.004	70.185	55.374	71.139	53.877	159.172	-8.503	132.336	-2.708	126.718	13.73	18.447	-29.47	98.799
239.6	-390.604	38.284	-58.081	52.798	24.069	75.808	23.926	114.332	-1.029	126.893	16.066	102.273	0.479	174.75	29.468	203.785
239.733	-440.35	8.093	-96.439	-60.29	-3.059	103.19	38.958	116.352	-3.648	112.063	-4.319	5.475	6.999	46.745	15.635	343.341
239.867	-353.591	56.504	-130.742	180.353	-5.71	85.175	44.813	138.335	12.867	88.616	2.262	87.691	13.167	-73.89	57.676	284.933
240	-113.462	127.76	-156.005	140.072	-150.288	10.294	25.404	70.737	43.971	113.45	-122.841	75.267	23.37	32.238	34.941	240.419
240.133	-180.791	-101.063	-149.085	-78.041	201.852	138.804	26.674	137.098	100.213	133.523	110.729	54.384	-58.907	1.233	4.089	224.341
240.267	-195.589	188.428	-141.865	28.39	15.245	38.708	18.725	99.302	-15.245	156.464	-3.709	63.043	46.801	173.245	17.415	181.691
240.4	-239.394	76.364	-143.356	53.164	58.12	-4.393	14.472	258.844	-18.548	80.677	0.497	89.855	5.375	71.919	9.099	95.071
240.533	-56.412	147.766	-111.607	58.261	48.709	-13.046	18.023	139.247	-10.477	91.456	0.619	121.424	-9.46	97.703	13.048	72.82
240.667	92.915	-95.309	-91.816	40.769	27.309	11.137	-10.836	128.991	-86.562	131.916	-15.212	24.294	-22.865	91.545	24.596	84.387
240.8	166.715	48.552	21.087	41.475	22.062	-13.52	-5.562	80.661	219.489	102.306	-3.984	92.736	19.693	86.996	11.495	-10.253
240.933	216.458	178.194	-31.682	4.191	50.895	29.535	29.653	107.802	190.977	59.362	-2.373	52.6	3.373	25.489	2.58	107.837
241.067	319.734	51.69	23.262	12.887	52.855	-5.366	34.385	127.403	80.582	49.501	-5.752	83.093	-21.605	39.827	-3.525	203.892
241.2	235.151	71.248	-31.533	35.475	75.033	62.836	-22.542	103.329	61.943	15.083	7.775	88.103	9.57	56.646	13.281	-83.493
241.333	188.842	138.303	32.146	144.879	-51.737	123.472	19.94	65.477	20.866	26.51	-117.773	113.86	-8.672	23.651	24.517	-4.609
241.467	288.507	197.09	-60.151	-124.314	20.421	81.611	-5.938	192.401	114.182	42.015	91.238	48.344	19.743	33.776	8.171	54.628
241.6	205.066	98.195	-80.781	30.082	118.678	9.824	-2.072	112.187	8.016	14.794	0.778	49.625	37.365	18.496	-27.704	22.063
241.733	110.082	126.481	-100.46	18.302	-76.787	12.564	-24.303	82.553	49.846	11.623	-23.332	158.436	-5.353	37.518	10.106	11.247
241.867	222.341	104.585	-190.571	-7.666	108.679	-16.071	-12.795	127.369	11.601	35.219	-9.626	39.971	-3.685	17.42	40.466	-30.188
242	171.015	131.102	-325.762	-4.839	134.199	9.135	-2.721	87.483	-75.958	19.523	-10.384	25.453	-8.631	8.022	29.084	4.64
242.133	152.55	98.958	-185.539	17.158	7.067	-11.883	2.426	138.063	-127.445	-12.365	-19.073	-81.92	1.666	26.435	15.314	-41.069
242.267	128.622	88.843	-134.075	7.192	33.278	-12.622	-0.923	102.233	-166.108	26.174	-9.086	160.02	-15.919	6.489	-4.465	-61.808
242.4	107.09	155.589	-85.97	40.603	84.277	2.339	-3.783	167.676	-72.993	-20.749	-24.175	11.304	11.931	7.026	8.718	-130.952
242.533	156.705	54.808	-195.193	31.334	87.852	-108.476	-9.757	139.745	-48.104	7.679	-45.093	52.74	-19.26	6.1	10.717	-173.944
242.667	158.877	27.238	150.494	144.701	40.756	-125.118	7.303	111.459	-11.211	73.57	-32.151	62.761	-29.227	-4.98	5.432	-164.493
242.8	47.078	411.914	-120.688	-88.643	14.7	-233.374	13.895	108.944	-44.463	149.723	-36.061	57.056	-105.522	5.765	-3.818	-157.954
242.933	115.59	-68.7	-43.136	4.849	56.063	-230.037	3.792	104.471	-19.334	128.024	-37.909	71.139	-134.728	-33.217	17.019	-199.936
243.067	164.312	85.63	59.539	49.526	84.301	-248.095	9.163	146.304	-26.259	116.755	-36.831	48.944	-129.722	6.387	9.222	-258.877
243.2	28.925	76.39	7.768	-3.238	89.909	-205.332	-24.463	164.65	-13.776	67.349	-54.212	15.405	-84.796	2.048	-23.197	-267.173
243.333	66.601	206.825	12.169	16.862	54.365	-182.17	8.81	144.468	-27.486	53.924	-50.363	9.638	-23.475	2.404	-16.512	-290.453
243.467	-48.514	125.624	96.357	25.418	110.476	-228.607	-9.189	150.671	-26.828	44.791	-16.36	-8.742	-31.151	-21.384	1.492	-169.102
243.6	112.376	109.252	45.113	37.077	70.983	-165.264	17.977	131.226	-22.394	59.34	13.151	-8.174	22.059	-5.273	17.124	-223.084
243.733	123.679	131.502	107.704	-22.485	62.588	-94.639	-8.351	164.962	-30.198	14.129	-14.465	31.789	45.74	21.552	30.537	-294.493
243.867	84.135	99.053	93.532	56.576	55.996	57.903	26.371	67.844	-9.996	39.658	20.127	8.317	27.141	-45.58	-11.852	-148.67
244	82.913	-23.835	7.182	144.455	22.5	-28.852	-7.246	144.381	-47.513	11.906	25.651	-86.302	23.996	-13.296	22.093	-63.092
244.133	95	216.629	91.33	-114.694	33.309	118.34	3.575	108.866	-44.269	12.199	23.978	9.723	27.405	9.396	15.283	16.659
244.267	103.122	94.375	90.998	-16.826	11.51	110.448	-0.653	99.539	-88.677	22.782	-10.799	101.453	22.37	24.934	-9.39	-63.973
244.4	243.4	-111.543	-40.151	-7.773	43.036	68.553	-8.594	92.739	-35.039	14.537	-10.026	-26.841	15.164	-4.689	3.301	35.893
244.533	187.745	395.985	68.352	56.26	31.786	21.303	35.531	163.361	28.158	13.384	-22.128	-48.718	2.034	-30.61	8.831	83.736
244.667	106.649	18.637	42.837	-7.378	104.938	37.075	-22.3	116.969	-149.189	39.254	-5.757	-177.275	18.936	-18.523	15.641	73.879
244.8	185.554	79.856	64.7	14.597	43.326	12.827	-10.023	117.587	-53.575	42.425	-9.02	-112.992	17.226	10.592	-10.291	48.421
244.933	304.053	123.018	86.976	49.33	83.28	25.102	5.308	162.379	-49.673	38.872	-2.407	-111.155	2.354	32.998	-6.475	52.996
245.067	175.98	246.275	43.03	53.462	141.902	46.506	3.648	135.571	-52.834	23.075	-0.454	-201.002	7.142	24.848	-17.17	40.27
245.2	12.219	-50.825	47.993	59.884	14.983	90.104	9.092	111.634	-28.113	35.156	2.833	-206.982	-9.254	69.683	29.886	34.236
245.333	72.784	111.938	13.799	146.627	43.02	125.556	-15.684	89.38	-26.876	-47.942	2.091	-197.202	7.751	83.375	46.707	187.882
245.467	144.956	134.649	51.796	-67.106	97.283	52.715	-67.424	69.718	-12.979	43.577	14.802	-163.627	2.622	31.743	17.323	92.411
245.6	158.165	93.757	-13.541	6.152	78.127	-138.028	-32.351	108.616	-54.415	-7.057	-21.504	-270.869	-9.758	119.332	13.463	102.539
245.733	197.125	163.583	-46.513	49.934	74.519	-349.875	-46.403	170.646	-48.214	16.798	-5.464	-268.233	2.916	49.392	-5.344	104.987
245.867	305.078	88.869	-17.565	45.331	82.481	-490.605	-26.424	122.38	-53.462	74.778	2.677	-258.486	-1.97	61.728	20.762	199.182
246	276.89	105.301	-37.891	-26.513	78.702	-213.538	-15.062	74.489	-26.062	75.72	10.303	-283.595	-4.744	63.908	7.264	127.642
246.133	208.825	132.795	-33.711	-38.319	102.976	-237.169	14.923	88.624	-34.992	179.055	-0.848	-203.32	-1.769	15.867	5.244	273.838
246.267	289.587	145.706	58.167	-149.827	42.247	-153.646	-4.748	92.938	-24.325	138.409	-2.188	-116.101	-1.975	43.872	21.091	215.461
246.4	305.173	207.863	141.233	-213.431	65.101	-197.155	10.276	-16.1	-3.686	88.13	-21.428	-42.933	-11.392	74.439	17.82	221.799
246.533	241.121	147.84	-14.219	-154.009	28.467	-131.941	4.389	85.673	-50.957	145.13	16.316	-91.021	9.299	37.953	19.529	216.833
246.667	216.182	111.059	-74.461	-28.983	77.015	-252.377	13.892	213.959	-25.618	119.017	27.41	-68.785	-17.179	14.538	27.368	268.16
246.8	176.426	139.793	-75.957	-379.355	40.06	13.819	-55.353	146.728	-24.937	75.258	33.036	83.349	-9.289	41.435	53.621	246.417
246.933	101.552	133.591	-63.401	-209.173	62.11	-100.713	-40.172	120.057	-28.675	123.763	-6.831	-24.588	-3.933	56.478	34.624	165.757
247.067	-66.839	143.911	-78.408	-183.053	82.585	-110.317	-50.695	101.092	-22.948	107.105	-2.931	152.525	-1.435	-67.133	16.066	188.961
247.2	103.062	120.955	49.59	-170.365	55.377	-54.834	-18.347	153.042	-27.012	123.663	-12.931	76.175	-10.766	37.436	9.796	265.24
247.333	182.163	92.376	133.084	-142.661	94.999	-55.09	30.441	100.175	-11.577	87.193	-1.307	-73.321	4.145	26.862	3.971	83.851
247.467	247.296	101.648	63.574	-71.622	52.087	-43.945	16.83	124.442	-7.704	114.447	17.801	110.464	-22.218	14.536	-3.367	121.543
247.6	302.496	82.816	143.404	-109.352	50.838	-49.979	13.998	111.516	-4.341	106.401	-1.801	32.896	-10.475	-10.832	9.656	124.395
247.733	228.57	120.795	-17.065	-87.795	63.715	-30.667	13.745	142.974	-10.003	100.339	1.061	16.205	-14.819	24.642	12.477	128.666
247.867	216.48	161.745	-214.462	-111.391	209.955	-21.482	14.416	148.898	-1.871	-12.36	-1.658	21.086	-28.47	77.737	3.127	292.086
248	261.337	127.346	-373.286	-143.27	150.13	6.161	33.905	126.584	-2.885	204.985	2.305	-16.944	-3.112	87.166	-15.679	74.588
248.133	404.874	145.187	-243.082	39.059	39.574	-14.616	12.257	117.752	-6.918	80.942	7.767	-22.486	-29.762	16.648	8.563	187.158
248.267	112.406	16.61	-115.899	-3.26	-32.593	-8.923	14.594	91.058	-2.325	-13.1	2.294	2.363	-2.565	36.36	0.272	-45.391
248.4	371.401	379.832	-105.194	53.78	169.35	-39.007	8.761	68.261	-0.898	123.369	15.988	-5.809	-13.183	22.926	-1.412	56.561
248.533	251.294	-92.274	-97.375	10.405	63.09	-31.844	-4.975	81.177	-7.288	78.719	7.806	16.781	1.448	44.713	-8.019	167.201
248.667	55.891	556.183	-45.209	-17.17	29.379	-36.897	37.847	143.977	16.097	122.111	2.913	94.949	-6.015	90.542	-14.754	55.715
248.8	304.243	-90.167	-8.466	-104.595	20.389	-8.702	47.718	110.799	-16.722	113.701	2.509	-66.404	-54.223	-5.457	4.419	-32.705
248.933	193.575	180.76	-3.925	-32.856	48.453	-32.403	68.844	100.511	8.069	112.68	6.11	-65.838	-99.01	58.895	-3.399	59.358
249.067	248.827	151.498	14.876	11.144	54.956	-6.654	73.073	159.839	-16.207	73.632	4.166	12.563	-67.608	6.638	-18.445	150.577
249.2	333.836	205.494	16.05	-17.97	27.482	-47.078	17.809	192.198	16.905	95.054	3.405	-9.103	-79.51	26.501	-32.951	186.263
249.333	339.799	4.606	13.528	23.43	58.294	-250.742	42.544	120.71	2.264	91.476	-9.057	-117.822	-29.042	56.078	-8.015	233.585
249.467	173.008	139.964	-68.241	90.095	25.332	-107.446	15.954	92.297	-3.182	76.307	-3.298	-122.133	-42.421	53.892	-14.516	89.871
249.6	195.266	146.196	163.015	45.819	26.603	-230.787	20.839	156.812	-28.197	71.293	8.517	-107.641	-19.468	15.253	-5.192	168.765
249.733	223.197	155.698	-87.928	64.368	36.295	-201.368	19.853	178.009	9.637	63.713	-3.975	-112.696	-29.761	20.118	9.254	121.204
249.867	131.979	487.307	200.073	111.399	24.674	-293.625	34.47	165.476	-5.405	118.168	13.939	-81.096	-28.719	7.426	-21.419	-47.771
250	203.224	-279.722	16.447	144.756	38.389	-199.595	83.73	192.669	1.345	88.182	0.636	-71.523	-60.853	30.232	-27.218	-17.481
250.133	156.255	269.983	82.944	121.629	39.008	-180.473	142.493	101.313	-6.764	107.122	0.826	-12.707	-82.346	-17.092	-38.052	87.769
250.267	171.468	174.371	-15.388	161.09	67.751	-210.746	63.349	170.655	-3.56	126.858	8.797	-22.095	-54.76	59.582	-78.457	19.447
250.4	248.272	44.365	12.21	58.819	49.211	-189.001	99.119	153.474	9.911	47.979	2.87	-12.594	-30.009	32.452	-74.992	12.311
250.533	241.191	132.917	6.371	168.97	58.794	-186.304	91.315	152.71	21.784	181.818	0.627	-64.089	25.205	16.137	-61.936	24.122
250.667	256.282	120.831	92.85	20.04	-148.259	-247.246	47.49	128.375	35.254	-54.039	-1.983	-367.354	29.044	24.003	-114.984	135.529
250.8	207.398	7.123	117.434	-69.553	204.929	-90.596	51.794	148.381	-3.408	8.22	-14.966	-190.857	245.135	56.736	16.93	55.976
250.933	181.893	248.434	156.203	187.301	19.989	-77.58	89.382	145.469	21.668	154.232	22.973	-125.812	143.095	-4.373	-96.996	97.122
251.067	194.08	132.043	70.607	-48.274	47.764	-83.968	41.089	202.209	-1.338	-1.185	-5.97	-68.739	43.066	150.439	-44.753	91.293
251.2	192.542	-65.979	63.861	19.744	27.176	15.547	66.923	159.141	7.185	-91.045	-14.326	-27.456	11.774	-8.957	-54.701	83.393
251.333	207.726	36.899	44.815	49.382	35.914	-25.87	68.077	118.185	-5.199	-0.659	12.039	-27.537	-15.13	-3.98	-66.511	89.583
251.467	227.675	499.963	83.05	66.461	63.029	-9.456	45.09	138.489	19.52	10.575	-4.529	24.456	-20.109	14.562	-106.204	74.786
251.6	363.407	-120.525	43.253	159.811	2.879	44.608	67.536	90.783	11.239	9.163	-0.193	47.401	-28.965	26.166	-135.649	32.219
251.733	144.717	109.154	40.92	39.763	49.999	8.04	63.164	80.055	-12.503	-13.382	2.251	48.258	8.057	11.391	-16.58	38.089
251.867	97.644	202.076	131.199	35.979	-10.474	-15.075	36.43	61.716	-15.531	1.172	13.128	169.283	-91.885	5.168	4.221	16.421
252	88.094	54.895	153.835	142.826	17.034	12.327	56.991	52.537	117.966	23.06	4.166	62.918	86.532	127.082	-42.664	84.865
252.133	111.734	52.553	9.136	-50.768	26.18	105.052	53.264	90.328	-100.612	3.434	12.026	70.215	17.784	-328.146	-95.44	33.522
252.267	-147.641	71.39	0.142	-63.745	57.237	115.428	57.788	103.436	-10.491	3.421	-11.792	156.299	-5.711	91.381	-25.171	87.486
252.4	-248.732	13.928	-31.629	170.354	24.135	116.707	56.571	82.669	-18.392	-1.481	6.344	198.46	6.271	19.523	-29.442	108.291
252.533	-223.726	4.784	83.452	33.382	2.101	114.615	69.56	41.282	-3.687	11.22	9.583	156.123	-9.805	-21.547	-13.704	117.114
252.667	-234.02	9.636	26.354	1.409	-11.891	61.279	55.299	-14.954	44.569	-6.81	-3.794	76.763	5.41	23.777	-7.194	83.864
252.8	-246.072	7.906	9.604	48.378	31.75	42.661	63.255	34.793	11.568	-16.999	-0.299	121.492	-4.134	-55.797	-41.721	-12.148
252.933	-225.688	-58.962	-8.514	15.167	3.728	47.278	6.456	38.035	12.182	10.947	-4.609	112.625	1.506	140.187	-21.985	184.224
253.067	-250.72	-26.894	8.493	-15.023	-19.268	61.356	11.73	68.256	34.039	2.39	-17.159	55.832	28.457	107.135	-111.698	38.495
253.2	-199.739	13.319	-59.326	2.047	29.943	25.495	78.323	69.494	30.716	-23.897	0.241	22.805	9.481	32.188	-22.448	24.536
253.333	-212.658	75.415	70.185	-112.941	-54.808	51.933	3.952	43.184	11.54	78.218	37.413	-1.52	-10.971	37.331	-120.98	-7.648
253.467	-314.448	-37.152	11.566	115.393	-121.745	42.959	34.277	59.945	68.891	29.414	44.278	125.06	45	82.142	110.385	0.833
253.6	-324.175	11.894	-12.773	59.644	123.874	11.846	3.171	70.727	4.298	-100.974	-2.267	92.299	11.976	36.557	-36.343	-12.651
253.733	-125.858	-21.57	-31.671	-29.211	-86.88	9.061	-15.739	108.136	-22.454	-51.327	6.348	40.87	-62.046	8.159	-9.606	-29.032
253.867	-206.059	-58.711	-165.077	-20.633	7.418	28.385	-9.266	99.548	7.475	-122.772	2.989	17.783	33.061	41.578	29.812	-46.693
254	-168.915	-185.97	-204.349	26.09	13.454	37.008	-23.742	49.445	48.576	-184.184	-7.321	-14.554	92.346	-6.626	2.968	-215.398
254.133	-52.214	84.59	-200.338	-37.193	124.262	15.509	1.711	24.728	-7.828	-165.538	-0.978	53.102	16.015	25.747	-8.196	-197.973
254.267	-11.459	219.819	-140.575	-72.63	40.441	-0.686	-4.979	77.2	3.19	-209.013	1.286	-15.156	39.481	27.36	5.548	-270.069
254.4	142.588	-236.94	-136.571	49.401	2.754	22.703	18.949	103.025	3.092	-229.948	3.802	31.033	-92.256	-58.363	-10.1	-254.603
254.533	181.82	237.879	-60.676	77.922	-9.45	19.405	-5.43	80.51	-12.476	-231.523	-0.41	32.76	102.675	51.039	-22.653	-185.095
254.667	174.835	103.611	-102.055	83.607	-150.545	-16.16	6.668	122.79	-4.444	-139.095	2.138	59.358	-7.403	-16.98	7.275	-80.388
254.8	217.839	75.249	-98.296	20.601	44.681	30.952	8.417	122.144	-8.085	-174.226	-6.141	25.587	-6.763	47.553	13.995	-229.38
254.933	277.628	-59.642	-65.547	155.048	-12.131	8.989	-9.2	123.656	24.153	-149.937	8.749	55.492	-6.845	-16.897	11.83	-206.12
255.067	200.788	178.541	-82.016	55.691	152.885	6.729	43.254	100.648	-15.037	-5.39	-4.886	-8.09	46.577	10.522	-23.465	-96.72
255.2	139.153	54.428	-19.799	52.199	-45.22	1.225	3.262	128.3	11.014	10.459	-1.781	80.251	12.135	22.96	-3.521	40.129
255.333	189.884	71.25	-41.826	15.87	22.136	4.297	16.977	90.641	4.746	27.962	-4.99	165.616	-26.236	-105.362	12.285	-15.102
255.467	209.293	46.442	-11.933	-12.042	9.992	6.843	21.807	70.09	-8.872	11.789	19.307	220.653	16.909	18.783	21.766	-57.484
255.6	202.164	72.732	53.653	5.431	6.772	-41.32	-7.124	96.674	22.572	14.392	2.301	117.935	-11.624	-65.193	2.758	34.512
255.733	220.714	92.995	62.723	8.721	-4.071	-257.375	59.65	41.532	4.479	7.573	4.678	88.53	30.563	61.523	-8.278	143.512
255.867	193.035	34.678	30.549	41.234	-10.564	-610.882	17.693	101.565	8.05	28.269	3.594	-1.859	5.432	-144.203	11.808	26.537
256	73.342	-19.215	113.63	-10.223	-154.069	-608.857	-8.065	71.178	-2.838	23.64	-1.554	75.285	-16.61	-96.147	14.012	-20.558
256.133	161.048	29.977	-1.71	-49.003	46.03	-346.219	1.404	96.738	22.362	39.469	-1.912	101.481	6.985	-147.022	-2.805	36.572
256.267	150.502	59.836	38.727	-30.007	-10.995	-182.866	-8.68	45.29	-17.193	4.802	-2.041	109.517	31.017	-151.046	26.402	13.573
256.4	156.772	44.408	71.24	-113.969	15.439	-47.487	-8.731	68.901	18.695	45.452	10.441	63.061	10.269	-165.498	-10.508	202.603
256.533	275.705	39.931	45.145	145.849	-5.5	-16.373	3.655	52.555	-2.385	69.496	-5.266	164.034	28.238	-90.054	20.756	201.763
256.667	143.817	9.718	123.638	-3.653	-18.199	-114.449	20.446	84.617	13.896	75.358	-19.365	22.126	45.22	-60.566	45.624	102.039
256.8	123.906	8.781	95.086	40.158	125.37	2.482	75.019	41.042	0.342	23.763	-8.946	55.218	-19.036	-248.276	23.35	87.851
256.933	138.319	5.998	85.357	29.765	18.854	-21.519	120.291	112.323	3.203	120.05	2.862	-0.615	7.383	-8.233	40.198	130.112
257.067	157.817	6.756	-13.98	-19.11	-0.759	-28.225	86.615	18.049	-4.487	158.097	7.939	36.156	21.956	-11.047	55.624	96.727
257.2	152.301	-14.618	-2.112	-2.546	18.772	37.042	26.452	40.607	-1.253	138.526	2.245	39.127	0.415	31.028	68.315	46.693
257.333	124.442	10.67	153.014	144.051	39.374	123.86	43.983	114.207	-9.784	125.459	21.796	113.672	2.985	53.034	64.398	24.222
257.467	150.8	19.469	-43.053	-148.963	-22.854	-117.393	5.777	126.378	4.813	57.517	-7.128	62.662	-1.489	3.832	53.936	110.911
257.6	219.771	24.339	81.91	-47.216	-4.942	-23.856	72.837	42.983	0.622	97.574	2.72	-6.832	-3.822	20.112	30.19	140.847
257.733	191.794	-34.714	76.677	-140.032	8.786	-7.003	98.454	112.172	5.387	131.096	-5.73	48.932	-51.434	-26.084	7.707	94.916
257.867	36.286	83.057	-24.249	160.314	29.276	-4.039	62.5	144.392	3.933	135.354	11.391	101.41	-13.306	22.02	10.253	94.542
258	214.679	46.98	13.66	2.584	-42.143	146.863	47.139	152.432	-8.894	162.362	-10.956	136.026	13.726	22.315	15.141	119.61
258.133	92.341	3.526	10.667	-54.758	16.866	-5.457	53.584	122.682	4.127	101.293	11.5	80.753	-11.413	42.035	7.603	71.062
258.267	63.99	5.144	-24.624	-62.332	-107.791	-100.824	56.954	137.984	-0.417	76.123	1.606	116.761	38.372	121.511	-5.45	106.369
258.4	109.138	-117.896	78.78	34.353	17.128	18.595	77.739	107.985	8.853	105.978	-13.257	78.715	-14.45	145.799	-15.052	134.972
258.533	99.78	148.137	62.344	161.746	32.401	31.541	142.732	89.453	11.692	82.38	-13.6	31.312	-14.296	242.754	22.82	167.68
258.667	99.599	44.856	154.49	144.086	71.449	-127.278	66.661	160.799	-9.17	40.186	25.514	35.707	-5.606	131.867	10.189	137.194
258.8	109.698	-17.594	-67.202	-33.358	65.285	139.357	-29.205	139.385	16.648	46.659	8.51	25.277	16.087	-120.459	-5.719	46.103
258.933	120.337	46.402	66.665	18.268	64.375	10.845	37.895	140.574	0.749	21.487	9.797	36.915	-30.815	53.575	-13.581	11.758
259.067	45.37	110.929	13.296	27.085	36.25	-20.164	25.258	75.419	-3.793	5.875	5.675	-72.992	147.487	-9.237	7.701	22.829
259.2	104.892	156.523	73.624	-4.14	15.311	9.214	29.679	70.357	16.721	40.259	-2.526	15.492	145.497	11.115	54.319	41.341
259.333	145.023	-194.444	151.452	-33.831	135.921	9.806	110.877	115.13	-5.976	-15.294	0.994	43.452	12.191	-7.275	5.875	159.929
259.467	148.759	272.268	-2.878	-14.589	4.804	21.078	-62.905	70.847	7.078	-4.101	-12.781	36.498	2.338	18.861	23.421	107.995
259.6	157.733	-163.008	131.259	-137.661	-9.633	-15.16	62.298	87.348	-13.349	117.351	18.884	102.533	16.074	28.756	84.745	106.571
259.733	152.911	225.66	99.338	177.028	-5.144	26.725	9.346	81.58	1.847	-113.497	-5.879	76.709	-14.617	53.924	86.295	100.789
259.867	161.844	-207.663	104.547	-20.658	15.896	13.353	43.211	29.049	-9.27	8.707	10.036	110.603	23.465	67.085	17.053	47.34
260	191.168	211.551	91.193	145.958	-4.389	-13.389	102.767	28.795	6.702	-8.828	11.052	241.175	14.422	126.861	26.652	56.093
260.133	181.525	73.322	64.809	-96.862	7.989	38.436	23.413	-1.958	3.172	8.518	-6.51	117.32	-16.908	-97.437	6.328	58.679
260.267	120.512	9.859	67.135	15.417	40.275	46.757	66.279	-21.914	5.786	6.042	-29.04	76.702	6.555	-8.338	19.74	35.959
260.4	126.414	91.694	-40.061	45.192	29.786	37.285	10.363	31.475	-11.574	5.609	-4.542	94.791	-3.116	-15.636	43.171	43.62
260.533	-6.063	100.604	56.26	3.156	-102.763	26.762	50.661	38.391	4.021	68.01	-14.032	155.398	12.411	51.734	17.376	37.822
260.667	154.097	357.672	78.853	-22.844	57.931	45.133	26.037	71.753	1.332	85.978	17.917	60.875	4.059	16.377	12.596	15.239
260.8	333.864	-160.183	6.083	23.041	82.013	115.642	58.971	18.12	5.884	58.021	18.689	24.033	4.508	10.01	-5.833	34.973
260.933	193.56	277.907	5.051	43.616	85.108	-44.975	118.432	-34.208	5.261	36.189	4.284	39.235	-119.235	-8.03	18.462	-1.717
261.067	197.145	-88.254	21.805	26.842	81.152	64.625	-75.216	-144.928	4.584	37.392	-7.151	26.196	111.583	3.326	-3.343	1.869
261.2	159.047	41.462	-61.29	5.77	50.668	30.514	55.448	-228.222	6.197	32.227	7.931	82.741	-12.185	-18.797	35.146	0.46
261.333	123.902	125.582	45.31	-9.451	-3.258	-14.639	40.508	-185.403	-8.517	39.629	11.572	122.881	4.972	45.002	-20.372	4.405
261.467	93.122	-63.28	25.233	23.087	73.053	60.288	129.906	-276.819	27.407	51.202	-2.793	75.329	3.367	5.68	-22.244	7.83
261.6	79.912	153.859	27.2	10.152	42.34	147.285	-72.863	-316.755	-30.206	58.782	2.793	68.395	17.843	-31.831	-19.111	-126.319
261.733	150.224	161.835	-6.923	12.165	7.468	15.825	143.165	-289.451	27.765	55.291	9.8	55.408	0.47	-58.304	-28.012	-237.578
261.867	111.564	123.85	-13.379	0.823	19.453	165.901	57.143	-324.533	-1.671	74.076	29.422	44.318	-18.406	-179.635	14.104	-346.603
262	106.427	-2.95	1.503	6.978	20.184	23.87	-38.364	-275.38	-0.445	127.027	-19.857	46.303	-8.573	-196.755	33.074	-332.116
262.133	74.957	-317.575	-54.367	8.998	-27.845	24.839	179.23	-291.293	-0.327	58.295	0.57	19.604	-1.303	-136.159	3.296	-316.252
262.267	74.027	208.85	23.911	-1.681	5.897	59.379	39.89	-240.053	-2.243	55.334	8.976	-3.663	-11.985	-140.877	0.739	-182.563
262.4	135.894	660.624	-37.555	-2.371	-19.228	124.792	-49.676	-272.303	3.304	45.246	-1.427	-13.748	-11.444	-176.062	27.482	-26.976
262.533	202.116	-270.699	-180.614	4.078	-4.781	172.415	145.416	-207.55	-5.928	54.027	7.501	3.56	6.433	-19.504	30.467	-119.225
262.667	258.019	41.289	-255.445	150.422	-15.037	-130.055	4.571	-223.146	1.418	22.819	-2.847	14.213	-2.242	20.203	10.908	-325.901
262.8	-23.214	82.746	-382.358	-163.751	-5.06	216.44	-71.549	-187.235	-14.286	-7.998	26.005	29.359	5.004	29.953	-16.317	-213.037
262.933	165.864	101.326	-267.369	7.155	128.579	28.304	23.492	-107.059	-2.842	4.128	-6.715	50.822	23.29	70.425	23.845	-258.305
263.067	250.534	334.158	-356.96	-3.198	7.397	21.266	37.576	-38.405	-22.97	10.381	-3.463	44.519	-5.47	72.565	1.629	-242.331
263.2	195.426	-146.707	-301.203	5.757	-8.175	15.44	64.157	4.289	35.697	-7.303	2.025	36.227	-25.541	167.774	1.942	-309.439
263.333	237.001	319.285	-225.991	-16.638	23.286	-12.918	125.663	98.931	-5.475	4.664	-0.934	41.989	-0.526	53.456	6.18	-425.457
263.467	196.609	-212.606	-244.282	4.964	11.768	51.643	39.863	70.395	0.321	-1.957	-27.834	28.17	-6.608	136.873	-6.754	-176.827
263.6	178.788	363.552	-165.879	-24.756	2.738	23.722	27.241	37.163	-2.683	-4.457	5.219	-6.293	-18.245	59.247	10.207	-55.728
263.733	170.778	-146.445	-201.49	-32.864	-96.617	47.391	5.047	16.962	-46.232	-15.834	22.639	34.361	4.547	72.021	8.418	94.323
263.867	184.565	258.021	-145.634	-3.658	-44.569	53.168	58.339	115.004	-71.724	20.643	2.094	3.594	23.41	23.444	-5.047	84.764
264	220.903	-31.768	-78.445	143.089	146.597	50.496	80.939	127.967	-49.107	-11.724	-22.181	-4.089	-109.94	114.291	-7.011	72.42
264.133	210.01	60.782	-51.504	-117.395	-146.502	237.552	-69.237	139.693	-92.089	8.788	16.504	-20.409	95.739	46.307	38.556	22.03
264.267	199.929	35.724	18.808	3.476	-28.673	35.364	43.604	128.417	-75.362	-4.963	15.954	-63.982	8.036	81.56	6.079	9.189
264.4	192.251	397.297	21.246	-22.411	-34.661	-114.429	74.766	98.295	-62.269	-20.066	-7.683	-122.896	-16.506	35.253	11.668	-107.819
264.533	248.738	-101.362	22.643	78.537	-39.439	59.365	128.061	164.896	-23.125	-1.442	-8.936	-146.706	0.603	108.571	3.577	-322.766
264.667	182.578	146.006	155.766	22.749	-61.439	47.244	12.682	176.798	-13.981	-10.35	0.342	-170.509	-58.96	-10.893	23.784	-252.282
264.8	144.697	37.812	17.339	25.922	30.051	17.271	-0.572	177.648	-13.412	-35.943	5.525	-405.889	-128.205	58.06	35.295	-246.675
264.933	139.464	418.952	77.839	12.383	-62.159	62.507	26.26	183.815	-9.429	-119.123	6.008	-303.698	-81.414	90.468	43.407	-232.101
265.067	180.956	149.778	37.026	-7.133	-40.33	18.191	7.55	167.553	2.464	-79.989	-1.523	-332.063	-78.592	74.008	11.745	-189.206
265.2	226.523	74.344	60.819	16.678	-10.266	52.698	6.561	222.749	-13.393	-200.388	0	-359.33	-207.64	21.139	21.882	-174.559
265.333	208.434	139.633	17.702	58.825	-14.16	-124.991	45.784	216.082	1.393	-165.411	14.01	-250.68	-119.921	49.536	15.094	-45.614
265.467	260.42	-317.402	39.205	77.141	-52.565	245.184	3.219	129.096	9.351	-207.684	-9.187	-264.155	-104.864	45.334	25.701	-116.108
265.6	249.331	311.266	-6.071	12.113	-13.479	110.276	-74.934	100.29	-14.581	-199.807	-9.739	-206.99	-114.804	76.635	148.446	-92.767
265.733	212.008	72.826	-17.31	6.686	-84.853	28.944	26.111	44.589	6.491	-155.954	-1.507	-184.075	-18.03	94.991	18.286	-62.12
265.867	174.002	78.637	97.345	27.899	8.142	43.445	49.244	194.051	-7.016	-181.146	1.549	-125.564	-166.466	41.111	66.198	-124.344
266	176.741	81.011	159.428	23.013	-35.712	34.679	113.438	207.239	12.067	-184.63	1.232	-119.326	56.629	85.972	6.52	-30.937
266.133	141.898	-17.621	185.141	41.504	-14.295	42.276	34.268	113.241	13.122	-224.466	-0.961	-248.982	-52.358	-2.494	-121.309	68.992
266.267	165.648	106.398	41.937	-7.433	-15.431	10.232	-5.414	113.101	27.245	-177.905	3.106	-124.962	-99.92	38.315	122.236	-13.59
266.4	97.101	117.852	16.011	-12.623	-24.858	-122.618	24.11	96.108	52.267	-149.555	18.764	-125.304	11.41	8.812	-121.494	13.793
[truncated: 1,677 more rows]
