# Supplementary material for: Precise optical control of gene expression in C elegans using improved genetic code expansion and Cre recombinase
Source: eLife journal article supplement (doi:10.7554/elife.67075), 2021-08-05
Supplement: supp [file 2PLM+ATR_1s_Raw.xlsx]

## Sheet: Sheet1
Time(s)	T1	T2	T3	T4	T5	T1	T2	T3	T4
0	0	0	0	0	0	0	0	0	0
0.133	76.083	66.436	-7.228	-2.048	18.219	-104.161	-7.473	-98.841	3.08
0.267	-5.088	67.176	7.51	-2.285	20.817	-41.705	-27.937	119.844	9.833
0.4	-10.341	96.995	48.878	-5.297	50.942	-58.876	21.587	11.548	1.468
0.533	-26.613	59.392	-3.594	-6.945	53.682	-110.821	6.387	15.925	18.696
0.667	-141.913	67.184	-12.413	12.559	16.919	-87.71	-9.388	12.417	-16.959
0.8	-1.552	41.825	-144.124	-34.501	-11.639	-83.499	25.574	-5.8	29.047
0.933	93.771	41.547	-79.079	-13.264	18.389	-99.718	-16.495	-6.911	-7.52
1.067	5.656	52.642	11.456	-59.108	-4.787	-86.034	-4.289	15.196	-2.997
1.2	-38.328	-3.196	5.783	-37.167	-19.509	-95.531	-10.504	-12.6	8.744
1.333	-283.251	-12.234	-26.808	-36.315	46.018	-139.94	-6.849	22.405	-130.196
1.467	154.156	65.235	8.904	-41.347	21.085	-84.425	-8.144	4.752	127.324
1.6	-257.601	27.271	22.431	-12.706	12.761	-72.859	-43.341	70.867	-11.732
1.733	-130.34	26.034	-11.928	-26.202	-2.51	-45.672	-90.87	-7.79	18.315
1.867	-186.012	32.374	21.132	-16.464	-3.079	-143.993	-144.875	46.583	-15.956
2	-103.06	38.879	15.34	-34.937	5.598	-129.555	-153.857	34.928	-8.919
2.133	-99.26	15.31	-23.073	-30.674	-2.326	-111.383	-201.92	12.123	16.474
2.267	-129.551	38.084	8.177	-0.842	-10.575	-115.743	-231.781	18.733	6.401
2.4	-105.103	16.968	-7.639	-55.246	-13.065	-77.759	-208.732	14.12	-13.97
2.533	-53.655	10.546	6.789	-7.929	1.891	-43.893	-140.409	-102.467	87.116
2.667	-81.42	32.247	-10.332	-21.967	12.278	7.609	-150.049	132.583	-19.105
2.8	-72.445	-24.526	-1.067	-10.742	3.047	-27.126	-93.055	17.733	11.847
2.933	-25.494	21.507	2.923	-3.208	8.711	-38.423	-129.367	-96.971	14.023
3.067	-6.698	31.389	13.14	-32.886	13.663	-50.261	-281.078	8.943	13.747
3.2	160.894	-12.615	4.603	-26.458	-10.735	-121.112	9.678	128.332	-92.592
3.333	60.341	-11.898	5.508	-15.631	-7.002	-162.744	-148.856	-18.643	-10.369
3.467	34.24	-51.002	4.127	16.857	-3.317	-85.521	-52.119	27.129	-7.059
3.6	-78.123	-105.93	7.799	-6.508	8.254	-111.971	-103.787	-2.796	3.848
3.733	8.616	-217.308	3.677	-48.342	-14.611	-85.804	-42.045	11.51	6.253
3.867	120.478	-208.588	-10.528	-10.385	-4.378	-93.303	-57.655	-28.138	1.933
4	77.802	-214.929	15.045	-45.163	21.18	-91.615	-54.745	9.36	2.089
4.133	-58.155	-197.301	1.942	-38.593	117.294	-74.061	19.275	-19.466	-4.467
4.267	56.929	-164.462	3.451	-72.773	9.637	-35.445	45.808	-10.787	-8.066
4.4	48.822	-248.923	7.515	-28.613	-3.197	-23.969	-3.877	2.966	-55.036
4.533	13.792	-121.549	-8.276	-3.709	-108.738	13.719	72.319	-24.258	-134.064
4.667	45.706	-28.817	-9.187	10.434	-4.028	-8.947	14.454	-115.9	-102.65
4.8	10.704	31.533	7.64	-29.314	3.931	-22.417	27.81	-23.753	-93.751
4.933	43.57	-62.206	11.697	53.831	3.855	-17.072	53.918	93.64	-140.353
5.067	78.247	32.412	-21.605	21.59	-15.065	3.775	123.769	-7.917	-156.36
5.2	62.801	11.216	9.648	13.126	4.534	-18.362	29.975	10.89	-130.036
5.333	48.819	-52.866	6.043	24.802	-10.665	3.539	59.192	-128.16	-80.925
5.467	19.643	73.053	4.512	-34.176	-11.684	-2.721	-35.75	8.749	-19.578
5.6	55.769	-65.51	-4.478	-5.424	14.215	-34.791	53.819	46.332	-19.062
5.733	260.261	42.579	-9.69	-2.686	114.096	-48.179	47.889	39.16	-28.426
5.867	68.031	129.563	-14.253	-20.725	-5.232	-15.737	40.09	99.994	-29.344
6	22.167	182.765	19.367	39.03	-94.161	-58.461	25.132	49.997	-10.362
6.133	121.492	118.658	6.557	-19.85	-14.998	-21.071	90.024	33.313	33.516
6.267	7.854	164.173	-10.606	-10.821	7.615	-26.407	31.756	21.015	16.303
6.4	-28.82	53.892	5.449	35.196	8.154	-34.325	-14.107	37.292	21.943
6.533	-80.523	34.655	-14.616	42.645	-2.127	-44.823	38.154	16.39	39.785
6.667	56.183	8.371	15.401	68.952	-24.484	-18.094	5.363	12.61	-28.941
6.8	60.736	18.368	-15.988	59.456	125.364	-22.749	109.815	4	-45.386
6.933	86.411	50.352	-11.766	70.807	-119.989	-25.025	72.507	14.643	-85.922
7.067	78.106	-7.157	-1.469	61.224	117.611	-25.899	159.404	11.271	-79.376
7.2	99.991	18.18	-13.061	46.937	-1.751	-58.894	269.627	-2.343	-95.126
7.333	25.508	-69.45	-8.462	54.901	22.629	-64.72	119.268	29.997	-42.727
7.467	73.873	-11.531	17.591	58.376	-8.323	-75.094	108.545	22.283	-238.056
7.6	95.677	77.248	-17.995	18.495	-126.034	-79.51	128.082	-4.16	-83.817
7.733	93.267	36.49	-2.938	18.207	-2.147	7.917	133.793	15.078	-125.36
7.867	103.394	33.418	-11	2.864	102.971	2.363	108.153	15.457	-103.933
8	169.528	51.077	-4.043	66.773	-124.712	-62.905	143.756	115.058	-176.229
8.133	-69.44	27.543	-3.394	22.735	16.65	-9.969	29.003	-36.435	-21.63
8.267	-12.088	12.166	-12.632	-6.092	2.578	-71.094	194.55	-165.166	-193.973
8.4	-9.865	13.979	3.953	-6.592	106.257	-25.905	28.924	-104.888	-52.776
8.533	-28.487	14.926	-4.509	20.682	-29.538	-27.784	54.184	-123.207	-146.308
8.667	33.408	43.514	17.54	66.815	-91.803	-32.547	84.125	-72.084	-32.558
8.8	-9.869	22.947	-17.898	34.685	112.722	-57.16	54.669	-41.273	-132.891
8.933	19.183	42.888	21.601	79.88	8.616	-95.497	51.331	-53.852	37.749
9.067	-14.934	45.478	-19.586	159.258	-92.047	-61.211	64.285	-69.938	15.768
9.2	-6.889	22.656	-18.727	146.317	13.061	-13.014	53.038	-24.678	26.011
9.333	29.797	87.177	-28.413	33.978	133.47	-10.346	14.528	-66.643	63.145
9.467	73.759	140.697	-21.294	41.116	15.221	29.62	62.156	-57.986	68.725
9.6	59.793	89.383	46.68	19.238	42.629	-27.27	59.216	-50.464	12.585
9.733	37.116	54.738	115.338	8.832	33.987	11.914	49.944	23.589	44.213
9.867	41.324	16.801	132.975	45.198	23.952	-24.173	90.113	23.748	90.953
10	79.653	4.675	44.951	58.058	25.961	-45.949	117.365	22.198	88.114
10.133	102.51	14.412	24.531	34.141	26.698	-92.388	84.773	6.628	42.129
10.267	51.981	-29.864	24.824	47.189	9.392	-81.324	81.97	41.184	48.239
10.4	40.957	-44.337	-15.92	43.727	2.214	-63.493	105.481	69.945	45.712
10.533	53.656	18.042	-30.416	3.259	0.816	-15.366	87.321	77.309	52.402
10.667	79.355	31.045	-42.001	12.786	25.268	-51.444	80.465	46.202	84.343
10.8	79.459	29.739	-24.349	-10.459	-17.555	-29.488	-4.594	32.594	38.298
10.933	63.173	45.846	19.492	16.028	15.99	-93.929	-25.147	55.36	47.981
11.067	6.577	35.103	-22.723	19.594	1.137	-58.241	-16.318	100.015	34.56
11.2	63.308	2.734	13.482	77.429	-0.781	-56.719	56.031	54.303	-9.186
11.333	163.203	-9.545	20.863	76.274	-19.728	-2.405	-22.2	30.839	6.029
11.467	18.773	16.231	29.589	102.952	-7.507	3.619	40.071	0.806	24.444
11.6	60.486	50.556	70.914	58.144	-9.645	-23.225	111.884	7.933	47.957
11.733	45.269	7.958	68.498	65.902	-91.912	-71.694	41.233	21.729	16.368
11.867	91.498	-34.576	19.706	-3.181	-149.702	-75.65	27.245	15.848	32.55
12	7.233	-13.963	6.396	24.584	-221.503	-2.968	36.516	2.991	11.726
12.133	37.461	77.548	47.9	-34.628	-91.387	-201.162	135.798	-6.939	46.403
12.267	59.548	88.766	11.342	37.662	-67.328	-149.151	15.021	1.714	-5.781
12.4	57.346	149.067	7.176	17.641	-51.938	-101.928	175.973	15.771	58.662
12.533	43.122	50.559	52.725	40.257	-67.256	-45.78	86.947	74.158	90.472
12.667	55.863	54.003	93.857	-29.051	-63.332	-84.968	7.074	111.334	73.816
12.8	23.768	39.695	50.779	17.236	-23.358	-83.04	-69.013	104.418	109.711
12.933	84.477	48.186	11.782	13.192	-45.86	-99.234	95.02	100.165	47.286
13.067	31.333	29.853	12.545	59.912	-59.743	22.65	65.17	77.127	80.643
13.2	26.202	11.257	66.317	-15.356	-46.694	-123.815	24.134	54.065	51.228
13.333	57.03	20.28	127.578	21.866	-30.692	17.878	73.342	44.367	10.298
13.467	-3.37	7.76	86.893	41.789	-14.926	-79.038	31.446	62.136	50.665
13.6	-9.018	45.517	86.612	39.543	-5.549	-199.484	165.681	71.468	111.772
13.733	22.985	-5.146	30.422	111.994	-19.094	-70.412	56.703	59.87	73.334
13.867	35.482	-5.595	-31.99	51.559	16.055	-68.169	40.312	67.472	125.919
14	66.025	-14.09	-49.174	61.151	20.449	-59.111	-88.62	-60.158	108.108
14.133	67.046	19.365	-35.328	61.845	2.339	-34.216	60.869	131.49	118.687
14.267	47.773	-6.878	-4.99	93.585	30.719	-55.181	54.617	55.889	95.354
14.4	39.735	7.925	69.082	79.816	58.767	-10.016	84.98	19.225	81.974
14.533	25.04	94.531	76.419	28.762	37.523	-24.374	-286.165	20.939	45.539
14.667	32.795	-98.8	78.688	89.703	44.757	40.348	-263.652	-17.049	154.196
14.8	52.465	-47.08	120.447	56.155	4.445	-78.982	57.243	21.029	83.842
14.933	81.488	-29.923	8.884	73.84	37.771	-93.864	-142.381	-11.426	68.557
15.067	48.903	-48.609	18.789	45.502	173.423	-49.255	9.722	-2.384	-20.891
15.2	52.348	-51.481	3.828	54.201	-80.538	-43.02	25.609	-102.784	16.719
15.333	36.84	-264.235	-22.81	55.016	106.538	8.121	78.281	-5.553	24.732
15.467	28.205	-127.782	-48.503	15.28	-82.273	64.864	-1.525	131.831	27.277
15.6	12.162	-83.669	-59.105	41.555	5.062	-88.614	114.978	-84.668	54.336
15.733	-7.646	-101.866	3.784	44.154	25.152	14.176	-71.191	-7.806	94.017
15.867	10.329	-108.648	86.414	31.855	19.38	-13.258	58.462	104.227	51.225
16	31.922	-133.028	-6.418	23.99	14.784	-73.99	42.147	10.463	31.565
16.133	12.859	-190.794	-12.781	28.229	105.246	-34.975	60.867	-21.821	59.403
16.267	29.259	-116.025	-89.638	41.246	12.37	-13.854	59.18	-7.206	18.961
16.4	6.437	-59.319	-111.528	-15.78	-98.513	-40.874	16.432	-32.83	34.139
16.533	-16.227	-116.955	-91.896	43.252	25.507	-41.031	101.831	16.385	80.802
16.667	-11.462	-211.361	-92.921	27.634	44.318	-77.229	49.361	-29.685	83.689
16.8	-26.873	-174.216	-140.108	50.219	49.446	-93.174	43.761	-30.076	70.425
16.933	38.655	-206.329	-82.089	38.12	37.004	-53.288	35.355	2.243	6.539
17.067	53.279	-152.878	-42.195	36.629	30.1	-34.202	52.997	-59.346	7.077
17.2	127.989	-133.046	-109.101	70.776	8.893	-54.802	18.742	13.769	32.714
17.333	39.536	-163.262	-81.496	20.07	-23.107	-23.787	46.916	-12.768	-93.565
17.467	4.532	-35.107	-107.584	21.665	8.485	9.08	42.83	-19.85	154.549
17.6	68.542	-27.625	-90.883	-9.142	-27.695	-76.374	34.327	2.738	37.81
17.733	34.226	10.444	-94.11	-7.003	17.363	-9.329	53.573	-26.833	-68.144
17.867	21.091	-7.941	-69.329	4.631	-18.927	-83.45	33.45	-63.109	35.452
18	68.629	-13.177	-33.542	10.016	-9.802	-74.583	16.902	-20.448	167.005
18.133	35.557	-21.726	-47.039	14.702	118.812	-42.682	22.714	-142.253	-68.081
18.267	40.285	-77.992	-16.967	40.594	14.807	-67.142	-118.449	89.557	36.228
18.4	-4.421	-101.309	-11.676	42.114	58.321	-32.743	7.125	16.83	116.161
18.533	-4.413	-210.699	-58.23	76.969	14.183	-27.069	109.383	-91.348	54.148
18.667	47.593	-60.704	-38.221	61.071	-54.493	-19.999	-108.8	105.386	42.13
18.8	53.346	-93.958	-80.037	22.342	-4.799	-61.817	118.352	21.475	44.477
18.933	-12.287	-36.661	-80.714	36.696	13.976	-56.099	-8.734	25.15	18.226
19.067	-25.855	-22.403	-43.176	19.533	111.385	-7.461	-1.681	-8.393	115.509
19.2	-21.831	-16.58	-89.881	27.711	-93.335	-22.745	-18.499	-27.159	62.843
19.333	-23.295	36.511	-36.142	53.969	-2.044	-25.974	-113.985	10.569	13.193
19.467	40.014	77.963	-83.678	51.203	128.973	-18.667	-3.099	-28.705	98.302
19.6	162.711	36.443	-69.241	-8.403	-35.672	10.918	-3.913	-9.86	39.054
19.733	54.881	44.953	-50.468	-7.826	-45.92	-13.812	154.471	65.779	65.161
19.867	116.372	28.892	-104.923	44.107	-13.557	-30.004	-4.177	6.257	30.85
20	37.223	20.244	-82.33	32.951	-5.587	20.052	-16.675	-6.054	52.666
20.133	28.43	47.743	17.307	20.661	57.303	1.986	-63.912	41.869	79.706
20.267	-17.59	59.143	-35.129	91.655	34.411	14.156	-97.722	-60.059	3.14
20.4	-7.42	99.325	-17.216	38.095	-86.648	-38.916	-108.203	106.579	19.937
20.533	-61.426	90.65	-25.596	77.884	164.679	17.302	-253.586	-75.536	47.318
20.667	-40.799	206.348	-19.227	32.285	-64.172	28.472	-175.587	47.741	10.889
20.8	-45.429	177.738	-47.051	23.295	10.006	-3.116	-40.286	60.53	42.026
20.933	-56.425	94.369	-50.343	47.414	14.73	-37.596	-136.479	58.126	48.767
21.067	-49.271	88.04	-21.424	16.601	45.914	-47.338	-174.48	14.221	11.642
21.2	-21.999	85.512	-34.037	11.363	-8.751	-7.955	115.882	35.598	55.37
21.333	-34.551	55.126	12.987	34.93	-7.522	32.256	132.313	49.736	-124.554
21.467	-30.233	19.66	-52.763	71.689	4.608	30.154	-156.112	44.435	177.312
21.6	31.266	41.587	-13.823	45.519	-2.875	14.268	-9.769	141.012	95.19
21.733	14.425	23.582	-44.173	36.787	16.501	-11.679	40.388	5.002	112.487
21.867	71.501	40.542	9.49	11.638	134.137	5.638	43.618	-99.287	95.697
22	-11.632	109.124	-18.028	76.261	12.546	-12.929	-11.33	51.854	78.049
22.133	3.085	69.862	34.799	33.793	16.317	13.823	21.564	14.204	86.498
22.267	174.881	33.444	12.732	28.611	20.519	-8.954	-4.055	36.312	81.138
22.4	112.622	89.037	3.974	23.87	23.248	6.259	13.105	194.573	26.503
22.533	12.381	51.544	-9.753	31.992	11.308	-10.027	-6.302	66.266	12.722
22.667	-54.41	-11.191	-20.671	1.82	-69.688	-22.039	37.89	21.456	9.747
22.8	108.385	10.662	-7.419	51.849	31.494	-51.723	-81.55	-56.371	30.333
22.933	-61.058	34.756	0.43	46.282	45.836	-57.802	-105.545	26.958	-25.866
23.067	74.866	38.053	-22.716	30.612	32.041	-18.373	-169.63	24.729	42.621
23.2	102.228	107.792	32.981	17.592	62.765	-3.06	-181.692	2.735	9.634
23.333	15.25	88.182	4.195	34.575	8.437	-8.54	-201.276	-13.614	-2.888
23.467	5.703	11.71	11.356	-3.497	45.395	9.072	-173.186	19.453	9.53
23.6	-76.349	-10.511	-3.209	47.944	129.995	12.439	-207.382	23.9	-4.968
23.733	-239.314	-12.87	14.115	40.328	-125.175	-37.442	-133.289	11.926	6.436
23.867	-238.753	80.442	14.385	13.838	128.317	10.18	-210.818	13.991	-4.723
24	-174.871	160.885	3.948	-98.454	20.908	134.64	-266.636	98.129	-124.498
24.133	-163.395	-16.274	-0.672	123.491	-9.869	192.192	-167.1	24.381	109.542
24.267	-201.026	-26.36	9.104	45.931	-87.396	165.182	-119.264	-83.915	7.345
24.4	-261.477	82.243	-12.299	4.07	108.014	114.88	-67.277	34.955	8.19
24.533	-235.967	67.418	14.676	54.112	-96.726	137.867	-55.083	-8.372	-20.745
24.667	-274.664	-137.605	-15.345	56.575	15.25	114.065	-51.032	26.99	-12.915
24.8	-237.191	89.389	4.185	61.33	-11.357	122.97	-11.988	5.35	-31.756
24.933	-101.978	78.529	24.032	-40.056	11.915	110.151	-103.642	36.718	1.931
25.067	-55.973	35.794	-9.254	43.22	39.087	174.763	26.474	-8.919	-25.931
25.2	-6.514	30.673	11.295	108.305	38.737	107.867	28.161	132.112	-18.234
25.333	-16.192	53.039	24.154	108.424	6.716	91.487	136.687	35.152	-123.801
25.467	-44.137	-27.309	-15.462	51.747	16.249	80.888	-62.299	-90.898	69.696
25.6	-112.976	19.274	-23.006	53.629	124.741	55.608	1.191	-9.727	8.989
25.733	-217.028	116.856	11.31	206.508	30.566	28.855	22.206	9.811	-12.025
25.867	-138.98	5.824	-49.371	-70.198	-12.623	19.046	67.963	-10.216	31.654
26	-147.85	-43.832	-46.585	243.195	13.855	23.521	-8.162	1.486	24.161
26.133	-122.261	46.508	-62.357	102.391	-11.981	-65.463	72.392	18.241	-28.785
26.267	-93.029	12.089	-61.76	67.389	-16.075	-117.585	48.806	4.237	38.688
26.4	-70.831	-21.968	-89.367	58.028	-74.008	82.003	16.723	52.95	7.868
26.533	-180.24	-11.426	-47.187	83.571	6.651	-24.44	1.254	59.024	34.078
26.667	-114.127	-52.164	-88.435	19.207	22.169	-259.077	-13.618	-24.504	-128.919
26.8	-138.284	34.506	-69.829	23.98	2.544	135.672	-12.595	-184.539	118.56
26.933	-120.375	-28.073	-35.611	72.276	-3.385	-9.107	16.99	28.996	-16.949
27.067	-116.024	-84.781	-51.177	29.143	28.24	33.63	8.591	26.544	-9.289
27.2	-117.627	-13.033	-77.814	23.595	23.976	48.45	36.513	20.215	-16.659
27.333	-15.713	10.165	-127.112	27.158	-2.9	41.13	35.107	12.694	-1.729
27.467	15.762	-6.031	-31.038	66.504	-2.542	-30.703	66.655	30.974	-1.702
27.6	-165.855	33.693	-13.757	24.429	-6.247	-19.545	33.364	-101.176	11.888
27.733	34.319	51.4	-40.67	20.274	126.969	-5.309	24.199	-4.007	-3.907
27.867	-74.624	139.499	55.432	3.072	4.243	-132.943	59.547	22.242	3.996
28	-49.99	130.246	-86.969	-3.207	15.17	21.333	131.025	17.092	11.016
28.133	-48.046	30.733	-125.644	0.729	-83.917	-78.383	59.553	4.493	-17.049
28.267	229.903	18.837	-53.701	12.489	-397.097	-10.06	24.45	-1.184	10.243
28.4	15.649	4.31	62.657	22.671	-123.357	-61.234	66.627	11.475	-10.801
28.533	-149.777	5	-77.822	9.554	1.167	-24.809	49.17	138.853	-27.639
28.667	15.271	-10.896	-161.872	3.007	6.839	-51.383	24.248	83.009	-23.098
28.8	-2.522	13.106	31.103	-4.77	18.554	-19.879	1.67	103.182	-11.003
28.933	-83.488	-20.55	-115.534	11.077	54.514	9.747	10.566	95.234	-37.367
29.067	-209.211	15.062	-38.689	-10.004	62.561	-0.552	30.143	61.916	12.948
29.2	-394.557	14.86	14.983	-0.724	10.071	-9.552	8.174	62.963	-7.277
29.333	-73.153	-10.383	-19.716	22.304	173.215	30.396	-31.559	15.047	-4.544
29.467	-126.247	-16.34	3.852	-8.662	21.908	59.106	22.053	6.293	-11.662
29.6	-128.233	-34.449	-12.376	-33.451	33.696	-46.293	-18.467	54.127	11.091
29.733	-106.117	-26.928	4.178	15.369	18.925	-7.437	11.925	-5.788	15.237
29.867	-165.276	-9.203	-60.585	11.329	9.826	-15.009	-17.346	-11.912	-2.809
30	-218.656	25.785	-28.051	16.041	31.609	-34.905	3.89	-15.43	-26.02
30.133	-190.886	-24.326	-41.209	23.377	-80.246	-62.542	-2.545	20.271	-21.544
30.267	-105.272	27.406	-49.009	52.247	12.149	-11.625	-37.218	21.235	13.06
30.4	-37.144	70.385	-5.058	7.107	22.163	-12.514	-14.8	4.159	-9.875
30.533	152.014	8.181	-30.486	25.602	130.6	5.583	4.127	27.57	9.851
30.667	18.261	11.941	21.519	13.6	40.186	5.247	-230.372	20.939	-11.494
30.8	-16.829	-13.066	-11.981	12.233	10.059	5.74	-124.875	2.686	-6.026
30.933	3.239	58.759	19.257	0.642	12.753	37.707	-60.904	-3.431	-60.285
31.067	-27.934	141.518	84.502	4.281	18.742	95.023	-29.108	-19.029	-83.291
31.2	-2.978	171.742	129.692	-3.298	2.356	184.143	-30.909	26.979	-123.776
31.333	46.251	-73.457	323.346	2.674	1.957	190.821	-22.463	-41.069	-72.559
31.467	0.488	26.751	111.637	-2.985	-1.992	62.736	-9.486	105.312	-111.074
31.6	35.595	110.221	99.119	-16.063	14.173	190.071	-42.29	74.802	-74.273
31.733	42.785	173.911	54.823	-47.6	-0.192	72.476	-20.584	59.147	-72.867
31.867	72.312	28.646	36.458	-4.332	15.438	95.438	-20.698	91.088	11.835
32	40.413	21.883	37.705	33.627	4.215	134.483	7.662	55.113	-43.372
32.133	66.33	49.758	133.539	-44.994	5.491	107.793	25.894	-6.464	-29.865
32.267	47.441	-10.66	22.601	22.007	-5.307	240.747	6.242	7.587	45.799
32.4	124.295	21.704	42.91	-38.364	-2.319	46.378	38.938	22.976	26.535
32.533	97.159	1.803	36.885	1.633	16.407	147.025	82.409	4.341	-17.429
32.667	16.574	-22.572	-5.461	-122.95	6.469	139.298	60.363	-7.51	29.732
32.8	65.785	-5.139	18.225	-139.442	-8.625	99.641	11.987	-22.867	1.762
32.933	112.75	-16.933	-7.96	-204.112	10	82.089	5.308	-46.82	7.728
33.067	44.566	-31.102	11.675	-204.307	0.929	41.806	45.003	-90.5	13.435
33.2	92.888	63.136	-19.774	-192.623	-7.159	48.689	-18.561	-54.97	5.308
33.333	87.9	-13.044	-52.095	-211.495	-4.899	6.961	-18.225	-19.022	64.247
33.467	68.231	9.722	-16.149	-222.212	0.421	13.569	35.337	-10.175	8.158
33.6	41.759	-11.152	-21.454	-340.101	4.609	-37.974	-6.757	50.867	-12.07
33.733	56.926	-1.29	-3.441	-205.647	22.407	-60.051	-21.041	38.423	22.538
33.867	13.467	-8.496	-19.257	-106.18	4.494	-59.561	-6.238	84.745	43.367
34	61.673	-13.011	-23.074	-62.507	-18.534	-50.631	-7.487	153.565	16.051
34.133	43.154	35.666	-59.838	-53.335	25.947	-66.464	26.292	-9.062	-7.231
34.267	296.737	-14.092	-32.431	-53.225	2.199	-42.838	7.007	-329.075	-11.188
34.4	132.409	8.027	-28.166	143.538	-125.676	-94.149	-19.816	-134.398	16.309
34.533	67.126	-5.424	-8.863	-93.359	1.417	-64.601	-58.95	-44.456	24.02
34.667	73.934	13.101	-3.938	174.208	151.473	-66.16	-11.245	14.026	38.737
34.8	78.636	-4.352	1.546	74.15	-25.632	-10.904	7.227	-20.864	-14.668
34.933	-70.294	2.254	-8.791	92.478	8.87	-67.739	4.503	11.299	6.012
35.067	-271.955	15.702	-51.395	21.806	26.466	-25.533	-26.426	5.272	-24.334
35.2	-244.691	24.769	7.244	11.948	-8.566	-6.394	-29.114	34.326	27.814
35.333	-106.233	-50.354	14.704	141.7	-14.539	-49.152	196.067	44.538	5.766
35.467	-211.324	-136.077	7.415	9.355	6.069	-82.665	-6.497	99.068	41.05
35.6	-275.201	-47.509	46.586	-14.528	-2.234	-35.905	7.994	74.398	62.039
35.733	-242.842	-164.663	91.607	-26.204	-13.718	-33.214	-96.833	97.322	48.706
35.867	-160.515	-231.236	36.844	-9.909	-5.18	-40.861	34.814	78.818	41.884
36	-211.065	-130.546	-15.912	6.064	-11.684	-49.694	23.061	9.943	59.402
36.133	-395.781	-135.96	18.909	14.294	-0.825	-40.835	90.138	29.765	4.673
36.267	-121.04	-149.671	10.465	106.494	-0.841	1.625	138.912	4.564	9.915
36.4	-262.67	-88.742	98.528	120.823	-22.864	-21.567	119.056	20.742	36.341
36.533	-126.63	-95.387	120.436	28.517	-20.502	-23.04	-19.901	84.078	22.459
36.667	-64.814	-84.299	6.605	25.194	-6.182	-27.616	61.865	112.396	8.729
36.8	-220.543	-43.482	48.773	5.602	32.871	-35.408	28.029	84.369	49.562
36.933	-16.334	76.538	-73.613	-28.614	-36.219	-65.097	52.114	74.125	42.143
37.067	-112.17	-36.393	-40.284	-62.738	14.942	-57.388	47.196	81.225	11.546
37.2	-188.28	-63.376	-37.679	-70.589	126.438	-42.891	54.287	74.091	39.896
37.333	45.436	-20.688	87.083	-163.313	-3.862	-11.381	108.746	73.434	16.604
37.467	-38.18	25.531	-27.537	-160.858	16.733	-45.673	67.848	44.793	-9.77
37.6	-14.904	82.68	4.069	-186.559	-7.159	-90.932	71.748	84.229	-5.843
37.733	-48.721	172.392	6.374	-190.797	10.997	-5.726	20.722	-0.687	26.42
37.867	0.702	85.94	4.904	-211.985	2.626	-41.601	34.533	62.499	25.189
38	18.356	51.749	-87.206	-201.692	-22.399	-47.102	27.425	59.334	3.397
38.133	130.501	73.968	-122.126	-154.143	-130.309	-6.584	104.289	-49.466	10.924
38.267	185.989	43.717	-90.769	-136.263	80.913	-15.39	51.704	98.719	-28.166
38.4	107.411	65.744	-103.397	-132.715	-20.512	-19.198	19.481	120.328	2.399
38.533	43.046	23.241	-64.918	-91.973	-27.175	-46.984	-29.803	35.5	11.993
38.667	43.932	-96.149	-76.235	-101.667	-21.294	-74.455	-10.828	37.21	-7.195
38.8	66.413	-35.794	-74.004	-39.961	-19.648	-47.026	-42.209	27.101	21.269
38.933	103.58	-44.246	-59.505	15.168	-6.417	-79.911	-44.259	12.323	55.346
39.067	53.034	-34.263	-58.711	15.548	17.786	-105.429	90.935	30.436	26.257
39.2	116.544	46.331	-126.044	-9.767	62.481	-65.462	34.96	29.538	40.908
39.333	143.341	106.072	-24.632	-18.386	80.022	-57.004	26.879	19.258	11.059
39.467	126.638	123.556	-19.355	-142.407	18.767	-71.315	39.178	33.533	42.289
39.6	153.49	44.438	-19.263	-154.96	3.688	-121.948	17.335	-62.649	56.3
39.733	90.406	13.845	-119.497	-67.056	8.225	-70.772	109.583	152.238	17.966
39.867	199.466	31.172	-35.23	5.217	-0.812	-68.195	20.093	55.725	-55.892
40	-17.709	21.109	142.213	13.307	4.142	-67.81	6.134	61.787	127.029
40.133	67.765	5.814	-10.091	45.577	-99.657	-95.815	4.949	50.979	21.42
40.267	132.838	-6.096	-5.636	-45.761	-2.226	-90.737	15.191	22.743	-2.191
40.4	29.796	3.671	-6.442	49.654	104.783	-145.594	-43.307	78.139	4.213
40.533	56.262	-30.019	-59.502	15.32	2.213	-96.466	19.226	-3.148	1.537
40.667	32.446	-12.885	-66.725	40.294	13.508	-125.305	2.839	-9.112	7.079
40.8	12.629	-22.213	-85.657	25.637	-2.917	-95.205	26.781	26.964	-10.049
40.933	38.102	-88.91	-41.536	79.364	-12.914	-99.433	15.482	-4.432	40.318
41.067	48.402	-185.773	-39.505	22.574	-11.324	-117.123	47.052	7.662	7.851
41.2	10.163	-77.164	-38.763	30.706	-41.454	-111.631	43.36	9.36	47.598
41.333	152.805	-140.691	-51.85	9.185	-55.838	-50.271	4.636	19.588	37.637
41.467	-60.307	-143.311	-72.579	17.04	-124.938	-96.305	19.208	-16.621	68.349
41.6	15.626	-132.113	-14.937	45.016	-114.386	-48.047	71.137	24.184	8.95
41.733	-29.156	-109.573	-20.74	94.127	-161.542	-80.688	-50.448	24.324	54.18
41.867	-16.93	-104.532	42.758	25.985	-248.627	-58.295	61.416	21.455	-100.265
42	117.966	-137.427	23.614	3.513	-60.868	-115.707	-10.301	5.486	115.848
42.133	-15.865	-61.234	70.159	23.674	-81.704	-88.403	83.207	10.093	18.409
42.267	-16.559	-73.98	-21.651	-5.153	-69.685	-95.523	-3.332	13.589	-74.249
42.4	120.022	-63.105	48.566	-16.279	-83.382	-60.305	128.338	5.776	20.601
42.533	111.71	-188.002	19.893	15.974	-29.247	-45.797	9.451	18.373	41.742
42.667	125.275	-22.72	46.448	50.102	-53.471	-74.352	-123.984	59.743	52.252
42.8	107.909	-55.29	12.835	71.402	-7.603	-66.119	4.247	38.15	23.384
42.933	39.36	77.077	20.909	50.275	-46.776	11.897	19.279	-32.911	85.093
43.067	62.664	160.209	35.293	103.021	-18.623	-17.567	147.076	41.358	154.388
43.2	504.085	75.55	30.311	34.399	-59.856	-48.613	23.172	-4.021	-31.603
43.333	135.422	85.791	15.483	17.593	-91.879	-16.183	-122.294	-4.678	68.077
43.467	145.268	70.484	12.789	10.859	-187.749	-30.548	-10.837	16.133	30.126
43.6	76.827	19.705	11.789	1.359	-57.855	-12.78	29.165	62.231	2.607
43.733	66.502	45.794	3.66	-15.252	-15.509	-10.209	133.604	1.892	-15.887
43.867	60.489	55.047	54.042	6.312	-56.739	-77.03	89.297	-5.816	-5.195
44	-144.854	139.76	46.337	-22.603	-23.091	-97.141	26.868	44.345	-88.004
44.133	224.056	-47.426	47.9	12.747	83.968	-55.761	20.768	9.458	5.386
44.267	60.482	77.423	50.561	-5.78	7.809	-28.325	49.046	-32.367	-15.625
44.4	40.672	69.368	19.57	21.675	3.9	-54.557	61.605	-32.118	142.311
44.533	44.981	20.95	60.903	-27.861	13.989	-33.114	39.923	-1.195	0.621
44.667	33.517	41.023	30.289	-33.38	12.658	-31.191	28.683	6.226	-25.782
44.8	26.327	61.615	39.834	-22.699	24.19	-43.169	46.035	-3.466	34.679
44.933	37.794	102.255	65.364	-35.235	54.421	-13.132	39.388	39.248	17.588
45.067	-2.407	45.426	52.91	9.051	12.159	-29.947	62.513	13.591	28.95
45.2	-2.832	65.509	35.038	23.686	6.087	18.962	44.911	4.909	-16.339
45.333	-17.694	87.915	48.904	50.712	37.956	-20.104	38.731	-9.621	-10.283
45.467	3.409	52.993	40.855	4.609	18.389	-28.157	34.854	-11.996	5.226
45.6	55.001	-4.668	10.397	-30.841	-81.795	3.622	66.739	-9.154	26.715
45.733	-5.811	60.074	22.869	8.134	-4.756	-5.77	39.463	12.193	6.698
45.867	101.634	-9.887	3.682	20.043	5.145	-13.159	41.993	-3.843	6.025
46	105.129	15.622	12.927	29.442	-29.543	-10.555	66.835	-44.374	-2.697
46.133	55.105	52.297	-20.333	120.127	-1.912	-11.911	34.571	-69.19	-27.626
46.267	154.7	53.496	-19.309	128.915	85.555	9.038	15.013	10.957	20.942
46.4	36.335	-13.406	21.571	54.061	-17.273	4.838	34.975	19.523	4.496
46.533	83.715	24.71	-0.909	-2.84	31.89	11.164	70.327	15.363	-7.783
46.667	-144.3	133.981	3.329	-3.261	8.07	-12.817	44.224	2.064	-19.746
46.8	282.606	106.191	36.846	-13.773	5.396	-20.762	18.123	-10.097	4.05
46.933	25.568	127.632	25.967	21.886	41.177	27.649	-1.926	-18.987	26.989
47.067	18.683	-69.085	57.494	-7.031	6.233	6.566	39.633	-7.922	-5.046
47.2	91.291	42.076	34.956	-22.093	53.206	50.283	32.502	12.551	-7.023
47.333	14.276	6.079	6.091	37.568	116.83	78.134	44.316	3.407	-12.522
47.467	24.545	22.067	35.305	-10.005	30.02	68.344	19.072	2.679	0.486
47.6	27.984	0.454	12.067	28.386	13.754	123.061	4.672	-3.924	11.827
47.733	71.477	-59.694	18.113	-27.376	42.252	154.071	-3.246	3.47	21.948
47.867	-18.39	-68.144	13.055	20.516	16.051	205.433	-2.278	23.746	9.985
48	-144.301	132.673	-0.935	29.873	31.059	163.612	45.914	-14.355	11.398
48.133	169.111	-140.678	8.77	-6.324	-36.877	168.444	3.5	-5.161	13.656
48.267	36.704	77.211	2.522	10.665	-44.655	204.463	2.887	-1.736	12.049
48.4	-15.118	9.698	-3.21	6.918	-34.734	176.673	32.248	9.715	9.558
48.533	68.405	3.052	-1.094	-17.086	15.261	145.561	61.193	-9.975	-9.929
48.667	17.961	7.533	4.03	-17.193	57.515	117.874	45.524	-11.261	-3.08
48.8	55.714	22.457	-5.548	7.225	20.474	60.382	-5.171	-13.525	-5.664
48.933	6.873	88.556	-2.559	3.274	60.504	24.8	5.142	16.288	25.692
49.067	75.502	-19.153	-1.223	-29.077	51.238	0.171	62.735	4.576	-27.879
49.2	32.083	17.69	-11.41	-8.653	83.957	-6.892	22.823	-6.694	12.831
49.333	-3.218	139.148	24.168	-43.203	30.368	-17.373	-17.274	17.287	23.052
49.467	110.665	-78.477	-7.558	-25.414	31.916	-19.24	7.935	15.286	-3.281
49.6	13.536	95.435	-25.081	-43.039	-9.491	-36.11	57.785	-20.907	-2.392
49.733	41.08	43.21	38.164	-48.788	19.212	-48.392	29.235	1.171	-4.357
49.867	33.92	-16.257	-0.677	7.798	-23.09	-54.934	-40.783	-50.308	1.156
50	142.171	8.535	10.715	5.741	-39.798	-91.462	5.376	-97.254	-13.585
50.133	91.58	5.68	8.333	2.639	-7.273	-128.464	12.303	-119.372	1.531
50.267	45.182	110.313	-23.43	-27.83	-19.306	-86.764	-9.044	-77.249	-18.374
50.4	97.462	51.191	8.49	8.022	-18.148	-51.414	-39.512	-113.635	-15.544
50.533	82.352	113.301	4.182	20.165	9.144	-40.301	33.034	-80.29	4.183
50.667	-7.756	138.928	20.497	8.811	32.214	-60.878	-9.312	-97.171	6.984
50.8	55.464	-109.531	15.496	3.541	22.774	-25.561	8.468	-73.875	-1.812
50.933	7.17	-5.804	4.087	-9.885	92.678	-62.064	7.216	-61.348	-18.094
51.067	78.427	-32.399	42.77	16.05	104.088	-41.214	-6.506	-73.027	0.926
51.2	54.184	-27.944	10.632	20.106	-5.61	-55.717	-12.27	-61.405	0.931
51.333	63.831	-23.043	11.969	6.737	26.143	-9.885	-163.179	-110.826	-41.099
51.467	53.435	64.271	17.654	-6.549	11.7	6.821	-124.968	-45.305	-107.666
51.6	18.876	23.32	14.134	9.123	-7.571	-14.903	-134.437	-28.342	-92.351
51.733	61.951	-27.362	1.252	-6.766	24.417	26.593	-119.28	-25.013	-79.098
51.867	70.139	24.483	13.8	11.474	13.193	-24.759	-122.496	0.656	-75.745
52	-145.41	138.346	8.25	-15.441	-117.253	-62.418	-94.739	5.142	-112.246
52.133	247.028	-135.755	39.012	5.747	76.274	-65.833	-93.552	67.685	-118.928
52.267	6.718	-59.978	26.365	16.913	-69.621	-21.712	-125.052	63.058	-99.777
52.4	62.867	-39.805	10.73	-4.272	-67.056	-27.798	-169.099	46.054	-63.881
52.533	52.47	-36.32	-16.868	-13.595	-8.688	-63.111	-194.199	38.796	-100.801
52.667	75.577	12.407	42.868	6.543	-48.473	-64.456	-64.34	95.471	-19.286
52.8	140.422	29.502	10.791	-14.966	-89.341	-19.489	-15.371	37.321	-34.497
52.933	25.559	110.662	-7.316	-33.482	-6.117	-44.944	-39.06	30.922	-61.51
53.067	118.186	31.256	3.547	-43.007	13.38	-10.614	40.679	65.844	-61.536
53.2	148.52	-18.991	22.973	-109.309	118.324	-2.076	10.02	99.986	-90.04
53.333	145.28	275.08	15.488	-119.253	24.225	12.499	-48.528	67.679	-63.594
53.467	164.883	-247.088	16.322	-228.82	37.071	-26.244	-65.206	52.619	-50.752
53.6	109.857	-22.124	3.307	-238.422	48.174	41.849	-53.987	79.903	-35.334
53.733	100.023	25.283	28.266	-185.668	103.317	10.373	-13.787	69.145	5.448
53.867	94.416	25.633	1.663	-224.184	33.32	27.698	-20.261	77.244	-35.397
54	105.086	-1.291	33.432	-203.984	6.832	16.231	104.559	75.407	13.86
54.133	68.059	45.696	8.315	-125.712	-123.68	28.45	34.249	46.52	-53.158
54.267	102.812	9.857	15.911	-86.85	8.862	-3.486	3.829	43.214	2.735
54.4	54.365	-16.435	7.791	-124.556	15.62	20.269	6.234	34.442	31.535
54.533	70.556	-48.777	20.646	-97.974	-6.951	24.192	28.392	14.672	11.8
54.667	71.451	-7.607	-9.256	-111.326	-7.508	102.575	36.892	-31.866	14.133
54.8	80.016	-62.667	14.352	-109.363	-13.36	236.624	17.502	36.209	50.083
54.933	34.012	-13.355	11.072	-152.683	33.28	270.307	21.605	18.128	41.584
55.067	68.635	-35.93	2.835	-162.117	52.597	304.609	-19.362	-2.678	48.555
55.2	18.849	-21.253	14.947	-214.93	49.79	311.066	-26.821	24.872	15.199
55.333	30.865	4.92	29.546	-96.982	65.834	204.479	-84.521	-0.183	12.988
55.467	44.105	539.259	7.58	-133.437	60.994	127.196	11.863	15.139	54.278
55.6	44.968	-288.288	30.135	-119.833	31.65	96.938	9.423	5.132	5.881
55.733	22.265	33.357	14.3	-82.564	14.212	149.826	11.253	-14.255	13.313
55.867	5.294	63.296	22.043	-44.666	5.261	139.295	44.363	0.527	-8.805
56	-16.214	4.568	4.918	-34.466	-35.43	32.286	43.044	-19.736	22.541
56.133	-24.264	95.083	-12.678	-48.746	-22.768	135.667	102.924	3.369	18.142
56.267	27.277	28.561	-2.537	-47.897	3.919	165.718	52.081	3.823	-24.75
56.4	-50.777	60.922	2.277	-52.706	66.987	135.29	63.287	-2.972	12.382
56.533	153.446	42.538	-17.605	-9.292	-114.979	110.123	49.234	-5.485	-15.721
56.667	172.206	3.557	49.584	8.266	-114.191	60.578	79.146	20.672	15.07
56.8	75.109	-15.746	-90.863	16.777	-132.757	97.774	3.536	-19.716	77.848
56.933	27.609	313.235	37.781	-28.072	-112.377	52.648	58.766	6.785	37.964
57.067	14.066	-15.881	137.661	22.843	-115.863	46.393	18.974	-74.573	-4.292
57.2	12.253	-210.567	-67.505	32.425	-99.59	23.89	93.573	-408.685	72.104
57.333	-65.092	-7.837	18.614	-36.434	-174.962	-16.296	48.629	-189.611	18.103
57.467	122.009	231.623	32.005	-5.873	-14.784	-22.245	62.558	-62.481	-7.695
57.6	23.164	-205.237	15.164	42.321	-70.043	-13.598	34.121	-69.369	76.054
57.733	-11.605	214.646	33.078	10.163	-169.845	-18.531	31.02	-53.753	43.655
57.867	29.079	-269.131	8.944	-17.564	50.499	-39.941	13.055	-17.888	84.231
58	-22.692	61.596	19.783	-46.921	-50.915	-29.755	24.77	12.544	33.442
58.133	19.067	-28.521	1.58	13.046	-66.14	7.013	77.523	-11.72	77.23
58.267	-96.776	34.821	1.035	14.711	-74.325	-38.61	15.565	49.59	93.551
58.4	112.88	45.096	10.606	21.808	-16.875	-67.217	19.072	111.45	-31.429
58.533	-139.282	-2.227	21.113	8.573	-51.44	-81.384	57.922	129.079	34.635
58.667	-493.701	-4.874	-16.453	68.778	-131.477	-55.934	-23.647	131.492	18.661
58.8	-123.029	35.838	4.731	87.184	-3.424	-38.098	-19.236	90.421	126.712
58.933	-142.494	37.958	15.165	26.65	-3.724	-18.662	3.397	69.899	-49.961
59.067	-109.193	18.869	130.535	13.873	-18.735	-1.224	21.858	111.279	118.301
59.2	-192.97	49.278	-11.854	59.838	10.515	-97.878	27.376	100.558	36.063
59.333	-208.966	-9.336	11.662	17.46	4.538	-60.965	-12.228	79.316	13.422
59.467	-173.394	18.234	0.363	15.294	32.435	-79.182	-32.579	90.654	-66.081
59.6	-207.415	11.751	-8.254	94.125	33.915	-59.28	70.43	55.373	39.283
59.733	-230.178	6.139	2.548	47.195	22.892	-38.573	70.363	85.401	24.439
59.867	-225.037	34.756	-10.311	56.286	95.785	-34.629	39.849	36.996	40.398
60	-193.439	-12.695	12.001	78.06	-44.236	-46.219	89.962	55.663	154.356
60.133	-169.302	-7.198	18.189	84.161	83.116	-75.087	62.139	42.115	26.831
60.267	-129.249	62.944	20.51	29.708	-81.274	-86.448	51.621	1.126	7.91
60.4	-173.968	-106.815	-20.605	15.639	145.695	-36.426	41.508	45.473	3.176
60.533	-103.658	-21.192	-13.031	-8.798	16.732	-112.135	44.284	17.034	-2.599
60.667	-118.037	47.626	26.445	32.836	-19.112	-58.81	24.505	-19.095	16.456
60.8	-116.191	68.505	-19.057	36.462	22.683	-38.784	57.905	18.413	-6.728
60.933	-98.068	140.711	-14.609	85.467	-11.445	-60.538	47.474	-2.575	22.222
61.067	-262.746	159.278	7.843	73.42	-14.271	-9.161	2.843	11.204	21.426
61.2	-215.466	61.295	-14.734	56.538	-6.688	-20.718	14.039	3.305	-14.52
61.333	-193.475	44.513	33.903	22.932	-107.699	-8.364	5.42	-3.625	7.047
61.467	-204.212	44.214	18.88	65.142	71.122	11.481	4.971	22.64	-9.712
61.6	-236.129	7.002	-32.734	50.432	17.06	-17.809	-32.127	9.171	-1.234
61.733	-247.569	19.169	3.084	41.652	33.071	-30.105	13.45	-4.896	-11.572
61.867	-173.547	19.34	6.467	78.419	-4.529	-5.913	55.412	-0.449	7.061
62	-146.801	49.3	-107.285	98.79	12.173	-25.243	39.803	-7.016	10.572
62.133	-156.195	27.051	-2.397	51.517	13.701	-69.417	45.437	-29.994	8.865
62.267	-177.779	20.866	-12.853	53.885	-31.474	-91.746	26.493	-20.121	-13.344
62.4	-219.238	8.389	11.883	51.551	3.245	-65.919	10.842	-12.405	-27.447
62.533	-193.2	-44.923	33.494	63.017	1.752	-35.504	11.67	-28.409	19.377
62.667	-89.788	10.433	5.734	57.513	65.93	-37.834	-39.293	9.542	16.521
62.8	-82.704	54.013	8.668	38.626	29.45	-6.918	36.996	-14.761	-10.802
62.933	-161.205	21.372	140.35	58.414	44.954	24.872	-13.663	-1.684	9.483
63.067	-45.693	-45.568	4.167	5.748	41.389	-19.005	-1.928	-27.034	-53.025
63.2	17.826	3.814	5.644	5.055	36.895	-59.018	-16.144	-26.28	28.914
63.333	19.945	55.926	-4.078	22.743	19.136	-13.949	7.308	-7.685	19.316
63.467	71.763	9.853	-1.473	36.834	29.509	-26.028	13.371	-17.987	1.984
63.6	97.006	-10.352	-12.201	91.147	33.487	-10.736	-20.967	-12.07	145.024
63.733	17.393	14.228	-5.793	11.595	18.418	-17.602	12.222	-14.042	48.282
63.867	26.27	19.541	19.096	70.088	51.606	19.563	-4.57	-22.902	5.977
64	26.129	17.059	21.089	32.25	3.336	-15.643	56.664	-15.706	33.488
64.133	26.57	-2.86	15.677	-9.98	11.941	12.901	-7.181	-23.82	53.415
64.267	57.076	28.678	15.692	20.52	144.709	-104.991	13.883	-20.348	28.879
64.4	32.979	9.432	7.128	19.137	271.066	-47.976	13.242	-10.233	-5.786
64.533	12.788	-112.288	7.351	13.547	200.229	-79.674	42.464	-15.884	5.831
64.667	35.885	-132.33	5.058	-9.862	223.252	-76.756	33.521	-18.785	15.288
64.8	60.472	-174.969	-16.257	11.378	187.33	-76.533	46.323	9.356	19.046
64.933	34.085	-217.603	-104.765	-80.737	250.058	-17.751	15.178	-20.527	-24.756
65.067	150.48	-187.31	-7.395	197.636	183.604	13.553	83.252	-1.294	-55.672
65.2	-16.267	-201.035	-22.737	38.624	157.293	34.306	68.409	-29.893	31.665
65.333	-9.123	-139.223	138.54	81.273	75.599	1.7	318.181	-17.531	22.279
65.467	-89.173	-83.421	-19.084	67.966	-16.674	-9.998	15.891	-36.834	59.052
65.6	117.723	-71.864	-132.729	123.319	21.193	-81.418	-2.631	-15.818	18.362
65.733	-18.32	-55.327	144.535	38.34	75.02	-59.284	-16.701	-121.729	139.177
65.867	-25.918	-25.016	25.747	-4.683	59.57	-29.125	-4.023	-80.978	52.876
66	-103.341	99.05	41.368	44.718	59.46	-67.182	-19.878	-42.356	36.636
66.133	119.97	155.776	8.181	-135.605	113.97	-38.756	2.027	-50.044	18.828
66.267	1.161	48.653	-17.162	57.521	44.533	-29.662	11.911	-30.782	93.631
66.4	4.296	36.758	6.624	57.21	79.533	-21.265	18.424	-44.719	16.886
66.533	-20.247	21.202	26.874	53.379	91.435	-17.404	12.113	-46.138	31.725
66.667	-18.484	47.075	13.116	35.429	84.231	5.617	27.902	-62.008	49.856
66.8	-10.612	171.277	35.798	-4.036	166.715	-7.861	35.268	-40.54	18.688
66.933	-15.521	49.323	9.708	28.537	94.912	3.872	42.737	-27.055	-15.219
67.067	-21.788	41.745	6.168	36.152	97.233	-17.386	106.439	7.094	-7.928
67.2	1.549	33.948	17.419	138.088	142.123	8.95	20.087	-50.405	1.792
67.333	-68.479	46.538	2.881	-131.272	128.441	-4.595	-66.982	-15.071	-7.748
67.467	-17.07	30.883	7.903	-0.764	145.199	7.96	8.577	-45.285	-88.946
67.6	-10.455	-38.252	-10.146	36.689	118.939	37.237	8.967	-47.502	26.955
67.733	-164.002	-44.703	10.927	17.38	141.064	79.765	13.023	-41.924	11.264
67.867	-45.668	-51.784	10.446	32.005	145.785	67.675	23.332	-36.177	30.955
68	92.12	36.675	-2.888	26.606	175.431	106.277	-10.995	-5.944	-14.496
68.133	38.625	24.947	-10.993	7.601	162.84	125.163	23.58	8.875	16.488
68.267	30.063	123.005	-7.391	173.287	178.291	127.344	13.659	10.039	45.652
68.4	5.517	135.548	-1.229	7.998	207.351	133.248	8.002	60.183	24.292
68.533	42.584	86.625	26.231	37.506	174.57	149.126	-6.281	60.106	25.091
68.667	37.011	49.581	-14.978	9.452	201.051	142.041	31.726	57.212	55.787
68.8	17.807	-26.95	18.191	1.005	176.646	101.911	-6.586	54.464	55.734
68.933	40.205	-11.014	-8.106	-4.924	157.468	101.738	48.102	71.791	137.317
69.067	-29.093	55.742	-24.228	-133.047	182.755	100.385	24.721	91.973	33.952
69.2	-86.974	91.374	11.699	-18.85	161.207	120.434	38.263	36.375	-22.381
69.333	-70.822	124.408	-11.372	15.904	161.28	89.532	45.71	-84.108	113.998
69.467	4.058	37.598	-7.936	53.648	180.286	108.784	20.742	137.709	55.626
69.6	-45.75	154.046	-22.229	34.911	147.549	131.53	24.013	46.698	49.553
69.733	-26.243	70.881	50.486	18.258	145.684	55.457	28.583	8.375	68.333
69.867	-55.968	114.573	78.628	59.818	173.14	33.361	15.344	40.759	28.009
70	42.045	-6.542	20.633	44.84	131.692	-19.759	41.636	17.639	25.204
70.133	43.024	151.461	42.806	94.586	137.231	-21.845	47.537	42.594	15.45
70.267	107.489	45.903	25.147	60.047	111.435	-14.01	73.422	16.363	-65.452
70.4	27.187	74.444	-11.84	49.297	89.966	-11.548	61.686	16.829	1.423
70.533	16.373	22.015	-33.406	35.727	111.063	-96.503	23.501	82.244	100.619
70.667	35.86	34.461	5.433	61.535	167.266	122.123	136.751	51.244	13.821
70.8	-18.019	-22.622	21.408	31.603	101.044	-216.129	-51.659	-19.419	22.599
70.933	-27.871	-27.905	60.335	24.578	78.243	-11.998	82.595	10.131	14.474
71.067	-26.348	-16.946	4.423	-2.192	160.556	-65.156	68.642	-11.573	23.346
71.2	49.321	-13.447	-3.858	78.36	121.11	-78.435	43.46	26.333	-6.63
71.333	23.44	25.925	16.509	122.124	125.907	-29.542	37.168	-47.117	-103.108
71.467	43.565	165.36	4.036	-6.823	107.059	-46.954	33.257	22.443	88.803
71.6	36.914	28.54	-8.8	-48.193	109.09	-35.854	35.994	15.609	-92.845
71.733	102.382	1.906	17.791	-159.772	187.953	19.609	29.393	17.378	-32.622
71.867	85.703	27.187	2.848	-2.135	122.634	-25.935	19.914	13.418	-14.533
72	21.372	12.927	-23.712	33.095	121.318	-10.107	135.592	12.734	4.576
72.133	58.087	-12.27	-3.407	88.536	94.498	-12.458	-23.169	38.671	-25.237
72.267	70.121	-40.003	-17.934	76.38	81.15	32.055	15.142	36.491	-38.788
72.4	55.085	-13.478	-7.127	106.566	65.394	72.654	20.654	-4.995	63.644
72.533	121.723	23.571	-14.427	103.061	73.876	32.775	102.314	4.535	34.663
72.667	78.19	13.722	21.64	63.571	110.66	-21.395	30.822	-0.74	-1.573
72.8	84.996	-6.469	6.564	158.544	79.153	17.735	16.492	4.736	-9.728
72.933	75.883	43.855	16.567	83.864	74.491	32.201	13.808	-7.324	6.601
73.067	-45.403	81.854	7.911	51.14	85.752	19.051	51.738	6.594	9.324
73.2	172.087	107.749	14.973	63.932	66.834	-8.059	37.494	43.375	13.89
73.333	38.23	-11.208	4.253	40.759	69.466	-39.329	121.94	51.864	-23.496
73.467	90.174	2.783	-9.785	94.948	49.726	-93.711	37.906	49.329	-108.966
73.6	26.099	8.323	6.145	124.91	44.29	-209.154	53.573	78.236	-7.438
73.733	-19.748	44.541	-11.795	107.019	-8.157	-6.871	31.958	52.235	-21.25
73.867	-4.383	82.783	10.761	47.921	72.148	-45.684	-61.184	68.468	-36.65
74	-20.726	114.887	6.089	49.946	-14.958	-1.718	56.722	11.42	-15.765
74.133	54.186	13.064	10.271	50.442	29.831	-20.197	124.615	6.703	7.148
74.267	144.068	-15.178	-18.658	84.167	33.026	-7.867	4.337	7.355	7.838
74.4	23.918	56.666	5.398	36.719	-14.059	8.085	8.478	31.931	-38.733
74.533	5.734	69.669	-7.382	27.117	-8.469	70.49	-119.776	6.344	-14.217
74.667	23.687	101.483	-1.445	74.333	42.744	82.737	25.967	12.437	-36.178
74.8	15.236	162.151	-9.203	106.563	40.624	187.809	56.529	7.957	-54.928
74.933	-103.038	52.529	-16.661	55.874	12.442	199.76	-17.78	-7.062	69.472
75.067	-95.99	42.457	-114.564	89.503	13.604	188.291	27.943	-1.843	63.153
75.2	-108.001	29.434	-108.777	79.413	5.785	167.444	-2.029	13.588	44.179
75.333	-154.38	12.077	-114.939	28.995	20.136	105.028	22.751	30.31	17.224
75.467	-165.24	-0.165	-104.702	25.815	22.494	120.141	-13.384	47.288	17.588
75.6	-174.88	10.29	-92.975	12.616	114.338	125.836	-9.203	36.477	-7.157
75.733	-239.414	-11.911	-54.721	49.582	-34.421	70.823	119.209	5.08	-42.967
75.867	-194.021	2.548	-84.124	37.4	-6.881	35.935	-5.208	41.446	8.915
76	-177.494	37.15	-71.009	20.568	49.702	125.039	133.469	31.511	-123.672
76.133	-174.887	-38.919	-34.882	100.592	132.639	11.177	-234.314	6.243	131.153
76.267	-126.279	-20.727	-19.485	24.749	-63.405	93.938	73.623	25.627	35.27
76.4	-78.434	16.496	-56.104	83.935	42.77	112.465	-99.713	13.873	23.402
76.533	-154.918	30.749	-7.148	23.099	29.018	93.396	99.154	12.1	8.716
76.667	-195.964	24.566	14.521	50.878	63.215	159.353	-122.126	15.149	21.068
76.8	-190.223	30.247	-12.483	80.649	44.863	113.61	131.367	-4.391	27.156
76.933	-205.506	31.818	-5.166	39.487	172.179	72.267	3.083	2.474	49.749
77.067	-149.405	-6.743	13.639	57.9	39.444	146.578	-2.406	-5.336	73.643
77.2	-152.251	36.829	-5.252	104.495	6.842	110.654	-115.173	-7.641	64.479
77.333	-120.092	54.371	-5.267	78.269	54.919	44.975	135.333	29.091	-122.134
77.467	-196.266	76.987	-6.13	33.771	30.829	254.997	-42.268	6.489	187.71
77.6	-270.607	44.741	7.721	47.08	190.063	49.839	-20.976	-20.824	52.04
77.733	-173.065	66.308	-6.484	50.154	-37.402	68.252	-16.047	-4.311	46.318
77.867	-248.653	91.057	-6.858	79.176	109.359	-17.674	-53.384	10.004	86.692
78	-249.452	142.274	13.248	16.185	58.222	-20.075	-132.876	12.912	92.792
78.133	-259.619	200.667	20.139	-8.513	63.518	-6.762	72.227	1.696	56.556
78.267	-54.899	228.679	14.33	66.298	98.135	24.481	-114.717	-6.068	56.109
78.4	-140.648	74.958	26.7	59.371	64.32	25.383	-18.511	12.761	92.543
78.533	52.052	64.661	35.153	69.418	214.1	1.549	-161.69	-15.548	76.64
78.667	19.9	45.506	52.311	54.406	104.11	-121.32	-134.368	26.403	-4.823
78.8	61.148	-51.561	17.178	47.126	94.536	62.004	-309.038	6.918	68.021
78.933	22.629	17.946	17.338	22.571	60.395	45.317	-159.385	6.353	18.415
79.067	53.036	-12.595	-7.305	26.478	68.94	57.331	-181.269	2.764	16.911
79.2	101.017	21.469	7.634	58.675	92.759	-44.025	-133.942	16.581	22.601
79.333	55.929	-11.649	9.019	137.497	99.04	-128.738	-153.669	-24.271	52.232
79.467	8.009	10.131	-13.149	82.54	90.912	-21.376	-25.117	35.493	15.684
79.6	33.405	84.194	-6.425	80.324	48.81	-5.933	-56.063	-19.548	80.304
79.733	69.037	-142.592	18.422	77.256	103.626	3.325	-50.433	-3.665	4.911
79.867	26.24	-22.965	10.524	103.647	-77.437	-14.217	-474.764	6.185	-1.69
80	16.832	-74.344	5.256	100.908	162.363	10.395	-56.426	14.347	88.775
80.133	106.146	-125.692	-4.768	116.001	31.347	41.381	135.596	-2.966	19.733
80.267	128.534	-125.419	4.476	65.054	92.165	16.293	-134.974	0.915	30.24
80.4	109.637	-69.066	4.586	56.693	12.549	67.877	-89.976	29.582	39.323
80.533	75.16	-77.959	-8.89	72.362	65.511	105.808	3.037	6.15	12.958
80.667	103.729	-81.879	17.435	50.869	24.96	171.336	13.761	-2.619	-5.939
80.8	88.938	-116.836	-14.073	92.75	107.939	159.138	21.424	6.7	43.498
80.933	93.477	-168.814	13.33	84.098	-16.649	199.226	-6.088	-5.392	-8.769
81.067	118.999	-197.834	-4.281	65.577	104.897	219.847	22.012	-24.483	-2.218
81.2	75.66	-182.863	5.344	37.986	115.314	193.052	6.422	30.548	8.779
81.333	89.457	-147.516	-9.574	36.341	33.942	140.517	21.67	-15.702	1.719
81.467	45.405	-174.926	-10.917	39.024	210.351	85.448	51.929	3.936	41.394
81.6	161.394	-145.733	-8.33	18.545	83.618	21.004	35.232	4.038	23.495
81.733	88.996	-127.759	7.863	20.525	51.347	-95.202	8.96	9.774	7.947
81.867	120.344	-90.684	6.299	-44.188	61.409	-91.746	141.852	-6.971	18.387
82	112.376	-115.507	1.828	92.391	68.603	-117.857	140.635	12.136	22.06
82.133	71.158	-119.743	11.159	69.666	58.348	-118.757	-216.361	-35.418	26.984
82.267	21.695	-124.012	-3.889	65.586	47.282	-82.786	10.928	9.005	32.714
82.4	96.496	-114.676	4.752	188.227	20.815	-67.842	50.577	7.472	52.665
82.533	74.386	-74.743	-2.484	44.438	66.816	-228.668	16.626	-5.582	61.841
82.667	91.144	-11.854	12.243	27.788	-112.528	-104.627	41.006	-19.745	42.07
82.8	49.686	1.236	-0.404	9.414	172.183	66.915	3.464	-22.673	-48.818
82.933	65.46	38.946	-4.083	-1.726	124.333	-38.418	55.297	-54.759	137.797
83.067	145.694	54.708	17.604	24.63	-11.35	-245.084	25.375	-84.127	30.141
83.2	114.412	20.773	-6.168	6.795	114.968	-121.998	-6.739	-127.5	-57.984
83.333	134.994	59.593	-4.344	9.928	81.761	-121.483	16.067	-85.647	23.259
83.467	114.843	26.826	6.413	-3.81	78.577	-122.655	7.542	-82.77	23.626
83.6	112.143	17.36	10.386	-3.328	38.009	-121.977	-22.648	-32.523	122.177
83.733	128.091	-16.772	-1.235	15.297	90.406	-244.192	24.425	-57.867	20.282
83.867	162.888	18.589	-7.544	-35.755	33.844	-0.74	-23.108	-22.504	16.462
84	141.088	37.49	-13.203	-115.523	71.337	-10.671	271.731	-58.234	-81.076
84.133	108.791	28.602	8.234	22.241	32.143	-21.395	-198.839	-114.861	8.236
84.267	73.757	16.157	-13.738	165.063	50.806	0.29	21.754	-51.535	446.81
84.4	122.36	21.707	-2.564	7.333	54.63	123.632	9.013	-42.31	28.916
84.533	122.425	28.37	7.738	-11.034	1.419	-28.355	-2.525	-16.214	69.316
84.667	125.979	16.467	15.875	23.715	96.793	1.387	-15.152	-38.615	14.703
84.8	146.644	20.927	-4.614	-24.597	84.196	-122.383	29.47	-71.714	101.891
84.933	170.596	26.051	-11.371	1.985	211.844	122.297	43.739	-93.603	28.616
85.067	202.253	-19.303	8.584	22.591	161.222	123.533	-13.65	-24.218	19.583
85.2	135.398	-21.611	1.578	-11.493	228.561	-10.237	42.039	-37.278	15.784
85.333	150.101	34.612	-5.824	42.906	76.355	-15.005	139.598	-8.256	-29.451
85.467	130.661	7.262	7.765	87.684	-63.531	-1.899	-77.443	-8.749	-108.121
85.6	73.867	12.249	-5.237	57.159	42.282	123.453	35.339	-4.905	-9.3
85.733	53.226	43.417	-24.999	118.54	96.01	-8.011	26.985	-28.544	37.012
85.867	49.563	2.128	29.14	29.569	201.796	123.593	42.438	25.724	-5.457
86	131.631	3.383	-1.658	56.906	113.548	-2.825	62.418	-19.015	25.274
86.133	107.762	50.053	-14.214	34.213	113.039	-4.514	18.818	-1.811	29.181
86.267	97.645	-4.637	1.384	25.193	129.064	-123.822	44.039	-84.287	148.822
86.4	86.632	50.917	2.673	22.868	125.182	125.177	63.529	-31.408	64.783
86.533	12.974	45.845	5.811	46.84	119.569	-125.343	135.325	-71.605	87.083
86.667	122.659	16.584	-17.33	-4.418	87.557	123.313	-2.731	-18.57	80.939
86.8	74.645	5.158	-5.995	30.795	2.061	989.697	-2.171	-59.786	-15.453
86.933	82.157	48.955	-3.455	-102.286	243.7	8.709	-66.27	-49.154	29.157
87.067	79.59	44.853	7.357	128.553	93.871	125.874	29.292	-63.375	45.151
87.2	45.069	36.101	-18.39	24.575	85.247	124.666	22.818	-64.064	42.622
87.333	-13.058	-15.844	-8.674	9.013	-7.392	122.978	3.106	-82.557	30.086
87.467	77.949	12.645	-9.704	5.331	51.507	2.328	26.522	-104.753	36.606
87.6	204.754	19.932	-2.178	1.814	229.88	4.779	14.215	-93.61	16.575
87.733	-91.549	1.449	-3.951	6.406	69.026	122.717	12.798	-51	-14.626
87.867	100.942	7.397	2.965	7.285	52.306	122.554	-29.258	-76.19	57.237
88	60.217	38.534	-21.051	25.927	74.268	-3.976	-9.578	-126.165	-12.516
88.133	90.293	59.32	-15.514	-7.722	98.145	-4.744	21.428	-81.517	19.309
88.267	91.918	29.367	-29.5	-18.05	67.295	123.478	23.237	-121.441	145.741
88.4	92.418	56.43	-26.431	-16.286	60.416	0.196	-39.657	-83.133	58.462
88.533	70.849	39.259	-67.241	-149.963	62.147	0.82	-19.578	-47.368	41.185
88.667	110.536	45.488	-82.717	125.091	92.749	123.218	-9.406	-35.366	-73.95
88.8	77.207	52.568	-68.998	5.691	68.449	3.074	-9.544	-37.971	47.776
88.933	171.383	2.277	-76.363	13.287	48.143	-122.606	-52.588	-20.323	13.25
89.067	61.144	41.186	-48.694	-13.69	66.236	-0.531	4.898	15.866	-30.283
89.2	24.379	56.396	-86.354	4.748	-9.604	122.942	-53.936	12.938	-6.399
89.333	-130.688	66.915	-69.464	-32.324	29.878	14.396	-84.906	-16.496	26.191
89.467	20.42	50.825	-62.969	-131.058	12.659	27.29	-122.998	17.111	-66.905
89.6	24.727	70.087	-72.345	-150.837	-12.851	126.415	-109.095	-10.768	-216.897
89.733	79.652	32.325	-50.323	-174.681	12.155	245.993	-23.567	21.977	-236.88
89.867	218.914	62.774	-71.599	-177.219	15.423	32.665	-253.425	59.532	-199.615
90	53.431	45.59	-23.6	-162.118	27.839	70.225	-130.393	-16.782	-146.503
90.133	59.148	107.145	-61.898	-224.056	16.753	40.154	-132.187	42.888	-207.343
90.267	128.914	76.888	-36.605	-167.236	31.198	43.471	-149.542	27.629	-562.136
90.4	101.93	107.317	-15.281	-116.111	41.664	94.054	-71.945	46.332	57.875
90.533	54.175	35.559	-46.292	-62.639	5.502	80.896	-148.188	9.663	-25.555
90.667	-19.3	88.799	-9.052	-191.406	34.692	80.267	-106.465	-36.516	-178.63
90.8	291.459	26.262	-24.923	-32.318	34.49	83.913	-82.78	105.425	42.241
90.933	114.362	14.571	7.061	1.451	44.752	32.512	-130.825	8.442	-70.194
91.067	99.656	-29.821	5.214	-5.813	-0.158	126.193	-95.972	73.273	-129.88
91.2	122.671	-9.355	-1.144	52.628	21.632	124.154	-108.498	54.739	-20.427
91.333	127.458	-54.495	-22.615	-119.772	-93.454	92.379	-73.646	22.007	-60.542
91.467	149.57	-23.857	-11.975	-97.657	137.655	70.287	-53.959	55.525	-21.758
91.6	102.158	26.862	1.935	-113.938	30.904	35.339	-94.336	-12.137	43.478
91.733	97.968	163.459	-22.875	-120.579	-10.397	59.387	-32.157	49.971	23.927
91.867	133.596	10.62	-4.752	-94.093	80.433	99.772	10.622	-48.717	33.245
92	32.543	137.653	18.039	-94.779	55.226	37.618	38.245	-8.437	54.181
92.133	92.191	-81.742	41.945	-43.375	72.273	36.553	-24.217	51.199	41.199
92.267	97.795	23.687	54.229	-46.969	-28.534	11.752	8.93	63.264	31.611
92.4	229.39	-16.394	49.308	30.738	158.649	30.094	7.292	22.53	22.807
92.533	125.154	2.006	37.327	16.234	61.945	29.595	35.769	39.974	30.572
92.667	135.452	2.371	-30.271	-3.938	44.248	35.716	-9.804	13.066	47.561
92.8	120.435	-40.256	-12.311	29.205	18.269	19.458	-9.017	36.596	43.457
92.933	-25.745	14.955	15.25	-17.892	35.882	30.068	2.159	-3.325	6.68
93.067	66.989	69.497	32.604	44.833	66.979	35.543	39.296	4.494	17.847
93.2	65.57	8.465	34.826	93.236	21.663	46.309	22.321	21.173	11.948
93.333	151.103	-28.829	7.74	123.631	54.086	56.34	-39.253	8.123	22.343
93.467	366.735	25.234	-9.449	68.327	100.464	65.828	-62.297	-9.981	19.504
93.6	121.77	4.542	-18.768	38.313	129.591	59.115	-10.277	-3.208	17.568
93.733	163.544	33.406	-35.303	86.846	86.132	65.098	-26.453	-4.281	52.383
93.867	86.881	50.04	-52.317	52.979	122.978	74.379	-60.564	1.536	43.694
94	-44.502	66.56	-64.081	89.522	104.045	48.97	-24.475	-35.936	17.384
94.133	227.258	217.376	-30.254	31.725	87.826	-12.014	15.901	-49.824	-11.183
94.267	134.397	-59.144	-17.643	115.493	106.086	59.969	-11.842	-153.897	-135.945
94.4	134.421	13.158	-3.898	109.714	104.107	55.529	-25.77	-81.695	-107.537
94.533	130.607	34.321	-33.893	80.128	96.134	47.208	-22.033	-110.246	-97.31
94.667	11.519	185.409	-34.109	82.23	132.339	109.319	5.072	-145.416	-70.927
94.8	218.221	-37.883	-113.106	30.851	108.023	75.867	21.283	-134.131	-100.325
94.933	110.927	55.693	-34.967	50.955	102.278	55.901	46.436	-91.753	-130.651
95.067	134.454	46.242	-54.901	55.331	104.491	38.478	64.471	-117.935	-181.142
95.2	127.219	57.44	-103.307	23.751	143.179	66.456	217.011	-69.011	-109.949
95.333	111.583	52.744	-80.698	49.501	127.761	-4.754	133.722	-85.605	-66.878
95.467	90.247	43.578	-82.755	64.5	93.749	-11.147	23.419	-61.321	9.033
95.6	79.39	47.721	-36.52	94.445	136.244	26.039	7.506	-41.795	47.144
95.733	149.76	-4.811	-58.718	59.116	76.955	9.27	25.235	-81.583	-90.468
95.867	237.685	10.791	-22.908	21.47	111.637	-3.892	32.151	-43.291	-312.137
96	-5.228	37.961	33.999	52.428	142.081	149.911	10.998	-97.644	-250.37
96.133	167.34	18.506	-42.414	76.111	131.229	-4.373	-15.323	-13.382	-157.804
96.267	84.876	17.299	5.46	56.883	109.867	60.903	1.29	22.829	-68.888
96.4	141.092	-16.494	3.354	34.764	96.936	159.062	3.633	-37.65	-35.862
96.533	188.902	19.222	18.702	30.93	79.781	37.125	-12.806	-14.473	17.014
96.667	61.405	22.552	14.062	43.128	101.959	48.266	-9.268	149.796	-17.1
96.8	182.728	90.329	-2.142	41.171	174.069	-64.554	-10.831	27.93	76.624
96.933	218.446	30.811	23.847	14.576	120.591	41.734	24.685	22.301	161.488
97.067	125.147	61.641	-17.478	13.638	119.916	36.431	44.073	-3.988	82.609
97.2	98.811	51.416	-20.728	-5.784	105.368	29.91	-4.186	18.88	58.801
97.333	138.469	43.251	46.72	11.349	112.931	33.709	-3.809	15.843	20.665
97.467	146.251	11.304	-55.041	15.76	86.73	90.619	-7.804	-15.549	15.793
97.6	43.017	57.82	51.925	-50.284	109.988	-81.393	16.496	-1.932	27.073
97.733	69.637	35.894	24.571	-30.282	74.54	71.419	-26.073	116.959	40.487
97.867	30.98	5.923	27.501	-83.938	70.871	69.726	-61.694	-4.22	55.682
98	-30.483	129.247	39.209	-18.616	66.178	39.883	-110.652	-112.515	-5.495
98.133	165.364	48.773	46.51	-36.997	79.64	16.209	-134.214	6.38	-98.626
98.267	98.38	-53.841	23.272	-36.501	75.995	-10.682	-60.685	-7.787	21.057
98.4	60.652	39.383	-0.62	-14.138	26.126	80.878	-84.175	4.818	-46.325
98.533	62.839	113.7	-16.904	46.113	69.795	38.431	-99.401	-13.464	9.186
98.667	146.914	75.795	34.138	40.185	-10.686	51.189	-96.211	-16.808	-11.088
98.8	-122.56	103.215	-34.643	48.441	147.349	44.14	-99.463	13.469	-60.468
98.933	211.196	110.639	24.504	18.443	54.852	22.887	-166.349	-23.75	-95.443
99.067	52.333	80.346	-3.569	-11.449	13.614	32.591	-126.791	38.545	-175.413
99.2	-93.986	59.149	24.172	26.443	89.888	29.337	-137.915	9.242	-167.139
99.333	-29.961	21.35	-1.866	-22.479	71.655	13.851	-239.88	66.826	-156.67
99.467	-29.961	47.981	37.582	21.474	57.811	-23.585	-279.848	31.255	-130.935
99.6	-198.083	51.423	6.678	-18.596	70.779	128.418	-173.267	103.567	-119.362
99.733	-231.947	-4.281	39.931	7.508	74.779	-78.091	-121.693	71.428	-71.768
99.867	-286.26	49.047	45.063	-5.008	43.578	53.238	-80.644	24.772	-54.917
100	-429.951	101.672	-38.093	-2.773	63.925	55.257	-84.297	-22.543	-121.215
100.133	-163.895	45.54	99.672	-35.085	58.588	20.1	-85.666	13.98	12.275
100.267	-277.497	-4.697	77.975	-77.764	74.045	28.726	-35.136	24.948	36.044
100.4	-266.107	29.809	-68.801	-235.387	73.011	39.756	-17.513	76.083	45.31
100.533	-134.425	26.615	11.365	-207.108	75.135	32.811	-28.864	85.025	91.496
100.667	-108.723	22.419	14.537	-167.371	41.514	80.899	-16.357	-8.727	51.338
100.8	-137.299	-7.441	0.794	-193.778	70.197	43.667	-89.517	16.835	38.604
100.933	-74.066	25.355	113.024	-194.586	69.603	-22.34	-179.303	168.697	106.612
101.067	-70.564	32.31	47.764	-150.114	69.833	9.527	-96.571	30.789	97.969
101.2	-43.649	1.083	37.03	-179.52	84.647	36.154	-209.099	10.24	84.008
101.333	16.185	-6.923	131.949	-187.778	59.524	-26.978	-221.375	10.231	46.357
101.467	226.558	14.125	21.126	-74.281	48.846	10.315	-171.052	64.053	71.787
101.6	167.84	69.481	85.602	-48.717	73.598	12.018	-157.303	143.151	19.874
101.733	176.705	73.503	47.491	-95.27	60.383	0.144	-105.505	40.955	57.043
101.867	248.747	49.755	22.265	-45.872	45.976	19.599	-107.256	34.456	98.35
102	146.5	55.342	29.099	-38.502	-4.722	5.238	-146.287	-94.347	29.572
102.133	98.68	43.958	22.433	-83.336	155.252	2.542	-156.726	16.381	4.071
102.267	99.22	62.173	14.745	-75.456	88.123	24.756	-111.614	10.873	9.945
102.4	101.064	23.71	36.749	-133.569	-29.626	45.147	-46.309	-14.12	66.752
102.533	145.413	-3.629	44.211	-130.445	181.237	-16.186	27.319	-50.383	126.733
102.667	-144.483	45.293	-7.504	-90.617	-56.255	-6.05	134.583	-137.32	13.533
102.8	309.016	42.125	-12.512	-54.895	82.064	-5.387	-72.176	-204.648	171.928
102.933	74.171	45.413	43.696	-30.559	35.897	14.418	34.592	-137.721	69.574
103.067	91.008	72.16	-1.964	-215.636	135.938	31.301	115.125	-122.557	76.261
103.2	13.843	41.772	13.835	-218.695	97.46	21.519	49.758	-89.987	95.528
103.333	-29.824	-8.787	16.89	-149.704	91.002	83.665	153.344	-95.876	66.378
103.467	-140.943	46.529	47.655	-138.242	36.036	64.313	96.335	-108.427	24.932
103.6	5.357	33.995	45.302	-103.728	74.759	79.657	84.542	-42.261	31.935
103.733	17.657	37.976	66.013	-119.584	29.657	110.502	25.085	-108.131	40.203
103.867	-45.867	62.187	86.2	-63.372	17.304	52.755	13.041	-68.192	60.649
104	17.381	277.285	132.577	-47.712	-80.244	67.151	33.734	-81.671	58.775
104.133	47.004	-224.707	-70.519	-27.699	25.225	31.299	65.13	-76.232	92.441
104.267	202.061	-14.269	39.077	38.167	167.343	35.835	29.708	-96.08	88.821
104.4	-22.956	37.049	88.867	-39.859	39.752	18.797	58.826	5.854	68.734
104.533	-31.502	42.709	31.529	29.783	-35.873	60.903	124.149	-21.681	50.117
104.667	-22.455	57.301	39.982	10.352	129.756	27.774	127.071	-23.805	66.443
104.8	-252.08	98.483	28.134	19.944	52.961	-1.896	60.032	5.146	91.542
104.933	-213.771	88.707	49.839	126.571	-69.696	-20.965	34.87	-25.21	128.55
105.067	-223.325	105.03	5.06	-15.333	38.471	-29.942	15.431	54.483	78.8
105.2	-283.982	63.404	4.474	-43.691	22.652	4.257	37.022	11.888	28.295
105.333	-282.317	25.832	133.197	-86.132	139.354	-70.456	133.076	107.847	-259.674
105.467	-51.683	76.713	-113.856	-5.095	8.398	7.121	-29.302	107.8	252.604
105.6	-199.164	76.686	26.003	-51.916	57.876	-4.523	-23.936	144.668	52.45
105.733	-161.965	29.31	-8.605	-63.909	58.204	-37.597	81.859	82.07	50
105.867	-61.952	80.656	4.854	-82.082	87.096	-44.372	63.608	99.544	-8.649
106	7.855	34.281	-7.438	-135.949	104.18	-125.18	73.107	69.681	27.268
106.133	7.162	21.232	31.992	-180.867	81.657	-132.924	38.654	71.825	-2.879
106.267	24.185	-12.051	17.415	-135.432	49.004	-56.384	27.642	69.707	11.811
106.4	45.413	50.532	31.095	-125.05	57.446	-62.426	29.43	50.066	31.111
106.533	74.104	24.678	16.316	-127.311	33.4	-31.025	12.271	91.069	58.036
106.667	-21.177	63.498	132.629	-227.633	58.652	-18.007	32.245	65.945	76.801
106.8	73.785	-8.473	-35.147	-69.866	45.11	-12.141	14.2	71.913	17.049
106.933	87.67	30.669	47.105	-44.265	50.272	8.097	60.481	94.175	24.025
107.067	88.613	-7.177	20.342	142.381	22.478	5.489	42.501	63.245	149.724
107.2	124.203	32.469	34.044	-27.23	20.436	-37.683	62.748	82.691	-105.286
107.333	54.702	9.101	45.453	-70.421	51.723	-39.432	54.331	38.722	392.876
107.467	49.708	63.438	-22.577	-160.156	68.696	8.831	26.499	30.508	78.405
107.6	78.813	22.243	25.608	143.19	25.176	47.967	53.962	57.621	290.622
107.733	68.607	2.069	11.456	35.218	87.454	-20.544	23.032	33.67	17.546
107.867	170.008	70.457	29.771	30.715	50.464	18.519	27.066	78.949	24.981
108	145.229	60.192	-21.705	2.865	20.215	5.497	46.849	96.437	14.679
108.133	-18.364	28.082	-39.059	31.479	55.87	-10.429	23.427	49.744	-20.195
108.267	75.07	99.913	21.505	-5.032	-35.014	9.249	44.643	47.746	12.778
108.4	147.104	61.759	-15.55	15.913	54.689	6.718	10.209	34.874	18.136
108.533	122.283	68.227	8.21	83.642	143.904	-4.383	-8.023	93.308	15.109
108.667	83.155	30.84	16.287	3.098	17.49	-19.483	20.62	63.515	-2.577
108.8	114.535	-11.21	30.993	-138.591	47.475	-14.109	8.208	40.519	7.264
108.933	94.921	-2.846	37.003	104.614	6.713	-39.637	32.667	40.057	-9.432
109.067	112.337	27.237	45.316	-2.157	-77.057	-29.252	51.951	36.4	3.37
109.2	131.249	189.921	86.376	-1.608	132.471	-9.37	24.812	49.098	10.007
109.333	145.977	78.104	133.362	20.419	56.3	-40.314	-2.813	15.793	-3.007
109.467	164.136	45.291	-57.428	21.521	59.275	-25.838	58.278	40.809	-1.732
109.6	117.327	19.061	40.751	22.881	61.166	-29.317	45.76	52.25	6.314
109.733	113.774	10.069	47.093	7.022	46.923	-97.905	114.322	48.545	-12.504
109.867	287.812	-10.469	5.105	11.686	26.314	-105.572	32.034	-4.247	-14.435
110	-31.246	-57.836	41.855	20.36	61.136	-64.374	63.669	53.773	27.651
110.133	57.421	-52.392	9.977	18.055	15.224	-63.559	48.481	138.541	-28.125
110.267	73.315	-8.213	-4.591	24.817	25.602	-78.599	68.961	41.521	-6.995
110.4	166.822	-9.211	-1.361	-26.469	40.173	-68.657	29.977	72.763	-26.838
110.533	-103.445	33.542	-8.142	4.878	29.329	-38.3	-6.822	60.006	-42.724
110.667	-27.576	53.691	133.532	4.323	52.318	-17.482	33.404	81.686	-25.987
110.8	62.109	153.203	-73.453	136.289	31.474	11.49	13.378	99.787	-794.585
110.933	19.892	181.152	26.658	-113.659	61.898	43.479	58.115	101.793	-80.956
111.067	17.952	39.01	51.053	139.926	62.325	5.058	41.337	56.054	7.104
111.2	46.502	45.182	57.874	7.51	46.632	-6.104	47.759	83.65	-91.429
111.333	141.45	8.693	41.857	8.139	59.818	4.162	46.65	23.87	-22.188
111.467	-74.005	73.365	-12.255	6.658	49.828	11.212	23.562	68.391	38.523
111.6	6.473	-29.404	54.947	12.788	38.952	-5.299	-9.067	18.52	14.826
111.733	102.733	-45.349	60.345	-8.657	13.663	-7.89	12.964	22.847	27.467
111.867	73.473	-10.844	39.205	6.801	15.392	41.734	22.243	29.085	316.3
112	145.462	-22.287	41.716	24.379	52.364	13.359	9.703	29.057	-27.791
112.133	-21.884	-26.787	52.36	26.679	-3.117	28.676	5.525	6.87	17.823
112.267	40.237	-53.681	-22.56	-6.295	63.643	40.438	-12.069	6.726	450.378
112.4	100.446	-24.733	15.831	26.694	54.919	62.149	35.023	16.75	37.174
112.533	50.755	-40.058	37.491	-5.225	44.835	91.423	36.623	0.71	22.348
112.667	69.891	32.616	-10.521	-119.825	41.686	43.934	33.526	36.056	6.439
112.8	67.381	95.712	15.083	113.898	54.002	73.22	36.073	21.636	11.42
112.933	56.958	73.602	-23.074	-0.858	26.849	11.603	37.453	18.779	47.134
113.067	36.843	15.161	-12.565	9.455	32.648	75.211	67.724	18.323	49.997
113.2	57.64	50.1	28.126	-2.255	49.345	69.353	4.379	-4.736	66.892
113.333	-11.81	7.365	15.662	-128.053	69.574	57.79	16.791	8.92	48.512
113.467	155.649	-61.411	18.737	0.803	35.115	81.674	26.319	8.518	50.249
113.6	96.64	-195.382	16.78	111.008	53.784	80.343	40.28	-10.109	34.898
113.733	51.816	-110.355	30.875	8.267	59.828	82.526	17.253	-29.366	73.721
113.867	63.904	-70.089	26.311	-10.673	70.913	8.33	43.438	32.93	37.543
114	50.09	-45.121	11.397	-134.354	46.614	42.241	33.828	2.346	53.132
114.133	72.26	-74.012	17.899	-191.631	75.155	18.923	10.047	8.774	6.369
114.267	49.106	-131.372	6.52	-109.118	33.468	11.747	34.908	-18.299	38.395
114.4	60.147	-157.83	10.973	-146.184	43.909	20.514	66.078	18.422	36.489
114.533	32.03	-164.86	55.566	-241.723	69.72	16.133	100.778	-22.512	2.059
114.667	59.896	-121.397	31.123	-124.536	64.496	14.021	32.805	35.88	49.322
114.8	53.302	-90.605	94.581	-78.719	79.231	50.366	-99.807	-30.739	41.155
114.933	41.386	-48.727	-27.757	-166.697	69.938	-15.344	3.115	15.275	5.37
115.067	26.851	-10.683	63.147	-143.674	88.246	-21.254	12.256	-9.116	27.677
115.2	71.603	-5.037	-7.3	-197.557	58.275	10.024	18.809	-11.885	-5.61
115.333	44.918	-9.146	-31.843	7.495	55.192	21.297	29.693	-44.383	15.117
115.467	37.19	-26.204	29.272	-132.495	55.102	-23.941	-5.658	-12.589	3.786
115.6	52.113	3.036	52.775	-139.931	40.954	53.007	40.73	-20.621	-19.963
115.733	-22.89	-9.307	-18.606	-69.928	61.019	19.217	22.386	-30.761	5.102
115.867	28.254	-6.672	24.412	-121.806	57.306	-10.651	-7.979	-17.311	7.213
116	15.702	10.59	17.514	50.165	58.022	-6.87	7.062	11.936	17.734
116.133	-13.505	26.848	34.272	-15.477	70.131	15.496	53.522	-24.314	-11.447
116.267	24.405	-21.018	12.974	63.966	74.935	15.148	75.812	-20	13.299
116.4	77.49	9.314	39.388	24.943	88.464	-2.247	42.968	10.888	30.016
116.533	54.204	8.258	47.24	5.737	48.977	4.85	66.018	-53.402	13.481
116.667	86.71	-1.091	-7.012	31.216	41.438	6.834	58.637	-156.122	33.818
116.8	101.313	-20.889	11.361	192.101	72.432	9.288	84.313	-19.932	42.643
116.933	92.831	41.933	37.42	64.817	40.641	1.388	29.697	-14.485	-2.321
117.067	80.011	55.638	9.202	77.276	58.561	-3.784	80.92	8.928	78.892
117.2	100.239	16.347	3.931	13.971	43.967	12.536	64.889	11.41	51.712
117.333	46.967	25.049	-18.69	2.856	53.811	13.903	47.296	95.757	53.99
117.467	58.314	9.168	43.064	-12.207	54.04	34.309	53.631	28.65	9.58
117.6	52.995	76.787	8.502	-72.823	54.228	-37.043	41.8	58.852	11.382
117.733	64.652	15.572	10.993	105.37	73.723	1.035	20.433	104.402	9.667
117.867	50.304	91.006	-28.447	48.405	-27.738	49.423	7.305	-84.515	23.634
118	83.472	55.093	20.981	233.689	137.968	22.617	-1.872	48.107	-39.628
118.133	61.657	25.181	7.202	-97.684	58.75	48.393	-19.569	110.503	57.182
118.267	71.391	29.943	31.032	65.997	69.265	49.186	15.11	47.025	45.915
118.4	20.827	25.295	13.035	92.859	47.354	23.649	31.311	-141.699	30.796
118.533	26.081	49.339	5.558	58.24	11.163	88.177	23.679	47.016	57.024
118.667	-1.105	41.754	27.781	65.562	100.13	72.235	1.415	-85.762	7.308
118.8	89.708	14.512	35.459	186.802	36.599	39.411	-4.074	12.301	60.165
118.933	52.886	23.795	36.751	106.472	41.513	24.05	16.051	12.746	47.055
119.067	73.068	-5.987	5.942	81.893	37.26	-2.521	33.523	5.283	20.471
119.2	135.856	31.092	17.177	63.922	53.459	3.792	-18.703	16.851	43.254
119.333	-43.875	9.607	3.415	64.524	44.829	4.057	70.073	111.335	30.981
119.467	64.178	1.655	9.192	122.917	92.016	4.491	10.589	-5.845	49.773
119.6	20.266	8.252	1.175	79.655	1.196	15.681	49.283	29.64	30.453
119.733	173.872	35.718	34.619	55.392	34.892	5.38	76.751	-11.261	31.874
119.867	76.92	-29.103	6.948	19.563	51.104	22.699	65.437	1.919	63.282
120	33.743	-5.439	-1.89	-5.834	-48.414	-27.238	137.305	-20.861	127.385
120.133	243.809	195.136	-164.084	-150.256	-61.749	-221.096	-152.406	-188.352	-228.664
120.267	297.624	300.387	237.682	-77.965	226.223	10.011	-154.091	485.028	225.284
120.4	301.427	244.002	332.012	-302.628	209.541	26.311	-165.384	359.236	118.044
120.533	254.028	89.51	150.899	-158.353	135.623	-10.079	-169.003	368.361	39.382
120.667	118.406	15.682	51.225	-29.292	38.666	-5.825	-130.399	330.853	82.624
120.8	175.15	-1.297	48.577	8.351	91.716	-5.45	-157.398	144.604	50.69
120.933	147.238	8.923	82.371	-8.433	65.427	13.874	-131.205	245.193	45.957
121.067	158.904	63.204	11.423	3.318	93.193	134.581	-287.573	71.197	126.144
121.2	75.702	128.172	146.203	117.112	237.164	-13.36	-185.73	140.377	19.469
121.333	135.786	29.567	15.72	-3.226	59.294	-8.33	-124.686	90.599	82.199
121.467	136.269	3.559	11.552	-12.969	75.62	-3.991	-124.544	138.936	77.042
121.6	163.902	7.512	-12.294	31.599	66.843	16.58	-124.325	161.948	52.427
121.733	126.822	51.809	7.07	12.869	86.691	14.608	-100.757	124.838	8.161
121.867	43.584	114.747	6.517	6.343	57.058	16.361	-140.446	251.491	20.486
122	185.848	91.292	18.443	-8.55	75.89	-14.23	-169.679	59.908	21.144
122.133	141.382	51.043	8.717	-5.242	82.126	3.135	-98.967	163.187	36.565
122.267	95.316	121.33	-10.209	13.653	82.755	2.619	-48.398	155.734	10.85
122.4	98.914	-25.467	-4.974	-6.275	87.846	16.867	-54.612	118.78	10.064
122.533	47.549	59.682	-90.194	-1.175	69.575	26.628	-50.45	156.141	4.001
122.667	72.326	21.611	-31.431	-10.6	80.506	46.961	61.988	128.193	30.524
122.8	74.83	4.741	-78.913	11.07	59.069	21.044	20.455	174.063	-10.058
122.933	76.095	12.663	-21.443	-0.298	72.583	35.91	-22.624	162.65	-9.976
123.067	55.866	-6.384	-42.766	1.476	82.504	30.776	-108.355	152.034	9.3
123.2	133.203	24.195	-180.277	-5.984	45.374	-13.139	-37.204	198.908	9.267
123.333	108.675	23.968	-240.482	1.909	116.07	19.181	-9.448	42.788	3.605
123.467	85.545	5.322	-204.208	3.018	92.55	6.591	133.762	99.508	35.081
123.6	85.339	13.476	-54.058	-10.189	58.01	-42.495	-9.845	127.113	-18.512
123.733	102.664	-32.058	-31.053	4.839	96.858	10.433	30.966	92.746	30.682
123.867	93.987	15.881	-14.394	-2.45	88.008	15.541	59.759	81.469	98.312
124	51.128	33.658	-32.579	-9.201	103.832	5.836	14.658	72.461	75.355
124.133	60.371	-26.486	-29.347	-3.22	82.692	17.11	47.977	45.792	46.093
124.267	92.503	30.798	-27.564	-1.367	71.92	30.902	56.984	3.542	36.54
124.4	84.244	-7.821	-13.184	4.849	77.421	32.573	90.563	17.799	27.94
124.533	62.331	25.923	-178.084	-13.649	67.331	44.184	57.613	9.884	25.129
124.667	55.496	252.258	-331.872	-18.138	25.078	-16.561	30.413	14.812	16.683
124.8	44.527	-45.138	-110.912	10.868	82.711	49.072	32.78	-0.159	30.474
124.933	72.726	30.858	-26.124	16.595	75.243	-19.941	20.699	-2.16	-4.47
125.067	51.908	135.42	-45.691	-66.613	-39.942	23.183	18.567	3.733	22.478
125.2	32.166	-47.99	-49.644	-257.311	230.831	9.739	18.797	79.689	-6.308
125.333	67.354	5.759	-67.483	-168.997	-23.302	-14.238	-22.413	122.546	-7.573
125.467	38.107	43.397	-32.626	-259.988	190.692	-17.183	-3.567	61.584	-9.532
125.6	82.867	40.411	4.25	-232.113	104.932	7.781	10.84	42.655	-8.388
125.733	37.547	6.693	-22.751	-199.383	78.339	-33.843	-7.14	53.373	-37.984
125.867	49.899	53.718	-34.796	-165.484	48.384	29.015	53.145	75.475	18.388
126	8.368	21.203	-24.445	-136.326	55.383	4.11	-7.373	44.16	-41.182
126.133	77.733	-0.608	-4.974	-96.276	37.451	-11.636	-7.11	45.147	-142.805
126.267	2.984	15.355	-13.168	-107.927	54.688	-37.48	-8.768	3.408	-187.507
126.4	-16.176	11.285	-6.912	-96.463	61.292	-13.213	-8.563	2.475	-169.543
126.533	36.169	-9.584	28.983	-41.904	44.394	-28.035	-18.25	-13.722	-179.259
126.667	21.193	6.463	-24.209	-24.861	81.326	43.248	32.04	18.242	-171.389
126.8	12.385	-18.241	5.138	-55.022	66.673	-13.885	-10.432	3.564	-209.987
126.933	17.631	-129.02	-14.221	37.951	88.29	25.202	-21.555	1.84	-145.59
127.067	37.315	-217.025	-54.655	121.182	54.821	19.914	24.832	5.646	-152.555
127.2	20.555	-298.609	-46.769	42.161	12.914	-14.732	9.203	-9.521	-108.554
127.333	22.446	-230.137	-92.054	101.253	62.015	11.256	20.86	13.86	-134.783
127.467	-4.757	-185.491	-125.036	119.91	44.069	-12.313	9.643	4.275	-125.918
127.6	-13.163	-194.572	-121.59	111.072	19.421	-102.539	27.306	20.018	-140.554
127.733	-30.199	-138.061	-101.759	137.669	85.507	-195.43	70.612	34.988	-147.354
127.867	-35.86	-96.557	-82.461	-17.696	76.547	-131.037	41.321	88.801	-123.577
128	-25.402	-77.147	-76.887	106.876	85.852	-56.445	59.479	122.175	-114.834
128.133	-45.296	-59.405	-100.334	55.311	50.086	-107.384	18.254	98.595	-116.815
128.267	-93.288	-34.604	-81.835	103.79	11.723	-96.428	-76.927	95.691	-131.182
128.4	-94.495	23.807	-90.601	248.954	153.984	-125.322	66.245	94.7	-137.484
128.533	-119.375	53.917	-38.474	173.244	146.106	-153.29	25.833	64.613	-169.84
128.667	-62.726	52.841	-35.449	165.476	100.08	-81.908	25.815	32.46	-128.769
128.8	-116.338	28.919	-54.198	81.116	16.158	-54.037	-13.871	7.984	-207.831
128.933	-159.246	62.308	-51.19	41.372	69.7	-50.592	42.081	23.704	-73.043
129.067	-107.109	14.323	-86.881	17.939	48.858	8.776	-4.259	12.289	-66.64
129.2	-76.552	22.54	-124.116	98.033	25.617	15.678	-19.75	67.169	-10.849
129.333	-35.272	7.763	-93.314	123.329	-20.222	103.606	94.26	13.924	36.89
129.467	-20.314	37.137	-62.159	39.099	144.826	41.849	12.208	20.858	-198.948
129.6	5.196	92.983	-50.599	75.293	39.734	43.842	15.384	6.542	-29.47
129.733	30.024	207.285	-19.946	98.135	-12.927	69.781	28.518	20.79	-12.758
129.867	62.202	121.975	-38.701	59.48	121.808	73.476	10.085	-25.679	219.76
130	72.086	81.479	-22.329	86.107	125.731	21.807	13.421	15.861	-364.471
130.133	87.839	93.25	-47.066	99.761	53.58	51.274	17.714	27.1	-114.219
130.267	102.134	54.338	-124.9	69.844	114.6	-52.41	9.202	49.95	-187.87
130.4	108.283	15.694	-91.739	122.705	57.72	124.401	25.021	95.441	-83.857
130.533	121.462	-2.741	-84.433	32.695	82.933	35.965	7.033	101.809	-122.735
130.667	247.261	66.31	-33.91	94.285	62.974	15.506	18.871	87.234	-86.859
130.8	95.048	66.166	-53.528	125.49	97.509	-48.933	-21.427	48.152	-43.967
130.933	176.682	170.357	24.719	49.171	109.972	30.722	-14.143	56.48	17.721
131.067	31.504	105.976	37.564	71.628	-48.824	122.163	-12.587	34.682	14.962
131.2	19.3	106.387	17.512	61.467	51.352	-2.152	12.909	22.598	-22.167
131.333	46.974	203.171	55.44	21.817	83.121	-11.545	-3.52	53.222	55.881
131.467	182.544	96.674	-17.133	51.214	83.629	-32.771	86.519	71.224	173.621
131.6	55.653	85.899	12.608	69.848	109.919	-38.994	-32.989	22.568	23.229
131.733	77.302	25.798	-5.7	44.832	58.175	-37.217	204.49	73.147	10.735
131.867	16.557	74.177	17.631	33.113	88.137	71.484	14.963	65.439	33.217
132	55.703	52.432	-3.222	21.747	106.279	-24.692	-23.41	-19.306	14.856
132.133	9.783	-45.436	7.68	5.609	65.444	-20.905	21.915	-13.437	42.482
132.267	-146.671	-5.424	-25.525	10.297	42.286	28.752	-111.626	-3.918	-32.584
132.4	-36.115	-23.315	57.489	20.279	9.206	63.201	34.573	32.77	-6.984
132.533	-55.774	-45.477	50.129	-3.69	32.262	65.803	75.601	-17.762	-9.591
132.667	-42.742	15.204	32.658	35.909	16.818	-97.186	92.81	-36.635	52.256
132.8	-10.071	7.828	114.726	-19.555	7.759	10.772	49.046	-36.732	80.284
132.933	165.559	-50.19	46.041	8.718	12.03	22.607	47.147	14.157	77.014
133.067	68.284	-46.843	12.958	-13.142	-2.388	12.663	40.281	17.104	123.011
133.2	30.489	-35.94	17.713	28.672	17.44	55.663	49.42	197.631	126.872
133.333	-31.041	-22.454	24.669	-15.007	-25.428	60.617	-11.02	27.408	-50.663
133.467	-86.187	-19.791	26.826	-2.654	-28.953	7.73	118.752	79.028	106.531
133.6	4.69	-10.667	23.189	12.547	40.883	-3.29	27.908	173.049	39.376
133.733	26.986	38.99	-24.205	-10.458	-10.204	22.076	30.967	1.759	8.785
133.867	50.918	215.388	-7.051	13.665	-16.563	20.628	13.81	104.096	-106.984
134	47.007	105.939	-7.86	11.794	13.414	31.379	35.553	130.136	-6.326
134.133	61.687	155.471	43.083	2.535	-43.205	32.159	1.658	-39.347	10.895
134.267	123.589	95.264	-6.327	-19.309	13.026	41.62	29.312	41.423	25.133
134.4	263.553	107.977	70.702	-9.274	-14.839	65.029	-20.181	30.564	43.238
134.533	182.983	34.251	121.351	9.702	-47.91	105.291	20.28	23.818	-256.262
134.667	153.544	75.657	-2.709	9.966	25.902	111.829	-18.105	20.198	-213.14
134.8	130.02	77.867	32.953	4.05	-6.984	27.626	9.509	41.027	-331.788
134.933	-15.9	48.512	6.168	13.279	-29.478	44.263	-14.664	60.926	-297.439
135.067	-8.076	55.542	24.73	23.524	-14.166	-14.543	-88.989	6.896	-243.576
135.2	8.867	42.066	-10.146	-22.27	-49.197	8.965	-163.965	24.035	-203.634
135.333	45.246	50.578	-101.267	5.738	-69.979	35.911	-153.02	6.412	-6.688
135.467	50.505	13.439	108.312	-8.475	-57.378	-6.261	-195.251	16.686	52.679
135.6	48.073	31.02	-6.954	7.13	-76.708	-15.441	-132.371	76.737	202.247
135.733	53.942	28.216	-73.097	6.653	-83.759	-32.706	-120.039	77.61	125.96
135.867	96.431	-56.399	72.729	-16.474	-17.913	-39.674	-92.141	67.044	145.725
136	36.001	60.785	129.095	17.339	-27.285	-151.826	-95.449	42.052	28.166
136.133	17.122	74.662	39.62	15.911	-7.749	-123.745	-122.88	35.098	78.132
136.267	14.254	26.552	5.724	48.793	29.661	-63.901	-117.386	54.965	36.602
136.4	8.228	-6.396	12.549	37.825	-11.839	-37.61	-18.444	49.623	122.256
136.533	-149.355	-58.94	-3.694	90.734	-3.343	-31.151	-80.853	51.755	237.194
136.667	-122.074	-138.391	-55.497	35.764	25.071	-20.109	-126.19	45.205	120.709
136.8	-285.483	-251.106	-40.858	50.986	76.688	-48.713	-107.043	77.696	238.055
136.933	-335.872	-206.953	-1.448	35.846	98.301	-170.908	-57.231	29.157	237.407
137.067	-367.056	-148.438	-11.346	-7.448	-34.648	-111.671	-17.067	50.168	119.211
137.2	-345.145	-71.523	40.555	49.926	-1.22	-112.156	13.799	9.493	-8.102
137.333	-153.375	-158.935	27.26	44.918	56.51	-129.353	11.409	33.938	-0.811
137.467	-161.273	-43.772	6.475	12.127	36.153	-118.252	31.141	21.816	330.914
137.6	-212.282	-7.893	25.442	41.07	60.78	-103.01	39.661	137.772	5.352
137.733	-205.268	-17.725	105.829	67.155	34.718	-44.691	16.147	-12.944	-0.308
137.867	-270.277	9.437	63.23	31.425	33.023	-52.58	54.387	-67.858	13.025
138	-217.162	52.854	-15.595	64.939	-1.119	-12.564	75.567	53.636	359.904
138.133	-172.23	-117.275	12.19	34.674	-44.227	-16.09	96.016	84.056	121.117
138.267	-236.822	37.589	14.811	40.416	-22.732	-44.516	71.82	111.02	242.668
138.4	-251.201	4.439	52.756	30.367	-18.976	-18.583	77.421	27.648	-121.306
138.533	-181.533	-11.629	-51.683	5.053	-6.456	-42.445	73.514	84.08	237.782
138.667	-108.31	7.426	124.852	42.731	4.06	-11.89	118.241	10.464	122.638
138.8	-149.106	-9.004	39.053	35.554	56.136	7.823	41.894	39.707	124.895
138.933	-66.455	-12.963	117.632	-4.606	44.081	-21.89	92.575	23.177	14.312
139.067	-120.786	-10.333	106.634	44.775	26.875	-96.803	94.304	7.715	-10.881
139.2	-42.411	7.214	58.024	7.58	69.578	-105.803	13.801	28.095	122.546
139.333	-12.831	-17.968	127.197	73.295	61.9	-16.458	47.519	16.864	123.147
139.467	-13.881	-6.92	41.296	45.245	12.882	-15.251	96.265	11.093	-7.255
139.6	-95.623	-24.756	-28.094	89.054	5.35	-17.446	91.497	7.943	120.114
139.733	-187.106	8.609	-49.136	39.861	16.158	85.575	70.58	-21.886	-7.521
139.867	-212.678	-19.463	-54.656	51.251	-22.838	-63.274	22.052	24.142	-11.442
140	-203.429	-29.811	-48.696	52.487	-12.124	16.135	66.655	-6.326	240.657
140.133	-230.341	-85.985	-11.791	39.909	25.702	75.946	87.301	11.348	1.364
140.267	-249.858	-182.153	-28.236	35.689	87.068	-57.473	95.268	-9.781	-9.981
140.4	-270.813	-126.058	-20.309	15.205	59.145	11.804	104.982	-16.162	119.722
140.533	-279.453	-116.438	-13.855	71.819	-27.758	122.738	68.89	7.223	121.13
140.667	-211.288	-166.618	22.18	35.316	31.754	-44.561	86.203	26.676	-16.796
140.8	-159.133	-147.197	-8.233	21.289	138.503	58.133	74.394	13.054	-2.107
140.933	-108.496	-107.046	29.866	3.873	19.48	51.894	45.922	6.329	-0.316
141.067	20.896	-108.729	42.781	46.311	36.216	36.728	49.929	84.443	121.474
141.2	79.278	-146.72	-15.133	52.842	43.728	22.271	25.709	78.38	-121.642
141.333	-2.41	7.15	-34.977	52.377	31.365	142.425	-75.607	85.364	19.925
141.467	-15.939	-13.348	24.651	101.964	66.682	48.252	40.028	29.852	121.385
141.6	39.951	40.154	73.537	67.402	44.707	36.742	46.862	44.729	123.091
141.733	31.781	55.706	53.226	79.224	26.694	-21.489	42.605	6.956	6.557
141.867	143.439	-16.653	52.426	102.038	34.056	64.213	92.424	29.83	124.28
142	106.811	-20.71	-21.935	118.918	81.972	59.132	39.19	35.406	-31.179
142.133	93.48	-10.437	-12.345	61.395	25.167	15.042	40.621	50.973	35.544
142.267	106.924	-70.242	66.361	42.926	-92.18	95.075	-26.732	50.712	-7.479
142.4	85.86	-3.161	187.038	31.576	84.437	-60.737	20.86	27.013	-12.434
142.533	62.291	10.741	-17.029	100.238	-2.25	25.806	-14.444	21.385	-11.311
142.667	72.195	32.88	-17.578	24.097	77.062	87.222	52.691	8.92	14.62
142.8	38.251	34.371	-16.239	54.255	29.652	96.771	23.715	2.462	16.497
142.933	79.63	22.377	-25.952	43.934	131.902	44.927	51.162	7.47	-24.817
143.067	32.979	4.866	19.811	63.989	-8.934	24.426	4.918	-8.138	18.538
143.2	50.113	15.641	2.494	104.898	27.308	4.336	41.69	-13.501	-8.667
143.333	51.574	12.924	-16.376	31.688	111.246	28.055	9.05	9.657	-15.226
143.467	81.01	65.567	40.398	63.829	62.539	-8.545	14.079	-6.152	43.648
143.6	68.015	52.776	27.862	86.851	47.561	81.289	-20.884	-19.606	-41.233
143.733	62.072	105.135	-13.1	-24.303	51.411	42.488	16.906	23.59	35.476
143.867	111.417	188.563	-6.622	10.994	33.801	11.685	-17.394	6.262	-1.885
144	23.704	91.156	3.795	45.765	42.209	26.501	19.738	25.086	104.555
144.133	162.591	62.966	-132.476	8.795	24.255	-2.029	-5.775	16.566	3.774
144.267	51.566	37.604	-106.216	7.634	36.349	-3.196	42.828	5.808	2.033
144.4	47.41	50.966	-183.181	-15.83	-14.49	-9.041	-12.479	-5.728	37.706
144.533	77.2	70.95	-130.647	-8.897	45.733	20.486	90.106	-32.069	49.939
144.667	76.112	67.876	-85.388	31.834	24.912	34.943	20.95	-10.08	81.803
144.8	78.492	27.838	-76.897	5.161	20.618	9.333	57.826	-2.101	29.015
144.933	32.512	57.046	-78.976	22.2	1.75	4.992	27.045	-31.964	-3.808
145.067	32.15	75.559	-61.698	29.466	30.115	-28.159	-57.787	16.771	26.622
145.2	78.036	73.962	-16.764	13.254	68.065	39.927	-12.629	-12.606	25.491
145.333	-27.068	111.308	-134.658	24.915	51.033	94.618	34.812	-18.037	129.161
145.467	42.242	69.436	73.182	7.799	52.669	33.279	19.674	10.16	95.095
145.6	72.705	64.798	-8.838	5.931	50.143	11.997	13.611	0.46	-50.656
145.733	70.737	42.662	-25.607	20.335	58.276	53.188	22.939	6.328	19.819
145.867	35.312	13.94	4.388	105.832	25.521	45.406	38.916	-4.367	112.969
146	88.109	9.875	12.754	146.211	43.279	51.636	39.899	-5.428	-67.927
146.133	54.925	27.894	-4.247	92.974	50.903	23.928	45.175	-5.668	31.816
146.267	60.743	22.8	6.106	72.18	96.088	12.237	42.851	-6.792	5.692
146.4	66.984	11.805	-24.063	78.729	65.879	33.802	57.788	1.782	-12.731
146.533	-10.091	17.415	5.311	102.157	71.306	54.299	8.103	-3.078	120.818
146.667	55.369	11.142	7.573	37.96	83.675	41.563	40.532	10.501	15.781
146.8	84.114	9.077	16.601	65.385	44.458	64.723	72.401	-4.924	7.874
146.933	34.416	29.565	-8.46	40.941	-11.634	80.517	112.232	-2.379	82.625
147.067	86.64	-31.891	6.179	12.11	44.819	53.983	64.891	5.301	11.952
147.2	81.489	-37.235	15.023	81.088	60.751	91.115	95.305	-22.348	20.572
147.333	15.759	34.739	-16.409	35.664	65.26	92.451	115.394	-0.398	69.835
147.467	32.189	114.614	-98.978	36.398	77.542	53.926	117.646	12.583	75.017
147.6	26.572	71.589	105.405	52.525	44.001	37.407	78.374	-2.128	48.899
147.733	69.822	34.349	6.074	84.865	111.535	72.327	-34.504	3.118	81.412
147.867	65.592	47.204	3.935	86.612	-35.699	37.227	51.863	12.747	69.419
148	148.297	22.024	14.482	78.042	78.784	49.903	65.736	-14.013	20.801
148.133	-62.626	-84.291	-8.64	22.188	48.231	59.253	69.746	6.297	49.048
148.267	17.529	145.239	-13.86	75.032	85.147	95.126	59.006	-11.488	23.105
148.4	48.785	35.133	-2.24	24.432	112.695	84.791	41.304	-4.179	-30.63
148.533	82.356	194.585	5.099	-22.975	60.846	87.55	40.216	8.775	-63.592
148.667	104.072	16.528	7.587	-16.628	188.433	58.013	-13.128	-6.393	10.684
148.8	80.524	14.629	3.42	52.343	-27.658	39.308	15.758	2.994	175.335
148.933	90.466	54.578	-8.696	-6.476	63.618	88.129	34.573	26.484	27.48
149.067	74.968	39.242	8.163	12.364	156.251	17.925	25.831	-3.093	-3.292
149.2	27.869	-69.755	-0.701	13.601	58.763	2.511	75.482	8.866	-91.251
149.333	44.093	136.002	136.403	12.732	32.578	26.856	68.346	-4.376	30.849
149.467	149.98	-6.923	-147.104	10.968	17.379	-6.401	77.6	15.326	39.97
149.6	77.493	4.361	2.966	2.333	91.825	2.602	86.165	-20.244	173.69
149.733	55.749	34.38	10.708	-36.31	47.396	28.852	40.517	0.836	102.113
149.867	62.472	-7.971	7.13	-15.904	63.358	-4.03	66.471	2.726	7.433
150	85.798	15.521	1.416	23.577	102.202	12.818	35.85	6.104	-18.148
150.133	67.393	-16.328	-3.505	48.821	119.983	-8.419	18.431	3.664	-71.947
150.267	53.028	26.287	0.742	32.779	78.831	14.349	22.539	-0.963	43.216
150.4	93.752	-15.104	0.158	23.939	79.885	-3.513	72.152	-11.147	13.916
150.533	78.528	0.549	-2.549	27.738	106.024	-20.862	57.054	2.195	44.59
150.667	31.739	2.191	27.208	35.023	98.48	-6.879	29.838	-13.701	-6.437
150.8	122.248	-14.444	-25.447	-161.89	88.792	12.502	-24.879	-7.031	127.699
150.933	70.12	-25.551	-4.674	-453.629	78.817	3.071	24.833	4.946	-2.897
151.067	91.019	12.835	28.023	-387.833	100.911	30.3	14.658	3.172	-22.54
151.2	57.6	10.339	1.201	-418.933	94.91	31.497	-17.887	12.338	-9.663
151.333	219.684	-47.856	8.62	-315.05	50.979	8.263	19.634	1.685	-16.421
151.467	30.697	5.462	-4.299	-189.951	82.955	10.108	47.307	9.951	11.812
151.6	70.987	59.87	-1.757	-184.093	53.195	19.642	60.184	-3.689	89.624
151.733	-46.739	65.332	14.023	-100.162	53.05	60.426	18.715	-5.741	18.233
151.867	96.31	-5.393	12.624	-63.382	48.349	9.114	39.987	2.561	-5.484
152	146.522	27.048	130.805	-142.501	93.609	-5.299	17.885	-10.397	32.715
152.133	37.034	-5.501	-83.869	121.664	37.139	28.453	51.574	-5.011	-26.343
152.267	74.304	20.027	2.199	-95.111	42.866	-7.517	183.068	-4.337	4.018
152.4	78.288	132.252	-1.7	55.771	103.423	-6.949	97.048	3.679	-5.482
152.533	102.997	260.617	3.834	53.366	50.118	92.204	75.578	3.734	-22.317
152.667	78.855	112.982	8.943	82.705	74.826	7.093	-58.844	-0.246	-75.844
152.8	75.49	9.107	-3.203	76.603	71.639	38.435	165.516	-11.244	103.143
152.933	109.456	10.531	-27.562	62.686	15.75	27.019	57.303	1.371	8.263
153.067	69.535	37.158	-48.076	47.801	9.514	2.954	75.629	1.293	65.167
153.2	75.517	5.843	-118.848	64.832	68.59	13.898	76.607	-3.502	-20.053
153.333	-3.453	19.439	-130.025	53.174	-9.394	-3.976	57.089	-6.758	20.675
153.467	84.697	36.896	-104.078	27.482	69.097	18.45	107.524	4.896	-14.773
153.6	31.461	-14.199	-128.606	24.141	54.005	16.948	70.311	-6.005	0.33
153.733	32.588	28.481	-130.811	16.108	69.495	-3.325	68.103	5.294	-8.46
153.867	22.148	-22.042	-143.24	43.42	50.677	-7.196	45.741	6.538	-12.017
154	19.507	20.456	-162.225	23.76	39.886	-38.357	46.143	-9.747	-26.717
154.133	65.112	-5.263	-157.393	14.638	35.56	5.526	57.817	10.608	-10.103
154.267	11.126	-14.904	-75.209	44.192	73.723	9.206	21.323	-13.551	-49.732
154.4	62.065	-16.61	-137.522	-4.601	71.69	29.728	30.934	-7.715	8.93
154.533	62.042	26.141	-94.915	3.515	74.349	19.956	40.856	6.84	-22.093
154.667	67.836	-13.199	-73.893	115.877	86.622	-9.119	15.99	-13.461	37.868
154.8	85.87	2.09	-44.886	117.781	32.129	28.75	25.189	-3.712	109.822
154.933	70.738	-7.652	-69.321	314.424	73.665	10.302	18.876	-2.252	-102.873
155.067	104.054	-16.873	-62.586	36.327	37.857	-12.447	7.87	3.179	36.762
155.2	58.908	6.394	-27.644	231.634	31.563	-3.632	4.764	-11.183	52.415
155.333	86.345	43.243	-6.564	-79.783	99.869	-13.114	9.419	-1.85	14.901
155.467	52.576	-12.179	-53.039	235.288	78.202	27.269	3.785	-14.898	-98.217
155.6	57.03	11.534	-55.234	54.124	82.803	2.345	20.637	-41.596	-14.097
155.733	56.455	11.119	-103.64	-13.702	51.966	-4.375	-17.439	-49.309	136.674
155.867	72.144	-13.964	-56.692	-21.257	60.084	22.245	-21.333	-58.819	49.488
156	69.415	7.512	-58.007	-66.052	77.941	29.34	-29.589	-69.926	21.003
156.133	51.052	15.159	-60.48	-27.656	84.782	15.987	-15.949	-77.099	52.059
156.267	54.348	9.958	-30.098	-14.494	64.929	1.235	-7.867	-104.228	27.517
156.4	85.272	16.378	-48.696	11.323	57.032	-9.468	-45.579	-57.93	13.523
156.533	65.699	-17.135	-38.343	69.526	112.809	-14.627	26.794	-91.748	55.493
156.667	25.269	7.478	-17.347	31.226	49.992	-9.655	14.563	-98.417	66.374
156.8	30.745	21.986	-18.972	48.081	70.359	-1.845	-53.891	-97.764	-109.863
156.933	85.285	3.313	43.006	25.693	74.802	27.767	-7.067	-45.213	75.057
157.067	84.331	20.418	36.671	236.103	63.085	-14.116	-11.652	-66.652	190.72
157.2	90.782	-6.466	5.594	37.355	88.503	-19.559	8.362	-40.215	23.095
157.333	67.541	28.175	-56.931	9.036	50.261	7.367	-54.592	12.855	7.475
157.467	50.511	20.3	-2.571	-10.479	61.864	-28.711	-27.099	-95.91	25.044
157.6	56.089	30.067	-48.559	-17.107	31.596	-6.368	-81.023	-100.112	23.453
157.733	42.779	-8.064	8.297	2.382	14.596	-31.7	17.231	-112.331	29.471
157.867	26.552	18.987	-41.806	-42.95	76.661	23.038	5.026	-67.506	13.81
158	51.618	26.766	-58.791	66.702	28.575	-11.482	15.21	-69.896	24.005
158.133	43.409	-4.076	-28.129	93.5	35.356	10.253	14.746	-89.151	13.919
158.267	58.366	-10.608	-61.765	62.854	75.038	-17.668	33.303	-98.943	3.18
158.4	47.499	-16.267	-54.678	59.206	39.47	50.963	-3.379	-120.514	-20.034
158.533	109.567	14.945	-40.207	-49.942	53.962	4.975	28.045	-203.797	-100.761
158.667	48.719	20.716	-40.995	24.528	89.97	50.45	27.731	-183.445	-222.226
158.8	-6.869	-0.618	-67.243	-8.715	34.02	2.986	5.271	-204.271	-208.868
158.933	20.425	26.503	-26.135	34.439	64.065	15.709	23.709	-163.335	-114.909
159.067	42.954	-22.073	-32.888	78.429	79.487	36.847	123.444	-202.363	-93.342
159.2	22.198	10.338	-60.343	66.328	71.14	40.132	-5.826	-181.429	-81.505
159.333	44.61	-18.396	-41.303	63.995	53.514	16.412	5.186	-205.612	-85.092
159.467	119.027	-6.315	-39.759	10.707	68.727	28.39	-22.161	-196.905	-77.694
159.6	124.024	13.869	-43.745	24.901	57.941	12.898	-27.285	-272.028	-64.056
159.733	29.103	22.252	-29.187	23.01	63.903	-23.169	-39.511	-242.829	-57.553
159.867	154.498	-122.335	-25.572	72.126	30.934	37.211	-39.311	-223.703	-28.246
160	89.154	-556.193	26.991	-104.008	37.701	35.506	-24.245	-258.443	-53.826
160.133	51.844	-356.316	-2.914	7.331	78.272	28.945	-11.026	-215.564	-1.322
160.267	85.696	-43.627	-3.035	161.195	55.834	11.665	14.445	-173.539	-32.294
160.4	11.215	-38.338	-11.059	46.777	87.477	14.546	-5.924	-296.556	-106.124
160.533	54.083	-67.341	22.079	29.163	55.265	11.694	-84.839	-273.74	-216.929
160.667	65.1	-27.206	8.295	55.475	76.392	-4.023	94.021	-224.717	96.072
160.8	16.169	-12.886	30.153	34.558	49.276	6.923	-11.92	-301.898	-61.282
160.933	36.804	-62.473	21.368	11.6	75.305	8.607	-21.246	-420.817	12.17
161.067	20.136	-232.189	35.94	-27.26	46.443	12.013	-45.152	-273.907	20.379
161.2	60.734	53.829	59.028	-36.233	81.022	-11.298	-8.006	-334.685	21.053
161.333	95.441	-69.865	60.513	-6.674	368.048	-7.899	44.493	-329.815	242.911
161.467	99.588	-11.498	12.647	-24.461	157.028	-33.099	-57.812	-246.492	14.903
161.6	98.421	19.056	33.905	18.377	44.884	-5.896	56.716	-113.754	149.357
161.733	58.903	-8.546	28.903	-82.84	63.873	-24.386	25.099	-28.53	-92.476
161.867	90.379	-14.783	13.416	44.505	51.196	-15.946	26.885	-3.589	26.09
162	82.541	7.15	16.397	33.062	68.215	4.274	47.561	-19.858	-3.345
162.133	118.632	-18.045	41.829	42.492	37.337	-10.108	51.27	-21.361	17.886
162.267	76.552	12.674	16.957	32.626	25.545	-30.591	44.147	-30.717	-407.195
162.4	65.131	8.684	21.969	-48.566	109.461	-8.384	45.158	17.221	-295.228
162.533	32.033	-6.991	48.243	-94.712	63.444	-20.039	13.465	142.37	-281.58
162.667	42.141	-16.42	78.003	-249.785	114.274	-80.88	32.878	188.88	-177.389
162.8	62.527	9.492	5.706	-363.96	58.391	-163.714	84.95	209.229	-67.096
162.933	-19.393	-39.432	49.103	-455.416	65.969	-229.98	59.44	151.554	-38.039
163.067	65.047	22.945	22.202	-327.46	64.778	-139.313	79.454	110.9	16.528
163.2	31.941	14.215	26.595	-168.349	88.97	-94.905	62.982	88.071	-44.831
163.333	33.25	-29.547	72.372	-114.752	78.687	-85.178	70.892	60.532	17.029
163.467	20.702	15.784	26.724	-98.643	87.898	-106.337	31.256	102.785	-5.81
163.6	41.89	16.734	9.548	-25.935	104.763	-104.24	-7.59	230.065	19.333
163.733	72.38	22.68	21.911	-76.251	42.439	-126.273	33.032	43.089	86.141
163.867	75.625	51.987	38.851	-118.671	70.824	-82.568	7.383	164.188	56.715
164	16.768	15.074	-53.651	-30.825	94.51	-55.816	29.154	136.639	101.462
164.133	60.413	23.446	28.947	-5.271	72.411	5.091	79.007	137.445	26.451
164.267	68.962	42.278	37.226	-39.409	38.344	-18.845	48.155	141.408	74.531
164.4	58.88	-5.285	78.633	55.299	70.651	4.748	26.9	253.158	24.877
164.533	59.615	59.369	144.236	48.795	114.568	5.513	-13.966	215.36	7.784
164.667	19.412	125.284	24.637	78.742	145.98	13.033	23.449	94.708	-25.315
164.8	49.878	-51.596	-92.051	19.549	79.809	2.5	49.6	18.207	56.112
164.933	87.224	30.673	61.031	-86.643	-404.508	1.777	6.179	146.758	-45.776
165.067	104.178	67.683	12.04	-93.971	-485.991	-24.83	93.058	-31.504	85.968
165.2	40.278	60.667	134.44	-35.333	-110.427	-30.706	70.331	50.899	68.023
165.333	98.664	55.03	-77.156	-14.53	-32.149	97.585	35.4	72.125	5.647
165.467	47.349	53.085	-7.085	-28.304	12.365	-31.572	31.787	140.185	137.184
165.6	48.838	79.423	78.212	-21.125	9.752	-11.149	18.683	-12.422	5.007
165.733	62.103	15.868	-94.005	5.825	-19.182	-30.095	25.862	74.027	43.002
165.867	98.396	44.648	81.782	39.882	14.949	-67.085	49.445	-15.428	-25.294
166	21.907	124.113	64.54	40.383	6.084	-38.389	14.694	4.792	87.259
166.133	20.01	48.154	37.393	18.215	4.209	-31.25	59.226	12.527	73.25
166.267	37.941	-70.274	27.45	27.728	43.985	-6.053	42.58	15.45	19.886
166.4	10.722	44.142	42.611	30.123	91.738	24.337	24.457	-9.806	60.74
166.533	12.348	40.821	46.703	9.995	81.03	15.305	22.96	-70.95	36.431
166.667	17.071	62.277	35.977	-18.784	71.148	44.846	90.821	-150.328	90.586
166.8	-9.341	92.077	14.351	-4.274	94.567	34.096	67.509	-110.235	187.165
166.933	20.436	49.755	28.787	-16.867	114.183	44.528	79.75	37.79	24.899
167.067	1.491	51.385	6.73	-18.305	43.122	46.188	149.077	-119.215	30.757
167.2	12.293	41.114	10.763	-4.966	94.276	150.273	-51.901	-180.341	43.827
167.333	-6.906	15.507	9.796	48.683	79.749	-19.087	46.543	-200.249	9.422
167.467	-10.381	22.033	10.399	89.838	67.827	66.142	34.465	1.569	-6.525
167.6	-3.44	16.592	22.06	-33.22	58.793	42.113	48.672	-47.375	21.161
167.733	19.636	-23.508	-64.503	154.063	88.056	40.443	-4.553	23.483	1.605
167.867	-4.751	-43.122	135.272	114.113	91.927	12.188	-6.776	-5.148	-8.661
168	-2.319	42.232	59.049	93.352	84.08	14.29	22.02	9.879	7.043
168.133	-20.876	48.754	47.406	34.469	26.357	67.692	27.666	110.131	-33.13
168.267	-0.824	6.658	71.931	185.239	70.938	24.463	-9.52	-119.13	14.528
168.4	-3.447	39.642	76.558	107.017	39.274	6.559	7.113	-24.656	2.246
168.533	17.344	10.734	39.739	105.042	71.358	40.104	21.636	14.175	-19.912
168.667	10.612	47.809	63.222	-5.247	67.779	33.835	20.231	-2.828	40.818
168.8	-15.801	39.258	9.386	146.025	32.651	12.988	13.036	-12.382	-14.005
168.933	-2.725	-6.859	-6.321	143.398	57.847	-10.126	29.987	-2.828	9.017
169.067	-1.754	16.338	23.071	105.28	50.105	23.401	46.899	14.815	-8.347
169.2	-2.571	-2.601	21.429	-149.983	38.986	14.736	29.657	-35.999	-9.721
169.333	-0.906	11.723	59.409	-607.31	10.825	33.794	117.062	-20.005	-20.432
169.467	2.604	-4.033	75.034	-546.941	62.051	20.272	47.279	42.119	23.033
169.6	-0.715	7.657	30.46	-482.296	4.961	24.614	65.901	22.095	28.369
169.733	-4.867	4.248	32.317	-231.017	20.097	42.441	44.344	51.48	-29.801
169.867	7.219	125.429	27.309	-231.166	33.771	22.672	23.709	151.947	-5.491
170	-1.195	4.719	60.085	-133.813	73.07	4.649	5.228	27.337	26.246
170.133	-5.315	-124.622	36.35	-122.849	26.451	30.802	-15.877	44.428	-12.69
170.267	-10.145	16.007	5.391	-121.796	60.872	36.917	-3.812	97.619	31.431
170.4	-8.478	17.213	-0.603	-111.776	52.649	24.894	25.955	-2.503	15.626
170.533	11.835	12.01	-22.517	-140.567	22.315	45.632	-19.545	39.283	23.967
170.667	6.666	-19.205	-9.348	-189.268	31.723	65.359	-14.173	170.462	-104.09
170.8	-12.202	-16.918	26.121	-13.059	19.922	46.451	11.401	-51.443	-316.837
170.933	4.254	13.141	20.825	-63.322	12.949	36.609	27.799	23.806	-61.001
171.067	4.255	1.843	6.131	-22.25	77.234	43.01	66.237	133.651	28.555
171.2	-6.607	-19.722	62.859	22.5	49.032	10.313	51.415	-87.745	12.93
171.333	4.165	-19.717	21.185	17.597	58.913	-12.957	36.35	24.716	19.38
171.467	-30.298	-14.977	79.32	1.84	62.69	19.704	8.393	102.893	46.226
171.6	-32.409	19.675	47.78	-9.706	60.581	23.157	52.79	43.715	-16.707
171.733	-1.944	-18.42	58.042	-16.645	27.528	-13.105	56.305	54.845	81.293
171.867	-45.24	-10.113	30.079	-5.977	48.431	-24.67	40.018	55.258	-68.783
172	-3.886	-9.506	53.851	-47.415	64.015	33.347	174.485	31.609	39.936
172.133	-25.093	57.166	4.794	15.285	29.96	12.721	-64.459	42.304	79.131
172.267	-20.922	11.968	23.18	-23.328	70.299	35.03	152.76	62.942	52.067
172.4	-5.333	16.46	3.195	-37.445	38.483	17.419	-93.874	-5.215	39.102
172.533	-18.599	-96.662	-21.814	-48.942	38.927	12.206	-7.333	20.48	176.29
172.667	-24.944	21.358	-18.586	-328.215	30.516	-15.717	9.368	-7.423	22.362
172.8	-6.116	-23.565	11.31	-141.234	71.7	10.126	7.879	25.674	186.449
172.933	39.911	13.749	31.25	-472.627	118.602	10.94	18.941	-24.467	-90.985
173.067	9.296	-6.233	12.022	-216.371	56.338	17.591	-6.319	-21.93	131.347
173.2	7.6	-3.986	54.044	-210.607	59.066	-6.097	9.365	25.189	59.716
173.333	-38.023	145.22	19.439	-257.135	60.294	-14.683	33.109	93.687	-14.283
173.467	43.007	-52.193	23.604	-270.946	13.393	7.583	66.334	73.809	18.964
173.6	-26.055	12.911	70.581	-287.529	42.071	-28.878	167.974	54.349	-16.392
173.733	-11.463	15.652	46.807	-464.148	75.365	-4.492	55.021	34.536	36.975
173.867	-82.342	-111.212	60.262	-153.333	82.001	19.91	41.669	30.661	14.575
174	-163.273	-14.3	50.485	-463.25	57.816	24.646	34.89	-4.324	133.526
174.133	-112.019	15.987	26.261	-155.671	-25.545	11.954	68.402	27.038	-88.156
174.267	-134.113	15.797	21.908	-5.124	3.592	-16.493	47.635	9.886	90.256
174.4	-158.582	-15.83	26.865	-156.119	-12.836	91.61	17.016	-201.157	-76.706
174.533	-92.785	4.575	-16.321	-2.872	39.583	34.32	53.892	-189.959	-6.271
174.667	10.789	144.721	18.106	-155.432	38.544	-53.421	64.416	-87.692	5.025
174.8	-154.81	-172.328	12.144	154.127	7.035	106.929	-68.152	16.441	-32.444
174.933	-46.724	31.054	-17.551	-3.393	36.016	-64.758	143.426	9.077	-7.293
175.067	-29.61	-5.184	34.308	-310.099	65.125	12.781	4.708	20.865	-15.799
175.2	-37.263	10.113	13.086	154.882	116.768	24.596	-11.442	-5.518	7.374
175.333	-22.268	-19.522	25.918	3.552	52.909	27.208	-79.92	10.687	131.022
175.467	-32.657	104.704	33.25	155.04	85.445	18.284	41.558	5.128	30.645
175.6	-27.694	13.472	-7.467	-155.541	57.782	-18.902	95.74	18.521	-55.838
175.733	-46.895	-115.328	55.157	155.551	24.64	-11.945	43.852	11.5	32.444
175.867	-30.973	-20.701	37.959	4.244	5.246	13.372	80.638	5.983	23.564
176	140.871	142.017	98.92	6.356	6.208	6.502	65.795	5.148	22.322
176.133	-125.34	-192.911	13.415	-155.588	15.032	-9.211	50.099	23.406	9.698
176.267	126.204	-28.953	11.515	155.616	4.046	7.3	52.563	-24.594	95.641
176.4	135.569	-118.661	29.257	-2.808	13.477	6.747	33.825	41.494	-89.064
176.533	86.258	-139.946	-9.383	-155.523	25.996	-3.482	50.159	21.795	-34.4
176.667	56.704	-141.346	37.547	4.063	13.005	12.403	32.687	29.699	19.278
176.8	51.519	-105.87	26.05	-3.33	8.612	138.928	52.009	92.423	13.285
176.933	62.489	-134.528	-14.45	155.45	12.418	-79.426	12.161	110.541	3.055
177.067	69.953	-126.028	15.766	-155.522	54.497	29.83	-3.716	73.973	-7.123
177.2	111.334	-96.581	22.636	-3.731	-8.209	52.352	-8.308	54.282	-1.413
177.333	-29.16	5.886	31.876	-5.155	62.778	18.041	-15.019	56.566	-41.477
177.467	138.168	-148.466	9.114	-3.384	104.126	3.647	4.155	14.481	153.517
177.6	49.107	77.082	-11.346	7.187	52.581	-12.002	52.671	36.932	4.998
177.733	35.164	-39.201	-1.774	-2.202	30.39	-4.35	132.719	10.856	-28.183
177.867	62.175	-139.536	49.562	8.78	73.394	-2.827	-2.15	29.226	-120.323
178	52.748	-2.203	23.461	3.763	-1.398	8.665	18.359	35.19	-1.685
178.133	60.698	7.829	19.751	155.755	85.264	-36.224	41.727	-1.804	22.223
178.267	13.766	-32.681	0.617	7.955	57.597	19.19	8.024	19.777	9.334
178.4	75.137	6.311	7.298	-5.221	35.775	3.803	13.481	-2.518	-20.897
178.533	19.611	45.519	40.653	-0.885	25.53	21.143	12.694	-6.874	109.441
178.667	-16.004	140.718	156.392	-11.526	60.028	-21.38	-18.553	-5.336	-132.604
178.8	34.674	-95.216	35.521	156.344	79.639	3.259	27.681	-8.046	-41.288
178.933	43.251	20.304	24.615	-5.761	47.403	-5.531	7.206	23.343	-25.276
179.067	39.199	26.576	26.682	-7.11	34.04	27.91	-8.95	-21.959	34.298
179.2	14.685	11.104	42.893	306.846	102.683	-14.454	12.971	9.31	-49.34
179.333	52.539	29.576	-14.547	-2.414	31.502	-20.915	-10.858	-3.498	8.362
179.467	19.865	25.771	13.589	-4.523	89.56	-27.532	-11.801	-11.259	22.081
179.6	-14.401	13.626	-32.427	155.214	65.51	-5.605	18.124	-10.069	44.296
179.733	43.596	49.456	-39.718	9.508	52.66	16.908	-101.104	2.979	-130.171
179.867	33.037	-2.571	-56.602	2.615	95.815	15.693	121.87	-10.885	-28.867
180	41.935	273.482	-2.709	309.822	63.668	18.667	-104.171	-19.735	-11.432
180.133	95.993	-208.781	-7.259	157.65	45.824	-4.647	124.421	20.115	-22.019
180.267	80.066	271.4	182.774	100.182	352.325	72.504	350.201	271.996	153.77
180.4	487.033	487.858	423.23	505.421	416.28	256.199	361.233	357.003	212.794
180.533	462.483	500.816	393.246	591.073	415.174	186.626	234.42	382.882	374.654
180.667	302.534	401.291	350.129	504.332	395.333	203.967	357.352	358.05	243.142
180.8	374.502	459.409	335.921	582.099	447.026	231.436	372.455	472.337	269.909
180.933	439.705	540.202	283.533	615.566	433.726	205.202	399.258	372.667	269.113
181.067	387.357	462.982	181.545	578.996	306.973	155.634	366.214	355.416	281.134
181.2	399.14	507.425	34.132	445.784	341.304	208.336	319.448	381.967	390.404
181.333	487.149	557.186	214.435	485.105	223.674	95.275	290.664	364.789	364.136
181.467	276.073	423.995	106.179	549.643	285.863	139.824	242.611	411.747	350.124
181.6	326.75	193.578	-23.755	518.688	176.558	91.059	171.489	232.328	283.616
181.733	349.932	690.633	64.396	536.976	184.601	78.812	196.055	101.381	279.172
181.867	312.759	284.947	42.781	347.808	194.174	57.769	175.411	229.786	254.982
182	374.986	209.615	55.063	264.165	203.688	59.84	264.74	210.036	270.775
182.133	368.289	83.706	132.354	240.443	166.515	75.819	186.777	291.984	249.003
182.267	316.691	132.553	67.181	287.36	131.927	25.291	223.277	244.974	264.853
182.4	332.519	103.464	197.462	300.84	156.8	36.804	253.904	244.425	273.579
182.533	342.982	132.163	76.223	279.461	160.828	97.567	278.293	305.708	218.496
182.667	286.57	86.252	141.299	301.807	170.876	37.76	318.126	222.081	327.138
182.8	490.512	92.583	42.44	264.282	127.434	16.103	216.99	254.732	393.981
182.933	408.423	242.488	93.909	75.138	119.63	9.504	303.736	223.741	400.591
183.067	381.567	248.85	93.776	292.965	109.504	-4.127	249.99	253.575	377.453
183.2	422.132	284.65	83.666	303.409	181.872	15.839	240.883	181.306	292.61
183.333	355.45	356.445	62.774	328.59	161.007	55.335	219.91	182.999	533.2
183.467	348.424	321.516	46.96	476.432	147.638	6.766	355.132	158.503	374.578
183.6	377.204	301.618	55.375	273.443	148.834	8.428	201.93	171.511	463.873
183.733	353.928	328.002	87.242	355.717	139.86	34.026	238.834	166.477	363.802
183.867	298.095	317.571	-196.893	364.539	95.546	39.303	142.548	185.138	350.781
184	284.643	346.151	-539.278	314.55	20.811	49.368	233.138	62.134	307.547
184.133	294.748	276.089	-376.79	274.441	-41.196	44.069	239.827	61.963	294.016
184.267	228.182	229.819	-111.19	286.609	73.005	33.432	271.126	28.712	261.736
184.4	210.637	251.76	-113.355	193.259	117.617	-14.646	274.594	50.245	407.054
184.533	245.85	330.236	-25.874	191.021	171.315	33.109	255.136	19.531	377.406
184.667	237.974	197.404	-47.698	263.109	136.05	55.954	176.826	-5.127	369.933
184.8	235.854	428.679	-9.919	170.713	156.774	48.401	203.599	-235.21	317.392
184.933	264.924	329.512	-18.417	243.077	137.681	56.143	256.2	-498.539	343.244
185.067	253.769	285.611	-41.975	163.973	113.31	101.875	78.578	-434.355	255.179
185.2	294.077	240.964	-15.833	162.677	138.776	52.588	144.259	-156.528	373.346
185.333	277.837	227.294	22.771	238.731	96.985	13.962	264.459	-7.262	326.224
185.467	162.317	153.954	7.239	229.636	123.309	82.002	207.059	17.378	317.768
185.6	226.213	170.015	-32.927	212.505	137.552	39.753	242.259	37.67	311.521
185.733	210.62	172.51	49.477	160.796	124.238	52.023	214.939	85.649	302.575
185.867	236.711	119.467	22.709	144.645	134.336	15.811	348.77	129.902	265.223
186	228.485	126.284	71.844	149.696	125.727	9.821	194.197	72.25	298.92
186.133	210.945	122.528	74.413	160.488	123.044	7.218	253.884	-1.094	287.987
186.267	268.494	84.252	44.304	173.784	154.451	10.903	173.634	48.78	287.543
186.4	278.384	52.249	97.913	128.035	136.505	-31.002	218.3	-13.629	282.376
186.533	214.094	94.48	48.802	131.448	140.203	55.739	160.239	-6.918	324.64
186.667	141.924	126.52	-26.389	133.837	74.403	15.238	148.005	28.598	332.044
186.8	330.868	-4.101	173.139	54.251	73.76	-4.245	-35.919	25.362	316.371
186.933	215.237	238.847	95.65	132.955	173.318	-7.934	136.388	57.903	340.57
187.067	225.59	53.389	65.339	66.579	73.547	13.233	135.478	65.059	328.012
187.2	204.927	186.747	95.359	79.573	69.742	20.55	155.628	34.108	344.128
187.333	231.931	154.077	-33.408	108.173	128.091	126.262	203.015	29.792	308.219
187.467	290.05	235.079	172.537	81.404	93.305	35.891	190.096	43.56	377.762
187.6	117.33	246.574	58.669	118.573	72.751	33.657	199.413	8.908	340.23
187.733	197.283	237.525	46.534	115.35	88.416	8.299	323.06	68.961	352.838
187.867	232.731	198.656	19.987	106.556	51.161	10.231	232.252	30.309	282.282
188	146	272.231	15.232	115.185	76.319	-78.242	234.308	79.802	255.604
188.133	313.581	192.705	-47.49	170.568	38.229	23.838	186.009	74.308	250.132
188.267	201.674	85.076	120.497	196.278	67.54	7.197	122.669	136.152	307.248
188.4	200.178	219.199	171.553	205.325	43.037	17.604	185.778	138.485	207.068
188.533	226.576	139.057	68.531	179.033	75.603	13.638	57.053	57.287	267.492
188.667	205.146	156.119	55.435	149.333	99.974	4.906	203.868	16.798	291.2
188.8	125.658	77.997	-17.197	206.806	74.79	-7.091	197.877	56.386	279.145
188.933	181.719	163.869	30.247	194.091	93.27	16.368	220.291	11.298	275.79
189.067	165.033	104.89	4.744	137.007	104.654	-1.017	212.075	52.402	274.614
189.2	250.57	146.518	30.219	107.149	100.998	-6.71	217.848	55.854	293.989
189.333	217.826	160.098	4.754	116.976	81.467	18.667	161.407	33.031	261.691
189.467	198.634	166.601	-6.466	78.929	91.373	4.069	190.04	65.588	259.596
189.6	159.654	194.695	21.594	112.017	120.455	6.252	185.775	26.443	351.348
189.733	247.193	102.062	-2.232	166.081	71.099	-23.114	146.726	57.579	235.349
189.867	292.82	272.71	6.05	107.109	74.389	13.399	119.625	60.2	198.495
190	295.043	137.104	39.735	126.07	126.625	11.379	112.299	66.721	279.697
190.133	293.399	137.011	5.836	85.92	116.338	115.569	42.16	4.702	288.487
190.267	148.133	275.168	24.59	171.543	75.953	-10.229	19.828	6.655	293.495
190.4	292.684	137.033	48.465	133.03	54.108	-117.96	26.675	-7.38	246.765
190.533	292.645	274.378	49.184	129.998	81.597	16.414	15.218	55.28	204.174
190.667	146.203	3.104	66.368	154.884	75.799	-5.591	51.668	32.477	201.946
190.8	146.767	-11.033	83.152	149.663	84.618	5.357	82.454	76.497	208.669
190.933	146.321	139.497	23.799	187.853	34.632	14.469	48.287	10.98	210.812
191.067	292.325	-10.543	39.801	114.909	49.882	85.497	115.363	67.181	239.447
191.2	2.62	0.727	27.864	185.826	84.511	5.774	273.446	33.803	161.43
191.333	146.202	-6.32	45.147	137.767	43.05	-15.752	95.286	31.381	268.312
191.467	146.183	-8.471	39.898	145.005	92.95	42.412	57.208	54.361	220.299
191.6	23.909	2.908	23.91	148.52	84.618	19.326	127.374	74.071	257.193
191.733	438.458	4.887	8.741	128.189	74.479	-63.539	156.776	8.584	226.992
191.867	146.162	-3.221	17.484	71.255	144.098	45.542	181.395	41.056	294.875
192	-3.982	138.262	-13.668	199.883	109.337	257.7	115.542	32.506	227.529
192.133	146.087	137.846	57.528	103.903	63.257	-47.591	131.696	25.393	302.332
192.267	291.827	-25.849	56.114	134.981	94.185	53.349	144.282	7.653	250.748
192.4	292.105	136.813	48.809	136.477	94.215	44.964	110.222	4.312	159.909
192.533	146.989	-18.573	17.896	128.178	92.341	-14.508	6.265	26.295	233.657
192.667	144.033	-9.174	27.526	149.4	133.609	17.337	140.303	34.812	295
192.8	146.015	137.322	97.858	87.71	80.454	11.235	160.116	36.365	230.682
192.933	292.208	-139.266	42.359	170.652	111.962	117.808	52.802	22.493	314.277
193.067	146.171	136.504	80.712	122.03	81.805	-2.263	89.606	7.729	121.468
193.2	146.142	3.291	-56.635	145.314	92.801	10.547	98.538	9.171	207.926
193.333	-6.695	139.553	164.621	170.405	130.997	4.072	127.731	22.992	185.822
193.467	146.753	-12.196	8.772	112.946	147.514	-14.253	155.174	-11.751	126.527
193.6	146.131	137.162	9.44	98.985	62.226	-3.023	161.924	25.387	371.004
193.733	-6.466	273.983	15.639	164.236	111.534	12.864	189.574	17.931	270.621
193.867	-3.618	0.399	34.933	176.281	70.74	7.557	65.007	13.025	220.101
194	-1.305	-5.443	78.632	117.963	116.587	-13.219	129.701	-9.552	237.689
194.133	-7.2	137.016	56.245	108.561	70.424	9.853	186.59	7.665	235.786
194.267	-3.773	28.626	37.894	191.543	80.726	-1.895	182.686	14.366	212.377
194.4	0.189	-137.645	31.378	76.583	78.574	10.906	176.456	15.597	257.889
194.533	0.003	139.219	66.839	43.904	89.548	-1.435	166.905	5.032	236.91
194.667	146.278	-139.158	62.586	152.659	73.609	-113.641	168.537	-1.713	187.121
194.8	0.702	140.31	32.096	119.575	23.325	-6.408	120.081	15.093	242.574
194.933	146.276	5.914	49.575	104.152	36.816	4.458	95.463	5.954	233.421
195.067	146.122	139.515	-27.925	175.169	48.135	2.637	59.523	-5.009	204.69
195.2	-2.628	7.435	-689.138	56.225	46.279	100.051	46.915	-2.688	195.531
195.333	-9.414	139.667	-473.246	106.993	36.077	-9.931	4.955	4.386	217.762
195.467	147.223	137.963	-261.819	51.693	26.771	16.455	15.695	2.075	130.178
195.6	-20.767	-137.989	-78.391	140.527	74.075	2.469	-2.354	7.4	248.237
195.733	-23.345	3.179	-13.722	57.214	28.115	-8.062	5.349	4.066	195.98
195.867	293.738	-137.319	-14.617	142.664	-66.52	-92.227	36.898	-4.021	182.863
196	-20	-8.136	-80.38	5.799	64.996	-12.951	54.617	1.491	213.747
196.133	147.119	273.483	107.034	246.328	47.076	-3.449	-166.422	-2.758	183.969
196.267	10.142	15.768	-121.404	149.149	129.191	-5.421	-170.512	2.542	172.318
196.4	436.622	411.336	95.547	112.702	61.523	13.631	-349.713	6.207	232.642
196.533	-6.011	-6.278	-80.799	89.881	85.266	27.942	-271.975	-6.118	166.73
196.667		2.017	4.6	133.191	40.985	5.919	-307.486	-5.803	229.013
196.8		228.478	109.35	104.705	89.096	104.485	-134.99	8.966	148.544
196.933		-134.33	-50.717	103.678	85.381	27.708	-11.666	-15.98	253.064
197.067		-5.476	25.154	127.407	54.643	12.949	32.273	-13.845	204.373
197.2		134.353	84.377	115.91	86.596	-95.353	36.079	5.123	274.901
197.333		-5.236	106.974	82.015	76.294	125.395	5.528	15.737	193.052
197.467		-269.322	30.257	110.76	51.692	-2.083	-18.298	-6.159	197.725
197.6		134.432	-17.714	19	40.68	-6.061	83.681	-31.016	189.352
197.733		25.848	116.499	70.348	59.748	0.652	56.296	5.46	271.091
197.867		-3.041	10.234	109.466	35.599	21.435	125.061	58.773	256.438
198		-268.921	30.912	42.878	46.6	22.581	122.549	4.917	146.197
198.133		-19.377	8.086	150.199	76.431	-8.992	96.165	54.437	190.725
198.267		-2.45	2.128	75.495	36.151	14.385	113.567	69.466	211.416
198.4		-134.385	-47.329	126.42	78.373	10.062	76.397	50.781	235.671
198.533		134.945	123.553	131.954	111.622	-89.667	56.109	6.511	221.78
198.667		-134.435	-15.928	104.005	70.091	2.7	47.314	-24.435	183.154
198.8		-134.487	42.262	101.252	62.14	19.104	46.199	33.98	97.582
198.933		134.316	47.736	112.804	82.036	42.678	43.245	11.467	247.363
199.067		134.364	33.986	74.403	45.995	-27.231	105.041	125.741	105.126
199.2		-134.353	43.996	104.426	65.996	126.482	116.439	85.28	152.477
199.333		1.625	-4.699	85.118	81.84	19.794	151.809	66.261	165.309
199.467		268.646	-8.976	98.616	79.451	-7.166	149.717	46.836	200.145
199.6		10.112	-3.34	92.669	98.47	-92.221	54.041	6.36	196.304
199.733		134.303	-10.863	43.266	87.764	-6.984	100.068	7.374	244.968
199.867		134.321	26.725	96.737	83.575	-20.905	118.012	15.972	250.2
200		134.565	134.937	58.58	86.77	7.154	174.339	-6.388	205.852
200.133		21.655	16.658	61.058	48.762	128.56	108.193	12.412	200.235
200.267		-5.218	-21.45	152.428	16.675	9.693	100.106	23.622	215.729
200.4		134.468	-4.883	-26.044	23.269	6.892	200.546	-22.474	256.653
200.533		3.338	-21.925	241.629	-6.485	-20.002	-18.012	-106.404	245.296
200.667		-134.676	-21.731	-16.753	70.903	3.796	22.471	-32.623	271.9
200.8		134.695	4.355	228.975	55.319	-116.648	18.756	-11.333	257.127
200.933		-4.531	6.071	124.233	62.168	8.931	35.797	-29.882	226.397
201.067		0.664	29.809	123.564	112.658	-12.436	48.283	10.654	169.492
201.2		-17.035	44.634	166.627	79.238	16.539	71.017	13.195	160.105
201.333		-0.971	37.971	178.812	85.803	-59.764	25.625	2.639	204.059
201.467		-2.148	-9.789	173.3	73.319	-69.494	37.262	-1.652	176.714
201.6		-3.234	29.72	183.429	81.174	-87.925	17.8	1.113	82.77
201.733		135.835	113.284	100.349	96.566	-79.742	36.377	3.458	170.736
201.867		3.844	144.093	179.599	45.081	-83.334	8.833	-3.068	109.544
202		15.076	17.906	167.632	106.515	-123.778	10.274	-1.549	131.023
202.133		268.535	-4.756	160.007	80.008	-109.251	159.717	-12.408	100.928
202.267		3.14	-7.25	117.569	39.091	-105.419	115.276	6.254	149.237
202.4		1.376	-12.031	144.725	103.708	-119.153	150.511	2.126	85.045
202.533		134.662	-21.857	46.052	24.426	-148.034	106.672	-4.644	135.453
202.667		-0.891	-7.206	115.44	109.559	-147.208	103.417	-3.777	129.349
202.8		-4.545	53.843	53.198	56.761	-57.112	74.236	-9.138	111.728
202.933		134.379	-35.479	180.259	42.51	-105.526	66.167	-11.74	164.049
203.067		5.09	102.914	115.813	115.021	-91.761	39.005	-9.424	165.635
203.2		-3.334	-40.316	149.753	76.738	-75.68	127.709	-1.01	178.753
203.333		134.392	-8.686	114.32	65.248	-72.984	112.036	-2.279	317.05
203.467		135.023	-98.279	109.508	79.288	-13.128	89.653	3.103	215.987
203.6		135.139	-4.456	125.564	94.284	4.875	189.029	-5.749	139.229
203.733		269.679	128.012	77.763	30.886	-2.551	41.964	24.543	148.488
203.867		12.38	74.374	118.852	63.275	44.855	132.32	14.69	135.15
204		2.531	-16.145	110.969	89.287	-3.909	-30.262	-15.324	157.367
204.133		-10.21	62.007	92.168	64.986	17.495	76.905	-21.099	173.098
204.267		269.243	105.676	152.718	116.939	-15.441	113.586	2.736	166.506
204.4		537.266	30.128	160.393	68.247	36.788	118.86	9.608	73.74
204.533	68.762	134.645	3.954	132.966	20.921	27.537	102.721	-5.839	73.633
204.667	145.311	134.502	-27.627	124.838	75.156	43.211	115.498	19.505	72.548
204.8	145.836	5.072	20.913	126.002	42.47	7.871	161.444	-4.227	221.741
204.933	145.593	-4.986	102.441	128.485	57.065	37.52	86.465	-25.906	-97.148
205.067	147.704	134.802	188.078	79.232	61.573	23.385	83.439	11.434	3.979
205.2	145.459	-134.484	57.121	95.811	70.649	36.012	149.867	3.708	31.007
205.333	294.899	26.317	20.454	87.815	96.217	7.333	194.673	55.578	54.195
205.467	8.128	134.729	8.665	62.879	103.085	32.372	102.887	64.967	105.294
205.6	145.879	134.118	-7.384	66.009	53.492	82.177	181.23	7.944	125.157
205.733	-2.04	-134.352	35.223	97.816	36.531	58.45	138.116	4.339	170.12
205.867	292.176	134.332	113.821	51.387	39.165	47.594	136.784	-9.674	194.748
206	-43.313	15.596	28.181	40.445	107.486	99.098	134.64	-78.181	135.687
206.133	204.25	143.732	11.518	70.396	63.282	52.271	134.964	-205.258	129.851
206.267	184.603	55.256	34.745	44.924	71.783	164.013	136.373	-170.208	146.263
206.4	165.491	62.557	41.273	9.488	70.969	67.674	29.187	-96.109	212.084
206.533	141.708	57.311	28.258	29.915	63.704	31.157	144.995	-31.654	139.529
206.667	148.31	58.774	29.478	40.884	41.843	-25.977	273.06	-32.33	201.649
206.8	146.891	31.643	12.292	14.435	82.598	83.896	30.576	-122.898	154.014
206.933	196.8	10.975	28.025	-3.83	66.566	163.525	137.611	-102.089	251.926
207.067	163.96	17.437	-9.873	-3.649	71.925	107.474	-177.568	-72.463	135.92
207.2	41.739	11.212	32.032	2.252	70.085	-27.176	277.082	-60.512	181.683
207.333	-394.502	5.327	-4.169	34.603	69.814	47.479	4.493	-71.365	148.42
207.467	-514.559	13.058	20.845	35.244	59.094	49.133	8.543	-9.126	171.175
207.6	-443.856	-5.388	11.699	4.772	47.117	121.511	-134.055	38.969	105.469
207.733	-314.039	-14.953	20.866	-2.769	107.454	-100.103	-221.631	59.488	69.577
207.867	-450.919	-1.722	33.164	14.374	53.732	90.915	-210.861	46.906	63.108
208	-275.516	-15.438	13.73	35.231	37.74	-60.611	-451.003	65.434	79.486
208.133	-215.84	3.639	66.644	-40.407	74.675	107.511	-185	38.774	90.017
208.267	24.91	13.154	17.112	66.146	74.284	-68.653	-106.347	45.267	26.191
208.4	-169.778	12.358	13.624	-48.104	90.03	106.012	-93.244	68.81	73.253
208.533	-65.474	22.406	6.463	53.693	49.142	-104.986	-16.218	53.96	109.168
208.667	-53.788	-19.474	31.958	-9.347	58.707	10.399	-7.267	38.847	115.037
208.8	-47.68	-43.939	-2.655	-19.133	53.915	21.355	-39.663	31.107	147.456
208.933	-6.722	-7.942	9.866	40.346	69.14	9.348	10.62	13.248	96.076
209.067	-1.798	13.91	-1.098	56.79	99.282	-19.824	47.904	42.909	104.839
209.2	6.068	178.705	-2.799	22.909	119.34	20.78	-228.436	38.218	69.875
209.333	72.496	121.22	3.854	24.687	101.613	-15.854	-164.148	25.532	-10.585
209.467	219.269	33.779	6.952	11.363	107.861	30.831	-146.904	4.445	81.963
209.6	268.386	10.767	-2.351	-177.393	81.255	40.114	-175.029	17.064	118.955
209.733	132.098	-22.646	-5.538	-324.855	80.024	32.41	-153.093	29.808	74.256
209.867	82.912	42.929	-14.148	-309.622	81.516	-4.931	-134.975	8.215	100.184
210	175.603	158.404	1.783	-295.355	61.558	32.807	-20.034	13.393	121.234
210.133	125.549	28.004	-4.673	-240.646	96.381	27.098	-108.695	1.788	78.434
210.267	359.744	222.134	88.506	-154.091	171.789	11.887	197.201	164.662	387.051
210.4	325.716	289.686	181.552	12.902	352.074	266.183	516.982	382.359	440.18
210.533	491.179	41.796	425.975	468.961	248.128	248.916	371.333	377.006	380.916
210.667	563.24	-182.582	359.783	528.713	-12.105	202.288	310.681	367.034	416.214
210.8	178.366	-143.188	300.775	544.551	363.26	248.205	470.822	351.85	331.661
210.933	325.389	240.306	442.321	601.387	240.493	248.337	647.096	373.233	352.72
211.067	368.179	345.961	282.783	570.77	212.918	198.07	189.34	266.044	465.966
211.2	362.708	257.167	221.89	523.434	356.029	167.958	518.64	206.959	551.198
211.333	376.968	230.528	161.385	443.067	257.343	156.607	244.204	242.018	284.527
211.467	383.946	202.29	113.233	430.415	298.965	119.663	308.405	169.54	368.234
211.6	312.998	211.135	104.988	334.527	84.052	60.729	294.01	105.389	321.022
211.733	379.421	163.291	77.032	255.253	295.79	11.088	241.758	131.379	386.663
211.867	386.191	155.997	108.783	337.806	74.625	13.645	227.336	76.788	369.532
212	343.388	206.663	79.903	311.726	144.609	2.606	362.131	69.326	425.335
212.133	354.61	144.689	112.775	384.193	163.099	16.558	339.834	-7.605	368.081
212.267	417.277	154.503	142.965	348.287	172.329	-16.955	337.506	-14.708	321
212.4	360.281	168.852	138.967	384.476	140.437	18.976	166.961	-23.088	341.569
212.533	349.26	196.271	121.425	407.123	145.256	-14.736	504.036	25.505	274.705
212.667	408.611	191.983	81.204	338.257	172.936	-25.639	302.669	18.52	427.255
212.8	344.031	138.674	115.38	385.34	125.001	36.201	187.767	-11.862	199.621
212.933	333.878	122.927	59.698	325.947	146.281	137.25	379.384	1.626	287.049
213.067	325.232	122.311	287.194	261.452	133.815	66.396	266.792	-17.578	318.887
213.2	314.222	112.961	145.414	342.513	100.978	77.235	335.779	12.889	324.529
213.333	246.286	122.274	185.035	324.876	139.732	65.833	348.873	-10.339	311.234
213.467	283.652	157.676	108.569	417.366	142.736	43.052	217.799	9.345	300.153
213.6	229.945	138.469	126.225	413.327	111.826	-9.029	254.45	9.459	312.793
213.733	311.131	74.268	153.754	367.963	119.174	-20.334	362.397	24.862	302.745
213.867	377.71	90.258	91.944	349.248	111.587	-24.904	276.022	6.479	354.876
214	290.513	92.75	92.113	346.406	136.06	-16.617	201.925	7.655	313.652
214.133	349.52	149.404	103.496	326.687	67.582	-3.738	271.601	-13.499	280.2
214.267	366.843	106.205	123.105	336.918	104.827	23.034	320.981	19.628	343.091
214.4	309.04	24.337	118.059	309.878	78.531	56.614	233.125	-13.81	289.478
214.533	313.303	37.65	106.638	409.244	104.731	100.563	188.194	-14.601	308.532
214.667	443.052	232.36	116.54	341.49	67.986	140.956	220.954	-6.281	277.795
214.8	279.129	133.591	84.944	384.064	79.798	228.857	375.599	10.57	328.521
214.933	297.279	162.485	94.321	342.254	90.507	60.41	263.412	-24.592	279.083
215.067	292.042	302.008	56.043	355.835	68.805	70.355	265.716	-8.19	259.892
215.2	296.912	124.247	41.145	311.991	166.729	64.177	267.785	-3.513	258.593
215.333	317.203	105.938	39.732	541.468	98.753	51.585	327.732	-14.988	214.932
215.467	209.753	159.484	-73.537	410.484	111.509	23.494	259.684	-15.554	280.694
215.6	438.106	88.964	118.758	366.536	112.301	22.356	107.695	-10.665	305.815
215.733	296.442	179.24	93.342	218.959	112.702	18.328	371.543	-7.531	302.321
215.867	175.434	95.472	27.618	304.799	142.502	8.633	239.279	-17.415	300.566
216	284.793	141.303	136.165	370.724	10.499	16.83	245.16	-2.888	300.247
216.133	235.54	83.56	227.409	309.281	259.643	-4.727	207.709	-3.492	309.999
216.267	246.11	103.399	82.924	326.952	91.331	-13.936	188.006	-4.975	417.018
216.4	286.987	167.211	-8.499	278.134	75.763	-22.111	238.756	-41.294	210.872
216.533	305.143	103.059	24.905	324.629	76.404	17.472	188.659	-36.601	297.552
216.667	293.569	127.459	146.868	310.003	80.399	4.141	198.591	-20.794	281.752
216.8	307.545	103.603	16.258	340.771	83.901	-15.598	142.554	5.512	293.97
216.933	381.923	75.371	76.832	329.495	63.802	21.21	261.492	-30.833	209.635
217.067	295.914	89.642	-33.03	322.226	34.534	31.75	212.387	16.299	327.106
217.2	287.734	167.301	155.495	283.605	47.737	31.2	337.554	23.531	176.192
217.333	251.873	192.892	57.304	274.524	119.127	-5.502	246.926	94.569	243.373
217.467	318.403	63.102	143.46	227.29	101.448	-29.046	193.375	43.369	191.232
217.6	192.566	91.206	105.588	206.174	89.832	-35.103	262.501	1.889	226.429
217.733	95.827	56.426	60.458	217.35	112.913	-26.556	245.604	23.244	140.915
217.867	291.43	108.912	150.956	301.175	99.494	-139.138	239.592	4.326	245.634
218	216.277	60.622	77.807	351.735	84.973	-213.2	137.373	29.68	307.479
218.133	187.354	40.732	29.694	336.81	117.134	-158.541	239.757	55.575	200.942
218.267	189.6	51	144.328	231.773	119.31	-188.595	286.31	47.648	218.531
218.4	284.924	49.605	30.832	338.548	122.249	-134.622	255.952	-1.728	227.949
218.533	198.883	93.744	63.247	250.224	145.432	-64.321	192.81	-10.794	50.671
218.667	212.579	85.752	136.231	281.031	-13.958	-61.389	189.434	91.894	-503.475
218.8	167.297	157.262	-69.219	253.621	251.327	-20.396	154.417	12.513	-147.443
218.933	215.392	151.615	56.784	235.552	9.863	-17.083	191.907	28.836	-10.078
219.067	293.565	101.329	69.372	244.877	257.898	14.593	204.702	67.279	48.162
219.2	263.001	95.127	53.936	232.869	-12.812	17.001	164.623	26.254	-40.999
219.333	235.887	72.238	74.963	213.301	93.839	1.341	270.797	10.463	-285.351
219.467	159.715	45.626	62.46	215.375	143.039	-12.139	169.151	18.095	-66.936
219.6	247.417	25.325	56.444	214.086	96.951	-9.425	338.507	10.94	38.22
219.733	246.868	40.237	76.422	214.43	116.411	22.659	197.218	18.734	12.214
219.867	246.614	44.854	79.898	239.206	149.723	7.654	186.413	66.67	45.718
220	329.745	40.426	175.287	184.96	138.479	53.964	240.758	65.745	136.835
220.133	188.645	30.297	47.374	225.717	137.265	15.816	220.442	43.45	58.62
220.267	184.471	75.512	-89.074	168.546	115.343	-2.808	202.731	32.661	-232.771
220.4	211.841	175.912	130.259	207.956	129.091	21.03	223.306	-14.564	-188.977
220.533	241.366	56.215	71.284	170.247	194.13	142.617	219.518	52.05	-30.97
220.667	230.37	9.363	125.52	141.665	110.602	60.655	221.415	36.759	-8.475
220.8	212.163	37.659	94.013	171.576	98.319	12.932	212.975	99.215	8.969
220.933	176.334	32.783	210.396	136.658	109.117	-21.289	177.847	73.004	-1.713
221.067	187.246	49.32	99.801	124.544	92.527	154.888	195.349	60.077	58.98
221.2	196.088	79.736	126.221	102.253	103.267	-17.806	196.742	62.301	8.066
221.333	119.867	147.108	94.644	265.974	76.69	69.082	224.036	87.886	121.575
221.467	124.143	101.914	62.758	194.129	79.924	8.476	140.969	5.319	164.461
221.6	118.379	117.171	109.869	177.358	40.388	40.924	-109.429	108.378	120.473
221.733	86.998	111.367	-48.944	208.511	102.452	-11.065	-146.781	32.825	95.051
221.867	128.376	86.804	179.435	193.007	102.387	62.75	84.805	31.881	129.601
222	119.322	27.067	69.327	226.936	82.302	111.431	150.313	18.26	142.763
222.133	152.597	77.06	103.693	227.892	115.902	44.183	139.754	43.1	101.515
222.267	187.699	108.708	48.38	204.836	89.052	47.372	116.88	10.206	122.222
222.4	182.308	90.711	146.854	115.877	65.616	-93.926	159.625	-4.656	133.299
222.533	107.649	159.115	98.836	130.503	75.421	23.018	167.913	7.356	126.753
222.667	217.605	120.356	86.316	129.957	64.917	16.052	137.034	25.049	150.423
222.8	233.359	133.227	120.317	187.463	41.141	23.522	128.471	-18.017	96.343
222.933	195.102	116.124	76.675	107.908	99.957	-12.597	147.954	32.453	131.328
223.067	214.81	43.106	76.847	99.228	104.497	-26.988	232.291	31.426	234.238
223.2	175.447	40.448	11.723	-17.708	60.237	13.295	144.588	75.648	92.402
223.333	199.104	29.844	89.105	-320.028	20.291	-15.788	206.158	63.776	161.211
223.467	197.85	124.36	3.837	-141.66	42.857	-11.64	124.667	43.366	136.299
223.6	210.392	161.914	-8.189	40.306	43.678	-9.095	121.089	45.179	131.959
223.733	265.634	83.651	99.98	44.42	68.411	34.021	197.476	-2.902	95.665
223.867	219.996	181.986	65.544	2.163	206.955	23.89	169.096	17.363	106.1
224	332.695	82.624	40.853	55.773	100.479	30.95	173.865	-1.399	33.272
224.133	175.155	116.449	60.96	147.215	105.656	56.8	111.143	15.883	74.889
224.267	166.411	138.439	85.867	275.839	52.477	37.987	129.637	18.012	125.785
224.4	216.209	177.46	78.33	110.301	109.169	123.639	138.712	-12.738	140.111
224.533	242.329	166.295	55.254	223.144	112.711	38.327	143.222	15.581	166.099
224.667	208.022	169.587	75.44	118.758	101.477	-64.849	175.152	28.664	140.553
224.8	179.301	142.912	54.043	160.444	75.232	50.669	160.426	20.336	98.981
224.933	175.391	76.502	80.65	136.512	81	20.525	152.697	-2.531	161.757
225.067	169.165	-139.384	79.919	140.098	101.713	37.426	195.709	14.488	100.451
225.2	165.8	-101.868	66.804	108.207	59.97	-8.74	87.296	4.082	116.318
225.333	45.339	24.869	58.086	29.899	88.642	-8.899	169.359	42.359	115.97
225.467	191.803	103.94	19.96	40.617	-40.149	19.547	167.499	42.996	123.169
225.6	108.331	66.838	-1.216	87.619	105.282	14.074	171.101	15.007	115.21
225.733	137.223	116.877	26.344	155.759	34.879	24.663	180.371	54.132	196.249
225.867	117.684	41.551	16.531	113.058	55.933	-10.162	171.563	33.635	103.736
226	143.415	85.94	24.925	112.99	85.911	20.915	145.991	3.074	161.342
226.133	176.987	95.531	23.406	140.373	20.891	-6.409	224.122	17.499	119.17
226.267	144.143	148.014	-16.317	87.605	72.784	32.398	91.092	4.707	6.578
226.4	214.937	103.696	-10.602	59.07	84.059	145.398	172.121	4.843	159.68
226.533	231.157	191.963	17.107	89.274	71.076	-33.05	205.264	-4.108	95.109
226.667	210.79	198.767	-45.698	144.742	282.478	48.163	-43.646	13.631	93.946
226.8	218.698	48.003	56.671	133.637	-69.392	34.967	-327.039	-5.834	140.665
226.933	188.672	137.715	27.631	114.766	92.731	44.645	-134.876	2.261	98.874
227.067	252.24	51.581	36.765	33.965	46.991	21.791	-26.673	-0.97	249.776
227.2	220.641	96.122	-50.173	80.463	56.341	-4.101	46.638	-6.54	182.803
227.333	114.703	93.72	143.311	36.705	102.882	7.791	88.451	-2.236	147.22
227.467	219.132	35.62	31.281	56.591	104.369	68.014	118.41	-2.458	114.628
227.6	218.212	55.959	59.893	31.62	85.408	-4.031	228.16	-4.13	119.615
227.733	241.032	51.898	33.157	59.927	220.304	20.948	166.175	-2.614	117.873
227.867	212.507	-5.644	45.209	102.299	69.223	14.29	123.989	-9.43	144.776
228	312.325	-11.792	72.69	125.793	99.77	-16.025	206.129	6.633	200.117
228.133	195.98	-13.631	41.633	160.413	-37.735	3.11	121.423	8.915	182.654
228.267	221.999	9.241	28.549	131.762	93.256	4.842	86.52	5.855	162.012
228.4	205.362	-19.447	45.597	91.798	77.421	-5.898	117.704	-10.016	163.248
228.533	224.31	-8.708	33.569	110.274	104.622	7.683	111.218	-6.14	170.519
228.667	235.614	29.375	-2.718	156.194	93.373	12.444	94.851	8.207	143.372
228.8	189.595	46.631	69.037	141.123	98.555	-12.254	144.798	-5.172	195.595
228.933	218.612	134.728	17.009	182.293	78.584	41.843	36.977	2.452	162.439
229.067	251.022	299.299	22.97	212.888	78.968	23.087	131.875	29.162	137.246
229.2	195.926	93.846	49.954	213.237	86.135	15.887	122.434	-25.656	224.935
229.333	216.071	71.01	140.406	216.952	19.083	-6.843	129.607	-2.142	166.799
229.467	241.174	73.104	93.033	146.13	183.099	27.097	135.961	25.217	135.063
229.6	208.953	51.254	88.481	261.715	111.68	-32.18	179.907	5.632	96.91
229.733	193.749	35.754	6.241	200.054	82.145	41.956	98.622	0.309	109.603
229.867	230.983	17.649	34.66	147.926	83.072	21.945	-8.651	-9.339	86.213
230	206.122	66.191	137.279	168.564	85.279	5.858	28.26	2.008	90.821
230.133	213.046	105.766	25.915	147.608	30.166	3.641	80.946	-3.03	110.583
230.267	178.078	118.992	14.134	206.994	92.555	38.453	97.163	14.18	110.35
230.4	212.565	194.696	120.735	200.276	105.786	24.097	219.386	5.3	112.276
230.533	239.735	207.085	50.75	240.932	102.536	97.566	152.215	3.344	105.729
230.667	253.37	124.894	97.895	173.281	79.216	46.12	187.925	-7.726	189.032
230.8	193.715	140.605	75.628	189.515	73.561	21.432	163.046	-8.083	91.776
230.933	78.198	203.967	41.91	227.505	103.23	76.486	282.405	-10.826	87.32
231.067	245.061	294.686	36.538	138.011	89.554	23.342	123.451	25.896	114.248
231.2	237.402	119.904	71.243	199.508	60.188	24.853	176.887	-16.919	86.792
231.333	274.457	64.933	64.661	128.739	44.027	8.083	151.076	6.597	-23.187
231.467	207.765	22.644	31.432	246.608	96.544	22.893	182.185	-5.6	216.153
231.6	177.458	130.236	-54.916	156.951	143.365	15.43	142.05	17.864	51.138
231.733	177.977	92.652	137.2	224.473	83.833	-26.529	209.909	5.05	97.199
231.867	157.605	86.153	-102.763	137.075	108.297	7.52	144.705	-12.023	44.318
232	131.271	84.668	-13.734	162.919	69.838	-8.577	221.095	12.28	89.478
232.133	297.326	112.415	92.78	209.122	54.051	10.703	245.599	-27.49	88.349
232.267	279.448	90.998	-42.82	210.568	105.87	-20.127	210.592	-9.389	69.327
232.4	310.437	97.246	58.584	194.522	89.288	-11.834	175.447	7.797	-65.464
232.533	70.717	112.297	-74.476	257.013	66.543	-1.844	113.355	4.599	94.749
232.667	244.069	213.808	71.454	243.027	58.635	19.1	179.365	-10.033	-7.09
232.8	148.105	201.359	-7.194	244.591	109.322	-24.1	155.943	-31.016	-108.4
232.933	107.449	63.57	86.201	213.765	99.931	4.052	144.537	-10.747	-38.659
233.067	79.736	150.741	59.97	159.13	85.981	23.361	247.137	15.858	-13.049
233.2	98.25	135.916	67.022	170.523	61.52	4.099	231.301	19.307	21.724
233.333	148.207	196.175	64.078	145.15	54.62	-7.245	152.551	22.375	39.669
233.467	113.008	99.021	20.43	244.352	62.761	12.046	162.888	5.822	125.011
233.6	182.979	76.456	8.314	141.593	97.117	-5.959	143.197	10.582	40.256
233.733	153.455	79.214	106.631	202.502	76.018	-5.588	237.261	25.984	3.396
233.867	180.246	49.927	-114.518	194.394	96.463	3.803	202.072	-5.576	10.639
234	176.502	11.902	118.695	220.475	92.206	-8.073	230.272	16.73	4.122
234.133	141.703	-9.294	-86.071	52.172	102.089	7.316	282.161	-6.947	10.368
234.267	151.681	43.469	3.699	108.79	85.034	18.412	251.269	2.014	-10.623
234.4	172.408	127.23	-6.441	147.041	94.649	4.373	335.258	-1.462	2.422
234.533	171.072	99.804	4.01	152.805	101.299	-14.389	225.404	-2.942	7.762
234.667	191.459	14.367	144.954	106.554	146.903	22.507	223.791	17.387	-10.929
234.8	195.589	-3.367	-171.106	136.04	74.596	-1.738	223.197	-22.509	3.538
234.933	186.783	-25.949	17.254	129.93	107.268	-10.778	203.054	-4.291	11.065
235.067	151.579	56.195	8.428	187.917	101.272	-21.22	193.845	17.943	-20.507
235.2	133.873	180.907	60.781	152.644	104.278	9.874	205.577	-3.958	8.192
235.333	129.24	19.81	-24.619	88.124	83.047	-5.627	181.425	13.539	-24.881
235.467	5.589	160.11	18.396	72.72	106.053	-9.194	168.695	-0.624	11.738
235.6	128.205	271.068	-38.317	142.856	103.623	-23.386	154.805	-6.371	-8.762
235.733	240.447	93.423	-35.561	136.781	125.856	5.386	152.944	-4.757	-32.907
235.867	36.61	77.148	-53.274	150.414	71.462	27.209	132.077	17.557	24.223
236	179.454	17.518	19.156	140.702	100.65	25.603	114.536	-3.237	49.756
236.133	207.202	28.204	97.615	153.632	44.035	20.312	90.689	6.186	34.23
236.267	191.897	11.059	112.617	200.178	98.993	33.238	20.733	-14.161	101.975
236.4	249.092	74.81	-27.656	176.886	109.673	27.753	60.491	-2.926	47.901
236.533	154.103	32.708	114.133	187.026	108.278	60.927	-35.645	-5.94	94.56
236.667	200.322	129.516	50.442	244.707	79.07	44.628	29.698	5.425	61.415
236.8	239.979	83.52	-20.937	245.227	93.883	87.833	34.211	1.283	-54.283
236.933	145.713	111.808	127.001	173.658	118.138	100.349	20.437	-6.657	136.082
237.067	135.032	93.662	21.315	152.892	84.484	105.085	-11.177	-8.598	50.281
237.2	266.605	22.465	48.575	154.105	83.229	66.907	20.077	-12.223	68.345
237.333	158.929	31.197	58.65	208.249	103.225	92.018	19.297	2.399	62.626
237.467	154.654	51.293	81.521	152.99	97.06	66.506	13.227	12.072	70.619
237.6	177.224	114.523	-45.835	130.601	109.243	59.166	-2.924	2.293	92.873
237.733	176.474	64.58	162.661	132.224	102.02	44.408	-58.816	13.873	42.436
237.867	162.299	54.953	-69.119	244.034	113.75	20.709	-148.251	13.621	70.89
238	124.979	92.588	61.49	220.973	112.353	17.938	-168.411	18.121	132.228
238.133	93.962	95.593	168.8	206.849	105.587	33.932	-128.463	-2.84	96.873
238.267	89.298	60.635	-80.258	165.409	107.943	24.363	-121.563	13.617	77.278
238.4	59.977	53.138	56.044	171.794	107.971	42.124	-147.52	2.03	56.92
238.533	38.424	50.714	158.379	128.059	67.61	13.181	-83.944	-5.781	25.081
238.667	48.892	52.748	45.929	6.233	103.935	50.791	-190.32	-14.339	50.79
238.8	21.827	57.404	44.797	96.275	104.566	28.926	-86.451	-6.285	100.79
238.933	47.346	108.335	-38.181	12.894	97.001	22.935	-19.17	16.748	32.799
239.067	37.065	58.458	65.749	-53.998	67.302	10.359	144.967	11.902	55.005
239.2	70.586	75.497	149.858	13.698	106.75	66.951	247.497	-12.74	107.116
239.333	116.882	84.484	53.321	33.204	73.235	67.663	199.567	5.536	42.166
239.467	131.622	74.93	77.137	1.318	104.444	66.77	158.906	-12.362	75.121
239.6	102.888	60.275	60.734	180.812	76.231	11.491	230.811	1.658	38.424
239.733	137.152	69.975	78.62	-132.82	96.65	53.236	134.697	-11.972	16.839
239.867	110.026	38.033	103.869	73.522	90.992	42.804	167.945	8.034	13.963
240	92.586	47.399	129.372	176.456	123.016	55.717	158.411	20.028	34.35
240.133	115.952	94.15	92.383	59.116	90.557	29.966	120.913	-13.027	-28.8
240.267	115.769	213.358	164.919	302.99	242.365	62.584	377.701	161.005	358.616
240.4	192.266	409.954	297.019	421.38	288.023	74.838	272.896	265.343	436.187
240.533	377.838	350.231	275.071	501.099	279.462	132.524	286.067	211.826	286.675
240.667	348.676	372.971	297.494	417.237	272.973	101.761	344.079	355.334	411.262
240.8	322.839	324.182	184.451	375.872	243.492	105.151	401.18	297.43	398.486
240.933	125.109	384.65	174.719	478.005	201.83	95.687	428.855	183.256	434.8
241.067	300.415	345.93	157.49	387.145	103.033	101.659	362.229	397.53	477.508
241.2	288.43	355.667	191.621	398.367	140.555	89.069	388.703	409.462	413.477
241.333	299.99	385.804	161.745	380.256	84.869	74.359	323.669	427.404	382.659
241.467	343.36	331.335	149.567	282.99	105.554	27.719	297.144	461.057	330.093
241.6	302.638	226.305	139.458	161.819	80.269	42.531	239.98	257.131	380.017
241.733	281.218	135.814	101.429	321.934	67.565	20.399	210.963	177.839	351.65
241.867	268.731	222.902	113.303	275.939	66.034	1.358	223.641	129.069	251.349
242	250.841	169.522	165.03	233.027	87.617	35.257	248.162	103.752	252.043
242.133	285.82	230.949	133.739	358.858	48.726	22.102	258.765	132.709	402.598
242.267	171.544	184.119	117.092	240.335	82.351	-22.543	315.141	140.246	179.306
242.4	92.898	158.318	108.929	244.411	55.632	17.012	338.773	160.299	399.053
242.533	21.855	222.663	118.129	394.828	38.274	9.638	267.923	156.716	402.016
242.667	11.281	213.698	134.247	310.238	73.308	8.394	298.776	105.691	315.5
242.8	25.823	217.088	116.954	296.447	72.963	3.204	221.645	161.012	397.163
242.933	13.574	193.405	77.414	337.923	47.824	-18.398	280.027	197.593	266.197
243.067	-1.419	179.022	105.81	303.628	49.385	-85.701	225.222	182.529	287.377
243.2	9.235	103.345	111.175	304.99	47.648	-132.517	260.312	136.429	309.232
243.333	17.434	66.792	64.779	296.047	41.186	-133.565	364.809	84.875	265.384
243.467	2.663	27.537	78.527	263.746	31.906	-156.39	329.772	50.764	279.111
243.6	7.296	13.331	53.209	258.465	60.474	-201.388	276.342	31.123	251.733
243.733	7.507	-48.569	86.222	295.378	9.061	-173.455	307.395	-4.367	297.803
243.867	3.661	184.002	35.951	281.874	44.31	-209.206	261.163	1.75	351.938
244	6.264	99.934	37.705	320.971	86.843	-189.055	263.626	7.957	296.256
244.133	-16.414	122.465	170.324	249.402	45.377	-132.42	230.538	11.781	292.619
244.267	18.32	53.389	70.115	223.643	48.35	-105.152	256.293	4.956	329.621
244.4	45.498	62.609	94.818	250.963	61.268	-150.348	234.705	15.304	304.073
244.533	22.895	60.078	120.289	240.273	40.389	-124.425	263.11	-4.293	223.283
244.667	16.133	29.658	28.355	296.232	39.033	-35.416	310.321	6.698	377.521
244.8	-42.689	124.348	17.586	300.342	77.008	-15.438	227.001	30.722	431.552
244.933	-102.719	139.801	-12.744	268.994	51.743	10.476	295.315	18.647	294.478
245.067	-149.851	82.967	9.772	237.349	75.463	40.873	227.1	22.365	298.444
245.2	-211.558	38.178	-9.945	217.025	74.312	41.291	283.12	-3.155	256.057
245.333	-255.352	72.831	19.481	274.092	55.705	27.666	238.022	16.328	209.747
245.467	-291.903	94.688	-5.589	239.979	60.139	11.885	314.539	-14	357.794
245.6	-147.766	109.219	9.002	245.324	59.733	15.506	240.28	6.309	366.606
245.733	-154.869	101.461	-5.725	244.327	38.603	-19.911	243.207	-27.173	217.854
245.867	-204.01	126.373	-4.101	258.738	75.005	62.286	220.138	-19.387	279.959
246	-178.383	145.457	11.808	269.646	68.511	20.627	198.093	97.92	326.415
246.133	-226.939	111.743	-10.665	245.74	47.147	22.995	222.342	93.444	377.832
246.267	-217.374	126.77	3.749	179.116	79.442	-12.819	194.297	152.307	173.797
246.4	-272.248	85.728	-8.111	159.561	40.759	43.725	194.343	-13.169	117.68
246.533	-233.691	107.504	6.762	230.182	36.009	-11.955	168.554	32.898	238.29
246.667	-284.143	194.955	-25.359	214.602	127.275	53.505	188.671	7.084	319.387
246.8	-298.579	142.552	-3.125	210.172	62.233	1.731	239.731	23.431	245.325
246.933	-107.38	136.191	15.881	157.365	75.147	21.267	215.729	-322.165	258.985
247.067	-279.975	98.317	-10.697	152.828	59.717	-30.259	252.016	-384.267	281.814
247.2	-56.37	118.545	1.735	189.407	120.143	129.891	237.197	-256.591	300.109
247.333	-128.607	100.048	-17.492	155.719	95.811	-90.452	225.096	-206.145	264.155
247.467	-135.045	136.974	9.686	204.961	84.573	9.44	256.236	-230.136	250.22
247.6	-56.341	88.706	-14.476	159.748	96.142	-31.735	179.175	-130.663	248.341
247.733	-72.414	94.945	-91.364	210.857	87.489	46.888	287.767	-78.412	194.598
247.867	-54.101	140.729	-186.208	177.627	90.891	-29.754	216.42	-39.915	239.607
248	-116.735	61.276	-173.421	162.191	64.816	1.453	216.35	-11.548	159.685
248.133	-163.6	86.659	-163.816	159.399	68.17	2.747	220.477	8.963	207.154
248.267	-193.275	109.602	-201.355	203.696	99.257	-11.499	234.289	-2.076	192.98
248.4	-208.666	86.935	-175.881	150.328	67.745	-10.834	263.623	6.155	210.721
248.533	-211.553	108.641	-237.427	105.883	53.625	-10.656	244.801	-64.915	238.811
248.667	-200.906	128.157	-118.027	114.068	83.41	-12.296	254.899	-60.974	198.856
248.8	-188.641	113.218	-168.043	82.824	75.652	-8.497	251.745	-17.019	172.294
248.933	-269.703	67.198	-155.866	77.554	58.04	45.787	-43.393	-10.003	136.178
249.067	-209.223	99.731	-153.511	134.336	58.4	-26.909	-156.442	-145.687	169.746
249.2	-214.87	113.764	-86.272	217.758	49.825	24.936	66.908	-193.531	260.34
249.333	-132.483	100.032	-107.287	170.908	56.054	12.071	90.87	-171.368	216.687
249.467	29.888	81.148	-19.222	115.713	56.907	92.798	-144.988	-146.287	198.77
249.6	101.537	95.315	102.206	171.522	76.037	37.858	-149.208	-115.182	211.843
249.733	88.961	77.643	-52.097	169.27	83.911	3.856	-40.048	-110.453	172.759
249.867	138.978	107.221	-20.198	162.306	89.426	22.739	-15.967	-67.046	222.177
250	150.478	46.37	117.427	136.035	92.294	-7.684	58.552	-69.17	225.794
250.133	85.347	80.277	23.957	148.728	123.976	17.172	33.408	-27.209	221.06
250.267	138.584	114.479	35.199	124.363	113.844	0.656	147.776	-4.312	196.922
250.4	177.582	150.648	67.263	-12.582	63.525	-6.74	185.196	22.93	200.104
250.533	142.363	237.722	38.088	183.06	92.973	-109.305	200.266	40.66	203.116
250.667	116.609	46.749	24.817	174.062	19.984	-9.444	189.735	87.123	113.324
250.8	200.691	251.765	7.26	162.636	106.401	19.364	179.258	36.887	258.711
250.933	-20.158	149.328	14.211	145.21	49.452	-15.023	188.617	97.116	215.818
251.067	107.7	137.665	44.977	97.376	69.884	-50.186	132.319	69.139	196.56
251.2	64.068	100.813	34.673	302.283	39.701	-187.019	187.095	24.135	179.468
251.333	23.775	115.758	20.348	80.593	90.455	-120.889	197.263	57.786	207.026
251.467	22.199	104.074	5.574	137.429	53.204	-103.424	142.982	66.219	228.384
251.6	40.964	129.631	17.636	149.46	67.949	-143.131	166.953	20.166	241.249
251.733	162.61	91.227	1.65	100.269	53.63	-145.428	175.699	71.567	172.94
251.867	144.938	66.256	-8.201	140.752	64.998	-141.795	231.753	51.399	217.135
252	126.268	65.956	54.241	159.725	96.654	-89.762	176.802	26.248	226.682
252.133	82.171	96.021	-22.372	114.167	58.591	-95.492	200.502	28.011	224.743
252.267	16.637	30.296	-134.953	140.674	53.573	-17.738	238.902	-12.891	223.111
252.4	53.614	112.196	200.803	164.073	71.5	-55.048	169.728	15.329	234.731
252.533	30.081	81.473	-10.733	133.234	43.104	-70.468	222.659	72.621	263.502
252.667	113.645	53.702	-75.244	160.312	36.412	-42.079	204.326	14.824	196.08
252.8	100.416	67.576	-31.166	150.296	76.661	-49.523	35.14	3.323	207.858
252.933	-10.526	92.733	45.061	134.452	105.205	-123.229	322.437	39.099	205.433
253.067	6.127	89.338	26.629	171.77	64.24	-2.774	178.753	15.706	201.792
253.2	61.855	110.889	123.825	151.886	68.698	1.427	168.742	73.127	199.873
253.333	190.842	94.236	-40.769	119.806	60.045	69.386	172.17	83.414	206.16
253.467	155.775	95.681	9.85	102.503	104.852	-93.163	175.791	67.999	161.849
253.6	220.875	80.499	45.857	89.579	62.385	26.771	154.793	71.508	161.993
253.733	194.268	82.493	155.476	121.779	105.397	64.515	169.454	32.288	195.027
253.867	194.28	79.994	19.01	73.114	70.323	20.761	135.349	11.404	232.464
254	80.421	94.744	43.997	139.186	39.147	12.978	132.802	11.764	193.901
254.133	34.296	93.979	168.399	156.358	60.645	-46.895	63.106	46.001	186.342
254.267	40.691	160.841	50.348	124.718	65.421	69.086	241.948	-5.012	175.514
254.4	6.228	74.304	75.431	119.92	102.574	11.238	300.406	-22.458	199.831
254.533	-13.258	165.061	49.365	91.915	85.594	32.029	227.563	26.646	172.087
254.667	21.328	101.318	61.336	128.151	109.666	51.172	218.286	17.165	167.399
254.8	2.218	131.146	29.365	123.93	26.435	44.399	212.392	83.729	241.776
254.933	-0.634	147.448	57.509	166.228	77.86	-84.959	197.418	65.04	214.951
255.067	-4.476	122.327	12.948	152.881	68.478	45.504	189.901	35.102	219.994
255.2	-2.732	76.957	6.721	212.842	27.517	110.814	213.605	61.104	233.666
255.333	1.09	99.898	-42.32	164.523	71.102	14.29	227.086	21.439	216.26
255.467	-1.285	144.741	3.665	201.274	20.525	16.282	197.666	37.037	189.448
255.6	-5.7	112.53	2.029	157.394	71.438	54.649	251.503	10.578	195.615
255.733	2.991	94.142	95.75	206.239	53.681	71.2	137.617	29.067	221.215
255.867	-8.046	130.404	243.803	147.693	65.369	62.254	170.435	10.39	203.438
256	-27.392	241.896	58.613	187.035	97.766	62.911	260.403	4.507	227.984
256.133	3.946	123.992	93.059	150.608	87.897	24.549	226.036	16.812	214.806
256.267	-21.505	110.876	87.733	-31.12	80.269	67.279	177.226	38.118	164.128
256.4	-33.006	103.085	48.282	190.042	74.079	62.85	166.103	73.497	177.903
256.533	-101.341	92.519	40.725	301.492	75.937	-15.034	184.333	16.124	209.66
256.667	-170.562	111.359	13.694	161.685	53.017	114.398	206.649	21.399	154.121
256.8	-258.963	67.819	-7.11	130.57	52.433	78.815	162.218	21.944	219.939
256.933	-261.826	98.866	-19.266	158.689	49.196	49.56	151.808	-20.157	204.249
257.067	-209.072	176.146	40.144	165.309	97.921	76.506	107.328	14.569	181.773
257.2	-136.495	-7.171	-79.079	198.373	58.482	39.399	52.602	87.32	122.394
257.333	-213.95	121.32	-16.177	141.91	66.201	76.982	157.698	232.261	186.428
257.467	-208.269	155.799	25.762	147.525	66.029	41.583	326.189	86.853	166.72
257.6	-194.387	109.601	50.13	185.522	70.596	15.613	180.998	36.752	253.575
257.733	-229.501	96.326	149.553	175.836	79.781	20.942	168.795	36.269	223.38
257.867	-204.497	207.434	180.182	202.856	74.868	24.115	140.178	21.436	269.359
258	-120.691	20.28	28.057	196.012	41.238	24.72	150.8	37.777	247.585
258.133	-302.736	203.647	56.896	210.465	54.328	98.695	150.484	62.931	261.484
258.267	-239.093	-86.663	29.715	240.307	29.574	20.127	77.412	68.221	203.032
258.4	-155.005	134.774	23.101	196.39	67.027	-18.462	49.837	50.447	182.212
258.533	-205.78	-72.107	178.861	179.85	11.443	43.364	-70.53	19.187	203.81
258.667	-174.14	109.082	59.453	247.52	70.645	66.179	37.858	3.037	171.714
258.8	-206.42	230.881	-56.95	180.859	38.017	163.595	142.586	29.65	164.549
258.933	-123.152	-35.372	164.704	147.176	38.639	-69.421	19.365	39.606	174.963
259.067	-121.005	70.245	100.106	165.964	74.909	119.842	36.332	32.312	194.266
259.2	-226.755	132.833	16.187	231.097	78.951	-9.56	-73.138	40.764	171.88
259.333	-206.111	230.039	-9.864	128.547	41.935	15.679	107.395	2.01	167.219
259.467	-110.68	43.835	22.685	163.199	72.968	21.756	-97.228	29.125	158.732
259.6	-196.78	176.764	16.679	176.706	49.139	-78.219	-59.377	20.633	94.429
259.733	-264.514	82.831	-25.13	232.461	79.52	26.671	-62.09	-15.451	158.252
259.867	-423.738	120.156	6.712	173.303	116.853	14.649	-261.971	15.194	106.063
260	-147.247	215.6	-1.65	150.7	94.96	-26.226	-18.541	19.363	167.671
260.133	-80.839	68.901	-4.466	246.317	47.201	-9.703	-189.364	60.953	127.621
260.267	-8.971	69.734	-6.442	179.628	68.334	11.949	-294.412	114.328	120.399
260.4	36.804	130.58	-18.87	140.453	109.166	-38.177	-176.66	39.332	162.781
260.533	29.89	70.462	-16.142	175.636	56.257	-29.12	-201.543	45.512	167.646
260.667	62.71	105.758	-44.705	195.831	15.685	-178.415	-187.376	27.994	176.31
260.8	76.201	172.882	-164.142	181.807	97.091	-194.583	-240.13	27.313	193.441
260.933	76.618	48.455	19.497	185.893	79.314	-141.694	-157.781	13.212	242.584
261.067	66.713	81.849	-116.603	203.776	59.516	-132.107	-184.791	1.171	271.927
261.2	52.27	76.805	-149.375	175.734	42.731	-139.125	-56.745	6.625	192.477
261.333	57.017	103.631	-153.68	197.252	38.628	-150.359	-35.536	34.099	218.632
261.467	132.029	113.214	-137.683	167.516	43.205	-189.737	15.835	18.035	179.232
261.6	64.223	95.511	-49.802	258.902	63.213	-267.378	-18.241	36.027	229.555
261.733	79.568	97.175	-98.015	208.041	19.346	-118.75	39.523	21.744	192.153
261.867	118.975	133.339	-66.961	184.877	46.288	-85.065	-11.844	45.385	221.954
262	131.937	114.45	-65.217	167.609	23.394	-102.158	-2	13.621	212.279
262.133	85.246	115.33	-35.514	187.02	83.141	-83.795	25.366	-12.076	216.989
262.267	177.379	93.79	38.512	191.183	77.558	-26.964	10.868	3.34	224.448
262.4	161.29	105.598	-46.791	204.27	51.32	-108.968	-6.039	24.656	141.471
262.533	219.009	-6.79	-32.986	198.345	67.923	-105.522	11.299	7.098	201.33
262.667	248.653	266.541	-40.696	213.791	57.435	-39.629	29.31	-5.422	94.859
262.8	93.389	102.049	95.973	233.386	82.058	-123.092	-5.284	48.918	161.145
262.933	-49.666	114.113	-14.49	156.324	81.825	92.877	26.094	15.103	79.838
263.067	-56.248	-18.772	-43.076	233.691	81.431	-24.051	-9.156	-6.295	102.786
263.2	76.628	212.696	-49.581	153.371	38.157	-7.655	-2.183	-5.631	146.659
263.333	50.12	87.886	46.425	193.83	89.83	-121.947	-7.286	-13.622	107.001
263.467	-14.842	-43.186	147.424	192.397	33.4	13.007	28.125	34.093	153.652
263.6	-87.688	79.11	209.59	207.936	54.416	-1.359	-3.768	-36.408	179.125
263.733	56.822	220.902	141.783	206.064	30.422	59.526	-26.168	9.998	150.894
263.867	115.617	-20.621	106.101	226.88	27.649	8.664	27.21	-10.192	187.034
264	219.109	40.291	46.88	201.412	53.282	122.09	-19.227	-6.039	149.811
264.133	-8.808	4.795	30.039	133.439	48.87	-5.38	-10.942	8.404	193.743
264.267	134.222	-86.549	14.398	234.615	26.556	-11.645	5.247	-34.342	50.64
264.4	47.574	75.931	4.914	197.258	49.268	18.243	-8.872	-27.515	181.074
264.533	16.861	21.169	-0.376	184.583	44.939	-19.889	47.408	-34.655	131.028
264.667	140.144	25.2	-9.584	156.466	31.388	-99.994	40.298	-40.252	77.226
264.8	-56.239	108.041	2.74	185.66	37.982	96.155	163.787	-28.552	166.176
264.933	57.674	-149.549	6.235	154.41	8.574	7.555	151.197	-49.78	182.182
265.067	77.843	-61.224	-7.125	163.509	58.427	28.845	96.345	-10.749	152.008
265.2	41.863	-23.447	6.868	184.613	44.26	45.528	52.366	0.835	86.681
265.333	72.606	17.598	4.724	112.554	90.214	20.215	84.227	-41.254	154.15
265.467	74.472	-51.312	-7.421	93.601	41.327	56.665	91.248	-17.051	78.55
265.6	54.494	19.472	-15.747	99.992	42.173	91.278	105.877	-22.288	131.785
265.733	6.052	15.169	24.425	144.03	21.76	37.198	66.289	-17.385	141.747
265.867	13.006	21.14	4.813	187.779	35.309	20.49	128.184	-59.238	101.642
266	9.749	-26.044	9.026	173.134	36.698	33.606	75.049	-49.328	11.016
266.133	-2.686	83.354	-18.524	199.673	7.459	30.785	-44.804	-2.951	13.959
266.267	-16.734	17.068	-5.574	205.326	55.089	13.155	191.39	8.982	35.147
266.4	-116.032	21.135	27.414	191.736	64.397	14.528	111.178	19.053	22.754
[truncated: 1,677 more rows]
