# Supplementary material for: Precise optical control of gene expression in C elegans using improved genetic code expansion and Cre recombinase
Source: eLife journal article supplement (doi:10.7554/elife.67075), 2021-08-05
Supplement: supp [file PLML+ATR_1s_Raw.xlsx]

## Sheet: Sheet1
Time(s)	T1	T2	T3	T4	T5	T6	T1	T2	T3	T4	T5	T6	T1	T2	T3	T4	T1	T2	T3	T4	T5	T6
0	0	0	0	0			0	0	0	0			0	0	0	0	0	0	0	0	0	0
0.133	-69.835	48.243	226.708	-7.792			34.314	75.63	235.499	-153.291			137.628	66.344	64.019	-19.518	166.762	22.731	15.086	1.267	-68.164	90.467
0.267	-101.15	-12.241	146.251	-32.303			43.464	145.391	118.893	-11.523			27.87	16.214	164.148	136.804	107.081	13.13	13.23	32.474	-45.818	108.709
0.4	-37.829	158.181	53.586	-18.506			31.607	125.115	-4.779	25.289			138.675	18.542	114.662	-28.39	160.976	-109.455	197.153	45.928	-66.275	82.642
0.533	-51.316	140.026	11.501	-93.256			29.333	76.817	117.808	16.892			74.991	26.815	107.67	116.881	191.701	-53.667	281.593	8.991	38.924	68.547
0.667	26.768	87.74	-4.753	-126.37			64.779	16.334	234.036	8.507			95.991	-32.259	4.277	-20.119	241.042	26.692	177.049	-26.123	21.163	57.143
0.8	18.04	37.966	-55.279	-149.282			44.514	156.682	-1.608	-152.567			-10.828	23.37	238.192	-5.764	153.304	22.538	196.095	3.326	26.758	24.089
0.933	60.647	123.501	-11.723	-214.465			31.907	4.085	-6.731	151.048			14.109	42.696	-24.739	94.901	200.982	6.375	171.939	-19.055	8.132	113.681
1.067	111.223	112.97	68.69	-189.708			21.959	3.922	119.845	31.082			235.823	-15.606	190.392	-8.796	190.325	123.927	144.916	0.983	-130.28	143.634
1.2	77.171	11.366	27.876	-190.253			63.285	-31.121	40.667	129.279			197.964	-20.996	59.691	-44.238	172.618	68.341	94.536	8.078	-163.2	63.233
1.333	56.478	33.399	57.382	-182.111			82.955	-4.48	-551.693	10.964			117.572	57.153	68.217	81.567	100.727	28.605	131.318	-14.099	41.148	88.799
1.467	86.739	47.79	5.551	-188.305			59.112	-107.91	15.724	36.171			104.935	16.792	43.654	-22.1	129.015	43.074	69.494	-37.735	-100.145	81.098
1.6	105.385	62.606	8.677	-170.738			82.544	118.234	-137.489	-107.474			91.35	20.384	-26.125	23.873	68.935	25.462	174.694	-37.616	-111.867	58.073
1.733	48.576	125.965	10.048	-206.714			32.841	61.888	713.581	127.256			113.904	-24.178	50.279	83.64	121.284	31.358	200.423	-32.199	-278.267	59.969
1.867	14.225	103.456	31.865	-143.909			56.207	82.486	40.678	-8.2			35.335	4.225	73.872	5.62	68.492	21.032	252.432	-23.813	-128.448	56.523
2	70.528	72.776	36.974	-100.118			4.878	109.747	-298.671	32.941			96.904	44.518	67.918	-102.781	51.19	53.697	218.22	15.415	-85.627	37.099
2.133	126.303	48.641	66.743	-142.097			22.442	12.254	184.934	-17.559			153.527	42.248	90.241	14.227	34.344	68.36	269.253	-25.266	-176.213	61.545
2.267	47.839	89.195	-9.248	-165.914			-17.291	-52.931	301.657	-45.075			28.872	30.347	47.082	42.252	57.255	70.991	190.495	175.268	34.986	41.895
2.4	70.732	76.57	-33.122	-244.076			37.854	84.267	53.476	-17.471			77.787	-14.53	33.154	25.068	40.377	39.525	229.834	105.318	-96.67	47.523
2.533	86.684	34.15	-77.512	-271.55			39.813	21.286	-42.265	-26.19			153.654	22.376	-42.731	16.789	-37.196	22.845	296.494	29.454	24.71	63.543
2.667	71.15	57.305	-117.202	-198.073			-1.963	17.234	216.856	69.599			68.235	-13.883	125.139	37.158	63.644	69.245	269.191	129.187	25.933	86.786
2.8	64.252	47.673	-192.883	-235.407			9.921	-82.837	22.322	14.181			99.464	4.641	173.496	21.363	34.64	33.595	334.559	-72.32	207.336	45.886
2.933	72.951	35.637	-172.598	-104.271			6.459	108.48	-90.881	-71.592			38.089	12.725	124.128	29.547	80.467	116.05	269.996	83.397	-79.799	29.078
3.067	85.255	27.796	-172.542	-57.919			-82.449	-80.251	-6.298	47.842			94.256	17.137	53.421	57.625	156.026	202.092	194.472	19.839	228.702	-1.602
3.2	105.779	31.506	-264.785	-73.52			-333.305	16.672	79.694	54.785			74.835	25.138	65.603	55.916	106.422	147.828	224.666	-91.908	30.117	-6.875
3.333	78.544	95.428	-286.583	-76.504			-194.304	75.383	-103.12	-22.173			82.531	-21.256	85.453	-17.585	86.477	172.875	236.746	-164.25	43.981	-5.532
3.467	146.14	204.954	-228.172	-40.479			-40.544	2.709	7.828	25.713			3.983	12.544	89.39	4.801	71.737	79.462	212.198	31.52	155.461	87.399
3.6	104.076	-44.817	-209.911	-32.746			-48.17	-76.827	27.509	5.511			-16.644	45.433	133.722	37.84	32.048	2.375	214.69	1.606	80.919	26.526
3.733	32.53	63.342	-199.434	-21.636			-40.374	-9.493	115.715	10.053			98.436	8.457	119.808	-34.538	6.81	-33.083	147.232	-58.439	87.122	-5.77
3.867	31.151	138.97	-191.828	-73.836			-16.168	5.296	83.469	-11.214			-103.334	2.44	77.096	121.034	180.164	-89.465	116.904	113.011	-12.568	20.198
4	57.189	-33.156	-216.746	21.375			9.243	46.577	63.097	21.552			50.03	30.623	192.063	42.597	77.842	-40.75	174.972	21.358	32.482	11.488
4.133	107.719	160.619	-233.769	12.065			12.315	-89.83	95.762	7.689			-23.903	-101.07	13.782	38.611	-38.172	27.237	148.055	-40.043	-4.55	14.488
4.267	92.232	17.562	-237.541	59.95			-24.002	-146.65	47.747	-15.133			125.665	20.646	-57.588	9.654	174.135	122.188	163.919	-45.821	71.496	-9.229
4.4	30.15	45.106	-276.608	133.306			-5.075	-101.118	189.085	-16.9			-51.402	12.853	-87.82	34.973	8.059	16.062	270.575	53.69	-45.867	-4.773
4.533	104.656	20.345	-385.906	122.259			-18.41	-232.737	37.339	10.918			87.399	123.238	-27.189	3.771	50.881	11.358	192.347	-5.37	53.762	-8.714
4.667	83.171	37.975	-285.316	70.473			2.186	-47.223	36.234	-88.58			78.709	0.97	13.511	70.338	40.674	20.788	67.28	71.528	25.419	-1.655
4.8	48.736	4.099	-366.94	103.871			1.988	-157.93	30.142	84.94			212.588	-125.887	-9.783	4.198	-29.55	18.861	376.765	68.112	88.054	-9.274
4.933	10.866	20.552	-269.81	80.795			-4.592	-147.554	1.297	-100.808			-40.694	96.854	34.658	-17.329	162.814	3.308	124.627	-8.186	-54.237	14.396
5.067	50.567	11.264	-335.048	112.054			-5.346	-125.646	-7.907	112.197			99.235	15.165	32.473	-12.107	82.49	-11.871	207.309	34.887	85.948	59.649
5.2	-11.164	-4.535	-256.353	57.252			0.615	-191.834	-13.336	-9.547			26.431	-9.537	18.664	22.587	116.362	30.022	164.792	83.156	132.522	95.295
5.333	-9.135	-123.051	-141.157	46.945			7.45	-77.471	13.899	18.641			-13.104	-13.948	87.971	-11.409	98.473	79.522	134.941	128.605	-147.339	65.137
5.467	9.282	94.129	14.041	56.375			-5.513	-205.887	1.411	-7.782			88.984	11.15	12.091	8.093	82.92	66.686	177.553	-155.837	232.655	99.501
5.6	-3.974	26.843	16.174	53.809			7.053	-496.474	6.954	5.106			10.629	-18.018	-14.02	9.632	143.4	57.194	152.617	60.737	-109.649	34.502
5.733	-3.321	-83.602	13.405	192.429			-11.135	-396.039	37.318	3.41			46.713	48.237	208.439	-3.177	129.505	112.546	211.348	35.237	61.793	45.494
5.867	-3.992	80.457	74.864	105.163			-18.473	-386.866	110.719	-12.311			51.737	-37.992	-10.861	-9.339	63.317	147.098	220.491	199.496	-41.909	14.202
6	-20.606	4.878	66.323	74.084			9.851	-456.631	163.707	6.418			115.231	11.292	111.433	-25.391	127.455	69.866	191.726	94.07	28.843	28.794
6.133	65.394	35.889	2.666	189.756			11.188	-357.881	3.349	-14.69			106.067	8.498	200.342	-67.258	93.819	5.707	215.716	199.013	100.973	-25.277
6.267	-36.363	35.026	13.196	67.503			-5.479	-150.904	135.992	2.673			-18.251	-6.697	-54.946	-75.466	60.755	-32.742	224.951	-17.341	-48.675	-9.094
6.4	-8.852	49.131	37.986	72.786			-1.817	-178.678	271.615	12.967			167.569	-13.836	142.459	-6.206	113.103	13.016	75.604	-75.569	198.134	10.046
6.533	7.319	67.815	-72.631	71.179			-4.935	-174.616	-12.368	4.046			40.697	-95.183	98.829	-14.139	99.41	148.757	359.312	-23.386	33.357	2.619
6.667	27.626	106.998	110.63	48.244			12.488	-319.856	-75.066	-5.348			124.567	-23.41	108.3	-9.839	168.889	-42.041	215.262	-47.176	-76.851	78.013
6.8	1.842	80.614	231.739	47.312			-19.137	-302.484	-14.104	-27.651			179.025	15.661	50.634	-9.704	134.877	273.393	248.571	-26.902	206.282	9.757
6.933	7.229	89.613	-56.373	-56.723			-18.983	-275.016	-17.993	-33.121			91.151	33.871	17.827	17.709	87.374	87.121	254.222	8.566	-43.309	36.999
7.067	-7.914	19.834	131.837	-64.547			16.765	-246.294	137.731	-16.948			7.122	78.148	48.996	-18.008	69.924	114.728	221.211	-35.272	146.765	27.408
7.2	13.112	20.61	75.364	-59.717			-4.541	-287.265	-139	10.464			119.654	-3.497	11.749	-38.498	77.569	103.155	61.149	-30.372	41.933	54.795
7.333	-7.203	-4.883	86.284	-138.976			3.466	-258.271	138.54	-15.154			26.982	18.99	-14.787	-18.316	64.847	53.148	264.031	-49.051	54.246	44.383
7.467	-3.006	32.082	217.848	82.861			5.588	-217.859	-21.418	-44.788			84.204	59.212	27.825	-10.404	9.888	121.54	141.35	25.344	217.719	65.98
7.6	-13.837	9.675	70.158	-29.322			-1.516	-141.065	9.367	-26.576			19.889	46.864	9.747	27.351	74.396	106.306	186.39	106.294	-99.948	13.067
7.733	-68.53	-6.061	90.751	-26.477			5.491	-216.962	11.929	-69.352			94.2	-55.382	100.27	7.887	29.391	86.568	52.051	216.688	-34.617	57.951
7.867	-77.96	-10.27	72.544	-21.317			9.054	-61.478	23.904	-109.81			144.173	94.736	-6.113	30.324	38.895	96.892	299.69	-1.368	78.963	94.105
8	-76.723	-14.176	88.469	1.969			-15.619	-61.677	53.817	-30.157			71.084	71.66	-8.78	37.625	105.614	88.596	44.928	-47.685	204.036	71.872
8.133	-143.695	30.053	47.733	75.865			2.192	-8.865	-4.703	-100.209			63.342	117.27	18.176	22.326	19.824	157.732	322.584	-43.219	44.126	63.227
8.267	-168.129	5.197	64.699	-16.683			3.491	-1.451	4.292	-24.562			21.751	77.835	-5.025	57.881	42.697	90.193	129.568	11.938	48.209	18.786
8.4	-160.081	-7.14	102.439	4.081			-3.135	9.804	4.527	-83.777			64.017	38.342	-117.224	92.967	62.156	132.692	101.36	53.466	-5.886	7.328
8.533	-114.23	17.601	132.175	72.718			0.845	6.638	94.394	-81.102			81.97	160.419	102.78	8.527	85.861	100.576	130.412	-44.902	312.97	-13.279
8.667	-204.1	7.496	131.387	72.162			-9.614	-22.024	78.006	-84.727			35.28	-74.084	-112.599	11.931	80.749	62.011	134.672	141.481	-184.213	5.433
8.8	-183.123	22.181	97.644	143.208			13.437	-238.804	136.37	5.28			-12.689	11.612	18.96	41.595	92.276	216.294	121.031	98.864	-48.637	23.466
8.933	-231.109	-19.502	141.675	32.1			-12.357	-269.428	136.868	16.264			240.712	32.297	91.053	16.099	51.652	94.363	144.658	144.469	244.653	-3.18
9.067	-235.668	13.456	186.798	29.236			-5.191	-328.504	-5.668	-21.966			152.478	8.342	-229.336	12.807	125.619	122.391	150.381	61.3	16.973	8.409
9.2	-168.045	16.631	130.359	111.464			4.932	-234.303	136.48	-15.098			15.874	-15.291	3.112	12.276	103.232	75.263	173.054	166.897	230.474	15.219
9.333	-79.606	-7.515	171.456	57.918			-11.737	-214.604	1.352	-26.908			20.692	-13.143	-230.931	11.848	119.466	30.674	186.566	31.857	-57.778	7.471
9.467	-78.273	12.581	125.881	-2.084			31.958	-207.903	136.458	7.252			-34.688	-18.772	-47.649	54.511	82.987	150.935	132.273	48.785	272.081	18.348
9.6	-68.516	-115.257	150.428	-1.653			-19.454	-156.401	136.487	-3.945			287.203	4.75	-139.209	36.157	58.158	221.847	170.135	18.537	-103.489	8.97
9.733	-124.383	17.132	179.145	22.174			-55.133	-168.491	136.532	3.441			19.351	48.148	-191.878	81.829	73.427	59.51	137.912	-4.884	139.099	-4.856
9.867	-145.304	123.27	174.03	45.161			-85.822	-89.775	-0.763	28.457			51.35	-35.268	-288.886	108.179	65.153	90.919	144.457	13.988	-28.773	-19.097
10	-132.739	1.705	187.18	67.245			-99.195	-18.042	-2.88	14.558			79.731	23.59	-59.346	114.511	62.817	203.035	98.909	-3.48	70.68	27.015
10.133	-83.954	-14.698	-169.302	103.742			-113.972	124.369	136.66	10.438			51.475	166.772	-70.552	40.968	140.937	15.411	84.635	-130.783	46.794	70.555
10.267	-123.985	-7.501	-432.434	193.392			-70.776	126.032	136.511	-22.556			39.487	-87.072	-11.951	53.242	48.078	281.797	98.395	-39.646	-18.272	22.068
10.4	-124.649	-5.394	-69.946	121.874			-66.344	171.517	7.221	-24.331			81.153	12.434	-47.3	27.564	54.39	136.08	90.613	-154.516	-141.103	40.976
10.533	-136.776	1.976	156.963	142.101			-47.435	137.216	-2.025	5.631			20.14	32.763	4.707	33.74	73.106	159.772	117.361	-219.044	-9.244	-4.29
10.667	-33.699	52.588	169.312	187.457			-56.205	84.164	136.948	-22.038			53.872	-14.924	-58.942	41.457	76.139	109.971	105.349	-13.802	-4.429	24.66
10.8	-36.294	104.784	193.475	198.716			-90.953	101.528	136.679	18.042			-60.036	8.712	70.093	49.864	36.399	-10.175	-54.412	-364.613	132.888	12.797
10.933	-16.633	79.255	200.415	163.232			-88.308	113.265	14.716	-49.16			5.75	10.384	76.323	15.462	45.19	137.523	162.631	-313.481	3.196	64.745
11.067	-39.447	24.456	135.39	241.315			-27.26	100.481	-137.097	-51.959			-54.038	-7.299	48.136	57.181	-6.652	142.133	90.725	-240.126	-7.366	-8.215
11.2	48.322	33.049	230.123	200.235			-44.613	39.528	136.763	-87.354			31.44	-0.976	46.975	-21.958	34.834	78.53	328.193	-261.654	8.568	-0.981
11.333	-15.539	-11.444	232.809	200.062			-86.728	86.579	136.682	-35.714			126.609	6.286	14.696	17.135	1.867	74.899	65.891	-325.371	27.428	16.062
11.467	26.86	4.574	193.978	140.999			-55.407	70.657	-3.204	-83.166			-9.738	-7.504	35.399	38.149	-15.393	64.648	104.194	-213.214	32.714	21.094
11.6	-31.839	29.756	170.444	156.329			9.084	29.431	-5.46	-43.949			128.785	-7.863	3.115	34.527	54.866	89.625	87.418	-126.106	-85.277	-9.164
11.733	-41.619	37.843	153.804	89.98			8.648	9.268	-2.872	-80.472			249.519	-8.393	-17.767	10.955	12.876	97.97	88.946	-177.57	-20.924	12.788
11.867	-18.611	2.164	117.245	85.509			-5.384	30.183	136.566	161.35			-89.565	-13.179	36.733	77.646	8.769	125.434	84.449	-117.452	3.926	-3.786
12	7.997	-89.21	94.089	81.64			-125.461	8.179		-158.57			156.246	10.592	20.824	84.108	27.873	3.958	-61.805	-132.741	-12.883	11.57
12.133	27.639	21.221	168.556	26.353			118.835	-7.784		-143.78			177.919	-7.304	8.13	84.312	-11.289	52.177	138.767	-242.408	135.084	-46.333
12.267	165.867	-13.401	198.173	16.801			-36.816	-2.134		319.649			56.687	49.618	-21.019	19.97	-4.102	108.013	-52.569	-166.422	131.866	45.411
12.4	-2.294	91.415	59.858	33.32			57.267	-60.658		-160.708			18.094	130.356	27.319	78.465	5.919	34.477	12.646	-81.286	132.062	-5.009
12.533	65.708	19.041	99.26	30.789			-74.309	-36.661		2.54			37.708	-21.779	-16.039	57.29	-3.953	15.842	26.886	-68.654	132.479	-17.441
12.667	31.064	-9.869	115.408	21.635			-63.957	-1.324		24.84			152.6	19.162	-30.877	-136.307	-6.825	-170.941	41.827	-22.182	-0.969	22.745
12.8	18.207	-24.04	172.462	17.66			-37.365	16.094		-158.288			40.975	2.908	-55.525	-93.194	-11.04	-246.608	-23.611	-60.91	-7.207	16.943
12.933	58.448	3.948	121.763	22.895			-73.596	-46.916		-3.568			86.26	10.893	-236.683	-16.94	11.176	175.188	26.322	56.25	135.328	-22.663
13.067	55.35	-20.951	102.48	90.981			-43.099	-173.411		-158.731			53.025	35.029	11.848	-12.423	15.025	33.044	37.295	159.974	131.798	13.731
13.2	65.353	19.361	122.591	-0.943			-66.931	-197.386		160.563			47.069	38.213	-114.973	3.929	10.473	5.291	109.9	37.919	5.261	1.536
13.333	177.246	8.022	175.291	44.034			-88.543	-90.516		-53.715			64.251	91.008	-158.826	17.987	-4.169	44.079	-140.459	134.322	-1.514	2.473
13.467	113.991	12.883	226.051	-7.543			-86.309	-14.546		-31.456			75.034	11.848	-124.19	5.967	-5.102	-120.362	23.717	-93.38	-1.462	4.909
13.6	27.087	20.591	87.296	-15.584			-100.139	-76.136		7.163			37.005	23.32	-144.039	25.521	-2.079	167.892	-37.985	123.502	-131.392	-11.783
13.733	123.589	-95.043	45.287	21.164			-34.929	-32.925		-32.071			-53.714	-4.316	-255.199	-3.205	-9.172	21.785	3.588	167.249	5.419	-14.893
13.867	10.927	24.501	13.792	13.232			-69.929	-71.516		12.575			120.882	98.599	-40.884	5.473	14.152	-27.584	75.018	131.281	131.562	33.377
14	-24.858	39.701	-62.665	-3.336			-102.354	-8.562		9.478			-7.935	-119.699	-156.351	-3.51	-12.954	63.619	-124.491	78.95	132.428	11.267
14.133	106.833	17.016	-20.185	11.666			-87.785	-31.173		-88.2			104.095	34.529	-84.194	-8.779	-61.195	-2.625	3.747	14.872	-395.594	101.289
14.267	33.388	-6.864	33.847	-15.067			-108.788	-41.457		7.838			204.762	101.417	-36.962	-1.341	-141.757	-76.045	100.776	59.802	-132.533	16.778
14.4	68.975	5.622	91.704	22.324			-45.667	41.348		22.527			52.449	-106.624	-23.769	4.925	-199.446	40.862	-79.692	124.099	-332.669	4.094
14.533	130.707	11.278	182.959	8.458			-103.43	153.643		162.281			-20.756	64.434	12.455	-5.017	-144.682	59.911	222.086	123.475	-335.269	8.266
14.667	151.239	46.057	52.138	-10.162			-18.494	131.785		129.209			-97.008	59.637	-14.953	13.423	-113.539	-15.82	42.213	99.686	-128.183	28.941
14.8	187.454	32.373	59.193	32.082			-6.45	168.345		110.193			141.784	57.326	126.516	-20.846	-102.312	99.667	112.033	75.079	49.367	0.852
14.933	-13.591	57.576	68.016	11.492			78.072	149.609		126.74			50.157	58.958	70.596	-2.881	-196.969	141.028	89.623	32.264	-22.871	-5.864
15.067	8.806	38.514	21.038	22.109			95.969	83.408		53.75			83.303	18.019	43.211	18.199	-184.056	215.934	155.644	63.468	-330.335	-3.023
15.2	-45.016	19.418	13.664	-7.161			27.815	210.161		27.357			153.929	-5.644	42.604	-8.015	-196.516	141.281	134.258	184.658	354.311	-85.254
15.333	64.458	21.198	-29.633	-5.326			27.065	160.397		51.902			-61.47	37.627	-23.123	21.541	-125.506	96.983	105.643	-109.2	137.54	-2.203
15.467	21.132	103.829	-61.972	1.027			72.25	44.619		45.132			157.086	-147.264	37.315	-1.505	-148.907	114.419	103.237	47.701	251.743	-11.933
15.6	95.685	-80.043	-32.821	7.203			84.406	52.306		33.15			189.243	-154.926	-24.215	12.359	-161.349	126.241	129.745	123.056	13.409	-17.343
15.733	126.922	12.969	-10.045	-1.963			-137.441	62.379		22.139			67.143	22.628	3.788	-27.149	-183.137	102.537	56.778	153.377	-83.743	-11.779
15.867	48.18	11.691	-7.681	-10.054			7.722	133.184		18.306			11.547	33.69	17.154	8.099	-174.042	103.928	94.222	104.019	160.457	-37.459
16	18.842	119.323	11.134	-3.416			-12.244	125.427		-21.721			87.779	122.25	10.065	-5.892	-144.588	46.066	34.879	91.912	-217.127	-12.619
16.133	4.144	15.772	17.547	-21.102			267.209	124.986		-111.532			52.477	-7.402	-4.239	6.779	-66.016	48.335	70.507	59.632	280.713	-30.579
16.267	-28.697	6.378	52.167	-3.007			11.831	249.574		111.906			166.258	-25.403	-14.311	17.217	-32.713	79.188	3.933	96.466	30.36	1.665
16.4	53.034	-9.848	103.615	23.962			9.637	-7.69		-5.764			112.239	18.386	60.013	-15.568	35.464	118.831	-1.856	63.155	49.878	16.334
16.533	56.126	9.924	74.234	-59.803			-7.785	249.553		-17.118			68.515	84.51	-35.457	-8.306	81.133	123.534	-23.506	183.999	104.806	44.717
16.667	7.79	-2.519	113.555	-149.187			28.46	4.647		11.575			39.964	66.815	97.821	-15.296	-108.457	-139.358	-21.406	67.654	33.198	-20.993
16.8	-13.359	-6.664	220.344	-166.4			-27.759	125.209		139.706			46.35	12.108	168.379	26.226	-81.001	24.214	13.114	-97.264	-7.045	-7.289
16.933	-19.328	11.574	110.725	-111.834			-41.851	3.244		85.676			50.458	43.64	106.148	-3.682	-80.045	-87.168	12.687	-13.315	178.513	-19.932
17.067	20.708	-3.503	86.256	-62.451			-77.033	247.95		124.051			138.43	20.515	194.475	-5.699	-73.963	205.058	14.714	3.568	-10.607	-176.993
17.2	15.247	-4.686	88.032	-75.036			-142.554	125.331		26.892			95.99	-2.999	54.314	-14.766	-42.713	-92.204	182.059	-3.889	5.569	-128.109
17.333	39.791	-12.081	47.579	-78.58			-264.128	128.067		-90.151			44.347	16.995	190.855	12.996	-59.084	128.451	8.709	131.076	306.629	-149.772
17.467	177.105	9.722	7.889	-119.538			-125.498	248.713		32.898			105.274	64.203	159.012	-20.434	-83.024	-92.356	188.099	4.671	131.853	-152.519
17.6	167.371	-10.804	-36.065	-209.172			-279.726	-0.666		81.393			-23.381	58.486	201.089	9.382	-84.755	-6.771	-51.125	105.158	15.678	-139.314
17.733	75.909	-3.249	-34.883	-125.543			-192.007	124.925		113.006			121.483	36.406	166.367	-14.686	-81.142	-12.006	34.982	92.641	131.973	-110.858
17.867	21.662	7.84	-25.702	-82.495			-185.686	125.11		74.074			248.776	98.044	97.738	8.788	-94.049	176.405	164.823	84.555	0.355	-85.396
18	-7.431	-30.989	8.8	-51.765			-98.786	4.047		189.412			85.309	29.496	152.29	-2.667	-119.969	27.753	76.253	98.923	1.492	-58.217
18.133	38.898	-5.26	27.378	7.583			-64.246	125.599		56.487			-13.137	53.069	98.009	-22.157	-14.185	-2.469	-104.855	72.068	-131.152	-46.53
18.267	-26.848	-121.007	22.95	8.993			-48.594	125.218		41.359			71.251	13.954	83.783	27.245	-11.709	-174.246	94.944	-33.62	133.702	-151.939
18.4	-61.943	19.37	33.023	22.543			-47.638	124.935		-23.397			2.936	25.01	121.379	-54.76	-4.863	106.848	6.779	113.567	-542.424	-102.618
18.533	-178.449	-39.603	58.766	41.251			-22.299	127.502		-29.197			16.077	59.571	115.479	-101.101	3.508	-65.696	188.283	120.278	-314.304	-55.557
18.667	-178.897	10.53	85.958	34.179			-13.751	231.724		72.254			-152.867	40.311	233.191	-134.626	37.637	41.134	37.603	82.384	-534.961	-15.251
18.8	-79.797	100.59	68.107	86.286			7.068	143.086		-2.156			296.38	50.329	123.938	-88.51	100.196	-80.206	297.345	160.981	-650.796	23.328
18.933	-67.887	-114.654	85.938	66.721			28.033	184.353		13.035			316.314	46.475	99.42	-107.335	141.281	78.333	662.109	133.865	-408.83	60.469
19.067	-109.093	94.716	155.303	75.837			1.529	159.648		-6.849			12.895	39.535	81.431	-74.698	177.922	-110.639	560.485	59.009	-349.763	-76.26
19.2	-153.597	-56.755	190.2	160.924			2.105	205.321		24.538			27.911	61.392	66.32	-73.422	126.373	-49.217	564.339	56.09	-191.617	-25.685
19.333	-83.197	-128.113	173.847	114.053			1.258	130.468		12.602			113.543	77.011	86.266	-97.353	132.598	-319.482	514.325	50.04	-227.153	-73.037
19.467	-127.928	-128.782	133.674	106.51			18.609	122.829		-33.365			-46.388	36.54	36.793	-69.306	84.718	-100.616	514.052	24.018	-144.961	-84.678
19.6	-105.25	-106.826	60.712	168.243			-45.824	47.053		-22.961			145.003	29.66	-9.649	-108.76	46.554	-106.677	466.414	27.891	-52.089	-62.89
19.733	-129.544	-76.34	41.843	52.564			-101.897	74.078		-43.355			26.58	-17.007	-16.869	-139.477	9.216	-117.191	897.124	62.318	71.724	-100.763
19.867	-193.394	-82.601	24.618	111.436			-108.567	71.722		39.566			260.607	42.287	119.179	-144.493	79.791	-113.108	637.934	75.854	-239.205	-118.092
20	-159.574	-72.237	41.628	104.57			-89.509	116.029		-40.787			115.101	40.916	59.902	-116.951	-3.81	-123.284	499.029	261.883	-88.241	-176.201
20.133	-160.691	-58.43	-17.848	88.715			-77.781	57.517		-26.708			66.646	18.618	10.363	-96.041	-9.804	-56.146	513.281	-22.631	-101.468	-91.116
20.267	-125.101	-110.894	61.197	51.735			-34.576	57.489		2.688			96.401	64.03	104.036	-46.487	32.467	-103.763	431.818	-67.922	-9.502	-88.994
20.4	-174.983	-87.629	64.565	43.738			-50.09	69.004		-6.056			-68.892	74.175	101.435	-128.363	-25.136	-92.273	490.246	158.439	-92.29	-74.666
20.533	-149.68	-18.3	122.07	83.517			-10.936	70.337		98.466			56.917	62.447	281.788	-120.297	19.476	-24.282	473.14	-106.887	-122.798	23.675
20.667	-149.008	-30.552	56.245	77.215			-4.371	62.361		138.506			146.702	60.454	141.214	-133.911	1.997	90.53	467.759	13.083	-27.054	-5.143
20.8	-140.741	-44.271	61.4	99.094			-17.173	16.969		10.099			174.589	-17.81	132.763	-208.356	7.913	135.114	398.095	8.312	-78.183	-175.188
20.933	-70.123	-60.977	69.895	61.032			29.865	73.747		-7.414			-30.396	56.979	36.104	-35.81	17.441	265.524	355.058	-7.697	-16.244	-225.349
21.067	-44.511	-83.662	51.716	9.684			6.517	87.459		-38.798			87.528	44.211	248.329	-161.796	16.283	80.803	402.147	-25.975	-80.714	-222.862
21.2	-115.751	-55.205	57.242	48.436			20.369	39.98		-52.599			63.399	72.072	82.148	-32.707	30.706	57.325	358.391	-10.716	-164.519	-144.565
21.333	-157.069	-4.535	38.374	2.61			81.249	51.098		34.443			134.693	98.484	130.073	12.083	3.646	121.857	223.421	-5.766	-143.378	-114.782
21.467	-152.879	28.546	8.011	34.121			-28.368	35.935		94.582			25.712	24.608	91.328	61.356	27.595	92.734	429.623	-19.936	-224.846	-85.031
21.6	-149.727	-99.16	2.482	-1.501			38.578	15.123		50.98			98.033	18.233	65.826	160.092	55.428	32.377	427.468	-10.115	-69.711	-2.609
21.733	-156.712	6.564	-0.465	218.54			44.045	40.383		182.592			84.995	-16.46	61.403	244.529	33.128	93.589	293.214	6.214	-40.299	-24.415
21.867	-156.864	-26.115	-73.148	-80.431			86.489	28.079		36.976			190.827	-19.553	-44.435	202.649	-27.472	16.939	413.43	-9.312	-335.702	4.97
22	-179.458	-30.105	-144.036	235.205			69.173	-32.947		-18.31			128.649	5.903	99.672	15.471	49.071	78.788	459.531	2.691	387.422	-5.634
22.133	-185.852	-4.873	-291.446	-44.582			54.17	49.366		31.534			-40.642	37.151	-66.883	78.975	17.105	108.784	269.695	-23.876	88.324	27.65
22.267	-202.068	131.943	-254.227	186.198			42.051	35.717		22.296			132.565	15.566	98.253	18.827	49.99	62.418	201.152	-19.825	153.18	-11.281
22.4	-88.152	34.213	-257.421	-83.008			85.461	126.318		84.295			72.544	-7.884	-3.05	194.969	33.459	82.44	241.804	-35.826	81.218	70.182
22.533	-23.79	17.492	-188.719	185.465			64.568	151.543		201.133			126.756	21.633	-15.045	119.369	57.425	31.206	347.983	-5.989	90.782	18.164
22.667	1.824	21.076	-136.382	-82.255			45.595	96.466		85.458			181.172	5.716	-118.84	43.668	43.246	28.788	282.197	-30.427	143.306	15.566
22.8	42.352	17.355	-113.961	251.023			13.449	66.392		9.742			77.891	33.326	76.956	24.146	39.131	90.698	265.45	-111.967	86.005	12.647
22.933	-24.629	21.87	-179.18	37.699			32.368	57.853		7.113			164.869	66.241	-115.629	42.437	89.164	-23.922	286.607	-79.658	69.704	39.602
23.067	16.953	13.03	-226.076	48.77			16.283	75.859		-7.869			136.087	75.066	-46.689	31.755	90.968	18.553	403.763	-142.962	181.954	91.759
23.2	72.327	-75.52	-275.95	86.202			45.202	27.292		-34.368			182.315	-41.041	68.121	47.819	-22.194	49.52	326.934	-86.659	113.687	40.715
23.333	89.657	163.165	-276.334	51.712			77.319	17.99		-47.553			127.842	68.938	-90.71	31.733	242.894	34.001	309.818	-107.776	145.143	-26.186
23.467	119.82	-60.711	-274.158	72.996			89.885	28.197		-14.326			141.06	41.548	134.294	135.329	127.442	39.416	264.994	-87.421	100.75	56.597
23.6	35.362	8.602	-268.283	-38.269			52.383	14.169		-60.469			242.089	38.75	127.469	19.271	118.536	53.768	322.586	-18.081	100.652	33.79
23.733	-4.611	51.638	-179.03	13.605			111.438	-27.224		3.994			96.662	55.279	168.696	85.967	57.381	35.904	291.663	-157.327	118.527	16.893
23.867	94.944	31.662	-173.349	25.39			125.632	42.527		8.685			167.454	52.31	230.03	33.382	30.324	-29.49	279.382	-210.892	52.884	46.116
24	110.301	20.148	-206.371	135.441			109.723	20.226		114.43			176.415	268.514	14.124	-18.597	20.638	48.176	290.288	-202.347	-2.366	5.205
24.133	45.508	9.448	-189.463	115.947			70.629	-53.217		32.226			202.451	-100.46	-214.323	26.1	-5.534	119.246	266.299	-212.394	95.208	-17.54
24.267	246.85	12.308	-264.982	108.653			78.106	61.707		-7.44			115.627	67.808	-135.032	7.427	41.868	31.819	262.099	-239.448	13.997	-21.698
24.4	52.162	-16.457	-227.58	40.934			87.968	47.015		18.886			152.163	87.047	-392.284	-8.052	33.61	6.715	302.421	-273.635	82.353	34.874
24.533	65.611	-31.057	-232.771	54.282			31.907	78.332		93.54			53.579	65.485	-168.007	35.102	-57.41	28.254	322.127	-232.295	119.963	42.223
24.667	57.632	8.446	-284.971	30.85			57.746	38.959		130.701			129.144	42.859	-198.907	8.597	85.328	-1.16	294.058	-226.053	-6.345	122.037
24.8	105.796	35.103	-255.412	-116.09			41.709	31.828		81.374		0	266.8	40.984	-239.749	-12.476	85.461	-10.996	298.124	-212.308	46.24	33.6
24.933	61.179	35.199	-301.481	138.358			51.13	25.84		112.258		-143.289	237.833	3.153	-254.532	-5.637	254.205	14.106	240.3	-136.526	42.812	22.969
25.067	108.097	43.782	-192.653	-111.984			24.926	30.701		116.672		-148.837	73.012	16.861	-128.393	-1.394	119.515	17.389	297.286	-173.461	-85.356	140.345
25.2	105.324	20.605	-228.452	45.582			34.488	34.058		155.784		-25.933	64.337	51.453	-62.482	9	82.861	-3.261	194.485	-203.978	38.519	-22.951
25.333	188.625	29.245	-144.172	-23.664			39.112	50.642		305.89		-169.276	4.937	267.521	-116.406	-104.038	142.735	20.787	137.131	-86.362	41.354	41.821
25.467	126.388	19.147	-63.014	-38.49			-13.76	21.022		-277.489		-27.677	-12.555	-216.19	87.886	80.176	-47.904	-61.12	281.658	-139.015	-15.4	7.102
25.6	81.12	48.713	-31.792	108.362			64.406	9.597		14.383		6.928	-12.931	23.534	-20.706	-98.317	43.818	75.558	250.667	-80.037	19.224	14.926
25.733	80.938	130.056	-29.396	-1.709			-1.97	7.756		-9.136		34.656	-38.688	-4.367	67.877	96.386	-3.154	-37.811	244.494	-48.202	-37.21	184.52
25.867	127.572	39.113	27.45	-22.461			56.875	1.473		-61.388		65.953	-85.079	36.222	-4.441	28.731	21.243	13.153	198.633	-11.745	-46.893	168.77
26	97.887	44.747	99.37	-47.255			42.547	6.711		-11.073		193.048	115.295	-0.552	120.759	-3.582	-4.1	-24.361	149.952	22.936	-420.057	37.384
26.133	136.898	122.915	117.313	-115.15			22.83	-3.951		-28.944		-203.126	51.054	-12.099	6.3	-10.6	-7.941	-7.306	138.022	34.074	-287.974	71.352
26.267	44.202	72.078	132.1	-135.009			27.278	-30.899		113.57		-69.196	-70.657	-18.148	330.719	-42.676	17.264	34.099	174.463	49.236	-55.386	169.338
26.4	81.465	63.234	175.268	-254.933			27.238	19.331		-25.509		-82.28	57.564	-10.368	-2.457	-13.875	-8.049	25.829	228.314	54.969	-103.771	87.325
26.533	95.45	0.272	81.097	-257.779			22.2	90.734		-117.957		-13.771	20.708	15.958	124.165	-30.222	-26.987	52.399	229.087	-3.915	-84.256	38.354
26.667	86.787	20.8	124.49	-210.111			50.1	-31.382		-166.981		148.323	-113.267	128.622	232.622	-208.581	-17.904	-112.254	211.877	68.636	-43.03	116.482
26.8	36.057	14.463	137.298	-177.882			36.237	162.241		-369.288		-85.662	82.822	94.007	116.59	-268.092	-12.645	99.645	239.433	40.764	150.588	60.142
26.933	92.139	11.935	148.979	-257.749			28.545	-40.298		-213.684		-25.147	-54.654	-4.153	240.214	-268.68	-60.756	9.609	173.255	69.668	56.051	111.801
27.067	125.995	7.081	152.515	-13.385			48.013	61.599		-195.225		27.009	42.142	16.542	87.335	-162.737	-67.992	132.746	209.596	164.125	46.387	9.216
27.2	117.595	-5.295	111.107	-100.824			43.769	66.151		-127.583		8.172	-257.272	-13.653	182.807	-125.116	59.732	-111.161	200.034	56.396	31.806	87.643
27.333	100.186	-2.481	79.304	-114.004			44.029	25.722		-201.652		-81.312	-309.36	22.685	166.649	-169.251	5.956	17.641	185.039	29.786	53.25	5.731
27.467	101.396	-4.524	106.828	-100.536			45.615	8.317		2.831		61.069	-112.945	-48.932	-59.348	-225.997	-2.409	112.393	187.119	-33.891	48.522	61.328
27.6	111.113	6.139	172.494	-140.795			75.305	-4.588		-210.694		121.092	-55.169	-11.419	-437.723	56.6	140.575	-100.556	-12.907	21.299	103.408	31.496
27.733	97.728	16.637	104.139	-152.581			59.807	-35.408		-29.87		60.024	-10.349	59.223	-211.356	24.026	-141.455	-175.353	136.413	4.286	51.328	88.123
27.867	127.895	6.292	84.922	-66.405			44.846	-126.278		-224.119		175.379	92.009	61.846	-104.409	-113.038	-19.592	145.733	135.174	-5.83	226.805	114.913
28	75.372	-2.764	114.863	-70.35			28.888	-159.81		154.096		60.812	52.417	133.423	-119.077	114.049	-140.891	-24.124	269.339	-359.699	57.769	60.051
28.133	48.344	-17.738	105.805	-28.47			-8.174	-82.58		-354.089		61.014	280.146	-27.912	-12.755	-0.9	-6.112	36.273	269.083	-305.268	111.31	15.411
28.267	53.954	12.763	58.106	15.553			50.316	-316.459		-75.161		41.357	87.84	-114.116	114.618	381.541	-142.954	-46.675	134.572	-54.491	31.464	-8.853
28.4	40.218	6.015	22.499	-219			95.26	-126.445		85.605		52.192	45.837	12.527	4.46	98.81	-141.849	-142.893	269.115	-29.373	154.488	6.467
28.533	116.28	5.273	-2.232	-366.709			82.246	-207.458		-217.541		64.728	50.333	95.188	147.667	123.509	-141.659	-157.432	-22.636	-26.571	72.632	49.577
28.667	29.25	-31.336	62.595	-340.526			85.143	-178.221		-42.616		87.846	186.549	-103.625	33.319	134.829	-143.747	-67.813	134.225	102.689	-215.39	96.319
28.8	138.901	16.003	-7.862	-275.789			4.329	-171.891		-261.472		54.615	57.323	-295.056	313.211	40.413	-282.586	39.618	-15.045	84.41	-282.308	85.56
28.933	17.756	7.212	8.504	-221.465			59.285	-149.899		-53.141		95.62	41.751	-212.424	321.284	82.21	-142.045	-103.335	269.343	190.501	-234.72	51.476
29.067	93.305	15.609	16.329	-197.819			85.274	-111.749		-261.866		57.166	-17.69	-122.104	229.589	4.569	-142.476	-124.021	134.142	153.288	-360.812	123.519
29.2	92.707	9.458	-8.817	-175.311			21.428	-64.706		18.692		-124.913	175.561	-118.924	169.863	24.849	-142.034	-197.596	134.389	46.394	-319.813	115.083
29.333	80.752	10.689	-13.317	-41.195			5.686	-95.487		-219.7		-10.565	70.239	-23.977	114.787	88.82	-141.693	-210.133	135.707	156.166	-392.93	110.222
29.467	50.125	16.175	-5.621	57.218			38.027	-68.37		89.221		34.095	-13.872	-357.389	66.359	85.579	-282.883	31.987	-10.371	25.112	-231.623	96.936
29.6	62.538	16.376	42.829	98.776			55.253	-81.891		-64.2		10.031	42.677	-161.489	-38.808	41.051	1.194	33.421	135.359	6.264	-322.521	29.412
29.733	11.737	9.847	-46.309	127.836			29.951	-21.14		-6.322		23.953	15.851	-205.198	-10.405	120.582	-282.709	-81.746	134.137	18.874	-181.998	73.209
29.867	90.931	93.77	13.673	136.113			62.612	-50.53		-31.027		30.523	46.722	-167.386	5.043	130.393	-6.476	-182.761	134.155	20.466	-191.67	88.419
30	133.19	15.511	20.905	85.953			2.193	59.313		41.895		136.629	26.534	9.151	-8.329	21.605	-283.551	-100.074	268.512	115.542	-38.672	77.263
30.133	69.421	3.018	11.612	68.42			12.503	-32.527		16.752		135.142	79.949	-30.679	-5.795	35.153	-22.202	-105.219	268.541	86.598	63.999	34.297
30.267	111.889	22.418	-46.798	55.124			30.201	-19.942		41.373		138.59	-10.906	-18.342	-87.319	87.978	-284.441	-207.345	15.185	101.842	28.146	13.938
30.4	49.287	8.014	-53.587	2.156			-18.239	16.321		-92.928		-133.841	170.189	-11.799	-9.303	-96.209	31.649	-230.969	137.476	53.215	-8.261	44.389
30.533	58.084	17.384	-11.681	58.253			28.738	-59.459		152.07		139.21	210.645	-11.456	105.16	103.707	-142.564	-101.881	28.398	87.772	-39.444	58.003
30.667	39.987	-1.983	-38.278	61.628			18.753	-183.17		-5.2		272.436	149.888	137.603	-117.517	-38.974	-282.561	-128.955	135.745	13.806	211.383	-5.68
30.8	81.27	8.332	-48.29	51.044			28.419	-140.804		31.095		-10.63	244.181	-146.252	-52.829	-319.229	-7.733	-56.88	135.507	41.786	-113.109	-10.782
30.933	79.542	2.744	-167.006	77.797			33.335	-138.958		-122.284		136.534	292.006	21.537	87.622	-218.659	-141.341	-4.79	133.611	73.724	-281.546	-12.949
31.067	51.214	3.184	-225.273	93.123			-12.219	-103.979		-7.27		134.877	181.812	-36.272	44.45	-96.568	-282.592	-24.15	14.474	64.494	-129.653	-5.847
31.2	90.653	-11.011	-212.427	78.943			-19.214	-112.131		105.319		-1.094	246.601	43.756	-65.045	-74.697	3.545	16.966	267.75	65.804	-237.182	5.406
31.333	61.527	-4.601	-187.027	100.483			8.336	-44.615		-71.883		134.751	351.971	-47.471	-208.985	13.829	5.101	29.481	134.168	62.472	28.879	-2.354
31.467	33.617	16.445	-194.655	53.48			14.323	3.738		108.346		-134.396	312.783	45.698	-156.652	-59.442	-141.154	132.658	134.098	31.993	-84.718	33.483
31.6	28.999	17.612	-179.349	115.045			9.322	28.613		-104.582		269.191	502.214	139.827	-196.058	-35.605	-141.584	127.883	134.439	72.365	-86.748	0.88
31.733	11.935	18.648	-175.486	73.055			54.696	34.59		97.937		5.149	465.36	22.677	-249.691	-21.59	6.078	211.853	-133.911	75.385	109.107	-11.044
31.867	67.689	34.295	-118.346	67.462			24.297	65.046		-4.493		-134.425	410.211	35.828	-228.756	-17.926	140.818	11.41	-134.428	60.041	115.43	22.941
32	88.42	73.381	-101.88	31.62			8.958	64.92		-2.631		-1.839	479.8	140.717	-233.427	40.211	-0.23	24.553	-13.605	51.842	305.633	-6.416
32.133	41.294	43.567	-116.547	-1.866			137.447	93.301		-140.226		4.343	216.714	-40.048	-116.146	55.801	-7.423	23.776	9.304	37.394	188.333	-10.275
32.267	36.109	48.339	-169.314	-4.278			49.01	68.78		5.108		134.362	572.532	69.712	-215.366	64.835	-141.416	36.933	-133.534	-43.563	98.217	-68.281
32.4	19.521	7.105	-173.202	36.73			66.462	52.563		87.007		3.748	630.556	123.64	-161.969	43.226	-14.466	12.579	-266.935	176.06	204.085	-189.522
32.533	29.505	-4.271	-201.632	80.268			61.324	48.234		-104.105		-1.929	301.238	59.51	-26.155	50.019	-5.997	154.709	13.98	36.799	161.423	-188.885
32.667	11.641	13.871	-227.302	91.071	0		66.848	97.488		-72.931		-1.129	521.219	62.384	-8.402	84.409	10.431	43.261	-133.662	79.025	167.359	-249.656
32.8	27.257	20.343	-185.758	41.416	-148.004		102.362	108.485		-157.605		-1.771	334.139	82.024	-46.515	78.818	-141.633	83.864	1.975	-109.151	138.634	-201.297
32.933	61.579	8.687	-197.821	95.036	-14.51		84.39	54.232		-147.503		-0.156	516.55	16.799	-48.845	77.318	-12.46	80.167	8.585	119.009	158.585	-175.188
33.067	-109.653	9.77	-211.023	90.151	-150.766		105.204	-7.025		-215.668		5.608	373.173	50.167	-83.442	110.073	-2.091	91.712	-133.841	9.069	130.548	-178.527
33.2	-12.516	31.9	-243.078	66.166	-25.887		64.847	43.466		-108.237		-6.134	476.074	34.459	-113.081	53.449	-141.589	96.183	-4.101	55.179	64.501	-188.372
33.333	218.82	-7.343	-280.486	87.646	-27.486		-8.142	52.818		-72.339		134.415	454.878	15.948	-235.911	44.259	7.841	134.429	-134.038	-18.449	125.308	-167.245
33.467	80.319	4.399	-202.989	27.9	150.344		41.193	-22.831		-61.082		-3.238	338.617	20.173	-127.772	-14.206	-16.979	8.724	1.425	154.462	101.103	-107.404
33.6	110.869	6.682	-78.351	88.354	441.581		42.872	21.95		25.357		-268.93	359.4	22.725	-167.884	-10.286	-281.947	54.768	0.353	46.744	90.973	-200.059
33.733	32.6	22.623	-155.807	3.548	12.762		31.173	37.318		-23.336		134.483	334.744	24.43	-156.775	28.747	0.471	54.486	134.017	21.098	122.07	-223.309
33.867	21.468	3.077	58.707	-12.638	-19.381		14.725	12.301		32.947		10.444	423.146	68.513	-110.428	41.503	5.176	51.472	-0.765	183.031	37.181	-145.29
34	144.326	23.852	13.028	25.425	148.618		29.291	44.773		37.193		135.145	533.235	37.332	35.486	45.568	1.296	85.375	-133.797	74.337	125.191	-81.061
34.133	16.702	40.43	67.113	45.003	-148.157		16.397	16.444		12.695		-12.314	610.007	55.472	103.99	128.867	-0.047	188.288	-1.023	99.863	91.264	-76.57
34.267	13.291	49.15	99.483	2.397	147.707		10.224	-15.962		38.446		134.614	675.197	39.995	152.55	70.259	2.182	138.777	134.044	-44.368	113.116	-53.884
34.4	-8.892	-5.168	109.927	23.698	-148.438		-5.719	-13.097		57.39		3.541	347.082	-6.285	108.339	79.366	-142.132	75.561	-133.953	79.076	30.748	-60.516
34.533	-13.723	35.971	120.23	17.837	297.336		15.529	36.327		16.241		269.214	396.796	25.648	127.814	64.152	142.64	34.538	134.228	203.35	3.64	-27.036
34.667	-27.479	27.487	81.644	58.069	36.489		-13.609	44.098		1.81		-134.394	304.912	-4.854	115.308	23.417	-15.121	23.576		132.467	133.133	-35.316
34.8	-15.564	-12.729	116.021	19.373	-294.172		17.944	160.958		36.916		134.348	400.881	45.763	100.634	24.15		122.77		25.019	-122.608	-187.946
34.933	-61.117	29.202	58.62	11.916	-22.549		6.335	127.077		-14.828		-7.733	366.753	53.798	116.075	19.266		30.448		33.485	94.7	-178.79
35.067	-53.124	-10.068	109.422	27.876	-148.032		21.65	86.957		-6.416		-0.443	395.002	31.398	116.53	29.002		51.755		51.759	-36.815	-170.884
35.2	-92.883	26.684	258.97	57.555	-147.683		5.741	92.522		22.349		134.394	351.125	135.582	95.872	65.352		35.759		-25.032	44.308	-65.583
35.333	-210.369	-2.384	173.204	10.173	-294.758		48.081	59.006		46.992		134.856	516.826	96.547	150.628	67.552		87.063		22.723	-53.113	-77.065
35.467	-155.375	-3.055	204.737	-33.419	-147.306		6.117	108.305		68.249		-268.732	247.35	88.81	31.327	57.819		32.36		-101.21	84.948	-4.195
35.6	-86.338	13.46	189.246	28.342	-11.702		33.535	96.754		24.455		134.37		14.188	44.603	-14.18		86.636		1.605	23.989	-23.304
35.733	-48.316	18.496	242.433	45.192	-147.917		12.461	93.092		24.075		134.512		88.407	109.623	40.301		68.368		55.558	25.423	48.881
35.867	-105.959	15.165	228.901	60.712	-295.605		-35.939	95.251		-11.551		-134.378		25.005	79.631	-16.122		20.866		207.257	45.936	108.372
36	-249.262	-9.841	226.83	48.944	-148.432		34.868	90.172		20.518		-2.631		137.322	54.117	-11.347		63.083		48.807	22.529	79.506
36.133	-250.774	-12.292	193.488	71.634	-9.801		-173.785	51.754		46.228		134.334		110.46	120.828	15.035		102.33		123.826	79.953	108.112
36.267	-59.219	6.128	217.062	72.924	-147.868		-8.435	65.949		-18.704		-3.682		210.863	51.183	-11.908		50.687		45.916	23.718	9.215
36.4	-140.046	43.306	211.954	3.06	-0.695		-4.185	67.581		37.367		-2.98		169.533	33.141	27.75		55.879		69.381	58.384	181.937
36.533	-129.188	58.929	256.075	54.826	-0.6		11.167	44.598		28.966		-0.493		110.205	-12.379	-35.65		78.043		90.794	-9.552	49.392
36.667	-165.513	65.682	241.32	51.255	147.262		23.923	73.645		9.214		-0.363		189.642	17.838	-24.008		53.715		85.438	144.306	138.864
36.8	-179.065	14.665	221.927	71.227	-147.148		4.046	27.321		65.996		134.537		-22.032	5.787	-37.181		31.515		115.985	39.006	-5.332
36.933	-240.2	16.924	281.275	66.6	147.469		5.964	101.369		34.696		269.551		157.918	2.184	116.671		7.391		70.903	88.704	218.755
37.067	-181.353	-1.704	223.535	32.134	-18.23		46.753	81.147		29.056		7.093		224.791	-188.383	42.306		50.344		24.466	100.796	95.644
37.2	-124.208	8.821	85.653	34.659	-10.093		31.15	80.767		68.099		135.484		105.419	-289.203	39.512		34.057		-91.197	8.61	76.607
37.333	-129.708	-11.278	212.986	46.731	148.655		5.478	46.244		24.428		3.261		108.313	-304.347	44.302		75.975		18.6	107.958	179.241
37.467	-86.574	-2.966	151.002	63.979	-149.829		53.723	70.261		11.297		134.618		59.459	-323.65	67.339		184.358		14.349	98.523	101.586
37.6	-59.751	-20.474	190.325	70.483	-28.948		47.959	101.099		16.306		-268.588		65.926	-309.132	48.018		-50.79		38.61	-15.33	196.571
37.733	5.038	-34.564	200.147	69.622	-1.021		-119.232	65.887		16.382		-134.444		66.135	-314.984	41.974		79.833		18.006	216.51	75.473
37.867	-57.603	-35.881	158.773	55.317	-295.921		-164.625	49.058		32.417		5.194		100.59	-215.193	-16.253		49.628		7.392	-28.88	103.101
38	15.561	-9.211	147.365	40.48	-152.51		-160.726	50.068		-32.462		-0.43		51.808	-14.067	-11.098		-28.505		76.584	44.887	28.651
38.133	72.477	38.808	38.939	36.044	-293.912		-270.13	45.171		-5.512		4.868		73.913	130.364	20.589		112.664		19.869	39.139	61.109
38.267	57.908	130.976	167.566	-76.22	-4.267		-365.104	99.18		12.865		-134.534		44.071	206.506	35.322		31.469		19.465	269.007	60.715
38.4	58.966	19.972	156.718	152.922	-441.421		-206.135	123.178		17.532		-7.993		59.162	158.788	6.231		14.99		-2.484	47.698	27.031
38.533	20.879	30.75	141.416	43.208	29.561		-73.129	117.278		34.919		134.414		69.784	134.513	31.314		26.003		4.939	133.07	94.769
38.667	14.667	15.646	112.591	-50.653	-294.78		-66.341	64.198		133.803		135.411		103.902	207.133	-18.584		39.498		54.236	-337.895	42.432
38.8	56.245	16.341	87.236	30.075	-9.486		6.718	65.615		34.715		-4.007		98.117	225.623	-13.639		-3.934		166.032	146.836	49.425
38.933	2.331	-6.667	119.117	157.489	-147.53		-25.219	77.989		15.265		134.654		96.197	225.537	-13.868		-19.056		16.144	130.694	59.324
39.067	-12.719	10.776	108.078	-48.57	-16.063		40.474	47.402		-37.643		-3.594		110.717	113.836	-34.432		19.436		47.496	-529.099	42.585
39.2	53.397	-2.523	126.31	131.469	-7.484		105.121	65.272		-26.394		-134.376		3.634	113.128	57.546		-29.602		46.958	-180.139	95.086
39.333	116.038	29.582	203.167	67.626	-1.167		75.189	38.398		-29.591		-134.48		21.69	113.24	-42.342		-16.944		69.218	-17.825	111.506
39.467	88.386	-22.087	115.09	80.404	-19.819		43.958	22.674		28.724		1.743		92.091	113.148	-23.399		-86.059		-82.182	-77.142	116.411
39.6	83.614	17.344	-6.918	64.827	-18.25		-37.901	39.341		51.122		-0.47		112.795	-2.162	-41.159		-162.662		-13.498	49.946	99.444
39.733	106.635	-5.852	151.812	54.697	-147.308		-49.704	17.864		105.384		-5.815		16.912	-113.516	-13.431		-229.184		-21.247	14.273	11.869
39.867	71.245	8.927	141.594	46.813	7.515		-25.519	31.102		-84.456		-14.868		35.095	-113.164	-0.315		-169.999		6.172	63.248	70.443
40	67.042	-4.433	135.477	-80.619	-12.823		-32.273	-3.358		-50.402		1.455		11.311	2.981	-25.269		-200.793		-16.481	90.846	79.96
40.133	23.094	5.931	145.131	181.388	-147.515		12.763	-5.335		66.191		-134.58		12.95	113.149	11.623		-163.49		125.285	107.81	31.519
40.267	42.23	7.535	156.209	50.42	-147.145		-29.402	-2.454		131.699		267.805		44.065	116.206	34.106		-207.119		10.337	35.101	16.142
40.4	-1.659	-15.88	126.22	69.941	-27.668		-44.551	-29.995		10.043		268.733		11.836	116.329	-10.715		-196.61		-110.36	452.298	59.713
40.533	27.071	8.052	162.994	35.058	147.897		-32.516	20.381		-16.932		267.575		33.401	2.711	32.993		-100.769		-22.415	-42.223	40.1
40.667	25.025	7.971	153.59	35.303	-147.316		-114.01	13.164		-35.146		133.455		8.447	1248.27	-45.074		-337.833		-67.638	273.551	29.088
40.8	13.473	13.579	149.624	27.482	294.667		-106.356	-16.833		-18.661		134.796		-5.122	41.55	34.035		-159.995		-71.482	-105.47	38.448
40.933	-29.455	9.436	250.816	72.301	28.105		-62.112	14.871		63.435		-0.06		5.904	114.783	-13.513		-116.374		-62.866	87.472	61.17
41.067	86.116	-19.492	149.713	38.079	147.667		-32.267	29.152		47.531		0.963		36.353	152.665	-46.227		-125.309		-97.33	60.138	71.653
41.2	-14.557	5.359	44.008	65.866	123.726	0	-9.579	69.607		39.668		-134.378		-19.949	105.936	90.813		-179.061		-71.464	126.227	-14.034
41.333	49.652	14.46	174.291	53.507	70.7	-199.701	-22.189	82.085		28.904		134.851		42.019	154.741	3.55		-137.418		136.768	126.247	-16.547
41.467	44.439	-7.877	159.089	29.449	143.313	-170.389	-45.194	60.082		12.946		-134.995		22.981	105.787	-4.724		-119.582		-231.205	304.946	75.381
41.6	69.252	-2.056	290.909	6.507	130.251	-141.763	-53.7	65.178		-9.632		-1.254		35.073	148.06	9.122		-73.027		41.077	23.346	90.74
41.733	53.066	19.8	199.008	9.647	98.99	-127.322	-16.555	57.461		-7.267		0.23		21.118	134.951	-12.675		-249.472		-23.334	127.734	97.644
41.867	98.571	-4.022	179.027	75.447	97.656	-113.885	-29.26	59.741		-32.738		-1.159		58.348	223.611	26.404		-116.01		-211.742	-116.228	79.154
42	22.316	5.877	22.892	52.999	64.906	-144.619	41.624	79.626		-54.563		-3.68		63.767	230.255	-8.128		-87.373		-18.429	271.278	72.214
42.133	-5.363	-6.857	203.179	92.596	142.71	-204.112	21.371	70.138		-99.208		-134.34		108.399	242.397	15.767		-181.251		-123.063	39.841	24.507
42.267	57.455	-9.186	200.303	85.808	123.433	-170.883	15.427	55.564		0.656		134.808		119.374	240.231	-75.339		-203.249		-177.826	188.175	94.999
42.4	46.541	-6.741	159.433	57.826	27.383	-148.134	56.343	88.409		-104.482		-1.439		77.64	167.984	-189.448		-266.149		-219.199	106.959	79.795
42.533	53.008	-4.342	131.401	52.743	59.11	-106.282	43.534	35.516		-45.47		3.794		121.352	283.71	-204.762		-62.19		-150.215	58.798	32.546
42.667	49.27	8.316	308.469	43.44	152.11	-22.664	52.68	61.136		-3.911		134.781		48.108	200.48	-139.174		-160.731		-153.208	-207.325	95.76
42.8	76.71	11.719	-63.786	47.5	68.806	-52.427	62.004	84.567		-172.853		-268.08		54.371	146.545	-163.084		-151.843		-121.169	318.898	201.817
42.933	-15.606	-6.047	58.98	62.862	87.564	-96.236	40.388	53.506		-92.94		2.632		36.238	113.308	-239.811		-141.979		-169.189	3.864	-24.162
43.067	52.431	13.902	57.615	109.326	91.082	-125.214	-10.449	43.874		50.812		134.816		-15.289	127.475	-233.659		-119.398		-193.13	32.505	55.816
43.2	-13.515	-19.169	27.437	40.879	56.394	-58.705	35.384	10.374		-16.99		-134.157		-2.031	139.762	-73.971		-146.441		-183.635	-20.669	35.394
43.333	83.9	-15.694	44.378	36.206	135.442	-14.447	105.495	18.734		-38.093		0.867		29.215	77.529	-146.723		26.444		-129.986	-52.971	66.927
43.467	78.547	-20.881	103.119	8.358	-28.574	-36.462	54.012	45.571		11.672		9.853		14.86	260.957	-126.588		-55.826		-112.982	4.316	4.933
43.6	47.751	3.917	34.718	39.819	147.296	26.996	89.806	33.313		81.969		-9.681		14.797	154.101	-77.639		-110.699		-110.358	17.329	44.692
43.733	49.257	10.368	168.904	41.919	78.52	152.737	99.25	63.959		92.388		2.355		52.071	168.556	-99.849		-133.327		-16.229	-93.011	124.927
43.867	-20.677	30.937	-13.788	55.357	59.721	118.283	113.964	-12.681		-11.898		135.204		56.768	55.067	-39.672		-216.215		-53.532	-48.318	23.8
44	26.837	-36.059	18.842	69.291	62.241	150.235	95.677	27.568		-33.464		-2.21		-9.584	88.319	3.119		-235.746		130.228	-180.198	-10.894
44.133	44.915	8.199	13.249	35.765	2.766	53.849	7.307	28.595		121.141		-134.766		19.787	113.191	-7.553		-212.533		22.626	-176.562	-9.004
44.267	41.4	-1.576	-17.896	51.645	64.308	30.629	17.661	-47.685		138.239		134.238		1.391	171.529	-16.224		-186.118		45.703	-202.549	19.943
44.4	94.218	-6.803	31.508	33.493	47.949	80.906	16.179	145.663		15.022		-134.523		1.224	89.028	69.003		-21.341		106.454	-141.476	13.39
44.533	36.732	-2.731	22.261	9.063	28.435	241.266	107.542	503.591		7.348		1.41		-24.823	90.866	103.026		-192.876		28.638	-237.265	42.752
44.667	-12.314	-32.529	-132.83	63.837	155.297	162.216	64.188	58.481		52.799		7.842		-42.954	34.863	87.93		-254.885		48.627	-207.451	28.692
44.8	-88.141	16.263	-4.011	52.337	6.047	159.183	61.354	25.889		-2.017		136.642		-15.753	22.165	91.053		-80.669		-28.319	-323.824	12.245
44.933	-98.505	25.56	5.164	34.291	26.064	189.907	23.992	39.19		-42.982		-134.439		-16.486	28.741	51.17		-49.921		43.358	-116.694	44.916
45.067	-113.669	-13.667	128.161	27.108	-33.508	150.144	38.265	10.122		-84.767		-6.715		22.246	21.747	72.41		-73.658		-1.105	-127.893	150.172
45.2	-304.445	6.515	-14.621	28.122	-139.911	120.963	40.776	23.233		-64.261		134.819		-65.208	-3.366	90.078		-78.956		-38.551	-260.253	59.849
45.333	-70.28	-9.479	18.115	16.293	57.049	81.539	65.449	18.398		-24.257		-134.863		-116.429	14.433	83.464		-21.785		-14.917	-122.885	-73.856
45.467	-54.314	2.418	46.563	4.566	-12.269	101.227	106.952	13.502		-70.675		133.863		-146.924	18.617	57.754		-29.812		-23.474	-221.783	-14.098
45.6	-116.058	11.865	-4.12	-8.905	29.338	93.229	33.492	-5.159		24.952		-3.37		-156.722	-15.277	118.684		28.512		-23.698	-1.105	-17.491
45.733	-32.894	10.75	-42.921	16.123	74.185	149.478	63.884	15.77		78.104		-2.624		-161.473	-75.351	87.614		33.694		15.965	-24.445	23.347
45.867	-127.506	-148.463	114.23	43.391	24.148	169.911	30.393	-14.562		6.97		-134.435		-157.412	74.44	89.653		-11.204		9.472	-8.962	-9.378
46	-82.566	-94.53	59.876	-5.968	155.369	213.265	5.305	11.001		-7.555		134.318		-164.343	3.102	51.858		24.264		9.132	-31.619	-5.138
46.133	-209.378	-115.59	-9.844	-1.672	21.935	102.53	-9.704	-13.074		151.414		-134.507		-153.931	-88.253	26.276		27.352		15.341	-51.014	-14.502
46.267	-247.508	-110.951	29.544	0.991	27.241	101.624	130.623	49.124		-2.646		-2.417		-119.511	100.539	15.565		70.621		69.28	2.703	90.83
46.4	-144.41	26.411	89.688	25.389	12.153	120.344	19.78	73.044		-20.264		-3.226		-244.733	-5.785	36.148		90.186		10.683	-176.801	11.72
46.533	-173.28	-91.052	146.022	12.089	23.363	38.313	-31.129	26.451		-11.865		134.201		7.043	-34.729	19.431		50.178		-1.019	55.038	25.432
46.667	-178.392	-199.713	92.243	77.327	18.504	130.867	12.537	64.289		150.097		-6.212		-51.875	-22.389	42.775		-8.235		-132.691	123.658	-94.065
46.8	-105.181	-51.29	62.984	51.447	-3.627	125.626	9.548	55.102		-151.025		134.677		-97.442	17.461	81.341		211.186		142.813	124.965	9.313
46.933	-196.574	62.957	49.826	-36.712	32.015	263.247	132.55	69.858		151.275		-0.255		-144.233	-54.641	24.621		98.662		50.717	279.624	6.176
47.067	-224.629	-145.492	26.683	61.809	-73.537	96.251	-12.302	48.66		-151.368		-23.247		-153.207	13.984	2.115		176.963		-16.175	-12.687	-11.799
47.2	-210.829	-34.645	30.167	45.468	129.121	45.578	132.688	-1.622		150.192		133.77		-158.094	-14.838	65.644		140.915		-14.955	173.746	-9.921
47.333	-162.914	-9.605	114.05	194.393	-8.661	12.13	-15.709	60.194		-151.139		-134.38		-263.193	9.924	36.13		46.406		-18.273	334.967	-4.409
47.467	-61.374	22.177	59.494	-80.055	85.531	77.555	-131.178	11.004		150.383		-1.679		-78.829	-16.385	27.839		97.491		7.652	168.722	-19.035
47.6	-47.593	3.046	119.658	191.693	80.47	34.569	16.794	53.576		-1.35		133.39		-90.564	-115.983	36.715		54.581		-77.912	-178.379	-16.028
47.733	-52.987	3.889	58.387	-42.362	55.641	141.287	-12.839	46.144		-4.95		-134.531		-108.62	-15.042	-4.9		23.418		-131.291	218.395	117.933
47.867	-103.67	18.654	203.064	62.823	16.917	87.614	260.792	34.695		-5.812		133.933		-96.813	-2.917	26.186		60.064		-215.473	312.145	-2.816
48	129.345	6.121	28.245	61.868	13.248	48.792	10.856	36.343		149.461		3.677		-90.059	-20.46	4.302		14.577		-192.631	96.692	-68.314
48.133	-111.637	-5.083	52.031	62.236	-98.391	-17.822	13.147	7.312		-8.87		-5.854		-8.267	9.778	7.904		127.653		-189.75	371.662	-19.553
48.267	131.645	-8.158	65.665	221.853	-13.752	18.267	130.529	-9.553		-7.508		-134.465		16.485	-1.89	18.153		81.02		-142.268	-55.581	-158.098
48.4	-124.583	31.624	52.999	100.738	-7.689	68.418	130.35	6.857		-2.009		274.092		78.092	-17.394	65.791		53.323		-88.373	59.357	-187.245
48.533	24.711	63.199	106.227	84.09	-8.412	49.016	-5.698	4.703		-8.332		-0.75		112.976	47.18	-19.972		26.504		-37.993	249.875	-137.272
48.667	125.405	73.691	77.351	132.299	156.645	11.154	-6.607	23.029		-150.862		-134.906		110.551	-38.106	18.709		-7.118		1.414	134.535	-113.777
48.8	-125.145	69.925	90.806	84.588	40.856	298.426	15.48	-25.195		-1.842		8.058		105.049	-45.167	46.751		51.873		-47.588	91.643	-112.152
48.933	43.876	74.327	83.399	58.238	43.089	-149.154	132.278	-14.415		-0.23		-6.629		65.812	-9.44	-13.923		124.55		-41.194	87.443	-35.306
49.067	12.426	192.153	105.97	89.632	-151.489	148.275	-20.193	5.39		-1.959		-5.839		-15.962	52.744	-56.562		60.176		-36.063	179.513	-44.973
49.2	146.946	-50.279	116.722	88.824	151.435	-11.626	-131.744	-19.148		-0.525		134.572		31.562	32.192	86.129		21.837		-65.785	113.579	-77.563
49.333	8.631	181.995	91.468	87.089	3.288	148.511	0.061	19.954		-10.444		134.599		45.328	50.781	-16.751		-137.921		7.312	77.166	-60.268
49.467	67	-52.089	65.15	81.671	9.754	13.047	27.351	-15.307		-1.899		-134.416		45.469	42.971	1.401		137.459		-15.65	96.505	-146.036
49.6	28.328	-2.756	49.005	53.922	-150.9	149.282	130.844	3.422		-6.631		134.725		106.627	-6.232	8.525		16.242		-47.459	173.573	-131.811
49.733	79.021	11.957	56.794	72.017	6.135	149.458	-32.677	-40.612		-0.866		-134.495		26.848	33.676	7.676		-8.125		38.273	11.058	-125.516
49.867	35.227	98.361	89.932	95.63	152.817	149.053	-25.494	5.021		-1.903		-11.277		51.507	2.534	-44.097		-17.996		-17.573	21.967	-101.271
50	60.357	23.014	134.749	58.84	-151.475	10.303	-133.974	-15.136		-4.635		4.019		4.924	54.943	82.504		-71.337		9.704	251.602	-141.957
50.133	52.698	38.267	77.482	81.256	9.077	148.813	131.041	1.79		-5.394		136.018		79.361	118.175	-59.112		-135.703		4.06	19.942	-156.335
50.267	15.04	38.302	90.434	28.124	17.258	1.634	-14.9	31.688		-153.187		23.966		11.019	73.252	2.954		7.112		-21.004	-73.543	-152.557
50.4	94.073	-95.291	90.589	77.162	151.678	-3.589	-21.019	53.547		-7.862		8.641		1.951	63.281	-15.326		14.296		0.703	282.14	-178.632
50.533	117.72	13.966	45.891	64.917	7.566	149.033	-132.18	1.852		149.472		-134.415		-8.402	139.71	7.915		-1.391		62.01	161.356	-212.392
50.667	180.113	17.875	42.082	59.507	-8.199	11.392	134.199	69.1		-151.426		134.863		276.411	47.779	-55.147		-40.79		-14.765	130.7	-135.745
50.8	212.45	172.179	55.778	88.344	-4.534	6.755	-7.689	-11.568		-4.107		-134.715		-58.507	61.471	48.131		22.251		-95.111	-9.769	31.294
50.933	116.039	64.454	206.917	98.778	4.739	150.441	-131.134	67.553		-11.925		133.786		-31.453	206.884	-29.164		-6.482		44.88	130.106	-33.024
51.067	141.322	59.198	-75.618	95.791	3.214	1.325	130.383	54.529		-0.733		-134.13		-77.829	185.525	-11.173		-12.445		113.528	-534.182	38.263
51.2	84.492	28.484	46.91	75.386	2.565	-0.103	-10.066	59.401		151.139		-11.344		-158.646	77.979	-73.23		106.515		59.239	-267.948	22.027
51.333	60.75	-96.041	34.182	93.934	-151.947	149.268	-131.52	69.114		-150.813		133.088		-313.38	94.005	-30.937		188.663		56.522	-85.28	32.158
51.467	59.075	33.503	79.08	78.241	5.753	-148.867	-3.748	105.731		151.011		-2.221		-347.799	55.554	-42.561		251.956		107.862	-134.779	12.683
51.6	47.395	9.324	21.395	52.33	2.101	-4.298	-4.858	40.743		-152.363		7.583		-402.522	116.804	6.26		126.429		7.29	-150.867	-96.549
51.733	82.264	38.158	24.698	65.197	2.707	-5.14	-5.333	58.041		-13.427		5.049		-312.627	90.728	-9.625		251.309		25.92	-22.716	122.341
51.867	60.717	-3.364	142.592	70.594	2.155	-6.427	1.831	37.55		-9.759		135.337		-244.082	27.328	-71.223		8.366		-3.973	43.767	90.892
52	21.128	1.968	-32.685	41.596	151.069	148.839	26.244	-38.673		-3.682		5.789		-20.636	124.354	33.747		125.662		129.913	167.449	70.132
52.133	30.864	70.364	141.114	35.379	-151.092	-149.329	-14.801	57.659		-4.236		-134.468		-110.722	97.797	-19.457		250.364		-158.307	76.049	79.849
52.267	92.629	57.46	108.125	92.439	-0.612	149.323	20.697	-32.382		5.094		1.1		-30.231	107.947	31.926		126.243		-30.143	28.266	88.148
52.4	95.13	62.903	134.153	19.511	5.803	-148.925	-2.388	92.736		-6.267		134.819		-55.97	119.851	-25.414		124.991		-31.291	-20.109	136.827
52.533	118.98	48.657	-60.842	60.68	1.93	7.167	-19.248	22.334		-5.683		-134.388		-39.157	71.965	-27.541		-125.497		-7.615	108.719	111.418
52.667	123.711	27.706	59.582	42.234	6.05	-6.204	-1.752	35.923		-5.946		0.604		-155.975	109.197	-5.631		-124.819		46.755	220.439	47.177
52.8	145.555	33.582	205.155	31.68	151.387	1.256	-6.661	48.149				134.136		-245.204	157.212	20.428		17.937		140.305	206.296	59.248
52.933	155.716	37.276	56.324	48.452	-16.738	-10.032		16.904				-134.353		-153.707	122.485	-8.42		23.014		30.267	-148.248	34.46
53.067	154.536	31.417	130.459	93.943	-13.153	-2.328		14.736				2.836		-48.759	55.367	6.689		18.8		-37.015	181.509	97.531
53.2	179.267	43.657	65.206	71.479	-9.584	-4.531		50.192				3.734		-3.013	62.884	21.191		21.75		-111.618	111.096	61.533
53.333	132.138	37.177	56.653	95.138	21.12	-148.829		18.013				5.028		-34.932	89.85	20.281		978.318		-6.321	-29.17	171.189
53.467	136.062	35.228	70.827	47.598	-151.462	148.843		11.478				134.678		-26.408	51.561	-13.423		81.028		64.18	-63.373	52.295
53.6	146.569	40.928	72.535	15.463	-20.03	0.407		24.971				-134.395		-10.142	64.019	-34.248		256.618		-12.259	117.83	52.015
53.733	46.371	32.92	112.239	39.723	16.566	-149.318		62.483				1.143		35.719	48.978	5.46		215.606		50.835	-1.682	53.018
53.867	33.066	32.218	70.091	48.913	-5.079	7.615		45.942				135.568		75.189	74.959	-17.811		104.596		135.694	-30.839	-1.645
54	48.415	13.074	72.051	31.935	-2.049	297.707		26.284				-134.501		31.321	77.886	-7.352		89.556		36.351	100.097	27.331
54.133	17.305	43.539	-33.063	34.049	-151.178	-149.705		10.981				-3.996		145.492	95.333	32.563		19.183		17.113	-65.682	71.646
54.267	8.422	16.984	51.756	16.42	-151.213	4.217		16.975				0.775		161.969	61.086	-6.535		47.432		73.791	-61.912	106.126
54.4	49.476	13.602	199.396	15.721	-157.919	-1.602		31.793				4.591		40.001	67.092	-16.311		59.618		73.097	63.998	-87.03
54.533	22.229	28.16	137.24	33.835	-153.213	148.789		54.652				134.583		121.354	65.846	26.244		128.704		-7.997	91.267	96.446
54.667	-15.155	16.923	127.574	12.92	-303.001	-7.334		31.054				6.42		58.724	116.988	-57.704		199.792		128.373	34.162	113.034
54.8	53.176	-15.214	172.647	31.235	23.141	18.085		26.395				134.929		71.458	40.206	108.611		116.105		-62.109	7.756	172.27
54.933	41.348	7.999	157.348	40.074	-302.611	4.751		3.939				-2.755		52.061	39.083	40.245		120.204		27.311	256.362	138.4
55.067	4.172	-17.099	81.46	38.744	12.235	148.982		57.741				3.569		68.5	4.907	-41.971		156.349		37.701	256.768	150.032
55.2	14.153	3.162	49.157	-1.877	-304.17	3.192		39.473				-3.604		107.942	159.931	5.561		247.733		38.661	128.145	121.985
55.333	8.669	34.679	123.345	-7.166	8.29			26.48				134.92		105.859	70.484	28.097		58.511		79.513	-128.191	74.069
55.467	-25.612	11.503	-25.313	27.474	14.3			52.926				1.845		129.885	15.827	32.744		106.065		-14.035	257.31	68.09
55.6	-18.19	-6.762	222.148	6.818	-12.1			4.072				5.996		70.397	30.635	-24.644		84.78		26.798	-1.289	89.976
55.733	31.14	3.584	161.733	55.17	-156.509			1.698				3.488		106.199	205.042	92.246		54.344		59.03	128.105	60.803
55.867	-94.522	3.54	161.654	14.364	-14.711			26.765				9.418		156.535	-44.369	99.81		182.376		42.942	128.046	109.171
56	-253.062	11.47	169.844	19.552	-16.01			-7.289				8.609		101.263	75.324	4.066		55.623		131.562	2.324	124.099
56.133	-211.931	65.563	130.443	25.95	-2.878			2.621				3.291		167.355	121.385	11.173		62.947		22.72	13.984	70.928
56.267	-209.359	57.928	265.282	36.01	151.172			3.434				-267.917		38.31	132.789	5.125		75.142		85.462	-129.032	243.525
56.4	-157.472	16.564	130.449	17.433	-150.205			5.414				-400.16		54.154	91.479	49.118		81.807		-45.018	-255.469	-7.327
56.533	-265.101	24.208	22.201	16.211	0.287			-6.492				2.061		170.183	82.277	-16.995		100.975		123.607	-255.393	175.605
56.667	-156.166	77.342	237.353	8.361	-303.061			-20.364						70.086	92.016	-4.385		75.418		49.806	-376.736	11.878
56.8	-197.04	2.769	124.702	32.198	-150.366			-65.204						62.207	238.314	-3.902		82.031		69.117	-161.121	-93.904
56.933	-192.438	9.212	161.347	58.676	-302.374			-99.003						68.639	-15.665	10.065		107.081		13.95	-60.496	129.22
57.067	-165.617	26.744	51.538	63.057	150.602			-95.718						100.997	78.787	7.803		117.213		34.945	79.53	-9.54
57.2	-171.664	33.925	259.192	24.256	-4.084			-131.054						85.848	39.351	-25.708		57.673		43.729	61.659	89.197
57.333	-209.945	75.914	147.539	51.596	-153.579			-104.026						24.721	-4.799	25.127		51.902		16.875	382.896	8.866
57.467	-151.833	165.775	167.913	67.952	16.48			-62.594						-254.095	14.132	-7.221		67.032		70.674	128.635	-27.141
57.6	-88.192	88.036	199.411	15.89	2.926			-99.77						-250.7	-11.656	6.49		-34.856		-5.989	7.445	6.419
57.733	-131.929	35.155	171.074	17.127	28.048			-133.708						-181.335	38.726	2.169		39.649		67.504	128.714	-67.492
57.867	-204.589	44.865	168.167	19.608	151.845			-215.247						-168.282	124.695	-6.177		60.516		65.986	0.727	-86.04
58	-111.978	1.75	141.704	-18.512	151.235			-160.733						-103.41	-44.195	4.952		24.031		14.722	-1.609	-152.262
58.133	-109.053	-36.216	139.825	16.241	300.153			-146.255						-17.612	47.884	23.605		36.54		26.768	128.751	-218.659
58.267	-113.542	24.498	151.583	-28.182	-8.726			-97.467						37.011	-20.722	-4.011		-38.732		146.468	5.381	-87.794
58.4	-51.637	12.838	159.148	19.677	-25.369			-8.983						126.582	22.853	10.677		67.993		44.832	5.608	-43.079
58.533	-166.824	-8.046	166.157	5.98	299.425			-45.467						213.206	29.34	10.977		76.713		40.62	-128.972	7.039
58.667	-22.649	93.428	183.895	-20.85	-6.564			-14.207						208.812	68.212	20.43		39.455		25.575	39.615	84.872
58.8	-52.464	36.334	190.365	15.212	11.605			11.808						147.123	38.606	12.076		68.806		43.757	-257.002	104.693
58.933	25.834	25.41	184.155	-5.195	-4.958			77.284						142.087	-18.102	18.087		135.084		21.053	-286.17	-47.064
59.067	40.026	-62.839	184.978	-38.139	149.755			-4.868						111.785	92.251	-7.647		91.09		19.089	-148.653	146.017
59.2	50.754	2.449	188.097	41.807	152.426			-6.153						60.718	51.566	5.586		85.355		-14.865	-301.659	335.311
59.333	79.488	51.903	174.935	44.435	6.486			-2.594						82.4	106.272	-4.967		28.588		5.162	-288.051	81.726
59.467	46.319	32.954	100.947	89.866	15.791			-19.867						59.178	23.94	-25.911		8.766		-123.567	212.867	85.655
59.6	79.204	43.645	138.208	79.538	301.705			16.842						23.502	13.366	2.898		19.458		12.224	-62.559	28.017
59.733	15.467	51.518	55.998	42.491	1.729			69.428						43.209	38.773	-15.536		22.874		-10.366	37.785	10.465
59.867	23.04	49.774	62.63	95.051	150.944			16.865						12.487	72.775	-3.553		13.485		110.883	39.146	141.56
60	24.724	65.427	3.949	16.227	5.746			13.729						-14.756	11.357	-22.18		17.379		7.302	21.068	80.572
60.133	116.869	38.664	-5.445	36.396	151.335			62.169						18.245	46.069	13.965		-23.442		33.162	-16.635	85.385
60.267	36.245	119.885	25.699	38.814	-151.058			73.461						-136.434	97.66	-30.737		5.543		5.432	152.59	-4.324
60.4	190.926	43.185	34.457	7.569	151.786			46.353						-174.139	43.369	5.211		23.843		19.924	15.889	-5.28
60.533	64.353	4.356	-26.869	8.957	1.397			110.865						-110.604	17.309	14.449		56.824		-14.596	-62.315	81.01
60.667	62.138	22.429	-46.367	-4.533	7.488			116.324						51.807	-1.213	-0.955		64.639		20.363	-8.729	-26.535
60.8	57.292	21.447	-209.062	-39.394	151.063			104.825						31.922	12.714	9.771		-8.877		-122.877	-216.825	-126.298
60.933	14.852	89.884	-237.797	-137.76	-151.265			101.688						-50.453	-16.804	-7.431		43.624		-51.941	-5.532	-218.297
61.067	79.515	81.612	-248.895	-175.569	151.274			67.228						-32.784	-3.925	13.347		59.612		-32.86	216.955	-221.575
61.2	71.669	101.409	-332.5	-142.821	-151.571			33.728						69.198	-18.71	-0.951		43.953		103.29	-48.002	-181.523
61.333	297.476	70.048	-272.114	-195.285	4.762			83.074						87.739	-72.862	21.207		37.617		-132.502	-19.192	-172.826
61.467	93.745	30.232	-257.724	-182.912	8.884			87.755						164.752	-72.393	10.763		18.189		116.289	14.464	-162.028
61.6	110.49	17.756	-274.111	-182.728	12.069			33.186						247.126	-121.448	22.373		16.507		-31.496	29.857	-247.35
61.733	71.376	30.1	-284.908	-153.483	-1.596			9.395						99.858	-111.655	-23.101		-7.32		-17.571	32.508	-175.67
61.867	72.587	20.797	-227.957	-99.993	151.024			23.155						56.306	-125.869	-3.255		-11.965		1.407	24.769	-141.597
62	40.286	40.99	-248.074	-46.765	0.837			8.087						12.582	-153.899	19.722		51.613		19.57	28.375	-36.242
62.133	69.112	27.371	-30.951	-57.86	0.788			2.264						97.999	-196.303	12.364		-16.891		-135.879	-55.351	61.81
62.267	83.244	-2.47	30.431	-90.919	-151.045			-8.441						218.418	-177.787	-5.89		23.318		127.954	194.761	11.313
62.4	57.98	16.82	39.912	-103.85	3.143			4.184						72.127	-128.066	-4.184		-19.858		10.298	101.121	28.624
62.533	52.164	56.776	79.372	-156.565	0.174			37.878						91.222	-119.507	-12.886		39.546		-18.705	-15.823	-91.258
62.667	120.404	51.327	142.471	-195.257	-151.202			13.169						3.22	-40.095	13.197		18.651		2.967	20.095	-9.948
62.8	66.131	38.128	111.446	-172.455	2.25			51.459						-21.592	28.092	-19.503		9.063		10.919	-15.35	9.643
62.933	125.86	24.174	102.399	-143.175	-8.058			54.997						16.887	45.966	-34.794		9.401		-0.572	-9.822	-13.886
63.067	125.099	-5.045	167.917	-87.82	-151.147			34.467						15.934	103.612	34.205		27.775		-25.013	252.805	-26.692
63.2	113.488	27.29	92.618	-108.717	151.386			9.034						-161.99	17.497	6.773		15.566		-1.485	-126.184	-138.817
63.333	121.507	29.845	87.539	-107.14	2.765			44.373						-183.293	136.352	-3.586		42.214		1.074	17.404	-194.704
63.467	152.338	9.03	47.95	-79.772	151.797			7.273						-481.362	201.544	-42.684		47.892		-9.098	-220.943	-217.624
63.6	114.48	31.312	102.15	11.227	-151.275			11.237						-286.023	79.041	14.421		22.467		-5.356	-108.199	-258.57
63.733	80.111	-7.09	115.329	-14.844	4.263			38.525						-321.392	73.747	9.918		12.884		-34.682	-66.699	-244.946
63.867	26.11	48.972	267.843	-86.247	0.955			-24.317						-321.855	63.64	31.161		15.396		9.592	-144.869	-191.15
64	80.839	9.427	116.083	218.601	150.911			18.852						-371.264	98.875	44.644		-25.161		-22.13	149.816	-25.747
64.133	82.985	-7.23	103.804	45.136	151.061			-24.858						-360.93	50.948	16.107		-51.293		-128.246	-65.836	-28.644
64.267	47.333	-15.05	161.699	28.653	6.776			-20.94						-222.906	25.001	10.472		-115.508		-50.841	-47.258	-36.065
64.4	48.214	29.899	132.714	73.662	-151.128			18.814						17.44	-12.079	15.401		-121.599		-108.505	83.469	-14.973
64.533	48.525	-9.806	113.939	34.763	150.979			-3.144						-37.214	8.842	-4.186		-76.99		-130.949	26.672	18.545
64.667	107.76	23.898	104.292	56.366	-151.055			-48.652						3.963	-42.883	11.527		-68.457		-197.999	47.788	-25.896
64.8	52.257	13.719	80.891	-102.386	-12.207			-101.802						26.395	-54.473	9.946		-62.188		-120.775	176.24	61.515
64.933	71.856	60.334	141.188	97.948	3.962			-120.991						56.687	-25.898	-7.369		-73.491		-103.817	-117.865	54.365
65.067	7.686	3.565	112.561	186.211	2.266			-128.04						31.054	-20.44	2.352		-77.281		-129.209	68.801	-1.55
65.2	71.777	76.699	141.601	57.996	2.919			-117.028						70.824	60.248	-104.002		-29.092		-82.128	185.878	49.88
65.333	76.672	13.233	123.155	28.118	7.13			-133.345						136.287	-249.877	-112.047		17.316		21.407	-15.555	67.501
65.467	86.469	6.942	91.882	14.771	1.78			-119.873						26.757	-162.942	-134.634		5.491		-217.919	52.674	-1.134
65.6	-88.575	25.599	101.062	29.423	151.558			-174.228						64.466	-195.173	-88.483		-37.238		-20.744	275.233	87.299
65.733	119.31	20.751	93.332	32.99	151.233			-123.137						12.262	-131.288	-200.456		47.773		-33.127	38.087	56.757
65.867	157.832	-3.195	83.034	65.834	4.155			-106.391						36.489	-39.8	-28.267		71.868		28.42	75.667	64.236
66	-57.192	-28.95	67.739	17.729	151.038			-73.029						-12.758	-18.287	67.88		253.475		5.316	252.591	108.722
66.133	185.697	30.801	68.939	9.489	-151.057			-84.558						39.557	-27.62	-16.269		135.002		17.407	21.968	70.574
66.267	13.484	-66.158	83.018	-12.452	151.028			-57.445						-3.427	108.49	-47.649		101.726		18.324	-381.888	97.18
66.4	4.893	-126.189	120.648	25.064	151.022			-78.631						13.763	148.588	-15.536		108.518		63.365	-616.235	75.469
66.533	-27.041	-141.724	112.913	13.264	-151.086			-64.938						39.956	222.318	5.374		57.428		76.503	-127.513	73.781
66.667	4.226	-220.584	57.031	3.081	-0.653			-58.158						-18.703	348.449	-21.062		48.815		129.361	-136.588	91.834
66.8	12.846	-110.971	17.447	-3.419	-8.107			-94.778						-49.418	109.096	33.862		104.959		87.324	-236.323	87.071
66.933	10.324	-57.187	123.431	-125.257	151.024			-90.246						-141.55	149	26.893		62.687		104.486	-264.49	8.417
67.067	-6.441	-42.407	251.144	164.722	-151.153			-80.622						-109.008	118.396	-30.503		51.915		48.93	-30.703	126.74
67.2	31.39	-58.017	81.899	48.855	4.976			-120.899						-137.907	57.828	-12.398		68.85		146.324	-10.73	154.499
67.333	5.381	-26.125	159.972	39.391	302.174			-220.84						-95.325	103.955	9.633		153.204		255.832	-29.691	235.981
67.467	-135.238	-24.268	156.961	63.131	-0.337			-115.861						-235.087	83.245	26.807		143.019		-16.101	57.657	203.304
67.6	149.434	5.285	128.214	43.41	9.772			-134.795						-163.935	-21.039	15.146		106.739		178.369	145.72	193.719
67.733	-7.594	11.19	147.519	61.495	-301.973			-96.587					9.388	-159.459	54.577	81.036		0.769		71.057	129.903	149.588
67.867	4.333	20.762	114.789	33.986	151.079			-81.212					135.69	-205.609	115.271	-45.718		31.474		79.713	175.475	114.588
68	13.679	-59.899	80.814	87.95	-2.305			-45.163					129.225	-205.099	93.434	48.742		36.44		-24.116	-29.425	163.056
68.133	-36.015	-14.502	118.984	22.315	-0.303			-67.8					388.658	-92.462	-250.623	-57.127		62.87		47.62	203.86	233.958
68.267	-17.307	42.189	111.737	74.076	-0.258			-59.531					136.344	32.695	-167.839	97.898		57.364		-9.277	124.293	-7.133
68.4	-34.292	23.411	99.352	107.039	-0.466			-43.789					128.338	11.813	-177.1	-86.808		128.74		3.311	11.554	194.55
68.533	-98.692	-11.366	64.314	8.183	0.529			-15.115					262.675	-128.056	-268.085	-52.851		5.413		25.522	40.642	122.702
68.667	-163.995	20.029	89.516	36.359	3.341			33.393					265.616	-305.235	-214.287	-61.399		-13.898		-6.258	160.677	80.175
68.8	-166.57	38.612	101.897	42.858	-1.809			23.672					261.817	-249.739	-172.479	41.572		-22.838		6.149	243.444	128.8
68.933	-68.458	50.662	105.536	57.155	-3.557			9.804					109.424	-282.526	-187.846	-31.485		-22.312		-41.19	-125.626	125.717
69.067	-94.622	90.381	108.836	88.039	-151.056			11.628					266.38	-104.219	-248.812	-142.464		-144.702		-8.605	248.483	95.226
69.2	-80.074	43.796	124.615	91.234	151.014			44.741					270.835	-125.757	-191.351	-118.909		134.931		-33.316	5.84	65.37
69.333	-19.976	-8.434	81.129	34.009	-151.228			129.232					234.798	-138.686	-177.854	-78.743		-255.451		-30.143	123.909	22.019
69.467	-28.198	12.856	62.592	35.171	-151.319			148.52					421.118	-58.329	-180.943	-33.651		45.579		-55.819	23.227	-9.862
69.6	15.042	29.587	38.591	39.094	151.023			184.511					271.899	-25.966	-116.193	-37.271		-30.086		-20.642	123.934	169.924
69.733	5.547	3.429	87.54	25.416	-3.842			123.202					241.604	-20.277	-67.462	-141.969		3.764		-19.964	-17.166	74.238
69.867	-23.726	6.163	77.785	64.655	0.482			155.542					263.998	-598.621	-71.324	-127.705		30.449		-98.197	20.429	108.677
70	7.039	4.82	109.157	6.102	0.663			122.316					350.44	-107.348	-100.499	-6.676		158.313		-118.694	1.98	101.863
70.133	-70.047	18.88	117.088	82.181	-1.143			20.657					214.863	8.88	-87.27	-21.194		109.95		-289.815	123.516	126.675
70.267	-122.579	12.324	89.057	53.964	-1.432			114.772					202.799	78.61	-118.256	48.389		94.864		-116.435	-1.393	72.938
70.4	-75.757	19.963	101.201	66.395	1.192			67.169					207.635	-7.418	-55.492	14.68		58.3		-200.369	-1.799	130.915
70.533	-69.852	9.39	62.792	15.696	2.998			129.529					183.414	-73.252	-12.828	38.094		209.904		-268.388	-123.338	9.391
70.667	-46.109	35.171	110.636	50.104	-1.69			121.2					183.241	25.431	83.874	10.505		122.18		-173.391	1.006	67.512
70.8	-38.059	12.234	186.659	51.888	-6.482			73.582					185.186	199.973	77.493	59.299		95.601		-161.604	-364.376	33.683
70.933	11.497	38.351	50.845	42.838	151.107			32.401					33.92	122.963	84.446	47.796		95.48		-139.093	123.283	10.966
71.067	-6.291	49.339	-60.624	47.199	-302.01			89.534					105.51	46.195	92.959	87.944		38.96		-89.64	-246.053	-20.943
71.2	35.388	46.184	181.552	51.122	151.045			-67.798					207.632	34.4	34.951	125.883		104.904		-41.906	-165.923	-15.388
71.333	92.149	35.903	-29.935	-3.338	-5.67			105.95					137.74	23.239	89.382	133.012		130.591		17.792	-280.432	27.27
71.467	51.281	46.063	76.853	89.917	-2.419			-18.628					155.692	96.874	45.576	27.564		58.841		-20.679	-257.091	-35.241
71.6	85.235	50.929	189.115	59.668	-1.773			2.212					202.797	93.349	21.425	86.648		100.757		-6.27	-255.643	47.058
71.733	52.312	48.444	99.192	97.736	151.067			27.735					201.08	77.781	47.375	27.944		99.694		4.71	-249.946	-23.877
71.867	76.45	-85.333	-36.509	98.766	-151.326			54.055					195.367	105.933	83.115	68.133		67.505		29.94	-219.148	-35.458
72	32.14	138.56	16.658	62.69	-0.226			-72.21					143.213	78.564	54.608	145.411		5.533		50.383	-203.461	-33.632
72.133	76.802	-4.352	32.961	39.095	-12.196			7.793					134.842	37.739	58.237	69.851		290.775		8.887	-126.767	-142.759
72.267	77.657	8.918	193.326	66.797	-6.888			63.922					140.863	98.179	23.546	65.896		59.937		21.436	108.596	-242.883
72.4	49.975	-6.638	90.09	56.523	-302.315			62.299					112.609	144.546	208.966	38.86		63.004		17.071	251.084	-131.144
72.533	25.15	15.908	116.782	44.12	-301.977			105.998					72.55	175.947	63.827	61.393		-27.854		79.228	220.765	-76.259
72.667	3.791	11.811	190.786	41.768	-452.154			-9.847					62.547	102.628	63.414	27.633		75.947		62.611	132.233	-98.123
72.8	2.092	23.589	96.605	104.824	-151.345			34.967					162.694	69.382	127.574	88.208		101.361		53.113	202.45	-143.901
72.933	-12.022	44.465	128.734	49.622	-2.157			13.99					-13.838	119.235	135.921	58.441		60.923		170.389	24.02	-220.368
73.067	17.465	-76.803	101.668	89.449	-151.211			77.156					219.422	110.063	152.058	36.935		85.354		41.152	-169.581	-299.415
73.2	10.21	56.975	181.831	62.555	151.439			-3.011					151.513	139.881	-37.472	-3.535		140.731		72.292	-130.598	-164.841
73.333	-31.708	64.934	138.147	54.543	-10.25			70.483					155.906	260.662	204.534	72.588		-131.388		98.578	-129.144	-190.926
73.467	7.906	30.953	32.79	54.834	-151.203			52.864					98.4	5.048	74.018	-41.485		193.613		40.668	257.859	-124.817
73.6	-2.691	116.093	86.329	27.566	5.041			62.542					134.996	131.049	92.086	95.298		20.426		33.662	299.118	-15.655
73.733	-20.836	-111.869	129.088	15.367	7.106			75.799					59.807	5.759	16.329	45.517		2.558		40.911	179.472	-287.619
73.867	-53.007	111.781	110.896	62.665	152.18			60.12					118.203	130.594	152.594	-14.151		-5.086		36.372	168.146	-196.676
74	-111.251	10.667	163.408	54.889	-151.032			104.593					69.769	2.908	-36.052	-19.005		-3.314		40.22	150.565	-127.927
74.133	-131.94	-17.823	72.786	38.512	151.613			-28.316					147.591	-18.386	47.585	8.079		62.099		50.808	379.301	-172.517
74.267	-130.591	5.141	-70.051	62.037	-151.298			143.383					50.266	-0.263	23.611	-2.465		75.656		72.239	7.695	-93.071
74.4	-148.505	-0.518	224.255	83.2	-4.664			8.684					32.427	134.421	4.348	4.108		64.313		71.906	-0.872	-139.687
74.533	-205.18	2.786	73.57	96.489	-2.791			90.164					31.005	15.302	37.52	24.843		129.728		80.41	126.126	-140.976
74.667	-194.466	15.609	28.546	72.394	-9.224			5.657					35.136	223.729	143.928	29.495		63.751		128.222	124.972	-30.921
74.8	-186.609	-3.569	63.764	66.431	-5.845			4.294					37.935	-234.786	80.86	-12.606		68.922		14.893	-4.776	-38.258
74.933	-134.02	14.785	-72.46	57.225	-11.504			-8.357					101.319	71.384	153.959	-0.391		45.695		-21.366	-2.252	-50.345
75.067	-196.898	-6.105	71.709	82.235	-3.738			39.835					38.728	197.843	68.01	-2.682		25.145		50.4	126.741	34.356
75.2	-150.385	-117.477	80.538	127.246	-3.069			2.588					50.091	52.607	59.315	-9.127		47.904		63.702	377.644	60.869
75.333	-99.003	-7.175	159.686	104.259				45.351					112.231	87.209	21.443	-14.465		53.372		91.436	-252.08	27.721
75.467	-70.361	-13.037	19.888	102.975				12.875					20.346	106.061	85.295	-9.507		36.262		89.153	-8.576	175.786
75.6	-28.178	3.05	107.279	65.599				72.462					73.358	119.511	45.046	12.494		41.804		94.561	125.869	44.494
75.733	-52.363	-26.213	168.039	50.086				-5.141					115.182	70.991	52.661	-0.751		58.77		89.771	-0.991	126.682
75.867	-135.516	84.032	113.532	50.363				8.905					36.25	47.232	53.949	12.048		1.498		14.45	125.926	100.07
76	17.646	-51.116	84.832	68.352				49.775					50.463	66.143	100.922	17.636		17.766		11.503	-126.735	112.104
76.133	2.272	-51.516	65.999	85.01				20.686					41.577	55.212	20.258	19.136		53.643		65.981	125.776	162.564
76.267	25.304	-90.584	25.664	68.316				30.928					84.609	93.693	51.897	19.303		27.924		46.571	128.236	92.689
76.4	23.584	-109.421	26.454	90.142				64.965					92.124	113.11	-28.051	52.466		21.654		52.045	127.806	49.938
76.533	36.027	-153.283	120.151	68.095				71.113					90.637	58.985	104.327	9.115		57.766		133.999	-0.658	179.566
76.667	2.103	-109.499	117.738	51.439				40.523					64.22	105.207	62.787	-12.119		55.455		155.623	-126.537	82.519
76.8	-13.35	-192.959	69.005	-71.022				56.352					68.984	53.622	35.353	35.621		26.412		44.178	530.828	89.041
76.933	-18.189	-114.876	107.654	102.097				81.237					61.536	104.154	71.678	9.121		65.043		224.549	53.361	118.087
77.067	5.03	-162.043	169.877	117.657				93.003					-24.56	38.064	97.64	41.964		23.897		50.072	109.172	35.131
77.2	41.952	-116.817	63.225	80.417				66.156					70.038	106.049	89.399	95.527		37.779		58.32	261.959	85.551
77.333	37.762	-73.728	199.544	96.887				45.608					50.075	40.339	87.031	84.303		-9.478		49.525	121.084	45.812
77.467	20.768	-29.682	88.144	76.194				26.396					-6.561	43.645	45.873	18.385		72.448		10.724	71.601	118.28
77.6	133.676	-27.671	56.618	217.692				26.243					12.09	5.01	49.399	16.528		58.499		33.725	36.401	103.136
77.733	-16.445	-29.1	99.937	50.023				19.725					-7.995	44.925	40.694	11.047		71.014		42.661	183.911	59.978
77.867	-18.741	-52.402	-5.774	81.58				-3.727					12.96	-3.831	13.906	22.919		35.192		55.878	-210.891	32.49
78	-28.066	-24.958	26.441	79.627				10.149					38.305	52.296	78.942	-22.263		70.695		21.874	197.376	70.837
78.133	30.054	-34.102	25.924	72.153				24.234					-5.049	-3.91	56.479	3.014		106.954		16.377	181.345	31.925
78.267	14.671	-37.109	63.364	77.917				-6.609					-0.396	48.847	70.277	5.69		73.443		-10.584	85.11	100.146
78.4	101.958	-37.715	24.245	33.024				-8.65					-10.018	42.085	71.99	-1.361		74.503		-7.12	-114.372	95.521
78.533	96.94	-39.38	28.212	43.23				-11.831					35.446	37.491	-9.627	-19.444		37.402		61.506	171.774	113.911
78.667	99.14	-26.898	78.915	64.71				4.064					40.479	33.582	-7.846	31.108		-20.708		66.351	197.036	175.669
78.8	126.529	-40	97.352	98.856				-20.922					67.955	-10.032	-49.97	-8.266		157.303		98.959	192.604	65.698
78.933	102.135	-7.453	-29.346	75.756				-4.701					27.146	-21.12	-110.726	7.01		41.448		129.972	49.108	99.21
79.067	144.98	12.156	214.684	-2.532				6.027					-12.887	7.11	-168.776	-2.889		87.51		100.163	50.87	81.396
79.2	95.898	2.279	51.417	-4.574				6.182					49.675	-33.6	-248.26	-26.373		49.66		94.816	144.31	31.932
79.333	129.486	7.228	71.665	-5.362				8.091					22.74	0.334	-202.201	53.701		9.366		2.495	-202.141	76.17
79.467	68.86	-12.195	3.249	-130.824				52.57					87.633	-39.038	-141.12	-23.334		19.22		89.4	468.107	27.766
79.6	138.104	34.448	-106.991	-35.158				-17.658					45.715	-149.955	-26.059	-20.169		49.865		-6.048	-176.557	16.236
79.733	156.094	32.859	93.221	20.053				-15.241					37.671	-203.677	-163.748	9.034		14.561		37.482	302.427	61.561
79.867	150.91	55.231	75.648	10.522				-27.945					194.368	-232.308	-248.851	-16.687		36.239		-11.487	-11.595	30.005
80	89.465	50.39	225.928	26.51				66.63					32.943	-253.166	-225.358	17.178		-15.986		52.282	53.496	51.775
80.133	84.757	3.725	68.39	22.732				5.997					5.45	-288.978	-251.013	-36.774		207.413		55.653	284.568	22.555
80.267	111.335	20.988	201.147	5.318				-65.703					183.868	-265.855	-301.984	-5.9		89.929		-3.179	32.382	19.552
80.4	99.198	12.481	127.214	8.663				-23.977					-32.114	-324.088	-318.43	-9.995		62.333		-7.967	-34.563	8.387
80.533	61.182	10.297	193.611	18.405				-21.043					65.698	-308.644	-205.681	-33.476		64.322		61.279	114.311	-17.428
80.667	84.387	-19.991	97.002	3.51				-42.716					155.293	-320.627	-162.725	19.49		59.753		-18.538	-105.353	24.325
80.8	60.07	19.116	133.01	-37.312				-27.585					16.904	-208.673	-141.595	-7.502		66.701		51.216	95.842	23.769
80.933	23.876	8.026	98.58	-132.365				13.881					140.43	-143.376	-112.062	12.986		28.712		35.837	139.82	-6.751
81.067	18.14	-4.212	91.709	-202.52				56.629					75.34	-82.063	-78.461	-2.721		65.764		2.218	-96.647	13.372
81.2	64.505	-27.297	126.829	-206.138				77.635					-54.347	-127.234	-55.597	-1.083		48.013		-12.175	196.467	55.138
81.333	88.949	16.417	171.811	-237.29				61.892					107.17	-157.109	-30.269	-13.242		-3.401		-16.338	112.745	114.857
81.467	18.944	-21.375	160.018	-191.686				39.919					59.752	-55.727	-4.95	-5.179		179.671		138.565	44.355	88.173
81.6	-56.324	-5.327	226.926	-264.559				36.174					94.857	-236.183	62.925	-16.889		38.769		-74.84	97.896	43.779
81.733	50.809	14.332	180.861	-194.262				27.102					38.144	-92.736	69.025	7.048		49.145		46.528	-16.073	148.486
81.867	12.074	-59.5	133.525	-178.113				51.287					-70.546	121.896	101.763	10.274		29.374		15.644	92.241	67.041
82	158.985	-47.803	95.849	66.188				45.439					142.89	-33.695	135.853	-13.55		-10.437		-9.692	141.477	-11.667
82.133	48.701	-107.934	58.076	-41.252				22.944					-28.849	-74.338	48.085	7.386		-9.771		87.15	35.28	86.649
82.267	8.696	-74.432	45.275	49.878				51.311					93.34	129.12	80.424	6.967		-4.688		59.62	13.517	-16.392
82.4	9.068	-95.225	100.046	95.41				39.008					118.402	58.432	31.736	11.208		-28.948		-30.452	88.004	-27.442
82.533	-20.982	-69.013	67.078	15.028				45.284					124.313	55.016	17.995	-7.932		11.238		124.811	116.53	-24.793
82.667	58.184	-186.726	37.835	32.366				47.589					85.014	66.218	62.232	21.252		-130.816		22.003	42.361	-32.17
82.8	69.401	42.741	56.33	25.985				14.749					85.055	116.856	82.055	12.655		132.445		31.5	108.026	-29.642
82.933	47.894	-14.092	-48.621	90.719				6.85					92.787	88.206	20.09	-80.021		-4.95		-16.91	26.003	24.305
83.067	31.851	-47.707	-26.409	78.952				27.125					136.404	81.435	66.79	2.73		-30.3		92.537	14.403	-10.177
83.2	6.497	-18.878	-66.107	100.582				-3.112					130.681	90.396	94.352	17.69		29.609		6.587	75.465	40.393
83.333	61.453	-32.893	-27.403	60.705				1.176					132.791	73.767	58.686	-11.783		10.284		-27.228	86.015	100.567
83.467	0.941	-36.292	8.272	61.258				18.612					61.951	87.481	22.322	52.343		-6.525		26.197	30.596	161.982
83.6	9.292	-34.927	-24.191	52.681				-19.095				35.434	52.644	168.967	76.45	-43.648		-28.597		44.423	-3.439	45.886
83.733	25.293	-138.878	-50.381	108.448				25.949				146.173	30.471	148.477	-30.756	41.029		-29.493		12.302	38.319	12.92
83.867	32.616	-19.039	-101.515	75.726				-7.728				146.214	37.087	103.536	-279.4	7.814		-3.432		28.876	40.132	43.488
84	-8.706	9.445	-172.741	57.579				28.89				438.509	17.679	100.608	-281.256	-4.155		-131.762		-34.183	-78.044	69.608
84.133	16.06	0.933	-234.172	60.15				45.569				1.687	-4.754	83.419	-218.472	-28.622		131.057		73.992	121.089	34.674
84.267	52.223	-12.242	-246.792	73.596				64.691				3	2.757	61.266	-225.48	29.389		-19.655		59.584	-111.746	67.692
84.4	-10.608	-15.706	-291.151	109.787				38				5.908	6.697	105.145	-235.815	13.237		19.065		40.699	-205.04	66.573
84.533	70.54	-0.731	-254.211	178.553				47.601				146.693	7.572	121.008	-361.384	-15.024		55.618		1.42	-217.788	83.737
84.667	-87.245	-56.755	-191.229	101.756				7.019				146.762	-17.155	104.098	-246.373	-4.095		12.193		-9.748	-175.575	99.583
84.8	83.821	-83.829	-162.497	86.275				-6.491				-13.554	3.759	105.355	-87.46	10.497		118.344		13.235	-251.567	51.91
84.933	149.595	66.704	-84.039	101.222				19.716				146.625	-3.359	22.811	-22.849	9.41		51.548		21.005	-105.598	138.434
85.067	-16.148	-200.267	-36.858	27.286				35.643				7.512	-2.445	82.319	-79.697	-26.99		49.69		31.347	-296.22	89.141
85.2	30.319	73.704	-32.059	-42.396				35.876				-20.821	5.545	37.744	65.588	-97.95		-10.63		-13.072	-166.577	71.375
85.333	-81.57	-116.672	101.379	34.813				91.312				147.727	-21.622	86.667	-85.19	-65.408		-132.055		132.42	40.95	82.549
85.467	65.2	53.379	107.25	-44.389				107.933				22.008	15.314	23.606	3.322	-112.002		170.517		-109.45	192.442	68.148
85.6	45.862	-86.33	226.3	34.678				57.536				-147.602	-6.579	59.79	149.844	-158.757		46.481		-5.625	-26.125	62.599
85.733	70.974	-168.329	198.204	42.524				88.987				300.394	-49.167	2.245	171.794	-179.029		35.007		16.465	120.653	65.621
85.867	53.839	41.596	261.215	75.154				113.455				20.343	12.018	78.639	194.646	-24.164		16.534		-4.46	346.917	5.891
86	30.239	-45.905	134.315	74.021				52.141				-23.46	-33.197	98.625	231.487	-117.133		93.553		12.783	-26.946	15.245
86.133	59.33	-110.273	137.225	91.49				74.052				153.173	-14.939	-11.058	124.92	-40.431		22.692		22.462	161.097	-15.206
86.267	-5.007	12.432	88.849	36.114				223.309				17.707	-57.089	23.286	97.568	-257.981		-8.188		-17.433	-211.678	20.686
86.4	38.373	20.699	99.331	-25.205				85.807				31.754	91.242	60.008	62.111	-142.365		5.363		17.31	85.786	18.14
86.533	32.036	-31.921	88.39	-38.122				76.98				8.408	-18.062	54.935	-4.415	-67.41		122.694		5.32	17.056	16.609
86.667	-34.306	-15.651	85.057	-44.488				68.278				11.867	-9.77	94.331	33.214	-115.813		20.458		27.399	159.859	13.862
86.8	19.312	-29.262	100.009	65.203				79.075				22.709	-40.174	102.804	51.492	-116.6		196.743		-12.427	-64.398	-14.314
86.933	61.41	-77.782	81.868	17.018				67.014				19.843	-11.218	129.692	54.785	-51.802		65.501		-6.457	233.572	11.432
87.067	-39.973	20.398	-25.766	40.957				66.716				-17.406	-21.504	19.785	93.189	-66.11		110.185		17.289	-182.197	14.848
87.2	-32.677	36.558	-90.469	68.777				-46.414				-9.725	22.354	65.271	39.831	-84.839		54.179		21.389	113.684	-0.887
87.333	23.095	-55.748	68.245	42.372				83.545				-14.337	33.338	46.485	62.437	-76.668		37.204		30.806	199.412	4.503
87.467	-131.601	43.231	-43.751	39.397				56.338				6.49	-21.201	20.345	-11.733	-187.264		64.113		-4.445	54.247	47.814
87.6	-153.958	94.939	83.035	85.483				182.47				-145.99	-5.092	35.44	-14.787	-63.141		60.803		-10.159	-132.422	-17.28
87.733	-130.511	76.03	158.183	-55.535				51.942				4.127	-15.222	26.43	37.821	-124.336		95.508		90.471	81.477	19.271
87.867	-75.545	44.911	132.356	-40.971				71.933				6.186	-34.109	35.867	44.745	9.23		95.097		62.982	56.337	25.267
88	-57.569	-14.65	64.819	40.834				75.206				-145.168	-24.179	-7.856	70.226	-38.115		34.645		19.92	42.581	-100.754
88.133	-124.466	86.409	57.363	-30.91				56.809				-6.154	-17.616	174.775	115.604	-52.07		190.408		48.034	23.015	-133.401
88.267	-84.251	26.785	59.885	51.793				19.265				150.06	17.804	-9.147	114.147	-79.161		66.806		34.451	-105.571	-152.345
88.4	-139.93	-15.161	33.37	-8.384				-32.527				151.42	-43.588	72.921	128.004	-145.61		53.633		11.873	83.192	-218.907
88.533	-178.196	-26.448	64.154	43.126				59.981				7.926	-65.356	86.388	126.853	-43.412		89.173		23.221	43.918	-163.281
88.667	-164.347	-36.081	16.949	33.549				30.368				36.986	-128.773	49.093	75.502	38.033		93.45		9.688	-185.203	-156.187
88.8	-168.678	67.009	-24.569	16.172				68.276				149.44	-106.095	70.499	112.37	-23.604		77.272		48.488	105.475	-226.208
88.933	-188.927	73.323	21.505	49.275				45.057				18.012	-136.792	50.102	29.51	-0.455		112.54		19.693	15.29	-227.836
89.067	-104.763	14.48	6.926	34.269				158.343				149.792	-148.802	3.819	16.568	-14.895		76.828		10.961	72.772	-241.683
89.2	-148.832	164.478	56.754	73.896				56.421				30.53	55.167	53.225	36.517	-22.614		48.944		13.617	159.133	-205.072
89.333	-108.523	15.512	75.137	43.515				-53.184				-68.49	-65.263	30.845	100.115	11.67		-136.547		-2.989	-276.558	-165.991
89.467	-195.686	28.533	129.77	63.873				178.206				2.277	-26.426	81.202	121.591	14.842		255.628		-19.894	49.116	-219.462
89.6	-216.677	39.404	119.252	-4.601				90.182				-17.152	-24.452	112.113	176.263	-56.358		104.234		8.217	23.04	-184.747
89.733	-186.473	16.28	55.476	47.09				45.7				16.875	23.456	49.315	80.753	-23.115		53.429		15.098	292.852	-179.08
89.867	-164.379	-2.627	63.212	56.969				63.359				35.986	58.043	57.814	129.931	13.612		87.418		-23.914	167.112	-166.413
90	-93.059	49.672	65.853	53.241				76.287				25.496	26.696	43.194	75.964	131.313		74.944		15.827	-137.84	-170.008
90.133	-110.274	78.446	41.096	52.888				87.027				18.206	60.812	45.377	122.62	50.473		-25.593		-17.278	-57.408	-166.67
90.267	-151.769	129.398	57.991	29.166				21.669				-7.044	51.372	33.207	46.423	23.225		44.056		-20.346	149.671	-134.453
90.4	-70.804	113.143	130.029	50.547				84.966				-5.641	24.401	45.614	70.658	66.031		76.207		21.592	-51.986	-106.047
90.533	-74.305	33.616	136.192	55.988				34.381				24.461	29.969	-24.785	-109.245	96.471		36.82		26.633	-44.033	-131.349
90.667	-79.986	31.007	65.433	51.87				29.614				-24.506	43.686	51.47	-145.234	59.534		130.788		-14.631	-52.015	3.781
90.8	-140.624	-49.744	-25.744	68.558				24.881				16.067	120.221	16.454	97.299	50.172		-78.82		-34.725	-46.448	-29.066
90.933	180.153	-187.057	-150.795	176.157				27.614				56.137	48.34	100.845	75.114	45.234		54.329		36.642	177.783	42.255
91.067	9.376	28.169	-12.183	84.295				64.709				34.445	121.757	64.719	144.459	86.538		50.11		11.99	169.677	12.689
91.2	37.071	35.558	-28.432	38.664				67.362				-14.89	-100.587	118.347	69.306	84.035		35.215		-7.802	-238.711	35.036
91.333	-63.855	67.309	-23.826	55.391				64.099				-23.06	-15.984	135.528	103.016	85.628		58.205		-14.027	-7.007	66.652
91.467	13.421	104.292	-5.582	65.881				52.665				9.652	32.388	108.589	47.47	77.888		-27.279		43.937	-43.252	18.366
91.6	77.159	71.158	-53.943	84.657				53.535				66.778	55.342	124.362	-201.16	63.282		132.149		56.441	74.572	60.861
91.733	23.562	25.809	11.562	51.882				56.673				27.104	99.003	109.114	-265.868	20.643		78.267		20.773	38.936	67.472
91.867	57.955	56.838	42.732	61.532				46.741				32.446	37.034	42.766	-249.642	99.351		49.487		20.05	106.823	34.182
92	-150.822	39.51	-54.888	20.562				70.174				100.204	138.537	32.382	-244.837	13.529		129.464		16.074	-20.335	62.722
92.133	108.245	37.563	-181.828	18.476				58.99				6.14	119.27	20.14	-80.431	27.566		18.068		11.704	521.171	55.827
92.267	-151.381	44.787	-147.414	54.644				44.845				-10.996	161.736	81.613	26.177	44.114		53.848		-1.794	-78.334	47.442
92.4	-44.729	85.438	-209.836	52.936				63.137				77.342	56.296	82.46	72.353	9.865		82.374		-14.255	-7.561	129.845
92.533	-131.102	-54.478	-200.724	134.505				116.114				36.501	51.987	-188.019	57.186	80.426		70.876		-3.175	57.478	64.255
92.667	-100.17	35.658	-186.641	32.819				31.056				52.859	62.916	-238.244	79.26	157.461		13.554		14.786	60.612	18.865
92.8	-57.747	-33.55	-187.673	45.418				56.85				12.548	100.716	-97.746	85.945	95.468		26.982		7.025	-41.924	3.553
92.933	-62.807	-29.321	-204.004	54.663				94.916				8.75	71.188	-75.518	76.206	84.843		6.647		26.918	-337.317	-0.736
93.067	-77.915	-87.054	-235.66	73.475				69.307				4.894	85.45	-20.767	71.965	114.171		11.672		46.526	-191.022	-34.833
93.2	-52.244	-143.301	-187.425	27.411				33.751				-12.428	69.614	50.805	203.389	59.7		38.534		26.079	-401.917	37.483
93.333	-109.191	-137.071	-180.025	-24.486				46.07				15.708	44.634	71.482	73.868	148.686		44.981		17.092	-81.263	39.977
93.467	-276.146	-107.582	-269.108	-29.838				37.061				2.198	16.373	93.47	134.663	-165.52		-55.561		49.027	-55.149	76.568
93.6	-6.351	-179.498	-241.693	20.86				40.029				24.265	17.898	83.991	113.256	114.359		-77.937		-7.556	-94.713	112.537
93.733	-193.338	-32.171	-226.51	-12.513				4.839				15.684	-13.058	-27.03	133.572	21.95		-16.789		20.339	-129.617	116.241
93.867	-56.019	-228.04	-204.875	39.193				13.536				50.891	6.745	107.408	79.975	124.3		-14.206		12.814	-24.412	132.508
94	6.072	-126.292	-289.194	-13.208				32.333				136.663	-12.311	101.612	84.426	95.472		-18.596		7.986	-123.152	63.528
94.133	-26.338	-108.908	-275.392	42.742				8.327				-120.668	-11.922	22.166	64.771	107.333		-36.161		-18.614	-180.129	91.173
94.267	-44.195	-138.981	-348.283	-42.13				16.779				26.966	15.02	117.85	71.386	71.603		19.518		0.911	-177.664	93.303
94.4	46.052	-116.885	-356.41	15.944				13.908				-4.894	-29.555	-49.251	72.596	110.916		12.858		11.623	-193.782	49.295
94.533	35.352	-106.052	-217.928	44.901				-11.491				38.068	15.726	70.876	164.62	151.815		-8.56		2.363	-215.181	46.356
94.667	4.701	-47.698	-233.444	-26.34				77.834				45.253	15.921	71.285	158.4	77.829		13.153		18.882	-259.106	12.039
94.8	72.754	51.219	-228.348	-51.476				46.14				30.952	17.524	27.073	129.528	98.997		21.947		-20.793	-129.27	12.726
94.933	40.978	-52.115	-328.232	37.427				22.413				152.27	89.7	68.406	130.353	74.026		-12.565		-6.279	-246.818	60.463
95.067	39.062	-20.912	-401.186	23.073				87.738				-88.821	68.204	-33.095	109.87	72.266		-26.108		7.843	-119.25	95.975
95.2	53.41	-50.762	-286.462	29.185				58.566				142.007	23.745	28.903	59.494	26.32		-23.523		-23.018	-289.793	69.889
95.333	24.121	-25.943	-304.555	9.481				71.9				-77.052	47.585	-120.155	65.433	27.308		-10.666		-10.728	-320.061	91.519
95.467	146.516	39.89	-285.092	18.42				81.109				166.639	61.878	4.819	50.446	28.06		-2.48		18.013	-222.291	114.965
95.6	108.824	4.716	-250.804	-5.302				16.54				42.377	-18.683	23.427	30.351	13.135		-25.832		-11.353	-166.829	169.851
95.733	166.034	-31.412	-223.472	-37.227				15.666				52.03	45.668	7.899	38.586	13.434		-59.897		-34.39	-251.286	126.33
95.867	114.845	-33.402	-304.489	-28.574				34.127				56.511	70.539	27.55	39.612	8.808		-21.104		-28.407	-196.564	146.16
96	123.372	47.227	-224.814	53.252				81.767				45.539	75.369	14.482	-14.524	13.744		24.102		-14.49	-158.387	122.085
96.133	210.161	90.039	-112.132	69.791				-76.701				65.636	-3.884	120.07	39.172	-1.836		-36.35		-30.341	-256.808	73.335
96.267	177.747	-29.114	-204.456	-82.185				160.099				21.861	51.313	-65.076	-1.553	-10.01		-22.711		-12.48	-106.088	74.547
96.4	178.282	74.331	-142.252	-93.851				-73.087				83.378	-19.426	45.987	10.571	-25.639		-17.959		-46.021	-32.956	61.623
96.533	302.301	-49.265	-180.37	209.618				88.019				58.994	76.385	129.206	6.798	-23.686		4.327		-46.342	-36.966	30.276
96.667	143.971	-10.678	-178.361	97.17				80.994				47.971	185.361	92.967	-4.012	-37.835		-10.592		-51.916	93.978	18.113
96.8	130.736	-27.806	-178.573	21.381				45.975				-69.621	224.2	144.238	-1.688	-196.619		-9.08		-99.302	165.118	24.452
96.933	120.229	20.772	-224.718	-6.865				24.188				69.613	154.217	81.376	-2.221	-225.122		-67.338		-85.247	239.029	7.964
97.067	214.231	46.101	-206.566	7.408				110.642				62.2	111.348	98.626	-15.457	-131.997		-3.456		-99.006	355.236	119.549
97.2	264.203	-14.913	-240.256	61.276				33.158				44.341	113.773	65.998	19.36	-227.179		26.241		-72.95	277.694	53.567
97.333	181.484	2.825	-227.382	-50.852				-72.257				67.884	64.262	53.533	5.944	-114.109		-0.808		-94.897	180.473	84.338
97.467	209.924	-14.581	-162.864	31.73				57.419				49.874	76.599	70.18	1.943	-300.212		27.243		-62.486	117.941	34.262
97.6	282.531	-96.585	-244.749	-8.402				5.48				111.751	69.502	39.278	-75.046	-150.518		-37.317		-143.713	161.892	52.685
97.733	153.936	-76.986	-274.631	33.95				137.238				65.69	63.548	80.982	-82.101	-230.576		-39.751		-73.866	97.35	130.505
97.867	209.174	-105.188	-293.077	32.147				58.877				35.599	143.95	102.546	-196.399	-190.853		-43.365		79.374	147.801	40.367
98	136.011	-15.279	-281.548	23.718				39.389				69.444	5.877	96.165	-229.932	-178.405		-16.422		-56.599	148.653	31.564
98.133	233.514	-102.701	-294.077	39.106				20.517				43.474	18.496	122.478	-231.246	-150.338		-104.383		-50.721	89.006	5.257
98.267	263.552	-99.007	-286.563	11.841				-78.722				45.364	117.253	59.081	-168.306	-40.195		-117.305		-61.314	125.644	31.299
98.4	268.367	-76.975	-208.758	24.92				40.39				108.195	134.862	51.75	-141.005	-105.575		-15.407		-45.518	85.996	5.255
98.533	336.672	-67.141	-75.609	80.494				46.369				68.452	69.403	63.101	-63.417	-221.366		-52.167		-64.114	23.725	-10.025
98.667	293.358	-75.437	-104.12	78.525				29.083				25.144	86.639	37.723	-12.2	-72.6		-58.366		-41.398	70.447	22.605
98.8	285.765	-55.672	-137.557	72.308				118.439				42.787	71.399	46.377	49.414	-107.939		-70.172		-30.826	134.913	2.592
98.933	164.441	-25.772	78.186	55.353				9.102				26.899	71.784	42.019	63.317	-17.766		-26.707		-28.111	90.296	4.979
99.067	194.48	-18.594	121.509	64.855				72.683				65.896	58.207	38.887	56.116	-82.092		-76.105		41.569	111.625	-23.463
99.2	144.299	13.198	91.778	92.322				6.873				-3.902	31.617	8.329	15.383	-137.652		-72.077		42.751	112.825	-72.478
99.333	145.047	16.816	53.307	81.73				-32.59				76.622	98.202	43.536	223.377	-72.35		76.304		-2.26	63.849	-79.909
99.467	78.738	68.709	44.908	62.268				114.294				70.19	103.088	67.638	115.347	-15.916		131.81		-19.096	46.66	-144.096
99.6	145.11	54.209	94.353	58.332				-57.547				78.502	67.846	101.674	90.432	-10.02		9.993		-79.567	-66.813	-90.904
99.733	128.512	46.377	35.538	-46.535				13.515				114.28	31.152	101.782	100.4	16.45		-10.278		-91.562	142.864	-138.351
99.867	94.073	77.069	113.192	175.694				22.642				56.574	45.062	101.79	86.384	-22.999		10.424		-73.946	84.134	-151.552
100	97.736	-67.229	181.541	131.48				102.861				81.307	121.12	38.565	96.306	-76.625		-14.698		10.487	111.692	-160.362
100.133	111.901	91.158	61.731	32.814				32.869				42.939	98.267	21.221	50.413	78.714		45.502		-72.065	71.676	-191.546
100.267	148.275	55.327	27.63	91.072				39.054				64.528	88.632	22.348	68.585	-34.31		-24.376		-18.733	25.655	-235.355
100.4	102.138	95.102	61.428	33.437				8.688				65.38	56.359	33.058	39.523	37.209		33.57		-46.967	52.665	-241.471
100.533	128.272	-62.366	73.161	15.782				24.814				102.541	37.032	40.432	89.222	29.841		10.787		39.815	28.74	-210.189
100.667	142.34	66.895	102.901	22.13				74.024				127.776	140.587	78.618	61.627	27.14		19.803		-71.005	189.885	-237.582
100.8	114.578	8.327	93.213	5.668				36.737				77.867	117.435	82.923	-10.29	42.608		19.293		-17.007	4.818	-239.306
100.933	130.826	-3.444	108.736	30.27				78.341				101.157	62.845	129.514	-20.25	3.055		28.945		-26.126	-104.032	-201.431
101.067	87.868	27.381	119.006	9.382				71.612				67.065	-128.436	64.12	-13.17	-99.974		67.817		22.865	244.752	-124.492
101.2	114.454	18.093	167.689	20.917				104.625				70.431	-146.573	75.887	3.986	85.263		169.56		18.924	105.194	-113.097
101.333	138.619	22.694	108.877	13.946				76.864				25.634	-58.768	60.685	-43.49	-81.043		-22.484		15.24	47.452	-117.831
101.467	92.92	24.425	97.886	35.146				65.901				51.215	-55.77	33.192	-87.406	29.786		170.153		33.504	177.645	-138.723
101.6	164.52	23.758	195.706	-64.557				51.9				30.374	7.237	65.808	-166.228	39.731		21.731		12.306	-13.588	-149.893
101.733	184.504	1.135	210.999	-32.564				22.834				10.554	-3.279	105.265	-155.742	35.433		103.891		-6.601	110.236	-150.172
101.867	89.188	64.009	112.233	27.342				38.368				7.181	-121.364	76.863	-128.773	4.684		-76.171		-7.136	78.909	-45.763
102	174.716	28.498	152.527	96.28				20.936				23.579	-123.124	-13.765	-140.941	-86.07		27.83		32.343	136.22	2.279
102.133	185.284	31.004	106.158	29.036				73.606				11.691	-97.38	13.8	-42.007	127.752		-12.316		16.687	66.234	-67.787
102.267	121.274	79.437	27.215	6.945				81.234				56.274	-104.49	16.824	-25.218	14.55		-20.255		9.298	165.525	-17.775
102.4	136.634	49.95	69.441	-24.661				41.411				38.5	-250.047	31.316	-25.995	-11.048		-20.479		6.937	113.475	51.195
102.533	163.761	94.334	47.067	-43.527				96.326				46.269	-183.913	34.907	-4.743	153.849		46.661		-9.277	59.956	-15.051
102.667	105.551	82.382	67.51	-4.171				25.738				75.432	-151.14	162.135	79.289	-67.73		-14.008		16.085	122.002	-35.658
102.8	122.088	10.055	-50.543	47.423				49.785				-8.824	-69.505	-91.703	-17.209	121.921		-28.241		-17.64	86.221	-338.626
102.933	115.315	35.005	22.415	43.872				82.607				41.247	-19.154	25.211	-96.722	95.041		152.309		-6.626	71.928	-211.902
103.067	141.68	57.162	-8.338	20.361				41.805				-13.609	-34.541	4.574	-158.81	106.944		2.404		24.139	66.32	-204.129
103.2	87.982	46.52	117.722	23.251				56.372				-3.782	-160.307	-4.476	-194.024	76.662		-78.591		11.209	39.182	-76.321
103.333	139.102	118.305	98.003	15.426				71.926				-27.633	-29.941	17.367	-191.056	51.057		-21.59		16.267	90.384	-74.597
103.467	100.475	44.835	189.776	47.106				73.774				6.721	43.896	21.215	-198.053	60.221		9.311		6.997	45.817	-21.82
103.6	139.519	64.394	69.237	2.079				108.767				-70.001	117.341	8.81	-27.984	50.735		-40.615		12.347	-7.408	63.473
103.733	76.189	54.776	81.374	10.923				53.491				15.167	192.078	57.872	-68.37	136.789		-133.395		-5.978	13.902	103.967
103.867		13.8	67.244	72.648				64.188				24.867	288.22	78.354	-37.159	60.124		-154.631		20.359	5.765	74.155
104		16.761	126.311	97.383				57.19				-140.585	-27.131	107.476	99.453	101.963		-179.7		26.883	33.664	174.098
104.133		13.169	182.233	28.461				60.497				106.962	157.53	123.236	124.399	113.115		-158.066		-2.022	-46.521	59.026
104.267		-15.681	117.594	65.038				70.631				7.093	-7.597	97.96	184.569	101.541		-136.389		-39.351	53.816	77.465
104.4		9.131	116.328	70.335				48.41				-4.22	64.952	110.097	110.862	104.896		-114.493		7.268	-33.983	60.494
104.533				61.988				46.316				-40.575	246.938	34.165	93.941	60.676		-86.156	-1.916	-75.101	-9.387	184.629
104.667								48.798				-4.44	108.781	89.842	142.333	46.036		-95.739	-262.657	-138.082	12.079	52.958
104.8								49.946				7.916	139.894	50.266	76.945	152.928		53.933	-131.746	-127.025	-5.127	143.828
104.933						9.651		69.444				-61.729	200.695	80.682	22.889	168.262		-82.644	-395.727	-140.855	30.256	123.627
105.067						302.461		25.203				-24.025	133.426	68.912	35.423	87.712		-65.927	-3.175	-110.216	116.952	157.795
105.2						11.303		44.274				-73.8	85.773	15.078	191.679	170.559		18.07	131.541	-82.109	24.39	155.884
105.333				-301.984		-301.035		-27.969				-5.074	59.423	57.74	95.068	110.236		15.712	15.213	-65.408	-9.166	121.817
105.467				94.224		9.765		26.244				-262.648	57.024	34.833	60.23	131.405		-7.328	0.592	-76.101	-111.561	57.78
105.6				87.539		-150.592		31.586				-153.896	-37.304	108.519	79.414	70.372		42.525	-7.701	-57.267	-15.251	95.757
105.733			-113.427	-11.373		-6.262		26.17				-159.711	190.342	71.476	137.64	113.198		16.369	-9.124	-23.297	20.106	82.314
105.867			-26.924	16.384		-300.212		65.457				-114.333	42.226	77.341	135.301	92.908	7.16	40.134	-2.752	-21.488	-21.564	70.052
106			-43.915	77.586		-151.591		41.386				-66.069	119.934	30.559	53.972	49.739	133.184	91.427	-11.019	-28.567	77.29	32.933
106.133			11.821	52.594		-301.534		98.006				-42.334	30.669	-48.702	64.286	47.466	132.444	126.441	-8.645	-49.133	46.893	43.717
106.267	149.719		43.891	-20.037		-11.322		93.173				9.743	131.769	58.392	169.965	94.741	3.773	0.917	3.65	-89.116	74.428	113.847
106.4	-66.795		-17.559	94.767		3.567		82.324				-27.533	137.58	14.404	51.86	93.883	-4.601	37.223	131.971	-90.778	20.314	63.913
106.533	-205.626		-27.666	92.633		-151.891		76.621				-4.984	23.145	8.627	96.83	65.331	-9.928	-101.001	-5.162	-211.143	82.304	55.376
106.667	-62.491	110.704	52.705	21.295		-153.207		54.928				139.046	80.282	17.348	150.999	82.954	131.926	39.563	132.776	-106.976	57.375	82.274
106.8	-77.293	-37.303	47.065	10.079		-9.444		43.445				-68.526	65.652	-66.128	61.53	-3.955	-3.085	35.655	131.174	-101.071	32.552	59.701
106.933	-180.721	22.345	-29.876	92.16		-300.446		52.511				67.884	-114.053	-185.266	-32.837	22.079	132.013	93.432	131.24	-88.772	-11.793	22.415
107.067	-80.72	-8.309	12.94	16.485		-14.626		24.316				59.519	189.135	-181.494	-37.51	-40.09	133.98	133.912	10.126	-57.201	178.957	3.215
107.2	-19.856	18.15	96.494	34.05		-151.221		32.845				43.633	9.816	-199.244	-43.233	18.342	-41.227	135.832	2.126	-41.845	62.946	1.324
107.333	8.419	-20.5	94.416	59.9		0.765		62.37				51.107	32.601	-202.599	11.986	72.137	134.993	113.085	206.457	-107.389	52.548	24.346
107.467	-29.678	-11.457	49.446	36.142		-150.54		92.596				23.668	62.223	-226.984	15.615	-1.682	66.083	144.037	-42.977	-9.691	62.312	56.315
107.6	31.735	13.779	33.43	20.949		-150.649		73.702				6.532	-10.598	-256.947	8.722	39.038	96.151	141.437	35.733	-30.341	32.828	127.324
107.733	7.422	49.129	40.029	-5.162		-150.866		89.181				3.072	129.949	-271.022	-10.837	21.345	4.68	130.745	84.615	6.146	55.55	103.656
107.867	66.379	-13.783	52.282	30.28		-153.072		44.108				5.662	36.58	-231.669	-0.9	-6.999	31.67	108.583	-87.115	-20.06	18.442	113.618
108	134.738	-21.791	117.28	31.776		-150.912		46.707				139.881	19.146	-205.215	6.502	-25.409	29.012	114.809	28.507	130.781	28.914	123.432
108.133	55.854	-12.723	189.564	8.204		1.718		46.877				-88.96	11.164	-205.14	8.067	42.469	23.009	92.191	26.559	-50.245	66.236	86.275
108.267	69.787	25.089	100.544	-2.564		2.916		74.773				55.647	28.721	-106.906	115.859	-47.44	-7.382	94.798	41.921	-9.978	52.208	137.925
108.4	63.73	70.65	106.288	-22.908		0.675		76.119				12.062	39.578	-97.649	123.594	9.973	11.44	72.474	102.856	49.112	51.836	90.996
108.533	33.422	26.419	66.893	-15.589		-150.456		40.273				94.27	-0.447	-127.889	124.079	27.947	-22.851	-7.914	-66.601	-116.264	61.399	138.442
108.667	56.361	16.901	33.366	-3.685		-150.684		18.278				42.277	22.899	-147.975	148.546	-38.47	-6.212	29.966	93.242	-16.811	43.067	63.785
108.8	85.881	19.013	89.087	40.9		-151.24		16.206				34.072	45.284	-29.083	75.847	-83.399	43.464	73.982	-84.914	6.69	55.714	40.067
108.933	65.913	-17.341	88.979	-10.183		11.256		26.047				8.75	13.892	-265.106	117.481	-85.74	-38.061	66.123	7.069	-16.571	76.431	55.276
109.067	28.967	8.216	91.378	-137.675		24.256		13.477				88.144	21.881	-4.447	127.298	-163.381	-12.925	113.305	4.747	30.667	80.997	16.082
109.2	30.54	-2.335	146.477	-251.62		18.972		22.906				69.386	60.512	-142.113	141.511	-213.747	13.188	52.279	6.818	27.261	63.018	41.325
109.333	50.426	26.111	108.949	-174.969		-151.099		42.47				12.831	8.707	-147.093	23.457	-183.629	17.036	32.762	140.264	127.244	96.668	90.781
109.467	32.271	2.415	224.459	-194.436		-300.966		39.449				17.277	33.481	-53.762	189.5	-138.601	-3.481	45.782	-141.888	-102.468	58.34	65.728
109.6	31.601	-17.929	156.622	-116.576		-151.429		58.517				48.909	112.84	-6.452	106.506	-187.568	-49.759	29.805	48.278	8.861	88.329	107.687
109.733	18.904	-6.948	202.699	-104.203		150.698		53.852				140.231	33.855	12.787	114.716	-23.274	6.509	5.973	-68.277	-81.789	57.471	45.384
109.867	16.153	14.969	62.134	-27.784		-17.889		-8.828				221.821	114.627	-11.148	164.71	-69.017	13.989	49.073	77.424	-24.793	52.067	43.471
110	71.592	-14.508	67.742	-52.031		150.973		18.746				-79.762	71.013	-11.677	-48.92	21.272	-19.277	57.828	12.843	80.302	85.807	-5.017
110.133	50.729	2.872	114.047	-52.313		-7.021		49.42				127.276	34.024	-34.995	65.355	11.806	31.035	47.388	-5.914	164.54	91.804	41.901
110.267	50.967	8.236	165.186	-64.59		-151.938		79.436				-116.806	51.462	-3.942	71.99	6.063	4.83	14.778	-20.353	56.128	28.814	50.592
110.4	55.831	22.554	169.786	-80.219		150.575		80.086				22.586	68.47	35.18	104.434	29.954	-21.39	63.819	-2.076	25.033	73.072	40.103
110.533	27.176	-23.194	57.014	-123.881		5.993		40.142				23.709	67.679	83.748	82.19	67.3	-14.474	130.933	-26.58	2.657	64.932	147.622
110.667	21.084	-88.326	-36.522	-64.696		150.379		39.714				7.784	58.16	-29.921	58.363	56.464	37.764	-85.857	131.782	133.92	44.075	109.664
110.8	51.018	-113.338	3.744	-84.322		-150.671		-19.428				16.022	6.498	67.706	68.854	96.322	6.803	14.318	-112.27	-105.832	24.019	93.557
110.933	-25.477	-176.501	118.265	-103.98		-9.868		47.097				25.196	-5.265	153.976	69.918	33.441	129.496	-14.223	-68.522	-8.778	57.802	50.642
111.067	-33.69	-118.678	147.568	-74.151		16.964		10.116				37.477	39.072	37.231	113.371	6.975	111.909	45.332	77.267	-4.376	90.781	53.424
111.2	22.673	-146.62	79.82	-118.308		-3.304		3.414				29.01	155.493	-7.107	-33.538	9.786	52.435	5.988	-95.037	20.604	49.577	15.883
111.333	31.923	-88.608	132.631	-82.466		3.962		26.56				22.217	51.444	-129.647	64.405	47.194	-14.845	-23.782	74.769	-20.88	70.02	74.136
111.467	2.382	-102.161	102.25	1.631		150.964		11.343				4.811	64.73	77.375	106.729	79.738	43.99	25.933	-13.132	7.007	28.972	28.156
111.6	22.777	-85.973	123.484	29.904		-152.358		-20.307				53.394	-15.333	97.192	71.742	-36.839	-16.575	46.662	-5.852	-14.287	95.691	32.088
111.733	6.384	-68.017	102.892	48.462		150.418		-10.133				29.304	51.173	22.901	20.762	11.25	83.982	-4.585	74.768	-14.994	15.657	13.809
111.867	73.689	-54.45	255.043	70.592		-3.478		-10.653				102.823	22.479	20.572	53.637	-17.196	51.925	-28.548	15.173	-27.649	56.788	28.145
112	87.606	-24.327	213.139	31.692		-1.711		71.838				79.637	-54.551	17.69	72.298	51.141	41.279	46.232	130.601	133.116	54.642	45.409
112.133	-7.695	-58.076	118.167	13.625		-3.955		72.344				70.73	26.888	3.392	89.356	48.017	58.347	-6.352	-43.147	-108.195	51.576	6.276
112.267	-101.213	-35.773	114.6	28.726		149.827		118.354				69.994	23.473	-0.252	134.337	-28.582	21.992	91.369	27.566	-5.153	54.505	30.717
112.4	-302.293	-38.337	86.77	4.421		-3.798		102.595				43.387	15.977	38.428	129.492	-5.145	117.94	42.694	-6.978	-22.26	67.47	-18.82
112.533	-310.02	-34.223	74.035	24.178		-2.24		45.192				56.681	16.716	9.139	176.415	-25.995	102.952	25.334	-90.739	-11.829	-2.083	-46.226
112.667	-246.86	-59.8	38.412	11.683		449.968		93.529				99.691	-9.274	41.59	46.003	32.282	93.184	-15.117	-10.444	-61.442	67.824	-37.741
112.8	-244.308	-33.865	-30.379	91.119		-149.713		72.484				40.099	81.073	43.058	87.906	17.914	94.683	16.214	112.121	-41.587	47.473	167.48
112.933	-210.307	82.276	24.884	68.279		-151.447		42.614				18.621	-6.17	-5.875	106.837	41.704	80.192	-16.987	-4.293	-102.192	66.278	-17.24
113.067	-171.909	80.093	43.407	-9.441		151.526		16.497				58.328	22.08	33.176	100.376	30.926	76.549	19.347	3.735	-123.049	40.765	-120.554
113.2	-47.979	66.566	76.824	56.842		151.411		54.087				60.584	59.389	71.874	98.617	13.502	71.618	-40.717	3.698	-93.329	3.665	-70.783
113.333	-52.278	144.439	212.537	50.061		-150.785		93.018				25.568	-26.824	-15.707	70.763	40.147	17.949	102.056	135.578	-257.394	48.096	-128.015
113.467	-76.296	62.658	168.205	105.586		150.548		61.41				47.497	9.963	33.641	82.726	28.116	115.875	-112.895	-239.3	-364.998	49.353	-125.794
113.6	-39.779	58.884	110.581	171.827		-3.191		-34.397				60.27	21.973	-19.639	45.422	115.326	35.537	-55.73	-4.022	-80.463	64.547	-148.945
113.733	15.753	60.217	179.454	80.995		-6.274		25.403				80.247	19.336	-12.991	112.671	87.267	-9.363	-69.295	1.252	-15.014	44.199	-151.636
113.867	104.706	64.13	87.45	-6.746		6.642		5.34				4.29	9.674	3.862	-7.575	36.872	-19.615	-103.328	91.6	31.558	82.61	-136.281
114	97.446	56.02	55.47	48.996		150.197		21.627				91.707	8.241	-35.099	42.882	10.935	-59.257	-122.995	18.81	-17.826	62.303	-215.361
114.133	33.191	63.714	-2.734	131.32		-9.875		-8.964				64.337	-7.82	17.208	83.187	33.577	-60.264	-106.995	1.531	-17.164	32.359	-30.631
114.267	44.167	59.872	66.97	18.113		5.186		-8.102				72.096	43.888	-1.758	43.816	-41.81	-32.907	-114.538	-5.638	-33.458	29.522	-27.963
114.4	112.593	54.239	14.011	-11.865		150.48		6.03				57.994	4.157	12.966	64.255	132.384	-33.974	-170.27	-93.2	-19.117	-13.014	12.055
114.533	152.876	60.73	17.35	86.829		-3.488		-25.122				43.717	65.436	42.756	94.048	105.996	-21.103	-151.643	8.601	9.449	173.039	34.981
114.667	274.74	62.744	10.753	57.567		-8.38		11.497				63.443	-4.64	58.361	133.581	62.23	-132.699	-167.944	136.032	-10.61	-131.095	45.283
114.8	110.861	36.606	-46.809	-22.88		1.305		16.941				47.476	-15.822	87.204	71.718	-33.346	-103.036	-81.255	-164.312	32.507	-1.935	17.837
114.933	144.808	29.478	-152.022	15.614		-3.523		26.732				51.509	-195.116	85.675	128.451	42.264	-194.042	-106.521	8.768	1.356	9.207	-38.644
115.067	140.132	35.313	-225.755	5.08		12.522		14.602				14.397	-164.193	237.948	69.554	45.261	-200.966	-93.743	29.569	-19.206	61.031	-116.994
115.2	86.845	25.537	-302.175	67.143		150.402		11.035				3.825	-148.765	44.641	72.187	18.153	-161.217	-114.697	107.232	-16.844	96.866	-156.922
115.333	89.323	82.861	-282.833	105.708		4.077		-24.086				52.856	-147.732	105.883	52.503	19.064	-240.45	-172.203	-73.917	-16.207	50.516	-184.6
115.467	55.851	127.551	-234.442	106.436		-1.333		14.067				-1.014	-188.786	98.927	25.308	23.949	-272.735	-114.709	-14.207	-27.961	108.542	-153.433
115.6	48.053	146.316	-42.339	58.782		151.07		-0.829				79.938	-165.032	78.5	32.912	15.296	-263.823	-136.847	134.7	-66.008	62.235	-129.828
115.733	-23.561	108.474	-283.076	61.69		-4.61		-8.422				52.586	-150.229	-49.997	43.373	35.875	-133.171	-173.474	136.806	-55.099	82.229	-178.555
115.867	-38.983	104.709	-73.196	117.354		-150.223		2.825				69.765	-186.505	7.037	26.757	66.7	-262.896	-154.053	-136.38	-35.505	70.659	-113.121
116	-48.573	89.121	-218.676	10.77		3.236		-32.472				24.408	-216.506	76.198	3.228	53.454	-264.152	-128.464	135.392	6.523	99.964	-63.722
116.133	-196.932	57.814	-176.309	21.45		29.764		19.446				79.514	-204.26	129.672	16.873	45.09	-131.759	-80.952	20.713	-39.662	50.688	-39.039
116.267	-332.601	48.293	-161.101	40.355		151.045		-57.552				4.115	-208.872	81.379	19.477	28.564	6.646	-131.758	7.564	6.773	43.495	-19.09
116.4	-206.401	56.094	-204.49	58.54		-13.904		-69.153				52.04	-76.82	-56.372	7.774	26.492	0.277	-88.743	-1.015	8.257	110.289	52.122
116.533	-208.198	62.17	-252.003	43.38		301.343		-76.94				45.739	-114.492	51.683	38.153	15.514	132.24	-68.757	-1.316	37.508	34.028	-22.526
116.667	-210.55	35.167	-256.858	51.949		-151.355		-108.145				74.826	-78.801	164.378	73.469	56.012	263.285	-32.402	-3.009	3.984	132.763	-36.034
116.8	-232.162	31.766	-237.219	-12.385		150.36		-23.7				78.159	-117.566	53	45.357	26.267	-2.966	-51.557	135.85	3.707	82.86	95.123
116.933	-156.28	1.358	-311.816	-34.073		-9.411		-41.545				39.98	-65.812	65.014	63.477	61.558	-2.748	-20.792	-15.772	-27.014	85.229	-104.311
117.067	-93.802	45.092	-272.242	42.429		2.233		-73.326				64.619	-93.259	93.432	122.304	102.153	-1.662	42.486	135.585	14.28	70.459	-123.899
117.2	-100.942	104.766	-224.568	66.455		1.219		-118.198				-25.218	-131.538	50.427	132.805	78.731	0.971	55.931	-9.172	35.353	109.776	-168.852
117.333	-150.846	88.314	-367.26	-4.613		151.177		-139.666				34.6	-50.342	95.528	134.258	71.767	1.993	77.516	-4.664	129.902	63.518	-180.992
117.467	-17.004	79.923	-65.543	-3.074		-1.848		-64.482				43.995	-159.412	59.406	78.363	108.174	-4.984	89.019	2.905	-48.139	17.282	-255.003
117.6	-8.554	49.475	-97.23	-15.486		150.567		-46.54				32.973	-24.575	57.234	12.528	-36.585	0.944	88.087	-3.135	67.45	72.315	-168.53
117.733	-15.346	113.833	-108.088	41.149		150.367		-42.981				65.727	17.949	67.965	208.953	103.61	0.231	72.572	2.889	101.449	103.144	-229.762
117.867	-37.773	97.75	97.775	-135.618		0.558		-20.387				55.93	-34.017	-62.4	8.442	42.912	131.782	119.744	136.447	95.356	-2.835	-250.92
118	-34.115	84.427	38.312	174.421		150.317		-5.995				59.176	27.544	24.465	105.549	-3.025	-132.129	165.307	3.767	52.889	41.378	-105.229
118.133	-112.783	73.83	-177.046	49.354		11.334		-2.519				20.185	66.567	25.721	45.336	40.984	3.175	109.008	3.582	54.922	-17.099	-120.637
118.267	-21.788	36.041	34.104	-121.797		150.068		-30.109				10.876	23.949	111.434	74.589	12.193	7.325	89.255	-136.176	13.688	-1.464	-6.606
118.4	-50.814	51.186	-41.87	217.021		150.306		12.046				31.472	3.34	64.191	114.9	33.961	3.246	123.17	136.612	35.739	36.751	49.772
118.533	-51.745	41.174	74.055	88.227		-300.699		28.447				-9.14	113.107	-60.332	126.408	13.47	132.016	103.17	0.478	7.993	-21.476	232.523
118.667	-43.412	27.519	144.627	99.415		150.961		-4.153				11.161	137.756	48.981	126.66	-84.097	-132.2	100.759	-4.326	39.312	3.338	96.736
118.8	-12.24	-8.247	143.759	38.314		150.662		46.816				18.371	136.885	35.99	113.131	67.344	1.246	80.477	-2.698	93.817	4.029	97.98
118.933	-20.259	22.698	231.669	42.813		0.548		45.608				14.481	149.967	56.296	92.614	31.778	132.036	5.341	-0.701	133.836	14.361	71.207
119.067	-53.288	20.799	287.068	20.04		9.2		-3.896				21.758	98.882	64.401	131.751	-26.38	-5.238	75.959	-7.565	75.715	-1.288	80.867
119.2	-56.561	8.129	184.984	55.397		8.342		31.753				51.708	150.591	79.298	-12.218	10.869	8.71	14.426	-3.862	74.161	33.825	37.657
119.333	14.111	16.57	113.542	65.479		150.504		34.692				70.733	140.593	41.009	161.67	-81.723	-131.73	70.509	6.119	84.088	-1.764	-87.01
119.467	28.101	-5.088	210.946	39.798		-5.914		62.96				76.065	145.948	10.206	-32.734	-109.156	-6.403	23.721	1.369	68.162	6.73	126.304
119.6	84.168	21.062	113.851	78.542		150.304		18.304				30.435	161.491	47.597	203.229	-126.095	6.008	36.749	-5.644	27.362	-2.994	25.336
119.733	112.732	18.791	104.363	29.245		3.916		4.636				36.821	89.257	3.092	81.393	-77.71	6.863	37.541	135.808	8.715	37.651	17.478
119.867	73.129	62.305	126.768	25.09		6.864		16.188				31.924	75.258	-23.996	94.26	-102.581	131.707	74.615	-5.191	-96.008	20.992	33.421
120	56.592	13.24	137.071	11.826		-0.764		-9.67				-28.927	46.979	-8.509	116.102	-134.692	-0.362	24.474	9.094	129.432	85.097	63.681
120.133	88.099	17.721	98.399	39.534		150.325		3.474				41.61	566.593	478	588.643	271.529	-523.601	514.613	-151.171	470.12	-448.817	586.929
120.267	-259.346	282.56	293.565	-286.771		-299.7		235.233				-164.835	42.067	-238.477	-379.295	-220.257	-134.474	20.499	-139.973	18.35	14.937	304.85
120.4	66.447	-35.994	117.929	139.973		-150.347		327.425				135.71	11.07	-394.602	-306.374	-185.034	-266.38	35.798	35.119	-15.9	71.965	264.115
120.533	154.985	-191.087	145.601	122.245		-300.741		345.133				142.283	12.845	-277.275	-279.517	-212.413	-266.28	10.261	26.773	-16.363	127.484	139.217
120.667	7.758	-150.481	96.588	52.547		7.65		297.832				32.989	22.517	-308.629	-269.012	-81.658	-135.968	6.486	136.657	-16.529	76.744	84.404
120.8	-4.049	-20.936	70.719	23.446		7.487		125.626				48.061	-4.868	12.958	-278.833	10.581	-531.015	11.944	-136.421	34.305	57.297	106.782
120.933	21.598	4.546	62.125	34.713		4.822		71.109				23.916	15.001	-125.803	-231.211	-55.347		9.584	135.963	33.049	38.743	129.15
121.067	76.665	-23.027	103.682	38.896		13.964		97.482				32.35	-123.977	-232.304	-338.718	-240.594		24.597	5.757	58.67	36.897	124.035
121.2	253.317	-176.367	280.596	231.956		300.9		198.866				-155.369	-57.827	-207.31	-262.333	-180.842		-322.679		284.289	297.98	-224.634
121.333	135.29	5.677	167.801	66.257		9.298		75.387				-7.731	-10.023	-74.27	-150.215	-78.392		-106.844		130.534	30.768	82.373
121.467	225.64	-12.379	8.538	56.324		-8.243		67.348				1.167	-30.094	88.146	-215.341	-14.904		-119.79		-68.093	-9.612	67.84
121.6	128.728	9.003	105.001	67.002		2.575		58.819				15.996	22.687	-107.936	-250.714	55.903		-184.48		26.28	20.604	38.998
121.733	30.346	-6.529	101.58	62.008		3.649		81.779				36.828	-7.628	-12.996	-226.979	25.368		-211.466		155.464	-15.212	128.877
121.867	25.536	-12.228	13.714	69.19		10.002		79.026				63.027	-11.719	218.096	-223.752	77.879		-247.007		44.229	2.071	71.654
122	26.274	0.355	12.524	57.736		9.466		30.46				219.809	-18.235	77.197	-198.306	45.863		-245.102		48.163	29.991	100.214
122.133	27.109	9.229	57.938	67.251		11.833		49.24				198.191	-38.089	33.167	-212.043	28.027		-207.533		85.479	-0.957	-9.229
122.267	9.806	-16.822	106.464	101.279		150.446		34.464				208.313	-274.064	54.225	-202.765	84.212		-190.326		27.691	-13.203	98.231
122.4	30.03	7.19	87.643	47.711		-8.755		45.43				66.179	-197.161	94.952	-162.604	124.339		-199.187		56.288	-22.855	92.075
122.533	43.585	9.05	78.115	28.476		-2.896		24.306				81.183	-241.251	55.646	-231.352	160.456		-160.235		27.578	2.727	55.789
122.667	61.592	11.438	113.779	61.113		151.758		55.706				93.934	-259.916	33.171	-208.484	102.632		-145.397		34.895	25.502	161.838
122.8	89.659	4.107	147.013	39.256		-12.842		20.641				126.968	-262.909	12.781	-134.309	101.068		-202.584		30.927	-2.722	95.488
122.933	83.177	-2.987	100.468	10.909		150.512		-5.323				41.279	-45.068	25.316	-93.332	116.223		-152.118		30.56	-26.91	133.596
123.067	102.421	-2.548	75.279	36.716		13.882		5.101				-48.416	-66.3	5.539	-88.768	113.292		-112.733		35.17	12.094	168.753
123.2	41.068	11.821	115.941	75.774		-6.115		12.423				56.446	-52.847	-3.831	-119.834	136.181		-144.985		67.231	-3.448	-49.983
123.333	87.445	-5.888	209.595	83.031		-150.554	8.224	1.969				85.397	-13.275	14.534	-118.061	153.222		-122.85		88.528	-17.355	74.599
123.467	103.045	1.595	93.666	73.805		300.627	87.705	-0.545				88.214	36.06	3.385	17.751	88.758		-138.444		79.102	-46.483	80.707
123.6	47.496	-2.084	68.776	54.656		149.794	175.908	-11.39				87.337	21.032	31.307	-26.713	38.429		-149.104		51.232	-28.551	9.51
123.733	41.991	-7.519	18.569	33.918		150.002	87.773	13.591				156.59	-49.156	50.541	37.367	72.082		-90.311		58.226	23.867	51.581
123.867	43.182	14.751	31.762	-60.202		-4.271	98.503	1.777				-50.739	75.155	-24.194	46.849	8.104		29.854		58.777	-42.502	-35.508
124	51.519	22.922	-4.796	183.101		10.127	267.891	-143.726				141.687	-190.626	60.248	66.992	76.884		-115.069		10.325	15.589	6.409
124.133	26.883	-5.449	10.372	28.83		12.854	60.907	141.583				-72.296	-254.718	69.769	104.361	116.802		-100.62		7.175	-13.978	5.939
124.267	5.863	-10.433	-16.292	67.531		150.551	52.012	13.812				83.843	-184.48	90.647	131.739	160.158		-113.858		30.316	-12.344	-8.319
124.4	-15.993	-18.794	12.208	38.088		-148.499	-6.603	4.855				57.624	-167.374	128.408	89.257	61.434		-45.647		9.13	-27.378	131.165
124.533	18.462	9.434	-17.858	-128.225		12.227	40.1	23.638				15.311	-218.675	43.591	47.47	8.086		-77.715		46.891	-6.878	-140.819
124.667	48.626	-4.771	8.026	128.117		-150.25	-6.328	-10.381				17.415	-211.601	58.785	84.851	36.018		-60.627		19.506	4.752	5.015
124.8	28.627	3.841	-7.516	-116.981		-17.634	42.075	14.024		20.907		90.406	-14.039	-94.275	67.517	-32.206		-12.048		-35.438	-10.037	16.987
124.933	52.664	-3.922	1.424	98.829		150.149	-19.195	8.503		148.802		165.82	38.05	80.189	25.064	12.127		18.795		11.263	-1.548	10.93
125.067	48.551	14.499	9.978	16.705		3.58	8.676	20.58		156.93		-24.191	21.623	64.461	2.699	-24.955		40.186		32.589	18.572	-20.293
125.2	61.305	2.293	-1.681	171.686		150.583	-194.232	74.391		152.562		26.669	206.211	6.609	-58.735	-14.893		95.48		33.814	-34.209	1.413
125.333	58.396	-18.117	3.291	62.066		151.779	278.203	100.547		192.568		0.929	170.158	-28.025	-173.458	18.729		12.389		30.131	-14.333	46.691
125.467	137.394	15.242	-51.037	53.075		-147.819	15.138	120.144		120.542		20.25	125.739	-22.909	-84.442	67.357		94.412		105.842	12.254	-43.25
125.6	56.975	-8.186	-35.438	2.973		151.362	-188.687	58.063		126.429		-24.505	164.218	95.607	-128.743	4.578		76.492		102.861	-33.497	-156.053
125.733	49.017	4.109	-67.085	65.727		-151.815	271.588	137.708		106.206		51.981	85.827	-6.145	-134.814	-14.855		73.591		104.549	-9.491	-205.411
125.867	20.141	-6.395	-20.339	24.26		151.411	-207.277	67.269		59.505		135.152	98.932	61.983	-183.247	-268.387		92.134		60.578	-39.972	-162.715
126	14.302	-16.708	-8.935	-35.675		-150.192	255.034	41.449		86.175		-71.688	-98.207	44.886	-231.892	-292.314		101.367		32.53	-9.832	-118.586
126.133	13.135	5.123	-52.2	27.266		-152.22	-137.809	62.753		100.184		5.664	175.571	44.147	-92.419	-281.948		102.694		16.855	-0.224	-313.031
126.267	5.341	14.219	12.621	14.884		-150.968	-92.588	15.379		57.968		38.753	169.655	8.101	-147.627	-234.139		62.229		33.136	-11.189	-86.371
126.4	57.109	-6.642	-31.237	33.917		-154.096	27.037	14.665		48.023		26.086	161.082	8.449	-88.274	-178.922		29.709		56.302	-32.261	-156.491
126.533	15.712	12.037	-80.241	14.814		-29.973	257.518	27.521		10.835		32.694	107.397	-17.857	-106.31	-187.731		21.042		14.694	-41.658	-182.08
126.667	3.438	4.279	-37.588	-11.487		-150.13	-235.144	24.459		158.803		45.345	241.835	133.506	-115.386	-63.586		59.236		7.431	-23.272	-203.624
126.8	36.833	-6.334	-78.35	39.025		-151.973	259.863	3.795		-112.807		46.015	377.147	-133.854	-239.139	-22.405		37.419		-7.189	-21.754	-145.213
126.933	-10.914	7.787	-80.618	54.336	8.834	-154.052	-256.558	22.56		20.253		69.521	46.817	-9.758	-134.717	5.545		53.336		38.977	-41.354	-149.944
127.067	-15.354	-4.046	-46.481	-20.204	151.057	-144.62	-38.446	18.466		-8.8		47.637	7.322	4.531	-142.898	108.674		95.87		-9.115	-59.308	-189.521
127.2	-9.849	-127.167	-26.257	31	143.373	-158.021	104.764	-7.404		0.57		57.842	-41.239	10.106	-52.77	24.916		131.088		33.377	-17.484	-198.461
127.333	38.675	-190.778	-29.706	-4.666	115.234	-157.104	12.006	-2.454		7.418		-12.793	97.795	5.741	6.193	-197.417		91.499		-7.77	-18.356	-169.094
127.467	-17.988	-111.231	158.578	201.003	146.141	-167.163	211.226	-3.93		-21.157		62.956	100.46	4.785	76.032	-169.177		154.761		59.515	-10.138	-166.638
127.6	35.166	-109.723	-44.729	20.243	122.754	-251.645	-231.174	-3.115		30.294		102.781	83.312	9.307	56.583	-125.741		200.958		97.186	4.635	-227.563
127.733	192.083	-73.094	111.892	22.521	49.297	-196.122	89.081	-0.424		142.348		32.527	10.862	1.861	32.481	-127.173		159.891		72.495	-13.415	-62.938
127.867	85.441	-95.68	93.374	90.686	42.857	-130.887	178.047	0.104		44.983		91.203	13.858	2.329	24.265	7.544		176.86		78.128	20.117	-38.05
128	105.192	-70.409	113.19	70.47	3.783	-130.002	-253.873	12.84		153.463		20.754	128.121	134.506	116.774	109.827		127.158		3.929	-12.363	-21.597
128.133	25.177	-41.901	120.393	-50.03	12.479	-177.797	73.473	1.125		122.678		-24.649	58.019	-120.837	155.258	230.082		91.934		68.475	-19.798	56.194
128.267	49.475	-5.815	100.187	10.832	47.792	53.443	190.742	-25.696		79.311		18.792	210.469	-11.321	98.112	294.618		233.977		12.19	10.042	80.88
128.4	-2.445	8.535	235.336	114.943	-12.418	-135.84	-283.332	8.226		139.616		18.384	90.333	24.772	59.362	268.075		129.622		-22.361	10.884	67.197
128.533	10.347	-29.626	137.13	-30.221	34.283	111.301	-1.601	-3.561		48.321		23.713	81.028	9.042	125.669	242.325		157.2		10.128	-4.861	107.256
128.667	64.523	-20.442	135.567	13.469	129.13	23.22	-27.581	-13.67		3.629		1.995	-55.43	-20.53	176.822	210.6		150.146		16.168	20.789	78.719
128.8	52.855	-15.863	93.496	108.447	92.641	81.553	2.237	1.708		123.147		11.304	30.985	-21.105	67.305	155.788		85.268		-0.719	5.639	144.025
128.933	70.411	-72.458	75.934	23.222	92.902	-133.122	-14.21	2.854		18.539		22.117	-15.505	21.908	139.678	122.903		-15.956		-12.65	-14.306	73.624
129.067	59.183	-34.498	120.655	58.95	200.666	5.264	303.059	-19.431		-8.579		13.557	-97.416	101.655	74.043	202.809		-50.293		27.587	24.156	72.103
129.2	20.485	-34.696	83.161	4.027	88.111	8.49	107.758	-13.346		99.48		-12.122	-197.843	26.268	-10.706	198.518		-39.205		-34.51	-6.236	93.542
129.333	46.628	-54.833	85.138	55.63	31.158	299.497	84.111	-27.732		43.406		58.2	-101.531	-20.025	118.863	139.702		-27.862		43.3	-7.687	91.364
129.467	4.872	-62.44	47.832	37.01	236.261	-138.971	92.208	3.054		62.383		8.542	-51.503	-133.759	-110.656	141.489		4.829		40.164	5.426	57.745
129.6	3.979	-34.458	37.064	18.601	106.559	44.965	126.28	2.491		13.701		50.881	-236.188	32.258	-65.49	139.454		-8.751		0.736	12.144	39.11
129.733	8.727	-65.684	19.259	8.82	70.076	35.338	45.563	-20.61		5.317		81.829	-176.74	10.425	-120.279	89.145		14.167		-98.373	14.884	70.785
129.867	11.243	-34.913	69.153	6.72	178.885	3.41	95.756	-25.421		24.798		100.079	-13.252	-10.591	-185.914	114.917		46.306		-103.645	9.295	56.689
130	6.023	-59.698	85.019	4.534	120.301	-45.815	95.678	12.117		8.271		69.72	-36.959	8.691	-263.532	104.486		60.24		-90.627	-4.978	131.611
130.133	-6.375	-46.39	88.952	-9.45	-391.573	102.36	-51.117	-6.9		19.314		29.996	39.88	-12.929	-283.726	136.981		100.054		-69.146	14.092	100.381
130.267	-5.717	-71.453	81.653	6.892	-421.489	187.596	55.111	-30.064		-8.251		61.484	22.781	122.311	-291.725	96.142		52.913		-62.228	-12.705	108.542
130.4	23.724	-79.767	48.777	-5.467	-96.14	111.997	106.772	11.649		-8.589		16.358	26.249	13.158	-411.835	123.918		22.52		-27.251	-4.199	160.192
130.533	-10.992	-117.816	69.639	5.878	-34.599	94.944	30.835	-18.543		-0.943		27.424	-50.551	-25.435	-288.41	-46.98		24.97		-72.237	-4.817	132.83
130.667	-10.205	-88.125	6.947	-14.126	18.756	270.44	53.545	-12.13		-15.831		12.712	-60.423	-96.649	-189.403	-25.135		84.475		-20.062	15.137	161.489
130.8	-4.354	-91.275	88.039	-55.941	98.539	81.905	10.627	2.193		-26.497		18.34	15.825	5.225	-52.725	58.041		156.823		-81.485	-9.858	177.699
130.933	11.644	-76.868	61.408	69.512	85.758	82.429	3.404	-11.496		-4.549		-5.721	-14.128	20.064	-76.002	41.264		78.563		-14.945	59.057	155.795
131.067	15.836	-79.874	83.448	-25.983	192.701	120.489	43.788	1.161		0.328		22.925	-115.258	46.58	-19.423	57.889		64.045		-10.634	13.196	142.317
131.2	-29.269	-89.86	40.852	-19.051	188.786	163.74	6.911	-30.882		13.891		-3.975	25.087	14.608	30.375	87.17		98.927		-6.97	34.029	148.86
131.333	45.107	-84.97	49.289	16.017	151.124	113.863	2.084	-47.839		-3.14		16.87	14.048	-13.56	17.51	-17.467		52.918		-61.732	36.256	135.634
131.467	-15.402	-61.853	93.385	-101.202	135.365	51.651	4.324	-14.756		-13.257		3.977	197.747	58.354	31.221	65.406		81.552		24.056	8.145	104.23
131.6	-19.549	-95.792	100.806	-117.626	124.71	115.738	-32.911	-24.796		-1.271		14.455	-28.349	-27.442	15.721	143.017		65.365		0.721	107.13	126.119
131.733	46.283	-96.473	148.986	-59.545	131.251	115.818	25.027	-1.851		16.324		-19.22	25.329	11.761	43.555	55.611		69.435		-21.58	-83.57	145.927
131.867	-48.439	-32.632	79.122	-48.494	158.136	114.237	3.619	-41.258		-2.931		15.005	130.094	119.811	75.853	78.759		57.119		15.068	-16.406	151.686
132	27.35	-7.364	75.316	18.086	146.892	163.19	9.823	-27.098		25.955		15.294	16.467	-7.399	42.472	197.366		-15.256		136.627	-66.001	160.086
132.133	-6.446	-43.508	116.63	-143.553	95.253	46.557	-7.151	-29.79		33.843		29.794	-5.699	60.599	76.396	84.839		69.746		-95.096	-38.689	166.966
132.267	11.211	-2.622	70.515	152.928	93.826	101.313	-5.321	5.224		-12.837		61.138	226.869	-41.692	135.078	69.017		22.415		48.309	146.823	100.746
132.4	14.349	-17.298	76.455	-28.729	80.084	126.962	-8.213	-20.023		-10.467		-9.578	49.154	74.263	151.533	290.364		11.442		60.726	-4.295	96.733
132.533	-16.49	-16.469	3.598	-39.525	70.703	84.824	-120.188	52.613		0.826		34.609	291.339	17.529	258.547	-42.065		-26.631		-12.152	18.919	160.741
132.667	-14.29	21.598	31.314	-26.824	47.425	87.9	-156.07	57.871		-54.32		10.025	22.301	50.849	121.928	102.425		-69.636		96.486	45.664	73.235
132.8	9.84	23.539	21.553	-36.165	64.749	127.772	-183.693	54.9		-73.697		-5.076	36.012	76.963	145.343	165.326		-112.324		102.951	-5.44	121.17
132.933	-0.96	12.689	44.099	9.799	73.064	118.016	12.905	51.146		-132.146		23.237	64.201	83.12	134.282	107.558		-141.845		25.514	4.118	85.778
133.067	11.302	16.742	22.807	74.56	-5.388	102.109	-99.435	30.381		-242.438		6.076	15.874	19.684	123.948	77.18		-173.074		20.788	2.79	59.094
133.2	6.252	-3.895	58.21	-12.532	81.24	116.359	-168.464	17.485		-286.507		35.724	4.251	50.265	94.378	206.025		-190.772		-2.439	-31.158	42.94
133.333	9.598	28.56	72.188	49.175	148.381	75.585	-109.561	-18.806		-310.582		17.156	46.093	62.263	81.554	-1.165		-129.54		19.344	-17.407	14.521
133.467	-34.534	22.85	155.045	49.201	-45.905	115.123	-136.469	-41.25		-182.347		55.718	-210.495	83.443	152.557	95.803		-54.119		6.107	15.344	27.135
133.6	24.48	5.363	62.61	111.401	16.71	72.211	-491.766	15.797		-284.476		17.862	-305.267	37.331	151.728	99.016		-26.536		23.184	43.858	15.78
133.733	15.75	-11.709	66.132	55.805	92.752	96.926	-88.403	39.844		-147.599		46.685	3.118	33.37	90.927	138.108		-37.769		-13.7	13.82	-12.105
133.867	-18.09	-14.569	73.43	37.817	117.055	133.791	25.565	-7.788		-148.689		63.748	10.673	42.855	179.765	41.083		69.172		13.548	-1.935	5.292
134	-12.055	-3.497	21.356	74.138	154.762	122.903	-13.934	26.734		-158.616		63.843	-228.071	39.482	32.493	160.199		85.164		4.597	4.497	-3.513
134.133	6.155	8.224	59.507	41.429	58.753	86.714	-63.719	-6.928		-181.694		82.39	156.441	13.919	95.963	163.058		35.976		-6.625	-16.832	32.664
134.267	-26.511	31.873	102.45	10.467	-249.919	162.909	-47.884	15.708		-232.873		69.655	138.359	42.982	70.986	134.901		122.216		0.751	11.083	28.299
134.4	10.332	-17.753	75.839	38.282	-449.11	123.12	-7.285	39.635		-180.002		20.304	165.81	168.7	65.843	164.389		89.664		-15.526	-8.194	-11.416
134.533	20.264	5.824	183.599	79.59	-157.978	142.708	128.27	16.726		-155.356		49.745	274.141	70.602	99.622	112.155		120.752		1.136	14.976	-13.596
134.667	-59.253	1.171	89.245	158.063	-23.834	73.538	410.13	62.03		-155.35		84.067	40.367	137.624	20.108	65.672		28.203		16.897	-14.2	-266.624
134.8	-40.975	24.457	66.869	109.816	-17.301	71.179	174.39	32.668		-159.114		66.005	173.035	6.336	18.598	60.962		67.855		-3.771	12.806	-270.339
134.933	-133.493	-16.608	-26.611	86.597	55.139	49.365	-21.506	43.66		-255.3		65.905	31.83	51.997	65.904	33.45		115.618		-57.469	28.346	-218.33
135.067	-138.27	17.637	-19.795	50.525	144.71	-88.143	110.24	80.435		-239.572		29.326	219.707	25.47	17.015	42.173		78.049		17.133	-15.745	-261.325
135.2	-126.664	37.596	-11.619	69.254	81.432	113.659	96.806	118.018		-243.707		63.489	-28.483	-87.51	45.023	61.856		125.584		16.903	-11.233	-213.57
135.333	-73.378	54.824	36.396	31.778	156.229	24.574	-6.265	69.823		-228.948		21.215	184.294	-104.328	115.669	32.657		132.884		-106.94	-32.348	-146.052
135.467	-80.533	47.084	-17.585	63.137	216.992	64.389	-13.045	52.38		-234.311		77.38	23.338	13.755	105.57	76.753		52.048		-195.083	-82.217	-98.983
135.6	-43.228	49.457	7.207	25.785	133.038	6.178	15.512	48.192		-169.838		48.067	113.084	-88.339	73.177	2.966		98.01		-203.086	-81.688	-45.566
135.733	-87.3	32.36	-80.229	61.399	176.15	11.021	128.777	29.403		-156.759		5.254	0.832	-14.61	86.444	20.298		58.379		-147.54	-38.013	-5.651
135.867	-100.171	64.314	-129.088	42.958	138.522	14.23	-81.802	33.903		-105.38		16.384	27.256	-38.82	38.405	-50.702		39.686		-126.438	-50.17	-31.021
136	-96.102	142.338	-230.278	31.961	145.675	-4.175	152.667	93.423		-155.019		46.727	96.709	-107.947	7.824	84.106		103.241		-144.234	58.939	-39.906
136.133	-94.973	-120.431	-227.523	41.244	125.189	3.274	55.936	83.827		-28.423		12.421	84.082	25.597	-28.117	1.916		108.074		-71.842	-64.914	-48.512
136.267	-76.792	23.634	-212.81	-15.105	77.101	9.466	53.91	44.803		-60.427		29.573	73.075	2.282	5.307	20.83		114.046		-97.171	-191.979	-139.121
136.4	-51.63	14.864	-258.367	25.836	51.612	12.513	42.636	22.319		-119.203		3.866	105.667	-21.209	30.525	-34.544		160.347		-89.194	-17.695	-213.089
136.533	-60.808	19.87	-224.724	0.766	95.785	6.986	-42.851	36.731		-215.224		13.427	-99.57	-20.715	-39.2	2.897		49.995		-99.622	-119.047	-254.376
136.667	-59.811	31.599	-220.474	-19.318	55.811	22.424	103.894	65.779		-222.791		2.945	37.69	-41.107	60.699	3.127		68.269		-37.317	33.625	-212.296
136.8	-78.224	6.462	-220.568	-20.012	102.095	-28.752	1.3	15.848		-241.074		-7.885	29.666	38.467	14.995	18.204		33.707		-55.494	-151.025	-207.181
136.933	-115.561	35.762	-309.502	-148.673	-182.878	-37.094	-82.558	84.131		-254.927		-9.95	34.109	-293.646	43.061	-17.758		83.828		-97.764	129.059	-165.262
137.067	-6.12	-10.835	-294.425	-110.972	-367.16	38.533	50.91	65.886		-189.137		19.754	23.381	-175.788	199.654	-12.639		72.462		-120.192	-11.547	-38.097
137.2	-38.92	26.468	-244.797	-141.39	-161.317	-11.043	-113.698	52.592		-156.394		26.349	-6.235	-170.689	139.99	-21.223		80.135		-113.699	-164.082	27.597
137.333	-14.163	6.277	-347.157	-131.443	-139.948	9.138	-253.606	57.473		-158.776		89.49	27.251	-132.013	127.542	108.775		54.022		-104.767	-5.433	110.673
137.467	-39.91	-18.702	-291.992	-98.31	-140.269	-23.348	-177.091	59.847		15.897		20.548	28.725	-41.273	76.386	-60.507		34.289		-120.719	41.206	100.33
137.6	-61.591	5.31	-320.529	-95.519	-82.812	-47.404	-481.591	23.541		-17.496		18.575	38.273	105.495	30.542	3.481		37.403		-168.278	-105.455	-100.465
137.733	-71.97	-15.299	-255.129	-128.528	-57.128	-17.363	-216.98	-4.004		15.146		33.883	-21.513	-37.738	58.784	-13.392		38.879		-158.568	-80.745	-473.852
137.867	-34.132	7.493	-281.201	-151.793	35.819	-48.957	-129.694	22.503		140.128		41.455	78.211	25.47	74.625	76.818		117.243		-151.77	-54.547	-424.074
138	-4.437	10.148	-249.81	-204.43	8.817	-244.197	-96.683	-9.431		160.21		87.843	88.88	-77.622	158.614	104.495		24.253		-180.953	-51.048	-344.28
138.133	-24.274	-87.257	-184.068	-139.216	28.105	-126.19	-42.702	-27.887		109.613		90.277	123.07	82.874	112.245	131.738		37.036		-153.136	-32.947	-225.983
138.267	-8.707	-175.363	-136.546	-151.335	20.894	-47.437	-54.6	7.524		265.662		92.463	253.314	52.441	79.866	115.039		69.842		-121.738	-39.886	-244.719
138.4	11.364	-196.279	-32.937	-135.61	22.576	15.913	-41.969	-11.054		188.905		41.52	144.937	105.958	110.503	107.346		39.443		-133.37	-98.915	-232.41
138.533	28.775	-142.087	-79.278	-114.079	48.405	-11.909	-30.022	37.291		128.265		71.547	31.606	102.182	117.667	92.052		81.833		-72.003	81.085	-138.661
138.667	53.349	-284.608	183.883	-123.658	141.312	-145.309	-32.644	42.158		155.668		64.175	70.102	83.295	135.723	76.926		51.501		-73.794	-22.348	53.212
138.8	80.21	-142.064	70.282	-183.224	-143.608	121.55	-2.495	38.465		215.696		35.956	66.227	64.681	122.072	91.15		34.795		-42.306	13.786	187.856
138.933	102.649	-141.93	64.128	-212.427	282.774	73.922	-54.888	82.259		173		-5.254	-40.144	225.81	106.922	91.037		23.388		-87.839	-13.38	273.82
139.067	99.863	-141.697	45.531	-165.259	-142.678	60.495	86.922	59.853		201.175		14.848	55.49	-23.498	114.029	15.383		79.308		-93.154	-115.626	212.711
139.2	88.383	18.389	49.785	-179.728	-142.61	24.64	63.504	62.353		241.582		6.922	-67.863	207.049	87.308	97.186		40.918		-78.677	-0.949	133.702
139.333	105.425	-143.905	-10.299	-181.314	4.769	25.246	-72.891	52.012		190.216		10.11	-15.971	27.923	128.344	153.943		29.239		28.177	146.179	140.875
139.467	56.87	-8.732	122.447	-210.146	141.577	78.081	59.148	110.291		99.475		-1.901	46.621	89.286	84.267	-4.561		35.685		31.174	11.618	90.752
139.6	44.311	0.522	126.254	-243.013	-1.673	106.207	51.558	71.848		201.764		15.567	-13.947	72.739	110.623	96.362		46.466		24.878	-23.347	117.742
139.733	64.787	-14.057	84.45	-220.738	7.02	101.096	13.426	127.757		131.639		-10.474	63.498	42.227	127.995	103.74		50.639		3.707	7.339	131.055
139.867	56.323	33.453	83.351	-276.723	15.183	18.448	244.266	100.487		90.336		3.771	64.794	60.274	97.773	-21.865		14.387		-36.365	-7.759	100.036
140	44.448	-1.286	39.773	-224.454	5.348	303.614	-171.213	62.253		152.571		27.944	54.334	-28.588	98.621	46.919		6.322		15.579	-48.261	170.721
140.133	5.575	-17.092	54.23	-129.832	142.223	67.621	19.293	76.162		126.009		-5.857	90.384	77.108	79.422	58.795		23.148		-6.935	48.476	128.308
140.267	52.069	-7.996	-8.904	-77.724	-5.028	81.138	15.809	50.051		217.601		4.641	-17.931	53.454	125.696	111.419		25.764		82.018	-17.873	181.638
140.4	57.29	-141.768	22.707	-131.639	-2.911	-50.032	213.11	94.36		214.27		43.973	92.255	-24.201	120.951	-19.242		67.705		35.219	-3.301	91.869
140.533	74.824	141.858	94.922	17.077	141.879	188.667	-165.176	35.392		111.111		5.494	-41.492	22.397	68.197	21.988		44.721		58.028	13.761	136.852
140.667	8.172	0.508	102.546	-49.524	141.415	145.329	40.914	68.592		270.852		13.93	-19.322	45.333	78.1	-2.401		8.579		64.448	4.338	165.634
140.8	57.982	-11.231	151.605	-185.899	-142.676	46.809	47.402	85.524		239.042		-10.227	28.845	47.044	113.262	-207.132		33.146		82.074	-101.396	147.825
140.933	12.119	-19.671	222.079	2.464	283.53	48.171	27.302	86.446		188.755		23.977	-13.494	26.557	76.051	15.634		30.624		-11.375	101.394	130.769
141.067	-24.67	-0.276	185.292	7.407	-144.016	88.713	46.124	54.652		200.187		11.793	42.857	34.693	100.974	-121.036		-2.987		24.636	4.955	207.86
141.2	28.963	0.137	136.048	33.843	143.005	65.824	20.204	56.186		231.682		77.534	-14.558	36.928	125.591	-156.667		75.653		42.639	-144.779	162.665
141.333	26.338	-4.149	125.959	64.545	-9.186	153.536	100.25	77.733		287.73		112.059	-101.812	40.228	111.941	-97.27		23.749		-20.421	-3.569	207.789
141.467	50.511	141.794	96.177	-15.794	281.854	-84.936	162.897	31.709		134.516		10.908	-75.127	11.982	107.744	-114.052		42.169		-4.126	-2.989	150.645
141.6	68.322	142.096	163.777	-12.734	142.878	54.642	-79.828	70.303		89.912		49.585	-152.968	35.396	118.376	-60.862		67.739		5.131	-4.904	85.661
141.733	80.727	-2.848	100.348	-8.993	3.662	4.169	119.193	15.958		193.597		20.206	-41.139	6.554	51.846	-94.882		126.24		4.491	105.294	115.231
141.867	54.203	-1.965	108.075	-9.235	143.448	-103.536	439.178	31.396		69.821		21.816	-109.247	-34.173	80.67	147.867		127.628		-5.242	-21.783	121.063
142	105.877	-143.908	36.799	33.624	3.676	155.046	58.024	51.803		37.449		6.296	-93.859	-13.158	172.05	25.517		109.512		20.909	-1.275	116.047
142.133	86.746	142.746	64.409	10.387	141.955	-107.653	39.623	37.597		59.296		2.236	-179.075	68.102	73.227	62.655		55.034		1.17	-106.841	86.854
142.267	62.558	-2.343	16.553	59.916	141.712	45.243	27.511	66.988		-2.719		2.382	-64.203	32.906	33.88	61.548		70.271		0.371	-16.984	14.023
142.4	138.009	10.594	90.904	53.539	146.103	94.003	4.488	-13.688		21.05		-11.79	-301.46	-38.731	130.943	177.041		66.193		-28.609	114.354	66.627
142.533	102.569	-6.463	105.064	3.801	3.657	-53.48	173.26	51.808		-6.63		18.235	-178.428	151.447	50.142	147.877		21.981		9.863	16.496	19.391
142.667	50.269	141.885	79.008	-36.458	-13.382	123.133	81.331	14.29		157.37		5.862	-88.937	74.055	95.923	106.303		79.154		-6.634	-167.754	96.826
142.8	77.104	5.55	114.884	20.672	26.987	10.521	-26.169	-15.509		-140.747		-12.824	-234.272	58.317	96.314	128.619		49.971		-12.42	-58.726	-12.886
142.933	46.919	17.181	29.741	64.007	-144.781	25.906	86.229	7.903		12.183		12.14	-185.309	34.047	38.685	63.318		40.558		-6.688	78.386	56.763
143.067	34.876	-144.95	83.575	25.887	-140.787	-8.041	90.574	28.369		-14.532		1.223	70.842	-35.206	61.035	149.437		41.139		22.68	-101.14	33.261
143.2	50.836	5.719	157.491	101.53	142.696	23.008	43.945	16.619		-22.39		-20.995	-26.265	199.624	-6.289	111.903		-12.769		-13.818	-25.297	40.732
143.333	34.272	142.098	193.143	81.685	141.69	-11.366	76.076	-16.789		6.476		-3.162	48.867	25.096	42.498	145.004		-19.912		-42.378	22.166	-58.429
143.467	25.136	-141.975	187.838	-25.459	-4.549	2.97	38.513	-3.51		-36.09		-12.574	116.991	65.565	55.465	35.313		-8.308		-43.667	-24.9	-27.94
143.6	12.238	283.824	145.315	40.155	-6.56	-1.428	60.075	9.817		-42.595		40.242	145.061	56.787	115.147	81.665		46.154		-46.231	79.458	-5.725
143.733	2.792	-6.409	85.569	-12.666	-145.199	-1.048	87.908	-19.043		-8.425		31.856	163.863	-19.053	48.164	-8.253		6.255		-53.981	10.82	-34.786
143.867	-7.742	142.08	117.218	89.216	280.721	-14.762	91.093	40.287		-30.208		103.004	153.113	68.256	47.935	13.502		18.109		-25.665	-122.851	-24.856
144	29.682	11.087	68.669	2.027	-144.757	-46.27	15.437	9.437		3.686		55.512	137.149	32.841	74.963	-3.307		37.98		-40.531	140.21	-46.545
144.133	7.109	-142.042	265.488	105.508	142.104	-51.784	16.156	-10.862		-20.871		64.359	128.978	18.506	95.86	134.546		26.965		-45.106	7.271	-37.162
144.267	-4.896	141.875	66.613	67.383	-31.566	-143.599	11.936	-11.405		-10.147		86.916	132.673	46.74	84.145	31.6		38.064		-22.073	-12.28	90.474
144.4	9.793	8.444	31.842	170.844	-2.885	148.939	21.148	14.867		-7.705		21.58	173.103	65.78	95.324	71.584		51.846		-10.384	-131.681	13.235
144.533	25.685	-1.724	15.782	100.183	143.27	-111.521	84.137	-27.916		-11.049		-3.806	47.013	42.69	23.436	197.251		81.011		-19.065	-6.451	23.037
144.667	35.312	-141.987	-30.569	3.362	-15.208	2.358	68.399	4.915		-26.103		-15.457	131.385	35.429	74.787	86.013		56.079		-12.706	-7.881	-18.999
144.8	-12.922	142.505	-34.327	94.346	-11.502	110.323	59.827	-13.282		-8.54		53.007	62.794	33.896	56.536	38.796		65.457		-3.546	4.13	-6.145
144.933	22.954	141.86	-26.266	71.658	-9.589	15.457	36.891	30.762		-43.604		24.28	55.601	18.619	65.368	-76.531		21.216		-3.819	115.621	15.205
145.067	-2.427	-142.686	12.887	-37.442	-279.113	-30.511	-26.072	-6.458		-8.52		22.81	57.595	16.002	44.419	161.35		58.73		-4.436	-126.099	91.332
145.2	28.809	241.206	20.93	150.396	-319.838	-89.989	11.64	-36.94		-13.968		-14.082	25.724	15.416	66.494	267.386		67.019		15.949	-9.779	43.118
145.333	2.663	86.778	50.887	21.057	-101.104	-125.725	-12.687	-25.273		37.32		33.837	17.152	136.213	119.704	66.981		-25.041		-6.173	102.589	111.812
145.467	14.408	41.185	35.534	-54.191	-21.506	-122.342	-8.461	-30.77		-66.47		57.251	-15.196	-98.869	-46.067	80.481		111.177		-10.679	-2.966	57.442
145.6	14.751	72.195	91.663	301.065	8.711	-218.81	41.826	-39.807		-48.09		78.053	40.685	26.626	63.373	-27.884		84.113		-19.923	-32.684	60.944
145.733	-2.298	-44.968	94.82	12.286	-40.321	-225.594	73.092	-51.426		-65.202		13.454	11.777	10.889	48.691	92.008		62.812		-35.777	-12.614	49.17
145.867	-4.464	145.371	49.986	45.29	16.439	-255.562	4.512	-71.251		-78.808		26.013	75.737	-109.916	40.479	-109.863		48.804		-25.158	12.892	83.429
146	-19.985	-48.553	154.887	70.995	52.934	-182.358	27.688	-142.495		-49.026		32.164	174.25	-14.82	30.109	76.496		36.668		-18.468	-29.796	82.784
146.133	24.097	150.697	127.569	-46.244	26.873	-36.301	-10.291	-135.699		-45.111		60.029	56.159	52.782	85.823	-4.273		74.669		-38.511	21.1	93.101
146.267	9.383	13.791	48.018	-175.464	-15.173	-31.016	5.263	-168.723		-55.66		34.459	28.929	-48.469	35.937	144.127		85.875		-13.124	2.573	26.408
146.4	-8.867	6.052	134.656	-17.735	60.64	19.854	-2.937	-149.862		-54.899		78.472	85.807	-15.674	79.656	-14.1		55.879		-97.474	-18.455	69.433
146.533	-5.506	5.897	100.876	-11.751	111.338	-6.896	-10.6	-183.337		-34.699		18.356	37.01	-35.194	59.403	17.181		59.243		16.13	-88.16	56.397
146.667	2.707	-148.522	-4.772	28.396	92.182	3.643	6.262	-156.818		-158.929		47.45	-11.15	137.458	123.766	-160.473		131.242		18.396	-88.142	61.842
146.8	6.582	86.706	166.14	-25.35	76.728	89.199	-5.719	-128.541		43.977		23.789	55.719	-67.348	45.004	-282.036		-88.168		-16.816	-135.156	54.253
146.933	-9.467	10.37	99.316	-11.913	63.434	85.555	-2.473	-78.002		-72.567		56.441	6.453	-19.004	105.842	-189.351		38.337		-36.819	-66.855	81.457
147.067	0.735	46.837	82.343	-17.2	41.563	129.569	0.631	-124.904		-105.632		52.224	57.194	-30.233	43.164	-238.384		8.05		-121.904	-82.881	73.717
147.2	-10.913	100.732	77.439	25.903	15.812	29.935	-3.339	-73.335		-101.581		27.992	65.57	61.369	82.916	-190.796		35.47		-164.511	-81.968	70.643
147.333	-9.303	40.053	61.643	127.286	-19.169	70.085	3.74	-59.422		-112.484		24.945	64.233	-12.098	45.758	-107.204		0.89		-70.809	-79.651	65.423
147.467	20.47	34.925	70.489	27.725	-21.988	73.343	-4.894	-39.418		-116.928		13.384	20.592	24.848	44.21	-155.911		7.859		-69.863	-42.005	77.533
147.6	-0.998	105.229	69.47	-16.017	31.771	55.728	6.078	-30.93		-116.554		-4.403	16.208	1.58	42.185	-135.872		62.164		-56.266	29.236	61.282
147.733	10.304	21.803	18.382	32.191	12.586	109.914	-17.597	-2.417		-145.526		18.023	12.177	27.304	35.977	71.636		-14.021		-66.569	-62.428	45.286
147.867	-4.804	-59.733	9.448	-66.771	15.26	49.446	3.463	-11.934		-87.334		8.459	27.341	-21.269	32.058	40.776		9.607		-126.496	-18.959	67.409
148	-4.543	45.016	158.127	67.876	24.611	152.06	-6.83	-14.746		-34.558		-22.377	-23.799	137.257	126.144	120.202		-0.866		-24.658	-25.723	37.385
148.133	-8.397	135.078	60.844	6.68	-23.076	-59.467	-13.909	11.59		-279.744		-30.041	32.893	-69.632	37.43	140.397		12.773		-137.937	-5.054	129.306
148.267	13.845	24.731	58.195	105.283	10.932	-29.507	5.643	-48.428		-245.407		26.959	85.086	73.646	-8.88	164.54		-20.178		-73.31	-43.416	99.747
148.4	-20.107	-13.987	84.892	37.101	9.612	-17.021	-3.946	-15.782		-255.381		10.28	151.084	7.74	23.96	193.216		24.565		-51.675	13.207	11.529
148.533	3.504	-115.193	100.12	24.202	-19.09	40.609	12.668	-52.836		-288.243		25.584	36.141	9.225	23.477	151.794		96.299		-52.29	5.711	35.214
148.667	-8.709	97.52	110.137	25.653	-28.435	75.74	23.746	-39.871	4.251	-233.786		35.124	21.976	22.417	77.883	176.341		98.493		-50.012	-147.291	1.679
148.8	11.582	-43.213	60.527	58.345	-21.144	158.372	-13.441	-37.208	-2.28	-214.338		26.34	54.313	-50.994	85.335	122.273		66.569		2.078	-9.225	-18.51
148.933	4.715	1.429	78.348	114.504	22.335	39.363	-0.447	-85.874	-135.388	-222.362		-13.296	171.496	-137.724	54.232	47.737		-17.811		24.415	-24.509	50.756
149.067	13.605	-14.483	71.474	37.723	36.183	52.395	12.085	-78.4	136.35	-249.523		17.767	189.672	-259.95	97.004	58.365		32.852		116.853	151.434	113.911
149.2	-5.475	0.624	91.335	95.815	54.671	20.696	-14.15	4.158	-135.245	-251.368		17.336	44.607	-135.968	60.21	-17.275		18.406		56.804	-36.15	12.355
149.333	6.532	-9.755	153.995	158.281	66.532	151.284	12.389	-30.367	2.567	-311.103		-5.62	87.697	30.249	123.653	-63.694		7.025		-12.564	-23.827	8.32
149.467	-3.69	-27.41	-83.609	231.956	37.708	-77.66	-10.473	14.666	-0.795	-385.265		41.26	53.163	-93.803	33.066	24.984		-4.237		-26.026	-4.622	23.649
149.6	-1.872	-16.125	51.698	46.454	43.758	-15.161	-15.419	42.961	136.003	-381.019		40.615	-51.158	-270.646	84.329	53.582		-8.662		38.333	-28.416	19.955
149.733	4.513	-10.183	2.533	128.112	62.262	-70.415	-5.79	65.96	-135.249	-338.777		79.988	198.385	-20.143	75.521	130.116		21.279		7.889	-28.468	-17.386
149.867	-11.311	17.308	-34.241	125.566	109.492	-26.524	126.314	97.53	-135.245	-380.901		32.519	67.133	-224.27	23.914	167.68		3.52		-22.832	29.529	22.297
150	-2.751	9.036	-71.104	132.406	31.799	-17.278	-7.483	44.177	135.689	-337.167		-17.416	-42.135	-198.944	18.614	254.321		-9.694		18.99	-46.469	-15.423
150.133	-17.024	-8.635	-41.424	25.515	66.627	-10.65	19.426	7.61	4.806	-283.328		35.429	15.282	-223.415	47.48	333.174		26.121		27.999	23.113	-11.133
150.267	-2.697	-104.75	-48.028	38.009	40.081	-33.479	41.203	42.279	12.293	-112.171		-18.746	5.962	-156.82	18.167	315.915		-7.066		66.674	-14.187	-7.881
150.4	-4.98	94.279	28.251	-87.555	38.45	4.786	42.539	34.403	13.684	-276.542		-26.001	-31.408	-128.618	-0.755	285.405		-5.013		50.375	32.788	-18.634
150.533	6.24	-17.918	-0.964	55.117	-8.958	20.198	79.046	42.735	-135.583	-194.314		32.339	-14.096	-74.772	60.375	260.759		-29.277		49.314	-16.6	7.578
150.667	30.376	-16.647	28.501	88.672	51.208	-11.376	55.139	51.328	137.932	-155.529		24.223	-20.869	20.976	21.658	216.84		24.681		5.598	17.928	11.55
150.8	-26.881	-13.368	113.879	6.39	20.106	192.548	55.155	20.639	-135.599	28.612		23.37	-341.728	-291.063	28.937	315.216		22.555		5.175	-24.26	19.328
150.933	-2.125	-1.138	71.634	-18.763	11.323	-50.794	58.469	40.484	137.226	7.54		38.152	-226.457	-86.325	25.013	185.531		17.657		-9.905	-53.995	151.626
151.067	12.994	-39.862	102.049	4.843	-1.3	202.419	47.17	23.134	-135.893	-57.413		8.77	-214.322	-101.757	33.373	223.352		61.61		7.204	-154.617	-23.311
151.2	16.898	-19.825	51.759	23.475	-13.246	-50.031	45.541	57.916	12.094	54.585		20.412	-206.021	-54.049	49.312	144.693		63.023		-10.085	109.422	15.155
151.333	-11.194	-92.377	107.127	25.807	-4.481	18.317	66.917	117.72	138.341	-48.345		36.173	-220.647	-62.754	65.985	131.14		47.108		8.321	-21.486	40.868
151.467	-10.909	3.75	135.968	14.43	4.981	56.991	48.9	54.106	-270.632	0.852		-24.056	-56.405	-242.483	26.01	147.916		44.883		4.641	-44.509	18.198
151.6	-10.738	20.018	143.177	75.318	24.64	-42.756	60.936	50.263	139.368	164.55		40.413	-280.558	-113.346	-10.693	170.081		41.923		-2.556	-1.637	87.485
151.733	-0.637	105.999	141.637	67.518	-12.916	-59.631	81.554	79.726	-136.811	73.637		7.396	-252.587	-105.795	22.566	149.533		66.347		-12.824	71.807	-23.16
151.867	-20.236	-17.574	90.234	-22.473	31.051	-40.481	57.873	44.994	8.938	186.194		-36.669	-216.969	-158.647	81.84	150.852		24.589		63.399	177.76	75.549
152	38.504	-18.768	69.747	9.153	36.545	98.089	72.985	32.817	9.693	154.957		-130.553	-186.209	-7.599	50.243	125.215		-13.352		13.834	6.108	65.203
152.133	-6.339	-5.027	104.906	41.038	66.296	-55.489	25.252	-23.165	667.367	130.918		-94.989	-135.661	-143.64	89.091	123.671		33.154		38.511	16.46	-126.563
152.267	8.43	-37.387	129.382	17.944	104.665	120.597	49.223	2.104	137.78	81.576		-10.001	-153.351	-175.374	67.411	177.357		6.723		-79.11	-5.269	47.831
152.4	-10.736	-133.224	208.508	-37.593	46.541	138.953	55.659	-2.139	2.317	69.718		-8.878	-156.328	-152.967	67.825	178.837		6.868		39.254	-4.28	19.156
152.533	1.305	-154.842	164.261	-148.635	46.995	-72.031	68.102	-13.741	136.664	53.456		8.735	-215.843	-171.333	46.846	210.588		8.513		28.053	-5.415	23.76
152.667	-9.674	-154.094	91.54	-175.519	40.827	18.041	16.848	-21.786	-138.218	42.878		-14.636	-180.04	-15.659	12.368	164.461		-35.661		23.47	-22.854	32.567
152.8	3.894	-56.743	157.565	-175.916	8.683	-1.156	46.613	8.476	137.232	51.115		59.51	-52.588	-43.186	15.156	165.863		19.234		-23.666	-8.631	-26.455
152.933	5.97	-47.871	28.795	-231.998	34.431	16.003	29.683	36.766	138.699	-41.892		102.074	25.488	26.329	49.475	139.098		9.745		24.427	-282.597	8.984
153.067	-38.882	-154.697	-10.58	-190.372	5.541	106.017	40.539	58.185	-16.508	58.152		48.002	23.012	67.35	85.008	153.922		-43.418		3.666	71.51	98.451
153.2	-160.133	-47.82	-0.161	-303.854	30.315	-9.655	35.48	10.456	-138.929	6.794		9.181	56.187	5.673	27.286	141.57		-9.028		125.675	-86.087	17.249
153.333	-169.007	11.938	-10.872	-427.961	-153.514	-92.561	39.988	-16.845	-7.606	31.192		72.507	81.991	60.021	99.859	38.68		5.41		13.314	-116.869	-113.385
153.467	-133.408	-51.384	32.022	-255.634	166.572	-17.58	49.319	82.463	-13.589	-128.052		23.182	30.285	37.402	19.658	175.959		8.323		-29.018	-26.919	-12.289
153.6	-133.422	47.41	69.026	-219.367	-6.552	-5.479	35.19	118.771	-15.826	13.033		122.59	87.829	6.382	64.528	64.598		-34.354		-119.532	-153.298	128.379
153.733	-76.903	-40.378	28.654	-189.726	-2.787	-182.066	56.82	37.733	-24.241	130.058		43.553	134.05	1.61	67.64	120.278		-32.821		47.727	19.538	-8.98
153.867	-65.075	95.565	5.241	-162.644	0.702	-18.225	-53.181	13.694	138.805	-59.621		24.041	131.063	25.445	45.836	224.701		-28.294		-3.326	96.052	88.691
154	-90.591	-2.224	21.931	-125.293	13.221	-94.157	55.405	22.619	-136.741	-65.809		57.816	-9.664	29.085	106.433	276.93		-31.011		-2.766	-25.149	81.644
154.133	-54.884	-87.828	6.732	-227.229	-22.044	-98.455	135.37	-36.015	139.459	-143.607		21.591	111.777	5.82	89.222	111.975		-18.308		-16.822	-12.086	42.343
154.267	-56.67	20.888	3.777	-264.44	15.893	-152.307	-70.838	48.26	-137.264	-232.305		26.812	167.597	-8.079	2.874	165.999		-23.655		13.535	37.497	-61.619
154.4	-62.801	-2.663	-177.243	-279.756	46.925	-138.816	36.896	46.504	-25.946	-269.315		-0.835	15.136	-6.3	-6.928	70.176		-10.854		-24.62	-42.803	48.572
154.533	-19.727	-52.862	-515.853	-331.096	109.229	-110.97	57.84	20.292	-22.606	-209.489		59.471	93.342	-58.099	37.531	98.066		21.749		-55.138	20.934	9.911
154.667	-8.447	-131.202	-416.359	-228.982	10.641	-149.159	29.134	5.678	-15.831	-158.09		23.177	116.48	133.6	18.607	74.314		-131.162		-68.678	40.392	15.754
154.8	-102.399	-31.416	-355.753	-280.813	155.731	-131.947	19.623	-28.843	136.785	-99.243		4.601	42.146	-66.804	18.463	17.326		47.083		8.943	-147.69	-6.608
154.933	-80.014	-23.68	-307.819	-250.845	40.437	-186.701	46.387	-51.79	-16.175	-7.208		-32.009	153.89	-9.274	-22.55	-162.404		14.009		-150.536	138.958	16.455
155.067	-67.598	-37.01	-276.743	-239.917	-7.68	-149.029	17.277	31.033	-6.186	11.073		23.242	79.55	-37.607	88.014	187.901		-22.291		-196.156	7.134	12.735
155.2	-85.996	-58.142	-267.704	-191.419	10.283	-137.089	38.805	7.547	137.748	-37.738		66.092	77.678	48.465	142.939	25		-25.462		-168.359	-57.984	-54.173
155.333	-33.641	10.426	-275.007	-143.145	-20.771	-79.032	41.961	-13.623	22.924	-91.689		15.842	55.624	1.706	18.242	-93.625		-20.721		-141.202	-8.158	-24.446
155.467	-36.16	28.492	-289.523	-132.92	-11.728	-57.19	50.917	59.827	-136.165	39.253		64.581	67.715	12.239	33.19	-145.137		-18.771		-136.031	-16.955	-15.792
155.6	-13.74	153.228	-318.035	-121.174	13.531	-11.434	8.702	14.708	138.178	-38.227		87.116	-24.495	-24.904	135.108	-157.966		-16.15		-88.564	-7.5	-144.903
155.733	-37.056	29.074	-303.185	-154.817	28.4	-49.33	24.898	51.379	15.311	-2.269		64.857	-19.132	-45.049	120.799	-287.086		53.319		-259.944	-19.521	-175.858
155.867	-17.661	-8.859	-290.019	-113.26	41.583	-147.874	49.099	8.915	27.601	120.155		39.526	-28.781	-131.676	104.851	28.142		3.122		-99.554	16.44	-156.575
156	-34.664	21.167	-276.02	-75.687	38.94	-80.506	11.493	30.548	-138.617	158.299		68.013	77.827	-14.348	-7.555	14.629		-16.333		-96.702	2.352	-166.503
156.133	55.341	11.675	-348.824	-39.47	18.466	-8.697	4.12	10.717	136.527	72.776		85.622	184.285	-221.636	-46.093	-24.389		-21.78		-88.802	-29.854	-143.285
156.267	25.715	13.838	-174.894	12.442	51.349	-48.791	15.614	4.052	-135.136	77.652		64.936	106.357	-169.817	-6.302	-17.795		-15.271		-69.351	-87.855	-163.528
156.4	-18.505	-111.432	-112.76	8.238	38.389	-260.144	16.861	9.423	136.725	39.143		55.331	-67.471	-191.405	66.667	87.985		-21.258		-70.349	14.148	-48.283
156.533	11.666	-0.903	-63.237	36.325	61.056	-164.177	-15.176	-0.709	24.149	14.206		65.683	99.858	-273.137	123.88	-97.335		0.573		-50.137	132.08	-113.472
156.667	29.583	-32.347	-37.173	-25.064	7.079	-113.605	109.96	-17.589	-135.209	-27.008		38.203	98.227	-159.081	40.6	-7.959		28.66		-115.996	30.416	-175.655
156.8	33.774	-11.609	-32.769	-33.259	86.768	-9.936	44.162	5.094	136.359	29.791		-3.709	21.291	-138.287	77.346	-75.741		52.972		-68.202	-33.507	-112.22
156.933	60.587	-24.719	-4.269	-13.876	28.917	-54.336	31.931	-17.56	-136.392	50.442		66.659	45.304	-88.209	34.157	182.853		33.19		57.372	-14.436	-124.177
157.067	53.554	16.634	-44.437	-27.28	34.421	-51.194	-62.244	18.927	135.604	122.911		76.941	16.57	-102.86	47.735	166.145		10.5		-23.254	-7.29	-116.583
157.2	32.634	13.435	29.933	19.779	37.385	-60.089	40.379	-21.276	8.276	150.804		37.464	33.967	-131.727	47.543	129.076		76.288		-42.403	-18.733	-108.395
157.333	54.346	30.169	22.386	-30.869	-3.691	-66.797	-5.958	-2.639	16.629	146.978		-11.724	56.352	138.266	54.866	86.262		-127.451		-90.25	35.503	-112.444
157.467	76.981	140.279	-26.747	-9.648	20.972	16.872	148.201	-6.967	-135.838	78.189		-9.364	124.302	-79.009	46.313	18.877		201.364		-109.346	-32.779	-135.262
157.6	68.274	50.63	-4.532	38.144	36.252	-128.953	42.419	1.96	-21.645	334.042		10.52	10.682	-13.453	29.752	36.808		46.992		-41.807	2.677	-145.586
157.733	96.144	-88.195	-13.939	-93.945	49.505	-14.947	38.703	-20.385	-23.81	-26.416		-4.083	21.764	-17.168	30.804	18.287		-15.274		-68.149	22.43	-141.521
157.867	29.143	47.575	-9.648	29.174	30.714	3.157	-65.646	14.569	-30.25	121.219		-12.659	32.618	-135.199	23.164	-103.086		-18.883		-91.615	-129.446	-126.73
158	43.558	41.367	11.339	-72.118	50.906	-30.852	55.516	-20.286	-21.143	112.564		-20.38	63.855	-18.689	2.551	202.461		-16.574		-25.968	37.482	-121.693
158.133	58.721	58.409	173.324	28.854	61.653	-16.828	27.95	10.288	138.305	143.686		-147.876	31.81	-5.992	14.187	73.594		16.439		-8.027	20.474	-72.326
158.267	35.083	62.293	101.472	-93.918	-12.145	86.532	46.903	30.811	-42.172	283.968		-195.645	109.451	-19.851	-5.004	89.093		-37.126		61.652	-51.029	34.371
158.4	136.91	184.531	172.314	-86.214	19.012	-219.183	48.586	-2.282	-21.976	104.497		-190.88	1.243	6.26	3.668	60.755		-22.235		18.696	108.91	116.525
158.533	71.546	106.485	117.069	-35.457	60.582	67.992	-3.034	12.663	-136.79	56.619		-172.802	38.722	29.068	16.234	-69.869		71.394		48.515	84.929	40.88
158.667	66.146	24.704	91.488	-5.847	40.977	-45.163	-3.985	-5.549	-20.021	36.209		-165.59	24.761	72.743	-18.026	-10.354		25.643		131.251	-87.738	106.649
158.8	36.936	35.142	47.074	-3.506	85.333	-35.08	103.926	-1.313	-16.787	236.082		-170.864	28.061	75.7	14.281	-22.095		19.965		-55.794	-6.148	111.789
158.933	66.559	110.109	-41.339	31.341	82.49	10.646	-104.6	11.785	-136.089	312.564		-226.804	26.194	125.868	-13.221	44.972		63.18		58.019	13.847	127.725
159.067	10.57	74.214	-9.001	17.171	26.161	3.263	8.823	-9.686	135.993	137.061		-230.71	31.819	123.959	23.01	99.809		71.837		68.409	19.911	145.711
159.2	14.408	-78.316	-12.11	23.461	48.507	4.004	49.386	1.443	8.195	74.151		-219.288	33.015	154.819	-14.634	1.615		47.582		73.047	125.686	122.382
159.333	69.056	-13.73	-17.597	26.691	24.66	22.689	2.277	-2.505	-275.89	67.258		-109.166	26.289	123.565	-1.695	-86.118		64.802		99.613	0.576	145.356
159.467	44.494	-22.608	237.275	40.123	46.088	52.212	-35.628	-17.961	269.188	29.985		-41.006	67.667	80.284	4.298	21.202		90.733		40.327	10.337	123.077
159.6	76.354	-24.768	29.44	-43.315	36.993	79.086	-16.188	-51.905	-136.139	17.276		-11.502	44.556	60.585	-18.572	87.106		40.774		96.227	-14.04	99.27
159.733	161.967	34.901	105.371	183.296	70.296	98.957	58.818	-73.423	138.727	-57.989		18.709	30.761	24.499	-22.981	22.249		20.999		97.587	27.386	83.978
159.867	49.433	93.123	199.287	203.406	55.742	124.249	-139.564	-132.69	5.969	45.505		6.787	58.986	66.009	25.231	18.338		11.273		50.636	14.463	63.277
160	11.294	-45.034	151.753	82.193	57.029	122.185	-207.197	-120.865	9.217	38.508		99.754	92.971	59.856	9.938	-42.33		-128.294		218.654	47.324	53.987
160.133	92.328	53.948	145.754	158.309	90.828	76.256	-108.028	-98.494	17.455	66.534		146.88	49.679	85.543	-0.695	-110.343		183.46		-67.225	9.787	60.055
160.267	-49.582	4.066	217.261	-22.973	59.992	55.384	-9.286	-162.106	30.028	1.377		-21.653	120.953	145.164	-18.346	-166.397		66.002		210.59	52.895	77.474
160.4	-47.408	46.947	118.88	55.95	46.416	9.844	-81.135	-145.626	8.033	-5.755		71.482	36.862	47.551	8.739	-175.548		59.465		80.353	7.733	92.435
160.533	34.292	197.331	42.67	-6.147	33.904	20.181	-184.044	-136.227	-136.334	29.931		34.529	113.937	20.561	-48.352	-69.899		28.473		59.739	3.268	104.353
160.667	-4.704	-51.266	198.468	-16.359	43.813	-2.916	24.493	-115.1	137.08	-8.375		81.974	34.624	69.466	-38.953	-130.314		-30.916		130.57	41.57	92.348
160.8	17.977	206.146	-129.033	33.318	128.932	-6.23	-66.387	-103.699	10.845	23.537		44.494	48.238	93.883	-39.329	-127.745		50.795		157.65	45.151	22.993
160.933	51.041	7.076	3.787	-19.264	56.317	24.695	-132.65	-65.451	17.599	-16.513		152.728	27.616	91.938	-37.47	-244.773		111.537		181.037	45.903	21.886
161.067	-235.688	45.803	162.098	-19.892	83.183	13.567	-15.175	-58.524	27.752	-0.372		137.107	51.51	73.819	-33.075	-80.893		39.915		39.71	62.543	22.01
161.2	-103.933	94.714	116.255	-7.026	6.243	-37.808	-25.447	4.676	7.863	2.379		98.465	61.716	62.628	-31.479	-283.643		50.12		108.996	-67.712	-18.679
161.333	-192.393	-11.071	82.945	29.574	6.045	56.322	-23.735	-5.639	9.493	7.038		33.995	11.929	61.895	-5.485	-250.674		-14.336		130.949	153.672	54.283
161.467	-220.611	36.148	99.762	102.318	3.681	227.054	-101.35	-9.238	8.685	12.257		121.117	6.198	63.034	-28.939	-179.99		-10.871		156.549	12.599	36.319
161.6	-247.6	19.79	104.562	-4.147	-7.768	-78.124	-72.304	-39.377	-140.277	14.302		141.817	30.936	30.769	-3.287	-195.995		39.651		164.088	59.24	59.356
161.733	-100.522	17.181	93.518	27.006	14.785	234.393	-38.722	-4.146	-20.963	18.151		140.45	-21.216	53.847	-37.166	-149.806		81.877		186.249	36.245	19.535
161.867	-89.043	-29.906	125.099	75.473	73.146	9.127	-95.754	18.04	-16.2	-32.006		133.223	-3.857	79.923	25.475	-101.321		14.917		281.443	-53.693	62.186
162	-112.45	-74.251	82.377	87.526	51.539	200.212	-18.209	13.53	135.903	18.34		78.957	-31.508	41.689	-13.492	-108.191		49.288		106.575	76.716	77.085
162.133	-156.906	-131.472	90.556	54.103	83.652	46.689	33.174	49.655	-14.305	13.009		112.038	-126.193	45.271	69.471	33.358		-12.055		174.219	90.865	39.362
162.267	-116.611	-96.476	85.404	61.678	40.881	17.169	-58.092	31.786	4.9	-10.273		77.896	-130.982	58.045	42.444	108.314		-12.838		101.761	153.61	73.82
162.4	-130.916	-66.828	150.012	0.055	67.451	-28.003	-87.064	38.558	1.297	-0.842		92.51	-128.67	34.217	126.593	130.55		38.547		65.864	20.663	64.185
162.533	-133.617	-127.221	135.007	3.784	10.744	15.911	-61.532	16.932	5.187	-4.976		100.363	-110.828	34.376	11.19	190.705		12.274		77.065	-90.561	31.085
162.667	-113.648	-158.259	143.799	70.952	64.193	37.108	-101.363	21.254	135.567	27.066		151.234	-135.871	266.589	-5.134	125.86		-1.923		16.348	138.152	46.583
162.8	-153.064	-203.073	132.544	-6.758	20.845	37.551	-3.262	19.338	-136.097	-38.765		99.799	-177.768	-154.968	60.298	12.508		36.191		13.014	-64.344	16.38
162.933	-107.597	-152.031	158.149	-2.961	69.066	42.189	-23.745	12.168	136.624	13.262		80.425	-149.348	105.119	41.034	175.384		73.977		54.528	52.659	14.433
163.067	-97.945	-173.535	134.308	40.673	61.883	39.112	-35.104	61.693	2.072	5.553		40.595	-97.489	85.101	16.501	179.528		15.763		54.723	50.131	43.357
163.2	-98.568	-154.353	67.852	63.229	111.544	43.664	113.957	32.244	136.602	-8.959		52.619	-65.368	110.974	-4.384	96.129		21.506		128.393	167.357	79.985
163.333	-108.282	-107.982	18.398	82.283	81.504	35.073	182.629	52.968	-134.85	-0.887		29.443	-125.085	72.757	-16.136	97.381		84.896		79.443	-83.486	81.524
163.467	-84.897	-122.306	4.396	229.462	48.065	72.315	86.009	60.718	13.985	-15.866	0	69.514	-58.095	68.623	-45.49	128.218		3.839		67.912	151.821	15.576
163.6	-58.193	-122.547	20.458	111.583	24.134	35.867	84.586	26.508	138.518	13.439	161.892	114.761	-32.506	200.395	-38.047	39.803		68.835		139.353	-87.549	40.713
163.733	-25.072	-85.786	5.055	87.148	5.681	19.601	8.639	19.433	21.025	15.645	14.377	86.487	-33.62	107.038	-26.125	84.512		62.924		49.152	-46.302	117.222
163.867	-19.118	-126.053	-26.056	51.148	25.629	29.926	99.806	24.718	-15.398	-4.362	162.136	153.801	9.629	54.241	-24.744	279.781		8.651		55.655	180.898	107.279
164	-18.48	-15.481	9.362	16.687	41.848	148.057	65.588	25.881	-8.346	27.623	10.004	112.371	-34.516	126.905	-6.692	74.592		47.086		108.475	-98.475	54.104
164.133	19.967	-281.591	38.922	80.877	155.551	-16.914	81.688	5.602	19.066	-46.297	166.414	59.586	-103.866	69.419	-69.834	139.041		50.162		44.589	-1.543	58.316
164.267	18.709	13.277	47.351	52.939	-30.648	8.323	78.225	67.038	34.417	1.474	95.939	91.706	-50.283	75.568	-7.117	159.472		56.97		78.656	14.534	53.113
164.4	-16.544	-30.663	30.643	-57.587	152.184	68.823	35.506	74.652	-1.479	-8.126	69.84	50.418	-15.485	69.6	20.934	217.986		40.008		53.402	102.138	65.647
164.533	-9.926	-138.917	73.171	59.493	2.593	64.592	35.176	36.751	5.973	-10.774	35.277	18.835	-9.014	22.092	91.814	118.638		21.484		127.435	-84.226	39.185
164.667	5.92	-45.5	70.909	81.688	-149.959	71.352	27.111	24.764	13.289	27.023	139.645	6.245	118.32	21.72	-14.497	152.198		88.057		24.664	-24.963	10.675
164.8	1.533	-34.578	137.594	172.782	299.98	78.904	-3.44	75.859	-7.451	24.725	-10.855	80.964	17.063	68.863	37.244	-33.035		46.732		65.633	47.007	40.257
164.933	14.885	-145.787	103.212	101.936	17.167	99.847	17.885	95.26	24.409	-8.435	41.691	107.535	-255.896	70.83	-7.731	151.217		38.975		39.879	104.009	-18.917
165.067	-29.095	284.57	30.306	39.179	150.246	12.28	12.321	26.195	38.774	-2.673	-25.299	81.74	22.156	110.183	18.962	313.087		90.625		35.253	154.466	29.261
165.2	-8.549	-279.469	47.194	-8.156	-151.364	45.798	6.417	73.362	-5.371	5.381	11.382	103.004	31.632	13.697	43.827	153.026		7.966		39.162	29.684	-22.084
165.333	-13.421	-16.037	83.17	35.612	150.509	149.902	-10.05	22.824	-4.947	24.603	29.545	62.058	-207.036	21.58	112.617	118.528		13.789		9.295	34.349	33.514
165.467	25.98	-62.457	47.618	78.934	73.69	-132.326	2.562	2.304	25.752	-34.281	27.307	32.768	30.276	15.961	11.462	106.088		30.668		60.362	59.497	33.23
165.6	10.208	-43.384	15.764	27.602	86.601	95.816	7.497	61.021	15.842	-65.151	67.841	104.432	51.902	38.464	85.954	-45.367		41.307		18.535	1.42	10.361
165.733	55.575	-12.622	34.431	88.157	102.678	118.738	2.075	78.928	-6.524	-217.041	242.6	90.03	-8.222	29.633	18.539	55.852		29.854		-34.22	19.672	46.695
165.867	54.252	10.294	-35.234	-43.887	53.733	60.688	3.585	96.324	13.767	-193.826	138.335	65.89	11.81	48.741	98.281	-51.153		-40.84		17.708	-11.555	25.61
166	11.624	25.867	52.094	197.711	34.892	68.095	16.544	30.113	-24.55	-103.789	137.991	8.205	119.653	28.468	120.587	-77.644		7.09		13.782	-28.711	11.97
166.133	34.063	17.38	10.536	54.037	26.857	120.45	-13.44	41.463	-2.046	-96.598	144.612	22.591	32.087	16.864	71.098	-115.885		5.598		7.449	-29.738	-18.573
166.267	31.181	19.241	31.738	49.881	90.887	31.95	26.673	9.934	3.029	-152.457	64.209	47.868	71.05	11.393	45.336	-18.875		20.063		16.64	-23.714	8.592
166.4	99.665	24.709	65.524	30.748	74.958	13.577	-6.757	10.361	32.34	-125.39	23.025	81.022	88.162	-26.46	90.026	67.413		15.85		13.86	20.674	-12.159
166.533	77.717	-6.537	87.779	40.635	64.481	18.42	-4.438	50.096	-8.431	-24.794	63.974	68.382	-7.816	13.832	35.209	-144.893		12.018		25.652	-16.443	14.475
166.667	66.198	147.845	87.764	-86.097	40.854	73.242	-18.727	66.362	7.633	26.717	40.849	115.293	42.779	138.327	96.505	-192.566		-7.561		27.881	3.982	19.883
166.8	29.531	-100.828	100.415	57.795	18.862	-21.791	31.634	8.823	-3.833	-120.914	13.924	47.184	111.843	-104.868	82.731	-165.494		2.064		-10.791	71.107	6.737
166.933	11.799	121.189	192.078	82.249	-58.842	-5.873	-3.597	-16.388	37.745	-92.347	47.453	72.21	64.628	8.418	33.64	-296.455		-9.434		12.556	90.875	-6.405
167.067	7.886	-103.504	145.595	96.415	-9.095	-8.178	-2.998	1.589	10.122	-72.742	36.18	152.001	78.154	-101.666	58.934	-47.532		3.977		-18.583	251.785	55.013
167.2	5.06	43.423	104.357	14.799	-22.377	9.559	-16.036	3.793	32.051	-128.077	-9.713	65.898	50.061	-116.784	59.903	-217.079		-11.476		11.481	-49.197	-7.265
167.333	10.501	39.265	55.275	94.076	32.017	22.639	-2.82	20.699	3.893	-125.765	42.191	106.5	110.565	-154.714	48.159	-142.197		16.271		63.432	147.404	-11.265
167.467	4.678	38.673	91.694	60.968	15.142	24.268	1.628	6.466	24	-155.848	22.02	82.587	39.933	-177.24	19.459	87.42		-9.798		23.526	207.872	-13.334
167.6	-25.014	20.034	50.457	10.493	48.101	-9.093	-2.212	32.908	-28.698	-199.744	8.873	61.601	186.631	-279.762	92.724	14.588		15.389		8.216	-63.09	16.334
167.733	-10.753	38.679	16.975	13.111	51.191	-5.427	1.707	16.222	131.234	-310.714	61.277	37.018	26.752	-360.12	40.851	12.052		2.797		38.165	-2.605	6.175
167.867	82.592	25.843	21.959	48.553	50.561	10.773	-23.23	13.96	10.308	-30.91	31.532	60.965	53.57	-303.417	67.689	88.495		-18.773		-4.981	19.897	-2.366
168	108.97	76.217	-14.802	54.652	40.994	10.501	-24.376	1.474	-112.366	-31.055	2.393	46.312	52.41	-171.037	45.852	149.858		23.407		26.758	5.995	13.179
168.133	109.538	25.689	-29.282	57.12	120.609	-25.143	-106.08	40.379	-2.994	-139.328	22.647	77.048	-16.607	-37.407	9.027	143.767		0.959		-28.313	8.969	11.182
168.267	107.482	23.316	-21.225	81.804	34.787	-15.621	-92.378	41.659	9.948	20.765	33.364	60.848	68.919	174.765	13.391	116.016		21.529		16.827	183.158	-3.194
168.4	111.275	48.27	-14.677	108.856	75.907	2.549	-110.002	32.794	-25.141	-82.948	31.884	-5.964	-33.134	64.887	29.886	184.254		-24.376		40.688	-12.017	27.16
168.533	50.691	28.681	35.663	151.812	124.588	-23.496	-112.452	51.636	5.847	-12.509	16.571	34.791	41.223	-33.498	-16.368	154.652		-25.127		20.945	-90.594	-9.642
168.667	20.383	-20.635	83.098	145.234	79.918	-25.38	-128.681	38.358	8.329	-5.561	53.858	39.204	145.375	26.987	5.569	151.258		22.171		134.263	91.041	6.915
168.8	34.659	53.251	28.025	156.659	26.125	-14.115	-44.512	39.232	17.592	-17.607	-3.042	77.2	213.379	144.509	111.115	142.053		-5.516		45.171	-82.78	-16.171
168.933	55.9	103.804	-32.539	-1.829	48.321	-33.141	-103.813	-20.595	-11.936	59.478	-19.477	172.326	-35.109	-75.189	105.6	171.632		6.815		20.608	21.754	-99.741
169.067	24.236	23.056	15.868	197.059	20.508	-14.941	-76.735	39.871	-12.752	42.954	-20.435	109.111	201.82	14.952	75.304	105.511		-13.61		37.193	-24.636	-174.438
169.2	38.285	32.475	56.816	57.006	31.046	-21.393	-76.089	9.631	14.867	55.947	16.203	84.789	69.351	12.937	-5.104	93.288		-21.374		27.918	-6.168	-104.723
169.333	-12.623	39.625	116.747	84.511	-152.908	19.226	-259.255	39.086	18.229	160.214	-13.051	57.784	-11.737	23.443	-23.897	-18.288		56.696		21.714	-14.571	-201.176
169.467	30.394	8.843	116.008	137.057	170.452	-41.172	151.195	-19.718	-10.683	-87.724	22.562	81.478	103.829	-10.317	21.011	51.918		-36.608		-32.519	25.136	-115.355
169.6	20.459	6.624	73.473	72.565	-12.67	-28.432	-15.944	45.734	26.512	-93.148	6.195	113.423	-50.812	-14.353	12.169	151.596		-121.852		-6.057	34.511	-142.443
169.733	-1.902	9.138	71.981	18.12	-18.189	-21.822	-42.632	28.283	15.516	250.838	-16.468	-26.26	-377.347	13.699	6.302	21.891		-213.988		19.407	-44.066	-155.951
169.867	0.439	12.279	24.03	-6.267	-78.874	-23.275	-53.357	6.23	1.95	17.109	30.18	102.107	-345.866	114.129	71.343	177.263		-233.439		-3.762	31.074	-124.643
170	16.691	7.95	-3.149	15.886	-79.901	-61.375	-136.94	21.844	-20.725	2.801	20.5	127.583	-422.78	-87.269	47.42	130.279		-168.425		-9.188	8.354	-216.866
170.133	20.79	6.939	21.67	29.783	-57.064	-50.589	-37.875	26.842	29.832	-11.253	-28.7	101.755	-75.028	-17.491	29.84	68.482		-130.921		8.355	15.117	-215.299
170.267	2.471	6.326	-35.184	68.066	-9.136	-57.329	-21.454	78.625	10.638	148.531	37.422	73.335	-217.987	-133.564	58.26	109.328		-109.492		4.306	5.399	-190.524
170.4	86.812	-9.3	-31.368	96.381	-27.537	-24.952	9.711	5.236	15.604	62.935	11.854	12.911	-249.953	-282.272	74.423	150.722		-30.901		49.305	4.727	-153.725
170.533	6.917	6.306	-43.775	35.17	-35.488	-71.345	-8.068	43.546	-16.217	-19.071	-2.452	-13.239	-173.333	-294.819	30.317	169.754		-5.039		90.034	-15.188	-187.592
170.667	-61.772	0.577	26.039	44.521	-150.144	-149.959	30.091	62.842	16.86	307.026	47.253	-124.028	-137.842	-178.994	89.474	84.571		-128.316		38.504	8.772	-183.507
170.8	31.962	33.174	29.758	54.565	-82.095	85.892	33.815	34.494	21.234	-73.158	-114.393	-415.117	-134.57	-151.969	133.69	214.093		64.798		76.575	-8.223	-95.194
170.933	-26.907	43.937	86.045	66.777	-127.118	-18.409	53.079	57.467	28.638	96.876	153.025	-246.306	-258.643	-76.187	101.852	280.019		-17.32		7.632	-12.41	-57.052
171.067	-27.874	66.939	34.325	29.69	-41.585	-6.223	21.456	59.97	14.594	87.798	11.726	-68.407	-227.039	-125.522	96.962	179.45		-18.239		56.952	47.587	-22.781
171.2	-23.819	79.086	20.994	-4.895	-4.306	-20.9	28.728	16.894	-11.998	126.464	-93.383	48.438	-21.556	-162.913	95.773	66.194		17.283		18.228	121.424	116.059
171.333	-120.321	36.016	72.353	55.183	1.24	58.53	19.066	45.503	44.933	77.922	147.072	32.212	-212.944	-204.76	45.657	173.621		-13.364		-24.519	-101.98	48.378
171.467	-200.39	-22.576	37.024	-14.149	10.332	66.098	21.153	41.015	80.6	64.033	36.152	57.932	-118.484	-199.433	68.02	109.799		-5.122		20.604	-9.297	119.071
171.6	-129.043	20.65	53.452	1.928	20.439	-16.795	7.222	25.598	68.711	48.881	-14.255	108.489	-19.418	-162.165	124.451	105.388		-3.091		44.595	-21.586	126.423
171.733	-68.013	11.926	73.961	46.797	22.074	2.014	2.732	27.529	33.169	114.3	34.697	99.262	-112.528	-183.408	-1.224	53.096		32.444		54.306	35.021	97.089
171.867	-37.386	-5.544	74.205	14.31	30.093	44.997	41.671	60.543	-9.452	161.722	16.439	93.267	-62.554	-137.862	46.005	-68.237		49.514		41.413	-33.677	58.723
172	-99.392	37.946	79.619	-2.192	-154.058	-7.965	0.456	31.855	33.437	313.644	-15.876	40.391	-202.667	-127.194	76.089	-99.552		-131.956		56.899	106.769	87.443
172.133	-160.343	19.421	36.549	71.643	145.44	53.601	98.568	24.598	-6.426	-186.998	25.06	97.067	-252.918	-115.917	106.201	-34.379		96.197		28.627	24.918	40.02
172.267	-129.728	-14.669	72.579	71.621	-120.588	-0.594	38.412	47.427	-12.475	85.791	-7.956	74.01	-21.606	6.966	70.126	-45.335		-8.792		-7.489	-28.271	60.253
172.4	-144.375	31.311	101.373	88.016	-103.162	-6.447	36.068	30.724	18.003	58.413	7.41	88.24	-41.418	-234.07	118.336	31.987		13.759		22.293	-102.505	76.921
172.533	-136.331	18.731	105.93	132.354	-114.633	-18.751	27.567	31.855	4.376	67.177	-11.517	67.021	-24.354	40.629	109.701	19.005		39.318		27.921	-17.495	54.92
172.667	-44.755	21.574	52.642	37.135	-63.048	-5.007	23.71	65.045	2.275	78.02	17.888	80.923	38.684	-61.296	143.838	66.018		79.097		2.733	119.488	55.946
172.8	-49.18	28.836	42.449	47.917	-169.279	-3.672	2.686	59.842	-29.501	7.506	-13.972	78.566	74.461	-40.952	142.728	16.067		139.148		10.476	-86.52	-27.219
172.933	-40.529	9.684	68.126	40.648	6.673	14.141	8.011	18.653	20.438	30.605	9.21	96.136	101.196	-5.888	151.45	32.267		125.423		60.651	53.653	-22.774
173.067	-79.224	10.659	17.103	77.186	-5.598	18.309	5.695	19.449	-8.647	36.877	-18.276	100.648	57.659	-0.85	130.555	126.45		21.768		17.248	-1.27	26.398
173.2	-114.939	35.862	30.461	138.572	-10.561	-9.669	-7.608	2.318	1.449	10.515	3.093	84.125	31.102	-14.72	82.124	125.577		64.975		-25.268	63.717	-53.941
173.333	-26.607	12.224	49.596	37.885	157.384	51.258	128.419	-2.495	63.278	25.95	14.56	85.739	9.639	-29.323	76.978	174.077		22.682		8.781	-12.94	-205.105
173.467	-9.617	-15.361	23.583	57.624	137.244	65.122	46.948	8.309	-13.301	28.606	5.473	45.319	35.096	-11.688	103.9	-194.522		85.847		-7.752	5.198	-349.859
173.6	-18.913	33.138	58.637	58.75	80.563	-24.173	64.984	30.943	-8.291	16.18	-39.149	65.875	46.681	-45.064	98.055	-380.534		77.794		2.592	6.304	-310.992
173.733	-28.588	18.374	60.251	46.291	102.459	26.202	65.58	42.502	-8.166	-1.184	-14.528	51.525	70.907	-36.061	117.162	-323.114		71.127		20.978	18.818	-249.948
173.867	23.207	11.472	139.743	43.942	55.095	-25.535	119.619	79.288	15.216	11.649	-139.154	60.132	149.614	-59.194	107.687	-403.162		81.4		24.127	-15.944	-178.318
174	2.024	-2.99	126.114	9.212	36.19	12.581	14.635	72.502	14.144	0.256	3.896	85.139	102.149	-17.303	168.626	-292.403		89.615		-11.59	4.977	-107.652
174.133	46.293	43.845	72.54	9.798	29.054	45.489	37.385	59.45	5.548	8.074	131.976	71.541	25.78	-13.617	122.999	-266.241		68.326		-10.451	-3.942	-172.886
174.267	71.429	-13.491	52.209	32.584	57.422	35.6	36.492	60.597	-20.02	5.722	183.703	23.258	95.419	-15.654	128.589	-165.649		37.095		-10.047	-29.733	-48.514
174.4	46.303	-17.901	54.017	-22.528	121.384	-96.935	20.247	43.184	11.67	-6.106	19.924	53.103	-52.998	-88.195	134.216	-151.091		77.379		-7.293	26.781	21.558
174.533	23.538	-18.013	35.359	-15.345	57.454	177.186	172.968	84.793	-13.018	5.709	16.047	-25.556	-21.731	8.34	99.199	-220.178		38.465		-16.247	-5.388	36.236
174.667	72.465	137.636	86.882	-55.452	30.916	152.443	247.065	29.567	-21.869	12.864	12.56	-28.427	400.546	11.102	103.667	-26.195		-135.142		-6.129	-18.907	33.613
174.8	14.142	-94.329	32.449	-38.567	143.523	-45.604	-17.859	45.912	-3.83	-22.7	5.352	5.889	76.455	-22.53	98.259	-99.774		118.476		-5.278	-0.997	39.06
174.933	1.488	56.475	67.974	-42.24	32.33	87.087	27.846	67.289	-2.016	10.312	-17.614	136.955	228.14	39.079	131.66	-178.144		2.356		-10.973	13.227	52.567
175.067	35.24	69.674	36.872	-25.213	92.548	109.488	4.702	7.052	-11.708	12.552	-31.04	32.139	71.729	-586.262	94.96	-70.127		12.076		-9.17	-18.104	87.48
175.2	-26.227	70.448	9.751	22.711	57.136	64.879	24.452	-23.188	42.112	8.478	-72.266	80.197	123.69	-57.981	72.356	-107.898		43.026		-26.106	0.199	102.737
175.333	84.435	37.453	23.052	51.073	60.965	38.932	34.548	8.469	77.866	-4.6	-157.989	124.359	-27.098	-17.894	101.939	-146.25		21.591		123.112	-86.424	115.199
175.467	75.019	35.679	41.561	-5.185	12.405	79.202	89.54	18.552	-14.457	13.241	-189.558	73.306	177.783	-8.837	77.507	-107.265		70.539		7.636	31.984	60.547
175.6	71.963	38.121	74.326	-3.587	43.518	36.012	16.154	13.488	-9.847	19.298	-150.769	16.149	-17.414	22.891	105.062	-68.658		41.265		13.137	-18.797	45.014
175.733	101.508	37.56	57.468	53.551	5.651	41.256	2.625	36.027	-28.945	-6.176	-189.097	42.019	287.577	46.61	28.205	-86.879		81.953		-13.587	-59.124	77.687
175.867	24.029	44.15	46.489	93.162	-29.396	14.272	-9.927	25.911	-24.399	-9.452	-116.952	30.651	-8.074	510.329	26.126	211.457		86.081		2.694	88.451	42.686
176	97.541	-14.617	48.226	22.815	12.654	21.536	22.047	56.711	-19.538	160.925	-104.104	34.458	174.795	149.292	64.124	23.327		17.177		-4.505	-137.998	67.301
176.133	82.732	45.34	21.448	63.163	10.803	44.596	-35.469	46.095	-111.386	-162.227	-42.729	16.411	-52.572	144.931	74.254	16.759		155.571		10.331	113.246	11.16
176.267	28.19	-12.477	98.21	83.735	35.93	41.384	-51.735	19.884	-22.245	-24.905	-17.981	13.984	50.65	224.722	55.19	111.542		38.613		5.144	-20.701	30.873
176.4	55.454	-23.918	117.543	99.682	-12.999	60.223	-121.615	27.188	-31.629	-2.602	11.338	-36.401	103.305	113.442	30.962	209.037		46.279		15.903	-51.996	-20.306
176.533	37.286	16.312	-15.859	105.479	72.329	58.513	-121.279	19.727	-60.721	-20.844	-19.675	-107.583	43.426	60.702	-13.285	239.385		-9.466		9.602	-150.438	15.641
176.667	1.215	55.906	91.97	4.654	43.051	33.97	-164.007	59.457	-128.885	9.352	-12.254	-271.779	151.012	62.388	25.683	177.976		-6.32		-12.763	106.405	38.05
176.8	11.199	26.659	163.68	43.16	38.961	46.738	-132.185	18.748	-133.355	-5.396	-11.218	-227.227	110.812	128.431	88.557	245.393		45.753		43.349	-16.605	154.166
176.933	28.068	13.394	71.41	43.601	57.114	53.55	-170.525	30.75	-74.822	-27.318	3.922	-266.721	16.201	137.157	120.75	257.762		-8.297		10.383	0.644	156.201
177.067	54.554	34.909	-9.068	31.308	96.561	21.574	-127.04	30.303	-67.357	-29.08	10.946	-218.174	112.983	93.837	156.53	136.342		7.025		-7.108	-127.743	82.6
177.2	48.507	-8.288	27.376	28.49	72.556	-4.19	-86.796	24.053	-49.66	-175.052	-7.964	-163.936	57.74	89.704	106.203	115.494		5.348		2.878	-28.822	51.209
177.333	108.195	7.11	-79.721	35.834	44.064	-110.979	26.145	14.775	-61.283	-165.534	15.716	-203.152	19.976	208.173	111.45	212.449		-133.069		-27.965	36.742	74.554
177.467	83.929	11.752	159.906	-15.174	142.854	128.431	-88.154	10.614	-0.718	-318.31	10.089	-101.167	213.173	42.942	71.771	122.42		132.453		18.009	-64.817	27.83
177.6	82.069	-47.636	120.988	-32.915	95.15	6.261	-57.144	-6.29	-59.114	-201.594	36.624	-95.095	309.15	63.301	65.376	183.914		36.045		9.015	-11.29	28.787
177.733	71.398	17.784	105.022	-172.478	88.735	51.642	-58.764	8.329	-21.718	-201.781	8.582	-42.125	22.674	17.341	40.24	194.865		25.981		14.074	-72.314	60.954
177.867	46.82	16.082	127.663	-222.976	25.553	14.457	-51.059	15.992	17.89	-141.932	-9.177	-9.697	-193.908	-49.147	41.071	224.572		36.335		16.621	-38.09	110.091
178	37.833	36.586	107.986	-221.045	38.997	24.799	-47.505	-22.712	-7.386	-75.802	16.288	34.572	271.943	0.295	126.001	206.267		-27.806		-33.486	42.89	98.935
178.133	29.245	77.759	109.733	-246.431	40.582	-2.232	-102.578	31.231	-2.254	-47.925	10.843	191.283	7.464	-26.4	24.088	174.619		34.126		-26.191	25.242	126.433
178.267	38.279	86.307	62.511	-238.088	97.722	-107.116	-70.094	-9.698	6.317	-11.66	81.926	75.106	94.766	-36.962	-202.036	223.241		25.21		15.284	-44.877	97.816
178.4	15.417	186.131	86.215	-227.771	20.549	151.144	-66.969	-4.647	33.273	-14.894	77.173	101.052	40.886	-46.998	-175.787	261.727		-31.639		54.099	-20.904	85.421
178.533	-13.897	-36.724	114.087	-224.371	72.09	11.579	-59.463	-19.225	-8.187	-2.072	4.815	81.306	-81.663	-30.235	13.29	260.022		-4.632		26.3	-4.853	68.656
178.667	1.287	-12.497	55.888	-150.479	54.395	150.898	1.935	27.379	-7.377	-4.815	-9.667	91.351	248.285	28.066	10.773	225.102		-130.742		229.818	39.01	60.832
178.8	7.951	48.445	110.329	-47.11	28.348	-12.996	-86.422	-10.59	-4.247	-48.947	-28.737	118.739	95.84	29.389	86.127	196.333		129.179		-11.904	-29.559	65.327
178.933	-11.091	11.369	138.269	-63.513	68.267	21.483	-70.013	-0.847	-10.623	6.018	21.686	170.323	107.592	71.244	21.58	171.41		28.194		67.931	-14.517	38.813
179.067	58.775	6.444	87.127	-83.911	78.433	57.787	-90.666	-4.073	-8.413	8.628	143.007	177.102	107.668	32.888	38.873	141.954		1.985		103.793	-6.916	67.39
179.2	41.022	1.242	37.999	-122.656	22.824	13.645	-54.122	11.189	26.759	-92.495	38.325	50.015	88.888	6.869	25.956	124.999		3.612		47.781	-50.049	-7.909
179.333	11.945	13.218	18.64	-143.363	9.079	73.506	-18.949	-17.66	31.402	-116.72	35.279	132.802	12.759	40.025	-22.493	202.635		-91.109		31.856	-18.196	55.661
179.467	12.108	-3.534	8.103	-167.242	5.631	-19.751	-20.387	-29.888	19.466	-127.402	37.293	166.84	-24.084	75.007	-13.591	148.942		-12.725		20.626	29.402	39.71
179.6	4.218	14.494	5.477	-152.692	50.008	6.513	5.431	-44.637	7.726	-100.244	-17.104	74.419	-245.63	93.091	-29.849	148.46		80.125		17.969	52.054	49.011
179.733	4.49	3.231	5.997	-77.616	27.806	9.775	-21.763	-83.038	-28.736	-64.681	5.761	129.308	-354.501	-28.623	-218.334	97.373		-129.45		-3.232	133.004	68.404
179.867	22.555	-22.678	-31.144	-123.076	3.141	-134.131	-11.509	-116.863	-40.457	-59.291	-95.667	101.735	-320.478	218.265	-187.092	130.588		176.193		44.107	73.553	19.862
180	17.808	-30.665	-30.55	-51.275	-13.087	-18.658	-129.259	-195.51	-131.27	161.094	-123.09	75.905	-333.678	33.524	-125.861	205.198		-28.357		-32.448	-98.927	99.244
180.133	38.028	-119.848	15.212	-52.692	8.063	-31.872	192.506	-104.547	-88.01	-50.116	-177.567	24.652	-107.994	20.573	-39.921	91.753		6.906		-13.585	2.907	47.354
180.267	26.677	-194.424	-58.952	69.5	7.272	-32.512	5.326	-101.41	-137.984	-19.95	-148.706	54.089	-88.072	112.35	-46.111	6.942		358.809		6.238	21.022	7.975
180.4	23.066	-187.153	-6.443	127.525	339.405	167.734	60.436	-30.414	-36.806	25.752	-73.988	277.35	134.879	396.075	122.989	138.27		337.02		308.645	121.369	59.274
180.533	144.955	-202.269	18.923	327.408	481.698	514.201	321.6	364.429	13.64	487.941	-58.337	321.232	441.624	356.511	336.715	248.457		351.39		390.499	206.821	52.388
180.667	82.106	-155.609	307.656	297.271	362.206	328.696	264.754	365.547	292.356	437.921	-91.43	308.113	254.51	380.418	289.252	141.564		269.589		423.318	163.352	16.946
180.8	159.808	-89.062	327.742	226.122	468.43	454.601	266.406	238.598	407.536	369.185	104.091	371.819	413.38	257.953	311.242	123.089		251.69		476.899	110.042	74.038
180.933	300.732	-39.849	208.423	263.704	395.088	435.487	180.418	259.898	318.438	411.799	203.073	490.478	191.566	347.891	242.499	146.95		238.024		520.976	175.592	91.214
181.067	197.983	216.858	288.935	435.014	440.715	364.013	215.683	326.282	205.42	395.132	139.748	402.997	276.694	272.172	207.133	93.544		262.167		393.962	214.268	103.983
181.2	84.744	452.71	201.286	375.73	362.754	433.363	152.57	320.805	118.42	392.302	102.857	441.742	159.421	266.988	288.149	83.194		232.716		266.088	61.595	188.01
181.333	107.733	335.099	202.074	329.85	283.858	434.251	178.875	290.335	82.052	309.551	77.581	384.567	218.223	218.716	221.764	83.7		224.46		261.735	179.133	-8.096
181.467	71.337	234.573	205.572	243.695	217.021	357.791	138.39	148.205	36.313	27.836	119.536	259.201	582.942	-9.142	193.584	112.955		125.271		240.71	-91.976	64.705
181.6	69.74	133.469	222.994	213.953	225.504	396.886	117.567	86.567	50.178	84.649	91.135	155.638	36.676	86.309	241.115	86.105		329.608		213.488	174.017	158.712
181.733	72.282	137.63	120.261	175.705	181.672	291.214	104.468	22.725	39.824	61.981	294.529	140.656	382.1	100.296	107.906	58.664		329.8		229.961	-55.626	49.2
181.867	32.312	76.205	91.667	148.936	285.881	317.075	129.587	38.581	40.512	30.659	154.569	114.704	143.61	121.976	158.975	-44.811		305.084		276.875	116.858	-118.972
182	6.371	62.213	68.543	165.742	153.013	282.769	74.688	103.553	17.824	80.219	72.615	85.54	222.668	160.484	118.443	-30.34		271.982		151.864	-47.423	157.954
182.133	20.602	67.235	111.365	137.846	170.908	321.731	115.192	69.521	33.469	49.226	86.708	84.075	237.4	146.588	80.471	28.916		345.409		135.437	142.021	38.966
182.267	-9.964	62.522	107.784	187.72	148.67	328.563	96.166	30.923	58.716	87.546	117.6	31.393	251.837	95.989	140.532	5.865		294.585		196.045	10.494	12.831
182.4	-3.932	40.867	95.849	145.474	138.595	293.593	136.448	30.989	51.204	41.884	74.264	22.073	230.379	119.529	172.415	10.064		282.244		180.238	-66.501	-123.973
182.533	17.814	67.81	158.905	108.704	156.604	350.496	126.113	26.184	74.386	39.749	57.506	10.509	241.037	164.996	115.575	5.352		199.416		219.381	45.798	141.782
182.667	18.542	92.111	179.389	103.794	95.168	336.565	141.341	65.951	49.999	154.457	-10.727	13.414	284.14	203.721	96.384	-8.722		131.215		134.624	30.233	-103.739
182.8	33.519	64.47	80.051	105.926	197.127	388.99	164.624	49.748	42.769	-17.174	53.829	63.376	273.994	196.456	10.042	-5.246		364.314		198.745	127.318	117.695
182.933	46.086	54.632	109.464	112.4	210.193	293.255	135.715	34.036	38.11	87.352	8.487	22.657	374.556	161.154	109.617	23.075		198.307		95.548	-65.806	-89.168
183.067	33.011	18.209	104.376	115.168	161.983	311.235	95.83	23.503	47.939	149.567	-4.618	47.158	241.461	190.674	85.698	8.889		202.874		90.885	26.457	-26.754
183.2	23.413	27.955	86.937	160.212	190.02	286.42	133.811	19.239	93.154	142.561	-21.064	45.996	315.043	210.16	40.531	-9.584		158.532		178.929	48.016	123.02
183.333	20.626	22.028	35.166	142.505	184.692	293.662	29.815	-11.374	31.292	102.678	-18.864	61.096	294.828	214.425	101.306	-9.832		102.504		101.558	124.818	29.424
183.467	-23.566	4.789	41.392	126.392	155.855	305.707	16.345	-24.095	58.052	79.779	-17.979	42.592	292.074	219.532	49.103	-18.603		25.414		111.819	-50.421	7.153
183.6	41.438	5.268	28.361	135.807	141.668	127.174	14.68	-2.764	17.717	84.381	-54.823	38.973	537.766	151.594	22.843	10.939		52.689		103.637	110.088	-134.128
183.733	14.038	23.245	47.169	132.765	138.079	359.601	18.067	13.704	76.969	41.509	-50.059	32.072	427.048	99.395	85.061	113.847		-28.59		53.008	91.895	21.118
183.867	-22.228	12.682	60.091	175.046	113.146	343.756	7.623	38.717	67.384	53.991	-5.34	40.342	263.415	149.999	55.48	-116.352		25.823		27.449	33.055	60.335
184	62.965	12.125	142.791	142.699	-12.945	372.232	12.631	42.084	39.802	149.52	246.561	127.864	334.873	42.17	53.806	15.934		39.395		24.778	37.429	148.1
184.133	29.459	-8.61	171.389	200.237	100.92	339.866	184.417	48.983	33.224	-64.231	8.269	-4.75	41.258	101.713	81.337	18.557		-60.559		-18.865	66.531	21.491
184.267	89.418	42.51	129.209	130.724	41.837	429.016	380.355	40.929	26.643	5.009	16.549	138.179	455.199	126.771	66.107	-20.267		37.379		23.884	-18.944	-79.663
184.4	27.612	6.056	235.1	149.993	100.403	323.586	209.232	50.079	80.045	32.463	43.604	138.095	84.312	174.993	15.086	-29.536		19.601		-7.419	-15.539	198.031
184.533	32.66	55.362	132.666	131.405	68.077	311.339	109.253	51.163	65.681	44.955	31.878	138.138	69.664	130.45	82.734	-112.714		-12.963		11.914	15.618	44.333
184.667	67.936	22.639	77.437	121.751	55.441	253.477	54.121	35.285	39.984	6.589	27.167	-412.302	75.224	175.777	69.223	-53.198		3.412		3.258	-5.54	84.908
184.8	38.803	45.056	57.648	93.237	71.263	301.137	118.282	46.874	64.823	-9.366	5.493	-507.187	238.158	140.951	105.234	-33.397		29.916		7.573	35.564	6.183
184.933	-8.064	29.327	62.364	41.974	19.356	235.815	126.825	47.443	26.522	-5.291	10.571	-350.333	245.87	157.606	124.406	-12.685		-12.758		-3.276	28.646	-7.204
185.067	39.545	56.166	-10.996	54.549	24.002	269.856	169.727	56.916	98.139	16.911	11.85	-221.35	340.506	111.078	84.384	-29.537		6.439		-12.788	14.172	32.165
185.2	-17.525	77.316	47.622	65.871	21.465	304.949	243.014	64.275	41.134	15.767	-8.007	-78.694	203.624	109.073	59.778	94.361		-4.329		-4.915	31.857	-150.763
185.333	19.293	75.156	90.407	83.105	-9.527	263.676	236.627	46.84	32.355	17.771	-29.048	18.047	223.718	78.943	125.622	-86.415		-131.753		-13.797	-11.778	-20.752
185.467	14.714	63.048	85.165	89.637	11.735	331.437	131.821	28.023	63.151	-19.733	44.31	-30.099	183.277	73.848	48.067	-12.031		91.342		-21.05	10.872	3.247
185.6	-17.184	41.885	57.669	76.411	-31.491	238.943	129.542	21.137	40.57	-9.621	5.403	-6.478	179.928	92.316	132.468	19.594		-4.938		-34.134	-137.663	13.658
185.733	-41.162	23.452	109.663	84.414	65.647	246.387	143.433	26.157	58.63	-20.158	11.023	6.592	236.387	171.893	157.299	-19.521		4.998		-31.378	158.693	45.804
185.867	-0.326	30.114	147.058	87.462	71.877	221.455	134.393	11.859	11.61	-19.669	4.617	44.35	321.91	120.315	69.143	-16.885		14.721		-20.397	-82.06	53.549
186	-13.241	10.011	97.22	67.751	227.181	201.099	173.38	21.536	15.698	-22.414	6.49	10.414	-30.736	111.018	82.873	27.723		-9.73		-3.304	127.289	68.236
186.133	21.487	79.404	151.684	79.423	74.558	193.057	269.176	-20.993	-13.166	-41.844	-14.876	-11.405	431.757	110.58	90.416	-5.742		27.68		-26.691	-20.829	45.161
186.267	-12.834	44.547	247.574	88.272	53.77	70.054	168.959	14.754	-4.171	-22.099	6.302	11.892	176.332	114.956	61.786	5.406		-8.011		32.119	-77.484	50.24
186.4	31.954	51.536	69.266	95.913	11.325	170.929	119.85	10.042	-3.426	-32.665	16.018	61.401	287.983	99.418	122.12	-10.78		11.858		-40.915	71.889	43.627
186.533	7.738	46.579	104.952	76.232	193.827	149.603	69.286	4.19	26.507	-5.681	-8.965	105.091	343.861	168.834	88.035	16.546		15.905		13.568	-23.662	133.442
186.667	-11.292	22.178	57.721	107.203	18.679	247.912	138.142	33.768	-16.969	151.68	-10.153	166.386	168.101	142.474	154.25	5.688		29.316		-18.682	-75.337	11.3
186.8	1.251	49.248	-6.501	47.226	193.487	94.52	132.49	39.717	41.039	-155.751	-23.286	160.59	224.023	124.874	129.722	1.485		43.184		-5.559	12.409	32.569
186.933	16.912	20.527	-5.896	22.641	33.751	135.788	140.191	32.461	7.015	-23.095	-4.807	114.402	343.8	89.802	67.58	-22.041		10.305		43.49	35.185	-9.234
187.067	-25.473	40.294	-10.723	55.108	-52.053	75.758	31.038	-3.452	11.824	-24.896	14.741	103.799	336.944	100.567	75.986	14.022		5.392		-8.41	-22.597	-138.26
187.2	50.423	11.842	51.225	85.503	44.416	177.618	129.714	-4.322	-14.281	-44.416	-157.913	85	240.211	88.416	50.958	7.575		19.83		-10.311	-9.899	-21.525
187.333	3.05	23.98	53.351	35.893	54.631	195.806	131.35	-5.071	-10.234	-6.704	8.178	41.395	266.144	132.393	112.441	-8.393		-21.105		8.652	90.793	-52.467
187.467	29.239	52.202	48.343	52.974	89.12	201.944	-131.461	35.756	-20.095	-17.981	9.259	54.69	261.599	148.234	106.048	26.418		-5.852		-10.614	5.702	-89.795
187.6	4.418	29.076	41.266	48.57	29.822	267.598	130.248	41.119	25.831	-23.785	160.119	-2.99	294.456	147.309	67.546	21.364		29.335		-140.568	-14.178	-149.47
187.733	-33.466	61.027	33.358	47.466	101.102	141.455	131.114	43.644	-1.129	13.766	-157.12	5.911	238.975	142.871	94.466	-2.953		-22.362		-143.523	11.296	-171.327
187.867	20.853	48.015	79.385	98.43	114.185	156.055	130.018	42.827	14.935	-5.253	-3.643	9.987	225.006	132.552	60.457	98.594		-13.755		-117.091	-58.997	9.256
188	66.364	142.897	109.247	81.918	121.816	153.897	129.655	82.219	-6.236	37.654	15.807	-17.381	203.491	143.344	54.7	11.305		-134.26		-156.005	100.751	-140.361
188.133	51.347	33.3	106.527	70.653	101.383	90.857	6.79	55.071	37.542	-44.034	159.48	-8.836	182.527	118.477	86.729	-3.948		144.026		-199.574	-39.048	-117.917
188.267	26.534	55.458	145.472	137.745	123.416	133.988	259.234	36.718	22.159	-14.369	-3.955	49.394	-36.035	106.835	88.721	28.819		20.814		-187.448	-65.378	-118.803
188.4	16.155	125	58.663	189.104	51.034	93.532	129.457	39.42	71.448	-15.333	-161.899	55.124	157.559	125.742	61.043	-14.122		-19.494		-100.806	38.253	-246.969
188.533	5.363	-21.36	81.213	80.104	49.812	146.111	129.521	26.46	19.929	-24.55	-25.38	-24.031	3.136	123.976	80.229	-112.448		16.014		-109.707	-15.148	-17.871
188.667	36.713	23.105	153.871	68.067	27.141	164.919	55.391	45.497	33.226	25.504	-498.406	-56.911	132.62	84.008	76.277	45.724		21.067		-31.327	38.717	-62.7
188.8	6.225	48.602	107.628	69.504	32.149	156.588	135.561	-8.087	-19.381	-2.966	-470.165	-91.504	65.936	78.907	138.188	-23.316		1.607		-62.872	-38.188	-18.464
188.933	6.964	27.805	184.823	77.86	4.413	140.022	52.404	19.019	13.424	-18.364	-430.027	-30.104	37.888	84.123	84.503	-15.133		19.224		-15.946	6.273	-52.979
189.067	27.946	15.753	104.239	47.694	19.523	31.001	70.147	27.382	22.531	-48.752	-342.382	19.696	117.589	138.84	25.941	9.758		15.248		3.209	15.196	37.345
189.2	70.609	36.77	90.337	56.771	22.725	88.556	68.602	-1.881	21.606	-39.367	-313.174	194.433	2.299	113.361	6.68	-5.102		-14.24		-24.048	47.627	27.087
189.333	129.179	47.211	60.654	46.35	-2.441	115.672	2.908	3.148	31.554	-6.524	-165.375	124.667	129.03	145.042	50.943	8.337		41.584		17.453	-17.494	-40.303
189.467	32.64	60.509	22.804	68.544	23.419	112.608	220.037	-3.901	18.872	-37.78	-135.09	131.297	151.098	186.948	54.524	25.93		-7.661		74.752	-29.291	140.475
189.6	120.277	51.976	21.404	104.469	79.893	105.475	26.066	8.701	43.02	18.546	-63.204	104.029	232.464	95.99	57.528	-44.106		-2.127		17.439	63.199	-127.086
189.733	-151.972	68.39	-13.879	77.809	26.618	115.656	41.908	-5.7	19.865	-32.338	-35.306	-65.277	216.365	116.505	66.346	-23.869		-13.281		26.656	17.868	4.688
189.867	-15.804	23.431	13.267	86.253	15.26	289.434	23.094	43.521	-10.243	-42.691	-57.683	-15.931	165.794	71.183	133.098	-3.139		15.388		-52.67	15.906	117.376
190	92.846	63.37	-11.773	106.054	44.255	74.235	72.672	30.009	-23.691	-20.328	-79.268	25.959	256.726	133.276	24.208	-61.742		8.365		16.207	63.563	-46.873
190.133	106.9	51.921	42.673	92.702	-12.95	50.487	37.322	52.99	9.566	-13.361	-22.591	102.592		90.843	78.382	1.426		9.132		-6.771	14.789	-153.197
190.267	-10.694	58.775	175.717	66.307	43.247	82.975	-74.857	-146.809	12.294	6.473	6.951	47.061		70.566	44.157	92.421		108.218		-22.075	-19.586	-14.615
190.4	76.489	29.151	68.678	54.132	-8.428	50.217	23.337	142.683	23.005	-27.104	-27.927	78.89		124.509	77.798	-3.452		41.886		76.473	-8.706	-22.455
190.533	62.098	66.506	75.783	82.773	12.828	54.346	45.232	142.713	-17.688	48.24	-29.776	83.416		119.973	66.939	-4.614		83.961		70.18	-80.391	21.908
190.667	171.599	57.258	42.22	68.81	35.541	154.137	129.618	-142.726	11.878	151.049	-31.154	-8.316		162.792	64.761	-5.881		54.975		119.018	-28.404	-26.314
190.8	-102.856	78.309	67.437	49.674	22.05	39.238	-95.249	142.731	24.925	-89.334	19.441	26.973		148.843	61.635	-11.83		-33.413		106.731	30.724	18.497
190.933	-10.059	51.08	64.891	16.722	42.066	21.258	30.974	6.194	28.385	71.267	-16.979	105.771		99.64	103.45	13.06		55.579		59.526	-17.441	-72.893
191.067	-180.294	164.006	30.388	83.759	34.593	89.609	-10.984	-2.595	-6.417	60.404	-20.597	127.543		133.625	76.583	2.119		12.699		111.043	7.682	-258.671
191.2	-171.071	81.302	-7.13	85.308	75.435	20.124	22.126	-2.401	14.346	30.922	-21.471	112.989		161.778	109.168	30.479		12.702		78.966	68.566	-108.249
191.333	-85.642	86.773	6.04	54.277	22.487	38.844	14.404	-0.067	-7.333	44.287	-21.084	138.704		117.951	75.448	-10.506		21.978		218.077	31.429	-157.86
191.467	-94.246	14.53	-77.401	121.868	56.686	115.83	10.759	142.542	29.608	81.615	12.49	-1.032		132.353	47.036	19.579		-18.123		129.86	7.552	-128.977
191.6	-49.431	52.211	-246.562	-10.673	55.698	125.51	176.116	-7.022	6.421	3.654	22.048	138.544		132.29	83.282	-97.311		44.026		72.891	18.362	-56.281
191.733	-37.933	19.078	-286.01	38.505	71.733	68.367	36.388	-1.161	-5.92	96.251	52.201	139.373		94.512	165.342	-6.851		-15.543		120.757	-12.799	56.161
191.867	-92.092	51.436	-273.768	49.765	96.046	31.264	25.65	285.027	32.673	197.778	95.449	-20.939		91.019	45.853	111.373		25.877		124.918	10.655	-26.386
192	-178.427	69.565	-261.921	156.512	152.788	47.169	-131.26	-3.731	-2.109	154.141	58.815	141.905		98.941	47.575	9.469		-5.748		93.354	-14.329	11.816
192.133	-111.482	31.413	-110.69	153.072	66.818	35.423	33.855	11.033	50.984	36.235	28.246	-10.063		183.571	9.942	-111.725		-10.538		62.427	-4.745	77.532
192.267	-97.089	134.201	-81.903	15.896	106.382	43.338	19.257	143.57	36.36	66.908	52.198	-2.747		60.237	65.568	91.607		12.322		163.882	19.389	18.896
192.4	-46.912	34.992	-44.974	61.134	68.089	51.242	33.09	2.583	53.444	22.04	24.226	-19.871		-25.622	114.646	-28.632		14.084		125.901	-20.754	17.598
192.533	-39.797	47.755	38.842	80.263	131.831	3.99	20.419	4.546	19.975	9.077	40.655	-139.505		119.532	88.347	-93.089		8.219		67.125	10.923	21.863
192.667	-67.643	94.446	-3.919	34.722	72.301	51.211	151.09	4.173	42.8	44.245	15.617	-2.402		67.872	114.072	-26.204		-7.234		17.328	-10.963	-9.211
192.8	-84.202	70.679	32.495	35.259	74.575	-11.191	-80.787	-1.582	3.627	43.012	62.024	138.651		84.561	121.059	-3.229		-20.729		29.959	16.715	11.078
192.933	-90.845	105.07	-23.814	59.946	58.105	32.212	130.782	-6.438	37.461	9.401	-64.384	-8.135		190.247	42.849	-30.356		-17.161		46.037	22.32	31.503
193.067	-77.154	50.59	17.328	81.994	68.666	101.947	48.303	-1.352	11.378	21.203	-66.948	16.369		200.884	192.023	-8.175		-19.028		71.341	10.053	-3.277
193.2	-56.21	62.747	-26.662	61.753	56.377	148.326	-49.254	-0.174	29.696	1.52	-11.274	-13.899		120.95	116.126	-29.756		18.961		20.426	-19.938	15.221
193.333	-34.934	35.672	38.399	71.786	41.264	27.636	10.971	145.372	-16.613	154.965	28.642	-10.167		216.238	96.157	83.966		19.457		59.256	32.436	-116.875
193.467	-20.233	15.78	68.03	119.485	12.091	162.327	103.008	-146.966	549.788	-159.239	60.39	-138.312		148.663	117.527	17.756		-37.456		18.139	-24.751	-6.142
193.6	24.463	40.642	81.584	108.674	17.45	320.568	154.169	-6.112	61.601	46.356	7.722	-5.236		183.065	89.315	-3.413		-32.087		-8.175	-11.465	-20.167
193.733	7.423	-10.252	94.763	114.542	27.731	-9.785	-131.295	143.317	74.468	87.206	-18.773	10.068		128.605	90.844	-13.876		-10.321		66.734	-8.234	112.328
193.867	-12.521	11.091	157.993	91.198	47.245	198.933	15.261	-5.235	82.102	5.556	8.672	-139.062		109.416	98.611	-47.315		9.136		-42.568	-15.113	-56.143
194	-15.132	33.309	233.665	170.878	45.493	164.222	133.528	-15.04	89.895	53.545	155.091	10.556		203.858	106.646	11.859		32.909		20.407	-41.719	24.629
194.133	-17.868	5.583	99.135	82.571	40.125	197.706	132.819	142.811	39.145	5.648	6.108	138.52		108.738	127.295	14.413		39.928		54.089	51.683	19.928
194.267	-23.381	-5.953	88.326	61.239	99.064	167.44	261.858	-144.974	44.842	-35.741	-307.833	-606.525		130.105	122.673	3.924		43.283		-18.359	-4.752	53.605
194.4	30.536	41.874	53.994	-8.47	63.56	266.523	129.779	143.421	44.194	25.595	-309.7	-261.829		112.306	104.598	37.044		62.754		63.827	35.331	80.532
194.533	-22.971	7.616	70.067	127.974	73.199	156.225	-114.672	-8.696	58.093	125.493	-186.937	-117.411		169.181	77.912	-3.599		154.372		44.812	-25.452	-9.981
194.667	54.536	14.871	108.508	91.639	59.722	140.279	-12.119	-17.078	59.119	158.451	-48.043	-171.756		139.39	103.534	23.764		72.845		31.086	34.66	23.623
194.8	7.405	13.789	125.365	123.233	34.891	128.042	92.809	-7.636	91.854	-86.429	16.597	-197.315		117.434	125.17	27.375		66.655		78.513	31.999	-19.356
194.933	23.251	15.423	128.814	79.181	94.249	153.993	68.465	-6.22	81.885	17.381	70.542	-281.628		105.176	133.298	89.256		67.357		9.758	10.446	-3.572
195.067	47.378	10.791	129.884	45.826	66.321	157.955	64.808	-144.599	51.511	61.303	144.574	-273.841		85.693	66.567	-46.785		241.07		98.033	17.818	21.989
195.2	31.142	15.361	151.708	93.313	37.481	174.473	131.169	142.677	44.873	76.572	7.18	-244.925		75.749	66.331	-183.615		211.181		163.658	-2.799	-4.559
195.333	24.501	14.968	133.192	56.578	13.836	49.217	2.599	-1.508	-19.591	128.77	154.755	-218.216		113.632	67.59	-97.352		120.236		106.018	-6.399	5.216
195.467	15.095	2.965	89.901	163.818	73.196	219.251	129.075	-6.613	-415.344	214.809	20.012	-193.257		125.494	100.202	-55.25		153.98		99.981	17.75	-37.915
195.6	30.054	69.05	148.066	486.912	47.725	65.88	-12.319	13.89	-491.931	61.922	154.273	-120.155		176.275	86.012	-67.991		439.765		72.471	-16.737	63.592
195.733	11.648	57.242	120.039	-8.755	122.359	24.828	134.207	143.797	-202.651	57.837	-154.975	-124.052		130.745	108.768	-49.934		125.116		96.606	-12.972	84.03
195.867	2.225	50.164	145.814	161.892	62.204	18.547	258.561	6.365	-64.481	75.215	154.629	-66.589		94.968	90.136	-8.371		114.102		73.45	12.082	90.462
196	5.393	3.657	225.018	161.926	101.167	-21.741	129.529	6.742	-133.951	158.968	29.286	-61.239		273.373	86.313	-22.441		61.702		32.794	-25.451	33.715
196.133	35.327	110.351	72.708	-162.113	99.243	8.008	5.837	143.084	-325.848	-145.477	-454.679	21.451		47.591	81.913	52.606		76.107		26.12	36.313	40.314
196.267	10.482	158.141	135.58	-4.235	45.68	14.422	9.712	6.784	-1.999	21.161	-151.614	46.446		126.546	79.236	84.885		91.726		58.877	-3.826	12.011
196.4	36.475	-46.224	-46.656	-13.943	20.564	-4.996	129.25	143.33	-12.022	-13.701	-308.822	71.675		38.871	77.182	-11.923		62.201		94.005	14.104	38.222
196.533	53.103	33.482	169.784	-2.69	24.754	-18.129	129.482	-7.122	15.102	-3.228	-6.897	70.324		113.107	88.874	-21.3		41.367		88.68	6.733	87.231
196.667	-14.485	34.004	-42.934	162.427	218.108	6.715	-29.817	-11.605	53.392	-33.893	-7.68	58.954		108.904	67.573	9.526		38.502		162.241	-7.304	-88.272
196.8	78.848	129.183	177.792	-165.196	23.901	178.805	-17.286	-8.722	148.096	77.2	-155.05	114.397		129.335	104.189	6.022		34.222		99.552	25.344	93.096
196.933	12.865	103.471	105.137	-853.562	131.482	240.472	-139.274	-10.015	352.503	130.047	-5.363	-13.046		147.61	64.122	-4.179		51.34		60.079	-19.775	66.529
197.067	28.323	140.318	64.372	-159.166	133.308	186.767	-501.413	-25.857	63.071	38.294	84.09	92.713		-29.872	107.537	21.552		18.468		62.225	-27.001	-47.108
197.2	46.168	49.877	106.878	55.995	131.433	119.67	-268.807	-11.874	118.601	6.058	14.669	76.615		-176.857	72.314	-4.324		12.136		44.366	42.983	37.385
197.333	6.503	2.077	123.543	157.787	101.765	110.963	-201.665	142.969	165.559	15.483	-151.984	65.432		-107.731	71.169	-3.716		-54.44		23.976	-8.489	-18.308
197.467	36.867	109.657	139.84	565.304	65.71	105.763	-112.107	-7.478	80.986	122.717	149.817	-32.943		-24.973	6.132	1.228		36.304		22.404	6.126	119.836
197.6	8.225	43.683	212.231	7.418	100.631	101.255	-135.369	-2.994	75.831	68.8	22.41	18.339		-18.372	99.761	30.24		4.214		31.338	6.341	-8.409
197.733	38.127	50.661	122.697	1.306	108.521	68.741	-89.423	8.576	88.268	109.241	7.947	-6.625		11.396	123.006	24.021		27.202		18.965	-3.217	1.677
197.867	9.695	79.053	148.721	-158.45	114.672	86.05	-14.385	-3.596	65.283	174.34	10.354	-30.792		-5.29	72.268	19.401		52.541		56.421	-38.567	19.549
198	10.02	78.333	178.486	10.587	43.176	112.974	34.509	143.622	66.744	96.311	19.606	-17.875		4.591	127.471	3.864		54.663		120.528	54.68	10.282
198.133	73.361	114.413	79.185	7.771	91.761	51.315	105.076	-6.954	77.988	185.006	-4.837	-13.644		-5.831	85.116	8.054		57.671		151.845	1.05	6.319
198.267	39.304	79.656	101.478	-159.616	75.345	102.522	144.768	142.807	45.616	96.261	16.145	-98.124		23.747	73.645	-73.408		51.355		100.215	12.601	30.421
198.4	139.263	56.609	92.645	-321.912	24.825	113.075	100.002	-2.457	71.56	60.272	-18.872	-22.739		18.076	97.26	-7.401		209.403		131.379	70.547	54.509
198.533	49.025	36.833	84.787	-324.973	90.94	38.507	61.48	143.005	36.996	11.016	13.348	7.009		-10.457	74.088	8.115		69.969		54.028	37.56	-82.27
198.667	28.149	69.086	62.404	-278.396	124.588	51.144	78.411	-0.858	42.142	33.711	-159.852	-13.258		9.579	57.433	120.141		87.878		60.054	36.755	23.607
198.8	54.018	30.656	16.436	-256.721	63.513	41.572	114.313	-6.974	58.848	-146.191	200.489	-1.163		2.313	41.663	-92.149		-51.966		49.914	-3.61	21.195
198.933	43.597	21.13	144.32	-136.089	60.96	70.404	113.455	142.721	57.808	-43.43	-13.283	7.784		-3.827	67.005	-48.838		1.262		58.084	-21.557	55.762
199.067	39.105	13.513	111.163	-30.591	64.818	62.531	114.823	-6.828	54.23	140.068	19.37	24.033		1.259	-86.23	44.879		1.563		48.552	-10.438	101.146
199.2	44.938	25.353	90.704		49.778	37.821	128.037	142.727	71.502	24.38	31.039	-13.205		6.942	108.271	-136.407		194.826		53.1	-5.296	-16.001
199.333	24.499	8.503	99.47		51.274	50.152	103.625	-0.146	48.914	67.748	45.835	30.887		11.373	44.379	-46.417		12.35		88.723	31.815	-32.887
199.467	45.365	-10.968	29.742		55.416	50.405	128.657	142.78	46.031	-1.739	41.529	25.83		-10.776	92.743	-101.777		-89.808		62.147	20.595	-62.289
199.6	21.765	-8.2	11.729		78.225	90.014	88.833	1.037	31.137	40.401	7.598	-7.93		-1.874	73.581	-129.737		168.308		79.478	-12.34	76.729
199.733	78.819	5.97	5.361		-33.99	306.892	83.401	142.79	48.753	-4.668	46.137	-9.414		1.459	164.038	-76.914		-83.162		49.037	-18.689	45.024
199.867	17.626	22.259	-35.635		50.965	74.24	131.043	-2.72	123.128	14.082	47.715	-210.299		11.394	97.758	-82.63		55.189		26.834	-2.691	77.948
200	74.389	-10.222	-46.812		95.744	266.787	127.572	-142.664	103.084	-6.469	-0.661	-84.751		12.996	38.339	18.525		138.518		32.47	43.244	-14.201
200.133	11.088	8.093	38.951		83.779	-24.554	-31.287	285.858	130.949	-91.807	-163.221	61.08		-10.239	49.65	15.951		-57.31		4.022	-26.462	97.027
200.267	26.566	7.226	11.97		74.638	48.738	130.95	-9.712	66.709	59.003	157.296	-5.675		-35.619	39.287	4.568		21.324		-4.83	24.668	15.705
200.4	22.417	6.617	39.017		56.879	222.516	126.822	2.875	65.182	63.864	-157.285	77.055		48.972	55.072	-5.399		43.978		46.036	63.813	16.62
200.533	-13.202	-9.533	46.83		157.035	-110.637	160.649	144.461	21.57	34.381	285.194	30.167		74.497	19.689	-8.334		100.931		34.226	67.391	-91.056
200.667	21.137	-14.264	93.184		138.552	73.117	135.162	142.757	34.993	-41.599	20.974	39.115		60.16	38.042	-11.165		43.261		36.005	5.985	-39.861
200.8	28.01	-23.839	127.478		102.483	93.324	-64.113	-144.352	30.821	-40.289	-14.543	44.328		102.568	71.27	-3.812		36.504		53.966	10.145	94.813
200.933	70.417	-11.743	148.651		167.346	38.975	-20.486	142.951	2.551	-140.143	-157.231	58.829		51.964	48.21	-6.612		-17.879		84.96	18.537	-26.854
201.067	60.214	34.386	161.665		129.815	76.719	-128.246	-9.018	34.524	-125.655	2.718	88.901		120.55	60.953	-9.682		54.006		-5.947	31.128	-136.012
201.2	40.889	-25.419	80.512		148.599	13.939	128.533	142.742	-18.3	-81.973	155.53	100.089		163.853	78.94	21.017		62.353		75.476	23.078	-40.323
201.333	-10.385	27.608	61.883		119.617	106.803	10.345	611.013	-132.603	-186.568	-3.892	54.228		147.974	52.381	-19.175		-133.302		125.511	17.78	-61.028
201.467	25.198	27.3	63.284		88.397	16.746	17.522	47.247	141.81	-128.921	155.139	121.159		179.928	39.63	-10.474		261.827		165.073	11.263	-152.078
201.6	5.649	9.946	41.441		94.637	47.417	-19.011	32.983	3.452	-28.013	-157.288	66.197		132.221	43.424	35.818		39.855		122.45	-13.08	-144.733
201.733	-14.273	78.534	19.998		79.511	78.553	12.818	28.363	6.508	-1.391	157.187	119.793		275.772	43.763	-43.67		45.022		77.382	14.73	-24.307
201.867	23.55	133.319	-15.976		93.219	99.158	26.128	35.801	10.072	-11.755	-8.713	36.909		162.889	34.706	5.415		52.696		89.089	-27.555	-231.449
202	-6.68	102.712	35.97		116.433	116.437	36.924	57.796	-11.679	-13.879	-1.694	9.856		182.701	45.861	-5.176		47.626		53.869	53.649	-54.3
202.133	3.157	39.34	21.848		98.698	165.151	-6.229	85.304	-9.18	13.239	20.294	128.818		194.783	40.881	3.318		18.479		86.694	12.812	-211.906
202.267	-1.374	57.549	30.428		85.763	79.779	128.699	69.35	9.194	10.701	155.462	34.394		177.769	11.171	4.586		15.174		174.109	29.219	-243.249
202.4	20.554	53.048	55.059		150.108	213.497	31.804	75.755	-0.716	10.452	-20.216	0.822		223.544	35.495	-10.859		57.796		113.999	141.363	-7.456
202.533	-30.358	56.994	145.971		129.436	-58.175	-131.022	16.451	-29.363	-8.954	-3.24	14.12		145.648	32.206	11.534		-9.222		73.433	-7.986	-250.623
202.667	2.41	79.096	115.509		87.201	55.108	-3.226	71.728	14.317	12.749	-8.362	-6.528		176.99	51.496	-4.158		-18.329		92.169	-8.15	-136.858
202.8	25.156	68.542	127.495		120.087	-11.563	17.078	37.45	26.634	-31.051	-157.235	-36.701		173.038	97.209	36.315		41.855		64.413	-85.334	-92.5
202.933	-8.621	48.649	48.114		132.39	179.787	-28.071	46.99	-29.158	-17.09	156.241	-11.916		226.219	78.682	-2.949		13.143		83.834	-5.586	-55.551
203.067	23.093	58.641	67.369		90.758	37.389	-132.763	49.495	-18.363	19.251	-156.26	21.986		281.438	56.314	-32.511		57.682		34.113	2.38	-4.436
203.2	-9.818	10.54	63.814		80.229	142.882	-132.242	79.421	-10.862	8.722	-2.197	83.592		259.318	86.95	-32.944		41.154		61.522	8.49	-13.233
203.333	-9.476	53.73	133.432		112.496	218.677	-262.302	58.175	-7.328	-37.442	-10.588	110.113		290.927	107.648	-48.471		21.83		107.656	107.451	-23.563
203.467	3.885	46.462	59.065		43.176	123.807	-131.82	34.916	-50.305	47.585	155.766	32.917		285.583	50.623	-75.224		11.995		67.745	-125.005	-15.218
203.6	-12.088	27.452	60.765		-25.726	138.534	-129.36	41.536	3.565	-17.091	311.102	14.882		266.224	107.139	-43.845		31.426		121.579	111.796	-84.069
203.733	15.989	24.081	40.28		75.512	91.19	-261.551	48.359	9.301	-26.601	-1.706	17.999		293.304	65.83	-63.414		13.752		44.896	-91.736	-82.875
203.867	11.728	20.367	18.506		60.984	74.946	-257.429	73.289	-14.863	-12.161	-10.169	17.759		271.257	86.186	-20.437		18.635		67.098	-6.931	-86.916
204	16.626	41.781	9.543		237.213	54.312	-14.843	44.119	-130.567	87.932	-16.043	36.352		297.683	159.703	9.699		-5.452		24.713	4.329	-76.325
204.133	22.494	32.485	81.041		83.906	24.557	-129.361	43.263	88.434	-92.513	154.817	3.401		214.898	65.782	-1.963		-69.486		-23.213	-31.75	-144.483
204.267	-14.032	8.722	113.881		135.498	20.563	-259.536	49.372	2.365	-177.602	154.927	24.543		197.199	123.386	-38.123		1.804		40.226	31.3	-43.967
204.4	-8.692	14.507	129.957		150.057	-4.711	31.037	39.559	16.17	-161.591	-2.739	30.733		124.47	138.114	14.355		144.746		102.166	7.434	-20.392
204.533	-8.007	-2.81	92.505		173.62	-3.603	-257.233	31.374	-28.003	-128.526	155.445	50.709		125.305	167.722	13.575		-5.299		137.459	17.941	-27.167
204.667	18.365	13.532	93.434		100.939	23.811	31.838	19.784	25.008	-110.58	3.41	21.815		88.326	90.64	33.235		-28.94		60.327	-10.08	43.828
204.8	-35.697	-10.27	54.235		126.47	13.697	-7.523	28.122	-15.024	-112.435	154.921	-21.466		101.995	111.115	51.374		10.497		71.342	-10.634	31.419
204.933	-14.744	10.562	159.804		77.557	-24.034	-258.376	83.855	5.855	-145.406	3.911	5.571		60.875	100.812	53.615		24.807		81.96	-27.392	36.025
205.067	-23.975	-5.385	133.719		131.312	-4.688	5.011	42.073	-13.447	-212.205	-5.839	18.782		131.446	51.932	-7.776		5.249		131.115	46.045	90.586
205.2	-87.187	4.749	153.852		100.697	-8.487	-14.232	35.746	2.567	-179.218	3.284	88.096		105.73	125.252	40.826		-0.748		108.378	10.331	32.121
205.333	-11.302	5.315	115.208		-153.445	-42.031	-15.369	46.954	19.757	-154.053	154.96	24.7		145.7	101.972	44.58		-140.702		73.788	21.366	45.15
205.467	-24.862	0.094	97.132		310.371	5.652	-131.674	19.586	-18.631	44.865	-1.029	23.067		117.739	118.098	-12.183		144.356		172.78	14.535	105.554
205.6	-55.597	432.554	111.172		122.559	-9.643	-5.253	38.925	9.732	-34.167	154.962	53.267		119.671	92.757	7.018		7.697		157.738	-4.662	73.033
205.733	-23.52	39.542	93.446		120.773	59.86	-6.691	-7.094	7.197	-33.702	7.46	67.72		114.674	137.475	-55.657		-23.071		108.619	-14.782	82.406
205.867	-14.936	52.604	22.627		120.498	176.965	-129.407	35.74	20.328	-12.968	154.947	120.605		137.553	229.125	-7.772		-7.52		175.828	7.357	120.267
206	-24.354	24.813	7.297		88.539	-9.323	129.153	35.63	15.391	-36.923	-154.727	23.713		129.92	140.48	9.517		43.155		119.882	-119.252	65.262
206.133	2.509	17.34	-3.054		139.931	78.369	128.843	-8.71	49.746	7.518	-0.663	142.587		196.512	193.814	-3.526		-0.299		129.75	-179.58	43.992
206.267	4.827	15.898	-12.233		19.731	8.185	20.276	10.529	64.567	-6.659	5.328	284.524		195.416	145.611	-27.408		-21.179		125.19	-148.108	29.97
206.4	-20.554	9.254	104.228		212.471	-573.997	2.526	-3.782	13.312	-24.289	155.265	-20.515		186.826	126.433	-7.66		-100.427		179.806	-17.165	25.75
206.533	-9.599	12.286	119.712		-46.547	-605.557	130.595	30.63	70.99	8.816	3.111	283.492		230.514	126.037	-7.564		-3.914		204.286	-82.587	103.518
206.667	13.134	14.08	46.399		86.138	-448.36	-23.392	27.113	62.162	17.901	-154.957	-142.402		388.845	110.149	10.982		-7.536		138.327	-30.464	79.87
206.8	-50.389	7.546	122.853		48.671	-428.551	-1.678	-1.741	163.776	-28.681	-8.459	143.116		268.931	110.094	-4.791		171.55		195.511	51.48	69.679
206.933	-37.173	-26.385	80.643		19.079	-455.249	-0.269	-8.6	-10.296	18.588	3.691	-424.628		297.499	130.968	-3.872		31.143		132.761	-37.396	102.793
207.067	-107.372	-7.543	287.019		34.938	-295.345	-3.651	3.838	69.814	34.751	154.867	-295.849		250.648	103.92	18.559		34.343		113.899	14.709	96.991
207.2	-143.333	4.354	70.37		18.284	-282.878	-1.035	-13.781	44.438	-11.523	-2.982	-54.96		240.863	158.748	4.843		38.726		92.774	-10.614	43.654
207.333	-67.64	13.122	120.653		5.986	-221.933	127.968	-4.252	4.209	56.314	-4.268	9.732		254.753	127.625	3.196		1.053		115.072	-13.505	40.294
207.467	-50.822	8.22	73.714		15.265	-98.267	-128.435	-19.216	40.986	94.579	-155.694	85.124		276.689	168.508	3.458		7.533		77.774	-7.438	6.745
207.6	-58.583	-12.229	8.957		-27.136	-60.081	-136.327	-24.111	21.157	33.28	-8.461	141.301		191.11	126.833	10.966		-0.871		78.526	-19.046	8.717
207.733	-57.589	7.144	65.831		70	-61.283	7.517	-8.538	41.943	122.049	-155.16	4.137		165.876	120.85	5.182		20.323		111.605	13.896	28.09
207.867	-93.321	1.464	134.138		-173.164	-13.753		-0.514	40.553	100.66		140.929		139.872	5.005	9.919		-4.159		91.537	2.752	36.358
208	-115.464	-5.786	177.558		62.366	-6.614		21.463	8.625	157.447		141.292		152.134	92.793	-17.865		-127.771		101.511	-12.55	68.595
208.133	-102.843	2.512	248.266		-156.413	7.853		-2.333	135.772	-43.827		-140.482		109.206	106.79	7.781		125.75		114.19	12.912	107.614
208.267	-24.647	-51.897	76.526		-33.718	-20.065		-12.771	50.846	16.122		-367.182		170.195	148.964	-28.142		-2.38		98.13	-64.29	70.25
208.4	-51.537	-497.178	-53.025		-14.182	-2.504		-8.56	19.372	53.914		-186.6		149.916	99.148	-22.384		-7.893		70.722	29.143	69.927
208.533	-18.399	-138.802	59.624		-82.058	3.817		-106.98	-18.532	81.189		14.331		221.245	80.499	4.018		-25.406		90.3	10.317	31.856
208.667	5.032	-113.479	25.444		42.241	-8.713		-2.228	-59.002	95.11		-36		223.713	125.128	14.311		-29.636		55.291	-8.36	87.194
208.8	58.137	-133.66	17.927		-217.562	10.689		2.479	-48.347	23.383		9.458		216.933	92.547	6.414		-12.947		77.22	24.608	55.072
208.933	23.121	-162.016	57.975		-412.212	27.59		-12.368	10.633	5.112		3.954		232.737	175.297	-12.262		6.334		15.839	5.423	87.105
209.067	8.478	-124.525	25.051		-195.016	50.118		-10.446	61.025	23.412		28.719		159.848	272.588	-2.901		-8.966		19.084	2.966	63.56
209.2	-32.555	-116.131	20.85		-349.251	39.643		135.276	-8.485	2.849		29.569		205.522	134.599	5.889		-6.394		19.524	-16.025	26.765
209.333	43.171	-42.913	170.208		-237.946	55.379		-131.206	22.074	22.492		71.316		164.921	242.354	-2.365		3.773		43.477	13.975	34.846
209.467	34.414	-54.31	-37.579		-198.223	17.009		123.553	7.638	-57.381		35.77		155.071	107.607	14.402		-50.751		79.324	-13.27	20.985
209.6	17.994	-17.785	157.719		-133.183	18.028		-23.765	23.657	37.49		93.548		194.397	109.811	-7.807		3.917		112.956	19.59	-12.084
209.733	5.775	11.922	43.301		-14.84	6.949		-2.44	14.504	28.906		54.734		142.44	138.769	10.735		-53.394		90.848	12.606	-13.064
209.867	28.184	21.486	-132.761		17.789	8.827		-5.374	26.546	34.62		57.763		152.545	141.98	-3.173		-5.189		127.105	11.12	-15.93
210	19.478	19.814	-14.934		24.271	13.027		5.615	3.41	53.475		72.714		127.953	-42.942	-8.261		-17.89		53.63	-4.062	30.166
210.133	60.437	27.328	34.9		33.978	-4.788		27.189	55.804	79.374		44.67		150.997	80.416	1.873		-4.225		31.609	-0.77	-25.995
210.267	59.702	47.231	52.558		41.65	61.102		37.372	53.995	52.982		39.575		159.961	129.526	14.825		73.758		30.915	-0.293	10.398
210.4	45.482	169.212	102.382		361.968	242.753		148.897	202.721	73.153		421.407		309.9	134.762	17.743		347.822		49.631	20.731	37.514
210.533	49.664	56.497	267.081		350.354	462.291		215.251	282.918	290.907		335.152		425.056	191.325	63.743		349.831		230.129	104.652	27.678
210.667	120.884	183.74	282.303		359.878	441.865		122.549	224.586	317.606		282.368		249.459	235.423	50.042		312.59		305.653	199.723	92.514
210.8	92.497	74.585	116.744		325.261	664.846		333.969	208.889	-113.408		442.916		463.914	70.371	14.591		316.224		298.714	126.371	59.088
210.933	219.12	54.513	137.269		346.934	477.336		196.021	198.984	-496.598		370.516		420.66	238.155	14.922		310.983		228.714	124.39	15.447
211.067	144.373	57.183	207.05		301.944	517.081		142.502	283.656	-467.56		242.786		367.477	110.57	61.517		220.928		166.727	180.887	27.545
211.2	69.185	67.201	165.967		255.98	423.937		167.469	246.395	-271.822		299.655		365.427	140.29	28.466		291.923		173.955	194.831	32.6
211.333	125.153	679.526	126.992		212.62	389.34		106.42	224.254	-252.638		335.341		330.468	147.559	7.574		207.101		248.362	146.611	55.394
211.467	23.106	179.772	114.84		163.17	373.993		55.453	119.158	-192.713		257.605		295.477	103.607	42.903		105.108		165.227	126.734	83.901
211.6	11.836	124.077	95.12		237.656	296.695		99.3	92.448	-133.329		266.734		258.131	95.563	-19.533		175.509		100.514	112.254	10.759
211.733	23.76	57.196	138.698		189.971	313.355		70.265	81.717	-34.35		230.366		180.339	38.709	-7.932		2.095		39.453	65.598	-2.998
211.867	-5.778	136.463	150.522		167.745	228.507		49.941	110.279	-28.127		235.429		216.448	20.008	22.691		165.225		113.289	57.424	-7.875
212	27.572	66.541	167.564		181.857	289.897		30.076	50.86	24.24		213.767		203.037	16.756	-13.994		130.907		116.824	82.976	11.608
212.133	7.611	70.825	174.904		171.568	257.585		110.551	83.391	-42.095		186.918		212.308	150.185	12.383		216.864		161.342	16.405	-13.218
212.267	7.394	93.965	-20.452		194.257	290.258		64.362	46.84	17.408		215.04		216.186	86.205	-7.818		147.696		69.88	16.276	12.356
212.4	-14.799	77.314	235.58		200.494	146.251		60.134	86.467	-84.504		212.374		261.276	97.6	16.039		142.958		38.473	-7.961	17.643
212.533	11.163	23.942	-13.413		202.57	282.911		61.299	94.376	-145.109		193.023		206.413	16.665	13.059		162.462		101.463	-15.084	-5.371
212.667	6.417	68.96	60.854		265.463	301.582		25.826	45.192	-95.563		167.301		196.929	59.036	19.725		181.23		59.212	75.289	13.14
212.8	22.452	2.029	53.554		214.556	366.309		20.225	71.269	-19.238		207.853		241.2	89.508	7.97		142.008		45.584	33.785	22.073
212.933	11.522	42.864	37.41		259.37	328.047		45.596	48.167	-27.551		135.213		204.336	90.967	12.779		107.195		54.044	-23.8	-34.116
213.067	59.139	61.132	42.932		148.093	311.921		65.323	58.487	-51.625		159.169		165.306	117.379	10.71		88.251		79.78	38.769	-18.231
213.2	-40.268	125.311	19		92.492	365.977		57.564	80.94	-77.067		112.341		135.901	110.853	-5.764		87.572		36.786	2.693	-42.196
213.333	14.677	72.68	73.207		78.185	403.701		5.655	66.881	-154.494		179.512		201.526	144.066	24.468		17.954		57.787	16.113	-62.317
213.467	-72.977	123.561	110.61		93.951	226.449		107.755	46.495	-104.25		189.158		164.667	105.563	29.895		92.731		34.344	5.283	-97.641
213.6	68.267	65.224	86.349		83.653	288.414		52.631	19.17	-29.607		200.624		195.221	128.87	13.116		85.911		-22.317	-7.938	-100.212
213.733	29.409	77.81	133.505		129.225	340.205		45.676	33.627	-41.01		188.137		159.373	105.446	7.723		46.82		-5.412	13.41	-175.61
213.867	26.145	60.42	106.012		68.871	409.341		38.101	1.421	19.551		181.437		185.532	136.424	7.334		71.196		19.359	13.611	-145.327
214	-24.989	65.94	80.907		15.783	283.818		53.599	64.783	-14.946		278.486		193.882	67.968	-11.659		20.057		-18.019	10.732	-156.116
214.133	6.554	52.638	155.063		7.517	311.156		92.541	17.512	11.071		175.08		158.139	115.894	9.991	15.628	129.738	17.8	57.468	-7.73	-156.595
214.267	8.838	32.789	105.433		57.436	394.458		19.461	29.26	10.506		-14.687		137.785	126.162	14.529	441.548	84.665	186.528	29.579	14.446	-164.076
214.4	63.879	-4.314	152.553		44.416	224.643		71.525	22.871	62.407		204.125		130.475	127.969	-9.614	418.221	78.275	102.436	57.546	-0.543	-134.797
214.533	109.984	29.785	162.474		94.511	334.101		40.575	-15.468	66.194		77.364		127.093	153.325	-5.239	260.876	88.375	404.072	109.411	-5.712	-180.847
214.667	28.101	38.033	172.441		67.877	272.849		-15.401	13.169	154.816		141.776		153.094	104.074	48.484	233.71	43.049	228.571	68.771	-15.919	-166.245
214.8	23.725	12.854	122.368		51.584	275.602		110.21	1.596	30.096		73.35		145.159	72.105	-1.988	302.624	57.369	177.993	57.01	20.144	-115.375
214.933	27.661	23.353	144.879		33.172	263.832		42.223	4.779	109.275		12.737		111.657	61.087	32.211	297.874	65.911	149.96	48.545	-2.515	-107.659
215.067	-6.198	19.604	190.447		147.538	316.002		29.419	-10.402	98.373		81.577		171.726	102.568	-2.055	293.683	90.488	160.25	15.091	-4.455	-160.397
215.2	16.144	7.342	132.948		57.768	262.411		46.233	32.364	122.871		96.739		179.447	142.386	5.359	355.762	83.646	197.481	14.817	8.886	-215.367
215.333	45.838	29.186	74.69		71.817	259.472		42.369	35.419	30.881		148.129		154.305	143.789	16.048	320.371	31.057	126.854	23.157	-40.113	-207.24
215.467	18.504	2.998	103.491		87.097	289.594		14.45	22.62	33.954		-3.136		173.407	138.238	20.332	328.934	64.021	128.047	14.984	32.864	-222.594
215.6	26.973	40.489	33.536		214.645	259.424		45.523	7.876	183.683		114.833		269.163	130.298	9.688	284.566	36.595	130.232	27.534	-10.522	-213.688
215.733	24.442	155.071	10.624		239.063	397.169		52.438	6.734	76.437		77.112		75.682	136.945	5.828	300.583	39.649	49.588	-0.652	33.416	-57.891
215.867	16.656	30.209	58.745		150.228	309.907		101.479	-4.514	63.933		77.642		104.258	92.479	2.909	266.317	39.616	89.376	-10.526	-26.393	-98.777
216	43.076	19.884	142.056		99.592	249.972		6.381	-21.484	154.248		160.743		181.252	123.671	-5.373	260.361	63.382	2.505	20.1	3.639	-68.195
216.133	12.488	25.408	77.366		91.641	381.974		161.519	19.046	73.84		48.361		165.808	119.525	9.72	272.674	86.9	10.517	-3.213	-12.077	-54.361
216.267	43.633	-14.404	14.63		137.482	315.666		-57.335	-65.777	37.908		-58.508		128.829	156.303	16.704	192.099	29.865	36.354	13.4	20.265	-49.489
216.4	57.453	25.566	10.515		105.643	275.305		44.068	-72.945	-16.592		163.825		146.458	60.537	-4.202	220.424	28.765	110.893	4.038	2.926	-29.136
216.533	8.761	19.191	65.706		110.424	212.552		120.042	-0.587	3.626		48.129		160.564	99.616	-23.837	168.026	24.001	14.66	-20.268	3.781	129.187
216.667	30.17	3.264	-9.27		120.268	279.07		60.685	-42.321	340.912		26.723		101.286	78.391	26.984	126.646	60.269	6.057	21.286	-9.875	-5.783
216.8	76.481	16.745	24.562		92.69	422.865		-39.629	32.079	307.868		43.634		110.597	147.143	3.202	181.14	14.945	69.701	-24.516	12.29	-33.984
216.933	-9.64	35.519	-7.527		92.935	293.933		77.108	40.524	124.219		2.188		103.63	-265.547	16.739	214.316	37.547	23.634	2.96	4.347	-165.668
217.067	49.204	30.061	-9.198		88.028	307.252		126.563	129.452	67.011		24.82		60.687	-285.467	-1.972	136.881	219.217	9.479	22.441	-3.609	-153.781
217.2	3.356	62.312	15.324		124.92	148.434		104.729	70.771	88.763		2.07		128.752	-52.938	-22.184	165.061	116.888	-136.221	-15.727	10.717	-157.494
217.333	-3.847	60.864	56.675		117.972	273.068		129.218	103.066	22.323		36.837		68.445	-18.638	7.818	130.946	109.466	-274.706	1.533	-22.501	-111.577
217.467	16.833	62.121	103.228		82.472	259.431		36.216	62.7	50.648		79.964		108.5	-25.088	10.228	170.026	93.63	-277.708	15.151	22.184	-116.683
217.6	74.343	49.634	39.713		95.006	215.573		29.25	16.153	40.907		123.552		20.491	36.299	37.178	200.177	9.163	-213.77	-29.533	-16.504	-67.676
217.733	83.779	38.649	36		2.005	219.349		14.602	20.585	64.445		113.943		166.367	-19.346	-7.815	216.087	3.052	-236.23	30.438	13.252	-44.482
217.867	35.381	27.324	16.668		13.282	206.459		27.425	32.846	155.552		72.436		114.898	150.959	9.021	222.461	3.279	-123.73	-8.868	-11.8	-27.695
218	6.101	53.13	22.273		127.799	173.39		7.273	31.041	154.285		90.475		98.774	-16.063	-2.6	260.345	14.494	-44.655	8.75	3.379	13.817
218.133	4.633	-6.243	11.367		6.56	212.092		18.263	64.647	6.158		83.05		92.773	102.25	20.797	221.196	51.702	-50.245	-3.963	-2.037	21.954
218.267	44.085	15.819	84.976		53.172	187.634		-44.64	109.52	-25.511		37.806		47.085	206.981	18.232	237.233	-16.121	-40.914	2.655	-17.43	-16.187
218.4	49.586	-11.165	11.507		12.25	191.408		12.995	47.081	79.406		28.026		39.586	62.049	-29.029	172.906	32.085	20.368	-8.885	-12.094	20.77
218.533	15.953	-8.915	48.201		67.772	262.203		-10.507	-2.897	192.856		33.123		37.168	79.64	-24.024	196.712	-22.429	-8.162	1.118	25.302	5.572
218.667	56.451	21.694	76.517		30.664	272.863		128.012	87.315	154.465		57.085		-11.993	97.578	28.513	140.14	-16.779	97.558	9.081	33.41	73.334
218.8	24.126	7.317	60.95		43.389	263.165		59.14	13.58	-32.786		30.009		91.623	97.008	2.071	120.621	38.825	34.324	16.999	7.327	104.163
218.933	50.082	22.781	59.591		76.898	312.784		109.451	41.413	48.91		22.732		122.928	99.814	7.91	123.48	1.078	102.855	-5.375	-17.666	75.401
219.067	29.353	-20.877	5.893		56.324	223.404		63.278	81.24	34.638		28.067		-9.823	57.381	-11.153	139.461	-38.356	102.391	-12.856	-10.22	50.238
219.2	65.905	19.688	18.109		62.052	256.934		59.024	71.92	-1.872		52.697		16.155	98.194	-39.527	225.583	-13.204	75.464	-4.406	23.176	43.63
219.333	21.397	30.12	-36.931		47.83	263.693		31.945	33.631	-57.998		6.777		54.353	97.314	-120.119	141.854	32.942	20.776	-0.798	-16.433	26.057
219.467	33.444	42.62	-15.213		103.536	149.554		48.176	92.254	-25.53		-6.139		42.484	99.288	-71.206	122.5	10.018	55.766	6.501	16.047	7.789
219.6	31.846	71.343	27.314		115.442	210.24		32.902	104.78	-9.285		1.692		41.677	108.471	-47.523	113.152	-8.044	29.138	-12.919	3.9	65.508
219.733	44.568	78.594	61.88		45.881	327.45		36.039	93.985	51.714		17.247		38.251	131.051	-53.306	166.596	96.249	30.783	-8.063	12.159	147.686
219.867	38.095	51.569	85.281		105.973	151.589		18.508	51.699	77.193		-4.985		89.63	118.258	-3.513	193.815	51.64	121.69	10.293	-10.583	130.766
220	26.876	26.315	159.062		147.262	276.879		28.792	58.295	145.235		18.495		27.256	59.917	-42.027	134.135	51.637	118.143	-18.101	-18.848	121.217
220.133	8.702	17.265	216.842		71.753	267.107		-25.737	6.2	-48.213		-14.202		14.469	184.679	-34.973	145.435	62.27	67.379	-12.283	-0.541	94.893
220.267	26.314	27.041	148.43		127.607	221.466		-9.196	-24.065	51.514		14.823		78.198	96.54	-30.468	195.891	43.573	85.04	0.978	18.995	57.83
220.4	41.039	3.185	94.922		102.965	230.09		-34.037	24.24	13.393		7.725		73.34	-16.112	-52.74	179.308	75.344	70.294	-4.926	-23.847	114.242
220.533	-2.861	2.208	32.63		69.221	241.758		-49.136	20.534	16.428		-10.802		59.58	99.099	-77.037	157.998	162.402	-43.994	-20.521	5.431	69.564
220.667	45.379	14.439	24.918		85.032	193.274		-19.561	23.041	108.386		17.069		187.25	94.578	-59.204	160.162	126.576	-316.558	4.891	-3.909	128.976
220.8	52.849	10.458	56.507		66.565	197.491		16.535	26.143	119.925		-5.744		40.714	107.501	-6.156	147.946	91.951	-331.887	-24.645	-47.059	97.843
220.933	48.489	19.625	78.062		25.591	191.429		40.793	120.781	194.025		1.059		100.015	134.44	-58.764	146.034	42.023	-344.869	-60.766	-205.176	103.379
221.067	10.458	48.041	251.141		133.627	199.482		22.994	168.851	21.378		-0.843		75.702	92.837	-29.525	128.749	90.153	-208.909	-94.014	-144.875	84.316
221.2	25.268	72.89	103.221		122.675	137.501		5.381	60.374	58.382		6.658		32.871	227.625	-54.331	176.714	60.959	-97.786	-232.072	-157.771	109.282
221.333	26.231	157.558	57.911		-1.142	132.585		-3.891	38.332	19.419		10.524		42.815	61.484	24.933	198.352	72.325	-10.477	-190.182	-79.851	91.859
221.467	48.496	-75.174	122.734		85.875	179.876		-14.416	12.556	56.301		1.863		21.482	38.32	3.206	207.722	64.26	-108.693	-102.901	-138.706	93.803
221.6	30.076	46.122	115.052		58.118	193.814		10.253	-10.652	-8.125		-2.533		48.81	82.547	-7.652	174.347	46.635	6.274	-111.846	-172.956	70.833
221.733	56.454	21.528	61.898		24.064	199.509		62.261	22.617	91.398		-10.977		69.823	83.86	-14.619	158.465	-13.973	-5.717	-81.452	-48.079	100.265
221.867	63.915	18.251	18.611		17.175	189.659		60.049	-37.661	19.344		-5.905		-67.722	112.485	-15.695	215.084	74.964	22.809	-35.973	-69.23	68.478
222	25.539	38.31	-15.192		51.15	191.114		130.876	-15.738	-13.519		6.556		40.55	83.655	26.957	164.23	134.952	15.936	-17.968	-35.705	42.657
222.133	26.317	29.35	-15.465		106.924	323.739		123.542	-22.063	44.934		-10.716		55.803	72.592	16.222	151.691	107.076	-12.43	21.749	-22.29	107.863
222.267	83.649	6.919	-4.34		238.929	91.447		97.191	21.078	3.236		-10.946		73.266	121.845	-17.593	130.796	98.765	-14.56	30.493	-19.352	84.318
222.4	51.741	27.942	17.719		170.71	242.505		63.821	59.275	-44.999		15.061		70.896	104.043	-6.351	93.568	131.512	-12.143	33.786	-17	42.406
222.533	53.957	21.778	22.315		57.167	214.528		30.298	24.136	-18.91		-14.285		106.616	117.506	28.333	174.241	117.824	6.1	61.752	21.858	28.741
222.667	20.87	9.856	68.206		91.848	177.837		40.603	33.152	155.24		32.075		154.064	131.788	36.092	-9.601	145.545	11.827	-5.439	-14.864	-16.979
222.8	9.684	-1.707	173.071		5.699	291.664		9.992	124.936	-127.771		-16.944		132.018	122.008	29.705	207.575	138.045	144.985	14.524	-14.622	32.182
222.933	53.178	31.244	178.845		64.161	229.189		32.445	88.074	37.5		-10.208		113.611	116.797	65.253	135.741	103.78	124.272	41.337	9.317	58.157
223.067	14.553	8.859	119.188		-5.007	212.365		33.35	111.236	20.296		1.858		92.249	101.025	14.027	101.022	106.693	95.231	27.68	-25.878	68.645
223.2	69.263	7.334	153.09		176.378	136.201		13.82	31.659	-3.58		-8.063		149.964	96.965	56.081	147.614	56.316	231.913	-4.574	8.881	138.281
223.333	46.359	27.61	139.158		118.108	86.718		-9	13.265	4.265		-12.23		168.001	131.137	44.333	235.861	95.526	44.421	13.838	-5.587	112.21
223.467	46.06	51.307	155.246		91.771	204.595		8.351	19.278	-6.765		35.007		185.007	109.29	36.038	152.975	100.205	63.308	-12.53	1.741	107.719
223.6	34.412	75.566	136.294		98.808	202.573		-5.884	-21.79	-9.669		-5.688		233.801	137.986	44.198	88.081	64.843	89.662	2.63	12.941	93.888
223.733	7.131	80.236	100.357		96.187	178.195		-6.788	19.134	-19.966		10.09		246.533	28.793	11.176	108.359	142.87	147.67	-1.496	-11.645	96.012
223.867	21.997	72.771	90.741		81.225	186.395		9.571	20.829	-31.658		48.424		224.388	119.611	16.752	86.606	145.228	104.31	-4.34	-26.601	211.216
224	36.354	48.636	102.82		111.465	188.412		-20.861	-1.858	-22.238		54.676		251.774	124.099	107.975	43.256	118.11	142.329	29.2	-23.201	43.842
224.133	96.619	105.472	24.964		68.122	150.789		16.138	-8.68	-33.892		20.335		156.549	107.07	30.452	89.496	125.373	84.412	-4.39	-3.596	82.93
224.267	62.521	105.869	54.576		101.465	137.622		14.646	41.652	27.468		71.638		75.134	130.396	28.388	85.763	125.491	96.472	1.912	37.146	-2.333
224.4	59.713	104.778	110.638		100.217	165.077		-9.347	-15.707	180.94		96.486		240.694	116.854	33.251	18.068	78.669	48.603	-4.961	109.144	37.935
224.533	59.616	57.551	86.015		144.744	202.101		-16.413	42.528	74.034		29.817		150.53	110.539	24.534	55.964	70.338	21.524	13.876	31.367	23.843
224.667	63.695	87.067	98.308		94.065	154.387		-5.949	-19.829	3.06		58.533		132.114	73.586	-2.851	5.157	96.726	10.005	8.321	8.547	-27.796
224.8	61.429	71.592	50.611		146.311	161.651		10.181	9.177	52.374		97.822		94.328	77.556	14.107	25.56	164.251	27.48	2.694	-12.002	-7.559
224.933	78.74	14.674	105.392		123.33	172.54		-21.186	3.039	51.637		67.257		200.431	8.309	15.973	11.713	102.572	33.038	0.466	15.84	23.336
225.067	53.784	59.686	9.13		159.567	138.426		15.481	-11.692	5.136		43.942		191.509	155.318	16.909	-4.329	-49.605	77.38	-11.089	4.715	172.727
225.2	51.92	37.558	67.313		110.518	139.179		-17.833	55.253	28.312		8.928		110.95	-26.195	3.205	24.576	84.106	-6.81	39.995	-2.585	40.128
225.333	45.897	11.183	36.113		60.963	169.634		-22.059	18.903	155.68		-29.964		196.653	218.347	26.648	-8.742	82.473	28.437	36.514	-7.044	-42.639
225.467	45.863	4.09	82.493		121.133	163.054		16.696	31.328	-138.205		-34.331		141.102	13.113	-16.453	-3.273	41.339	55.228	50.899	7.715	138.241
225.6	39.423	20.495	135.707		126.875	184.672		-44.202	-26.879	47.938		22.013		139.362	136.902	9.44	-3.561	39.427	87.799	16.339	-41.513	-14.455
225.733	63.585	15.302	114.668		361.452	212.787		-7.746	6.331	-7.906		-24.809		195.102	93.322	-20.079	-10.816	89.258	70.68	-12.452	20.43	35.653
225.867	116	41.543	69.036		18.979	273.733		9.302	61.441	13.036		113.426		171.509	117.648	2.912	-46.681	97.385	-8.396	3.756	77.391	-127.93
226	75.624	73.699	65.658		127.058	238.766		-19.893	-3.453	8.218		17.37		164.046	162.536	44.37	-9.148	53.493	35.706	10.013	94.43	139.227
226.133	24.027	98.55	37.874		109.667	246.455		-13.844	3.654	13.68		-114.007		240.496	142.224	55.271	4.452	14.242	102.061	-14.613	43.377	-153.068
226.267	18.294	84.983	25.948		91.039	266.694		-5.582	23.028	3.422		152.639		284.178	132.902	-6.13	-3.877	83.931	150.003	0.74	28.602	152.22
226.4	22.55	51.735	-9.126		74.372	272.309		3.504	37.656	27.815		-80.917		178.821	146.83	35.321	-40.495	52.217	153.84	-55.665	2.645	0.762
226.533	8.17	71.254	-6.626		12.405	244.547		-31.968	44.231	-20.254		-6.343		7.238	150.793	-11.3	-4.557	120.47	166.369	-61.025	14.544	3.116
226.667	68.994	20.388	45.065		41.124	296.923		-7.393	37.212	156.384		-3.84		133.143	158.544	11.852	-39.224	87.007	113.651	-49.669	-63.347	18.454
226.8	74.133	37.092	79.412		30.81	250.588		-6.937	127.587	-160.912		125.99		102.499	173.07	23.245	-21.896	51.256	74.353	-96.839	12.09	-4.17
226.933	72.041	28.507	63.654		-2.705	248.979		12.155	123.227	-2.505		14.879		131.033	217.573	2.923	-26.179	118.215	65.839	-117.26	9.812	-8.551
227.067	60.802	61.096	50.945		54.756	278.727		-34.209	97.027	16.987		-19.871		134.054	122.551	16.503	21.814	48.213	80.799	-100.686	31.136	-11.629
227.2	-3.133	-7.412	27.463		-6.432	234.561		-29.706	74.719	27.421		3.446		98.744	140.454	19.818	50.159	74.302	83.522	-68.931	9.891	-0.219
227.333	48.252	103.758	-14.835		-25.837	242.981		11.819	-7.111	6.498		-17.995		172.474	79.59	17.51	68.114	101.472	91.321	-91.46	37.598	3.549
227.467	75.12	74.692	-83.515		-57.709	221.954		6.549	40.073	1.864		16.514		126.859	66.823	25.533	64.057	44.964	42.698	-142.688	-35.758	4.276
227.6	36.095	64.137	-242.541		-44.345	238.618		58.06	15.558	12.184		-24.78		60.092	-46.435	2.077	31.469	83.607	10.201	-128.381	-52.652	-24.41
227.733	73.391	-18.624	-275.667		-57.988	207.45		67.252	-11.605	-3.743		-44.04		66.669	27.563	29.619	49.485	61.847	84.829	-68.76	14.334	-115.163
227.867	80.11	126.091	-281.254		-111.004	214.439		65.475	17.861	-112.105		-85.411		40.584	22.472	-9.349	30.588	37.532	79.789	-98.174	-75.252	131.142
228	51.295	-90.89	-269.914		-195.938	447.572		34.854	-0.34	-152.678		-110.906		136.948	24.108	19.841	117.529	46.244	68.589	-92.891	-305.443	-6.691
228.133	74.993	8.768	-311.126		-280.795	-95.026		12.534	-12.015	-122.669		-117.241		141.937	19.068	6.078	98.126	75.228	79.137	-64.933	-267.37	7.612
228.267	33.875	52.221	-326.316		-305.157	228.223		25.221	35.484	23.418		-161.825		218.453	-45.131	10.589	60.811	43.202	58.399	-26.292	-203.552	3.151
228.4	69.85	7.026	-258.234		-106.421	155.116		48.017	-38.289	47.85		-173.284		94.92	-6.692	21.303	97.553	76.144	46.607	-8.964	-104.24	-8.063
228.533	27.39	94.366	-199.617		-143.097	212.872		-22.921	16.255	7.784		-234.375		61.49	-0.796	40.758	112.553	32.427	14.713	30.022	-114.95	2.927
228.667	28.012	17.056	-190.88		-282.216	222.437		-12.152	-96.669	43.731		-192.851		77.663	10.393	3.552	116.007	93.952	26.074	-18.287	-84.815	-130.319
228.8	5.035	-14.646	-265.127		-163.612	266.586		-24.21	-151.484	71.734		-198.137		132.771	17.431	11.286	92.187	69.838	42.819	10.688	-134.625	-15.188
228.933	57.6	-59.132	-254.93		-202.671	210.458		11.498	-150.24	61.347		-123.708		133.541	9.144	49.421	54.906	63.426	44.252	11.32	-56.137	27.131
229.067	20.284	6.025	-199.924		-290.362	288.624		7.897	-142.076	60.642		-53.965		164.091	-23.665	12.663	46.177	63.201	165.512	-19.054	-93.033	137.085
229.2	33.027	-2.957	-232.145		-331.052	242.403		17.697	-100.098	79.377		17.825		136.006	-4.486	34.193	67.276	86.517	73.653	11.875	50.722	8.338
229.333	61.805	31.025	-212.489		-262.26	272.408		32.85	-57.5	10.458		-12.873		164.035	18.536	21.598	43.911	81.361	152.383	-9.329	86.762	-4.401
229.467	30.29	17.545	-308.829		-122.006	277.925		18.125	-45.304	78.497		70.678		133.5	-6.528	-28.064	8.361	44.902	125.821	36.291	57.321	-20.156
229.6	11.871	16.639	-292.323		-47.705	270.919		44.973	-36.859	37.782		55.874		86.479	7.656	10.999	7.517	72.515	-63.492	32.2	155.774	5.653
229.733	25.514	59.044	-149.226		112.453	295.045		-10.017	-46.483	41.552		18.329		156.697	-0.536	7.3	26.299	50.284	142.451	14.853	18.202	-15.988
229.867	23.247	138.9	-57.759		-78.204	258.548		-23.297	21.046	55.785		56.955		153.886	-24.321	32.996	8.636	42.166	61.951	48.138	9.807	33.349
230	-18.385	48.287	-19.422		-54.234	269.392		17.497	95.902	56.913		63.003		109.179	9.116	-12.666	-22.976	47.927	31.116	63.379	24.185	-20.071
230.133	-15.489	-82.873	-9.961		-3.756	216.976		4.244	-48.052	100.004		37.177		121.146	-7.478	-28.727	42.946	46.364	29	-31.495	-52.796	-4.093
230.267	-6.358	-13.73	-13.194		51.715	228.541		-24.083	188.976	44.722		19.059		182.075	-21.897	-21.792	51.481	31.354	129.471	48.125	16.61	-124.911
230.4	22.572	52.501	48.309		76.53	256.1		29.89	157.57	103.61		28.684		92.959	3.188	13.87	54.783	41.587	45.962	541.228	35.485	-7.346
230.533	-16.275	65.437	30.302		107.881	227.501		21.233	84.474	37.788		11.123		41.784	-33.048	33.925	92.728	-6.234	42.19	406.247	39.961	11.411
230.667	-102.432	46.432	50.448		184.284	187.187		-7.44	101.537	5.079		17.625		120.322	-36.511	-80.247	96.646	34.855	-46.278	456.279	55.061	120.49
230.8	-46.578	46.05	123.696		134.936	203.199		54.457	19.084	112.311		12.303		222.416	-17.587	-74.798	80.545	1.871	-367.471	432.065	-28.056	-18.221
230.933	-95.213	14.167	110.96		103.227	199.099		23.111	45.821	47.756		11.879		114.806	-40.7	-118.788	85.922	22.792	-146.899	46.558	56.596	22.274
231.067	-41.465	8.466	101.115		61.935	215.112		27.644	33.804	43.281		14.209		191.588	58.9	-120.217	63.978	-29.569	-30.302	-538.324	-8.541	13.568
231.2	-45.178	10.496	94.234		85.056	222.483		32.837	16.159	61.603		-3.489		116.744	-34.19	-117.79	139.103	-7.841	56.25	-351.198	-37.227	-18.027
231.333	-90.705	51.495	83.517		142.23	228.067		12.971	11.002	-3.549		28.259		-43.133	-64.422	-94.186	69.991	-10.568	71.681	-115.812	9.622	-3.759
231.467	-213.122	9.716	-6.557		72.634	188.26		51.049	-13.651	69.447		18.044		242.441	-103.869	-82.942	77.092	49.305	168.172	-97.214	-5.55	-5.85
231.6	-165.116	32.975	-22.382		15.458	163.672		48.751	29.513	23.107		-66.384		25.297	-75.867	7.456	60.247	-14.007	111.488	-323.765	-37.681	-105.128
231.733	-116.839	10.073	80.227		33.398	254.05		57.08	-77.168	-14.299		44.283		304.756	-163.737	6.111	49.501	-14.685	142.547	-566.719	32.887	134.834
231.867	-145.658	12.022	44.042		3.311	238.606		80.568	26.095	27.452		-280.915		121.659	-179.526	-37.795	77.495	35.47	-6.33	-492.201	20.168	16.922
232	-122.42	22.842	102.312		20.31	236.228		123.662	66.188	28.821		-181.324		50.624	-172.318	8.535	131.42	-34.685	162.704	-305.496	42.067	25.749
232.133	-104.039	-9.618	108.835		1.522	228.837		-22.849	93.382	-47.719		-111.888		24.966	-104.973	8.977	146.251	44.449	77.526	-282.801	-37.81	9.545
232.267	-89.987	-2.48	78.727		52.976	255.67		60.854	25.238	8.422		-61.316		54.503	-66.21	14.34	152.058	-27.247	74.783	-316.485	-89.911	7.318
232.4	-141.414	-16.576	90.262		-20.964	218.056		23.457	50.362	52.992		38.008		193.137	-88.774	-25.29	102.414	24.204	190.608	-23.754	-19.719	-7.876
232.533	-60.574	25.973	75.448		37.848	243.168		26.431	33.611	3.276		22.51		64.08	-62.348	4.513	78.211	-62.999	73.039	32.455	-235.938	-19.703
232.667	-59.771	27.482	53.81		88.814	345.157		19.016	37.445	-11.59		17.927		182.684	9.213	-26.594	140.014	-160.733	76.273	248.691	-100.112	-38.233
232.8	-26.083	-7.365	65.456		33.195	294.066		22.364	39.154	9.22		6.372		348.568	55.53	-50.106	133.926	-187.033	77.847	152.739	-1.139	-102.888
232.933	4.459	34.038	145.22		14.173	291.765		45.567	-3.253	-61.897		-40.148		-86.947	77.85	-5.507	43.168	-202.195	79.431	159.376	-20.704	-60.505
233.067	-38.64	9.903	105.177		-130.117	365.625		64.681	-11.494	50.469		-43.286		220	43.083	-26.282	112.931	-233.91	42.668	157.756	-5.845	-74.497
233.2	-66.067	51.091	65.846		-249.564	358.808		65.601	18.105	91.377		39.898		124.229	75.18	16.96	79.276	-146.939	25.765	193.267	-20.867	-42.916
233.333	-78.632	50.151	96.129		-306.692	371.338		-9.127	6.438	52.52		15.355		123.543	69.079	-18.877	67.296	-150.835	-9.669	262.397	-1.519	-28.646
233.467	-146.873	35.554	104.836		-371.136	362.378		61.377	22.375	94.068		33.917		124.203	57.749	-16.335	3.835	-94.189	-70.815	218.756	-1.201	-172.792
233.6	-141.114	77.444	155.243		-379.938	351.35		49.791	-28.575	24.475		62.794		138.358	102.743	-29.854	87.452	-186.354	112.02	219.692	9.801	84.151
233.733	-129.35	35.175	104.466		-289.068	342.479		25.26	-13.816	-60.487		122.058		86.512	133.875	-21.634	88.94	-104.658	40.845	197.657	9.506	-46.522
233.867	-100.182	38.766	30.479		-165.119	261.177		45.77	-111.869	15.259		-77.756		151.701	-63.377	-23.329	-44.182	-93.602	100.865	108.62	21.992	-47.5
234	-87.802	-22.613	91.054		-88.549	317.099		7.743	-50.9	-11.175		63.259		120.863	-324.825	18.891	-44.853	-84.417	30.745	73.672	36.475	-37.133
234.133	29.743	19.057	98.249		-39.555	314.612		119.446	-195.376	58.261		129.873		175.243	-202.346	-4.694	-160.472	-43.151	11.704	54.19	7.869	-47.785
234.267	85.053	-4.573	139.82		-77.156	341.516		37.07	48.367	87.682		97.936		215.595	-108.647	-2.075	-71.941	-89.676	8.724	11.873	-139.634	-111.428
234.4	-102.002	45.432	179.333		-10.904	361.23		-89.284	-118.833	0.807		137.874		173.118	30.575	9.217	33.987	-16.619	4.435	14.961	-7.207	-66.756
234.533	14.787	10.867	101.708		43.839	311.665		32.133	-104.203	-18.087		37.877		98.262	19.196	4.125	8.465	21.089	4.329	4.364	-9.862	-57.548
234.667	29.686	43.063	76.568		13.744	277.677		37.003	-57.433	169.182		38.744		146.593	-31.507	-21.081	29.411	-20.905	-396.772	-39.011	49.997	-57.29
234.8	41.366	25.792	63.786		-8.997	276.042		114.385	6.17	-148.537		33		-38.976	92.496	7.16	23.912	4.443	-502.076	-58.614	29.053	-96.262
234.933	15.368	-5.495	105.88		2.941	300.633		-15.035	-72.159	5.651		9.047		124.56	255.276	-13.401	28.567	67.235	-436.01	-80.482	8.112	-116.416
235.067	108.507	13.35	126.122		15.356	292.855		28.997	-183.082	-41.775		36.033		298.896	90.365	11.751	15.219	92.314	-228.116	-33.688	157.169	-111.506
235.2	-86.469	21.441	106.544		119.017	304.29		-6.565	-169.371	-14.693		173.753		-37.622	176.15	-1.396	-12.384	131.058	-454.218	-44.015	-5.695	-116.931
235.333	12	28.197	62.64		129.935	304.744		14.355	-254.915	-31.61		131.464		72.228	121.223	5.463	5.744	121.059	-201.478	-40.48	12.932	-91.733
235.467	38.831	51.984	105.356		193.875	285.906		14.52	-134.874	117.612		57.704		121.68	88.568	-33.069	15.819	54.312	-378.226	8.865	23.068	-131.813
235.6	55.038	130.681	124.386		50.649	320.759		28.525	-125.902	25.743		142.664		180.82	56.211	26.427	-9.025	51.043	-199.817	-31.576	36.337	-144.614
235.733	163.523	-62.783	127.009		120.878	300.362		-130.182	-77.823	-14.059		48.48		270.705	110.873	22.344	30.434	3.184	-166.908	-30.248	-3.93	-117.752
235.867	149.718	-14.203	100.49		213.724	315.696		10.996	-18.664	15.667		45.682		57.403	155.128	-9.074	27.507	78.959	-178.485	-31.834	96.396	-128.194
236	100.574	34.977	117.542		205.126	288.07		120.448	37.892	167.635		13.154		176.794	93.545	40.853	5.711	35.621	21.01	-18.623	10.367	-95.284
236.133	73.606	178.362	110.268		154.415	286.169		-25.642	134.844	-163.067		9.809		73.508	78.451	19.712	-4.75	71.905	-158.585	14.419	10.682	-48.597
236.267	16.509	99.02	120.807		179.163	284.039		19.59	101.869	18.942		-3.24		156.099	54.494	14.736	4.383	74.597	-25.603	-31.205	-101.784	-16.854
236.4	15.326	69.482	141.941		188.614	222.902		13.301	131.078	-6.427		4.138		89.254	64.159	10.127	4.302	54.309	3.508	21.438	152.071	-25.251
236.533	17.917	-12.755	141.971		54.794	192.252		-103.693	197.74	-15.111		-15.887		233.92	51.993	-9.964	11.241	41.594	146.781	-34.293	36.12	-2.923
236.667	16.663	132.987	137.962		103.915	215.769		89.191	89.954	7.522		-169.959		121.658	93.127	15.078	-3.168	26.472	17.858	-28.434	-77.791	58.15
236.8	145.694	-61.83	100.73		31.009	211.2		10.743	110.99	-1.96		101.313		153.072	85.988	7.066	-0.143	-0.206	-5.695	-24.858	101.484	86.916
236.933	-73.294	40.346	97.458		21.375	162.941		-116.929	86.291	-24.124		16.263		188.711	44.295	11.434	3.933	24.489	-41.956	-38.657	-100.003	188.967
237.067	140.546	31.958	63.992		-22.983	200.297		-10.44	92.938	13.597		58.201		123.758	22.838	19.658	15.776	14.718	71.13	-32.542	60.902	95.118
237.2	18.433	28.548	89.728		8.96	384.694		-4.995	77.853	8.248		12.516		179.26	113.648	22.248	-3.4	41.251	123.48	6.2	59.368	93.73
237.333	-79.271	28.79	150.674		5.167	153.253		13.943	128.056	-156.742		44.014		157.144	59.743	15.537	-4.612	20.515	49.975	-60.279	72.889	111.151
237.467	2.712	16.486	22.523		-39.045	215.934		1.59	143.197	163.823		-7.654		227.059	115.876	-9.648	-16.234	22.31	71.896	3.74	46.316	63.867
237.6	49.482	27.335	60.793		-94.982	271.802		7.337	74.476	19.291		8.698		182.717	95.196	8.811	5.959	79.372	27.445	-5.746	24.963	10.121
237.733	45.374	10.86	59.337		-270.714	228.195		87.245	54.425	12.144		20.577		104.917	58.384	43.712	-10.431	82.369	28.061	-25.388	-2.331	-4
237.867	31.707	7.875	61.917		-382.387	215.488		-109.596	22.78	-4.689		-22.839		124.116	24.151	-0.272	-10.625	74.747	-16.906	-4.928	17.93	35.35
238	-8.874	1.459	30.079		-367.319	-135.113		-4.576	59.508	-24.028		-132.279		291.416	75.745	-27.78	-7.563	74.728	166.241	-39.843	27.212	-13.349
238.133	122.972	-3.544	85.382		-274.276	-158.438		-3.599	64.065	-10.982		168.546		27.357	71.789	50.422	-126.194	43.331	137.695	-23.809	25.205	-11.057
238.267	-124.068	-18.465	78.397		-277.97	19.557		15.759	85.524	26.478		6.913		101.833	109.389	48.39	-148.509	22.313	200.746	-26.088	189.205	-12.916
238.4	152.49	-25.553	90.941		-357.689	215.671		10.334	86.651	-8.181		-36.631		311.863	132.214	2.77	-172.971	56.209	78.642	-28.906	-102.368	-20.422
238.533	32.251	-12.367	30.827		-261.729	294.607		9.7	61.624	31.813		-16.097		95.49	160.3	32.647	-185.256	125.985	-51.59	-33.314	48.53	-16.614
238.667	42.665	21.86	-282.737		-268.748	224.552		82.268	8.282	15.579		-11.764		-49.752	-29.105	38.382	-192.942	126.349	144.95	19.552	29.36	-2.244
238.8	-102.904	11.431	-221.779		-370.863	160.316		-12.309	146.129	43.537		-53.81		157.393	111.844	47.574	-183.033	109.504	174.114	1.798	99.161	35.117
238.933	17.537	-11.865	-174.836		-350.144	153.845		3.955	-72.457	-4.71		-123.374		97.643	225.158	55.573	-193.781	65.282	110.344	-24.644	86.21	52.229
239.067	10.403	-19.603	-188.992		-353.558	318.251		24.356	22.695	51.799		-126.705		89.224	-2.551	-32.926	-36.543	88.558	45.915	-13.387	7.748	9.019
239.2	92.251	25.986	-216.894		-274.456	73.09		7.011	137.11	25.981		-285.703		145.126	114.99	24.525	-55.512	68.363	117.065	-40.236	36.697	-13.531
239.333	72.108	-18.508	-198.43		-196.771	202.824		-108.46	-7.973	62.801		-87.901		45.364	122.055	-14.957	-19.863	66.56	-39.737	-14.102	75.724	-8.279
239.467	115.582	-39.425	-269.86		-171.92	191.69		-3.68	8.519	82.429		-189.645		60.963	81.315	-7.317	51.846	69.09	-56.612	-76.635	51.83	5.609
239.6	101.013	-35.555	-284.8		-174.523	90.628		18.352	-82.129	53.818		-217.048		58.148	77.839	-10.405	84.371	94.355	-38.259	-17.609	79.287	32.777
239.733	7.145	-171.34	-260.318		-215.739	137.758		4.61	53.599	87.236		-164.204		52.617	84	18.896	80.255	89.823	-128.629	-21.088	158.343	30.904
239.867	25.317	-178.675	-210.602		-232.988	124.58		5.477	-10.996	34.198		-38.918		295.197	73.767	33.369	185.096	99.613	-12.071	-33.99	45.295	8.446
240	-12.084	-135.844	-207.055		-184.683	171.613		9.511	-22.251	154.141		-43.358		98.941	236.837	11.333	123.221	103.453	138.843	-37.44	55.066	8.425
240.133	-7.118	-41.663	-143.584		-224.47	157.361		-5.059	31.579	-92.415		-36.406		63.26	-70.799	8.696	122.844	77.099	127.211	-63.017	64.667	20.457
240.267	-3.054	-70.966	-103.581		-241.121	135.682		108.596	14.393	52.331		11.481		148.126	55.855	-28.078	299.26	203.948	47.531	-20.156	-34.27	72.63
240.4	74.964	-80.865	6.008		-168.502	446.165		301.524	-3.294	82.214	11.238	168.534		202.987	218.28	35.682	371.281	434.246	172.578	197.201	217.154	27.843
240.533	46.561	-120.502	141.409		-54.897	212.006		205.673	-39.276	61.423	310.082	416.649		369.467	319.277	8.574	417.317	388.457	158.836	359.138	-23.279	-14.791
240.667	69.083	-66.985	294.215		65.559	422.446		184.56	117.177	111.796	157.136	462.085		383.477	342.196	60.679	428.926	381.856	282.52	218.181	237.995	31.041
240.8	24.196	-43.392	321.579		430.904	651.066		118.119	-88.891	-76.562	156.325	234.909		154.155	288.206	12.296	282.295	300.641	353.484	269.688	40.236	9.191
240.933	18.361	-11.662	397.736		433.263	287.221		188.461	180.617	69.495	156.136	359.909		202.885	191.398	34.749	305.196	341.859	497.078	199.61	72.567	48.664
241.067	19.554	-25.908	227.73		334.885	444.112		194.901	39.741	55.1	12.302	358.489		181.893	186.623	5.735	310.255	252.416	195.197	154.759	111.943	72.556
241.2	50.917	59.082	137.673		325.356	381.36		130.066	42.401	50.562	158.366	370.409		213.827	222.146	31.521	365.971	202.658	306.883	166.09	72.487	54.342
241.333	11.802	71.814	216.067		169.989	462.876		162.505	57.797	110.338	-156.863	188.355		123.693	209.805	42.679	265.4	194.002	278.327	88.063	187.473	61.529
241.467	30.221	256.979	356.313		234.855	364.317		100.954	224.56	63.232	156.878	131.888		260.927	141.719	83.973	294.863	178.614	117.057	179.536	31.135	92.112
241.6	44.543	263.646	176.684		173.15	398.945		20.388	64.209	68.749	25.727	171.5		-28.958	122.179	-1.577	214.933	125.273	65.096	96.923	-17.48	71.999
241.733	-18.55	236.489	96.938		153.927	336.411		7.142	24.686	61.973	-16.288	102.367		65.765	150.659	36.426	193.358	123.978	89.639	95.64	63.968	70.331
241.867	12.906	238.016	106.309		132.914	358.57		15.07	19.345	45.315	311.817	315.2		195.28	47.156	26.98	155.576	143.531	170.854	77.35	133.054	67.997
242	43.068	149.548	97.037		159.873	357.455		1.083	-89.561	17.758	7.563	150.234		237.934	108.431	-31.758	174.012	134.604	-13.781	19.274	-129.853	35.116
242.133	8.238	107.52	161.928		114.961	397.638		122.695	10.246	37.226	312.455	6.484		169.985	106.365	-8.353	224.962	134.041	149.218	20.523	-30.067	17.56
242.267	14.222	73.934	-4.485		93.921	220.055		34.417	-33.502	-6.195	-156.081	60.043		277.418	121.585	24.935	269.86	148.567	50.931	-8.288	-19.429	17.813
242.4	-4.617	58.062	147.358		160.848	397.796		10.941	-21.334	4.867	-17.439	74.728		272.554	169.904	27.165	342.717	161.11	-108.922	29.515	-20.965	10.539
242.533	10.927	35.114	112.961		162.501	282.873		-87.11	22.415	21.54	-156.077	67.89		329.721	109.561	31.299	106.56	30.077	144.804	-8.87	-90.373	-15.942
242.667	-10.794	69.141	125.53		100.078	159.926		83.267	11.617	6.819	156.256	123.623		386.463	148.591	-31.166	263.554	139.464	-17.855	-3.238	54.013	6.857
242.8	16.537	80.542	138.296		167.474	415.196		15.593	267.574	-19.21	-8.249	60.434		362.49	74.632	-12.452	128.246	109.245	-3.596	21.413	-39.047	-4.408
242.933	-24.616	55.311	97.985		203.606	344.999		-4.518	27.252	-22.332	155.867	-12.462		348.624	107.992	73.957	181.991	160.87	-10.846	-5.53	125.297	-14.09
243.067	8.316	60.774	68.566		127.507	208.607		11.422	65.944	8.717	0.636	63.105		356.884	131.445	12.83	184.746	152.36	23.571	2.805	-197.245	-14.238
243.2	30.317	90.984	108.103		170.537	421.795		-5.401	56.933	-35.103	2.25	48.086		309.593	148.284	34.233	207.584	190.258	-12.941	14.802	171	9.17
243.333	4.321	66.501	126.221		203.995	375.552		-5.948	134.954	-18.139	-1.902	98.148		495.031	102.856	-10.144	190.986	-6.224	-14.972	-16.031	-145.188	-19.858
243.467	7.232	24.108	132.966		82.604	219.239		13.708	-99.456	34.803	7.724	49.73		308.937	116.661	-7.456	197.23	146.89	-28.992	-4.489	170.71	-3.889
243.6	-5.315	67.492	124.041		138.772	325.353		13.162	128.453	-35.77	-155.624	30.481		354.964	162.022	6.885	235.635	137.845	-60.394	0.459	-293.167	14.168
243.733	24.86	20.925	71.359		95.188	321.763		6.874	-61.336	29.278	311.325	36.927		385.088	111.87	8.767	261.557	246.213	-164.476	-1.698	146.047	18.815
243.867	44.549	78.727	82.473		109.269	361.7		-9.872	-10.255	14.027	-155.567	41.549		350.67	168.198	43.872	255.613	125.165	-310.322	-195.864	43.69	27.367
244	-11.338	82.65	53.097		35.158	333.982		-131.358	57.006	156.835	156.037	74.286		379.33	268.471	13.759	267.134	96.217	-145.92	-450.022	6.182	7.883
244.133	-39.118	38.687	54.945		69.218	311.829		62.818	-57.224	-25.174	-2.465	56.364		259.717	158.638	-7.547	161.513	126.544	-374.002	-382.27	-13.98	10.457
244.267	-12.706	105.16	41.906		49.578	341.479		-6.972	-15.496	-20.382	7.699	41.487		388.531	130.099	8.979	189.004	66.647	-234.704	-262.935	-57.75	-1.535
244.4	70.249	69.165	30.062		106.637	324.746		88.14	-6.793	29.944	155.764	115.115		258.931	124.955	30.969	109.794	106.145	-291.575	-192.806	-265.12	5.764
244.533	91.656	-8.065	108.686		52.537	266.017		1.335	22.277	-6.139	0.37	105.749		264.124	85.033	30.798	178.408	-11.247	-230.081	-131.228	-140.305	26.173
244.667	51.148	3.097	90.672		104.139	253.676		-6.008	-252.379	9.621	-156.023	262.711		269.106	60.153	16.821	222.689	189.319	-249.011	-94.165	-59.75	-16.761
244.8	156.746	19.27	151.865		75.246	369.307		9.922	-88.367	-5.462	155.732	182.242		399.978	21.845	-16.288	183.81	99.151	-236.523	-60.146	105.86	28.809
244.933	71.143	12.74	53.939		104.684	115.679		-16.932	-250.29	10.624	1.364	41.864		145.142	5.759	5.911	139.248	-34.672	-156.541	-93.2	-150.348	13.351
245.067	91.109	19.163	52.221		133.756	321.661		21.965	-281.499	18.733	0.923	37.348		267.482	-96.216	9.256	-335.042	81.067	-312.996	-71.683	-98.528	42.171
245.2	71.292	17.82	66.401		29.217	101.221		-10.108	-163.385	-120.78	155.841	-150.431		522.061	9.87	-18.054	-393.107	46.206	-51.844	-73.77	-134.213	58.517
245.333	29.891	47.672	98.613		60.769	299.61		-3.519	-61.924	-47.328	-155.846	-38.097			16.773	-115.294	-169.319	91.406	-43.006	0.758	17.173	11.641
245.467	27.33	15.356	63.185		48.886	203.26		-75.215	-221.306	90.589	-2.174	104.015			-1.14	160.127	4.741	88.64	-113.098	11.353	-191.215	24.383
245.6	14.986	81.4	-36.332		35.98	222.617		-4.179	26.897	-34.152	5.065	-94.104			99.046	-18.446	72.922	57.751	-7.632	10.776	-27.596	36.185
245.733	-7.194	41.561	208.834		38.495	257.418		87.402	-69.805	-8.679	1.459	23.319			-5.11	3.887	195.959	151.039	-20.652	197.022	-3.9	21.504
245.867	-4.245	73.699	-36.011		23.233	276.753		7.151	-4.224	-5.379	4.09	24.269			15.875	19.688	153.807	87.069	-66.107	76.578	18.304	57.642
246	-43.474	30.29	232.421		98.258	185.235		-31.149	-69.837	-9.633	3.325	13.74			-117.443	-92.186	148.221	54.392	-14.35	54.833	153.602	11.848
246.133	-25.683	76.686	68.2		20.256	226.566		-67.129	-77.538	6.864	310.99	25.325			4.293	37.641	225.452	63.179	-13.262	17.59	42.91	54.034
246.267	-3.636	-11.263	-78.626		9.349	195.862		-2.237	-34.544	-169.602	0.906	-23.962			29.117	131.396	204.749	34.16	60.879	-3.106	52.95	11.276
246.4	140.01	-9.533	102.958		47.376	229.08		-4.798	-67.081	-22.917	-155.829	150.964			30.685	-40.351	146.799	66.349	28.871	77.842	220.265	-2.449
246.533	104.628	39.197	-89.563		161.055	241.542		10.616	-151.798	110.118	155.753	-115.032			68.771	-19.496	129.414	69.835	100.458	76.618	12.94	11.882
246.667	65.084	75.176	144.369		66.798	152.966		7.121	-229.714	9.186	-7.699	102.948			80.15	-116.413	152.687	77.486	157.924	61.324	84.139	11.3
246.8	50.665	28.259	63.902		84.601	345.82		-3.794	-318.241	5.509	-156.324	-85.186			10.242	129.525	207.557	51.742	68.802	7.247	-32.543	22.473
246.933	20.226	45.929	96.702		19.539	186.87		-18.079	-78.161	6.08	9.618	132.123			44.861	15.421	104.415	52.833	65.868	62.317	73.82	11.647
247.067	24.512	28.689	81.829		44.471	219.535		16.071	-235.816	41.587	9.657	6.14			25.357	38.148	156.184	-11.784	94.674	-15.612	-110.561	27.979
247.2	10.664	97.25	118.712		41.795	243.001		7.243	-97.746	2.168	-1.842	100.181			24.25	-6.146	200.169	31.859	45.893	1.875	81.043	15.637
247.333	-34.786	30.8	222.04		27.355	121.886		-6.347	-114.114	7.166	-156.226	131.474			-9.815	-12.186	176.013	25.235	121.667	15.787	10.432	-12.05
247.467	32.473	61.395	110.961		-15.437	222.221		5.044	-115.795	-99.986	-156.294	87.876			120.314	-12.661	269.283	8.179	122.236	-6.56	17.642	13.096
247.6	-27.851	8.597	116.279		20.843	267.675		-2.408	-170.597	17.481	-155.877	80.207			-86.804	18.657	31.597	73.002	13.696	28.502	43.789	0.128
247.733	-27.126	18.204	125.204		38.34	266.821		2.676	-125.32	10.955	-310.987	53.965			10.12	38.895	236.682	79.049	125.805	15.214	-10.585	4.764
247.867	-66.516	31.37	89.062		7.391	362.402		-1.905	-187.202	7.888	-9.205	37.812			8.252	47.048	168.151	49.158	164.909	21.078	-49.466	20.876
248	-40.091	23.883	-53.705		16.598	228.588		77.226	-105.949	13.926	0.862	29.349			7.257	24.041	157.954	118.875	223.436	-8.443	142.907	6.904
248.133	28.607	30.416	129.96		34.202	84.732		8.709	-205.152	5.689	-6.408	-31.816			29.709	63.848	143.896	76.569	144.118	25.819	-20.09	23.116
248.267	57.372	44.803	-103.563		46.364	312.756		-9.052	-106.79	18.396	-155.838	-9.595			-18.759	28.516	68.806	68.065	200.951	-4.336	-240.16	-7.45
248.4	32.63	9.55	47.893		18.582	230.86		-9.741	-32.701	22.5	155.732	-0.825			-23.059	64.95	194.973	74.238	189.879	11.226	109.427	7.518
248.533	95.553	8.3	91.128		113.138	67.398		-4.414	17.448	52.223	-156.288	4.557			-78.352	3.631	151.993	40.369	169.77	-16.422	-90.314	-5.114
248.667	57.552	14.706	94.467		95.344	196.398		5.669	-13.72	135.249	-160.496	7.441			-99.952	-7.466	193.776	120.725	83.535	10.336	11.156	20.341
248.8	15.006	11.39	100.106		167.197	143.675		-1.69	-37.577	85.307	28.867	31.904			-191.888	38.216	166.681	-148.641	54.64	29.311	-268.119	4.303
248.933	72.143	134.72	169.507		124.505	186.64		0.885	1.506	155.326	29.02	7.473			-214.753	-8.404	218.25	-313.932	68.326	23.264	-135.165	-15.321
249.067	76.088	117.177	145.851	4.451	80.508	306.326		-16.677	24.038	225.854	-163.29	-12.952			-226.397	2.516	170.38	-151.302	39.797	53.069	23.115	-1.947
249.2	9.785	-27.745	240.552	40.894	56.573	230.627		11.83	67.653	94.641	-19.8	-1.263			-267.623	3.906	182.278	-33.88	81.677	89.462	-211.678	9.101
249.333	171.839	136.594	96.636	70.593	68.33	210.831		5.54	68.315	81.861	-10.287	-13.656			-212.068	-115.326	-119.002	-44.528	125.52	112.597	-43.102	-11.565
249.467	69.387	80.132	115.892	78.481	97.129	249.966		-17.348	67.557	87.855	-313.398	-119.261			-236.605	166.34	6.427	26.588	114.971	-194.325	-85.273	-34.433
249.6	41.402	61.007	60.218	53.666	57.752	257.308		17.674	87.013	59.947	5.173	-175.472			-256.77	49.383	104.144	10.841	77.739	-514.138	-16.299	-68.863
249.733	19.377	47.119	114.211	19.175	24.735	263.895		-17.849	57.824	35.647	-155.953	-199.483			-218.581	12.154	107.613	22.02	251.724	-426.853	-1.546	-122.259
249.867	3.86	52.852	-53.168	26.948	6.356	239.602		3.774	65.091	45.161	156.015	-172.497			-201.11	35.046	246.419	48.988	115.468	-372.997	-13.498	-154.522
250	5.072	-78.264	122.317	56.791	-25.723	221.081		19.62	104.903	98.726	-155.515	-88.231			-170.025	29.419	-2.417	10.972	138.951	-258.411	-46.194	-110.954
250.133	15.342	83.434	104.154	60.971	15.167	191.03		-13.41	96.158	45.422	-0.246	-157.229			-34.024	-23.172	199.789	55.377	245.877	-63.913	-92.518	-181.856
250.267	3.892	66.927	97.641	125.439	12.271	182.77		14.206	79.605	68.299	-312.632	5.498			11.376	4.59	123.543	14.589	200.214	-16.9	-76.813	-177.906
250.4	-52.532	98.027	74.526	72.258	33.88	252.033		5.633	85.084	104.766	-4.995	-107.559			-23.255	-33.749	96.791	40.188	143.988	-18.217	-50.309	-131.671
250.533	-34.087	82.163	209.231	127.015	36.829	254.351		-6.511	65.437	72.707	8.613	-15.977			70.801	-18.469	110.886	30.347	82.403	64.6	6.492	-132.052
250.667	-2.031	77.199	207.74	218.697	43.514	226.841		-71.602	71.54	102.5	-312.474	42.639			72.012	-17.289	20.697	79.669	102.545	-2.453	-13.478	-126.85
250.8	68.131	119.418	113.813	228.349	-12.347	118.048		-6.419	45.612	59.47	-155.165	-6.749			74.785	94.403	149.585	44.701	66.76	-6.278	-26.928	-89.944
250.933	43.517	102.363	143.184	75.516	-22.411	248.863		1.189	18.569	39.158	-155.357	46.905			83.201	-2.099	97.126	29.948	60.11	38.255	12.912	-63.576
251.067	5.833	101.933	142.733	100.859	-5.945	334.135		-13.918	-45.082	23.693	1.518	118.535			61.221	-15.601	135.812	162.365	16.438	-21.293	44.895	-73.095
251.2	-37.351	92.679	102.583	199.378	-18.357	232.889		76.668	9.405	24.842	-4.123	67.57			55.668	-34.197	75.035	-26.358	29.976	11.592	-24.24	-126.375
251.333	52.768	73.236	105.718	114.039	14.224	226.1		7.529	-21.667	52.584	-310.796	80.877			11.011	15.144	171.836	64.001	6.555	-16.344	12.491	-130.899
251.467	1.414	82.782	194.089	72.472	14.47	228.616		-80.344	23.439	27.018	155.984	82.758			-86.688	19.196	170.047	136.184	42.625	51.429	59.562	-171.458
251.6	-36.588	76.569	48.626	164.2	7.607	165.134		95.658	7.228	79.93	-311.419	101.986			-7.231	-51.657	110.462	37.669	-67.464	11.954	165.969	-170.348
251.733	-21.237	75.004	41.746	86.822	11.251	201.573		-14.469	185.524	21.427	-2.173	56.861			19.064	-38.104	137.108	-76.105	-75.824	20.123	-61.002	-174.918
251.867	4.781	92.002	94.736	94.068	-64.465	159.76		0.54	55.352	25.67	-155.854	62.543			46.509	-75.067	151.268	46.999	-36.858	-4.209	58.93	-152.12
252	103.579	105.178	76.024	132.44	-251.751	151.754		-134.766	44.71	162.948	311.553	157.861			143.885	-116.162	140.091	188.054	130.512	130.19	-16.192	-90.249
252.133	126.798	118.309	148.053	71.832	-307.927	199.154		54.9	33.766	-97.484	4.35	-12.947			147.317	-87.197	106.973	190.876	-60.325	-45.46	34.007	-22.929
252.267	64.238	57.913	193.71	96.402	-248.962	139.084		19.966	-16.352	46.306	7.63	61.323			138.718	-41.791	165.582	145.77	-29.105	42.47	6.81	-59.392
252.4	41.014	129.366	137.332	98.949	-187.352	58.996		6.254	-26.51	109.962	155.77	58.819			31.52	-32.691	128.014	95.287	-13.291	36.76	-13.189	-34.442
252.533	-2.934	105.241	133.306	67.171	230.231	262.726		-8.45	-7.994	26.398	17.439	54.562			63.938	-54.161	127.463	92.973	-50.904	-0.694	5.661	-54.428
252.667	-7.84	99.607	148.878	114.144	-134.768	225.007		-2.74	21.418	105.35	-1.6	36.574			14.484	-40.21	144.724	56.239	-149.183	105.418	18.027	49.402
252.8	22.826	63.084	140.549	118.367	-111.918	157.214		16.612	-12.982	76.473	3.256	108.42			210.461	-45.989	148.848	128.434	-267.336	143.738	55.634	-3.303
252.933	1.586	81.514	150.664	85.773	-660.05	258.361		-8.415	55.339	64.551	155.949	-5.425			-5.19	-13.712	176.149	6.835	-220.981	104.724	-70.997	-4.515
253.067	43.112	67.045	180.401	137.807	-177.314	200.238		-9.419	187.531	101.894	0.04	23.662			143.051	-35.171	147.464	71.512	-219.773	80.258	2.265	-30.428
253.2	47.368	75.511	168.415	85.548	-162.918	158.223		5.294	53.211	40.686	-156.222	35.13			104.163	7.766	101.77	128.984	-161.572	53.853	33.744	-161.998
253.333	-20.255	7.29	170.542	155.363	-135.609	158.646		-1.897	58.48	155.352	-6.674	30.061			133.524	-30.028	151.217	-189.366	-44.78	50.144	-25.217	-183.038
253.467	-93.53	116.052	166.749	152.569	-16.462	268.483		-7.54	53.673	-54.687	155.477	-70.674			149.04	-19.525	178.048	-126.907	64.821	136.449	19.79	-107.156
253.6	-69.132	19.798	141.096	117.931	31.144	71.784		11.592	-30.411	67.935	-10.395	155.265			61.136	-28.5	164.597	-121.837	266.874	116.006	-11.197	-121.081
253.733	18.72	89.104	173.766	111.643	805.336	338.1		-6.733	57.722	41.281	-156.42	22.262			74.596	-102.499	182.729	34.483	246.113	114.226	-12.594	-100.08
253.867	-48.554	104.727	132.243	80.881	-794.696	159.863		2.583	181.931	35.758	7.272	25.353			140.915	-83.586	150.69	164.979	284.957	99.932	4.193	-140.655
254	10.947	85.723	175.526	81.207	786.499	156.66		-7.057	128.744	17.681	155.976	-92.018			24.872	-49.694	133.887	-6.78	209.192	138.08	17.296	-78.341
254.133	23.174	97.282	166.021	115.347	9.694	138.967		12.827	78.086	52.167	155.996	108.888			23.034	-53.527	148.648	35.617	172.337	109.897	15.435	-116.222
254.267	-91.257	101.676	190.551	91.122	-807.712	98.027		-7.521	43.337	9.652	463.75	-100.001			-95.116	-62.325	165.596	-4.827	121.658	78.662	35.58	-63.796
254.4	-115.23	65.327	169.434	95.21	-90.917	148.443		-21.527	1.335	56.963	13.569	-5.362			9.017	-78.217	113.726	13.009	77.146	22.889	42.846	-4.02
254.533	-148.013	102.433	211.147	94.994	-149.164	185.859		-5.124	-2.644	-113.056	3.001	57.698			-3.322	-15.52	153.26	16.982	98.657	1.502	282.71	143.947
254.667	-131.967	34.344	143.117	88.44	-238.181	187.34		-130.286	112.461	151.987	15.021	0.662			34.71	37.693	141.928	27.703	74.032	9.915	66.697	28.37
254.8	-95.573	93.724	99.913	56.219	-233.516	40.805		125.864	-63.654	15.571	-155.857	-105.228			99.565	-39.187	121.316	-110.028	16.359	-3.281	35.409	10.931
254.933	-114.694	116.12	189.784	62.423	-164.325	114.116		-1.283	62.899	-10.911	155.787	62.007			33.347	-25.273	115.184	110.823	55.481	-41.166	42.695	16.887
255.067	-65.293	33.197	121.749	73.873	-215.62	236.192		-7.036	12.261	41.996	15.835	-5.235			37.873	-13.362	206.404	3.321	34.864	-40.326	-7.013	20.844
255.2	-5.127	25.676	139.518	96.248	-67.543	-12.939		98.387	-20.876	231.292	0.256	-50.348			17.34	-4.009	201.872	14.203	10.918	-68.889	-110.41	11.855
255.333	4.848	17.254	125.422	125.126	-45.826	153.229		-4.701	-26.015	116.582	0.343	-9.315			66.948	5.049	122.403	-122.964	-10.488	-140.707	47.786	24.359
255.467	-84.183	-12.92	147.079	94.853	13.639	98.759		-52.581	-34.95	20.595	-14.42	-8.083			64.659	17.424	217.917	-6.741	30.007	-242.659	-111.602	-61.738
255.6	-170.579	48.282	118.275	-49.597	18.085	-22.308		-5.452	-114.917	-78.086	19.448	-112.74			13.825	-19.648	15.148	6.839	43.617	-235.935	-44.951	-35.308
255.733	-128.157	108.594	108.631	87.821	90.317	183.448		78.085	207.464	-126.509	-4.609	65.46			21.658	-108.425	26.452	8.882	-24.782	-223.664	-2.819	-59.155
255.867	-135.297	3.581	138.504	99.409	121.362	62.236		8.618	43.102	-215.053	-155.796	-69.669			104.485	-87.848	224.54	11.091	-119.847	-237.969	14.972	-109.183
256	-120.582	-9.21	-13.396	227.127	164.279	153.827		-83.145	70.355	-293.669	6.722	-70.907			88.939	-95.035	131.739	55.713	-164.624	-321.193	13.388	-95.507
256.133	-120.327	34.982	118.036	-63.228	140.869	-97.973		-21.85	55.373	-198.961	-156.592	-195.395			45.732	-40.885	186.284	43.65	-303.941	-215.635	-27.689	-96.582
256.267	-91.109	-24.308	145.284	78.63	19.495	25.31		21.571	69.968	-260.991	155.021	-94.54			96.926	-51.226	158.693	119.618	-294.212	-208.54	14.189	-80.112
256.4	-70.53	18.733	254.959	64.757	158.539	-18.356		-132.785	8.713	-258.182	20.354	-111.546			74.635	34.999	242.927	44.728	-353.347	-110.954	-159.524	-48.346
256.533	-27.797	-19.108	117.952	66.735	206.918	9.553		-1.876	36.408	-136.798	155.995	-109.97			23.574	-30.958	179.13	-87.352	-323.524	-103.997	-150.422	14.501
256.667	18.302	-95.214	107.224	199.203	120.926	5.239		2.619	53.116	-276.904	0.871	-106.857			43.297	27.068	197.001	30.183	-275.678	-134.63	-208.712	17.463
256.8	-70.278	-233.016	100.243	85.284	140.922	-78.746		-22.63	22.035	-339.587	-156.462	-106.537			45.057	-7.369	144.208	41.514	-325.191	-165.064	-257.798	30.418
256.933	-74.059	-169.867	232.892	160.531	125.473	94.239		64.298	47.808	-197.217	-156.689	-162.644			-26.942	18.521	130.192	16.624	-111.544	-177.914	-24.777	34.886
257.067	-42.433	-232.475	43.472	84.737	67.517	-25.764		-144.325	32.304	-225.313	155.488	-170.282			19.452	38.128	-235.074	119.739	72.102	-98.084	-27.017	44.254
257.2	4.844	-245.769	-86.214	99.637	70.895	-135.125		-131.483	-8.543	-120.042	-156.665	-159.889			14.407	0.638	-42.963	88.385	-181.305	-133.397	-229.958	155.743
257.333	14.879	-278.823	52.069	116.18	15.164	-0.588		-72.188	17.224	-16.975	-311.635	-153.564			40.558	8.216	6.991	69.957	-130.292	9.793	89.228	-84.217
257.467	-4.873	-196.486	88.97	106.039	4.4	-114.451		-77.879	52.789	-44.721	-17.036	-143.647			99.876	9.132	50.498	39.167	-223.279	3.359	3.284	14.114
257.6	-31.938	-195.333	135.268	75.378	722.776	51.048		-95.217	-12.732	-187.566	-8.728	-191.856			155.45	-4.175	46.038	8.16	-327.48	19.855	6.718	-8.916
257.733	-56.224	8.152	126.296	101.507	-489.205	-25.734		-64.336	133.484	-92.383	-155.83	-150.302			86.3	14.684	2.524	18.598	-103.343	91.14	32.125	2.279
257.867	71.9	-261.792	99.558	136.948	129.437	24.956		-62.489	-64.049	-19.887	-156.001	-120.034			116.691	5.09	131.816	7.322	-82.388	118.676	80.89	50.423
258	12.397	-39.951	146.559	69.142	87.182	-7.374		-46.729	-6.127	-23.344	-312.124	-131.177			106.322	-10.454	163.106	5.658	-8.264	119.622	80.585	51.838
258.133	93.135	-75.421	252.18	87.666	6.239	-10.223		-55.584	47.859	-44.784	-156.083	-167.502			80.283	-14.79	160.729	110.368	29.474	102.28	51.575	68.182
258.267	57.144	-18.338	11.554	67.226	87.038	-9.036		-9.063	-7.921	-158.809	156.756	-164.485			101.218	-4.168	161.249	4.333	-6.723	119.245	118.584	23.556
258.4	37.456	3.975	216.989	71.293	19.897	22.024		-10.934	27.512	-41.205	-156.075	-227.747			52.775	17.015	180.506	12.567	61.162	-1.274	68.993	66.747
258.533	63.781	18.139	135.514	98.556	-20.029	39.079		-27.076	61.427	-58.218	-4.769	-114.796			32.09	-8.553	159.104	31.089	-17.917	160.891	119.36	153.519
258.667	40.019	-144.64	197.402	84.201	28.007	152.768		-7.743	48.498	-113.452	-2.111	-68.5			101.778	2.272	199.202	-20.726	-16.162	64.842	107.653	-57.747
258.8	17.974	144.581	209.62	66.376	-23.825	126.755		-30.038	110.713	-11.574	156.09	-43.385			57.915	-37.144	147.01	-39.597	53.996	100.736	77.348	9.091
258.933	19.35	6.577	156.445	71.775	-39.821	155.745		-14.634	-88.466	-6.907	156.361	-21.152			-58.733	-3.584	175.127	-159.137	-11.198	90.071	79.027	-2.078
259.067	32.608	12.267	175.428	-17.387	15.088	141.968		15.153	15.641	6.216	0.608	-38.793			66.31	-3.474	130.721	-161.716	9.709	22.577	70.05	45.471
259.2	-18.016	-7.846	131.843	91.414	19.043	100.19		14.41	64.344	-16.926	155.783	6.341			109.886	11.312	173.69	-142.699	76.697	48.976	66.079	-4.563
259.333	22.723	14.089	246.825	71.178	96.756	143.197		99.696	-13.985	-3.896	155.734	16.21			60.243	-14.577	58.35	-155.617	129.297	66.973	119.942	-2.968
259.467	14.001	-31.326	189.063	50.102	115.038	89.418		-84.103	30.366	6.361	3.767	-44.668			65.443	-3.854	147.269	-74.08	122.07	122.167	39.022	12.889
259.6	53.966	-26.017	94.908	100.399	61.46	76.59		13.165	150.335	-8.153	-155.883	-146.975			102.645	8.824	101.974	-117.459	123.056	64.952	94.502	102.337
259.733	60.317	-2.334	106.059	87.395	88.174	145.505		29.588	-73.572	3.762	155.923	-35.682			54.751	-7.85	95.179	-130.635	18.771	170.172	85.465	66.997
259.867	47.655	5.578	129.644	120.986	9.105	39.767		-10.153	42.372	1.762	155.863	-96.204			111.497	-5.271	126.665	-129.388	133.603	94.969	207.995	99.178
260	37.939	143.401	163.576	97.039	-68.069	297.891		11.904	48.252	13.398	311.481	-188.11			126.145	-113.996	293.09	-179.545	167.114	102.898	127.141	69.596
260.133	-20.075	-152.861	130.386	94.069	-29.646	-52.134		-3.476	-31.293	-0.3	-155.819	-214.943			129.201	76.329	75.698	-121.817	150.907	99.746	35.273	20.182
260.267	34.337	46.886	147.09	130.421	202.296	148.039		2.575	122.452	-11.483	155.744	-79.272			200.581	-11.649	239.185	-102.379	142.916	113.244	-125.238	-98.052
260.4	40.499	90.125	91.133	137.327	56.008	97.881		31.102	-93.603	-12.066	-1.164	-28.83			-17.122	-9.578	52.136	-4.945	275.366	77.97	-12.346	26.967
260.533	12.325	67.991	93.22	103.351	-5.363	139.641		23.277	2.116	-5.711	-155.759	77.666			63.414	-5.131	152.689	76.503	165.057	46.92	46.157	19.716
260.667	-16.094	32.728	119.139	110.317	-15.24	121.298		-17.964	-20.019	12.218	155.804	95.27			89.682	-8.032	135.118	5.377	152.088	58.913	-16.297	-8.563
260.8	27.353	74.991	166.083	87.382	3.89	82.473		16.347	-25.706	0.975	156.495	140.979			175.545	-7.987	213.365	14.667	219.332	36.481	47.437	10.184
260.933	36.248	23.395	204.615	125.828	74.802	94.92		5.729	-78.752	2.16	-7.011	114.963			190.593	-44.753	135.945	152.974	161.756	40.353	-4.142	24.112
261.067	13.863	18.535	107.642	141.312	77.789	89.955		3.225	-31.267	3.079	-7.38	176.939			144.916	20.325	116.72	-0.493	148.051	50.755	34.942	36.147
261.2	15.603	63.176	77.357	143.412	140.629	118.526		3.034	-241.536	-12.066	156.114	107.165			99.377	5.824	-2.293	-10.914	104.026	98.22	44.597	105.538
261.333	30.812	30.469	117.476	155.266	259.248	304.106		5.661	-165.105	-14.969	1.106	67.998			106.909	10.783	225.421	30.329	103.1	106.887	55.08	-12.493
261.467	55.572	52.02	90.108	152.735	75.588	-105.473		-7.03	-153.265	17.671	-0.787	59.805			91.438	-2.649	140.549	-4.216	25.506	37.997	170.65	13.24
261.6	82.902	69.403	92.361	159.341	68.167	105.407		9.93	-156.367	-4.843	-7.131	46.184			150.711	-13.632	131.233	-14.234	104.175	46.04	53.439	73.77
261.733	67.421	172.415	35.808	121.927	125.532	114.245		-8.014	-147.668	10.604	-156.059	32.635			98.074	16.198	152.779	9.198	106.035	19.672	-103.403	68.217
261.867	23.23	53.665	120.639	129.557	72.273	129.81		9.744	-171.892	-6.891	0.6	128.054			85.961	54.79	12.258	7.456	25.388	42.078	26.547	141.453
262	39.197	98.299	89.534	49.489	-102.955	83.188		0.965	-152.071	17.361	-155.97	70.342			110.084	6.685	101.101	80.747	14.292	89.376	102.619	108.531
262.133	168.1	59.103	156.149	48.869	-174.859	38.391		9.86	-83.795	-1.28	-466.27	33.194			53.973	-9.37	139.3	33.889	106.518	185.096	5.505	32.244
262.267	-71.156	49.571	137.753	87.276	-276.787	9.376		-6.803	40.738	2.374	-311.668	44.151			56.619	-35.034	173.191	-10.082	-6.459	174.375	30.814	85.436
262.4	43.221	17.883	92.763	135.078	-366.67	9.134		-7.237	-48.429	-18.999	-156.564	16.703			11.797	11.541	195.925	14.786	-9.189	168.937	36.628	38.443
262.533	129.26	-103.707	105.605	134.797	-363.584	35.399		-2.25	-11.259	-8.639	-157.989	64.149			42.741	-21.442	162.816	4.217	-31.24	114.92	29.298	12.722
262.667	72.95	38.717	130.692	173.079	-300.23	153.654		-13.01	87.775	7.151	-2.5	56.331			53.62	9.117	182.825	-8.1	-34.125	159.121	43.567	51.827
262.8	106.014	100.41	97.674	123.798	-334.519	-159.369		3.799	134.422	37.387	-310.797	47.932			47.539	12.335	194.697	18.311	-127.171	142.202	-51.194	3.796
262.933	169.123	89.027	114.248	131.749	-316.175	-34.686		10.595	72.122	-25.44	10.057	46.844			-28.21	-14.174	150.438	14.605	-164.746	126.781	-490.693	30.886
263.067	61.668	99.812	105.841	114.141	-194.318	-16.237		-19.957	160.502	-1.565	-310.351	62.238			47.755	-9.954	167.256	67.465	-61.773	103.867	-266.601	-8.908
263.2	-74.921	95.889	99.595	108.185	-139.984	11.814		12.837	60.79	13.803	1.509	44.594			210.911	-6.327	209.299	99.496	21.9	44.939	-114.238	36.478
263.333	61.302	124.081	115.47	143.892	-152.784	-15.8		-29.136	86.924	-6.09	-155.616	126.467			103.545	-11.806	164.449	73.827	117.383	13.497	-33.545	30.783
263.467	-10.978	136.203	147.755	144.839	-230.487	-17.588		17.493	71.803	11.828	7.295	21.213			155.053	82.118	181.843	58.92	284.678	-13.887	-12.419	18.895
263.6	-0.923	68.136	155.396	143.893	-300.922	-68.939		15.218	79.333	-14.955	155.795	127.657			24.385	7.832	141.824	16.942	64.773	-15.788	12.699	-89.205
263.733	115.633	27.694	125.679	125.184	-285.322	-23.424		-10.692	40.916	18.001	155.544	-0.804			56.942	-19.281	166.38	50.641	65.852	8.321	-27.608	-6.789
263.867	-120.63	25.865	85.393	136.051	-312.217	-57.512		18.393	-13.526	6.515	-5.614	380.75			66.322	2.278	145.036	10.231	144.537	35.238	39.429	118.436
264	158.842	48.252	93.985	276.528	-291.589	16.597		-113.916	-124.185	-11.896	14.615	-8.325			55.534	21.686	134.855	62.746	91.692	60.557	64.049	-56.415
264.133	27.203	-12.702	108.535	136.301	-282.619	-79.043		25.299	-21.166	-9.482	-8.746	-513.107			113.485	28.712	172.487	-65.498	36.233	109.552	38.477	76.233
264.267	46.843	33.324	58.277	147.961	-225.053	-20.948		-164.786	-164.145	-18.162	-18.345	-666.479			211.649	2.592	153.988	36.938	-3.166	105.279	111.976	3.162
264.4	18.741	2.272	117.942	-14.426	-291.587	-27.449		-72.86	-102.148	-8.704	-155.83	-585.345			112.197	46.726	141.344	-18.603	68.038	101.576	76.25	-11.999
264.533	42.714	0.677	177.897	56.742	-70.948	7.569		56.755	9.027	-5.648	7.056	-555.261			69.043	54.864	168.576	119.406	-8.631	118.565	111.644	-12.659
264.667	94.744	6.3	103.426	79.005	-383.666	-16.878		-125.026	-12.772	21.957	-155.042	-415.544			169.044	-5.121	134.044	1.947	2.438	155.294	97.781	20.853
264.8	111.21	23.653	82.362	139.176	-267.378	-44.275		-28.816	-65.825	3.252	1.277	-297.725			151.391	66.232	247.103	21.628	-19.472	126.296	62.63	-5.303
264.933	19.332	-7.801	107.562	71.685	-146.042	-104.048		-2.422	16.024	-9.366	-155.508	-300.455			100.862	35.134	164.218	-5.124	77.379	160.477	29.696	37.278
265.067	37.532	11.657	129.977	95.86	-257.568	-165.861		-26.118	137.734	-135.556	2.937	-204.088			137.036	51.234	181.505	72.953	34.118	149.739	51.057	-87.798
265.2	-8.596	-7.989	140.878	152.568	-206.849	-108.534		-46.238	55.885	-146.283	-157.085	-282.786			224.057	43.905	190.406	-78.151	3.044	50.221	60.567	-7.139
265.333	-10.278	24.851	153.37	73.608	-122.356	-69.775		55.982	-14.231	-77.041	-463.635	-310.53			32.517	11.902	84.856	-29.39	-95.67	189.862	176.72	-2.193
265.467	4.251	-16.526	145.841	116.881	-121.681	2.582		-98.934	159.563	-82.9	157.766	-242.613			62.938	32.537	249.634	-111.022	-287.579	109.616	128.041	19.392
265.6	22.465	-112.51	129.711	126.317	-185.903	-93.003		51.98	35.96	-78.201	-308.152	-346.764			117.429	25.791	167.159	44.015	-228.207	132.781	53.621	3.536
265.733	115.725	-228.322	103.612	114.498	-172.402	-18.481		-86.384	74.473	-93.041	-309.446	-120.992			131.121	0.831	163.492	14.057	-194.243	126.07	15.457	129.741
265.867	-43.299	-257.094	147.621	134.982	-139.069	-11.888		-173.969	80.077	-97.215	13.374	-204.98			147.962	30.743	171.01	41.928	-229.291	81.372	14.839	-111.057
266	-60.437	-235.132	137.986	125.464	-269.611	177.367		-52.681	52.053	-123.356	-4.464	-339.542			147.355	24.099	196.694	59.96	-233.698	53.043	8.336	45.075
266.133	-7.283	-236.704	161.875	81.119	-287.071	86.123		-33.355	40.966	-72.233	3.471	-130.556			106.973	53.709	87.888	29.93	-246.804	30.714	5.941	73.153
266.267	-37.007	-234.24	128.01	61.503	-299.608	98.499		12.172	32.717	-84.276	310.594	-232.702			93.626	31.09	157.221	98.199	-75.306	91.37	-112.818	29.636
266.4	-2.416	-159.3	92.418	30.231	-253.222	39.438		-32.643	23.291	-39.535	1.99	-413.078			185.472	6.376	192.3	29.194	-282.474	83.328	84.043	53.589
[truncated: 1,677 more rows]
