# Supplementary material for: Precise optical control of gene expression in C elegans using improved genetic code expansion and Cre recombinase
Source: eLife journal article supplement (doi:10.7554/elife.67075), 2021-08-05
Supplement: supp [file PLMR+ATR_1s_Raw.xlsx]

## Sheet: Sheet1
Time(s)	T1	T2	T3	T4	T5	T1	T2	T3	T4	T5	T1	T2	T3	T4	T5	T6	T1	T2	T3	T4	T5	T6
0	0	0	0	0	0	0	0	0	0	0	0	0	0		0		0	0	0	0	0	0
0.133	117.708	-57.641	28.167	-19.566	55.977	195.205	-19.567	68.095	-3.208	-26.123	-21.001	59.411	25.626		-12.254		55.272	186.434	-98.355	-11.14	66.784	67.711
0.267	103.829	-33.517	41.819	14.32	77.068	226.617	44.402	35.149	-8.93	14.388	8.333	-24.102	5.851		-135.717		-117.745	115.949	82.302	-29.785	151.562	117.133
0.4	48.001	-12.977	50.536	7.667	73.657	228.141	-15.446	61.142	-14.934	-10.699	31.878	155.028	-22.926		-12.584		9.332	109.651	188.038	17.025	103.099	134.615
0.533	-104.581	-44.37	44.837	-3.134	140.137	143.935	3.001	42.021	-4.873	4.141	24.556	140.706	23.062		-135.846	0	-30.903	121.708	124.709	-6.878	96.951	94.911
0.667	187.218	-2.144	7.75	12.859	85.394	196.848	36.138	18.082	22.956	53.322	34.443	235.741	-23.001		1.274	-386.747	-174.419	54.05	143.59	-29.002	107.123	107.789
0.8	-49.043	25.276	30.117	-15.428	90.331	220.997	19.053	97.403	-3.143	49.559	18.555	88.451	34.97		270.979	-2.323	-251.373	33.832	129.587	32.422	14.926	158.834
0.933	197.982	45.153	-7.815	11.439	122.717	301.099	-5.195	154.606	-6.763	43.459	24.722	59.739	13.191		5.725	-255.462	-91.231	127.952	128.165	7.228	92.465	75.929
1.067	239.119	72.345	4.075	-7.68	64.114	219.718	-14.72	127.456	6.541	37.732	8.181	-62.269	0.383		-269.926	-127.751	-200.16	112.752	161.677	-11.954	128.279	87.737
1.2	105.73	92.13	-3.161	8.549	17.814	183.504	19.473	81.308	30.974	38.303	22.445	12.297	16.643		-135.409	-258.562	-183.269	70.974	144.27	-81.491	95.597	82.433
1.333	13.488	-15.385	-129.028	-19.557	115.595	194.429	28.651	73.618	53.354	44.038	-14.891	193.643	16.864		-1161.18	-37.713	-133.814	25.027	165.495	-122.249	245.428	116.578
1.467	30.046	210.147	120.946	25.415	151.538	221.627	25.682	50.773	50.807	24.277	30.679	55.87	-14.589		-136.536	-131.493	-430.241	322.261	106.926	-109.742	36.855	74.132
1.6	8.963	65.063	20.119	-12.263	138.942	194.109	-3.319	100.072	55.829	93.389	-24.355	12.466	5.337		-136.2	11.478	-274.431	70.439	15.201	-73.876	64.831	151.062
1.733	-3.507	40.59	-14.479	-0.282	129.949	223.253	-29.527	121.795	55.017	73.898	13.377	31.327	-23.331		-135.857	18.813	-109.782	53.089	11.165	-177.796	52.65	81.315
1.867	-3.519	104.015	-11.126	12.334	178.795	229.931	-12.875	66.204	-15.209	88.852	10.311	4.947	25.16		135.988	-16.016	15.649	38.424	64.83	-156.643	39.646	108.291
2	16.203	116.764	-22.375	-22.941	100.365	249.717	30.359	91.379	6.308	29.97	2.192	21.292	-22.198		-135.894	-68.525	183.506	89.889	-3.287	-123.876	52.255	44.44
2.133	5.302	132.338	-27.635	25.161	114.463	221.565	19.189	41.899	11.492	17.625	41.68	-107.159	9.816		-136.271	24.822	164.288	114.098	26.613	31.266	56.364	65.18
2.267	-4.397	102.898	-110.165	3.983	165.453	216.542	11.79	31.906	32.567	9.805	-24.051	23.736	7.902		-21.544	20.561	150.567	81.537	10.398	-158.949	39.787	65.104
2.4	-17.887	86.751	-130.016	17.347	185.354	239.233	-67.801	71.781	-18.34	-10.81	42.128	9.908	-12.116		-136.286	111.502	210.159	116.432	-21.36	13.915	20.32	-17.633
2.533	-31.885	96.536	-91.996	-15.253	180.08	197.171	-30.95	23.04	6.336	15.712	64.039	36.557	23.423		-273.11	37.355	180.952	22.655	61.58	-139.812	1.459	33.819
2.667	47.563	122.531	-127.237	-5.865	186.746	199.945	-81.133	98.63	-17.618	22.14	22.934	137.091	18.479		-138.205	-1.232	106.999	20.36	-5.924	-104.125	24.395	47.166
2.8	16.461	-33.121	-177.061	13.158	191.393	229.722	42.668	22.261	17.004	32.309	66.967	64.281	-8.229		-273.548	-30.411	89.696	139.22	26.209	74.999	15.879	62.597
2.933	52.481	34.344	-251.243	-42.211	200.473	214.228	-45.773	33.044	44.039	-47.686	29.515	22.457	15.991		-27.556	28.414	233.475	76.066	7.134	-7.312	-13.615	58.609
3.067	116.096	69.38	-65.598	30.332	15.286	230.723	53.327	26.911	-51.298	45.534	57.687	36.665	8.837		-136.196	5.425	170.606	121.044	8.581	-159.023	-2.851	87.154
3.2	115.596	68.582	-61.779	21.673	-360.958	181.265	147.873	78.698	-8.044	-13.825	21.669	30.888	7.382		-135.778	-91.599	35.162	127.145	25.387	127.123	14.648	50.402
3.333	59.03	25.936	6.203	-47.135	-190.125	157.59	14.104	37.083	17.984	-13.047	32.342	-9.031	-0.397		-7.304	63.342	84.6	162.058	-48.387	67.847	-7.109	12.747
3.467	106.234	94.156	94.93	18.16	-281.941	134.493	42.913	-20.097	53.784	18.5	24.051	-116.098	1.971		-9.923	-27.862	77.935	98.977	-79.769	54.515	-16.116	35.45
3.6	80.81	12.78	134.695	13.289	-422.271	175.012	45.908	37.771	59.925	57.327	6.24	-4.718	8.763		-6.862	-25.168	39.315	56.233	-156.899	-56.174	18.797	30.713
3.733	146.212	12.428	147.288	10.75	-247.294	292.933	54.02	-4.278	13.188	40.621	-13.122	7.952	9.417		-135.911	-35.297	22.018	67.539	-190.422	141.989	-4.677	54.811
3.867	118.498	3.893	78.196	-8.8	-91.111	136.473	65.816	6.447	-24.951	25.289	31.953	42.55	8.623		136.174	42.255	23.198	46.833	-83.595	32.788	9.168	65.617
4	-27.794	-23.666	-33.47	12.331	-11.126	118.879	135.014	40.234	13.866	-20.639	38.691	64.193	2.579		135.839	65.798	-20.203	18.715	25.131	63.459	-8.943	-4.69
4.133	100.89	-26.681	273.645	-32.702	-46.806	179.613	86.397	-28.226	39.144	48.923	78.697	21.985	-13.906		4.538	209.59	54.285	199.415	122.605	38.128	32.375	36.688
4.267	102.964	9.067	83.497	7.052	145.021	204.442	46.369	6.886	-28.916	22.91	-51.784	14.021	27.235		136.308	16.363	-5.305	115.229	-4.638	199.71	-6.268	-10.057
4.4	99.835	49.172	58.619	-11.104	45.263	201.258	15.772	39.726	35.49	21.206	0.432	-16.756	1.468		-3.164	52.538	10.368	66.52	-6.625	86.285	-13.984	25.946
4.533	146.452	68.811	126.605	-7.412	15.922	147.602	56.443	58.327	-7.616	22.544	140.014	14.215	-20.301		-5.664	29.946	158.095	108.592	-113.356	105.728	-27.269	9.622
4.667	16.434	70.705	121.487	2.195	68.378	142.317	31.13	28.663	29.877	3.176	-8.509	50.973	-15.501		135.915	-18.222	117.862	57.615	-330.943	100.271	35.13	1.544
4.8	146.064	39.436	120.883	9.644	86.606	185.83	12.872	-6.023	20.533	164.635	10.172	115.028	-36.834		5.843	53.523	57.975	65.77	-282.969	80.646	33.005	16.29
4.933	51.779	37.659	120.452	-1.681	53.225	174.643	-9.778	59.33	6.049	2.302	26.75	-146.405	57.294		136.534	48.423	53.919	104.968	-98.541	135.017	124.519	11.503
5.067	15.95	66.323	120.63	3.545	13.369	145.565	-6.276	27.966	-2.988	60.787	-41.3	-29.191	29.786		-136.039	13.381	16.099	80.807	-24.322	135.618	137.869	26.154
5.2	97.052	77.44	11.551	2.843	7.323	223.62	-6.654	11.874	2.884	110.409	-58.087	-5.942	-34.04		135.864	-79.12	39.917	43.911	121.544	50.74	121.038	1.87
5.333	146.749	74.666	3.658	-5.136	31.482	444.086	-18.634	-125.358	120.706	50.259	-39.275	143.105	25.385		135.941	8.175	198.843	16.504	25.854	43.765	83.957	20.975
5.467	115.012	105.441	-1.738	2.148	-5.436	223.429	-7.418	155.888	-98.12	76.94	-33.286	-118.889	38.889		-7.255	13.437	108.688	242.561	43.423	74.657	115.193	118.047
5.6	119.38	153.245	120.583	-5.056	15.46	-5.495	-33.629	24.504	11.183	-6.39	-14.563	28.479	-42.83		3.002	92.482	22.113	76.915	44.624	-32.53	44.243	124.181
5.733	160.152	111.521	121.077	-5.737	-3.493	444.674	-24.054	13.193	-35.547	52.057	15.957	-11.163	-164.962		136.13	-33.971	128.726	60.502	-52.161	93.508	34.364	62.393
5.867	-82.263	92.262	-119.323	14.546	-15.965	1202.85	2.808	61.839	-5.218	32.083	37.811	26.251	-183.448		-135.829	-144.49	194.028	109.292	98.741	55.857	48.044	29.964
6	9.618	42.06	-0.045	-14.579	13.113	1.45	-15.299	48.653	17.144	28.509	14.612	7.19	-257.404		137.374	-141.604	-47.897	58.331	141.954	77.105	16.501	61.81
6.133	13.724	62.752	4.674	8.06	-6.809	114.585	-17.568	80.245	-6.641	28.878	117.38	2.465	-195.621		-12.574	-198.95	172.097	79.808	125.983	139.544	-4.785	72.702
6.267	-28.716	59.101	5.203	-6.636	75.683	-445.256	-21.507	61.411	-29.332	84.647	112.993	56.588	-202.439		5.02	-131.353	45.222	69.302	161.644	138.831	8.945	72.316
6.4	16.61	82.229	-11.306	-18.686	109.11	222.407	-18.566	63.841	-92.037	91.195	20.403	91.062	-130.442		3.879	-221.108	34.493	103.376	127.403	43.487	55.862	118.016
6.533	-28.099	30.462	120.649	-39.869	100.555	-111.137	-3.978	13.281	-96.888	90.571	-47.866	58.49	-53.987		3.829	-265.2	67.314	29.61	131.465	38.563	-15.488	84.673
6.667	-18.836	99.384	1.56	-42.183	197.011	-0.885	-63.004	122.633	-127.065	-18.925	-77.347	143.558	-19.137		-7.369	-200.059	37.595	-32.598	104.439	27.246	18.287	83.349
6.8	-53.871	89.112	120.379	-81.873	247.4	-1.816	-72.347	-22.381	-137.781	240.722	-54.75	-83.518	-16.712		136.077	-215.277	42.102	137.339	143.943	51.992	-2.883	99.201
6.933	-85.746	65.893	3.709	-95.509	130.287	111.149	-97.923	42.365	-92.533	-33.186	-34.431	124.861	-31.942		2.592	-133.224	4.607	60.283	215.334	85.157	-9.416	53.428
7.067	-191.83	96.162	10.769	-45.287	141.564	-111.137	-127.642	4.092	-84.168	43.01	-64.559	42.842	-26.776		19.648	-65.766	118.754	86.478	79.325	52.844	-20.504	97.891
7.2	-208.546	160.123	-3.35	-104.267	84.453	111.156	-159.628	73.523	-39.513	56.985	-57.559	-3.337	-53.984		5.952	-85.823	98.171	90.14	101.945	36.801	5.607	41.797
7.333	-104.807	128.29	-1.606	-88.37	109.327	222.179	-175.52	-52.515	-45.97	47.508	-7.024	-21.439	-48.216		138.286	-46.3	56.306	66.736	122.273	23.379	-8.437	75.844
7.467	-304.859	100.36	1.505	-21.771	168.54	-111.341	-112.457	193.548	-28.236	104.411	70.969	-150.138	-32.695		-5.322	-15.562	99.915	55.613	110.719	7.822	29.318	129.056
7.6	-233.696	86.642	0.619	-12.125	237.916	-7.899	-133.195	88.141	-38.082	71.942	98.441	-44.806	-36.462		22.727	-36.396	-115.746	59.939	50.231	25.034	16.207	31.087
7.733	-249.657	120.115	119.517	-106.238	127.847	222.367	-178.573	-52.563	-77.862	94.351	110.129	-20.878	-44.809		-1.514	-38.035	81.995	34.588	88.124	125.054	22.556	58.818
7.867	-220.958	39.101	3.518	-13.792	235.787	-112.778	-204.423	52.751	-30.104	77.348	136.147	-43.177	19.417		8.926	-24.909	246.138	24.795	27.964	129.645	72.057	25.827
8	-155.721	266.296	-118.977	-36.019	88.649	111.346	-247.897	246.576	-116.062	133.772	58.451	169.581	-11.2		-1.63	-62.541	128.558	-18.901	94.185	75.714	103.338	-24.724
8.133	-124.67	-77.623	-0.301	10.558	182.725	-8.785	-178.471	17.25	37.223	-13.02	147.301	30.539	3.532		135.856	-89.155	-30.462	110.252	84.183	20.187	42.045	13.845
8.267	-168.791	-353.371	7.475	-3.697	212.146	222.626	-202.939	-65.656	-54.42	87.364	-13.352	-109.681	-18.907		6.705	-55.467	127.462	53.027	86.06	48.331	82.334	14.29
8.4	-180.67	-182.558	6.295	-30.163	184.032	4.82	-233.453	-20.72	-69.548	23.232	-14.964	142.785	38.851		10.483	-15.507	132.303	78.826	49.066	23.505	85.362	-27.874
8.533	-148.269	-79.073	2.579	4.841	183.89	-2.585	-229.587	-19.987	-116.619	29.34	14.324	-5.877	9.85		4.028	-37.35	88.676	53.898	-5.224	71.782	92.944	17.679
8.667	-128.077	-49.167	-119.341	-27.129	171.338	-9.071	-117.012	7.418	-5.456	17.639	-7.887	8.492	22.675		5.867	-111.279	82.136	14.222	29.466	131.223	30.978	59.111
8.8	-145.865	-75.89	3.126	-56.586	164.073	111.176	-0.409	36.224	117.058	73.41	-9.319	-24.381	-18.557		135.487	16.954	114.419	21.319	11.371	95.463	63.087	10.815
8.933	-172.976	-102.138	1.303	-16.245	169.229	-111.374	-4.495	27.883	-233.52	91.485	27.435	-59.54	-21.262		-24.457	1.822	77.774	8.971	17.402	227.298	38.839	31.275
9.067	-216.724	-36.397	120.056	-17.092	158.507	111.524	14.772	136.484	-117.286	43.293	-9.112	-126.697	29.301		9.706	-42.676	91.869	22.483	-17.239	-49.236	18.609	-15.304
9.2	-133.931	-80.669	120.481	6.565	248.423	4.261	-4.793	-8.503	-0.35	20.125	-175.155	-22.516	26.985		5.877	25.895	135.318	27.965	31.087	201.629	14.834	-248.105
9.333	-45.274	-113.996	-118.673	-5.427	231.132	111.553	-24.356	126.297	114.612	-1.918	-309.442	16.59	74.901		26.099	-38.831	250.753	130.528	23.465	40.474	124.294	-103.74
9.467	-7.089	-152.718	-119.329	-27.127	225.702		-115.452	-111.415	-233.099	-19.51	-271.204	49.717	33.57		136.476	129.386	-95.213	-34.901	32.669	6.702	-34.218	-40.572
9.6	-16.324	-117.662	120.097	-24.806	158.806		9.175	37.145	11.364	11.394	-91.142	52.457	29.702		46.778	-8.653	159.611	37.275	74.912	-14.226	68.371	-6.981
9.733	-15.479	-87.367	6.242	-20.189	297.742		-115.061	6.344	-21.219	9.202	-151.494	46.745	46.34		136.322	-13.026	136.133	47.252	74.217	-91.401	64.031	22.682
9.867	33.459	-106.301	119.398	-58.775	143.27		-116.026	-9.869	-117.63	17.699	-163.578	-0.909	35.967		5.915	-35.38	170.677	24.928	57.498	80.629	73.562	1.496
10	-6.352	-83.812	120.514	-16.772	229.875		-117.038	23.344	-116.724	63.891	-119.272	36.536	76.203		-15.52	-64.139	179.054	-21.47	204.205	-55.511	83.266	-35.697
10.133	-29.557	-99.828	2.696	-38.414	171.301		-231.491	45.007	-116.902	28.523	-107.791	11.175	51.041		-4.27	-24.109	167.9	26.954	42.222	27.43	31.171	-41.277
10.267	-25.028	-8.699	119.866	-23.253	120.336		-234.319	25.184	-116.189	57.966	-104.945	140.531	74.478		135.589	-22.293	196.718	2.591	63.901	44.235	40.41	-25.565
10.4	-25.36	-76.462	8.37	-33.405	120.974		-120.624	7.273	-116.876	157.667	-98.357	17.899	50.578		-16.275	-19.844	215.025	23.83	21.598	77.884	22.834	-53.4
10.533	15.601	52.801	-1.64	-22.177	201.93		-123.473	12.064	-116.917	41.307	-63.966	12.868	30.232		-10.016	-22.94	146.581	4.058	52.682	77.398	4.266	-82.326
10.667	18.323	89.313	120.475	10.873	203.018		-116.04	13.101	8.986	-135.039	-65.516	152.295	21.555		-9.655	23.156	198.354	-19.95	39.723	209.671	124.255	-184.823
10.8	101.864	80.09	-118.857	-12.568	214.27		9.912	28.65	-20.464	14.62	-15.631	-87.541	65.605		135.813	94.129	134.614	41.137	149.259	-33.787	-110.373	-119.58
10.933	83.082	91.673	-5.382	12.099	238.827		-5.575	38.196	-13.552	7.97	102.971	13.323	-28.165		-3.565	5.683	99.62	-11.922	61.324	210.853	11.582	-88.631
11.067	148.443	63.449	-3.764	70.606	173.242		115.407	-0.807	-233.619	-8.403	7.752	52.992	10.8		20.707	48.649	31.905	2.746	10.048	31.893	12.734	-64.464
11.2	227.056	64.378	120.471	96.414	186.976		1.841	38.343	237.304	10.27	-63.344	65.225	47.206		135.877	-13.409	80.684	-26.33	38.337	88.295	9.209	-79.921
11.333	95.128	79.923	103.565	-5.191	169.742		-116.668	-27.275	116.944	-22.127	128.973	-5.02	36.49		135.527	65.253	181.054	-17.691	30.574	109.179	1.376	-124.228
11.467	98.613	11.442	-243.851	4.998	215.808		-115.463	-20.657	-235.621	-17.298	-25.2	-92.097	24.611		-23.325	112.468	137.239	-36.664	-50.219	229.477	-14.182	-111.069
11.6	42.176	31.629	-245.03	46.632	116.141		-230.908	-8.011	237.156	-5.875	-85.037	1.043	19.465		-7.563	91.928	167.532	15.277	109.31	-12.346	16.039	-190.977
11.733	-113.303	14.947	15.54	40.37	103.147		-115.329	-21.042	-28.701	-3.066	-11.052	15.802	-23.789	0	136.158	65.424	155.875	-24.832	-61.379	43.98	3.212	-182.339
11.867	142.612	19.564	-8.458	-15.02	162.573		115.46	-10.442	17.575	4.136	126.425	-1.281	-0.62	137.272	-136.005	95.622	180.807	-19.889	166.518	107.315	-8.283	-126.38
12	77.359	19.632	125.244	45.407	351.077		-115.69	61.084	117.136	-14.993	-140.75	91.959	1.935	34.407	29.345	79.031	113.777	-18.689	-147.12	254.651	124.278	20.708
12.133	46.229	36.271	-124.042	23.606	227.316		3.733	-32.732	-17.422	-15.618	114.834	40.437	3.648	110.006	13.024	78.4	115.462	3.292	31.886	27.208	-134.281	8.387
12.267	19.582	-10.997	-3.636	47.897	128.212		4.667	-10.453	117.965	44.578	3.927	58.792	-17.269	226.107	27.229	18.082	73.738	40.967	88.476	73.571	16.6	-8.87
12.4	-17.688	-7.84	-7.606	-62.978	218.561		-116.327	9.228	-29.601	187.685	-8.25	44.033	-11.667	81.682	-9.323	21.756	80.766	42.432	105.033	116.447	27.192	22.29
12.533	27.483	78.93	243.185	43.606	260.872		-4.709	-7.411	117.011	94.055	-3.28	61.703	-8.924	96.041	31.45	29.767	147.519	47.559	46.372	53.527	42.871	-7.807
12.667	-75.633	82.349	-123.831	16.737	-17.869		115.913	29.038	-3.649	39.29	-20.439	59.407	-14.83	-22.004	46.941	64.464	189.323	79.876	-120.739	36.152	57.862	9.456
12.8	83.662	-19.571	-1.801	83.724	151.57		-119.538	13.898	-116.049	118.2	52.66	47.751	36.043	17.255	64.072	93.705	133.783	45.197	25.158	112.978	84.346	51.563
12.933	123.441	120.968	-123.572	8.894	-67.972		115.596	-4.428	117.026	15.271	-113.884	62.331	14.916	14.348	65.743	111.09	249.587	53.297	10.756	37.183	71.071	4.889
13.067	114.026	19.824	126.617	9.582	42.932		-1.118	11.816	116.594	47.454	3.367	4.428	-9.383	-7.48	-74.818	118.294	28.52	28.318	-23.204	-57.244	64.37	23.211
13.2	-41.859	15.993	-123.475	15.323	43.461		-0.747	34.735	9.859	47.935	5.37	75.469	-31.036	41.222	142.589	49.405	266.446	-27.063	147.895	-17.462	66.007	33.956
13.333	52.39	39.624	247.127	16.17	46.821		-116.296	-12.054	-4.555	52.162	6.752	142.789	-45.755	142.976	-90.584	54.104	90.249	38.054	-85.053	57.721	123.754	-37.781
13.467	-15.244	-37.474	126.54	7.438	59.182		-5.69	24.71	-14.822	127.223	24.197	-68.504	19.691	74.952	126.938	61.89	199.557	35.153	10.347	-8.329	-16.842	-25.623
13.6	16.082	-31.115	4.672	0.45	101.439		115.491	-10.146	-8.757	25.173	3.8	53.349	-35.818	31.331	33.393	28.386	145.64	38.183	38.668	-44.214	49.998	11.203
13.733	14.909	16.602	122.269	42.707	97.355		115.352	6.712	4.13	27.246	-4.892	125.49	20.742	98.525	7.85	103.393	167.452	11.666	28.928	70.633	34.36	-49.645
13.867	-7.185	144.508	246.768	-77.165	158.744		115.529	15.766	0.672	40.016	108.871	46.769	-35.338	61.497	-28.873	69.983	168.991	58.673	109.221	-30.654	16.576	-20.295
14	-185.928	112.454	-123.74	47.542	91.503		230.777	5.17	-3.86	11.603	18.71	-90.252	25.454	87.882	131.105	13.479	186.061	23.853	26.473	-363.358	112.225	-4.19
14.133	-89.271	199.368	124.211	26.187	149.155		115.995	-43.997	-25.509	82.785	4.413	-35.263	-2.559	13.678	11.105	31.178	164.529	-15.699	40.123	-159.896	66.72	22.029
14.267	-86.868	76.79	124.42	48.399	32.631		-2.076	41.064	-6.104	-63.968	-19.586	34.845	28.329	-16.809	32.798	64.715	119.511	15.708	4.746	-178.692	75.075	31.184
14.4	-190.579	59.393	123.864	17.316	115.767		115.667	-15.818	8.565	147.183	-124.787	21.058	-12.564	-131.961	70.71	30.399	118.447	28.119	23.65	-247.834	168.925	101.389
14.533	-233.628	57.745	0.926	89.557	118.659		231.213	12.807	-117.1	49.7	22.343	-14.504	9.776	2.831	-13.137	69.371	131.126	-48.823	74.639	-28.312	105.355	75.878
14.667	-224.395	-17.004	123.156	-9.109	77.527		237.224	59.219	-14.372	29.533	-53.472	145.396	-11.598	136.794	34.343	72.725	-44.721	-19.757	54.259	-115.543	26.851	45.493
14.8	-40.991	43.343	2.739	22.765	89.042		151.29	8.239	90.041	32.668	161.371	-169.222	-93.016	-118.88	62.542	84.552	78.665	-50.867	72.885	-67.281	41.345	100.313
14.933	-88.041	4.412	123.729	24.921	120.853		51.744	25.851	10.445	117.099	23.452	31.796	-125.404	115.626	22.535	42.361	120.212	-21.906	-34.271	-77.173	20.171	81.561
15.067	22.535	-7.712	-3.281	22.187	108.828		79.555	19.686	-119.71	-35.931	-12.194	33.82	-131.124	68.638	-10.12	47.526	34.622	17.75	163.014	30.372	9.753	41.745
15.2	35.09	13.761	121.51	-23.838	150.574		111.067	-1.991	-24.379	85.361	-0.512	43.457	-180.898	121.815	12.1	39.759	100.3	80.686	34.439	-172.144	30.148	63.147
15.333	99.643	5.512	-5.138	28.382	158.375		81.616	48.284	-25.818	58.536	11.162	54.476	-202.648	120.153	19.681	43.019	128.065	151.381	195.707	116.667	-13.777	24.848
15.467	87.896	9.396	122.722	-91.386	153.309		80.973	30.086	-19.117	47.488	-35.411	56.702	-113.72	90.504	10.182	33.204	140.654	89.421	117.651	-238.37	48.416	46.215
15.6	75.23	12.244	122.508	92.621	110.034		57.405	6.429	-36.216	134.428	18.466	85.372	-111.017	62.827	5.162	17.724	102.904	96.55	67.574	-81.116	-3.324	65.537
15.733	49.916	12.038	123.114	-14.61	102.287		53.961	-33.432	-51.756	-63.862	12.078	20.891	-57.296	72.585	-0.393	33.818	-111.504	60.027	37.821	-272.896	-31.984	56.555
15.867	85.48	23.65	13.101	-21.484	89.451		-20.917	84.437	-4.89	-11.198	31.504	55.858	-43.485	43.383	6.199	47.109	-434.103	34.067	138.223	-175.776	13.786	78.25
16	196.396	28.794	245.724	-114.608	111.391		15.314	30.442	116.637	-145.776	26.931	5.911	-19.464	73.292	64.934	56.042	-337.896	-55.697	23.066	-124.715	131.489	36.765
16.133	46.097	-9.322	-3.179	0.986	131.93		66.684	-36.66	-53.462	147.621	29.437	11.561	-17.046	33.595	-125.186	64.428	-239.752	135.59	25.275	-66.377	-96.694	59.47
16.267	65.333	53.299	4.974	128.819	132.754		19.525	-26.5	2.71	-12.624	-3.543	10.629	22.251	95.716	80.253	39.648	-187.337	30.911	63.225	-47.155	26.934	95.81
16.4	163.784	36.933	123.618	34.695	157.484		-38.504	-4.857	-26.727	11.286	68.214	-0.349	36.446	76.508	23.801	13.869	-71.795	28.129	52.964	-2.792	30.431	99.673
16.533	84.38	44.329	-0.507	6.738	153.448		5.001	64.454	-114.953	11.971	22.54	17.775	101.249	48.946	-29.844	32.476	-133.666	34.5	105.726	28.651	19.049	68.189
16.667	53.503	81.791	123.655	-76.538	142.058		-13.217	45.499	82.225	3.32	27.316	38.376	97.406	24.214	-18.278	276.226	-156.874	26.315	58.495	-2.934	-2.204	74.85
16.8	120.495	71.73	-123.68	-23.002	192.978		-19.33	64.2	-111.703	29.886	16.735	19.046	86.477	26.595	-7.812	34.549	-24.877	26.947	93.216	27.286	-5.774	108.569
16.933	40.117	-74.656	124.358	23.08	137.976		84.21	41.321	-35.524	120.728	20.653	2.908	59.532	40.089	15.495	142.367	-20.239	14.234	79.998	-5.386	8.173	68.851
17.067	12.719	97.477	127.603	33.648	115.769		60.303	14.615	-44.141	-93.895	2.286	15.675	2.092	22.5	-53.153	140.69	70.879	26.864	46.856	4.657	-8.495	74.533
17.2	14.271	201.976	124.949	-13.515	177.605		32.006	4.038	32.215	-22.998	20.267	-7.03	-30.126	5.584	59.773	5.172	254.513	30.193	112.981	9.423	27.353	68.299
17.333	15.3	85.943	66.106	53.076	176.214		88.861	-8.829	-109.1	111.322	141.262	-5.026	52.854	-32.983	-137.625	133.987	157.395	60.019	24.424	17.825	23.035	14.162
17.467	33.547	43.66	79	-4.988	167.451		89.324	22.192	-279.2	-107.876	-140.392	58.343	20.045	-67.116	-26.608	-22.42	84.582	71.273	92.714	38.256	-32.452	114.947
17.6	52.886	47.137	91.355	-33.047	47.777		24.536	14.069	-195.42	115.421	-76.18	23.119	101.296	-140.899	-69.977	-135.044	152.768	97.154	288.582	60.663	-5.987	52.06
17.733	41.766	81.701	39.98	-16.663	129.41		39.692	87.053	-193.456	-1.121	-145.596	20.327	-5.519	-12.107	-23.309	-2.306	134.83	20.222	108.347	103.119	-6.002	29.874
17.867	81.696	75.824	111.776	22.145	100.212		114.197	38.919	-142.208	4.905	-169.508	28.94	34.388	30.624	-118.056	2.703	146.033	49.633	42.553	197.698	9.583	20.5
18	33.523	97.224	36.3	12.124	157.184		47.242	-5.03	-78.521	-102.756	-109.768	-11.309	37.985	-19.965	148.637	927.553	124.282	23.161	-107.525	8.801	11.346	11.022
18.133	58.296	58.426	90.716	-6.608	150.285		57.522	55.73	-71.22	108.024	-120.042	-60.893	49.337	20.262	7.065	-1205.84	69.495	72.476	225.117	136.236	-4.299	44.222
18.267	14.872	2.643	91.675	12.787	136.915		29.075	-29.863	-107.981	-133.51	-122.859	16.759	55.984	12.675	-163.21	-1.557	70.838	60.087	-37.214	120.448	4.915	59.888
18.4	1.138	19.209	52.396	33.211	158.677		66.463	61.061	-85.761	124.343	-98.144	-78.475	58.72	-14.053	-97.883	131.7	57.928	129.14	228.61	128.614	23.429	70.292
18.533	10.885	5.099	77.735	19.211	80.859		62.213	195.019	-66.626	-48.123	-214.262	49.962	87.122	21.269	-69.676	-265.06	8.199	143.753	26.624	128.262	-5.15	23.343
18.667	-7.909	124.188	16.752	-111.683	216.468		69.812	43.149	-95.196	28.716	-40.498	278.963	84.289	-25.043	-40.902	-137.861	7.691	14.565	36.929	121.756	29.893	49.614
18.8	102.129	-101.765	82.267	143.513	114.055		74.009	29.083	-102.628	2.819	-46.224	-144.407	47.67	22.951	-45.939	-79.835	76.24	210.758	-62.14	75.533	-21.545	135.362
18.933	37.488	-63.88	68.165	-11.329	131.56		-7.999	-78.642	-103.267	15.653	-3.266	-75.517	55.564	6.453	-61.592	-27.135	66.162	60.728	13.722	93.147	-51.303	30.69
19.067	48.206	-17.729	99.697	-11.526	89.184		55.587	80.157	-71.521	-25.946	54.641	-63.794	-6.155	9.592	-74.298	26.326	30.171	61.375	119.095	75.001	34.435	48.228
19.2	17.673	12.721	255.733	-24.464	34.591		93.539	118.405	-5.74	-16.054	-65.464	-177.012	16.697	-32.917	67.011	-36.749	20.315	71.996	59.127	147.745	18.194	77.209
19.333	6.614	3.662	140.958	1.462	179.24		46.165	84.918	-12.522	107.736	-11.485	-135.228	-11.736	16.502	12.414	31.781	108.436	99.963	87.561	19.417	53.009	52.412
19.467	89.655	8.532	113.117	12	129.896		18.967	120.707	-34.951	-110.062	17.805	-124.639	18.229	-22.371	9.451	54.736	-46.226	105.11	97.945	84.866	19.784	52.223
19.6	86.49	24.564	138.735	-20.032	167.978		-23.703	150.374	-43.755	16.86	-5.909	-183.355	-3.977	23.098	1.679	42.126	-222.282	98.912	134.344	51.244	61.838	60.175
19.733	-25.925	9.928	62.411	37.11	133.044		-18.662	89.226	-22.398	-9.345	32.067	-207.853	-8.537	-36.944	11.4	-31.314	-233.645	96.908	213.538	117.15	35.42	126.077
19.867	168.733	33.325	10.057	5.821	126.222		25.006	74.176	-35.824	5.38	12.819	-152.577	28.748	16.49	5.616	137.033	-215.382	38.381	101.74	144.611	41.506	63.401
20	79.736	124.129	-125.923	19.621	109.002		-26.629	196.532	116.862	55.156	21.66	-143.166	17.057	2.086	-18.892	50.718	-274.561	-138.723	88.58	182.684	63.1	92.551
20.133	76.681	-40.489	181.959	-23.657	92.931		-64.775	93.537	-62.985	-47.684	47.918	-153.562	9.471	-31.216	-12.186	43.152	-182.722	278.636	77.232	76.675	98.063	68.806
20.267	42.938	49.995	20.65	-8.622	71.644		38.794	55.253	28.089	20.783	30.01	-106.817	16.542	-2.472	-5.262	96.704	-367.086	117.793	85.809	-49.236	34.355	54.566
20.4	113.724	143.452	3.805	0.6	134.506		34.255	77.943	30.391	-6.314	36.993	-126.803	-14.955	2.073	-6.8	139.064	-255.75	112.054	162.603	28.482	36.493	85.203
20.533	53.365	45.845	8.536	25.248	90.727		48.424	51.779	-3.836	23.945	19.967	-114.502	49.623	4.223	33.666	139.053	-224.211	89.429	-25.836	55.776	19.52	71.711
20.667	-34.889	87.874	5.886	-23.47	175.58		122.018	17.982	39.326	116.369	39.445	-151.315	-12.948	-15.728	-157.887	673.072	-87.417	116.171	62.587	42.823	2.639	97.105
20.8	112.047	90.353	3.74	-7.87	176.788		19.582	51.157	26.499	-7.912	40.514	-204.027	-7.862	-10.033	142.538	-136.817	-32.803	67.558	108.558	2.85	37.535	78.02
20.933	54.809	49.915	-0.778	9.939	158.555		-4.898	70.164	70.278	-18.521	32.286	-87.313	18.651	13.834	9.815	402.784	129.462	108.164	23.365	56.067	-3.267	92.156
21.067	6.25	74.073	-5.205	-0.2	147.784		-71.803	33.484	14.945	-13.029	24.658	49.379	34.83	-5.904	5.609	0.192	278.686	121.022	17.864	88.098	8.286	71.9
21.2	-82.649	81.365	-7.333	-10.228	84.521		59.985	59.415	-17.15	-91.255	-3.464	-90.435	10.247	-13.193	87.4	-265.926	96.474	45.867	25.891	62.554	26.888	86.105
21.333	-27.086	32.531	-6.14	-117.29	183.329		97.234	18.021	116.598	19.237	142.745	-142.257	112.057	0.935	-7.078	-137.326	73.076	133.831	42.52	110.615	29.104	63.113
21.467	-11.1	133.115	5.626	134.853	162.482		145.325	67.564	-117.157	-26.56	-85.905	-13.3	94.736	-29.508	7.175	-140.452	206.28	44.1	-40.356	43.682	-33.788	21.62
21.6	61.933	20.813	-10.152	-17.052	131.66		158.853	-14.222	71.902	-8.068	-14.466	-135.125	-10.877	10.069	-18.078	-687.146	-18.954	334.453	44.909	109.093	8.082	77.058
21.733	-84.829	30.636	-2.026	12.09	75.434		151.718	72.115	81.956	97.03	22.561	-78.315	55.213	-59.05	-94.886	6.578	140.387	71.031	-9.379	98.22	12.848	91.155
21.867	-93.742	-2.158	-15.347	-2.621	34.878		127.765	87.572	130.158	-22.052	11.328	-75.758	27.615	27.279	-215.516	132.754	52.911	-109.28	-68.439	13.468	1.66	56.24
22	-168.523	82.233	-11.345	20.23	12.752		82.983	66.68	71.319	-8.835	88.861	-87.97	13.34	-114.056	-148.34	390.601	-12.446	47.65	56.249	56.763	25.02	90.057
22.133	-143.679	205.529	-35.833	1.085	68.588		104.12	22.537	97.734	31.845	51.897	-96.569	-9.152	109.238	-156.146	517.671	259.128	81.906	116.294	72.998	39.146	91.683
22.267	-160.054	70.523	-54.711	9.346	27.689		85.916	56.186	32.661	37.513	113.617	-119.949	-21.397	-89.393	-178.618	128.62	142.848	79.576	68.028	80.166	87.589	91.563
22.4	-181.396	104.171	-43.218	-31.116	100.203		113.832	21.036	75.664	58.655	38.356	-124.114	24.058	128.396	-160.68	256.768	79.478	49.995	93.222	60.088	75.975	101.466
22.533	-165.029	109.064	-40.226	8.109	78.889		87.45	91.477	62.713	62.515	24.087	-123.625	40.395	-3.628	-119.566	-591.552	150.771	31.37	11.737	44.245	61.456	121.96
22.667	-143.768	98.567	-5.593	-115.302	-6.328		72.924	49.767	124.576	-133.067	90.444	-25.734	34.927	-18.859	-75.491	-144.692	114.618	81.257	-5.835	41.9	10.7	134.132
22.8	-251.487	102.591	6.87	90.159	280.509		76.288	13.076	41.745	64.641	-15.088	-265.686	70.316	14.773	18.401	-538.183	76.438	213.941	6.351	74.117	33.359	113.414
22.933	-162.231	106.659	-33.974	32.233	107.998		173.007	76.328	73.294	49.16	58.062	-43.598	11.172	13.912	-84.975	-136.302	101.975	85.85	8.694	91.316	23.636	133.847
23.067	-152.666	148.055	66.75	-11.798	27.537		100.851	41.731	54.989	28.105	47.102	-19.156	14.672	-42.235	-61.483	-12.793	98.127	56.952	21.492	34.023	28.792	79.461
23.2	-141.004	113.5	94.813	33.652	76.953		94.811	-6.156	11.196	23.545	-25.41	-34.742	3.094	161.69	-59.664	10.38	119.178	89.613	-46.806	22.398	22.377	84.196
23.333	-101.551	128.739	4.491	-1.93	-69.435		62.766	11.188	89.367	20.057	71.671	23.561	6.121	-95.137	-33.489	-43.036	109.591	108.622	-8.068	11.447	35.311	76.808
23.467	-196.412	85.102	-18.052	-17.968	249.316		29.941	17.993	41.689	3.954	35.088	69.612	-17.291	145.448	-35.074	-26.443	66.633	218.655	-17.791	-8.216	15.868	124.528
23.6	-258.552	97.81	40.708	-20.181	107.556		54.119	30.651	127.922	10.203	47.516	40.493	4.525	47.737	-106.912	-1.417	114.242	228.138	11.945	-9.852	31.868	83.214
23.733	-304.508	89.06	11.881	33.851	157.508		32.672	29.751	63.072	-4.613	25.581	85.863	21.227	22.427	-59.043	15.973	37.433	53.894	-101.34	34.021	38.792	105.606
23.867	30.111	74.262	140.407	-24.49	109.909		32.323	2.961	53.164	0.904	45.501	23.159	17.102	29.69	-47.068	11.946	54.96	220.152	98.663	57.465	47.887	142
24	-334.678	128.869	19.544	116.07	135.835		-36.898	20.276	117.931	-27.59	88.816	141.176	29.709	2.78	4.07	61.764	41.288	-133.73	-114.76	146.571	-42.337	61.357
24.133	-75.966	-39.504	54.777	-54.007	96.727		27.274	19	-76.52	31.568	15.58	-113.156	23.605	-17.954	-45.473	136.952	25.804	401.635	27.736	57.074	-77.11	102.241
24.267	-62.388	45.881	31.965	19.313	119.204		-19.479	5.801	80.452	2.266	75.869	45.55	23.729	19.989	-29.381		-17.072	76.391	54.297	61.281	-112.236	65.601
24.4	-173.586	107.119	-53.135	139.553	216.937		55.667	-21.911	69.996	-30.015	23.53	102.311	31.627	-10.302	-10.033		51.532	135.986	101.671	61.62	-91.373	109.643
24.533	-260.26	35.144	-148.518	14.75	99.684		6.635	-7.145	14.015	-6.901	53.969	-3.299	-14.486	4.056	-56.985		70.587	330.845	-34.693	103.981	-126.679	105.686
24.667	-252.81	65.726	-144.488	12.918	102.675		-9.449	16.649	75.763	-53.793	38.891	73.441	16.298	17.698	-54.191		0.842	88.467	-66.273	38.44	-32.522	79.396
24.8	-164.26	79.665	-180.642	37.802	58.33		1.349	10.355	73.186	-55.376	18.242	5.764	22.689	4.922	-76.815		52.921	113.788	-174.011	73.684	-115.944	49.265
24.933	-259.244	83.546	-162.787	-1.777	-18.913		13.207	6.169	47.36	-87.454	15.659	30.592	15.531	-8.388	-121.192		68.203	204.735	-339.96	91.037	-146.462	60.499
25.067	-157.718	55.015	-106.188	2.383	-25.457		-36.017	-31.433	39.518	-66.161	55.732	52.381	4.553	12.788	-79.816		-15.295	155.803	-281.923	97.087	-151.048	142.86
25.2	-20.4	62.687	-127.098	24.587	39.524		-8.813	-2.745	55.958	-178.333	29.97	-7.01	-8.469	7.015	-28.002		16.587	136.098	39.685	36.641	-129.693	144.538
25.333	-159.275	29.854	-179.444	-112.832	28.834		-101.321	38.477	36.655	-138.362	30.944	-6.516	33.304	1.563	-92.418		51.213	133.636	-400.367	-12.883	-123.037	109.162
25.467	-59.123	25.879	-89.293	99.349	-22.522		-87.539	-4.102	23.579	-134.278	9.734	48.749	-33.732	-30.201	-97.117		-2.835	81.593	-86.906	182.787	-125.126	80.804
25.6	83.764	43.318	-109.492	24.164	24.935		-102.566	-19.75	47.382	-149.498	29.645	10.037	-12.478	-14.68	-66.17		9.724	103.253	-124.919	80.67	-93.576	105.524
25.733	23.863	18.168	-31.228	9.559	-3.697		-150.922	-28.808	87.034	-101.552	13.798	-108.401	32.496	37.179	-10.908		10.322	165.273	-196.026	94.026	-158.359	121.911
25.867	26.048	22.13	19.009	-21.288	-21.271		-261.944	43.104	32.002	-164.083	40.421	141.082	58.269	13.879	9.38		-14.394	105.781	-198.421	117.052	-92.625	114.008
26	31.712	54.133	-54.124	-10.736	28.166		-213.281	6.681	35.42	-23.612	11.299	-19.36	75.387	4.933	-45.991		-3.824	149.881	-201.954	102.751	-96.322	39.201
26.133	76.172	-61.625	-61.212	24.714	-2.972		-219.886	-21.178	60.352	-71.941	37.355	11.024	125.91	4.109	26.99		29.788	84.315	-247.472	125.81	-16.204	32.794
26.267	21.065	152.751	4.79	-14.54	-80.242		-179.601	38.794	-17.811	-101.838	19.823	3.054	59.618	20.186	-7.19		-9.896	156.339	-194.362	85.688	-22.251	89.41
26.4	42.208	-21.879	33.593	-44.667	-176.295		-185.471	55.601	52.417	-102.504	60.154	-14.746	67.272	2.893	-32.643		11.953	106.849	-131.917	78.624	22.758	69.143
26.533	118.464	120.517	-1.778	126.051	-209.65		-178.908	25.454	53.62	-57.673	81.664	18.013	48.06	3.206	-21.451		2.804	96.265	-95.044	86.017	35.257	105.461
26.667	108.87	115.133	51.573	18.649	-127.902		-131.059	13.295	113.627	-36.644	54.386	-21.718	34.486	29.5	21.494		-29.658	-33.816	-184.589	90.32	18.606	57.002
26.8	150.39	47.507	223.977	-31.573	-80.988		-35.028	18.944	-56.75	87.608	37.647	32.161	36.388	-29.55	50.922		25.338	50.586	-168.175	49.397	44.773	86.094
26.933	187.784	63.15	46.978	-18.447	-2.372		24.791	68.631	27.809	-54.069	63.801	-12.565	-6.035	15.152	30.194		-53.561	50.561	-145.579	78.681	15.584	93.089
27.067	265.225	175.529	21.675	-11.173	19.18		-81.115	22.097	-9.709	-34.035	9.194	41.774	25.08	-12.174	28.792	-4.653	-151.791	50.068	-34.286	103.929	45.371	45.838
27.2	213.203	-42	41.801	40.878	-33.817		-223.459	22.092	20.822	-44.824	46.76	-5.032	-8.675	-3.279	75.833	-72.709	-200.574	141.61	-167.478	56.9	42.016	76.703
27.333	168.088	140.005	38.325	-28.817	30.5		-62.479	10.531	29.506	13.777	16.916	-11.365	-15.203	4.898	51.819	-85.384	-244.552	110.019	57.845	61.864	-8.023	102.622
27.467	246.638	59.957	-19.817	6.743	-95.023		-81.429	-4.627	-5.832	5.019	6.567	2.879	-5.136	17.751	52.362	-76.449	-191.077	108.473	-115.848	71.28	9.685	78.517
27.6	271.763	30.077	-33.68	24.903	148.881		-116.155	3.695	4.303	31.38	19.627	-30.843	39.554	-34.789	53.93	-77.22	-213.038	69.309	52.987	128.999	-173.436	75.634
27.733	281.086	73.443	-30.218	-20.337	23.295		-102.616	29.622	-2.111	18.087	0.777	2.119	-40.04	-63.204	77.513	-114.498	-292.098	54.298	133.974	73.329	17.223	117.19
27.867	203.162	121.248	-77.45	-92.526	69.896		-48.487	23.951	15.802	36.066	16.722	15.914	23.525	-87.626	4.909	-61.19	-411.169	89.415	157.192	143.973	-7.67	43.143
28	169.408	122.045	-136.133	43.757	118.575		-53.554	11.907	11.991	44.401	76.845	-142.504	-33.678	-12.876	-19.705	-44.23	-354.123	18.799	175.592	87.84	2.747	128.217
28.133	192.356	89.148	-149.18	-51.814	183.546		-65.465	30.385	12.143	31.126	4.688	-312.632	-115.231	-340.454	27.89	-41.266	-223.875	262.949	236.164	15.165	-17.085	54.767
28.267	286.1	81.759	-178.794	-15.523	25.168		-33.724	-6.892	-25.774	42.554	63.96	-202.979	162.527	-126.365	-42.686	-33.783	-254.952	107.648	124.452	67.512	10.741	-12.28
28.4	255.959	45.592	-69.873	-4.623	257.025		-16.238	-4.274	-5.972	4.715	7.652	-193.749	-38.247	-139.877	-2.392	32.756	-233.683	175.073	66.398	180.124	46.364	69.405
28.533	205.8	98.065	-133.079	-6.976	104.98		80.53	30.539	38.18	-18.343	46.311	-117.065	37.978	-153.228	19.51	40.441	-297.42	154.69	116.52	-72.75	24.895	120.656
28.667	279.401	83.543	-158.459	-31.812	129.859		18.866	57.59	-5.219	17.58	9.839	-61.997	-25.688	-116.513	-17.675	28.686	-277.261	157.187	93.536	126.736	22.662	40.627
28.8	155.31	161.563	-105.355	-8.847	34.702		66.485	22.238	-2.828	50.945	19.102	-78.118	29.379	-14.521	-25.856	64.115	-298.259	104.513	121.442	74.492	-14.75	79.817
28.933	142.093	8.16	39.395	-8.624	122.195		42.15	-83.945	-12.074	47.049	14.032	-60.847	17.246	-78.861	11.102	4.73	-343.592	170.761	130.227	20.125	-52.023	52.471
29.067	101.364	-25.117	-29.145	-24.055	20.077		20.696	12.316	66.161	1.218	-47.541	-58.065	-28.731	-51.304	44.028	128.115	-264.734	100.367	72.673	2.228	18.15	51.669
29.2	89.464	9.903	34.248	60.992	4.02		35.596	117.483	37.322	33.675	-59.054	-42.416	18.803	-151.902	-73.64	-127.134	-248.551	73.329	94.701	-11.081	-8.092	100.99
29.333	182.948	102.178	63.983	-219.95	-121.625		121.008	-74.23	2.949	-0.76	-21.524	-140.726	-22.347	134.847	137.915	128.572	-245.479	138.121	87.998	-81.856	-17.567	77.324
29.467	160.031	-60.635	173.465	170.419	142.484		61.24	85.524	22.423	25.729	4.32	34.391	-6.826	-67.778	-17.834	-90.905	-245.838	143.939	27.677	108.912	-17.586	150.207
29.6	123.768	112.465	108.978	20.218	46.243		135.662	-83.812	-24.693	-97.626	-13.344	-134.488	44.924	15	141.28	-25.526	-239.65	204.179	120.888	-12.586	18.877	111.358
29.733	97.797	63.494	91.829	3.711	50.488		109.639	17.641	38.668	95.657	49.173	15.956	24.085	-132.977	275.864	-129.65	-225.701	192.44	34.368	-9.552	-3.551	105.654
29.867	155.397	51.596	29.67	26.939	115.458		134.146	61.6	20.748	10	60.472	-27.523	-4.593	137.477	-4.399	131.647	-275.232	88.227	127.321	8.341	16.288	94.096
30	174.858	27.122	74.685	37.771	17.492		162.672	130.567	-4.183	55.622	149.614	10.506	-14.025	-134.14	28.403	6.623	-275.915	33.971	16.148	7.088	40.742	101.874
30.133	166.097	-105.991	128.674	21.545	30.4		28.197	9.017	-29.057	35.24	-9.875	4.894	12.302	-132.782	-18.515	133.159	-286.575	282.12	-30.668	5.5	38.093	107.489
30.267	160.43	89.697	43.348	-76.137	110.102		106.686	-12.262	-14.52	64.227	43.308	82.323	17.865	10.127	-15.976	47.768	-280.124	2.619	14.637	101.346	54.343	84.497
30.4	84.243	-153.344	-4.946	111.209	-28.249		40.335	28.634	16.548	61.301	35.709	48.973	-11.08	5.738	-138.147	-45.094	-344.151	159.843	20.816	93.61	27.998	107.135
30.533	103.935	-77.967	10.046	9.783	120.919		117.756	-14.707	39.346	86.111	-2.135	65.22	-1.202	138.601	5.544	-111.511	-185.42	158.772	13.059	119.339	214.775	85.358
30.667	50.829	-77.893	9.03	-113.459	41.792		61.489	32.037	-26.944	86.584	-14.294	144.447	-18.676	144.076	17.752	-147.133	-21.946	137.417	33.218	75.804	37.397	127.138
30.8	-25.199	-111.219	19.305	86.592	-37.55		107.325	-11.92	42.372	65.672	36.179	-39.8	16.55	-136.872	138.656	-117.831	13.859	161.923	79.509	88.442	57.055	17.345
30.933	-0.784	-64.958	122.88	19.763	45.433		80.359	12.849	44.186	53.721	-14.169	44.903	-7.065	137.063	-11.304	-128.334	-7.744	141.21	49.688	11.48	15.156	83.909
31.067	85.781	-69.812	160.981	-34.092	105.601		144.897	-28.145	47.465	61.612	19.671	52.527	-23.851	168.019	-86.785	-121.878	92.023	163.037	170.957	89.013	16.215	58.987
31.2	71.193	-193.205	155.337	-66.724	115.695		169.107	2.715	28.866	101.66	-27.434	14.556	35.017	18.312	-44.705	-84.326	161.21	159.262	2.283	77.34	78.831	59.327
31.333	86.473	-309.369	101.741	14.275	89.653		151.866	-2.849	16.392	47.257	-76.529	81.499	-2.346	-37.476	-9.894	38.716	96.018	113.085	126.353	85.991	-13.773	64.016
31.467	139.446	-126.168	-50.327	34.139	31.906		126.78	30.104	40.154	50.55	-75.377	51.09	10.57	54.24	-113.211	-30.567	126.488	111.161	56.098	62.86	38.408	94.112
31.6	166.88	-172.404	103.876	22.292	82.566		206.391	9.543	31.046	65.432	-136.032	47.855	12.643	122.925	122.379	-16.338	176.387	66.387	114.813	24.581	5.51	102.003
31.733	144.725	-277.596	86.506	22.265	24.631		23.097	-5.316	36.425	42.418	-109.076	59.785	-23.416	-22.488	-43.596	-54.724	102.882	41.773	32.313	76.328	36.808	81.361
31.867	162.667	-143.504	100.895	-20.042	-12.561		68.797	-26.639	163.18	12.129	-122.761	41.474	19.826	-6.292	-146.163	-20.189	104.829	25.635	-23.966	51.159	-18.607	133.772
32	116.024	-121.052	128.417	-2.436	18.856		210.791	-6.594	48.209	-37.688	-119.335	108.173	9.44	136.014	-135.787	-31.991	65.186	-3.259	53.947	-34.857	25.499	135.363
32.133	158.69	-204.642	55.353	109.136	60.118		62.074	-27.311	5.519	-7.758	-156.17	71.705	-9.918	-87.344	-163.961	-37.08	145.186	122.796	-1.543	180.779	44.395	113.614
32.267	124.454	-165.353	71.388	-4.178	37.874		81.582	-67.414	7.436	19.012	-118.003	75.615	-18.846	-36.29	-140.842	56.267	62.072	119.354	75.096	-24.955	-6.859	111.88
32.4	86.834	-32.457	42.291	-54.028	41.749		29.372	31.888	-89.931	20.059	-106.667	80.424	10.517	-66.341	-105.044	65.113	-19.136	148.578	43.938	132.735	33.722	130.352
32.533	74.154	-121.533	40.761	-11.743	24.469		163.104	121.354	115.088	53.44	-97.522	120.968	16.561	-208.126	-68.977	178.859	-17.29	146.059	36.419	-59.342	11.188	108.219
32.667	16.291	-180.28	120.144	-64.312	29.421		-24.586	-82.889	-10.174	6.787	5.237	70.82	-9.697	-144.53	-51.472	27.649	-87.098	145.025	50.504	133.846	3.545	129.584
32.8	4.39	-20.394	55.178	111.731	34.954		47.282	45.377	-14.274	-17.176	17.969	106.469	39.285	-161.619	-138.059	136.239	-71.825	109.223	129.734	44.418	16.683	114.263
32.933	8.149	53.961	24.07	25.482	9.188		100.358	113.445	-6.527	-12.257	8.521	69.202	-7.237	-144.641	-124.643	-11.805	-17.581	254.346	14.073	98.203	51.892	173.384
33.067	-25.804	120.043	69.371	-7.103	128.17		44.418	48.918	-45.131	29.096	7.235	133.07	-12.689	-137.52	-106.201	21.816	177.984	165.939	61.887	83.772	9.595	72.556
33.2	-13.741	58.654	67.794	13.186	153.983		30.405	61.509	-85.895	16.535	5.19	81.6	28.61	-160.734	-100.033	270.825	82.219	164.448	-24.192	101.621	41.457	183.245
33.333	49.444	83.474	88.294	32.831	95.759		91.628	25.643	37.795	15.102	-13.885	26.6	-13.367	-135.892	-117.928	2.309	54.348	19.415	-70.607	86.401	50.304	252.929
33.467	-40.305	102.712	65.241	-14.584	134.945		119.317	-10.526	13.596	24.717	-21.849	19.023	-33.085	-319.535	-110.818	2.333	200.773	174.471	9.349	81.624	139.992	59.265
33.6	2.91	71.566	119.126	-18.585	115.838		72.455	153.105	-47.225	-16.703	5.685	46.783	-32.46	-170.144	-91.016	138.159	125.292	273.955	211.645	93.523	125.413	130.812
33.733	-44.456	148.889	68.723	28.952	76.104		55.048	65.193	63.246	23.938	12.818	78.227	4.633	-139.892	-50.512	138.822	55.861	-44.849	-145.212	93.142	91.192	117.135
33.867	-61.531	85.696	67.539	-8.632	98.229		64.662	12.943	-28.836	27.453	5.547	87.491	29.702	-161.446	-50.585	136.803	27.96	229.189	55.597	119.935	64.446	138.687
34	-45.211	187.953	34.615	-37.802	70.931		-5.817	12.231	-18.902	56.737	-21.049	121.615	7.898	-193.891	-23.053	272.262	80.205	39.829	53.799	50.317	28.261	136.453
34.133	2.916	124.923	69.973	-24.509	87.521		-10.715	18.117	-12.561	-21.321	-3.961	123.537	-8.199	-73.726	8.908	9.89	111.773	260.611	60.463	106.356	33.474	122.153
34.267	-5.602	128.828	39.255	8.897	106.524		22.334	-2.547	-69.266	-89.594	0.66	226.013	-19.764	-46.231	-17.624	270.142	84.705	115.53	17.596	88.376	34.373	70.548
34.4	-35.739	96.474	37.583	52.21	78.261		-17.473	5.173	-8.076	7.591	-8.34	106.559	50.197	-62.385	-13.832	269.917	23.478	105.522	14.276	119.789	-12.821	58.061
34.533	-29.294	141.528	90.856	25.833	98.936		-17.482	7.355	104.316	111.028	37.489	97.363	5.27	-57.346	68.141	-748.858	27.438	115.795	50.008	69.878	17.857	13.354
34.667	-168.443	55.085	104.412	20.178	93.925		-17.084	-11.831	-8.211	-9.522	6.308	143.566	-15.32	-22.024	-11.588	-133.422	-27.057	42.399	-6.716	71.764	-36.543	127.251
34.8	-156.983	216.157	97.392	25.457	98.99		11.87	-17.945	10.789	-51.161	-29.323	-74.949	-15.175	-90.068	7.95	131.812	-159.554	233.012	90.886	46.218	36.46	29.165
34.933	-145.939	108.187	71.461	-24.148	74.399		9.106	22.982	103.087	-33.637	-14.254	62.403	-1.705	35.438	89.748	-132.515	-288.537	130.433	2.604	76.742	8.598	106.155
35.067	-95.741	88.151	94.251	12.238	84.534		0.948	10.865	-12.979	-66.24	2.979	70.6	-18.048	-18.222	-17.867	-11.232	-349.602	86.685	80.137	89.883	-6.647	141.555
35.2	-205.416	66.51	53.788	17.158	125.621		14.788	-10.999	-88.052	-32.455	15.328	32.319	3.759	-55.472	29.278	131.792	-365.968	169.955	20.536	70.375	37.875	130.652
35.333	-175.322	94.531	126.625	3.815	38.329		-31.816	4.32	105.554	-10.696	-21.388	48.709	-79.95	20.684	70.885	-130.642	-225.278	129.978	28.408	159.017	-18.355	195.265
35.467	-92.583	114.952	62.733	23.306	149.243		20.846	48.309	-111.23	-25.746	8.825	-71.79	-152.439	-23.567	50.777	390.501	-170.483	185.179	46.369	-22.396	49.371	137.859
35.6	-96.979	118.64	61.644	11.856	112.571		-9.327	-21.942	-8.131	26.566	-9.237	126.08	-163.157	-10.623	28.636	13.327	-166.253	79.912	-21.889	41.306	10.639	75.533
35.733	-57.737	120.338	69.716	23.663	78.366		28.57	-15.433	-4.204	-15.224	35.275	-56.506	-60.006	74.324	54.654	-130.489	35.704	201.594	162.846	92.705	-6.54	107.964
35.867	-11.249	109.262	48.679	2.844	170.496		41.056	-12.83	-51.691	-35.326	2.59	28.287	-36.582	138.063	4.821	-36.295	69.485	116.836	89.223	73.062	-4.233	127.167
36	24.374	127.072	17.33	12.912	155.151		65.079	-18.385	-37.884	-34.897	35.663	149.956	-71.144	136.055	-10.822	-510.9	24.915	273.811	40.917	21.235	42.452	-8.804
36.133	41.715	34.446	-40.407	-16.561	91.993		16.753	-74.334	66.733	-11.015	3.731	-93.616	-66.703	-107.393	22.295	-392.872	84.203	90.621	32.756	48.716	138.785	193.795
36.267	66.69	175.434	-8.348	14.628	91.43		34.822	108.812	8.651	-13.379	-18.16	81.982	-58.349	19.949	8.551	-192.215	83.737	114.829	69.667	14.519	22.819	85.439
36.4	37.243	-71.371	24.572	16.758	136.348		28.297	22.565	-7.414	4.901	-22.267	207.036	-98.139	-126.415	23.111	-157.473	-4.698	154.268	39.784	44.406	-103.135	61.303
36.533	52.76	80.849	58.447	14.113	129.725		28.016	12.685	-2.551	-5.446	-8.838	14.879	-56.452	-280.815	27.224	-132.604	-24.482	106.397	-10.689	20.5	-45.134	62.802
36.667	62.141	109.565	100.71	49.113	133.016		28.296	-6.182	-6.983	-13.601	-15.042	7.398	-18.366	-256.914	-15.245	-164.694	62.855	102.225	-5.61	41.005	-8.836	110.229
36.8	57.504	75.432	185.11	6.6	98.625		-8.876	4.735	-90.779	-131.471	-14.803	-4.088	-13.036	-291.808	92.692	-105.223	47.636	119.679	-205.022	93.655	21.425	82.232
36.933	19.71	141.571	107.752	48.841	13.421		5.002	-13.292	12.837	-123.893	14.327	27.244	-11.285	-70.224	31.828	26.003	-57.975	95.443	36.914	64.904	-11.08	66.232
37.067	43.335	-64.997	72.777	39.275	192.179		155.322	12.368	22.695	-70.985	-24.399	-8.84	-22.938	-101.138	55.674	27.758	73.35	126.619	229.659	56.416	9.242	84.299
37.2	19.118	-19.474	88.672	1.443	63.304		60.352	17.947	-15.305	-128.201	10.111	30.927	-11.014	-41.914	34.953	104.365	74.502	156.286	-44.139	101.216	-3.764	120.21
37.333	28.519	4.585	-13.221	7.918	169.979		44.722	12.063	7.153	-127.664	31.59	142.194	-16.229	132.066	57.802	58.648	108.12	136.77	-14.638	114.642	4.869	-17.37
37.467	53.731	21.225	99.757	23.877	116.566		5.072	-12.485	10.056	-76.852	14.274	-173.342	13.041	-115.274	63.994	60.85	82.342	100.612	18.991	194.38	-12.767	142.007
37.6	-41.014	-29.528	57.48	-10.788	32.225		9.255	5.753	-74.309	-105.86	35.933	29.085	-46.976	15.909	15.612	116.839	213.076	240.475	-104.992	91.027	7.54	68.821
37.733	49.148	12.033	31.592	-3.958	202.419		-11.545	20.859	-4.382	-123.622	13.164	92.815	-30.372	53.974	11.379	68.599	207.331	108.604	70.761	51.654	4.412	49.843
37.867	-21.307	20.952	-18.087	20.601	129.588		53.367	13.179	-29.477	-127.155	1.762	68.019	-58.178	-111.554	21.525	84.621	284.496	150.083	12.475	75.61	4.579	82.855
38	-32.025	-32.239	-9.609	-6.424	154.301		14.441	46.596	-17.71	-105.302	28.704	119.676	-94.291	-5.201	22.865	56.215	202.43	167.369	-135.042	-39.469	3.004	108.855
38.133	-132.484	23.474	-7.05	10.87	129.145		27.102	66.693	20.849	-113.065	16.613	44.365	-41.379	87.254	16.775	116.061	62.586	165.622	38.106	175.428	2.108	40.259
38.267	-159.51	-5.665	4.756	-11.679	67.32		12.019	61.71	-28.503	-32.902	59.654	14.468	-75.122	-6.038	-5.269	74.123	123.053	129.422	-70.385	73.126	-26.375	79.176
38.4	-134.063	-2.532	69.53	-7.531	41.541		23.164	89.595	32.423	-148.318	44.527	38.851	-119.204	-6.7	24.717	97.997	-7.557	-10.721	-118.732	87.622	26.49	46.59
38.533	-223.295	5.309	125.935	-28.64	23.16		18.525	51.16	36.293	-48.328	29.495	156.63	-108.48	-3.322	33.198	52.253	102.23	110.793	-422.324	-1.541	-28.592	76.266
38.667	-210.432	23.797	129.801	12.035	-69.725		-6.096	33.81	106.845	-64.152	29.755	-12.416	-20.15	-5.974	75.006	30.943	-236.117	30.047	69.081	110.752	10.911	68.781
38.8	-209.468	-28.709	143.517	19.309	11.576		-23.963	42.571	23.62	-23.012	12.27	19.094	-109.955	-205.413	81.423	52.808	-380.709	346.231	-487.008	105.252	10.07	17.905
38.933	-148.216	32.111	116.101	19.168	14.963		-9.463	22.998	3.939	-77.365	28.116	23.844	-47.245	-133.331	-0.547	29.217	-302.94	166.908	-143.172	102.194	17.569	58.385
39.067	-169.499	-22.042	98.676	-5.767	70.387		-3.473	2.796	64.822	-39.399	24.233	-9.249	-33.353	-136.331	135.886	91.904	-233.065	102.024	-162.423	115.432	-6.197	58.037
39.2	-115.807	50.797	70.755	-17.913	2.055		-12.538	-18.629	27.7	-49.536	59.728	-11.002	-19.382	-267.394	0.904	-47.859	-172.054	-19.972	-196.041	112.464	-9.499	62.159
39.333	-92.389	46.29	75.427	-64.334	-12.488		12.199	5.564	36.422	-60.132	69.628	39.848	44.194	-21.431	-7.411	22.096	-322.193	116.577	-135.704	72.453	84.056	70.269
39.467	-151.964	35.964	13.648	-112.51	-117.093		-29.281	12.823	-7.76	-94.452	87.541	-25.482	7.341	-134.588	135.907	-32.167	-308.258	61.896	-129.857	99.024	161.783	83.192
39.6	-132.665	-74.59	-9.789	-150.489	-21.884		24.495	65.382	2.112	-53.265	22.677	34.741	-13.182	23.503	5.258	57.549	-339.266	137.249	-241.409	200.494	126.95	28.196
39.733	-221.235	135.813	19.998	-109.481	-55.495		-24.755	-4.893	-17.157	-71.952	58.788	48.915	20.034	-9.55	135.76	147.16	-283.922	151.015	-220.951	53.256	91.177	32.729
39.867	-200.15	-4.899	142.504	-93.819	41.98		-6.011	-9.5	-42.519	-55.826	26.551	25.231	91.005	-133.417	-135.823	18.863	-314.024	145.161	-186.523	56.207	137.465	60.296
40	-249.347	14.843	-129.357	-84.633	-65.991		27.161	65.076	-208.912	-10.683	44.99	35.362	4.059	2.987	136.168	37.021	-464.661	139.94	-170.663	56.195	82.025	137.005
40.133	-257.761	6.015	21.445	-129.808	-188.526		33.014	33.441	-150.552	-49.729	-12.597	44.917	14.835	-5.843	-135.93	73.423	-274.895	148.877	-189.982	178.836	45.451	59.011
40.267	-238.679	16.552	201.123	-80.934	-38.409		43.682	-15.929	-156.921	-23.047	23.688	23.702	51.938	-12.088	135.864	98.259	-249.713	132.112	-196.954	162.832	63.178	111.278
40.4	-114.605	-4.055	57.742	-71.486	47.967		31.759	59.416	-99.736	-2.245	50.247	113.051	-10.47	266.027	-136.034	72.642	-242.898	107.083	-141.565	152.135	36.548	120.027
40.533	-25.408	-1.61	-9.809	-71.469	-54.455		22.56	-16.895	-125.678	75.121	13.145	26.853	-38.326	132.403	135.884	69.562	-281.087	124.141	-58.174	137.223	45.89	79.464
40.667	-3.914	-15.862	95.479	-87.325	-79.203		-23.185	-16.776	-78.175	-11.787	31.46	92.155	21.651	3.545	-135.891	34.204	-204.151	151.984	70.421	159.939	49.484	74.924
40.8	39.118	-46.212	95.567	-50.377	-19.336		-17.486	11.747	-160.061	34.041	-1.963	23.381	78.301	270.158	135.887	16.418	-178.709	111.533	-102.514	87.465	70.005	62.192
40.933	100.686	-113.208	53.742	-42.526	-43.212		19.617	25.259	-93.319	-0.922	34.981	-102.08	96.377	-447.061	1.032	27.594	-148.699	120.984	75.617	145.546	19.389	170.961
41.067	144.983	-163.964	126.061	-21.947	78.636		12.064	-5.746	-42.913	27.39	26.203	32.273	66.971	569.835	196.842	43.305	-152.381	75.985	-20.783	148.18	25.4	69.479
41.2	170.103	-209.729	73.445	-22.86	-2.372		8.337	-2.759	-101.091	38.061	46.794	2.595	25.215	103.548	71.395	30.391	-176.115	47.606	27.712	207.827	35.431	50.9
41.333	259.175	-189.563	134.074	-18.967	64.741		-3.779	12.818	-68.635	29.102	63.071	171.609	96.5	67.031	57.015	15.988	-83.537	134.081	7.68	174.012	-17.688	12.192
41.467	57.579	-185.149	55.375	-14.854	82.713		15.913	-17.972	-160.285	-44.153	28.758	5.07	63.242	84.204	15.601	88.119	-118.869	19.329	-25.258	101.708	15.73	20.103
41.6	235.66	-226.266	118.538	-8.319	64.96		-9.69	13.308	-112.528	60.809	63.454	-114.505	11.359	39.754	10.139	15.565	-183.889	70.025	-189.422	116.504	5.154	35.842
41.733	179.378	-186.941	67.054	-3.857	33.399		45.548	-31.998	-122.392	64.613	43.485	15.344	23.519	39.314	34.131	15.773	-198.458	12.584	-276.608	141.577	2.015	105.381
41.867	-16.789	-159.263	75.698	26.99	100.713		21.491	-17.204	-127.811	45.225	48.034	17.93	16.607	41.285	70.304	68.89	-209.137	32.508	-216.736	122.246	-2.469	113.51
42	227.179	-152.656	41.306	10.809	66.071		-11.822	28.573	-163.046	20.268	42.999	2.681	58.893	54.933	43.401	47.131	-136.026	55.279	-186.215	45.316	27.07	153.962
42.133	144.838	-138.166	57.694	8.454	41.742		-5.843	24.386	-112.023	113.27	19.231	20.374	-8.271	92.949	4.889	56.621	136.305	16.152	-140.959	58.798	-25.007	100.461
42.267	-17.373	-198.201	43.731	17.279	102.785		18.305	17.804	-146.366	74.163	-15.658	7.457	97.33	80.773	5.513	34.706	64.052	22.531	-58.01	48.969	-29.696	141.367
42.4	88.546	-109.045	1.321	-46.864	229.558		-41.462	-42.05	-108.463	33.108	15.767	111.337	15.368	66.88	3.356	0.521	88.367	101.92	-216.167	97.282	38.208	173.278
42.533	66.94	-107.666	60.486	-39.475	123.026		29.628	-20.189	-134.514	16.162	-5.177	-19.016	77.57	78.729	9.051	5.778	78.024	57.879	-146.931	81.927	-12.587	139.515
42.667	119.159	-95.32	44.329	7.795	116.688		-18.49	-51.534	-86.668	7.543	9.264	-9.264	21.332	24.283	-17.457	26.773	131.152	135.057	-236.769	86.353	124.044	107.165
42.8	101.624	-133.286	79.228	17.894	112.257		-11.37	-33.586	-14.749	-1.733	-3.792	39.362	18.92	27.805	6.214	44.369	167.385	-95.216	-61.377	51.649	-82.16	99.875
42.933	146.589	-126.826	74.263	19.349	73.503		-40.231	-38.907	9.986	17.378	-6.138	14.011	-9.918	42.451	5.651	47.161	182.889	14.952	52.421	105.449	34.503	102.416
43.067	107.476	-136.924	87.663	-8.379	81.068		10.907	-41.947	-36.89	16.558	30.371	-139.547	8.262	62.258	-21.751	38.106	172.473	-84.087	177.507	108.225	43.354	82.976
43.2	73.457	-159.72	97.423	-12.701	39.997		-11.022	-9.671	41.267	8.448	31.927	-24.089	7.149	90.896	-51.944	77.288	56.727	56.452	215.429	22.542	3.224	66.646
43.333	84.786	-146.395	51.957	-28.735	86.806		-71.015	-52.484	90.037	9.599	53.103	34.669	-11.136	98.003	-120.065	17.024	93.569	-52.567	116.961	70.277	3.607	66.135
43.467	168.422	-74.031	31.854	-3.365	59.394		-50.501	-65.978	77.801	8.183	41.718	-39.411	-8.206	111.427	-199.822	46.39	142.862	-167.846	157.155	78.699	24.252	60.742
43.6	-43.465	68.421	16.382	12.46	86.43		-49.742	-96.847	44.313	18.214	28.87	-28.103	23.886	107.921	-247.958	56.877	39.381	-194.924	118.641	100.298	-21.248	53.606
43.733	83.404	18.172	12.338	15.155	52.095		-35.433	-79.627	38.182	7.524	13.289	111.623	11.935	123.316	-216.783	16.96	98.795	-254.633	81.983	38.571	-4.131	81.44
43.867	49.931	-80.139	64.392	-148.136	41.143		22.651	-143.248	43.81	-16.734	17.897	-5.472	3.947	105.727	-268.282	103.706	85.428	-255.496	155.546	89.5	5.68	40.783
44	97.299	31.434	130.753	-74.311	-122.681		19.676	-112.249	57.173	-6.617	41.008	-10.467	18.115	84.777	-134.47	73.715	-7.464	-411.437	132.823	56.974	41.816	91.182
44.133	81.476	52.733	-58	-56.183	159.15		71.432	-86.634	85.155	-5.904	-25.271	29.289	14.752	131.235	-83.921	27.947	69.207	-50.322	95.589	123.868	-152.374	37.822
44.267	78.233	185.767	11.94	15.216	15.112		55.747	-79.606	19.737	1.874	19.775	12.439	21.125	133.127	-126.924	58.174	96.449	-183.75	65.939	116.284	-106.48	58.12
44.4	151.367	-33.035	39.699	-30.96	26.968		142.289	-76.673	140.628	-2.164	141.253	-6.758	3.54	120.819	-136.324	12.016	153.029	-189.288	71.384	101.053	-80.513	44.574
44.533	114.688	5.752	10.844	-81.522	12.696		43.839	-94.622	102.974	4.323	140.637	42.322	-24.204	30.233	-7.653	61.81	94.353	-218.154	82.584	136.712	-244.778	13.072
44.667	118.656	-19.599	7.111	-49.237	-4.381		49.91	-111.879	70.096	-22.737	-333.95	33.887	20.824	23.135	-266.189	-2.116	158.953	-80.796	102.788	136.923	-25.385	-10.623
44.8	70.419	-15.737	5.634	-51.832	-15.814		97.15	-116.341	38.133	-8.01	-39.2	60.225	75.784	-11.737	-24.803	3.06	59.46	-176.292	112.571	98.207	-160.112	16.293
44.933	62.956	-30.276	18.355	-52.018	47.307		45.008	-87.068	71.182	19.051	34.563	97.494	-59.242	24.369	-33.266	-25.323	45.397	-104.619	126.517	57.769	-123.125	-11.813
45.067	153.716	63.285	-14.267	-19.703	-53.834		50.031	-85.793	-34.65	4.707	39.964	170.194	35.409	-20.403	-4.702	-15.299	93.209	-31.095	90.176	103.103	-128.817	-8.458
45.2	127.847	-83.483	2.404	-27.839	71.126		53.41	-73.173	115.858	-6.675	152.901	-40.826	-50.828	47.594	-74.406	-48.244	55.322	-25.097	91.785	91.958	-151.768	6.603
45.333	139.356	-41.975	-130.931	32.158	-120.137		49.423	-36.324	73.387	-23.464	156.134	53.638	54.427	44.212	-72.629	-105.805	26.929	-133.184	155.382	145.039	-130.256	18.316
45.467	126.829	37.513	100.891	-5.21	232.125		38.974	3.438	98.569	-2.058	39.842	40.14	-19.82	66.517	-35.234	-123.824	-41.618	190.708	146.421	-12.247	-153.794	8.918
45.6	120.626	62.349	-8.909	-8.815	115.937		37.255	-65.029	98.752	-4.971	28.234	45.453	-36.227	83.563	-85.029	-147.268	28.618	40.523	73.603	212.014	-179.587	-9.12
45.733	91.822	63.136	-20.503	14.965	27.897		12.379	-60.479	87.972	14.676	11.319	35.401	-7.235	106.907	86.169	-103.027	52.735	149.049	83.101	-30.741	-145.743	-11.332
45.867	59.017	-32.543	15.566	43.317	56.854		32.921	-48.526	105.452	46.572	28.612	77.136	39.552	37.241	-117.169	-145.097	72.905	73.586	-15.756	123.743	-96.402	32.667
46	54.354	-16.78	7.198	46.881	86.694		-3.652	-48.349	38.442	42.198	36.21	124.574	-9.734	-16.443	131.759	-146.297	113.247	73.911	-19.33	110.453	-139.866	19.559
46.133	119.872	-15.805	18.674	-15.851	125.48		15.413	-33.545	58.051	-4.917	53.455	-91.922	42.1	-164.419	-19.09	-197.44	49.147	69.458	24.972	67.875	-143.316	97.308
46.267	105.737	-164.623	81.797	27.624	87.277		61.84	68.476	86.66	13.792	15.502	12.531	-26.778	-129.469	13.557	-184.526	30.896	89.105	76.422	70.278	-97.18	53.736
46.4	106.501	-83.919	9.598	28.413	42.088		72.365	71.466	61.109	46.298	8.356	27.729	42.487	-26.247	17.297	-196.864	6.812	99.199	71.407	71.138	-33.787	46.867
46.533	147.235	-105.985	45.268	25.675	16.972		100.972	18.146	100.094	4.836	-53.139	22.535	38.004	20.119	97.761	-138.27	50.862	126.051	86.32	62.679	5.684	189.416
46.667	169.101	-63.181	12.296	89.002	-27.349		98.123	-42.813	70.632	10.734	-47.969	-7.996	-34.632	115.522	-161.773	-194.449	131.839	135.149	40.295	47.705	2.465	126.092
46.8	60.592	-85.446	111.67	45.264	50.71		52.452	75.28	35.478	17.798	79.492	29.478	18.926	164.514	-439.829	-190.979	158.842	186.842	47.037	61.422	64.74	26.165
46.933	80.544	-68.474	47.575	65.214	47.445		53.944	26.099	60.947	18.484	61.728	-8.876	-38.668	186.864	-193.592	-278.332	105.403	96.415	54.492	66.765	11.939	70.142
47.067	106.799	-90.589	19.025	-9.918	33.867		34.827	23.838	63.967	-22.078	53.923	111.718	53.194	103.082	-141.593	-174.889	130.487	206.039	35.51	45.566	-23.906	58.227
47.2	-56.716	-48.527	19.186	-26.175	65.068		-9.018	30.922	37.034	18.67	12.979	56.103	-19.252	98.519	-82.522	-213.844	113.285	95.433	123.64	10.397	10.874	74.217
47.333	26.115	-50.261	49.484	3.089	37.628		29.827	36.232	88.448	-7.679	-58.214	46.846	13.026	80.064	8.607	-154.749	60.124	116.781	142.175	11.106	23.671	47.097
47.467	6.501	65.925	61.182	-3.982	41.933		43.065	56.66	42.456	10.322	-25.728	71.218	10.047	101.709	-38.764	-170.803	73.705	221.34	105.238	-121.359	151.461	81.52
47.6	-28.944	-12.31	78.268	81.539	76.358		39.977	40.424	40.408	15.342	-23.141	15.438	-21.782	60.979	53.443	-201.591	93.372	55.008	101.998	-188.37	22.549	62.303
47.733	28.02	-36.359	87.272	13.869	110.763		110.749	50.391	56.606	-12.289	-34.052	79.738	37.262	71.283	-166.61	-78.198	127.596	53.722	65.033	-370.202	24.525	106.286
47.867	14.352	52.323	56.739	39.708	175.763		73.154	48.48	21.962	-3.887	53.35	-21.794	46.379	15.399	48.23	-74.415	87.133	105.686	60.923	-112.027	5.615	71.943
48	-12.506	62.222	-1.345	35.838	-33.522		57.054	54.881	-12.383	-11.954	129.622	140.005	3.562	19.147	-21.389	-84.138	91.976	-22.909	42.142	-26.267	19.334	11.626
48.133	-21.959	38.906	85.989	21.084	220.059		55.812	-29.004	7.449	12.495	259.882	-114.649	14.32	-23.381	-3.894	-35.393	140.704	168.697	-1.2	-107.662	7.893	219.743
48.267	-27.26	32.08	46.485	16.868	227.637		39.872	31.471	-25.899	14.62	14.794	14.542	-15.176	-87.212	6.506	27.117	79.596	51.184	124.834	108.06	-11.195	85.067
48.4	4.742	41.25	7.496	22.88	115.282		12.82	-31.314	30.856	-11.981	8.244	5.214	30.476	-166.719	0.496	-45.933	81.924	71.74	126.175	-67.875	50.494	86.512
48.533	-70.337	79.078	58.391	21.42	196.873		34.187	10.198	14.829	10.549	129.705	-13.823	19.839	-86.506	4.361	-45.034	107.647	15.372	92.287	16.387	2.857	92.077
48.667	-58.441	44.157	10.567	-14.542	104.74		37.313	-15.086	-9.255	-7.026	130.2	5.043	-17.509	-54.369	127.182	-34.765	44.736	-47.609	13.814	23.376	-29.954	96.108
48.8	-64.413	-24.295	29.709	-16.834	114.543		-40.169	-30.648	28.129	-1.577	-2.036	-8.169	16.314	-174.302	-127.196	-38.442	105.895	30.226	-84.905	57.39	101.209	52.265
48.933	-33.064	-28.511	85.103	29.375	48.925		45.864	-16.775	40.187	-23.693	-4.547	28.887	-29.352	-164.626	256.32	-64.51	73.659	14.803	41.13	4.512	48.117	77.732
49.067	93.463	-33.392	56.031	-38.95	30.987		41.692	40.418	72.481	-13.603	-7.028	-21.211	31.911	-75.277	-3.135	110.858	103.064	45.923	21.682	21.132	42.03	34.788
49.2	91.136	89.471	-19.34	34.647	-20.74		20.102	-50.12	73.881	-5.624	-132.094	15.26	-14.669	1.157	-0.604	53.956	25.294	100.842	-20.889	5.476	82.637	22.606
49.333	178.735	-28.226	-27.289	50.318	15.357		29.22	151.965	119.289	19.229	130.693	55.931	25.15	136.589	11.691	77.013	106.692	-13.625	17.899	-15.579	62.61	135.811
49.467	144.142	-17.632	132.047	52.577	-24.578		69.815	-34.716	-13.849	58.473	34.141	52.791	3.8	-112.535	15.7	138.073	127.781	171.706	47.742	86.716	31.303	238.37
49.6	160.506	83.19	61.927	41.156	-156.06		-1.361	-14.596	79.653	19.726	4.604	29.489	-9.216	-6.623	128.054	139.353	41.279	91.216	47.617	-5.805	43.624	91.197
49.733	92.968	86.284	69.833	29.23	94.887		21.421	9.288	98.309	-19.337	0.126	53.242	47.246	25.488	127.265	60.505	31.845	121.65	27.193	6.738	106.143	-8.514
49.867	117.881	82.152	38.482	40.582	-61.769		-14.875	-13.836	28.524	20.523	4.487	30.213	40.228	52.245	29.512	205.547	59.941	143.641	60.849	46.789	77.808	197.864
50	259.93	44.017	37.805	9.461	-36.078		8.855	-4.88	20.965	14.405	-0.75	36.828	13.395	74.825	130.482	236.531	70.25	94.121	38.673	4.28	117.266	109.228
50.133	3.249	16.547	2.926	13.896	-17.37		-5.101	12.484	8.031	16.649	-258.629	25.34	51.563	88.912	-11.462	189.378	20.39	53.73	33.207	51.319	110.254	91.293
50.267	178.273	103.88	-33.582	21.271	12.963		1.43	13.194	9.613	25.341	6.485	38.717	34.592	120.492	-129.293	195.156	7.83	81.688	-12.812	41.935	127.333	64.785
50.4	73.113	75.169	29.981	19.017	91.905		13.541	-16.116	13.61	52.65	-130.352	29.791	36.337	108.139	130.494	126.171	9.31	63.669	-84.636	-62.278	114.92	104.769
50.533	-31.474	178.921	-9.376	141.449	1.761		22.492	-8.828	50.232	46.798	-5.927	11.721	52.044	109.118	5.56	170.944	49.398	120.09	-142.39	163.861	87.219	75.098
50.667	46.966	-57.094	-8.609	-35.282	-128.191		11.818	-31.804	-38.802	37.729	14.307	17.564	45.906	139.961	137.06	118.972	24.98	1.179	-176.502	-56.967	74.221	25.079
50.8	27.705	21.786	49.327	42.837	91.32		20.796	-13.993	49.14	45.403	-5.879	2.707	58.978	71.975	131.527	145.067	63.584	235.789	-175.224	47.951	26.228	-83.693
50.933	121.659	7.935	26.299	-17.62	20.065		-45.294	5.341	185.273	24.932	-11.695	7.047	19.314	122.017	130.601	123.587	83.466	135.407	-217.721	81.959	15.123	312.789
51.067	-49.556	42.965	50.12	26.072	0.711		40.446	22.576	44.753	42.817	-130.068	-15.42	21.512	83.24	20.273	150.318	134.069	137.623	-167.084	104.935	20.758	69.173
51.2	120.838	-30.263	-19.254	42.653	-96.816		-9.761	40.526	34.419	43.102	129.898	22.828	-4.047	59.369	128.218	112.82	84.643	99.698	-202.547	82.195	20	77.764
51.333	-16.121	-20.256	29.136	18.438	100.443		18.686	-17.521	59.302	155.627	-6.039	33.589	-0.368	20.791	130.01	173.13	161.976	178.729	-212.476	154.863	52.144	23.8
51.467	-102.622	-100.722	23.388	23.078	-18.472		-3.926	-15.398	8.325	55.321	5.717	-27.294	32.704	-29.79	-9.265	175.589	96.993	206.356	-253.649	-27.593	-23.859	22.194
51.6	5.094	-129.76	53.926	6.238	-17.308		11.773	-17.85	9.578	53.063	-4.04	58.827	8.699	-27.011	6.052	89.657	186.901	122.342	-229.652	64.337	10.719	53.487
51.733	-2.788	-172.566	23.995	139.987	-9.844		9.095	-28.437	13.592	34.401	4.435	32.055	-4.361	-44.771	128.204	85.757	249.23	75.799	-229.514	42.429	18.232	71.672
51.867	91.097	-147.49	141.167	21.516	6.136		-17.642	-13.889	-2.935	23.05	-3.943	32.304	-3.871	-47.183	-127.198	12.305	270.547	127.691	-211.72	109.942	15.529	26.213
52	11.344	-179.444	70.799	45.508	-122.758		17.017	-25.702	-11.319	17.308	13.137	23.451	-182.808	140.346	128.385	-14.177	175.802	-138.36	-217.446	148.908	-15.639	127.03
52.133	-106.661	-158.153	51.056	38.89	106.069		-14.447	-4.424	96.996	-27.806	8.584	28.653	-234.509	-39.233	3.711	24.785	211.614	406.934	-119.089	58.31	-8.778	-96.163
52.267	-50.346	-221.82	20.898	52.941	3.116		8.058	4.078	30.425	21.847	5.363	31.062	-251.986	174.414	127.241	-5.097	190.157	181.573	-176.125	174.486	-12.562	49.731
52.4	-59.505	-235.368	49.648	48.684	-37.243		-4.799	44.215	62.196	44.943	-14.264	59.659	-269.396	187.482	-128.015	11.177	162.954	152.137	-81.216	65.689	10.65	50.498
52.533	8.071	-209.658	45.411	11.558	-26.393		-5.972	5.438	39.847	15.867	-10.43	42.399	-190.487	122.779	128.201	96.361	125.718	112.873	-10.772	-64.127	27.179	101.855
52.667	-196.152	-89.484	18.871	59.739	73.213		21.729	-22.741	59.78	28.03	17.331	31.17	-198.752	111.635	-9.237	36.752	80.548	135.752	101.687	114.237	-65.104	5.135
52.8	-152.765	-168.863	-26.178	18.93	20.833		8.884	-51.865	35.865	28.551	-130.794	13.788	-185.073	119.37	127.578	47.441	88	95.923	230.314	-111.595	-24.004	29.201
52.933	14.01	-140.836	-4.405	14.748	92.061		-17.264	1.629	14.905	22.327	129.167	2.323	-127.262	135.354	-127.21	83.077	82.685	99.053	148.668	-5.392	82.257	15.544
53.067	-99.38	-197.033	-11.217	24.373	85.713		13.244	47.823	52.145	60.76	-0.658	81.868	-61.221	99.353	127.155	66.64	13.484	116.946	230.804	586.55	71.614	12.799
53.2	-295.986	-178.845	-13.021	-13.643	92.85		-5.124	25.483	35.219	19.192	11.5	91.221	-90.456	54.835	-7.992	84.503	-59.975	73.371	240.004	29.536	28.486	24.363
53.333	-76.355	-152.29	39.288	7.915	118.704		18.937	31.028	32.569	21.399	-1.861	51.055	-98.04	272.108	127.394	105.576	25.919	-0.353	241.033	138.062	123.207	2.068
53.467	-274.106	-143.326	147.441	65.66	192.974		17.993	-7.967	-17.495	126.364	-14.168	94.699	-59.886	-107.916	-127.671	62.096	168.988	212.724	240.786	-130.571	122.969	125.669
53.6	-164.595	-239.353	22.877	31.045	96.019		30.619	-22.686	18.65	-8.746	-1.546	48.477	-106.641	110.035	127.335	66.94	21.313	127.544	358.29	-3.763	-245.995	-126.044
53.733	-63.697	-60.63	45.764	42.622	89.652		10.373	80.968	-22.851	57.21	-130.046	87.282	-86.792	50.386	10.718	17.702	82.323	129.595	120.476	28.729	246.197	127.923
53.867	-148.481	-175.521	52.412	57.492	143.856		15.755	49.906	16.855	97.874	128.499	52.171	-47.293	143.547	-127.088	37.214	47.171	109.709	121.45	-25.823	-14.777	-126.335
54	-172.681	-170.243	-14.261	62.471	78.818		-1.474	68.191	18.686	84.331	-130.973	29.889	-8.888	85.709	7.632	-21.374	-21.123	213.83	245.677	11.531	-6.604	11.317
54.133	-255.231	-177.235	37.105	11.65	58.721		0.814	53.36	13.8	68.614	-11.96	68.832	-11.63	94.183	254.658	-102.954	-180.686	147.201	54.658	-84.027	123.349	128.566
54.267	-71.15	-218.495	7.877	22.821	91.146		-1.079	20.896	12.109	-26.072	23.47	61.684	-54.526	88.253	-127.689	-20.107	-260.169	124.461	174.095	-168.136	-4.449	-127.886
54.4	72.695	-165.055	-5.321	23.526	77.183		2.221	39.962	15.575	58.336	-9.046	101.726	-63.227	110.529	127.133	187.553	-292.766	178.326	161.201	117.535	7.837	131.751
54.533	-10.356	-126.032	-30.368	20.416	11.422		8.943	36.326	-25.498	47.084	-4.156	62.584	-33.36	59.955	-6.974	181.517	-172.469	188.064	99.444	96.935	124.079	-0.928
54.667	-80.08	-54.025	-13.129	14.471	9.775		-12.372	18.506	123.663	-130.843	-130.629	77.68	38.805	269.648	127.415	111.308	-215.202	156.839	134.417	409.533	123.385	-20.223
54.8	-72.01	-52.273	120.122	4.731	-24.927		-3.269	68.017	-111.524	187.259	-104.111	37.624	97.713	-90.158	19.774	65.418	-298.889	164.083	110.229	28.99	-124.278	-0.499
54.933	-251.234	-113.311	17.85	13.918	-34.68		10.133	28.802	-13.325	18.107	17.109	26.137	-31.344	61.675	13.808	-24.512	-148.754	124.865	132.963	55.811	124.892	-0.27
55.067	-54.998	-123.14	21.315	1.614	93.855		23.248	64.08	23.042	19.815	10.211	27.274	-12.674	128.459	32.362	-36.469	-280.808	210.351	208.492	32.819	-17.889	-4.639
55.2	-35.789	-105.12	11.661	15.05	-37.484		-35.653	51.402	-13.661	31.793	-6.67	17.633	10.952	99.945	41.485	16.128	-238.575	129.625	233.2	51.57	123.322	-8.641
55.333	30.8	-82.203	-4.3	5.005	38.695		29.665	39.819	78.019	10.352	17.574	7.956	89.01	99.728	14.131	-0.96	-247.417	142.889	245.979	69.123	-2.51	-127.889
55.467	28.152	-19.392	-7.814	4.712	-14.637		48.473	34.204	75.091	6.169	-35.563	50.569	55.848	109.454	-81.885	36.689	-260.805	53.237	232.325	54.336	-2.876	129.002
55.6	-5.307	8.847	15.48	-7.74	14.163		-14.17	32.316	53.738	1.407	-19.906	23.046	-20.37	73.241	-14.754	-21.358	-303.541	54.999	215.791	-16.409	124.843	21.183
55.733	-16.946	55.09	-5.008	1.379	-25.07		48.32	29.228	32.728	-9.078	5.425	18.3	48.442	100.517	175.233	-9.181	-110.76	-58.028	181.779	73.706	-0.343	7.018
55.867	27.366	178.607	6.073	19.321	-271.068		10.414	15.574	14.879	20.54	-6.656	26.646	24.403	28.784	40.285	-22.296	-133.198	107.618	163.745	24.002	-246.957	127.069
56	201.898	144.726	-40.761	-10.9	-361.954		7.07	44.921	14.956	41.46	136.846	15.367	56.686	71.199	-16.519	24.491	-191.184	111.541	206.898	-130.932	126.493	-125.672
56.133	26.374	126.054	41.149	3.96	-248.889		9.365	27.462	68.647	-51.095	-141.98	-12.93	68.005	63.814	86.604	3.808	-238.843	144.557	149.444	197.215	125.718	126.996
56.267	9.77	77.709	2.504	-7.608	-353.882		37.115	24.821	29.506	9.06	8.394	10.866	-21.223	26.249	32.97	15.768	-232.372	136.993	118.287	-14.578	123.755	0.368
56.4	40.116	144.388	-8.637	-5.748	-117.635		10.047	13.727	25.105	4.154	-5.867	11.154	3.548	79.573	69.713	43.677	-143.988	144.084	176.76	94.281	123.732	-125.679
56.533	75.155	108.317	-28.984	15.831	-123.856		-3.524	25.659	8.785	7.11	9.018	-16.229	28.072	62.226	28.082	63.738	-80.55	242.485	75.311	46.917	-123.72	19.742
56.667	177.16	102.977	-113.355	6.238	-250.201		-22.575	27.896	20.9	-13.066	-2.934	17.31	47.942	97.483	70.563	32.758	-20.298	28.39	139.108	58.676	-13.911	8.528
56.8	-50.296	77.097	-100.406	-0.471	-37.763		-83.14	24.259	15.892	70.814	-1.755	-20.587	-9.06	33.827	22.643	101.747	78.383	260.574	128.231	69.561	3.876	127.705
56.933	140.591	61.677	-83.604	1.164	-117.986		-109.99	17.789	5.287	-18.19	62.448	4.418	8.183	90.585	24.88	-1.981	114.223	110.791	72.867	35.468	123.797	-125.391
57.067	-46.955	13.046	-83.32	9.133	-68.493		-105.626	20.422	-1.782	-72.866	-32.577	16.866	10.475	125.683	49.034	16.601	92.702	87.846	55.301	27.549	-123.11	9.045
57.2	188.647	56.85	-76.363	18.114	-97.6		-128.046	27.503	-79.109	14.564	15.706	47.075	-3.183	82.827	-25.561	-35.641	103.63	121.787	13.814	35.884	124.186	14.376
57.333	176.43	14.713	-129.653	-2.379	-125.381		-77.521	7.617	116.685	29.764	277.115	-10.328	-9.022	8.399	6.177	-114.696	130.391	-140.161	26.683	-129.489	-14.749	128.415
57.467	147.411	-11.315	-98.155	-4.919	97.028		-95.15	5.466	-58.335	-29.74	-300.603	14.747	20.063	92.775	76.976	-142.051	104.694	247.244	73.572	200.452	43.45	59.261
57.6	27.443	10.015	-35.232	1.249	-6.116		-103.063	-20.951	-13.343	-2.399	5.229	18.862	-80.893	87.158	36.663	-144.535	133.317	22.03	78.783	65.761	124.137	32.956
57.733	-27.291	-18.999	-69.426	-19.088	35.715		-73.45	-7.668	0.644	-7.401	43.833	-13.643	-114.571	117.444	93.937	-110.146	180.925	39.323	55.298	-5.637	9.256	127.655
57.867	66.681	7.453	-3.781	-18.921	64.948		-92.581	-8.237	-1.368	82.48	-18.976	23.786	-105.942	52.621	46.654	-96.044	169.257	8.244	84.511	52.582	8.223	9.471
58	75.417	11.308	7.435	10.491	116.234		-63.054	-5.501	-8.295	-60.422	-15.342	32.634	-53.297	73.903	43.471	-128.793	92.424	-0.317	82.323	-22.218	-0.138	127.133
58.133	-26.449	48.725	-3.875	-14.795	117.733		-82.095	8.41	-7.757	72.224	-10.36	10.659	-90.752	51.749	-8.917	-175.519	150.159	-112.495	78.922	35.702	120.57	7.341
58.267	127.334	17.76	50.555	31.236	126.029		-70.245	11.348	-23.647	-10.03	8.452	-6.643	-49.998	50.071	19.606	-143.512	99.529	-6.186	92.316	20.672	7.093	126.63
58.4	-7.901	18.363	30.947	-25.5	-36.979		-16.523	3.93	-5.833	-15.728	51.86	41.398	-37.674	32.85	7.715	-190.621	124.36	-45.572	84.859	37.979	241.927	-1.6
58.533	26.932	87.363	97.383	-10.256	51.538		-33.01	-14.423	-17.08	35.223	28.702	-22.406	-8.672	56.163	37.495	-83.593	111.326	-63.332	93.69	-4.256	-120.459	127.068
58.667	-129.922	118.98	-17.442	-33.309	123.251		-78.398	1.511	-46.341	-83.064	22.582	17.304	16.14	112.434	-20.786	-72.511	94.36	4.812	91.965	44.845	244.189	-125.93
58.8	17.078	139.516	91.002	-21.563	154.658		-69.45	-3.162	-45.008	-4.79	6.304	39.904	18.642	70.578	57.082	39.249	91.346	114.932	76.081	-13.622	-119.63	8.1
58.933	5.235	67.44	46.425	25.911	105.927		-79.117	-12.798	-30.492	-12.541	-8.209	-11.852	17.626	53.548	16.645	97.587	178.115	-21.579	113.893	68.11	4.301	127.528
59.067	-34.205	92.262	32.018	8.057	106.742		-58.072	-22.5	-79.734	25.092	-19.166	-4.954	-6.109	118.91	-26.889	136.971	144.376	-36.721	115.672	-18.819	124.077	8.34
59.2	-97.7	46.449	12.733	-29.756	31.124		-53.196	-42.188	-37.045	4.435	19.936	-10.6	-15.379	14.028	8.998	74.154	76.168	-20.223	68.622	-48.598	-120.398	126.665
59.333	-140.7	67.797	37.28	-181.772	-14.03		11.402	-24.639	-50.743	17.645	43.537	-2.959	-5.919	48.192	25.5	106.67	109.577	-38.11	80.227	-186.584	126.131	-126.257
59.467	-220.83	120.404	27.284	-147.009	62.178		10.315	-37.898	-20.109	26.202	28.458	32.587	33.448	46.531	-8.588	67.674	79.118	30.703	90.885	-252.796	19.261	127.667
59.6	-260.148	88.997	-6.601	-129.49	119.177		-37.726	-42.992	-20.9	-7.892	17.098	-25.298	-26.577	41.453	-42.408	29.824	71.059	36.586	93.494	-188.967	4.509	1.51
59.733	-234.291	122.277	-5.915	-91.588	68.116		11.842	-9.357	-22.003	-7.224	33.007	-13.521	52.157	340.804	-23.137	134.7	65.038	111.672	104.287	-217.475	5.439	126.198
59.867	-209.4	52.023	-14.863	-69.911	120.645		90.691	-16.72	-15.324	-8.374	141.47	-7.663	24.027	15.806	34.803	132.572	-72.869	350.708	145.65	-241.874	125.019	-126.673
60	-213.952	30.059	128.692	-87.289	85.708		101.456	-16.294	-35.655	9.002	140.804	144.397	21.73	149.484	1.241	132.402	-197.795	102.752	70.969	-119.494	-121.216	-19.275
60.133	-168.428	79.836	-52.582	-92.804	113.599		40.158	-25.545	-38.526	-2.475	20.634	-146.309	7.312	-174.495	-274.563	10.191	-292.042	63.642	94.356	-200.457	9.898	126.527
60.267	-152.368	124.469	3.524	-103.686	100.906		52.072	-11.11	-59.164	29.587	2.33	-19.787	-16.216	-359.801	-135.453	131.402	-351.112	120.261	103.475	-116.195	124.166	-3.014
60.4	-128.05	109.531	14.822	-56.797	64.218		59.264	-35.5	-110.702	26.07	-24.577	-115.477	21.636	-15.925	20.456	-132.305	-325.684	73.152	109.901	-448.813	22.572	-126.051
60.533	-114.457	128.131	36.145	-64.137	79.169		66.618	-11.248	-77.943	16.132	24.365	-174.358	-11.487	-64.624	7.468	-25.342	-201.175	9.79	128.684	-192.35	17.695	126.095
60.667	-12.321	207.148	27.926	-108.176	62.803		32.904	9.249	-83.509	9.907	139.845	-135.212	34.02	-96.278	-138.864	-3.179	-276.809	85.974	190.585	-145.206	2.67	7.008
60.8	131.41	92.801	77.932	-48.046	66.254		7.365	14.313	-99.734	25.403	-139.317	-90.127	55.089	-127.348	-271.221	639.348	-241.017	31.853	97.706	-132.303	125.194	125.797
60.933	157.368	120.307	94.325	-48.926	25.574		40.097	8.803	-84.363	101.945	-16.09	-153.148	24.128	-99.115	135.792	-132.208	-24.123	89.549	112.277	-152.216	125.085	-23.115
61.067	151.643	182.46	113.826	-33.466	163.127		52.135	23.094	-93.459	-62.545	9.379	-120.444	29.971	-41.707	-10.056	-2.99	119.822	143.718	16.736	-141.726	-22.481	13.954
61.2	199.33	127.801	7.041	-48.771	104.371		24.112	18.525	-142.482	36.256	4.496	-111.641	43.626	129.692	-135.639	-5.32	64.269	114.475	-13.337	-115.525	122.503	-15.973
61.333	185.794	360.5	40.957	-113.164	66.848		67.803	64.619	-92.888	11.868	-2.65	140.414	19.778	134.989	136.082	1.277	235.484	124.439	37.411	-20.557	16.563	127.909
61.467	187.138	-75.463	64.586	85.604	115.346		50.606	13.422	-59.05	34.09	9.161	-284.911	-5.089	-60.14	3.432	263.324	203.179	124.26	155.993	-106.816	9.652	-126.092
61.6	200.597	123.028	22.239	-24.179	69.063		45.383	-31.548	-68.354	34.982	-8.419	-58.515	16.77	145.788	5.665	12.837	160.591	127.432	193.943	52.67	123.479	-5.518
61.733	163.797	121.051	25.876	6.085	114.832		43.69	-7.654	-12.2	32.173	-0.892	-54.012	8.096	89.083	135.746	-14.488	350.175	17.289	171.147	53.47	122.952	-7.856
61.867	8.988	59.375	-14.229	-16.783	92.46		72.752	-1.96	-63.282	-9.959	-1.496	-21.321	-4.485	78.514	16.96	130.908	127.621	38.568	128.469	161.948	120.138	126.015
62	-127.939	114.027	38.487	-21.809	83.643		-48.623	4.276	-72.375	6.107	18.479	20.764	-12.375	105.785	136.542	-151.948	189.614	74.654	105.475	59.585	-121.797	-125.965
62.133	23.339	141.87	137.678	-14.832	86.145		62.227	42.759	-45.81	-2.361	-3.532	-17.68	-14.205	86.137	137.197	5.473	170.347	93.374	130.733	119.189	121.438	3.37
62.267	220.197	106.944	84.271	-26.62	67.082		79.518	-14.909	-41.68	4.095	138.995	25.589	43.509	57.308	12.174	4.577	243.219	76.794	119.746	17.936	241.604	-1.562
62.4	-139.411	132.172	107.294	12.208	98.807		145.456	-13.112	-6.156	-12.094	-139.442	50.56	-28.559	91.314	-5.829	58.58	206.539	138.655	129.208	66.333	53.627	62.096
62.533	-426.145	39.702	51.109	-46.675	69.69		-18.794	-52.993	-21.64	-28.6	-4.036	-13.411	23.975	54.505	-18.506	34.849	198.71	119.438	79.156	100.849	53.753	25.088
62.667	-380.5	121.444	20.968	-58.191	31.049		170.704	-30.844	30.045	7.753	-9.865	16.565	-15.447	136.934	135.392	6.428	133.204	136.947	137.79	69.676	-19.794	3.88
62.8	-268.409	69.898	150.113	-215.788	-12.563		48.707	-9.959	-9.598	15.025	-0.3	-11.378	49.028	-46.871	-11.014	43.813	140.052	107.986	86.643	89.606	22.904	-16.182
62.933	-225.764	52.635	47.05	-65.764	-9.251		69.736	4.039	18.554	25.735	-2.193	-4.764	45.446	85.906	-14.607	47.432	185.821	89.986	78.196	63.481	38.869	-16.845
63.067	-196.882	109.92	24.056	-55.655	-44.501		67.721	7.259	-2.877	5.038	13.209	26.419	57.623	-67.687	134.576	-8.239	116.511	75.836	104.749	30.885	17.202	25.722
63.2	-213.038	84.557	64.185	-112.803	19.305		28.05	-7.182	8.784	29.257	-0.51	-1.576	65.857	69.601	136.147	47.042	93.588	52.351	120.453	-15.774	44.121	-21.966
63.333	43.209	80.579	52.926	-114.904	-16.232		84.181	7.326	-17.015	21.148	-139.469	-16.093	118.834	31.856	140.604	151.439	177.064	123.526	118.173	24.573	15.075	2.922
63.467	-7.086	92.435	58.114	-68.917	-16.789		10.283	-28.423	42.53	10.47	139.333	25.584	49.982	151.509	-12.728	112.155	129.864	81.115	74.801	17.975	-0.55	-28.007
63.6	-14.454	44.337	11.835	-73.897	-34.624		-22.375	-11.994	66.031	34.102	139.945	-9.26	63.393	82.862	-7.019	91.963	-41.675	61.566	124.695	28.123	-22.758	-14.482
63.733	96.788	78.033	71.197	-60.061	95.855		10.646	9.343	-16.436	9.291	-139.517	-40.868	47.6	-50.682	-5.313	162.073	101.997	111.05	100.702	76.571	-3.561	-124.552
63.867	114.725	102.232	46.002	-6.612	53.691		10.666	38.225	17.483	-7.722	8.918	21.391	69.778	59.127	8.414	122.366	116.705	86.843	123.067	69.266	27.469	120.373
64	114.695	121.643	-2.892	-116.847	-16.504		12.115	78.057	-15.788	23.032	139.798	20.309	68.432	277.58	-11.877	133.711	159.523	92.226	66.286	56.854	-20.116	-11.903
64.133	113.168	33.081	134.155	9.068	-8.311		24.081	3.054	-26.058	15.438	-139.477	-26.784	-13.486	-203.382	-15.272	82.665	45.303	73.689	75.502	79.4	-14.483	-66.651
64.267	107.271	41.5	91.231	-13.608	-50.687		41.617	61.987	28.994	7.056	-18.642	-7.367	52.796	40.491	135.441	51.94	47.93	127.083	98.678	194.057	12.228	-5.399
64.4	129.356	130.19	52.527	-15.496	-6.237		21.743	26.683	14.334	-13.091	140.42	53.111	23.108	21.112	1.787	73.862	96.959	136.834	119.435	42.389	-18.476	-9.776
64.533	136.754	150.008	56.168	13.057	-3.757		74.137	30.201	23.107	-2.79	11.553	44.833	13.588	-16.16	-135.662	50.409	63.833	83.422	72.292	113.935	-6.079	-23.834
64.667	213.359	108.179	68.823	2.48	98.829		15.269	43.21	49.154	10.534	-139.368	74.072	8.787	13.326	0.973	59.634	190.191	88.256	45.567	-25.049	-14.536	-27.151
64.8	139.74	111.32	63.509	22.817	112.489		15.232	39.609	-18.565	4.902	139.974	101.379	21.742	13.879	136.99	51.426	94.82	51.179	68.646	416.41	-73.286	-38.057
64.933	166.369	74.904	35.974	38.879	59.647		39.851	-63.303	52.165	6.466	-10.895	103.194	-10.998	-13.154	-7.787	34.46	66.511	10.183	81.445	56.773	-59.508	-1.496
65.067	135.041	110.496	53.182	2.303	7.571		17.039	42.52	-14.23	4.473	-15.113	143.382	-12.907	72.659	-15.997	62.532	77.192	-5.468	102.753	36.145	-27.606	39.407
65.2	97.626	147.158	70.601	10.501	16.884		38.979	137.808	8.353	-0.86	-25.669	106.607	33.536	14.669	-3.574	63.432	115	87.366	72.226	-48.794	44.786	-12.126
65.333	153.996	248.448	128.991	23.503	134.784		44.409	40.923	117.848	31.628	15.558	68.517	21.362	28.811	1.617	43.194	97.049	118.437	73.812	-74.584	35.609	-36.674
65.467	115.557	-46.673	-59.326	29.424	65.332		32.579	32.798	-118.64	33.569	3.296	26.747	92.281	-102.236	8.933	95.648	-70.482	188.953	48.719	51.369	-6.378	-25.241
65.6	83.196	28.433	34.41	-24.479	3.807		30.31	-12.326	22.758	-5.216	1.034	28.576	6.694	75.586	-6.071	40.506	120.342	66.45	106.276	48.881	68.603	-75.013
65.733	54.47	118.397	10.547	38.446	19.922		13.94	11.607	-3.771	-17.224	137.276	8.031	31.362	40.69	-8.991	10.795	-42.401	120.561	31.307	113.58	16.251	38.421
65.867	160.44	102.881	-8.745	44.85	-39.666		9.415	23.506	-19.537	-2.654	140.154	35.818	60.662	65.694	9.744	63.843	9.857	147.27	55.979	5.321	51.907	-26.849
66	-60.354	75.875	-3.535	35.751	-11.767		36.809	-15.708	22.366	-7.341	-4.671	12.063	103.624	34.753	8.382	72.144	203.077	80.782	69.037	-51.128	14.627	-29.633
66.133	-37.639	68.082	31.434	34.3	19.707		26.961	24.589	2.965	-12.403	138.682	-3.406	17.844	67.203	-135.893	37.547	74.894	132.702	26.557	47.408	33.487	11.349
66.267	45.399	159.759	23.146	45.283	-6.523		2.497	-3.471	18.019	-2.278	-0.274	0.844	27.688	79.167	135.461	77.779	228.663	66.958	34.649	13.842	-9.088	-41.986
66.4	113.362	90.297	40.081	-37.388	-35.59		-3.08	15.611	11.615	7.383	-4.726	18.133	13.752	88.227	-136.905	11.285	-67.444	97.424	35.435	-42.421	-9.709	-131.225
66.533	-109.131	109.137	34.306	29.714	-68.456		10.284	9.726	-22.368	-31.674	139.159	-11.384	-15.488	48.049	137.727	47.364	325.96	32.92	-16.81	48.533	12.713	-171.353
66.667	124.283	250.206	129.098	14.815	-176.474		44.679	-5.641	-119.835	35.169	140.368	-6.064	40.842	140.071	-3.603	53.355	170.083	-82.931	22.845	-58.711	28.875	-146.746
66.8	1.691	23.699	45.539	-8.211	-204.251		3.425	12.738	-188.221	41.158	142.225	-13.889	28.127	-140.331		34.311	109.933	113.427	12.428	55.591	2.166	-211.943
66.933	-5.877	64.978	137.247	9.076	-264.61		-16.422	-14.427	-113.665	-3.961		20.27	45.146	-13.139		44.239	34.603	23.831	-17.4	89.946	16.825	-136.212
67.067	-22.524	38.082	126.37	5.258	-229.374		-16.395	-27.688	-83.343	13.341		-12.184	34.594	4.409		40.539	-54.313	-133.985	1.52	302.135	29.378	-43.763
67.2	-39.136	21.7	68.843	40.159	-261.281		5.198	11.889	-98.699	18.816		11.379	48.19	29.939		88.669	-255.443	-17.977	11.082	125.105	6.302	-142.479
67.333	15.567	46.734	42.344	21.639	-189.703		6.719	25.199	-97.578	-3.975		-37.145	62.495	-29.234		55.502	-403.089	-17.041	6.098	-51.439	-11.262	-31.911
67.467	41.59	19.578	41.774	15.099	-160.929		4.549	19.214	-118.056	81.121		21.571	61.763	52.816		45.586	-256.858	9.866	20.557	249.786	-22.845	-59.384
67.6	-91.901	18.522	8.039	26.418	-194.992		41.087	22.872	-53.068	-115.033		-3.947	63.327	125.317		36.373	-19.735	-22.946	-5.591	70.774	11.296	-31.384
67.733	84.138	17.206	53.085	14.619	-247.45		30.445	-2.454	-89.795	-27.132		-23.654	18.37	-16.11		63.363	-66.213	-7.271	-22.807	43.334	-9.596	-27.188
67.867	123.263	8.248	5.862	30.613	-258.149		25.093	-6.163	-52.153	-156.048		-18.449	95.171	-81.144		-100.831	-65.611	7.76	27.762	16.758	16.884	13.771
68	143.236	124.422	-6.5	19.042	-247.255		31.305	23.987	-116.813	-393.424		-20.1	73.833	-108.678		78.404	-67.619	-21.032	62.047	80.027	22.872	-29.842
68.133	98.499	-132.985	49.307	16.609	-40.38		-15.213	-5.763	-101.151	-23.711		-10.631	44.916	-232.433		-12.548	-145.407	36.373	42.454	41.799	28.341	52.49
68.267	95.672	48.593	5.809	-25.268	-11.861		3.12	3.074	-102.232	-47.7		-32.19	74.701	-184.568		86.078	-102.188	25.128	58.437	54.433	-0.44	-6.272
68.4	35.455	71.99	7.057	-12.226	23.016		26.156	6.897	-115.274	-113.874		17.466	62.474	-185.18		38.156	-77.846	29.638	39.746	15.939	2.26	-10
68.533	104.572	66.746	5.586	7.729	-34.369		-0.975	-13.542	-123.345	-222.513		-17.323	76.828	-210.141		81.335	40.666	-31.904	101.688	25.107	1.806	-25.606
68.667	58.389	83.808	1.175	-9.327	40.774		6.144	-2.111	-116.021	-34.123		-23.946	60.595	-158.373		79.419	147.696	-5.851	64.416	-8.128	-1.279	19.857
68.8	75.12	84.516	4.608	32.586	67.082		-3.197	-26.622	-121.238	-73.904		-23.108	19.443	25.521		10.287	179.617	21.074	15.887	64.062	0.279	36.824
68.933	55.001	34.644	-5.127	27.184	110.232		9.783	20.134	-123.245	-56.118		-38.793	45.455	-129.842		80.266	311.674	48.876	8.705	4.054	-0.63	42.989
69.067	167.385	58.788	8.678	37.275	62.272		-3.039	45.557	-44.736	-40.627		-22.252	20.398	-30.114		18.216	156.426	159.716	54.994	47.139	12.154	20.921
69.2	88.738	69.724	-3.659	-7.436	94.926		-1.543	-5.706	-11.125	-7.069		-30.387	25.641	28.119		40.147	125.554	45.305	82.718	8.755	16.518	53.105
69.333	17.442	132.935	125.753	30.904	49.091		24.249	33.721	11.128	18.455		-6.852	83.392	124.561		17.718	194.007	108.985	43.033	27.335	25.309	63.452
69.467	140.432	60.456	-125.072	61.331	107.719		-6.522	23.838	-123.863	123.137		-30.41	8.065	72.391		70.652	94.119	98.395	57.771	7.373	-9.822	100.419
69.6	158.775	73.885	-12.596	7.771	117.361		-9.28	44.252	21.15	51.946		12.485	4.596	94.99		16.684	219.786	88.58	46.386	13.769	-28.27	23.313
69.733	79.632	58.888	-25.02	75.597	103.347		4.381	57.748	20.846	176.693		-4.173	44.794	42.207		-9.087	255.286	72.866	90.021	39.242	17.35	-74.58
69.867	236.111	46.099	-10.38	32.92	108.985		0.954	55.906	105.615	41.951		-24.635	12.485	42.228		14.83	245.615	93.489	92.063	24.806	-17.277	44.48
70	69.215	100.823	-33.082	26.274	46.174		8.568	-57.435	-21.069	226.42		-21.764	5.961	41.941		-13.945	210.031	78.533	66.934	-1.587	14.024	79.715
70.133	82.794	105.108	-4.748	24.93	55.755		-8.916	10.131	1.886	-45.855		-1.86	-4.351	27.195		11.488	269.119	88.665	60.946	42.469	-1.404	-107.754
70.267	74.081	56.738	-13.524	11.507	97.317		-0.441	109.039	-88.813	36.528		-20.016	-12.54	47.402		15.024	280.784	90.023	56.221	7.577	-14.703	132.464
70.4	50.919	123.547	-12.748	17.914	40.958		8.49	18.614	-146.221	97.467		-14.388	20.497	74.561		-26.149	200.3	86.616	46.902	20.854	15.312	-10.83
70.533	85.935	49.568	10.463	8.605	52.871		9.413	-7.924	-217.828	1.02		5.163	10.055	78.264		7.311	151.394	64.591	25.631	63.816	-7.278	21.812
70.667	102.782	121.076	5.785	17.917	33.835		-9.548	-8.955	-60.478	-66.812		-26.209	-11.019	9.597		20.046	218.652	63.889	34.163	-124.86	132.164	38.008
70.8	60.247	-21.868	-38.114	22.431	31.139		4.836	-6.703	-97.297	14.077		-17.415	-8.596	-9.242		-12.163	156.712	61.704	27.395	119.896	-145.175	36.77
70.933	61.649	115.187	-11.629	-10.473	22.284		6.521	10.196	-24.022	-8.786		-35.591	-51.487	-46.443		-26.002	170.192	35.051	5.358	-62.139	10.664	-7.104
71.067	81.476	143.704	-16.377	-30.274	33.23		-33.253	-6.698	-21.923	6.183		-27.186	24.497	18.8		-15.73	232.615	91.513	-23.659	-16.943	-14.103	8.442
71.2	125.993	102.289	-17.327	26.234	75.373		-6.015	-25.007	3.632	-21.003		-17.966	-14.566	-9.916		35.94	226.845	43.394	56.297	46.234	11.186	-8.004
71.333	11.14	121.526	-24.124	5.879	-2.355		-3.849	11.419	41.138	-25.211		-13.689	-2.744	8.325		-13.569	192.1	11.043	103.955	-25.799	-14.334	1.293
71.467	166.437	70.85	-2.901	-2.08	62.246		8.321	-10.299	57.474	98.474		14.234	-34.349	-181.956		23.137	201.37	-41.192	100.35	20.075	-14.574	12.287
71.6	95.065	44.621	-5.609	45.534	73.104		23.731	2.69	-9.958	-22.482		-30.179	35.837	-84.984		28.42	196.192	58.755	36.414	42.253	11.602	11.489
71.733	40.184	61.126	-9.792	-7.568	61.497		10.673	-3.956	117.271	-28.416		-16.885	-37.908	-80.418		-26.579	175.384	53.542	37.46	60.242	-10.572	7.129
71.867	1.542	52.289	-19.341	36.645	99.455		11.484	-19.429	-92.566	14.722		41.641	-33.74	-137.597		19.261	176.08	44.335	31.572	64.164	-14.401	-112.091
72	54.301	121.415	-128.459	49.944	92.12		-11.503	-8.978	-27.125	35.603		88.641	-38.32	-173.57		31.521	182.838	45.957	29.463	-126.127	-9.414	125.859
72.133	57.614	65.519	118.337	31.781	76.369		-5.435	16.521	15.88	6.505		-26.591	-26.381	-153.056		-9.545	169.736	67.455	28.303	347.654	-20.516	-47.247
72.267	-14.735	90.295	-30.025	62.38	95.822		-17.625	20.506	47.094	21.66		27.157	2.901	-69.763		3.957	79.56	29.157	19.21	89.888	-13.541	31.669
72.4	140.487	160.055	-35.686	31.804	96.917		-9.015	-18.053	106.471	39.785		33.515	-28.756	-75.822		-8.05	202.798	-58.39	20.455	130.214	23.817	-29.163
72.533	70.256	106.32	-61.843	36.724	97.163		-13.284	86.717	260.211	-116.281		25.459	-20.999	-35.19		-8.129	147.257	50.076	26.73	103.916	-9.468	9.338
72.667	183.301	117.231	-55.735	55.078	79.191		8.015	77.67	61.574	13.454		23.191	-36.426	33.896		-8.804	161.752	5.968	51.669	41.964	-23.318	25.696
72.8	-58.011	58.137	-105.23	18.911	83.989		30.876	65.651	31.217	4.14		-10.338	-22.114	188.52		5.158	12.296	59.031	54.803	53.637	-38.956	-18.16
72.933	130.487	26.304	-36.122	42.323	88.687		-3.379	-17.043	74.279	7.225		39.739	30.504	166.204		-34.116	247.019	100.114	13.827	38.435	-8.754	21.885
73.067	20.655	118.867	-44.635	46.272	82.616		8.839	-1.539	112.925	-7.972		-42.276	-39.964	66.723		43.516	24.907	134.269	29.29	49.13	-7.749	12.133
73.2	-24.573	68.017	-10.468	54.105	81.328		-12.973	-21.695	80.035	90.206		25.912	-17.547	27.032		31.909	116.402	135.948	6.034	84.518	-15.901	-22.959
73.333	-81.244	250.879	10.574	68.699	120.034		-8.224	-100.622	110.236	3.849		77.954	-27.5	56.443		-29.617	255.624	14.024	-21.507	129.05	25.913	-23.514
73.467	123.721	-99.401	52.368	50.226	125.035		6.151	74.828	124.984	-109.373		39.52	-34.786	43.874		51.764	125.77	165.222	17.597	-40.033	-13.088	8.982
73.6	112.984	9.989	85.211	31.746	59.199		-6.612	-19.362	158.028	86.688		83.406	-54.016	-52.718		-68.006	139.137	63.966	-32.706	111.216	6.891	-6.339
73.733	31.435	19.917	-37.961	46.979	76.43		-45.694	10.089	20.223	-28.741		23.122	26.267	32.072		20.701	130.405	45.897	13.097	152.147	-4.902	9.361
73.867	49.135	-58.872	-52.701	53.443	130.459		-16.934	13.463	13.507	-2.415		33.4	-47.385	-20.416		-11.278	134.87	55.356	68.228	29.143	-38.318	-127.234
74	-67.38	-23.641	-54.059	78.449	74.143		-14.217	5.699	-95.668	-1.329		38.536	-25.631	20.737		37.979	99.479	4.624	-15.048	76.404	23.362	93.642
74.133	99.789	-12.559	-12.009	96.8	73.997		-16.527	-20.141	31.298	-23.078		22.337	-43.324	80.869		-31.61	38.133	44.429	17.408	-92.227	-2.458	-163.457
74.267	-49.186	-4.004	-9.642	63.177	118.749		-57.246	-1.471	6.319	-11.582		45.211	-40.391	-238.88		10.291	194.03	40.495	12.859	81.245	-28.015	-6.633
74.4	-245.374	3.868	6.224	45.59	85.476		-23.772	-18.375	-12.844	11.734		32.81	-40.188	-225.445		-23.114	61.921	28.098	14.533	142.053	-40.869	-289.525
74.533	-225.251	4.21	60.158	12.456	127.146		-53.913	-42.775	41.148	3.577		24.508	-30.517	-231.285		35.208	165.604	24.569	27.869	68.036	-34.498	-103.177
74.667	-268.181	1.915	-13.32	17.624	105.097		-62.635	-61.424	20.693	29.826		15.91	-37.931	-73.837		37.186	122.509	30.874	4.084	125.816	-72.916	-16.123
74.8	-294.815	-18.979	157.336	-104.782	119.444		-63.17	-111.62	48.51	6.026		8.379	-37.885	-223.673		-35.152	125.474	28.73	-24.416	68.312	-81.189	-166.031
74.933	-140.333	-23.013	47.817	151.161	103.351		-104.042	-101.79	59.039	-130.375		-4.599	-70.436	-398.106		9.242	97.691	0.508	23.115	48.982	-102.67	-160.411
75.067	-255.124	5.277	4.377	76.855	101.673		-69.712	-143.226	39.97	94.109		-17.095	-39.382	-259.513		-8.374	107.864	24.527	-8.978	57.221	-114.035	-101.544
75.2	-179.801	-88.975	66.659	65.411	77.536		-95.401	-68.582	112.672	1.914		28.241	-13.842	-283.548		-22.274	53.255	13.189	-6.372	74.388	-116.717	-112.831
75.333	-257.865	-115.144	13.631	201.599	121.519		-88.701	-104.193	58.025	-3.184		11.044	-33.808	-250.366		-33.393	145.532	8.447	-16.486	200.135	-171.52	-145.763
75.467	-327.079	-188.995	-10.334	-16.742	150.811		-55.951	-107.985	32.837	-29.589		24.816	-32.594	-124.051		65.918	129.56	108.882	57.797	29.257	-110.889	-83.878
75.6	-231.459	-202.315	-8.714	69.189	85.775		-65.319	-109.339	10.065	-52.706		46.509	-56.054	-217.558		64.845	92	29.035	-13.274	-32.455	-105.612	-159.19
75.733	-140.692	-225.88	-5.174	132.025	125.667		-46.416	-105.539	50.453	-30.41		42.776	-64.921	-94.546		35.417	170.23	8.635	-33.889	44.688	-131.069	-129.784
75.867	-260.066	-234.712	51.004	22.438	110.158		-108.466	-100.516	18.057	-50.246		39.332	-47.479	-122.776		-21.402	110.933	40.177	-9.844	-16.031	-76.206	-94.236
76	-235.716	-123.726	-120.479	-40.386	77.207		49.725	-107.397	65.651	-20.304		29.795	-15.814	-110.625		-31.852	48.357	-131.659	-42.274	-123.655	-77.152	-51.553
76.133	-241.627	-311.489	255.253	75.248	70.434		-85.808	-120.928	49.611	-19.64		45.593	-18.012	-28.745		-33.218	55.374	150.937	-4.754	247.288	-17.606	-33.2
76.267	-216.881	-151.863	76.416	-61.555	130.127		-76.027	-110.907	54.793	-42.024		31.099	27.54	8.246		-19.886	17.432	-12.418	-4.116	26.749	-92.363	-15.629
76.4	-175.713	-221.999	106.096	-2.757	121.132		-111.272	-67.961	25.133	86.69		-1.556	6.697	8.873		156.486	13.974	10.263	48.705	92.576	-124.822	2.459
76.533	-273.127	-220.01	27.215	95.691	95.149		-29.928	-53.838	3.052	-25.048		17.148	47.287	-41.5		-26.654	31.183	8.411	6.864	49.229	-29.226	21.958
76.667	-119.766	-238.612	32.307	-8.096	24.403		-67.95	-70.085	-82.67	-6.929		23.538	13.767	32.233		19.648	2.385	-3.037	3.822	35.268	-64.554	-110.262
76.8	-235.949	-246.793	5.254	-8.108	54.042		-11.981	-94.159	2.807	42.493		59.309	38.645	22.153		41.41	21.336	3.398	7.207	654.908	-21.729	134.364
76.933	-250.813	-229.733	-14.574	19.771	98.867		-35.906	-57.592	129.702	51.774		-19.793	53.821	-9.102		-12.709	13.517	12.969	16.721	147.952	2.509	22.999
77.067	-296.987	-217.8	35.015	-21.47	165.536		-29.261	-42.551	40.029	-102.385		42.428	42.323	66.254		-66.969	-1.147	-8.992	69.244	-40.698	21.869	-50.056
77.2	-333.328	-135.694	86.726	-2.284	83.829		-113.021	-49.283	69.771	83.37		34.389	40.402	54.8		-29.932	-11.043	20.157	63.859	-218.672	25.016	132.78
77.333	-121.447	-38.337	124.592	-31.766	115.92		-17.369	-21.997	67.314	-9.465		13.431	-28.355	-42.888		-95.425	11.072	-22.643	17.968	-137.821	13.769	246.585
77.467	23.968	-22.824	109.946	16.578	55.478		-15.737	-55.213	67.892	-13.299		35.5	10.09	21.327		-63.931	9.684	38.703	10.412	132.802	41.428	-71.594
77.6	36.601	25.43	135.974	-42.737	53.179		92.732	-26.548	58.355	-11.166		30.251	17.319	23.054		-158.57	-34.184	-9.811	52.063	91.301	-2.15	148.493
77.733	91.207	-6.568	127.725	-13.834	79.374		25.098	3.904	29.326	-47.602		16.673	-18.622	49.072		-57.358	5.164	-15.896	8.585	75.085	91.181	36.86
77.867	68.7	28.727	91.851	-33.659	72.415		42.189	12.087	29.263	-123.39		62.956	36.991	101.6		-107.862	-25.986	-6.503	-21.686	83.969	126.329	4.457
78	51.005	32.909	77.007	52.048	98.537		26.03	14.777	44.805	24.764		-17.556	-15.054	71.01		-61.62	71.981	-4.512	-12.423	67.854	46.532	15.208
78.133	69.577	45.16	-2.232	-117.647	64.782		23.013	-14.289	28.045	-6.706		35.313	37.284	83.831		-65.605	-78.721	31.005	39.926	70.584	46.746	20.152
78.267	71.49	-18.169	-22.329	-169.315	58.457		-21.21	-7.898	11.251	81.969		45.706	58.23	61.747		-39.89	160.665	-319.081	77.27	69.832	44.802	39.273
78.4	109.653	108.979	-210.625	-216.176	32.928		25.528	28.684	49.836	107.876		24.663	27.546	-33.971		-27.496	-34.177	-531.353	37.009	101.285	42.114	-65.652
78.533	51.485	78.072	-300.688	-190.14	69.08		76.267	53.898	50.52	8.041		-26.807	54.038	-14.655		14.032	-229.604	-339.125	35.57	119.204	-12.979	52.477
78.667	95.085	108.719	-109.06	-179.842	92.1		-14.758	-24.35	62.042	-4.549		-1.609	-56.156	-71.452		-35.465	-125.481	-394.968	64.854	131.702	70.696	249.06
78.8	58.113	158.488	-24.699	-58.737	146.801		69.885	-4.11	38.435	16.716		10.265	15.188	-90.452		46.786	-403.39	-278.836	5.61	149.741	8.747	-156.687
78.933	71.648	126.982	1.359	-207.925	117.968		88.636	-13.004	38.201	18.868		12.406	-15.375	5.359		15.648	-112.426	-263.799	29.003	131.418	-7.739	85.531
79.067	74.098	135.88	-2.553	-103.492	69.068		43.713	-9.802	11.873	3.412		6.81	11.894	51.473		24.119	-188.204	-220.142	24.218	92.212	17.148	147.181
79.2	127.073	117.612	1.608	-165.565	114.304		58.176	15.426	1.196	88.24		-3.17	41.927	79.316		-49.557	-321.347	-191.313	13.895	171.058	-19.924	-10.712
79.333	109.656	101.41	-28.248	-61.347	108.388		132.893	3.741	43.432	-69.716		16.124	-16.337	43.567		19.296	-166.72	-122.132	10.783	-31.131	18.624	31.914
79.467	146.682	122.615	-130.575	-88.257	149.159		73.231	48.782	35.936	8.385		23.446	25.81	44.862		7.094	-243.966	-114.792	-24.986	185.198	13.752	7.054
79.6	133.261	164.674	-120.901	21.139	99.874		-44.117	-0.992	25.771	5.896		21.211	-27.709	-1.012		14.225	-153.215	-131.291	-11.356	-20.343	-3.084	60.205
79.733	161.831	83.201	-93.664	-181.733	58.501		47.038	51.038	15.48	5.526		-16.668	-26	-22.83		14.004	-80.066	-120.349	43.588	107.389	18.077	18.355
79.867	130.67	84.886	-118.513	-83.834	48.356		78.748	1.851	-26.382	2.331		18.328	73.563	-34.715		-55.005	-135.602	-113.258	-8.371	-12.266	-17.173	-88.316
80	82.998	55.975	-249.013	-24.337	59.864		112.423	7.318	-10.056	15.101		43.657	83.605	-114.088		11.593	-150.381	-103.097	6.335	-12.392	-7.21	127.454
80.133	53.248	70.341	28.618	53.168	47.871		64.404	5.509	-13.63	4.937		-10.533	71.998	-128.727		-14.505	-262.023	-60.037	49.033	180.984	22.384	17.924
80.267	61.817	66.603	-43.824	-92.085	134.698		78.541	6.817	60.882	-14.631		24.243	62.55	-160.537		-51.369	-217.119	-97.919	42.61	81.261	-20.757	130.587
80.4	86.655	32.646	-68.852	-21.207	80.433		57.554	5.776	79.102	12.479		22.538	25.446	-149.338		18.272	-196.713	-89.962	94.967	15.78	14.246	84.38
80.533	56.228	-20.663	-75.87	-12.124	133.74		21.46	11.678	113.197	2.905		64.7	50.08	-105.263		40.005	-184.251	-112.549	40.31	7.303	-11.177	99.329
80.667	-23.651	39.658	-99.713	-20.907	111.106		46.371	-13.489	99.169	3.314		7.647	7.981	-127.891		-18.102	-143.151	-132.381	21.574	22.085	59.868	74.038
80.8	62.625	61.044	-129.65	6.57	128.673		-9.324	-13.427	66.481	9.091		6.221	20.65	-55.728		41.233	-83.208	-136.643	55.057	22.06	46.688	98.64
80.933	80.947	104.958	-131.172	-2.706	222.173		37.262	-26.145	24.184	7.334		12.808	-35.541	-91.313		41.773	51.939	-118.711	7.708	-198.641	90.922	-13.506
81.067	97.663	124.992	-100.092	2.365	-7.153		32.772	9.414	46.868	9.352		42.95	40.189	-41.566		35.673	75.45	-25.833	23.655	-252.392	48.261	169.967
81.2	46.347	95.881	-154.355	-27.747	-10.99		4.141	-5.769	-1.751	-1.685		35.41	19.641	-18.278		9.143	77.851	-53.542	87.052	-267.572	-125.784	59.633
81.333	9.212	122.616	-245.224	-201.497	43.653		-21.906	6.846	69.432	-4.134		-10.957	-18.931	31.259		18.296	86.531	-12.044	-20.078	-124.955	-30.598	22.309
81.467	50.438	29.24	-79.792	-277.73	69.439		12.383	55.337	15.146	11.913		-11.715	-4.751	18.256		-21.793	167.358	5.223	39.574	-398.144	71.415	76.663
81.6	-41.113	85.819	-167.446	-222.789	83.548		9.882	22.248	1.477	1.709		0.456	-6.624	61.607		25.316	178.623	-40.82	4.391	-215.412	17.179	47.752
81.733	-223.64	72.257	-167.481	-72.256	44.948		77.705	27.54	-9.71	6.535		8.885	30.645	11.957		5.422	194.492	5.374	18.442	-154.003	46.424	22.658
81.867	-247.215	77.954	-175.056	-191.936	75.938		-19.428	16.964	-6.75	104.658		-88.815	-26.632	-1.146		-12.395	103.79	3.687	-5.863	-129.518	42.286	24.067
82	-238.802	89.529	-49.957	-7.123	108.861		-65.364	47.304	10.813	-97.077		-216.525	10.182	-44.763		-16.054	71.424	-19.168	4.25	-89.98	13.504	-25.381
82.133	-241.423	124.683	-40.46	-143.798	91.298		-24.258	72.546	0.977	-12.026		-174.488	48.544	-96.139		43.323	332.529	70.999	11.654	-83.705	55.807	-92.286
82.267	-189.527	86.605	-66.078	-9.973	-6.137		36.613	37.407	37.138	-1.052		-187.125	32.665	-25.916		-48.809	179.479	46.314	-24.975	-54.877	16.277	91.543
82.4	-237.016	81.16	-79.637	-47.171	46.064		1.026	89.865	30.482	13.145		-100.213	40.201	-41.078		-50.66	208.025	4.275	-5.025	-144.881	37.375	-110.498
82.533	-204.197	70.518	61.406	-20.589	66.178		-13.832	66.416	26.371	-7.001		-84.824	48.708	-19.809		-60.454	171.141	27.605	16.591	-740.891	14.881	-25.918
82.667	-46.268	33.43	127.285	6.776	107.356		8.955	14.831	33.431	22.391		-51.295	59.73	-9.934		-54.829	170.053	-3.89	-2.025	-157.969	-4.999	19.483
82.8	-7.444	190.139	80.84	14.179	99.528		-10.811	24.032	61.311	85.947		-88.539	52.038	3.407		-81.002	177.686	8.731	12.128	-167.014	26.991	31.029
82.933	166.023	122.868	60.989	19.565	120.505		-4.399	58.438	-6.074	-96.09		-56.252	27.74	30.032		-4.765	173.907	-59.621	2.91	-211.621	2.829	33.789
83.067	178.327	50.551	49.352	30.862	-202.698		-9.68	44.146	4.74	3.535		-66.502	11.285	28.931		25.383	141.454	-130.344	7.84	-86.648	20.248	144.128
83.2	243.778	99.314	41.841	-1.488	-171.172		67.475	4.888	43.455	-6.584		-98.842	12.003	-26.678		-28.779	138.083	-143.657	-26.101	-65.681	12.195	35.661
83.333	123.439	50.315	38.736	20.614	-8.931		0.943	-6.42	35.829	0.897		-101.841	-12.34	9.943		96.741	165.707	-159.153	-14.874	67.778	9.275	44.51
83.467	245.329	43.374	64.808	9.258	24.256		-114.137	4.336	-5.536	4.567		-110.302	-21.042	-7.534		25.576	187.022	-120.05	25.435	80.094	-19.365	-95.351
83.6	122.467	100.429	107.872	29.156	37.809		19.031	37.742	40.386	2.769		-95.662	41.744	17.351		-35.513	171.847	-136.652	57.432	168.979	20.667	-13.824
83.733	243.592	57.6	10.68	62.091	20.611		17.536	61.554	57.35	3.396		-98.468	13.141	5.297		-14.834	146.829	-92.472	4.803	84.962	-29.925	-31.995
83.867	122.482	46.491	59.442	44.563	-11.734		-16.415	6.34	72.124	1.885		-85.705	-11.267	38.458		14.824	142.837	-208.126	-11.535	47.739	14.83	-60.961
84	3.826	91.826	13.256	-1.359	47.589		-35.644	6.844	25.639	-9.156		-6.272	6.761	-25.183		97.332	141.415	-170.02	10.632	31.84	-22.949	-180.732
84.133	4.774	20.943	169.15	23.342	28.369		69.168	5.442	38.924	-1.802		162.46	11.354	-16.328		31.283	-12.233	-115.716	8.829	34.649	16.611	-250.89
84.267	6.452	74.766	73.832	6.368	57.86		-14.21	-1.456	66.166	5.635		108.51	-10.904	-6.397		54.906	97.107	-121.933	-22.146	4.382	-56.438	-236.678
84.4	2.36	42.351	92.538	21.71	62.283		-108.189	5.554	31.864	2.315		80.503	-18.88	10.696		-10.119	33.946	-95.775	23.297	77.943	58.378	-128.88
84.533	7.268	10.523	60.529	23.915	52.982		47.658	7.637	23.178	-4.472		59.181	0.603	30.908		22.312	69.22	-130.869	-6.086	158.88	5.689	-190.099
84.667	12.111	16.455	115.727	-6.059	31.671		-9.73	31.136	-16.472	-17.839		112.106	-30.306	12.881		192.589	144.864	-135.837	-33.656	119.9	-23.421	-117.409
84.8	11.04	29.603	31.182	-5.008	64.429		-31.314	10.948	20.246	13.834		60.871	-25.569	60.544		74.608	258.745	-58.538	17.082	145.313	-24.423	-109.139
84.933	241.323	70.798	13.923	-5.842	83.286		-23.42	18.273	-63.7	-13.923		34.13	2.643	63.882		-156.368	39.933	-84.084	55.4	156.273	13.304	-191.527
85.067	241.295	85.695	29.225	35.27	103.663		-52.09	50.034	83.853	-18.895		55.441	90.55	66.386		58.863	87.468	-23.628	-41.626	108.149	25.194	-185.506
85.2	121.498	93.037	17.066	-17.329	74.085		-50.157	2.258	14.079	23.109		56.194	7.752	22.204		-54.043	183.075	58.324	52.595	92.83	45.919	-122.428
85.333	244.139	89.291	-12.444	36.509	63.445		-134.68	27.002	-1.097	98.783		54.929	20.814	57.454		43.101	60.038	-137.776	70.142	129.038	45.075	-150.574
85.467	-1411.45	94.647	5.241	5.9	38.741		-22.352	43.186	-10.42	4.059		79.741	7.775	-15.789		108.851	10.463	197.744	16.739	121.139	70.444	-40.81
85.6	240.783	115.742	2.874	-7.31	50.773		-21.183	23.275	-10.763	-14.753		105.797	-14.697	9.872		-91.101	24.001	50.574	29.251	185.204	31.942	90.441
85.733	209.573	83.905	34.928	33.09	54.821		1.48	-7.238	4.632	-62.211		107.571	7.713	23.616		121.696	109.119	71.347	47.991	120.863	25.338	-98.693
85.867	175.762	119.296	-7.561	-8.708	73.578		-19.741	20.347	-14.229	3.563		108.26	-10.062	12.31		-16.838	103.842	11.891	27.694	83.472	30.761	10.108
86	178.414	107.365	-29.188	-18.254	37.982		65.441	-18.735	-4.738	18.7		59.801	47.189	13.282		21.743	82.481	32.873	9.419	74.175	-21.183	19.93
86.133	201.122	87.853	-31.232	-15.751	52.05		34.465	66.911	16.412	23.505		57.986	-11.602	24.166		28.914	70.177	15.578	-25.797	98.826	11.857	-20.101
86.267	209.591	108.021	-77.586	-30.949	88.722		10.219	33.977	4.782	17.408		64.132	-32.004	30.107		-15.738	192.091	74.161	21.973	13.972	5.474	-18.201
86.4	130.991	82.252	-75.207	-103.592	97.084		7.372	39.932	-6.515	5.993		22.321	16.583	51.036		-1.637	107.05	32.922	20.177	84.777	-12.512	81.472
86.533	90.978	91.744	-213.511	-138.55	109.595		4.575	-11.562	-84.863	-1.205		55.236	20.897	40.005		-83.153	218.614	36.371	-11.271	49.188	-29.024	-77.186
86.667	37.957	94.053	-139.245	-133.869	101.247		115.445	37.114	91.425	10.962		-6.066	-32.808	55.972		14.607	65.049	-135.157	-12.762	138.534	-8.287	175.48
86.8	25.509	75.855	-232.495	-49.299	-180.24		38.544	47.252	-12.344	3.142		21.935	2.898	44.194		8.257	62.984	154.056	27.501	114.931	-7.983	129.425
86.933	130.3	120.636	-247.873	-85.312	-269.431		27.939	94.989	11.486	-9.653		47.7	11.218	-9.972		32.559	42.339	12.507	36.066	107.891	-50.309	-2.604
87.067	76.819	81.261	-177.392	-27.459	-309.706		58.449	19.29	-16.81	-9.893		22.411	-1.605	35.782		31.465	43.996	-217.579	-39.524	58.803	85.131	-91.228
87.2	68.347	96.861	-127.321	-6.879	-296.676		17.855	37.001	4.14	-9.544		-14.875	-17.085	5.849		34.133	89.303	-247.261	6.476	412.786	-6.872	-6.191
87.333	10.596	101.092	-128.49	28.394	-345.047		-51.733	36.944	-6.115	2.408		12.127	1.136	49.931		20.425	160.09	-240.561	-4.33	-390.769	116.602	84.441
87.467	16.644	97.556	-132.68	58.885	-250.868		71.436	20.557	-14.66	43.091		-6.8	-2.687	36.063		42.569	43.274	-218.688	-16.397	46.562	-20.252	7.86
87.6	-7.992	147.889	-197.638	108.34	-321.819		53.636	40.691	18.082	-17.801		38.837	-44.944	31.197		63.632	30.388	-189.52	20.368	153.555	7.725	38.65
87.733	20.586	123.463	33.833	11.117	-275.191		-39.393	64.029	22.476	-10.58		-1.628	19.207	43.976		50.218	17.379	-150.611	-19.851	134.442	42.907	-9.155
87.867	13.197	109.361	-159.308	107.129	-271.464		-167.23	4.285	11.102	10.154		-10.188	1.174	49.104		100.522	113.818	-80.729	38.898	107.314	25.954	14.049
88	56.72	134.703	-250.323	107.271	-277.839		99.93	38.214	-7.437	15.352		25.303	23.004	27.515		49.769	25.055	-10.648	-8.736	133.376	129.464	-102.059
88.133	79.911	99.592	26.557	107.05	-230.836		33.561	4.763	-33.231	-4.89		-20.405	11.001	3.092		83.325	125.832	-16.54	6.125	107.493	-81.271	67.277
88.267	47.304	127.577	-117.63	-11.257	-309.885		50.236	-12.214	19.572	-3.818		22.094	-6.894	65.982		23.495	110.433	104.725	13.718	102.401	28.101	-165.181
88.4	17.756	99.937	-83.919	107.386	-302.494		36.524	10.311	12.057	-2.675		-26.536	-15.608	54.467		36.306	56.109	188.658	-18.095	74.685	28.083	60.415
88.533	26.501	86.06	-30.446	213.881	-293.411		8.789	-15.472	2.321	-6.879		44.844	-44.447	47.548		29.003	115.473	195.839	-19.146	108.88	30.972	-109.277
88.667	64.103	60.611	-11.891	5.058	-282.313		17.299	-7.644	-38.037	-53.662		82.093	-15.002	110.46		141.351	160.22	211.583	-11.377	116.728	76.728	-146.53
88.8	85.938	65.283	14.037	107.541	-122.618		31.429	-1.534	-12.451	39.78		64.159	16.762	94.584		-84.637	18.539	145.168	50.088	128.817	19.328	-84.952
88.933	28.37	60.806	66.459	-12.048	32.189		31.372	10.559	8.094	-88.137		69.426	-24.006	135.77		119.736	48.394	113.85	-40.233	87.83	37.071	-102.532
89.067	18.287	127.669	78.068	-107.12	124.871		6.92	67.415	-25.319	-198.233		68.787	-60.138	88.17		32.601	125.843	119.969	-3.545	72.878	19.021	-115.026
89.2	23.954	124.391	112.649	107.468	94.446		50.756	45.495	17.374	-81.191		-25.085	-127.506	79.808		-24.471	127.777	76.092	3.839	75.227	70.702	-75.457
89.333	102.758	103.051	-28.872	68.962	33.116		6.235	-222.283	31.273	50.427		49.753	-186.908	59.83		5.985	121.473	101.307	-23.89	129.878	6.047	-68.307
89.467	88.986	-24.878	224.893	-6.062	69.782		64.228	-57.022	-5.039	-74.513		61.096	-89.38	79.213		40.236	97.847	180.305	28.879	50.281	94.518	-22.358
89.6	83.73	3.874	12.932	5.618	31.942		34.857	12.351	-9.309	-114.068		-31.435	-70.335	91.761		128.876	-22.508	58.963	-89.448	10.919	-3.819	-65.735
89.733	79.215	71.39	104.975	22.997	21.749		18.98	5.63	19.354	-114.154		-16.349	-69.499	119.375		-71.521	64.199	37.397	-4.775	48.564	13.708	-70.964
89.867	185.235	70.215	66.734	5.354	7.107		2.236	-3.138	-18.456	-95.833		-67.846	-9.479	92.472		41.258	95.083	36.253	-89.88	29.221	-2.543	-110.315
90	-58.686	33.213	80.292	68.032	-15.346		22.199	-6.664	-7.173	-183.733		-18.304	-60.969	107.261		10.663	169.275	51.502	-47.362	60.722	-1.576	-90.291
90.133	76.286	41.208	80.903	46.287	-50.165		18.333	-26.212	-6.853	38.887		-96.006	-42.443	92.805		21.412	132.121	49.173	-82.604	17.26	-13.347	-27.135
90.267	89.103	3.373	18.246	41.052	-191.957		38.604	-36.191	-26.895	-85.503		-178.827	-95.146	58.554		-12.842	149.362	-17.376	-108.775	461.118	30.735	-51.755
90.4	39.12	-2.961	54.267	67.424	-57.129		13.208	-11.681	72.168	-77.471		-190.194	-72.608	29.931		6.106	154.012	78.891	-87.113	79.402	22.561	-29.241
90.533	8.806	-16.861	13.81	17.785	-192.094		23.513	25.956	26.048	-98.393		-255.225	-14.994	75.228		116.708	150.969	39.749	-93.14	40.499	10.971	-70.808
90.667	27.443	-44.562	-115.934	29.914	-196.494		2.503	52.316	14.8	-45.802		-230.487	-27.986	128.468		25.859	102.388	23.135	-49.638	130.875	-17.752	-73.25
90.8	232.875	-8.423	119.082	20.161	-243.846		46.258	-51.778	16.385	-25.883		-272.802	-10.175	105.611		14.545	134.508	147.873	-10.559	-56.127	94.634	-26.503
90.933	37.863	-108.036	29.047	6.072	-213.677		4.289	59.811	3.505	-44.004		-306.799	-25.869	63.229		-92.153	158.557	-31.221	-71.725	94.47	-21.22	-70.845
91.067	100.691	-112.102	-58.7	-2.225	-253.038		7.662	-59.464	48.169	-22.183		-230.378	-57.309	67.722		-23.96	105.087	115.806	-15.054	48.803	86.636	9.304
91.2	111.677	-149.913	64.642	-2.529	-328.487		32.61	96.262	10.352	-11.825		-232.525	-38.268	13.511		-19.41	107.922	33.881	-76.284	48.957	84.732	12.296
91.333	-36.438	-125.713	170.176	-13.609	-273.218		14.68	-3.313	-4.56	-118.794		-155.042	-48.652	7.953		2.476	71.037	69.656	-61.301	91.587	45.313	7.685
91.467	16.894	-201.079	161.681	14.255	-275.853		33.54	25.223	-33.687	-41.366		-106.316	-78.822	59.584		19.22	-10.76	-16.643	-31.885	55.723	-10.204	55.487
91.6	-12.01	-215.886	6.038	35.514	-334.684		51.866	5.939	-40.737	-42.216		-64.097	-24.214	23.921		22.54	83.309	60.241	-82.652	66.387	10.92	42.949
91.733	9.72	-211.976	91.173	-8.33	-249.743		42.222	-5.723	-3.02	-31.431		-35.176	-25.576	12.304		-20.995	239.768	73.326	-30.492	64.047	-5.339	80.349
91.867	10.469	-213.682	70.641	-8.274	-227.315		100.88	17.177	-23.373	-53.414		-15.152	-19.95	26.811		-3.618	132.52	65.8	-23.648	99.322	2.779	105.059
92	-24.978	-107.513	255.632	9.339	-218.581		63.013	-5.074	-16.314	-41.588		26.442	-48.121	44.185		123.839	178.417	76.851	-42.744	128.217	124.66	47.45
92.133	19.576	-107.945	14.665	47.861	-207.34		59.578	-12.539	-36.681	-31.035		6.54	12.111	12.476		-16.325	94.098	72.977	33.978	88.871	-88.778	55.702
92.267	37.833	-54.532	-64.068	-33.521	-222.826		9.091	-25.532	-1.607	-30.672		27.308	11.904	38.418		18.641	114.578	37.425	-54.351	78.867	56.578	106.198
92.4	-235.426	-43.58	53.233	-3.237	-38.762		-10.07	-4.441	-22.771	-65.428		32.471	17.978	-39.398		-26.961	116.756	22.421	66.405	49.627	86.382	76.605
92.533	-199.722	5.392	16.968	-15.054	-87.729		34.953	11.152	16.945	-50.154		69.998	15.68	-253.719		12.23	105.442	69.615	-23.262	76.869	17.288	94.032
92.667	-258.199	-31.517	42.208	-41.016	130.435		-7.716	4.694	-8.94	-43.962		-24.933	-24.371	-270.96		-15.577	78.25	32.43	-1.252	37.308	68.229	-30.096
92.8	-257.143	32.776	5.992	-174.209	130.548		-6.742	-0.311	139.314	-51.421		68.478	24.263	-260.43		5.265	88.795	98.264	-14.11	76.365	45.294	134.046
92.933	-98.283	82.158	108.076	-234.085	257.391		36.39	-6.182	17.388	25.191		13.191	-15.888	-219.811		13.59	163.129	85.337	13.738	127.168	9.285	52.813
93.067	-190.237	95.13	65.716	-122.092	129.872		-2.795	-28.784	-19.602	28.66		-10.283	13.015	-114.544		-21.76	110.011	47.366	0.488	81.734	49.665	56.044
93.2	-224.555	65.128	94.397	-164.973	105.139		-9.148	-14.116	14.452	21.495		168.533	-10.414	-174.099		24.826	117.361	69.496	15.259	72.099	60.34	-3.116
93.333	-154.192	62.772	126.98	-196.348	-19.917		12.095	-5.24	34.366	6.385		113.72	12.808	-109.41		-9.655	139.298	57.874	-16.964	124.06	2.793	-17.298
93.467	-103.866	66.287	35.597	-144.036	173.391		-2.364	-7.219	28.368	9.967		109.218	-17.764	-19.26		38.534	114.813	60.088	-20.302	87.794	109.51	36.313
93.6	-72.323	179.713	72.289	-122.5	77.368		1.169	25.119	16.013	12.309		84.561	-25.355	-88.841		-90.521	100.013	50.988	8.213	79.044	47.943	14.269
93.733	-59.787	91.76	63.762	-78.519	79.512		-1.854	41.818	41.348	-9.533		96.236	-24.319	-37.428		91.844	43.268	61.195	14.749	85.81	72.808	-20.095
93.867	45.777	132.547	24.848	-56.595	77.084		10.197	8.363	45.179	-7.776		132.218	11.637	-43.224		6.296	88.65	167.202	-16.779	44.288	52.439	6.336
94	52.927	68.968	33.394	-112.144	39.095		11.506	-10.063	29.934	-18.807		82.771	-17.987	50.684		-70.053	54.731	110.333	7.116	39.69	31.168	26.716
94.133	87.981	17.337	38.367	-113.213	78.947		-7.379	-7.44	35.565	15.611		86.692	24.735	19.385		-20.296	8.086	113.962	28.529	52.35	53.164	-8.118
94.267	191.888	54.468	24.581	-11.869	105.074		-16.507	27.317	17.849	-3.508		-184.247	10.908	16.27		6.974	16.143	88.284	-56.531	43.616	53.685	7.347
94.4	97.949	28.378	-10.104	44.162	166.62		-2.129	21.474	12.079	-7.981		-320.025	12.169	5.271		-13.512	-23.353	101.068	29.548	59.1	45.697	3.5
94.533	236.675	50.518	23.07	-24.657	225.29		-5.661	-9.432	6.512	8.493		-100.843	-19.034	102.635		74.845	-18.688	132.575	-37.412	62.308	25.269	-27.735
94.667	149.729	0.106	-6.237	-72.263	176.972		20.11	-16.907	28.081	19.058		-51.689	-21.073	21.085		12.277	27.226	10.502	3.22	-9.124	18.031	3.129
94.8	146.464	13.311	-5.953	-43.917	121.724		-29.738	11.265	-3.144	21.234		16.427	-6.403	19.251		4.039	40.561	308.922	7.595	76.924	83.743	1.455
94.933	138.05	13.333	14.785	-54.451	99.96		5.864	-13.363	7.684	-5.783		68.488	13.349	2.474		-23.909	37.463	150.705	-55.329	114.813	97.941	27.465
95.067	80.671	-25.411	27.44	-13.997	118.14		5.333	14.092	4.372	69.244		97.013	32.212	46.989		-1.408	92.78	130.016	-56.859	135.658	55.197	-12.911
95.2	-20.151	-11.781	114.313	-14.691	209.606		-20.405	-9.254	20.092	9.133		-103.447	-18.769	-5.602		-95.281	27.31	167.236	-51.278	58.586	58.868	-6.116
95.333	12.065	-5.959	27.822	-19.64	129.581		1.003	13.622	-5.47	-1.875		-216.027	-24.105	-24.007		74.849	7.571	139.39	-72.037	149.048	5.88	-56.587
95.467	64.189	-37.895	-6.132	18.807	39.589		9.374	-7.927	-6.789	145.278		-82.749	-37.871	25.221		29.971	80.183	103.606	-59.239	54.214	44.094	-100.77
95.6	82.976	-130.879	98.338	142.108	158.703		-14.167	-6.089	13.539	71.855		-83.125	-115.458	-36.688		27.308	149.636	39.067	15.72	22.682	35.306	-118.2
95.733	115.901	-134.875	51.284	33.926	106.204		-3.57	-4.215	-138.061	52.853		37.919	-98.601	-13.123		-18.964	-69.188	25.975	-35.698	25.736	-2.07	-149.596
95.867	66.085	-183.893	-21.318	94.237	100.403		-12.807	31.752	-75.396	-2.842		33.672	-91.295	32.67		-2.578	39.426	34.712	15.654	1.062	47.862	-150.59
96	47.713	-184.131	-11.516	47.419	-121.521		-50.14	8.223	-188.461	41.314		16.102	-77.374	-18.45		-91.456	71.374	-136.296	5.228	-18.361	124.597	-169.351
96.133	90.158	-197.297	128.538	27.256	225.148		-62.012	19.602	-166.743	-93.648		36.794	-136.763	-99.103		134.968	166.501	115.676	-19.063	39.292	-20.128	-134.743
96.267	93.489	-146.126	49.638	-12.293	36.15		-40.32	18.093	-143.441	-5.49		59.768	-95.112	-42.839		13.187	48.276	25.685	-8.987	-3.805	69.085	-300.67
96.4	32.716	-182.218	28.126	112.479	46.091		-56.731	-17.759	-150.097	8.084		41.245	-70.613	-42.813		-104.726	93.98	13.165	-23.356	6.401	19.795	-496.262
96.533	-3.714	-179.536	14.751	224.006	45.691		-67.89	-19.62	-156.662	2.707		60.825	-60.823	-101.329		17.572	50.978	-5.584	5.926	-7.34	51.723	-283.732
96.667	56.884	-241.128	-8.285	111.953	93.2		-99.205	16.676	-128.072	-8.664		98.737	-18.313	-120.455		-17.291	52.193	-2.896	5.588	-22.379	20.352	-220.009
96.8	20.702	-174.898	-7.182	12.731	89.074		-106.381	-18.353	-182.236	97.106		137.443	-18.303	-229.15		112.598	13.524	14.15	6.882	-18.571	65.081	-236.961
96.933	108.412	-193.577	-17.331	5.447	-95.269		-149.076	-2.866	-128.197	-21.194		81.757	5.624	-134.44		15.58	80.514	-15.306	-9.571	9.091	17.112	-136.692
97.067	68.438	-170.478	35.82	-112.247	4.402		-135.765	16.829	-92.873	-19.423		68.018	-23.084	-117.784		-21.937	76.033	-26.178	-54.164	29.058	20.267	-81.371
97.2	71.579	-146.979	-7.963	112.242	122		-113.677	18.889	-70.431	31.631		94.533	36.75	-107.527		45.696	-15.835	17.263	-112.847	10.422	32.409	-283.058
97.333	53.694	-27.692	-13.454	112.361	-14.071		-129.758	-88.871	-70.713	74.579		64.179	12.523	-75.763		-101.059	83.084	-12.075	-97.146	25.064	121.73	-78.068
97.467	68.373	25.951	33.84	112.45	22.398		-161.726	82.663	-19.992	84.574		98.163	-15.637	-46.642		-5.534	95.98	-17.335	-34.006	-52.403	-84.495	45.792
97.6	74.563	62.933	44.488	112.598	-8.948		-184.452	-4.986	-32.78	53.757		114.211	47.973	-105.478		31.712	117.391	-11.908	-37.219	-95.496	26.975	-58.21
97.733	5.966	19.843	-20.848	112.654	-15.321		-191.931	12.859	-106.855	57.633		120.602	91.508	-166.524		8.295	180.139	-16.035	-81.632	-173.033	63.028	21.58
97.867	58.409	54.408	51.073	112.35	-13.372		-186.046	36.913	-79.563	25.676		103.749	73.95	-129.852		-19.533	67.29	17.016	-30.219	-200.783	105.125	183.268
98	127.612	163.501	59.818	-0.856	50.298		-187.348	-35.566	-79.109	-10.113		97.624	60.577	-146.761		-17.408	109.962	-62.429	-86.967	-170.777	85.178	128.852
98.133	142.046	69.853	3.953	112.449	-43.212		-178.641	-10.34	-20.28	-4.592		76.197	-18.252	-198.563		25.25	127.907	28.552	15.017	-140.556	57.629	88.586
98.267	116.471	28.228	58.544	-7.438	17.71		-154.784	-8.582	1.029	3.685		89.929	-22.644	-233.622		9.213	84.57	25.707	-6.058	-143.365	129.022	142.071
98.4	68.358	94.021	33.103	-4.281	-9.864		-175.833	27.393	76.314	28.838		105.783	94.251	-270.771		17.382	196.388	-17.369	-7.354	-69.406	46.143	106.455
98.533	77.783	49.781	62.682	-3.199	18.456		-148.268	-32.85	36.779	4.41		34.32	97.035	-147.507		5.468	-54.175	-42.886	34.318	5.208	42.142	131.88
98.667	174.973	9.679	126.431	-112.422	121.124		-109.254	-20.322	48.273	-14.473		108.157	169.578	-95.02		21.2	178.664	-409.283	-31.355	-17.685	77.252	116.238
98.8	92.922	29.116	38.944	2.35	40.248		-68.626	3.132	-14.603	18.163		49.989	59.666	24.058		-8.116	14.19	50.592	6.844	35.203	42.805	142.178
98.933	111.422	-59.4	-7.795	112.356	115.306		-69.802	-33.241	-91.426	-10.952		59.828	58.495	25.967		-14.948	124.925	-165.731	-12.147	9.006	4.861	69.336
99.067	26.578	11.343	7.157	-2.404	11.127		-50.029	18.622	-116.18	11.4		86.458	88.096	50.439		-11.013	55.575	-171.425	-7.707	11.173	32.912	77.564
99.2	38.964	-18.572	27.044	4.123	-62.956		-73.933	-78.239	-7.099	-6.091		27.864	111.003	79.311		-17.146	111.362	-235.363	30.973	69.399	33.62	104.929
99.333	87.749	22.494	32.901	112.322	-131.964		-76.508	98.275	21.765	-7.226		60.602	34.937	110.289		-12.741	101.296	-119.564	-3.805	20.733	4.084	131.41
99.467	108.147	23.182	-4.6	-112.201	-170.862		-64.522	33.715	-25.426	-9.556		55.401	31.566	134.053		-14.264	138.158	-201.309	29.785	20.795	-2.738	5.907
99.6	40.154	38.009	-56.23	-0.956	-180.719		-50.568	47.212	-97.81	53.314		84.69	5.802	205.165		1.597	102.721	-172.051	24.237	83.291	59.328	125.631
99.733	17.177	8.623	-115.061	112.308	-145.173		-66.101	-7.602	78.742	7.682		47.256	58.217	123.093		-2.853	164.682	-127.883	17.107	78.027	-33.189	5.094
99.867	25.325	110.294	-149.513	-1.033	-116.455		-42.875	-5.182	-37.146	-9.503		32.862	-23.315	82.204		104.634	95.897	-106.582	38.598	54.572	19.394	221.329
100	43.7	66.302	-127.369	-112.212	-103.469		-35.232	-10.958	-56.345	44.33		39.069	11.538	111.525		-79.299	79.345	-139.267	46.545	2.426	36.62	73.167
100.133	25.722	66.393	-143.125	3.589	-109.375		-34.447	99.649	-30.645	31.767		6.26	-28.771	149.366		10.412	-4.992	160.033	17.435	100.873	-41.965	73.064
100.267	98.502	58.627	-171.944	0.716	-65.779		-34.413	-152.657	80.899	66.717		9.584	3.488	72.078		-15.177	181.554	33.472	16.606	5.092	33.759	34.81
100.4	113.608	49.98	-193.908	2.257	-166.347		-27.475	24.119	106.059	93.216		38.898	-16.238	112.211		18.09	116.827	20.428	26.021	-20.067	13.921	47.194
100.533	124.223	-5.715	-167.436	112.34	-227.828		-14.211	-13.347	111.391	56.523		-37.644	-19.219	53.298		-3.793	137.137	-15.786	18.886	21.885	16.827	73.391
100.667	95.637	-5.993	-174.975	-112.651	-191.712		2.215	-66.611	123.559	44.386		42.956	30.597	101.419		-1.971	145.003	-16.558	11.996	21.211	32.28	7.321
100.8	80.258	-112.838	-45.754	5.763	-289.915		-2.51	-95.789	71.246	14.073		89.371	49.273	48.226		-13.464	99.532	8.974	-23.583	62.442	6.958	25.234
100.933	60.441	-111.193	7.756	112.361	-190.714		-32.755	-111.723	181.895	10.287		159.965	32.22	107.995		-14.889	127.203	91.355	-3.88	35.637	-5.813	73.265
101.067	90.403	-177.061	111.1	-112.356	-84.458		61.567	-105.618	76.768	55.336		79.584	47.33	149.371		14.097	131.024	227.561	4.753	-1.449	13.869	15.465
101.2	117.916	-209.214	55.453	4.291	-86.311		22.239	-78.93	106.457	58.477		86.432	16.517	105.556		4.76	177.806	80.808	-7.66	-6.466	-29.126	133.152
101.333	63.753	-193.743	-128.115	-113.58	-203.083		21.062	-43.562	84.322	-51.038		-72.569	10.718	104.72		25.839	168.192	136.397	-2.059	33.865	122.92	-18.453
101.467	98.28	-158.929	181.597	-226.951	-206.416		0.921	-52.761	72.515	45.788		36.999	12.283	68.46		-53.445	141.989	46.707	30.55	35.774	-87.482	132.42
101.6	81.318	-153.313	71.059	-105.004	-235.467		7.741	-81.272	97.2	50.787		37.399	12.105	94.774		52.687	158.415	24.655	-3.446	19.842	-1.717	-133.295
101.733	55.969	-195.527	118.578	-307.379	-78.978		64.6	-78.005	92.74	54.771		53.276	-18.311	143.132		-68.144	-5.824	51.893	-7.304	3.439	3.441	1.383
101.867	23.789	-75.732	101.448	-227.523	-20.885		68.854	-73.526	117.727	-5.363		16.395	6.477	88.883		-201.975	160.77	162.21	20.041	-53.579	19.799	197.911
102	-21.275	-171.404	83.9	6.311	38.653		69.163	-62.741	75.409	17.492		67	2.441	58.831		-20.673	114.41	71.8	-33.463	32.351	-30.002	23.608
102.133	98.512	-67.842	-27.2	-113.44	213.609		23.155	-119.615	73.501	-6.617		170.805	5.594	83.858		-36.319	100.318	29.671	14.946	64.925	11.458	-20.17
102.267	105.327	-126.688	-16.205	-338.08	86.948		23.298	-131.329	42.301	13.597		-99.625	18.619	89.33		-20.388	93.442	51.203	-31.623	13.414	-3.342	30.054
102.4	210.34	-40.332	50.574	-110.502	47.998		60.892	-95.961	-8.788	22.737		29.101	17.467	75.692		-2.464	89.608	79.661	-46.205	31.043	-8.298	-24.816
102.533	98.427	21.903	22.197	-112.483	43.479		52.879	-112.166	40.031	107.365		37.899	-7.892	66.9		1.52	101.879	143.474	-7.271	19.252	0.757	64.003
102.667	95.094	36.751	-5.33	-3.377	28.598		33.975	-131.997	58.458	-120.858		15.134	11.031	2.881		7.206	76.679	105.906	-56.473	56.01	24.859	127.192
102.8	69.028	43.789	146.753	-113.697	28.121		-17.645	-53.807	45.67	-10.872		23.981	-11.634	-72.181		5.756	170.664	100.259	-84.034	-3.954	21.16	-125.652
102.933	90.479	119.727	142.432	-115.758	28.946		40.639	-42.934	9.678	122.172		18.073	11.737	-50.588		139.003	64.052	51.431	-132.441	19.15	1.854	128.696
103.067	69.567	13.068	117.689	-6.113	108.923		27.486	-46.707	22.245	-10.354		34.334	-7.749	22.095		-121.743	40.628	78.131	-30.63	10.726	-26.338	38.573
103.2	86.818	229.608	66.976	-118.781	85.767	10.58	11.13	-83.503	58.436	-2.614		6.824	-11.309	-106.806		16.414	-52.504	87.491	-136.499	41.018	23.594	52.89
103.333	135.038	337.394	-9.667	-22.761	61.945	640.027	10.997	-35.899	18.02	-120.311		37.101	20.618	-124.53		-9.094	64.645	55.517	-33.419	-30.979	2.987	-14.651
103.467	87.929	23.875	49.43	-11.514	76.685	113.977	-3.557	-47.136	8.114	113.374		27.396	-5.756	15.988		-16.188	132.065	-10.951	-71.116	16.417	3.696	24.29
103.6	98.554	17.051	-63.768	-4.086	53.862	110.205	-31.555	-70.087	33.295	-26.559		59.185	5.198	37.142		9.507	182.767	17.345	-34.837	24.639	-9.837	26.971
103.733	95.164	113.597	-9.737	-3.363	184.228	220.718	4.984	-40.426	42.41	-3.97		172.698	-13.949	76.976		5.969	143.197	42.031	-51.662	103.69	-9.348	-24.507
103.867	92.746	-113.156	28.626	113.514	169.091	118.274	-14.133	-71.719	-14.114	-81.702		96.409	4.749	103.116		-1.339	126.981	132.623	-38.132	49.088	25.671	48.408
104	105.725	227.52	134.539	-115.301	175.561	-28.319	-65.471	38.516	-11.165	52.325		27.282	19.258	20.196		84.541	72.667	-8.504	-53.91	82.937	10.474	13.732
104.133	48.801	113.356	-67.619	114.034	94.294	112.381	131.838	-9.456	-25.01	-19.934		51.4	19.79	-8.091		10.913	154.864	204.515	22.312	37.511	-3.213	-46.661
104.267	112.76	-15.32	83.386	113.497	180.537	223.461	-7.25	-42.088	8.115	-43.392		26.925	0.761	26.228		2.134	201.837	52.289	8.443	48.767	31.099	45.024
104.4	73.575	112.206	4.64	-114.516	158.661	-111.34	-11.096	-19.078	39.701	-26.874		29.232	-14.177	22.047		-108.486	87.682	31.699	7.255	81.501	-17.36	40.676
104.533	75.159	2.509	15.459	225.972	121.961	223.62	-228.393	-26.629	-9.947	-27.576		32.451	-32.782	53.074		-18.889	96.971	19.519	13.82	80.49	9.052	66.202
104.667	60.819	15.563	11.831	225.866	109.695	115.92	113.597	-5.544	4.239	-7.655		-96.907	5.14	14.755		-4.058	101.032	-19.689	-18.915	73.292	-29.751	5.796
104.8	83.73	-1.965	4.902	8.805	51.555	111.609	-110.959	-19.513	112.524	-95.188		11.295	32.634	50.218		-9.307	51.742	31.918	-128.403	71.905	-2.914	37.774
104.933	52.16	10.036	42.779	11.443	82.192	223.619	7.232	-8.774	-111.393	9.735		10.608	1.905	80.462		-3.621	27.059	38.297	116.64	23.426	-23.056	95.833
105.067	80.475	442.941	-22.809	3.894	254.833	70.512	-226.513	7.739	0.197	45.124		-6.074	45.022	32.093		22.211	182.681	-16.355	-20.051	55.375	56.304	54.872
105.2	101.572	113.697	186.206	155.79	154.319	78.69	-0.73	44.349	-0.967	90.045		16.72	10.977	44.715		16.641	147.337	3.527	-20.5	78.007	30.002	-1.97
105.333	62.482	-4.892	10.286	-14.892	52.063	115.43	-224.509	-12.482	7.219	25.286		145.435	-24.11	84.705		102.317	164.182	-138.252	-5.292	67.541	-1.601	-187.437
105.467	81.862	112.805	110.044	101.013	118.667	79.688	-112.607	8.039	-6.003	15.599		69.379	31.235	152.094		1.967	142.806	158.642	-0.94	83.665	-5.206	-201.485
105.6	108.497	113.093	34.77	81.309	96.465	77.734	-224.815	2.71	-5.577	6.008		84.229	-12.192	92.727		-121.569	105.438	-1.854	8.967	86.263	4.32	-59.992
105.733	85.359	-2.546	131.463	59.929	232.688	96.349	-9.576	4.225	3.748	3.357		63.726	-13.471	94.931		-4.743	131.369	-38.692	-21.819	55.845	5.557	-17.971
105.867	134.008	-227.734	-20.451	45.861	191.264	21.616	-113.701	25.783	-12.404	10.627		-97.03	7.677	103.023		38.633	142.05	-10.891	32.197	116.601	-31.867	-35.626
106	107.729	113.909	25.72	91.301	143.253	12.598	-15.713	23.376	3.169	13.191		50.81	5.14	135.303		-32.233	72.822	-39.702	9.87	41.082	18.344	-31.315
106.133	132.24	-6.518	32.853	6.925	177.061	12.662	-113.641	7.491	5.468	-27.044		104.385	-18.965	142.441		40.966	98.914	-41.835	37.642	54.527	31.272	-17.362
106.267	127.268	-7.071	32.779	56.71	147.225	56.588	-114.112	25.671	1.7	-116.402		39.48	-22.621	129.139		9.278	130.792	-70.107	34.085	76.117	44.608	-11.094
106.4	154.433	113.453	-16.831	86.322	126.241	-27.283	-226.21	-20.809	111.47	-33.571		72.444	26.453	85.054		12.451	128.053	-187.759	-5.061	48.749	27.391	81.242
106.533	172.251	226.679	23.308	-11.836	31.687	-115.489	-113.574	-9.5	-111.314	-302.84		72.126	-7.873	44.334		-3.985	22.734	-232.133	21.974	58.648	91.554	33.571
106.667	27.56	226.965	-128.255	-4.295	17.073	-142.44	-112.507	17.29	111.265	-51.804		29.144	53.453	71.195		36.806	167.219	-402.636	69.285	58.432	88.187	170.374
106.8	112.602	-12.921	109.475	226.064	-32.794	-149.866	-225.002	73.813	-8.08	-155.37		145.133	-14.92	85.724		-5.11	161.127	-20.465	21.861	54.069	67.164	104.843
106.933	101.567	-12.304	-4.985	226.147	65.111	-182.222	-112.875	55.645	11.291	-126.226		23.927	32.054	66.171		-6.225	122.274	-133.521	91.469	93.977	94.535	74.447
107.067	120.647	-114.51	-67.87	-6.129	193.655	-210.933	-112.998	-18.707	113.645	-143.402		37.902	49.69	100.099		5.029	99.979	-193.117	37.294	53.722	84.798	-8.154
107.2	32.63	-4.669	15.041	-2.458	61.521	-168.89	-112.743	8.93	-111.547	-93.661		39.153	51.185	83.527		14.844	164.182	-205.541	17.279	109.088	-19.092	49.231
107.333	-36.055	-6.828	48.626	226.848	48.569	-158.266	-0.225	-1.901	110.741	-92.717		-3.054	-64.679	23.889		-31.07	116.161	-292.057	29.901	41.159	28.909	-9.398
107.467	115.134	-115.655	16.151	1.093	41.598	-140.68	-15.52	-12.15	-7.493	-170.875		-125.247	-229.465	36.505		-13.933	179.266	-229.013	9.98	85.479	-6.489	-0.639
107.6	21.248	-115.201	8.135	226.55	33.519	-332.748	112.801	-18.28	-111.928	-86.97		89.058	-166.532	72.947		-9.266	77.359	-239.923	-16.964	44.662	-16.912	-16.687
107.733	-9.03	-116.459	23.211	2.015	5.958	-219.804	-9.013	5.438	112.056	-109.294		60.402	-48.993	13.25		-30.28	133.247	-254.482	29.052	98.899	44.518	25.256
107.867	-187.41	113.396	78.421	225.97	5.462	-327.142	-20.887	9.006	29.542	-86.938		7.156	-22.116	94.016		37.369	108.511	-241.564	-33.539	86.006	-26.807	-14.915
108	-134.668	113.661	-129.903	113.505	-20.212		114.907	7.071	27.934	-132.653		83.639	-27.638	136.313		76.667	136.449	-264.462	-29.225	105.392	123.157	5.642
108.133	-106.167	-12.001	130.388	5.536	33.175		-13.152	-25.126	112.332	-33.712		73.381	24.46	97.116		15.303	131.195	-124.919	71.485	66.37	-80.095	-83.063
108.267	-114.078	-18	-58.614	226.664	98.326		112.883	-115.693	-16.18	-25.475		59.23	28.793	116.045		28.243	77.137	-123.201	-29.349	100.318	20.219	-16.529
108.4	-165.608	-8.661	8.604	4.682	7.831		119.114	-95.337	-111.989	-12.604		68.087	11.08	157.759		-27.694	100.754	-119.63	33.69	47.461	17.415	98.662
108.533	-115.53	-5.247	47.035	113.625	10.191		112.982	-32.462	110.635	-14.579		57.246	-136.83	116.196		-24.687	150.615	-144.797	21.244	51.452	-8.472	-13.822
108.667	-107.49	227.196	39.428	-8.81	19.977		-11.457	-52.627	-111.436	-29.47		21.533	-191.946	136.423		-20.301	245.78	-150.104	-16.96	83.751	10.616	69.159
108.8	-50.343	-17.429	26.062	113.517	-98.206		0.549	-5.7	111.648	-36.491		27.473	-84.202	105.935		-25.271	162.894	-166.45	-77.63	94.693	-6.386	34.901
108.933	-216.785	226.81	34.482	113.409	-25.275		112.696	-27.395	-10.992	-51.203		25.883	-98.633	-18.767		-57.664	114.699	-217.13	107.578	99.841	-6.173	23.535
109.067	43.142	225.645	61.263	-1.568	-60.291		1.273	-54.578	-10.46	-55.92		130.674	-40.985	274.999		-96.649	104.917	-175.025	31.357	86.475	-7.252	54.275
109.2	-134.329	333.515	24.233	-6.912	-214.486		115.741	-76.781	-34.793	-94.558		18.538	-60.308	138.671		-76.661	124.881	-154.298	14.365	73.915	3.675	134.474
109.333	27.979	335.417	37.918	227.117	-95.804		-126.46	-104.225	-38.722	26.492		17.247	-13.876	141.98		-84.943	140.177	-135.327	76.458	92.251	51.848	95.782
109.467	-26.663	113.897	37.24	-5.961	-77.46		228.279	-49.064	19.876	-100.085		44.002	-41.506	-138.797		-87.463	125.011	-174.031	43.176	131.084	89.814	42.28
109.6	-70.907	448.812	45.796	1.164	-143.344		41.437	-56.533	111.43	-38.165		-5.136	-32.747	8.928		-69.253	123.27	-131.351	15.118	168.785	27.66	107.998
109.733	-40.984	113.166	19.375	113.444	-58.009		225.477	-64.709	-112.698	-40.977		30.28	-110.591	-11.109		13.95	157.556	-140.366	44.91	50.592	-4.888	154.381
109.867	-43.402	-9.803	3.673	-3.943	-38.029		114.069	-72.062	112.065	-64.195		24.117	-92.723	-227.857		-73.536	120.286	-62.348	-15.623	77.455	38.437	78.2
110	-13.654	113.085	-4.441	-7.053	66.772		115.898	-78.823	1.497	-33.631		7.86	-9.123	139.62		-32.851	108.164	-87.33	-2.524	17.974	-49.076	217.411
110.133	-33.913	-1.972	25.979	113.059	75.191		114.307	-53.438	-15.831	-21.472		16.542	14.978	-10.317		-133.778	138.4	-35.026	11.68	73.783	65.617	83.048
110.267	25.217	-4.81	50.717	-2.906	68.165		112.552	-84.355	-5.191	-23.368		-114.974	16.336	137.805		-22.949	101.473	-22.746	0.532	18.206	28.263	63.83
110.4	-34.03	-12.514	57.256	-2.037	28.259		113.416	-54.387	-6.862	-14.019		36.195	29.691	137.413		-3.08	127.534	-2.898	14.65	49.952	-17.416	58.244
110.533	-24.024	-12.231	42.634	113.329	144.976		112.771	-59.968	-5.251	-7.45		-33.959	36.169	137.236		-24.134	170.573	51.636	-9.783	-20.594	16.397	99.451
110.667	36.008	2.725	70.965	112.479	151.975		111.937	-27.175	112.14	-133.514		143.545	-8.083	21.031		-41.279	88.75	-4.4	-17.102	76.244	-10.138	21.528
110.8	-26.608	2.612	12.739	-113.642	154.045		112.423	-46.54	-111.163	91.919		-144.274	-30.138	17.421		41.686	115.053	235.979	-12.255	32.804	21.032	9.578
110.933	-5.431	-20.625	-9.527	113.969	116.773		112.441	-99.411	112.284	6.997		35.123	7.295	137.963		25.985	132.85	119.688	25.445	53.75	-9.937	95.117
111.067	-2.252	-12.566	5.674	-0.616	105.725		-113.477	90.34	117.876	99.986		18.774	8.617	20.832		85.003	59.123	121.898	14.715	38.514	-78.88	-69.805
111.2	23.671	12.258	41.858	-0.549	119.765		113.383	-38.678	-20.982	-92.43		11.644	18.696	141.428		-8.629	71.432	114.77	19.123	61.502	-19.242	135.757
111.333	19.687	-333.677	37.264	4.497	118.656		112.869	79.409		3.987		150.119	16.319	-137.805		92.682	55.365	139.842	-41.12	29.23	3.361	13.729
111.467	70.233	5.741	40.625	-3.885	11.811		-446.692	-21.711		-8.895		-10.199	36.338	138.263		22.994	54.559	63.129	16.255	-10.187	8.26	-10.679
111.6	89.952	-115.888	16.237	113.533	60.016		116.232	-95.606		23.027		-8.049	42.312	16.377		7.282	96.566	107.335	39.316	2.76	9.665	3.705
111.733	60.334	-224.807	38.878	-115.637	84.404		116.217	82.345		14.899		21.056	23.015	11.415		-15.27	67.793	17.666	-11.538	-13.031	-3.288	39.425
111.867	88.393	-112.436	3.832	-0.449	117.465		-230.005	-19.446		35.89		19.597	77.586	139.265		177.259	51.511	109.84	-2.931	-25.464	5.826	-55.894
112	86.518	-117.151	-15.609	114.089	212.111		116.759	17.38		11.687		-143.69	42.673	138.973		16.848	127.462	266.953	14.302	17.175	37.269	20.878
112.133	53.319	-225.997	-4.958	-14.849	83.093		-342.031	-23.315		24.514		-19.824	117.871	6.411		12.796	-83.346	48.603	33.654	-99.788	51.258	-52.861
112.267	68.633	-226.714	22.117	-113.74	82.438		232.012	26.706		3.691		41.774	93.275	138.182		47.651	46.867	67.516	-14.119	-14.895	-13.318	-225.739
112.4	76.754	-115.441	121.527	113.923	100.428		11.846	47.084		19.961		20.228	141.497	137.648		-79.442	148.268	133.127	22.994	-57.093	-13.129	-91.182
112.533	76.377	-17.543	50.035	113.7	98.788		-114.844	-4.395		-2.139		13.894	76.417	-2.088		80.932	2.699	133.139	7.809	-122.943	-9.811	-135.376
112.667	64.689	-4.762	64.488	-113.827	98.413		-230.995	-12.457		13.12		-15.746	122.21	137.061		126.427	-51.61	-8.098	12.378	-76.581	23.465	-168.887
112.8	18.003	-226.708	46.098	-1.701	42.323		-115.945	10.065		14.452		10.54	71.944	136.762		-118.202	56.411	-17.446	66.078	-132.088	123.96	-156.089
112.933	-21.888	-114.465	5.448	113.421	3.895		116.862	-34.097		7.534		39.641	52.074	408.264		26.757	6.029	-12.276	12.239	-53.688	-125.695	-188.233
113.067	-13.374	-339.709	26.849	-2.162	41.042		4.265	-2.233		1.377		-40.054	8.977	-138.274		33.994	-5.226	-14.367	-15.818	-77.667	26.609	-47.383
113.2	42.965	-227.326	27.425	114.082	-98.416		231.583	33.77		11.77		108.148	21.881	137.759		40.758	102.857	-1.969	-13.027	-33.176	5.947	32.931
113.333	11.531	-337.088	-13.224	-0.654	15.36		230.951	-88.438		-16.604		37.707	22.809	-274.688		106.708	47.41	6.512	24.663	-90.932	-9.392	-9.878
113.467	39.082	-230.533	106.277	-113.337	-3.81		-115.828	-5.935		22.796		-124.883	-21.745	8.65		-53.23	-27.718	3.73	46.347	-148.777	6.043	69.47
113.6	46.052	-116.249	-19.414	113.563	110.235		3.111	69.877		7.472		40.888	23.265	1.518		3.721	-87.541	133.719	24.441	-139.281	8.034	-132.934
113.733	28.738	113.331	27.077	12.021	-21.481		-115.771	-0.973		9.669		-48.742	48.118	3.848		79.552	66.018	-3.758	53.818	-134.634	-3.648	-84.651
113.867	-7.132	-116.688	63.125	-0.682	-5.71		-228.853	-98.423		20.404		-27	2.683	2.454		13.357	20.226	133.216	35.413	-120.006	-0.168	-121.357
114	51.621	-20.699	-19.552	-226.218	-7.833		231.907	25.891		-1.641		8.186	27.766	6.49		-12.782	129.953	132.821	11.384	-82.092	-124.116	-171.223
114.133	57.542	-10.6	7.078	227.962	-46.593		14.634	-11.376		-22.695		42.718	12.339	137.952		-81.607	-38.598	13.326	1.109	-79.703	124.806	-132.93
114.267	123.676	114.649	58.421	114.031	-3.53		-115.045	-25.555		-31.163		3.162	22.429	137.128		0.462	70.165	133.103	15.781	-9.843	19.772	-176.777
114.4	40.106	-0.754	54.976	-114.935	-80.772		-115.139	-25.171		-17.497		37.004	-20.63	-138.085		-0.57	43.309	134.096	47.572	-12.294	-18.097	-151.104
114.533	62.451	114.029	47.258	113.754	-65.495		3.137	47.894		-10.126		-28.813	-6.86	136.897		-6.76	16.315	134.152	21.789	9.294	14.388	-148.711
114.667	150.179	-10.183	132.986	-10.678	-167.527		-343.013	-109.299		-7.22		147.656	-15.501	-0.508		17.875	125.887	134.257	-9.365	-14.535	1.073	-83.374
114.8	73.449	-5.804	-98.659	-7.154	-112.578		8.092	130.409		12.686		-151.544	-20.917	-137.224		-7.203	-54.484	133.444	10.145	-13.638	16.371	-121.513
114.933	-13.346	-3.705	-11.179	-4.184	-119.585		230.95	30.923		-23.985		-29.34	24.857	-136.586		79.109	-7.526	-2.512	16.985	44.705	4.313	-77.894
115.067	64.257	114.234	-12.793	-114.068	-185.661		340.931	-100.484		12.972		34.913	19.205	138.247		5.35	19.487	1.357	-2.578	54.105	11.129	-71.805
115.2	89.11	-4.705	-14.427	113.175	-179.228		117.32	14.033		-12.22		94.733	48.561	276.387		-120.397	90.735	133.486	-25.04	38.879	2.171	-24.888
115.333	112.962	113.474	50.545	-8.062	-155.9		119.543	56.678		33.226		-8.101	45.959	-138.661		-30.788	123.07	132.799	29.311	109.266	3.159	18.048
115.467	33.372	113.531	-16.62	3.456	-152.447		118.056	7.72		8.614		-115.452	31.889	-137.217		5.665	66.067	-266.088	9.749	67.269	8.525	55.201
115.6	46.778	113.056	13.14	5.546	-173.582		-12.234	21.511		-8.805		-22.702	16.661	4.329		-46.957	114.284	133.828	-24.682	86.067	2.128	73.244
115.733	20.459	117.448	27.894	6.31	-184.017		116.934	82.44		-15.93		20.898	-26.53	548.103		-36.806	100.216	2.153	-14.29	65.413	-123.263	66.336
115.867	57.671	441.62	-14.818	113.317	-188.386		-116.956	39.371		-3.604		12.391	30.79	-6.41		-23.751	49.961	266.214	18.69	121.855	124.473	-13.742
116	37.342	335.799	-27.445	3.86	-219.338		-229.593	-9.282		170.602		143.044	30.531	-137.134		121.927	252.011	133.444	15.179	50.841	15.167	62.925
116.133	15.025	339.264	191.604	1.154	-39.624		117.555	-7.156		34.54		-81.429	-23.233	6.65		28.365	-256.578	5.636	18.641	62.549	3.598	24.965
116.267	21.207	451.86	31.428	13.047	-284.746		346.181	55.919		-100.198		58.6	30.19	137.241		-62.427	88.654	132.789	-4.76	41.615	-123.329	16.764
116.4	49.769	229.159	24.93	1.777	27.242		4.62	22.584		51.464		59.171	38.852	-137.098		-5.094	33.045	10.254	-35.49	111.279	124.879	33.263
116.533	-5.247	227.213	23.521	3.925	-47.711		0.052	-5.755		13.037		16.781	47.382	-273.543		-119.818	134.06	266.33	-77.809	105.007	-125.423	104.804
116.667	-3.811	226.426	28.808	113.545	-43.896		1.359	-11.691		47.109		16.624	76.197	136.73		-5.58	45.138	23.12	-108.43	85.389	16.55	64.165
116.8	7.852	226.418	19.525	-1.899	128.485		-116.542	5.82		11.888		8.168	73.991	-138.67		-5.162	85.883	134.071	-112.181	68.529	16.902	66.065
116.933	9.691	113.439	2.482	-113.551	25.059		-0.316	-9.507		25.428		-9.493	44.944	-137.483		19.044	50.028	265.833	-198.423	42.042	16.916	11.409
117.067	-2.62	225.823	5.387	113.45	199.452		0.23	32.459		-5.601		11.585	3.661	-137.13		-7.858	68.161	266.315	-128.563	72.503	125.376	70.146
117.2	26.62	113.228	-6.489	1.073	183.346		-10.038	-25.658		23.06		32.098	41.262	-137.959		-3.561	54.871	133.305	-149.146	79.387	-124.077	-7.178
117.333	-7.243	226.298	-131.174	-7.8	142.554		3.392	62.349		6.241		143.729	16.402	-11.485		-8.827	122.212	397.276	-146.587	-18.01	125.682	66.626
117.467	21.716	-16.076	83.422	-5.316	83.03		-7.21	9.574		15.717		-129.203	20.143	-273.555		-9.715	92.205	399.831	-163.199	132.596	-13.432	47.427
117.6	30.535	-6.6	24.16	-8.292	25.075		116.615	-8.931		-10.739		26.121	12.735	-137.034		81.377	72.278	398.836	-134.997	52.143	-124.892	58.723
117.733	13.217	226.624	-24.063	1.64	25.751		-116.019	-10.165		-37.95		25.225	11.403	-637.557		-14.589	20.539	132.42	34.84	85.585	125.253	12.151
117.867	-19.645	113.932	63.415	113.49	37.109		-233.918	-10.725		-41.852		32.851	16.003	-103.241		-55.096	46.542	397.09	-82.16	58.244	-124.25	21.793
118	1.066	114.313	39.866	-5.755	-6.039		-116.358	24.612		-104.034		22.187	35.168	60.596		42.343	16.304	132.98	1.296	34.076	24.365	56.474
118.133	-28.491	-1.215	32.92	-4.656	2.223		6.423	18.278		-86.654		42.234	-10.091	-129.197		-8.263	16.179	132.992	-142.855	41.294	10.952	30.689
118.267	21.369	226.352	47.437	4.602	-9.273		6.519	12.079		-57.761		51.982	-9.905	-136.58		39.555	-10.887	132.622	-75.423	67.212	15.485	19.799
118.4	6.207	339.76	8.169	1.042	-0.475		347.606	44.894		-69.164		42.44	6.108	-0.305		-21.018	20.289	-7.038	-46.035	66.005	9.172	43.03
118.533	-27.886	226.157	14.417	4.952	-2.744		233.9	-11.539		-56.352		4.91	-13.317	-1.467		5.617	-38.846	5.42	-54.662	56.776	125.57	4.3
118.667	21.102	113.26	-130.437	113.355	9.742		-347.359	-3.254		-64.566		286.18	55.037	3.808		94.046	8.705	265.48	-21.535	25.569	-124.72	25.74
118.8	-17.96	2.878	123.889	-3.735	-6.194		234.226	62.002		-104.989		-288.127	-33.309	-134.173		4.54	-39.397	265.671	-13.983	123.917	12.867	22.376
118.933	-16.326	225.877	-19.923	-1.268	4.632			35.815		-96.781		30.301	-20.417	-17.085		27.474	23.108	134.06	17.535	105.927	4.304	47.34
119.067	29.242	225.832	-8.365	113.566	-17.769			92.938		-20.725		9.281	64.135	134.578		-5.366	-6.05	-15.573	-5.769	133.161	8.705	3.157
119.2	33.6	113.186	-28.667	-9.915	92.195			95.532		-19.539		13.266	40.845	134.519		-78.322	27.074		-15.751	107.49	127.02	15.435
119.333	14.843	-9.432	34.369	-114.384	4.006			56.81		-20.345		15.024	76.193	133.399		2.207	11.517		32.939	97.361	-123.468	-23.8
119.467	72.918	113.352	42.342	113.527	-80.587			57.532		-20.089		-28.604	-62.181	82.643		98.465	-84.345		-19.456	91.952	15.032	32.284
119.6	7.329	113.486	-30.331	-6.008	40.187			28.358		84.819		-41.408	210.145	117.78		4.322	134.21		-81.031	115.512	125.547	31.64
119.733	77.154	2.513	-19.956	-113.811	83.434			11.737		-103.256		-23.948	4.624	82.522		-10.061	23.859		59.428	112.728	-10.095	140.773
119.867	47.889	114.551	-37.043	-115.935	32.982			-2.46		43.957		8.851	19.844	181.324		-124.723	43.331		49.782	79.895	-125.028	136.931
120	115.531	226.843	-255.282	226.815	58.886			17.07		24.379		77.659	12.726	56.346		-17.808	56.38		-98.329	92.106	127.577	227.772
120.133	193.508	114.249	56.994	-113.523	277.951			-176.26		220.544		-567.468	-624.94	625.455		672.165	486.199		505.583	-415.552	-488.428	518.524
120.267	498.6	445.035	-571.406	61.697	496.815			-301.864		31.98		-393.789	-284.307	-173.945		74.501	67.014		-138.204	58.982	-246.475	136.42
120.4	-399.802	226.204	-2.526	-351.679	10.017			-278.985		21.741		-517.029	-323.186	-266.509		240.87	24.669		116.972	33.059	-246.714	163.869
120.533	-216.961	-42.127	-105.138	-238.924	73.438			-157.627		-6.973		-334.246	-181.138	32.328		181.008	155.258		5.713	28.631	-369.741	183.715
120.667	-83.356	120.443	111.582	-27.081	81.104			-231.512		-29.385		-328.855	-97.216	-133.56		120.924	90.763		7.6	-17.107	-247.499	234.825
120.8	-295.572	118.321	17.893	-25.221	115.933			-124.563		-25.72		-237.051	-36.757	12.707		62.908	72.692		20.353	-3.279	-495.81	200.664
120.933	-73.213	-120.906	-111.856	-121.355	40.224			-120.048		-27.518		-304.886	-9.814	-3.986		90.094	53.714		-93.402	14.38	-370.266	185.04
121.067	-174.706	41.504	-15.562	119.1	15.311			-109.134		-115.427		-218.024	-22.502	-3.566		30.26	-219.734		-205.446	249.663	-483.452	-220.226
121.2	-257.935	233.258	247.807	-10.79	-241.144			-74.458		53.305		-280.708	114.708	-43.603		-115.419	43.357		-25.161	35.773	-249.287	36.175
121.333	-99.766	-115.511	38.332	-11.947	115.662			-208.717		59.347		-17.748	6.066	38.945		142.697	11.807		-89.53	-10.62	-131.666	134.213
121.467	-90.336	-114.57	70.747	113.761	-28.041			-58.228		39.234		-198.918	-13.776	27.073		-86.668	28.891		-2.434	0.634	-127.518	-42.277
121.6	-144.361	226.638	57.532	-3.179	-19.514			-28.984		55.28		-20.847	-17.42	28.492		44.288	37.273		17.928	-34.437	-125.768	192.918
121.733	-132.859	-226.847	-48.781	-113.82	197.006			-45.922		35.759		-11.581	12.28	-134.273		20.288	23.418		-16.126	10.163	24.788	118.441
121.867	-139.187	226.673	181.099	1.697	143.537			-71.394		-4.54		-54.819	-34.078	0.829		29.37	87.646		87.184	30.636	-123.945	132.556
122	-155.949	-4.601	37.409	1.637	66.895			-73.521		-16.619		-110.475	27.941	-11.83		47.604	-15.238		-0.632	4.131	-5.983	11.85
122.133	-202.282	-4.52	-87.011	113.401	-3.522			-89.599		-37.433		-38.694	16.777	133.936		1.437	173.592		-92.973	-210.861	-5.641	-60.975
122.267	-171.009	5.806	145.061	-114.387	-7.121			-127.987		-100.083		-28.441	-15.619	-133.93		25.852	83.938		91.496	-128.284	-247.764	173.685
122.4	-215.686	3.89	28.243	113.375	14.261			-120.303		-109.961		-31.533	-21.106	133.887		6.271	-20.548		17.635	-56.473	10.77	69.278
122.533	-192.6	0.689	-36.207	-4.156	26.133			-68.924		-95.547		-52.793	25.283	-1.569		2.285	86.411		-104.658	-51.948	-123.932	37.399
122.667	-289.32	226.375	-0.539	-8.958	59.646			-8.191		-46.341		6.796	16.727	-9.579		47.571	89.72		60.649	-186.6	-123.969	122.045
122.8	-141.957	113.277	156.161	-3.536	41.137			-39.651		-73.92		-80.27	-23.961	17.675		113.378	9.311		-79.004	-188.748	-124	69.543
122.933	-100.512	113.133	6.532	-114.033	-1.994			-141.632		-53.372		-36.598	29.114			8.696	67.864		102.141	-117.642	-2.094	84.492
123.067	-86.191	113.175	20.247	113.428	24.473			-70.361		-36.762		-48.7	11.358			-52.41	23.138		4.966	-173.973	4.699	116.867
123.2	10.875	-3.66	-6.5	-114.237	-452.125			-75.623		51.501		-51	-9.156			21.305	-15.52		2.858	-241.133	-124.727	61.802
123.333	-159.937	113.491	-29.271	-1.992	-332.211			-101.15		-50.021		-17.14	22.451			15.463	149.826		-0.346	-156.872	-123.979	69.875
123.467	-103.95	-0.328	-18.863	2.605	-385.741			27.98		-46.595		-41.999	-16.513			58.749	109.176		-19.845	-153.423	2.935	136.126
123.6	-121.068	113.269	-15.241	-5.132	-345.135			-62.157		-14.848		-9.571	-15.542			-5.187	133.993		-14.542	-170.79	-92.572	77.555
123.733	-161.367	-7.946	6.881	-3.149	-336.46			16.292		-42.792		-38.82	-8.909			3.227	82.166	29.361	-149.927	-214.956	-102.473	119.136
123.867	-154.884	113.36	-5.885	-3.537	-219.083			-30.049		-122.46		-13.917	29.707			25.987	10.8	28.941	-64.78	-213.764	-73.254	90.822
124	-121.849	339.631	93.919	113.405	-330.749			-15.648		1.425		138.56	119.126			118.608	27.483	159.674	-82.595	-191.011	-121.451	107.86
124.133	-102.684	-115.646	107.521	-3.866	-267.548			-136.402		78.891		-190.525	42.434			-93.988	31.425	32.931	18.474	-109.45	-52.972	86.151
124.267	-112.278	-9.498	100.086	-113.758	-212.034			79.453		-5.677		-40.809	59.054			15.891	-67.813	44.475	-80.431	-163.8	-119.414	134.122
124.4	-168.37	-0.683	67.9	113.407	-222.219			-12.785		61.567		-28.15	-59.28			121.78	10.32	142.32	-145.71	-123.939	-66.724	154.837
124.533	-233.483	-6.308	117.571	-2.39	-214.637			-43.427		28.271		-27.961	201.111			22.547	92.018	129.968	-92.269	-38.383	-27.704	103.897
124.667	-170.079	-7.189	93.159	-0.479	-227.902			-1.375		59.71		-16.719	-31.806			-11.995	227.807	119.187	-74.173	-13.008	-55.147	124.435
124.8	-182.854	227.073	135.364	-114.21	-226.213			47.545		1.29		-56.707	249.028			24.517	54.641	50.397	70.377	51.542	-36.608	257.458
124.933	-159.668	113.486	86.578	-1.355	-212.092			-5.02		32.731		-38.594	30.504			5.675	146.085	35.762	-189.137	35.363	-337.372	-29.59
125.067	-32.071	-14.028	85.063	0.285	-246.332		20.001	37.857		52.341		-86.529	57.069			5.738	83.555	22.573	72.002	-18.748	-134.949	18.579
125.2	-87.299	-3.942	-36.342	113.397	-257.247		115.912	22.655	-12.26	4.496		-73.053	13.149			6.469	55.641	28.148	-140.062	39.741	-89.19	12.348
125.333	-136.36	113.78	27.919	-114.843	-264.009		-10.513	18.55	116.874	4.237		27.295	66.267			26.981	63.347	-20.307	62.284	48.456	10.767	98.485
125.467	-84.608	-113.509	125.981	11.28	-221.311		2.917	66.05	2.401	15.447		-287.721	-13.176			-77.639	21.864	-13.045	-4.739	13.999	2.74	128.924
125.6	-34.199	113.283	-76.042	113.554	-224.156		115.915	68.184	-116.534	22.852		-106.459	-5.614			-2.927	113.107	23.58	-33.189	-36.045	-21.719	189.97
125.733	-13.794	226.427	122.324	-114.862	-233.16		116.179	42.113	116.726	25.606		-139.254	6.723			87.048	48.922	-12.487	-10.513	-34.89	-9.066	125.779
125.867	-23.365	-7.657	-84.407	114.417	-320.402		-115.661	37.895	2.255	14.221		-35.804	-8.979			8.175	102.26	34.05	-41.856	-172.303	22.819	99.018
126	44.839	-6.721	90.065	-114.19	-252.295		1.238	8.52	-117.238	56.8		-118.062	22.731			2.933	81.058	25.238	-45.261	-181.8	-17.575	57.695
126.133	27.55	-8.05	29.78	1.332	-271.763		3.027	21.576	-116.859	59.746		-219.429	158.033			18.138	51.231	19.7	-32.577	-255.83	10.68	63.711
126.267	31.647	-113.572	1.498	-1.828	-236.485		1.432	43.424	-116.746	61.834		-113.958	41.046			5.468	121.645	9.512	19.836	-276.068	-16.605	93.045
126.4	55.385	228.017	-5.17	-1.653	-225.443		116.177	42.658	-232.885	25.989		-122.342	24.568			-15.06	76.624	-124.16	-103.775	-296.083	35.92	46.868
126.533	38.246	14.5	6.098	113.426	-200.367		-116.079	-9.52	116.569	23.985		-94.711	13.335			-95.759	23.834	162.997	21.472	-177.07	-15.454	118.761
126.667	-3.949	-0.75	-9.247	-114.845	-186.598		116.043	16.579	-232.915	7.421		-26.818	-34.671			122.804	252.075	26.331	125.328	-30.384	19.817	129.983
126.8	39.758	-40.491	-11.911	113.892	-182.263		-115.964	42.498	2.871	13.726		-172.903	-32.302			-111.887	-90.031	134.37	-13.737	102.572	-6.298	-29.186
126.933	39.042	-119.508	15.087	2.281	-272.881		116.142	24.545	-10.714	17.869		-94.482	-25.102			88.558	54.694	76.108	96.498	126.79	3.936	109.402
127.067	40.117	-119.946	-8.242	-2.564	-279.84		-12.306	-4.511	-116.087	38.402		-88.656	-18.735			11.967	23.758	38.012	76.677	86.607	1.56	85.302
127.2	34.337	-224.599	-22.97	14.855	-272.364		34.236	9.742	-94.373	50.054		-101.249	6.649			11.187	39.583	17.545	25.774	72.951	2.301	66.698
127.333	-9.821	226.774	8.44	114.486	-156.203		-5.691	60.508	-85.053	31.276		-42.21	-0.93			-18.045	111.257	-25.637	16.164	170.916	8.495	79.554
127.467	13.162	-112.555	-1.614	-0.569	-202.917		38.726	59.932	-110.899	51.256		-117.161	172.151			-105.801	78.037	-89.545	41.014	195.896	-6.911	51.688
127.6	26.784	-114.942	-4.405	-4.679	-118.759		11.488	90.568	-167.552	31.502		-64.001	-7.818			106.858	115.89	-110.395	52.112	179.376	13.326	58.995
127.733	46.476	-4.889	-6.614	112.496	-11.164		5.847	74.886	-27.435	34.326		-80.506	12.375			24.868	234.806	-161.297	17.479	93.328	9.308	136.159
127.867	16.476	113.237	-7.794	113.984	-45.6		9.44	49.628	-203.895	39.147		-119.182	-8.918			-15.555	24.82	-203.243	28.743	164.769	-15.226	77.535
128	-49.145	-114.206	-33.929	-227.453	15.761		-4.74	120.488	-91.44	69.706		31.673	-28.359			48.959	65.138	-291.531	4.181	60.2	-24.048	45.967
128.133	-115.913	-1.814	-57.742	114.018	82.404		36.836	83.034	33.046	49.362		-189.994	-6.676			-123.862	18.794	-148.489	-1.687	60.183	10.48	140.627
128.267	-135.459	-6.795	-41.032	-8.428	78.5		42.316	21.093	-122.897	14.636		7.113	-22.733			18.051	44.801	-41.219	-9.249	127.961	12.581	83.471
128.4	-203.411	226.325	27.763	-18.102	26.058		-6.402	7.658	55.769	15.362		10.579	-26.465			112.891	32.922	-190.071	3.974	94.168	-36.049	117.03
128.533	-222.358	-8.378	-72.579	113.808	43.51		52.748	90.21	47.244	9.961		-21.657	-16.134			11.416	81.002	-182.062	6.541	50.017	-37.015	71.81
128.667	-254.111	-114.483	-46.659	-115.372	52.488		8.592	39.542	51.988	20.255		15.636	71.638			-21.446	65.917	-383.511	-77.449	99.087	11.714	103.374
128.8	-191.609	-6.18	96.632	113.399	64.379		8.501	97.392	121.244	7.872		33.629	150.426			14.51	30.759	-105.022	108.195	89.504	56.93	74.855
128.933	-201.257	113.494	-130.641	-0.818	132.879		-19.418	15.122	22.601	18.589		-4.832	-3.532			-2.806	205.98	-206.712	-4.643	73.921	-7.479	100.768
129.067	-178.227	-19.542	73.209	-113.583	26.315		-26.587	79.479	101.619	3.744		25.212	15.997			-105.498	60.555	-211.655	-14.744	107.543	-36.705	112.472
129.2	-197.702	113.225	-96.446	114.05	29.999		-61.697	42.89	33.888	-138.415		27.067	35.313			101.173	-153.226	-228.708	-9.287	57.217	-10.536	89.956
129.333	-125.727	226.307	-127.888	-0.742	69.087		-101.229	34.278	77.579	-359		-10.829	-8.853			-105.214	223.168	-142.566	43.652	57.039	9.6	110.087
129.467	-80.011	-2.269	164.134	-1.921	69.668		-126.056	-13.508	42.973	-195.32		37.858	25.703			94.147	85.167	-170.832	-25.697	144.732	31.19	117.972
129.6	-151.97	-173.962	-7.025	114.166	28.077		-143.975	68.124	88.816	-66.869		18.444	3.132			7.859	-131.496	-185.075	37.641	109.879	18.09	148.288
129.733	-108.405	83.142	-58.598	113.39	76.031		-158.55	20.526	36.152	-14.691		29.129	-3.651			-102.002	256.742	-123.775	10.948	48.839	44.278	83.957
129.867	-203.346	54.753	1.378	-113.399	83.362		-187.677	9.341	59.217	19.093		59.323	38.821			114.397	157.219	-115.622	-105.147	-127.474	50.687	112.079
130	-58.679	71.679	-5.114	385.967	147.431		-189.98	65.524	60.878	7.778		67.768	-23.46			39.271	138.112	-86.21	114.479	-6.378	108.085	134.7
130.133	-20.432	22.049	1.572	20.832	114.739		-207.519	28.317	52.222	4.905		5.49	-15.105			11.909	108.95	-125.579	3.711	-59.447	117.668	123.484
130.267	-28.165	66.4	14.58	21.744	116.018		-7.818	85.904	73.44	72.375		25.129	22.487			-140.891	83.064	-123.319	-6.364	-205.92	79.942	143.907
130.4	-79.812	59.214	-15.42	5.256	19.342		-174.471	22.277	90.412	103.452		67.007	-35.66			-62.107	110.429	-140.811	-4.141	-174.199	99.293	148.2
130.533	-165.072	66.511	-12.523	27.378	44.111		-170.007	50.905	84.95	8.943		59.147	37.407			-122.355	70.962	-157.252	-4.344	-131.921	52.054	113.845
130.667	-37.402	77.144	-127.476	5.26	262.699		-149.575	105.102	50.884	87.895		15.478	11.821			-75.814	86.392	-134.862	-3.18	-147.209	25.086	84.002
130.8	-162.684	103.911	146.382	-4.224	175.627		-174.106	51.173	75.807	63.066		72.694	-39.761			-82.718	120.097	31.838	-4.836	-229.833	46.499	129.079
130.933	-99.238	53.251	-6.214	-15.191	264.629		-58.618	40.594	131.359	44.468		39.944	17.264			24.012	134.711	-27.372	14.42	-182.266	32.415	154.183
131.067	-142.735	94.544	3.787	-1.619	308.01		-101.257	53.727	79.196	44.288		29.609	2.935			-59.066	39.265	-11.386	23.478	-44.798	-7.725	139.01
131.2	-34.334	56.115	-94.443	-14.295	254.412		-65.78	92.957	55.235	21.258		28.042	-18.966			-18.983	228.552	64.696	1.767	19.906	16.746	162.532
131.333	-24.816	43.464	78.706	-9.573	277.613		-25.572	44.032	42.475	41.278		35.693	5.639			10.437	124.695	122.586	7.65	171.819	10.132	146.309
131.467	47.565	79.047	-6.569	-13.097	240.107		-0.683	35.245	66.473	-5.088		37.062	2.033			10.885	166.78	147.774	16.078	182.785	-16.598	156.841
131.6	47.185	70.254	-6.332	-21.036	228.535		-22.046	37.163	73.297	2.302		82.272	18.024			-19.523	154.593	174.342	21.637	169.843	5.665	169.246
131.733	80.868	45.373	1.562	-0.527	204.275		13.161	-32.798	29.521	18.648		24.171	16.6			21.439	167.237	119.161	35.534	104.093	39.912	139.917
131.867	-15.195	55.661	-17.431	24.985	159.461		-42.698	-5.035	45.798	-30.447		54.352	-21.692			10.24	114.099	44.234	-10.593	216.883	35.931	121.61
132	102.546	125.382	-12.069	8.335	123.424		-32.341	-22.096	26.771	-76.561		141.65	9.851			-3.214	110.27	123.822	40.658	101.28	76.98	153.527
132.133	84.725	-67.044	-7.703	1.756	217.925		38.421	3.283	76.098	-154.379		-42.247	14.943			11.991	138.395	78.312	67.578	130.768	55.061	139.004
132.267	63.735	6.803	-27.787	-60.352	162.879		9.523	-3.167	-5.265	-96.833		27.456	-13.265			11.328	17.219	69.25	-25.288	216.752	54.403	139.313
132.4	72.996	36.474	-15.926	36.909	108.38		84.674	51.828	30.932	-78.881		-5.355	18.619			8.755	109.394	18.527	-10.153	137.9	-19.78	113.009
132.533	70.026	8.329	26.86	-1.652	76.921		82.24	-15.53	41.621	-127.307		38.05	-25.352			-5.198	82.393	21.224	-76.601	132.271	69.075	125.629
132.667	-40.938	-14.656	-6.892	-20.588	201.08		208.44	11.537	8.706	-96.415		-4.943	3.249			2.446	-22.254	130.244	100.137	157.613	31.047	105.131
132.8	160.16	-18.499	-82.574	-29.799	173.407		121.692	9.502	28.759	-115.272		39.445	11.701			4.429	4.501	-128.755	17.859	174.075	132.206	153.252
132.933	193.072	18.002	21.72	-81.779	173.762		10.584	41.014	29.595	-132.331		-21.74	-9.881			-9.208	-73.803	-53.445	-15.587	167.384	55.39	167.109
133.067	121.574	5.689	98.31	-110.509	140.467		89.234	81.74	36.08	-61.521		37.754	-10.964			2.351	-76.647	-115.278	3.542	129.779	36.843	108.246
133.2	221.268	27.028	22.201	-71.869	280.209		141.95	80.692	-15.809	-5.328		-17.099	-11.97			6.659	-222.879	-69.884	13.947	196.528	61.944	184.106
133.333	116.183	19.832	130.713	-115.12	190.236		91.021	29.142	30.604	-79.202		-28.064	4.426			-21.035	-248.381	-52.797	18.914	195.741	58.907	158.903
133.467	122.091	20.973	-79.723	-106.397	143.909		77.487	37.97	27.572	-153.024		-36.714	-130.511			-11.392	-196.698	-127.842	-104.462	127.209	125.951	138.141
133.6	165.758	21.264	73	-61.545	142.629		86.609	60.543	46.262	-75.138		23.992	125.645			3.009	-294.739	-127.143	79.623	177.129	8.085	130.017
133.733	117.583	-7.626	-7.238	-38.348	83.045		38.415	36.835	59.868	-74.395		-25.849	17.366			51.863	-267.689	-126.785	-71.601	79.89	122.585	79.371
133.867	66.897	17.781	-23.684	-19.552	152.642		2.72	46.147	12.863	-55.555		18.063	3.636			6.965	-304.138	-126.968	71.731	62.091	-8.626	120.013
134	58.465	47.021	1.074	-4.668	109.468		63.74	27.261	5.572	-50.433		15.399	-6.53			64.483	-260.964	-129.33	0.943	51.277	-122.827	132.15
134.133	138.251	-39.598	-1.837	14.279	182.3		185.492	25.017	51.449	14.486		-129.284	28.096			-7.88	-198.579	-254.598	-69.614	7.313	-131.3	151.918
134.267	138.235	-12.192	-14.581	14.707	91.519		81.612	28.582	82.604	-9.688		-11.521	-16.885			47.662	-208.745	-84.348	69.535	92.667	-318.49	113.909
134.4	48.832	5.044	1.274	10.371	138.785		-64.298	-18.52	113.157	-45.659		60.618	-8.608			2.293	-147.477	-61.438	28.912	112.274	-80.877	131.097
134.533	39.997	8.722	0.745	12.127	167.297		93.78	14.758	105.051	-27.22		6.257	4.332			140.553	-150.373	-7.074	-23.037	155.26	-44.849	97.787
134.667	33.726	-15.031	11.362	58.432	175.526		70.197	15.449	60.31	83.149		35.989	29.486			-116.458	-24.057	-25.55	2.968	106.043	-74.079	75.384
134.8	-14.661	16.302	7.999	16.219	153.783		80.4	1.868	50.391	-16.119		66.381	-62.564			20.394	-6.708	33.904	-9.083	139.59	-73.827	108.321
134.933	-22.446	-2.069	19.127	24.72	156.341		52.694	7.035	-75.385	-88.398		25.491	-119.833			26.987	72.798	95.543	-1.293	86.11	-191.333	40.277
135.067	-12.086	37.906	-21.828	29.6	169.406		70.415	25.755	151.973	-78.35		18.773	-12.573			6.195	34.718	11.636	2.543	100.163	-77.752	35.163
135.2	25.852	-10.043	4.914	23.084	201.76		60.204	4.611	2.607	-29.142		18.828	28.562			-7.593	23.372	-47.542	9.057	37.841	-54.829	90.971
135.333	-11.27	-10.268	8.821	-5.235	193.018		-55.372	7.104	26.217	-34.841		25.801	22.082			4.209	-9.921	1.905	-15.609	27.121	-147.782	30.783
135.467	16.824	-22.958	2.948	-6.517	169.503		113.392	14.79	-17.203	-163.338		-3.867	138.281			96.248	31.478	16.712	-4.918	39.759	-47.127	37.466
135.6	39.976	-0.669	5.017	15.665	193.069		45.736	-4.792	19.037	68.19		109.905	24.685			-68.356	62.876	85.403	4.639	42.447	-13.783	-26.095
135.733	-12.695	-10.001	-13.138	35.147	140.518		50.585	-14.662	14.453	-12.58		28.821	-1.496			3.784	18.257	32.277	-10.265	18.146	-28.341	59.248
135.867	135.033	32.174	9.489	42.718	197.838		41.87	-55.069	5.816	6.747		-110.606	-2.359			173.876	-30.111	95.473	8.282	7.267	-5.96	-6.09
136	97.298	22.704	-22.265	36.77	196.613		63.801	-7.271	-5.098	-29.367		145.726	-9.839			68.062	-86.164	96.621	-9.794	77.657	-26.375	14.994
136.133	47.871	20.442	18.032	23.184	149.685		62.212	47.566	-8.888	3.05		17.239	25.639			22.182	-258.664	177.828	15.264	174.225	24.166	31.523
136.267	46.982	-15.083	-9.066	-16.875	135.997		66.431	51.861	25.878	-7.714		62.978	19.254			18.166	-321.294	49.306	39.979	27.606	120.74	-6.157
136.4	76.007	-12.879	27.664	-8.525	72.705		42.533	89.671	68.939	-4.096		24.619	-23.956			7.088	-236.2	83.522	-29.248	54.873	36.036	-3.874
136.533	1.848	20.049	-12.381	18.473	97.536		12.101	89.168	77.495	19.246		32.259	4.335			-1.61	-337.894	107.499	17.553	21.716	76.812	0.889
136.667	-0.467	-8.195	-46.436	-21.27	102.643		15.185	40.184	24.665	37.263		83.089	-22.961			15.307	-389.286	132.554	-86.651	33.002	60.732	-20.47
136.8	-62.798	-6.019	-84.979	155.079	6.599		38.385	99.124	-2.857	9.268		31.101	12.345			10.017	-309.318	55.066	-85.195	35.409	87.384	26.681
136.933	-9.851	-11.171	-51.501	10.196	131.973		1.554	72.809	-0.364	16.089		62.2	8.326			3.881	-174.904	92.76	-177.539	85.973	29.377	-15.428
137.067	-54.723	12.209	-51.758	38.369	158.671		6.669	59.283	-23.486	35.49		28.931	13.087			1.009	-74.647	88.82	-105.418	63.072	61.496	2.73
137.2	-170.932	3.499	-79.745	39.641	88.589		29.312	74.543	-12.024	59.798		63.143	-29.618			10.819	-141.04	32.144	-72.763	83.612	45.132	-12.684
137.333	-235.354	7.75	-256.114	-2.65	125.203		-5.894	68.141	36.747	59.401		-16.154	7.512			1.87	-176.45	103.645	-86.848	77.393	65.693	26.719
137.467	-206.601	-8.657	182.908	29.967	170.319		23.828	63.159	-100.321	44.904		25.998	16.608			-16.606	-158.842	265.051	-21.525	40.699	27.325	-8.017
137.6	-236.506	7.226	-36.999	-21.954	212.552		8.85	52.931	-12.392	45.234		64.973	-1.548			26.72	-190.112	-56.02	-54.103	84.145	16.824	61.219
137.733	-219.424	15.031	-152.588	16.721	134.712		0.524	81.895	30.334	70.301		12.021	13.429			12.663	-130.326	118.383	-52.474	62.306	32.086	34.535
137.867	-370.23	15.035	-20.198	-5.096	157.023		7.849	105.63	88.132	83.467		74.754	-15.074			23.577	-141.008	100.985	-13.938	-28.883	16.912	23.256
138	-279.669	-13.309	-50.063	11.065	237.323		-1.064	126.109	8.868	16.199		43.784	-4.71			15.211	-52.133	152.563	-11.188	116.324	37.386	58.437
138.133	-257.914	17.539	-18.568	18.049	55.474		3.542	102.071	-16.726	35.746		89.346	22.253			-13.243	-56.743	264.974	-27.862	91.835	8.52	6.151
138.267	-277.174	10.079	-35.857	7.447	242.638		-3.986	51.224	-28.918	-52.952		27.948	-13.082			-75.078	-80.556	266.033	34.828	192.749	13.86	124.644
138.4	-198.329	27.564	-27.389	-4.497	62.574		-76.261	73.725	10.558	8.993		38.31	5.654			129.2	-74.819	-132.727	-4.024	-76.755	26.044	126.748
138.533	-284.311	-12.742	-19.826	36.851	112.31		85.78	65.049	0.478	29.111		28.64	-12.969			12.63	-131.483	134.149	2.515	32.938	-13.223	-127.123
138.667	-282.837	20.333	-127.635	12.391	122.271		-17.111	89.796	-17.586	3.928		67.949	16.163			21.615	-147.807	-132.224	13.429	-20.511	-13.205	253.52
138.8	-275.478	-8.387	143.606	17.528	185.811		12.869	-22.422	1.726	11.236		24.69	-10.303			35.817	-48.8	15.682	-45.009	38.376	26.77	124.223
138.933	-223.987	-7.764	14.532	-6.83	265.651		-5.097	-8.673	8.877	4.939		56.993	-35.946			62.639	-165.191	134.12	-37.683	38.971	7.475	-1.275
139.067	-274.937	18.968	4.164	-12.373	54.399		-9.743	53.414	4.013	-7.175		-101.553	38.168			12.212	-34.946	3.442	-11.79	105.073	-9.807	-9.98
139.2	-190.15	9.796	-31.035	-4.846	131.425		-27.455	18.211	10.171	16.422		44.143	-15.525			21.893	51.585	132.945	-36.498	111.517	37.32	126.628
139.333	-159.921	27.921	81.701	-18.979	271.325		-7.125	58.548	-7.987	11.181		139.704	-42.783			-15.8	93.82	6.241	-27.313	191.728	32.495	-4.121
139.467	-34.972	16.456	7.359	-22.936	152.521		-4.49	50.826	-81.721	26.934		-25.072	-38.81			19.093	127.37	264.406	-41.296	-63.793	4.392	0.464
139.6	-5.208	16.919	-50.405	12.811	166.54		-9.983	57.602	95.982	60.597		-6.65	38.151			22.294	179.494	11.42	-20.42	39.418	-13.967	124.605
139.733	88.595	60.221	-37.182	24.422	149.284		-15.076	76.623	11.003	68.717		42.351	14.114			-6.811	185.055	132.837	-8.317	33.156	-50.913	-18.225
139.867	82.882	48.077	-27.193	4.253	126.291		-20.052	63.034	-114.51	49.557		42.335	14.697			12.961	128.564	-6.652	61.11	5.515	3.297	-12.021
140	146.429	75.965	-14.152	-39.663	120.202		-14.682	42.881	99.529	11.954		148.047	19.664			17.103	148.976	11.508	36.108	23.07	119.434	16.546
140.133	136.148	9.231	-6.332	-19.473	89.339		-29.125	5.876	-105.848	34.628		-125.769	30.288			6.141	22.501	265.58	8.034	74.442	-100.089	127.365
140.267	71.509	71.542	2.582	-21.533	103.964		-127.968	6.555	92.404	-13.528		60.055	19.999			-9.306	103.136	9.88	12.501	70.93	-12.267	127.693
140.4	99.547	47.837	28.001	115.227	140.18		87.561	29.889	-3.735	57.98		13.139	12.987			19.433	169.558	267.997	43.521	110.221	-22.986	125.77
140.533	113.399	70.084	-96.596	25.566	112.158		-12.907	12.435	57.932	10.65		104.706	38.147			-35.529	83.808	136.664	14.527	171.164	18.943	-21.627
140.667	129.312	51.84	-1.486	39.296	151.994		-99.469	-6.206	44.806	15.998		-106.922	-1.263			17.492	112.694	-134.518	27.271	-18.986	15.336	-10.164
140.8	-77.709	51.157	37.168	14.99	151.174		-123.653	-12.41	58.199	36.169		-21.87	17.21			5.555	110.195	268.286	141.799	94.572	-14.845	123.845
140.933	-305.086	64.972	21.597	6.414	163.456		-147.11	-16.624	3.899	20.079		35.869	3.315			15.771	80.171	-13.992	72.653	50.072	-73.979	-123.743
141.067	-337.106	108.194	69.963	11.998	177.593		-183.464	9.398	-2.176	-2.252		143.749	-14.959			5.952	43.991	133.089	93.013	81.407	-22.292	124.18
141.2	-197.676	65.971	64.761	14.257	199.485		-196.471	7.447	20.035	-0.917		-149.453	-8.771			24.539	109.557	-135.683	85.79	23.305	-33.57	-16.38
141.333	-69.127	64.832	14.786	6.603	-21.955		-203.457	11.349	10.414	-12.979		-27.531	11.284			-12.635	79.636	136.148	29.055	40.481	41.733	5.238
141.467	-26.17	47.093	64.756	-24.782	181.949		-142.979	-17.681	35.851	11.274		22.503	19.561			16.393	100.669	134.432	17.262	81.956	-46.213	123.631
141.6	32.655	47.865	44.58	18.854	102.412		-123.53	7.625	16.812	23.461		135.433	-14.189			-101.875	66.685	-10.716	43.029	93.202	-90.668	0.389
141.733	-30.397	88.81	63.31	8.556	97.462		-156.491	7.209	16.498	10.632		43.12	19.448			13.824	20.994	134.855	13.845	36.092	-152.324	1.737
141.867	11.36	81.477	42.703	10.08	38.238		34.142	22.278	14.594	10.135		54.8	-28.185			10.621	58.904	22.736	-14.83	136.04	-139.026	124.788
142	-4.339	89.176	29.982	-8.027	134.174		-63.098	73.781	1.523	22.594		6.348	4.506			136.097	-83.708	-24.909	9.809	70.326	-64.132	1.289
142.133	-20.449	81.165	21.612	42.747	-100.037		-44.668	31.209	100.221	-6.221		29.443	17.481			8.674	68.825	-21.588	25.475	74.817	-114.514	1.496
142.267	101.762	94.809	11.501	24.779	140.406		-72.658	8.055	24.991	-3.699		25.587	-27.43			-11.401	-96.933	133.432	15.444	58.884	-98.778	-9.109
142.4	57.98	100.748	9.373	15.576	-5.512		-126.988	26.339	22.112	7.491		-8.195	18.893			-16.314	105.029	-23.121	28.61	79.411	-113.488	18.83
142.533	-174.57	73.895	18.654	29.406	-97.989		-119.86	1.75	2.42	-31.889		-12.925	-36.576			-54.26	111.566	133.194	3.526	23.562	-102.197	123.752
142.667	-47.911	82.489	-16.993	9.755	-11.079		-70.273	-3.334	1.423	9.166		147.619	-24.346			-43.376	66.595	4.985	-5.565	67.625	4.089	4.813
142.8	-33.216	48.751	36.452	22.206	89.097		-70.262	16.298	7.6	26.145		-149.778	-31.78			-83.795	58.156	133.45	-7.587	72.322	-224.361	36.811
142.933	34.085	29.786	7.837	2.512	-45.037		-86.503	-8.828	-87.229	3.936		-5.636	28.092			-45.391	8.754	134.083	17.305	56.307	-55.808	-21.832
143.067	34.691	40.016	30.977	67.237	-35.257		-72.147	-18.267	9.01	34.741		34.624	-43.77			-84.999	25.564	132.838	25.439	163.506	-131.121	14.906
143.2	74.085	8.837	28.692	95.544	-32.754		-49.462	-7.198	32.154	20.953		6.526	-55.077			-130.172	161.242	0.205	-11.194	84.011	-8.658	2.487
143.333	151.316	47.999	17.362	68.399	-91.374		-12.252	8.141	8.802	19.536		-29.578	-80.374			-102.234	-40.353	-9.486	24.501	72.057	-64.978	-18.913
143.467	128.873	15.768	-16.829	53.594	-17.812		-31.311	3.531	55.416	24.825		27.89	-100.52			-166.789	84.226	133.484	18.404	111.692	-48.275	-10.429
143.6	184.604	2.198	-2.581	-10.064	-150.113		29.141	-10.617	35.602	3.914		-4.504	-86.226			-42.441	-24.358	1.16	16.036	54.452	-92.254	123.738
143.733	161.509	-16.643	142.898	1.761	38.559		-10.46	2.153	-14.858	-13.996		11.861	-93.363			-29.145	46.013	-3.393	34.018	135.842	-40.485	4.082
143.867	195.745	11.541	-85.115	11.509	5.38		33.39	5.501	26.61	4.441		2.92	-54.514			-30.063	120.851	133.094	56.207	62.801	-49.49	-5.363
144	83.46	8.027	-129.478	12.562	-240.983		23.623	-37.101	25.527	22.091		146.294	-70.292			-5.14	8.82	132.914	36.787	110.859	0.588	-0.775
144.133	123.775	1.482	130.963	19.44	228.302		48.417	17.493	16.898	8.131		-123.093	-75.827			-59.635	63.09	132.768	13.352	84.368	-49.978	-123.634
144.267	155.35	1.501	-2.386	13.064	-27.007		15.508	8.854	22.646	17.134		-8.71	-120.182			-11.175	40	133.283	102.324	73.831	-21.744	-123.626
144.4	118.366	-7.617	55.678	-9.748	-48.442		103.738	47.781	24.946	44.194		-1.186	-75.806			-52.527	-22.276	-5.344	72.342	123.227	-61.588	123.65
144.533	124.25	-2.983	57.374	21.029	-128.46		154.64	96.035	37.894	6.225		-4.114	-78.72			-32.213	123.485	-5.155	29.759	101.904	64.787	-123.705
144.667	105.347	5.23	60.725	27.643	-29.534		165.203	55.813	16.779	15.104		4.225	-57.803			-15.998	-30.003	132.835	56.611	82.471	-49.452	4.666
144.8	134.486	-3.959	32.887	3.47	-43.472		139.535	41.113	-20.379	-35.51		-2.812	-75.481			10.844	158.031	-3.723	24.529	106.619	-76.721	124.736
144.933	122.76	-11.248	25.768	15.586	-31.707		44.519	15.723	19.161	34.396		13.576	-36.473			28.785	31.039		16.424	125.193	22.284	-123.588
145.067	49.631	5.889	14.16	5.932	-98.546		69.138	-17.036	8.954	16.668		13.063	-51.52			99.209	-45.772		33.815	96.252	-33.367	-578.155
145.2	69.101	-1.838	-10.052	11.348	-169.486		48.931	-8.094	7.582	11.085		5.868	9.029			20.46	64.205		38.717	126.672	-55.935	-4.051
145.333	18.113	-7.926	-12.164	87.505	-470.121		-44.484	51.932	-2.901	63.984		-24.51	0.59			104.062	78.511		-8.287	121.701	-31.431	125.129
145.467	3.332	-28.015	48.559	29.832	-133.547		99.299	10.24	-27.169	39.4		-33.394	26.691			43.912	30.448		72.468	61.658	11.455	-124.585
145.6	69.008	-4.333	48.787	66.699	-102.457		45.88	32.787	63.415	20.135		-18.631	-18.822			20.926	29.151		15.479	91.215	-51.87	-4.062
145.733	41.054	-9.824	46.854	83.871	-69.452		26.239	2.486	16.173	42.18		-19.042	-11.097			6.733	-27.161		3.317	101.327	46.074	124.739
145.867	105.612	-29.554	98.411	58.998	37.689		75.583	32.991	26.738	19.159		-5.591	-16.965			-7.534	45.031		17.541	15.018	222.97	-124.647
146	91.321	-5.899	60.688	52.937	9.035		33.933	-29.926	0.989	27.076		-5.706	-43.36			6.853	-20.84		-2.803	100.371	26.187	0.034
146.133	111.46	-5.381	29.696	5.98	131.467		-10.576	29.427	-9.374	18.394		-18.758	-74.844			19.788	22.531		13.515	98.237	50.973	0.684
146.267	124.09	-31.516	-3.299	9.053	125.795		-77.567	19.683	-12.798	-4.321		144.152	-101.76			6.963	28.505		16.368	195.119	83.105	3.516
146.4	9.292	-13.339	5.587	-6.047	132.979		88.974	31.679	-25.767	37.107		-3.934	-49.129			-79.85	18.214		-11.775	103.668	25.931	9.989
146.533	80.591	-16.457	-8.96	-0.6	174.655		-73.572	27.047	-8.613	40.137		-33.645	-51.759			6.712	-38.292		0.558	-32.831	62.298	3.579
146.667	51.372	-49.643	-26.106	-9.603	1.451		124.354	-32.135	29.579	-36.046		-48.233	-39.924			72.514	15.701		-9.722	155.39	70.308	248.85
146.8	98.188	-4.335	68.431	19.414	269.605		47.344	17.646	-15.699	118.296		65.535	-8.465			22.463	20.252		4.775	93.349	62.966	-124.701
146.933	99.625	27.216	-10.69	19.704	108.352		38.072	43.124	20.653	13.837		-149.098	-36.223			-21.274	21.544		16.809	140.696	91.111	8.83
147.067	49.091	-7.362	26.779	-23.526	136.489		56.171	80.042	29.307	37.94		3.799	-27.978			-23.406	-32.924		-13.282	25.706	83.365	5.579
147.2	65.969	-15.774	64.249	14.958	82.523		-58.174	97.951	19.967	21.954		-58.599	-33.875			-65.069	-41.435		-6.077	109.977	71.399	2.493
147.333	94.641	-38.604	93.782	-64.442	79.277		97.554	56.605	-3.975	28.598		-110.493	-28.765			-58.344	-8.789		-15.763	82.64	89.406	1.77
147.467	63.765	25.392	33.432	-92.328	59.897		67.09	34.104	4.547	17.387		-66.773	-37.948			-95.635	-18.06		4.909	183.4	77.02	4.247
147.6	-17.672	-5.388	25.06	-111.468	18.497		21.116	28.893	-47.584	26.218		-64.802	2.117			28.45	-38.532		-20.779	-34.596	39.965	1.288
147.733	31.067	-8.444	-13.564	-122.657	15.575		18.544	24.308	51.096	6.873		49.671	29.438			-163.942	39.674		-1.908	115.022	47.503	-125.441
147.867	27.029	-30.56	27.502	-111.006	-9.658		4.235	-23.668	23.276	-22.93		-14.977	30.438			-59.06	36.812		-13.624	111.6	11.402	-7.917
148	58.448	-22.242	24.4	-138.701	-125.577		11.026	52.128	36.721	14.37		-31.967	66.134			-102.056	-92.19		-55.428	87.898	3.909	124.881
148.133	72.344	-43.973	-42.753	-97.807	120.54		3.82	-10.271	6.651	6.725		-56.793	7.123			-42.852	265.6		12.818	58.417	8.887	2.844
148.267	71.727	-58.669	24.736	-49.033	30.064		0.425	12.968	9.735	7.233		-88.275	-17.078			-43.069	37.546		24.362	62.32	6.592	8.641
148.4	99.045	13.545	-4.954	-60.315	136.815		-63.303	38.892	13.663	-9.772		-48.269	27.41			-16.257	256.458		-32.28	92.939	28.499	-15.616
148.533	58.756	45.922	6.063	-62.729	-3.708		48.345	30.676	-18.37	42.692		-93.983	74.081			-17.591	79.408		-34.136	58.81	80.229	17.139
148.667	70.442	26.113	-11.839	-89.142	-26.5		-28.799	-7.793	-6.392	8.083		-91.732	115.115			12.872	39.802		-37.18	38.415	60.661	-9.308
148.8	98.076	42.932	11.253	-81.02	-30.027		-57.277	5.43	-7.635	-0.135		-78.112	9.418			3.205	96.673		-50.969	35.321	42.556	-8.079
148.933	109.567	2.048	9.017	-78.976	-34.853		-113.763	4.22	134.269	12.396		-117.097	-7.775			9.879	111.141		-66.903	35.502	91.491	-8.039
149.067	117.946	-85.479	2.798	-27.912	285.186		-239.1	-4.553	-27.237	-3.778		-122.659	24.743			7.544	128.392		-40.696	45.651	92.214	-10.794
149.2	93.012	-54.451	4.4	-11.725	171.138		-56.691	11.437	-37.055	-12.462		-150.235	36.926			28.81	75.166		-10.091	11.872	146.646	-3.431
149.333	58.919	7.303	16.307	22.837	238.266		-115.66	21.039	-4.99	-17.946		-103.445	3.571			-7.535	39.777		-9.558	92.008	109.585	-8.548
149.467	75.643	-30.817	-29.503	-8.472	89.399		-217.767	42.267	-27.313	-8.07		-11.328	-64.95			6.244	45.864		-24.908	54.464	39.21	-2.02
149.6	72.999	-5.298	-27.763	5.94	271.611		-87.938	-7.438	-8.757	14.095		-132.065	12.785			-17.883	8.455		-62.413	64.864	-14.192	3.373
149.733	108.629	127.919	-46.461	-21.379	81.664		-139.674	-8.068	-20.258	-7.119		106.567	39.677			14.137	150.03		-142.515	-29.774	29.608	-125.201
149.867	83.967	31.463	22.427	-80.451	165.969		-123.719	31.621	-105.114	7.453		2.983	17.573			10.428	17.3		-158.983	-14.637	14.078	-10.558
150	67.882	-75.871	98.253	21.133	149.207		-134.836	-16.667	37.972	3.155		30.242	17.117			17.29	45.709		-188.537	1.634	-20.548	-6.548
150.133	36.076	21.347	64.89	11.499	96.422		-112.971	-29.33	32.218	-76.059		-58.589	123.324			-5.68	64.46		-111.69	9.808	44.346	-2.671
150.267	40.021	4.197	17.271	-23.939	162.354		-51.278	4.143	46.146	31.859		73.206	15.656			12.25	93.331		-97.974	116.825	27.596	-6.164
150.4	21.799	-4.976	41.124	50.439	79.153		-50.473	1.74	23.876	42.725		79.295	-3.539			6.828	-46.652		-91.87	36.925	14.223	6.762
150.533	11.6	16.697	9.408	-2.785	76.452		-24.102	38.213	19.615	39.718		48.955	-14.141			-7.516	117.684		-83.398	94.197	11.5	-2.984
150.667	-41.915	26.401	-129.096	25.253	1.844		26.715	7.902	27.866	41.423		91.919	8.507			-45.595	64.992		-3.523	7.399	51.832	8.994
150.8	11.502	-8.436	102.454	-15.456	175.634		2.165	-8.518	31.988	90.847		18.761	29.378			13.358	22.583		-21.52	132.42	-29.036	-124.655
150.933	-6.601	34.633	-22.74	20.949	106.417		13.085	-4.861	43.972	68.07		30.655	22.202			-7.46	26.59		29.134	-36.987	-5.552	-125.186
151.067	33.867	7.008	-50.077	4.281	116.197		26.252	72.954	15.135	53.403		166.664	13.467			26.025	-35.243		-44.834	46.063	-17.818	124.587
151.2	-38.161	26.97	-92.045	13.964	106.439		11.269	65.659	23.889	-2.893		-64.461	-20.135			38.608	-60.05		-15.664	30.119	-10.525	-6.369
151.333	-1.558	-18.608	-91.107	-18.526	90.14		59.488	37.38	14.679	3.184		74.078	-8.2			3.593	122.118		-24.977	216.902	120.555	-1.965
151.467	113.501	52.166	-108.245	-3.136	72.661		82.862	41.936	8.128	8.157		133.533	-2.131			-17.859	42.999		3.936	73.912	-5.508	-4.639
151.6	84.377	9.335	-85.497	53.262	50.872		71.177	35.949	2.892	101.145		118.402	15.005			11.716	-47.104		82.591	102.031	20.181	-8.944
151.733	101.814	-10.643	-89.813	-2.951	84.669		54.158	5.096	-2.827	-18.977		101.375	32.889			15.709	139.307		7.109	138.684	16.693	-1.97
151.867	105.566	9.908	-46.782	50.561	114.594		68.171	59.846	13.511	1.985		39.774	8.488			14.695	230.566		-19.07	98.217	-122.605	-6.667
152	54.289	0.962	-133.559	7.397	121.468		98.546	6.431	11.184	15.94		31.092	-8.725			62.823	89.937		62.229	-122.566	-362.296	2.99
152.133	58.436	27.623	109.645	47.162	171.429		70.578	21.377	-4.05	-13.912		76.603	10.26			16.783	-110.424		84.858	305.941	-607.871	-0.918
152.267	62.163	15.68	-15.155	38.964	83.205		66.749	7.718	15.515	-28.05		197.772	19.86			3.342	148.414		83.771	110.153	-487.558	124.696
152.4	37.167	45.809	-15.506	23.847	99.959		100.772	45.848	-19.413	32.881		163.084	-4.788			30.847	69.298		76.11	36.88	-365.1	-3.704
152.533	99.258	19.64	-20.854	46.306	80.058		108.019	18.699	27.186	-107.814		68.503	-15.107			3.831	185.222		131.599	65.738	-122.731	-125.011
152.667	66.42	-10.663	12.452	7.777	101.168		47.643	9.441	-8.225	-9.596		87.914	13.536			34.764	155.88		47.718	82.726	-122.214	124.927
152.8	87.207	17.381	26.278	31.594	143.605		73.928	39.014	-19.78	32.642		64.899	-9.081			-8.595	169.552		25.15	59.939	-121.617	8.131
152.933	72.083	12.97	-42.001	10.365	95.456		68.272	21.625	-6.964	58.294		174.05	-54.276			116.193	-28.654		126.474	11.679	6.684	-11.253
153.067	93.905	-13.415	41.958	21.381	128.19		53.761	-3.772	3.705	42.553		80.241	65.324			-70.807	40.417		47.53	-3.546	-121.726	-125.221
153.2	52.733	28.574	-22.681	-15.512	106.863		50.522	4.262	-20.27	42.39		23.755	18.94			28.7	122.772		9.215	22.688	-121.767	124.707
153.333	72.166	-15.906	-8.449	46.185	15.447		-3.874	-15.5	-15.855	-7.931		32.761	16.024			159.383	57.654		60.517	19.699	-121.721	-125.107
153.467	100.502	18.977	7.423	-20.587	147.266		6.755	60.404	-22.762	36.65		19.695	-16.844			-59.256	8.955		24.907	69.39	-121.787	-124.519
153.6	118.683	4.773	11.922	-3.288	51.802		77.171	29.253	-24.793	45.697		32.623	21.235			8.758	-9.416		5.149	23.898	-5.586	124.566
153.733	91.433	-5.34	43.159	3.361	100.268		86.439	1.481	-6.568	54.522		45.873	8.677			21.424	3.903		20.172	-105.742	-0.35	0.485
153.867	73.675	-1.452	-34.026	29.184	79.542		89.348	-0.661	-66.706	44.838		155.111	-33.467			130.196	-179.244		26.829	128.899	-121.966	124.656
154	80.371	6.397	-18.276	39.536	76.863		80.705	-26.77	-49.156	46.476		126.079	-71.39			9.751	-373.846		39.171	-3.579	-122.244	-124.865
154.133	24.663	-12.468	-34.545	67.832	80.315		82.137	3.029	-23.859	49.231		117.885	-83.641			-24.305	-473.573		38.053	-3.512	-842.807	-1.017
154.267	116.548	15.621	-2.007	23.534	9.758		16.294	17.183	-41.753	48.979		109.152	-108.31			-84.545	-308.262		-10.68	-21.007	-230.623	124.477
154.4	70.592	-18.351	34.298	64.896	-43.885		25.265	38.867	-78.67	29.476		84.032	-127.927			116.681	-295.265		5.1	-18.303	-168.032	-1.951
154.533	57.525	12.674	-7.06	33.925	70.239		59.063	87.128	-88.783	9.269		101.608	-63.207			40.232	-248.258		-3.708	-27.18	-106.416	-2.937
154.667	83.28	42.028	-3.461	19.678	-9.242		46.537	25.428	-123.623	4.088		243.698	-35.577			66.348	-256.101		20.823	18.756	-62.875	-4.17
154.8	78.223	7.703	63.845	29.448	128.597		50.478	21.019	-84.255	17.254		44.296	-75.044			21.117	-83.768		-99.274	17.118	57.679	-125.741
154.933	149.893	-4.984	-4.641	-7.61	-28.326		37.283	39.673	-118.61	109.876		89.117	-52.016			21.351	-147.719		82.796	13.54	-303.802	124.615
155.067	99.405	17.036	38.141	41.698	41.83		32.256	53.164	-95.692	-14.486		80.357	-46.089			-18.613	-34.898		-6.041	-19.428	-288.513	-2.552
155.2	66.464	8.747	6.205	6.356	18.734		74	12.032	-104.373	-29.693		97.618	-44.785			41.472	-48.711		5.439	-193.438	-229.053	-2.686
155.333	55.863	-17.828	-2.626	0.162	-16.824		94.456	37.296	-111.053	4.444		70.378	-37.007			-8.853	40.478		23.613	-234.658	-164.141	-1.436
155.467	106.754	-13.036	5.337	15.79	17.042		73.924	17.264	-100.091	-9.24		58.88	-75.27			21.725	143.187		-10.722	-39.784	-154.569	-124.879
155.6	47.327	-23.827	9.659	15.19	-8.932		37.605	-15.128	-59.182	28.145		62.256	-73.532			38.003	46.388		5.406	-21.388	-123.133	124.495
155.733	59.669	5.814	6.63	38.013	0.88		88.696	-6.697	19.87	-4.442		42.1	-21.341			10.62	88.572		24.132	-57.473	-73.289	-0.703
155.867	139.622	37.801	11.094	75.682	2.553		30.172	10.201	-145.769	-97.981		44.293	-10.522			-10.85	125.894		52.685	30.035	-188.852	-1.381
156	80.457	20.825	-19.022	-4.327	-123.902		52	36.373	21.208	4.142		68.224	-47.296			7.622	-31.729		-5.954	89.373	-187.19	-124.817
156.133	89.419	15.726	18.846	71.392	112.511		304.293	36.525	-71.651	-20.61		36.84	-24.726			-89.695	214.184		-3.416	-17.707	-241.252	3.817
156.267	84.819	26.708	-3.236	10.614	-84.147		43.883	8.641	-117.8	26.225		47.293	-39.932			104.617	73.45		24.611	-7.799	-114.184	3.745
156.4	101.652	101.698	4.755	28.51	-12.681		37.377	30.493	-17.823	2.328		66.015	-11.222			-39.409	35.882		49.938	12.011	-35.56	1.743
156.533	134.564	78.675	0.304	23.559	93.061		2.538	-31.684	21.289	38.409		16.52	-30.444			4.575	47.27		13.798	12.12	-46.811	124.418
156.667	131.477	33.689	-2.523	43.114	-111.334		-5.759	6.606	2.587	99.187		22.945	-19.936			15.298	22.536		3.222	-8.274	31.727	-124.619
156.8	50.605	74.134	-1.325	8.763	78.767		7.505	-10.734	6.977	77.309		63.152	-61.506			-10.551	131.954		-99.039	12.852	2.931	-124.66
156.933	122.14	57.819	-0.205	29.364	-65.049		-18.545	-1.415	-31.873	40.308		35.164	-53.262			10.899	77.609		81.086	-1.179	12.813	-2.071
157.067	125.04	21.832	-1.272	12.891	-123.823		9.988	-7.009	-39.046	40.36		87.189	-53.935			-11.251	54.823		5.428	11.004	28.863	124.54
157.2	142.898	52.355	-5.058	22.581	87.299		7.14	8.9	-61.778	23.927		81.447	-35.862			49.051	64.719		49.491	18.986	3.896	-124.647
157.333	127.386	50.445	-1.252	14.28	-123.523		26.067	-24.514	-18.095	50.665		34.663	-49.079			51.508	-13.911		-11.64	-32.615	34.681	-0.554
157.467	139.176	-6.406	-21.447	-21.703	143.698		-3.482	3.583	45.842	87.497		57.992	-39.198			13.087	72.712		22.965	-41.43	-20.766	7.728
157.6	95.5	-5.884	-6.932	-2.586	-60.297		-1.057	-7.79	18.848	25.169		38.183	-55.17			-99.737	23.705		20.47	-43.119	-5.905	-124.669
157.733	65.478	2.324	-36.009	31.17	-25.073		-3.385	42.539	31.512	110.935		43.943	-60.087			5.595	-18.881		-33.78	-4.667	31.051	6.716
157.867	28.912	20.078	-10.638	-19.403	2.084		-12.355	3.314	50.199	9.156		30.629	-42.873			15.642	-7.613		6.011	-66.263	-18.112	1.758
158	96.918	-14.247	-73.304	-9.967	-3.983		5.573	-10.881	62.3	6.683		56.847	-25.585			-8.25	-23.104		41.762	-154.473	-0.851	0.982
158.133	88.389	16.885	-104.771	-28.959	-5.917		3.66	8.993	109.898	21.467		2.336	-21.111			43.11	-8.846		21.026	-117.068	33.954	3.403
158.267	93.707	-23.733	-64.444	3.126	-3.655		11.845	8.313	96.55	34.948		106.637	-9.427			-25.407	153.407		5.021	-80.49	22.54	4.11
158.4	92.764	44.28	-89.323	-7.953	6.245		-14.194	25.766	30.936	-114.847		-14.31	-66.188			6.592	102.368		-16.228	-117.45	6.651	-124.778
158.533	126.785	12.954	-57.12	85.918	-28.083		-5.251	4.233	12.909	-9.961		99.64	-34.644			21.699	108.699		-11.978	-107.343	9.756	125.334
158.667	118.768	13.48	23.504	23.149	-125.027		-29.27	17.565	-5.8	20.502		24.655	-42.543			-24.296	111.1		39.348	104.418	15.608	4.515
158.8	105.705	23.837	-103.85	14.432	131.358		-103.485	10.985	6.568	-5.632		193.571	-47.928			-41.891	97.738		-94.868	7.503	-3.56	-124.901
158.933	93.852	-2.917	103.32	18.933	-18.411		-423.186	-16.475	-92.899	-11.822		37.275	-34.27			-91.703	171.089		88.052	58.216	-4.815	125.26
159.067	26.45	-2.151	4.628	7.743	33.632		-177.145	-45.297	114.453	-9.36		84.423	-42.349			-98.841	-16.507		-96.247	70.432	4.931	-124.389
159.2	0.267	-35.829	39.85	39.647	10.998		-190.163	54.917	52.271	-11.658		50.09	-28.546			-113.839	4.25		130.993	68.236	-25.258	127.219
159.333	-40.405	3.447	-31.019	62.721	-9.189		-187.776	29.477	43.501	2.098		40.234	-20.053			-117.564	49.205		-5.527	89.469	-3.997	-125.558
159.467	-22.978	29.592	-108.924	23.203	36.483		-127.649	18.031	5.837	25.85		82.228	49.9			-47.271	-35.583		0.859	68.318	-32.072	4.204
159.6	-3.961	-1.427	58.328	28.081	59.413		-127.512	19.934	79.936	7.642		-78.328	90.457			-138.987	89.276		25.423	25.606	-16.869	-124.546
159.733	-11.907	-20.825	-25.814	56.609	94.934		-126.239	38.875	20.112	-7.385		193.298	17.189			-61.458	-11.531		-11.286	23.479	27.067	-125.044
159.867	-16.709	21.096	-25.271	-12.703	82.898		-88.639	42.402	-72.068	-7.029		38.896	41.299			-55.789	-7.505		47.037	42.606	50.35	1.058
160	-66.815	-16.697	-129.29	14.931	-3.288		-70.885	35.188	91.798	15.692		13.467	-7.697			-65.305	-34.021		29.398	58.957	219.829	125.631
160.133	-29.315	-7.972	88.904	6.527	113.212		-81.845	37.424	14.662	98.15		83.942	9.505			-63.776	42.537		41.514	-5.781	85.143	3.894
160.267	-15.156	-11.051	-14.169	5.903	56.719		-13.487	23.251	4.912	40.478		93.333	65.823			-60.47	49.169		-6.25	64.802	59.92	124.828
160.4	17.28	-1.748	103.232	3.793	29.805		-9.287	28.941	-100.094	-8.231		-98.24	51.77			5.624	41.116		87.163	80.478	21.473	-3.675
160.533	-8.699	-4.585	28.677	10.633	5.507		31.249	10.814	-19.216	-97.338		59.572	66.002			-41.47	81.768		5.336	75.455	37.98	-6.707
160.667	-7.418	6.519	18.247	4.49	27.408		-24.594	34.019	-55.812	3.082		44.506	83.098			-20.246	37.542		29.754	96.372	70.305	-6.152
160.8	-24.421	-5.561	17.816	8.732	180.248		27.229	53.5	-118.967	-14.074		196.453	31.846			-9.325	108.728		44.082	120.345	100.234	-124.671
160.933	26.456	-5.617	53.812	0.413	80.774		-2.723	37.587	-64.954	-5.592		-135.343	34.085			-78.863	54.323		62.618	156.455	73.408	-1.921
161.067	103.451	-0.436	-38.906	-2.687	117.635		-3.63	43.5	-120.574	9.921		161.764	-5.19			-56.177	67.642		4.55	200.798	-11.975	15.199
161.2	47.684	-10.874	109.732	-16.812	26.122		-26.013	81.01	-116.937	92.43		-4.224	58.714			-24.51	90.106		9.71	122.115	43.276	-124.877
161.333	64.399	13.116	-254.261	8.506	125.703		-10.852	58.091	-164.493	48.721		27.443	-21.103			-58.09	101.733		26.998	114.857	-6.491	-19.761
161.467	89.876	3.916	234.189	-12.974	148.563		6.205	6.349	-168.751	67.372		9.027	20.736			-15.73	84.348		-24.352	-38.513	12.383	125.156
161.6	23.344	-11.451	40.293	1.563	87.042		-21.024	42.565	-122.443	26.139		-11.799	34.054			-19.699	118.48		-12.572	132.02	13.438	-124.718
161.733	65.843	9.936	102.755	-11.846	138.186		32.792	82.832	-144.155	17.334		108.816	-10.853			-55.916	109.34		25.337	87.907	-7.055	125.668
161.867	34.651	-7.388	74.619	4.483	149.853		96.184	31.254	-74.902	17.508		91.37	29.455			-105.538	-49.864		21.231	65.112	-7.007	-124.815
162	2.65	-5.356	59.517	12.663	71.83		109.018	9.307	-95.85	-40.027		60.964	24.713			-25.577	131.982		-3.491	55.064	9.999	-14.569
162.133	66.112	-5.406	-39.529	9.096	107.176		140.958	-3.497	-254.363	1.98		-92.283	-34.524			-89.55	122.107		8.05	52.834	-6.083	-25.029
162.267	109.517	4.734	147.603	-9.712	60.194		94.13	52.324	-69.138	82.154		66.572	-18.193			-96.781	198.587		-9.985	147.73	-103.203	-8.474
162.4	58.295	7.932	-110.11	-12.105	106.631		104.67	43.612	-53.518	-33.933		77.91	24.655			-29.611	37.58		2.639	-25.937	-76.226	-37.609
162.533	88.52	-4.569	37.466	-7.096	68.081		110.089	11.53	12.154	21.084		126.09	23.908			-13.665	-49.495		23.531	220.572	-38.18	-17.572
162.667	58.274	-17.977	-22.026	3.004	131.409		40.458	64.593	-24.076	35.703		85.829	11.275			-11.146	18.375		-6.719	-29.365	-137.472	-4.966
162.8	67.252	-21.983	104.801	-2.921	205.216		21.323	25.358	2.98	-38.52		42.259	40.608			-10.749	11.12		22.132	20.31	-88.869	-3.811
162.933	73.779	-72.557	23.705	15.244	13.569		34.045	48.244	-18.33	-38.343		51.358	7.172			24.201	-281.799		-4.655	36.106	-211.123	-11.054
163.067	59.412	-55.874	-51.272	-3.429	108.467		39.572	54.934	-11.143	-147.791		166.647	44.333			-4.454	-305.532		11.907	35.886	-201.786	-4.394
163.2	27.707	-82.336	-32.627	-18.415	158.532		13.618	45.453	-20.496	-135.249		11.982	38.68			75.032	-189.289		21.579	92.737	-183.693	-9.232
163.333	9.361	-91.664	-6.59	-11.604	-16.622		38.007	-71.242	-13.893	-155.14		33.414	17.013			-99.514	-216.938		9.949	79.643	-132.664	-9.028
163.467	38.97	-75.37	-38.494	1.166	82.886		22.841	1.633	-37.072	-233.929		51.197	13.99			-15.382	-309.844		-24.083	85.132	-94.528	-125.225
163.6	-19.683	-84.944	-18.211	3.886	72.227		31.931	25.456	-79.557	-198.458		37.182	27.146			28.097	-222.35		-80.376	94	-126.646	-124.865
163.733	33.893	-49.492	130.638	0.776	78.388		121.461	95.028	-28.632	-158.439		20.001	60.123			98.295	-313.471		113.894	51.804	-133.047	125.432
163.867	29.733	-57.276	-4.767	7.515	53.349		61.489	-66.459	-48.708	-170.949		93.08	35.456			34.446	-240.726		14.361	54.452	-154.118	14.143
164	58.192	-46.35	-127.829	-12.24	2.005		61.044	4.375	-151.137	-125.229		-46.962	83.012			-96.239	-291.235		13.181	11.962	-132.023	-12.614
164.133	75.269	-61.642	196.95	12.852	92.884		23.929	5.733	-97.614	41.188		154.281	187.813			-20.087	-379.522		6.936	54.756	-146.34	-2.261
164.267	19.353	-31.294	15.216	-11.814	21.615		51.118	11.844	-31.939	-17.138		-44.255	5.649			118.255	-161.965		-4.053	49.108	-69.315	11.471
164.4	11.653	-78.858	41.328	15.526	-22.365		25.776	-5.194	28.715	-11.753		27.734	26.952			-21.629	-279.306		7.395	82.835	17.417	-5.546
164.533	44.216	-27.223	48.978	0.467	22.48		2.83	4.068	50.579	-56.89		22.548	9.778			-142.283	-297.858		-23.842	60.585	-81.347	-124.924
164.667	-24.226	-84.928	110.842	10.282	-8.224		34.23	19.201	21.297	43.854		33.509	33.736			61.716	-171.689		27.451	133.067	106.252	-124.956
164.8	3.196	8.721	19.334	-25.925	85.478		4.63	-3.224	58.716	-9.767		34.127	14.868			-65.055	-139.546		10.278	233.517	39.461	125.438
164.933	45.178	-71.534	22.685	3.591	9.764		4.657	-0.918	15.395	47.064		-17.248	27.144			40.569	-13.067		-12.479	-14.632	83.09	3.462
165.067	84.54	-26.529	-62.253	1.045	52.152		25.874	-15.884	98.171	24.275		38.986	49.393			43.077	111.921		-16.103	92.834	65.09	125.68
165.2	3.199	-15.233	156.678	-19.492	-42.689		48.021	-19.464	261.54	33.411		25.605	24.92			20.339	189.126		24.644	66.181	64.24	5.315
165.333	19.037	-18.541	-129.598	12.766	-7.362		-4.739	-5.614	77.886	24.89		27.331	17.256	18.445		140.016	176.963		12.399	75.744	69.744	-122.601
165.467	-8.848	-29.052	148.172	-6.34	121.277		-4.215	-0.472	31.369	-6.433		43	21.797	-16.064		-94.103	219.599		-35.358	65.866	67.955	6.57
165.6	65.007	-31.25	-4.218	-28.824	123.49		-27.143	31.348	64.767	0.816		-10.253	-6.066	136.374		37.004	268.066		17.06	11.093	120.261	127.996
165.733	69.843	12.241	-162.862	3.164	28.515		-4.662	-7.754	41.177	8.547		37.231	14.751	-921.156		91.264	264.268		19.674	94.682	66.41	-123.06
165.867	23.082	-12.343	-41.254	11.838	73.56		-95.347	11.136	82.491	19.326		-2.463	20.882	-812.716		40.19	192.089		-1.288	116.106	131.943	129.003
166	30.934	6.714	106.263	-8.319	-77.796		-150.412	-18.355	62.391	-15.711		-23.295	-28.885	-543.506		47.453	189.916		-6.69	117.76	102.812	6.669
166.133	93.089	3.431	-13.454	-5.633	5.933		-166.721	-10.452	72.627	5.006		16.933	13.36	-679.114		34.776	106.351		-4.811	111.531	108.189	22.128
166.267	88.205	-27.481	4.744	27.246	51.44		-195.416	-35.802	48.057	-24.584		116.15	4.029	-408.009		-14.899	122.333		9.693	108.182	72.564	133.191
166.4	56.453	-49.104	13.481	4.346	144.362		-193.65	-24.598	43.282	-18.539		-99.851	31.125	9.121		38.844	113.189		36.679	123.972	173.289	-121.913
166.533	107.19	9.582	-46.354	-16.045	3.593		-153.518	96.272	45.45	-70.919		30.852	-8.093	-272.502		40.411	87.984		-1.449	94.02	89.708	10.62
166.667	64.955	4.148	5.901	6.014	-123.505		-121.783	-94.846	32.386	-123.858		169.862	-5.825	137.731		38.711	173.843		18.876	128.986	17.087	-124.644
166.8	104.467	19.067	180.837	-13.171	136.283		-78.934	-19.526	21.263	-126.639		29.809	-27.545	-136.808		13.218	104.808		-126.363	31.778	-57.656	130.05
166.933	136.762	14.877	-22.82	4.726	14.961		-89.234	-27.827	24.736	-105.757		-110.203	32.346	-14.636		61.557	120.508		112.324	42.496	43.554	12.212
167.067	141.83	-14.137	9.517	-5.47	-13.455		-81.217	-63.151	7.914	-139.134		81.325	16.4	-6.665		-30.36	82.934		8.445	16.32	56.669	18.754
167.2	159.242	8.61	202.617	-6.684	-116.44		-107.245	-41.646	8.996	-32.066		17.833	-10.273	-0.509		44.963	182.725		3.3	18.05	85.814	131.224
167.333	157.997	-10.21	4.559	2.171	75.873		-112.578	-58.435	22.55	-28.28		59.723	12.778	-5.728		18.488	154.777		-4.586	75.493	117.873	-125.179
167.467	148.019	30.303	5.439	-2.384	-52.924		-80.581	99.945	61.959	-45.759		25.879	-10.539	137.236		12.403	20.939		12.51	97.796	74.793	128.407
167.6	122.03	-7.795	0.996	19.18	46.732		-70.258	-2.837	110.586	27.86		-6.123	-6.984	138.942		35.011	151.896		-129.84	69.21	-24.192	13.848
167.733	128.901	9.077	0.898	-14.326	168.958		-29.244	4.349	120.369	-4.945		33.203	2.903	-25.477		15.066	211.169		71.043	115.829	47.004	-124.073
167.867	194.678	-12.911	-21.271	18.203	51.392		-7.125	-102.275	62.093	-56.596		22.655	6.299	8.642		30.44	209.105		13.525	201.723	188.938	12.297
168	150.832	-18.003	-128.738	5.15	-5.506		63.003	-23.601	76.266	63.784		-15.052	-23.472	136.322		52.265	129.722		-29.625	123.801	590.355	-250.374
168.133	130.578	7.766	45.704	-12.536	149.16		93.251	-40.946	59.052	77.954		8.724	1.836	33.587		-6.983	173.006		-142.331	-34.161	71.565	126.696
168.267	146.251	33.795	-15.101	7.062	80.744		112.192	31.296	52.688	-1.653		11.251	9.008	38.681		65.812	210.719		36.865	80.587	57.952	3.986
168.4	132.441	-8.977	-18.814	-1.178	78.299		77.93	-21.268	107.345	-42.671		8.702	-20.985	-138.323		20.894	196.087		-201.559	82.126	145.813	8.053
168.533	130.54	-28.553	26.413	5.347	63.418		90.989	-19.763	147.745	-40.859		-4.542	20.897	-136.409		155.165	184.964		-93.388	53.443	78.991	130.293
168.667	137.536	-2.816	19.702	-15.048	34.743		60.614	7.824	139.985	-78.995		20.853	-17.132	139.106		-60.018	141.504		-82.384	75.217	119.581	-124.292
168.8	124.959	22.031	62.864	7.649	-14.488		80.66	19.746	99.947	-21.353		29.686	19.819	-5.921		53.086	120.385		-104.389	69.051	138.829	129.351
168.933	146.785	13.665	24.516	-16.066	5.401		89.58	-24.467	92.286	-64.496		54.361	-8.012	-24.852		49.332	104.169		25.142	29.099	122.804	-122.732
169.067	139.158	6.842	59.179	-0.596	15.552		56.888	-21.785	114.041	-71.938		49.676	-66.54	-3.786		26.006	81.746	22.518	-54.651	77.925	79.485	128.486
169.2	157.089	-13.43	8.994	7.624	101.422		113.173	-10.177	78.378	-43.528		6.737	-198.091	136.168		9.863	94.629	272.332	-127.116	90.75	71.982	-123.817
169.333	111.477	-108.742	-12.54	-5.984	-22.322		110.064	126.829	85.963	-50.153		29.136	-173.073	-135.787		27.669	74.872	-136.103	-88.727	100.521	86.097	128.962
169.467	101.176	-48.818	106.809	-1.953	219.831		140.959	-8.241	55.828	-35.271		38.083	-234.558	-12.047		144.498	97.314	136.169	-80.294	87.778	85.623	4.716
169.6	102.594	-35.972	-32.256	3.305	81.185		138.393	-23.284	8.469	-72.592		26.188	-175.107	7.644		-73.085	124.645	-20.882	-39.012	33.494	85.292	2.852
169.733	-23.59	-33.762	-21.275	-6.546	12.236		69.803	-12.823	-21.787	-44.951		60.797	-108.666	-0.801		166.466	80.883	136.47	-42.3	72.27	127.725	-131.612
169.867	103.137	12.203	-41.673	-6.948	-37.009		33.157	-6.347	24.352	-49.732		11.056	-138.251	1.146		29.421	34.719	136.787	-32.662	71.749	91.205	126.899
170	94.278	20.639	42.722	6.333	-12.457		48.464	-17.283	22.551	-23.664		34.445	-65.201	-3.99		53.039	30.612	4.029	-27.569	53.727	151.891	-7.7
170.133	133.112	-26.832	20.155	2.745	-56.626		121.493	-34.912	12.227	-25.707		74.448	-56.742	135.956		-64.624	168.242	6.671	-96.491	54.45	106.977	-8.736
170.267	131.458	-22.281	-3.38	13.422	92.76		85.113	-17.02	59.835	-39.302		66.774	-84.497	-135.966		142.023	-163.736	275.869	-113.953	26.22	86.049	126.147
170.4	77.925	-7.309	-27.745	-24.321	240.903		94.499	12.828	50.759	64.58		48.388	-88.207	135.934		36.918	256.285	63.483	-35.843	21.815	81.895	-109.523
170.533	131.664	21.788	-27.014	3.325	43.781		89.724	-2.539	179.803	62.232		32.941	-16.29	-135.796		40.732	79.935	50.141	-61.471	49.015	75.165	135.827
170.667	58.906	35.429	-124.485	1.16	242.763		138.438	-8.639	92.573	121.107		22.341	-33.239	0.252		31.125	99.746	19.388	-32.756	36.611	54.389	-21.986
170.8	116.08	-3.351	84.365	0.757	27.611		89.292	29.783	-30.755	19.442		60.39	-69.82	136.201		49.293	-21.968	37.899	-20.572	20.306	68.932	15.03
170.933	44.989	6.175	31.108	6.088	14.912		128.779	3.527	58.177	41.836		41.081	-60.17	-135.863		60.448	104.248	-42.837	11.253	17.216	30.558	-1.027
171.067	63.987	2.737	70.814	1.645	10.53		72.979	-24.902	76.5	44.335		36.302	-43.472	136.519		25.09	146.747	136.713	8.894	22.309	79.852	-22.425
171.2	72.348	-6.155	112.135	-1.024	53.548		39.748	-25.225	29.306	71.004		1.471	9.346	6.739		28.613	77.395	52.464	-47.917	-15	66.58	18.328
171.333	80.41	23.198	1.482	-2.397	-16.615		51.385	-10.072	45.629	82.651		37.239	-19.244	136.2		34.894	122.331	20.945	-4.559	-15.07	-17.124	-3.635
171.467	120.839	-6.897	17.832	-18.349	-5.742		65.553	23.489	72.987	31.913		88.662	7.318	-135.907		30.424	205.791	139.668	-37.944	35.935	138.81	21.216
171.6	120.065	-15.061	8.465	-10.765	-40.043		103.605	37.258	48.57	22.592		42.809	11.378	138.91		13.006	23.756	1.766	-50.977	9.932	215.002	-31.126
171.733	112.963	-7.029	138.042	18.616	-54.027		98.705	15.66	79.85	8.247		65.285	27.512	136.167		-4.425	150.599	3.067	-27.068	-13.004	-45.562	-5.938
171.867	92.078	9.998	-26.475	-28.471	-12.975		104.213	32.985	110.421	26.376		55.55	-4.084	-136.068		20.701	87.301	-19.056	-23.023	12.472	46.769	-27.434
172	122.185	16.263	-128.915	-33.332	-122.993		68.067	45.521	84.518	-8.701		24.851	-8.527	136.703		21.941	-23.401	-7.705	-37.047	63.492	189.199	-54.604
172.133	109.385	-1.111	150.763	-67.36	-35.73		77.375	-7.996	41.335	3.018		28.605	-13.967	1.988		4.049	45.822	31.953	-50.167	20.275	36.018	-11.308
172.267	100.364	-22.024	29.172	-77.801	75.948		57.852	23.461	53.148	-5.506		21.767	-19.267	-136.076		27.659	210.536	-146.028	-58.696	38.51	59.274	-126.929
172.4	67.189	42.105	34.445	-105.64	-89.394		36.726	36.039	51.733	-15.938		71.17	4.622	4.177		18.254	39.841	11.271	-33.62	37.624	-82.332	6.832
172.533	68.59	43.603	24.769	-82.843	-138.169		24.988	28.039	24.678	33.343		76.562	26.587	8.678		-7.927	266.714	8.712	-42.694	37.773	41.568	1.722
172.667	36.209	37.579	-1.026	-72.842	-127.573		35.722	74.63	38.053	32.221		32.978	5.167	29.34		7.832	10.462	138.683	-16.212	111.268	187.23	4.431
172.8	53.47	22.345	17.081	-64.625	-159.798		34.153	19.899	77.214	-7.401		44.027	-14.086	3.225		12.364	272.986	61.587	-22.081	137.15	48.661	67.606
172.933	98.584	22.602	-7.355	-37.993	-190.308		33.677	21.544	108.293	5.935		62.562	-28.491	27.968		32.983	18.564	14.795	14.08	104.678	-58.582	24.004
173.067	64.052	6.601	14.084	-69.436	-240.756		56.321	-4.373	25.098	9.388		23.731	20.307	167.636		-6.536	197.688	-11.072	-23.895	104.572	70.141	39.869
173.2	53.91	25.826	4.996	-77.137	-45.422		52.769	26.712	51.671	24.448		27.868	-11.379	-3.28		13.06	-13.725	-41.197	-37.005	86.682	116.178	53.538
173.333	165.051	51.286	-131.858	-48.703	-363.892		46.582	36.472	47.977	-7.404		144.139	-15.84	-30.673		20.913	222.753	-140.1	-42.345	122.997	23.277	37.409
173.467	80.306	9.487	84.01	-40.988	52.84		70.27	56.661	82.715	-5.9		-68.685	-22.311	-59.486		-12.395	-164.239	85.712	-59.647	48.952	29.95	16.584
173.6	46.733	-3.608	-68.511	4.343	-24.935		70.988	45.568	72.058	27.984		34.57	-22.953	-55.717		6.069	400.419	-139.991	-76.952	81.806	-15.25	-29.104
173.733	16.812	44.79	-145.792	-47.518	-35.894		38.766	87.802	37.955	7.321		-8.196	-19.016	-156.582		14.98	78.819	-194.701	4.451	21.635	-4.267	49.936
173.867	87.076	11.827	-114.686	-39.887	-100.855		29.19	81.754	55.862	-38.343		35.965	13.832	-196.303		-9.821	162.137	-128.117	-23.854	53.154	-165.644	-13.243
174	91.778	4.469	-87.474	-27.946	51.16		48.036	33.746	33.133	-9.745		49.705	-7.247	-147.955		7.625	161.413	-178.834	-40.794	45.027	-39.979	1.404
174.133	125.195	11.271	-128.08	10.366	-5.843		34.174	40.445	48.176	-22.571		-3.978	6.475	-118.137		36.547	150.893	-188.64	12.053	68.664	-125.983	-27.185
174.267	85.116	21.087	-157.809	7.764	-7.752		27.712	28.236	40.756	-67.318		28.206	10	-203.811		5.423	23.834	-274.261	12.524	83.983	-123.706	-121.059
174.4	74.846	62.093	-150.707	-23.269	138.21		4.352	44.322	40.717	-107.727		-3.04	5.902	-259.968		45.797	113.241	-135.297	-3.097	86.171	-141.364	20.793
174.533	-28.87	-5.575	-80.437	-5.784	-52.759		-2.755	109.113	29.882	-133.245		16.595	-12.817	-131.982		7.904	100.893	-134.964	-15.455	87.508	-229.804	119.027
174.667	215.464	2.499	-253.996	-3.822	-3.255		30.147	62.162	33.628	-64.319		-13.102	-8.169	-61.275		14.076	38.71	-135.055	36.988	46.806	-245.342	-122.306
174.8	60.414	20.125	72.647	-20.275	69.592		-12.156	37.988	-22.479	-45.318		-47.996	-7.996	-26.247		27.552	158.803	-271.161	-7.274	45.362	-252.224	-6.958
174.933	78.015	13.142	-77.52	30.407	58.861		-26.103	49.888	-44.127	-75.484		-157.15	-9.528	42.81		-13.759	151.175	-268.172	-30.956	54.55	-243.884	-3.695
175.067	21.862	-16.008	-28.583	59.668	55.652		-4.176	32.618	33.007	-75.569		-224.474	-20.374	-0.412		-7.256	66.339	-13.235	-59.848	10.289	-185.848	-9.748
175.2	44.033	-7.398	-54.19	-64.861	131.583		7.794	41.711	-27.866	19.178		-202.727	13.023	22.14		8.946	69.133	-271.244	-50.981	14.828	-252.054	-2.978
175.333	-58.834	56.541	-63.245	-17.121	31.357		23.667	47.843	21.727	-99.643		-161.861	39.614	23.445		6.395	67.411	-136.095	10.157	-9.678	-254.828	-9.841
175.467	35.521	13.592	35.304	15.103	3.005		76.825	24.216	15.773	-138.828		-167.477	-8.934	16.146		16.817	196.109	-136.804	-6.066	59.192	-233.768	-20.252
175.6	18.877	46.821	60.531	-13.023	115.666		14.933	85.224	6.499	-102.449		-101.837	27.549	6.362		9.385	-55.132	-136.193	111.334	79.685	-239.058	-6.308
175.733	48.67	1.388	178.57	109.196	-50.215		16.806	28.926	-17.928	-79.688		-66.999	32.17	-30.203		-4.203	172.829	-269.842	204.138	66.168	-194.985	-123.274
175.867	15.728	-4.402	133.893	123.269	157.111		38.503	29.691	58.566	-93.792		-78.817	-24.548	17.062		-11.077	27.736	-135.725	61.495	94.66	-157.427	-122.391
176	87.081	11.539	103.309	59.519	37.767		29.991	24.508	46.598	-143.761		29.986	-32.424	54.967		2.064	29.634	-136.495	30.337	123.246	-124.955	-16.453
176.133	-5.685	37.968	83.208	28.649	63.337		24.046	6.778	-86.061	-94.223		38.321	72.546	86.306		-2.247	18.754	0.392	38.368	148.734	-83.347	-13.517
176.267	-5.323	-13.777	64.635	42.469	52.049		26.292	9.533	-162.477	-81.098		58.102	41.584	112.171		15.166	227.952	-269.781	-11.846	93.027	-92.9	-8.165
176.4	-127.851	-9.34	32.395	23.216	83.064		27.414	35.018	-27.556	-148.496		42.401	36.721	96.356		2.498	93.807	134.998	10.427	109.123	-554.007	-121.534
176.533	-169.063	17.596	12.778	8.346	64.673		-2.329	4.17	-22.049	-29.059		53.632	40.154	91.456		9.284	55.02	-135.257	9.719	200.606	-185.734	119.726
176.667	-219.514	23.223	13.374	11.231	41.029		15.309	8.992	-22.064	-26.403		25.909	38.289	75.25		-3.929	-100.247	-6.17	4.937	115.253	-78.46	-28.886
176.8	-129.389	-14.713	11.404	-18.419	26.742		3.695	1.77	15.968	-27.2		10.031	22.126	73.064		-3.365	-7.211	134.905	-8.385	62.549	-118.283	-243.667
176.933	-150.6	-2.399	-3.036	12.375	47.734		-4.779	-7.283	37.384	-5.015		31.739	64.153	140.772		-25.299	-30.137	136.258	15.357	30.745	-127.534	122.848
177.067	-24.052	-12.013	10.343	-19.343	80.235		15.588	8.719	74.884	55.448		-20.813	24.685	191.983		-36.624	243.608	270.003	-12.407	132.712	-174.375	13.332
177.2	-289.184	13.862	12.818	17.91	77.278		-5.171	17.765	11.046	104.832		11.296	23.651	118.261		3.144	-104.736	134.751	9.854	48.223	-187.561	121.221
177.333	-68.178	17.051	4.143	-12.054	-49.612		-21.044	44.331	93.367	-9.587		-23.992	27.575	128.382		-45.161	-117.109	134.776	-8.277	125.712	-120.417	-9.935
177.467	-90.435	-7.236	-1.459	7.841	-48.334		11.679	39.867	56.952	45.67		-9.935	-25.536	25.812		-66.221	202.158	-8.408	-13.003	-64.508	-267.91	119.71
177.6	-53.459	45.808	2.281	-9.548	-26.602		6.89	-4.347	44.169	18.198		-17.776	-16.726	32.494		-61.369	43.759	135.077	-4.908	58.055	-214.49	-120.833
177.733	83.464	16.264	-6.862	-16.948	32.983		-13.038	-37.317	-34.228	24.641		-1.229	49.249	33.13		-79.344	86.989	269.483	23.421	156.362	-183.129	27.206
177.867	-5.294	8.111	-4.376	-7.481	71.854		12	15.391	13.463	-20.396		-33.917	49.434	23.882		-59.889	111.085	135.593	-34.42	78.055	-263.352	119.767
178	17.686	16.067	-14.941	6.366	85.74		-3.29	19.677	130.943	-70.74		-4.241	42.117	10.174		-37.59	44.249	0.069	-7.558	117.94	-57.752	-121.227
178.133	-12.403	16.585	-14.757	-21.367	68.049		3.606	-6.584	82.388	-41.323		34.625	69.437	41.089		-13.698	-20.495	268.883	-98.289	107.687	129.088	-4.982
178.267	39.959	-12.399	-1.435	-5.182	54.69		-13.836	22.932	51.762	-37.577		-12.846	54.383	82.542		-25.443	173.817	-12.126	110.927	76.279	11.051	119.645
178.4	68.784	2.118	12.633	11.194	18.917		-3.786	11.48	-2.921	-27.673		3.713	32.015	135.281		-20.99	65.77	136.631	-5.152	24.011	10.113	-244.499
178.533	194.751	2.401	-36.59	-21.831	33.647		13.737	15.609	-36.297	-27.206		-9.614	11.724	46.627		30.698	40.771	135.713	-9.748	48.022	3.561	9.239
178.667	-45.339	27.376	-76.626	-26.805	29.662		42.418	-9.005	34.864	-59.385		-13.597	-8.314	48.544		-10.347	107.725	135.426	14.696	-12.002	122.267	-1.436
178.8	85.278	-7.113	53.86	7.623	36.73		8.371	-16.484	-2.424	-2.315		5.656	48.47	80.14		-58.457	-118.76	-17.96	-58.407	153.042	29.564	-121.815
178.933	40.001	8.977	-16.344	-1.829	25.054		23.498	28.184	53.251	-107.7		-5.373	17.303	57.395		30.808	94.413	272.776	-60.54	70.94	248.03	7.359
179.067	138.091	-20.546	-35.436	-9.895	-85.298		7.085	3.038	58.051	-120.205		24.724	9.266	39.48		-28.853	311.849	-7.581	-150.714	123.001	45.52	-19.617
179.2	63.591	26.387	-45.855	-20.79	118.189		14.985	41.355	52.607	-198.876		113.755	-14.548	35.567		-7.198	91.773	137.282	-102.678	113.82	-123.894	-2.408
179.333	64.521	-15.159	4.161	-51.225	17.079		39.349	2.791	76.582	-117.616		50.078	-13.27	74.882		4.971	-127.31	139.338	-51.739	53.835	18.295	-5.529
179.467	76.214	-5.762	-105.676	11.839	-2.581		-62.82	6.613	39.01	-21.897		-103.719	-14.524	80.807		-9.108	194.758	135.908	-75.526	11.391	25.133	22.181
179.6	98.313	17.455	-15.892	7.801	43.28		4.399	8.936	27.891	-150.26		23.734	-5.142	74.902		-24.265	59.916	-40.648	-37.851	-9.566	0.783	-122.015
179.733	-53.147	24.483	96.564	15.741	16.493		9.231	3.295	12.539	-169.261		47.613	-111.943	77.068		10.776	248.049	-24.995	4.128	30.92	1.823	-5.166
179.867	41.66	14.662	-22.062	-23.073	-65.649		22.642	-22.028	22.229	-25.018		32.555	-192.529	51.695		15.636	107.739	-27.068	-2.785	-4.699	119.904	-14.737
180	73.152	-18.162	-246.224	-48.647	12.078		115.673	-27.201	41.379	-130.072		4.571	-157.298	-13.308		-24.165	-78.941	-38.658	-30.347	-19.758	-120.596	-2.489
180.133	82.173	-8.659	170.961	-28.205	203.029		-115.214	-58.011	59.835	-175.632		-22.099	-171.469	11.098		-59.469	115.359	135.46	-25.931	50.37	121.109	-121.141
180.267	59.052	17.183	3.045	-83.608	40.557		99.634	-52.754	61.092	-83.749		-28.797	-88.849	-29.566		-45.298	300.1	138.288	-13.467	92.25	123.98	-6.699
180.4	211.958	251.146	119.63	-64.675	61.462		302.16	378.296	69.488	-107.346		32.313	-48.782	438.97		77.262	261.861	404.98	336.65	345.06	357.367	10.23
180.533	235.856	428.73	398.415	-63.402	409.754		347.513	462.463	61.198	-66.663		264.173	330.773	402.224	-6.31	106.172	241.402		535.319	255.657	359.171	244.649
180.667	385.512	339.775	442.416	-65.426	310.04		322.077	312.706	84.003	-8.402		481.147	530.013	322.029	552.026	170.437	256.207		444.79	288.273		400.456
180.8	167.936	293.169	443.427	-27.332	305.743		307.151	436.878	70.676	136.217		340.666	463.233	294.322	414.036	84.223	204.547		352.269	401.099		122.725
180.933	362.939	258.277	419.908	-64.157	273.007		358.69	219.481	85.308	315.725		228.808	360.948	274.696	10.028	113.833	183.755		368.247	385.14		133.563
181.067	388.859	228.609	298.824	-52.736	235.576		392.922	224.934	53.072	220.434		13.268	293.441	323.745	137.412	95.486	343.147		275.66	335.263		90.575
181.2	316.08	268.118	355.081	-52.804	207.164		440.388	232.111	231.597	133.169		198.906	273.537	259.363	-5.722	73.191	302.365		204.143	240.82		142.623
181.333	327.916	306.461	360.553	-25.041	155.616		333.425	220.645	-117.605	129.367		203.76	166.37	240.346	-4.182	105.892	199.037		195.181	185.514		114.657
181.467	332.688	272.526	291.095	-58.861	157.437		112.407	302.976	117.304	148.977		152.928	156.595	232.584	137.851	44.54	262.513		145.208	223.888		107.333
181.6	312.628	216.627	337.596	-39.973	110.235		229.873	133.764	-118.929	114.236		224.628	134.911	186.764	136.725	2.908	111.869		162.652	262.917		65.441
181.733	305.448	262.888	339.959	11.338	59.416		114.041	190.184	121.856	84.958		101.87	147.899	152.045	951.074	37.193	281.482		119.435	262.288		62.168
181.867	308.689	285.945	171.771	-34.627	217.75		339.331	223.015	17.919	121.203	11.332	261.524	135.771	170.916	33.768	25.738	186.711		178.152	245.598		69.301
182	233.333	265.247	218.042	-92.725	111.055		225.473	154.624	119.514	62.671	14.11	110.758	130.018	164.256	139.06	12.702	389.746		139.985	499.374		76.845
182.133	247.87	316.67	174.529	-122.216	-24.339		113.182	245.694	119.046	53.38	12.556	81.851	111.353	345.566	139.436	28.819	174.875		140.993	236.931		80.273
182.267	280.673	338.79	161.491	-140.121	53.288		225.6	260.08	-117.226	53.652	20.618	87.057	117.646	203.978	139.031	-6.868	310.464		56.55	181.811		50.499
182.4	282.767	298.32	236.49	-62.845	37.993		226.246	260.711	120.945	30.315	2.299	-80.226	155.034	87.365	-10.448	15.153	130.065		23.6	195.295		91.02
182.533	276.212	306.985	203.297	-72.782	170.252		228.741	342.992	118.319	31.822	-6.198	71.191	292.072	296.153	8.099	17.387	353.89		94.314	193.179		61.901
182.667	303.717	265.657	228.738	-14.565	-13.898		115.573	338.477	-116.436	-6.654	142.02	305.541	144.603	218.741	138.656	-18.481	133.782		204.536	182.509		27.216
182.8	309.897	318.615	225.528	-8.034	37.583		339.255	359.614	118.931	114.97	-140.983	394.61	70.683	261.575	-7.603	19.525	374.771		131.388	239.356		65.675
182.933	314.841	262.621	196.695	6.747	34.132		226.048	380.08	-119.892	55.887	141.95	121.215	180.835	257.343	137.677	-10.885	202.46		171.014	205.353		56.224
183.067	445.182	281.451	246.611	-12.02	153.446		-114.192	387.269	-5.849	22.708	-141.632	160.531	138.99	250.944	-3.116	12.032	171.781		185.365	227.971		93.432
183.2	183.359	244.599	243.665	4.807	19.503		224.973	315.902	-22.588	32.432	144.161	97.185	216.823	140.156	-6.829	14.105	86.7		190.112	210.001		9.569
183.333	313.283	226.863	285.865	49.328	130.788		-3.566	243.237	-117.472	-14.535	2.975	111.55	226.228	317.947	138.065	20.037	101.249		231.344	194.851		6.247
183.467	206.352	260.143	251.77	4.535	86.1		112.662	347.762	-10.391	-18.164	147.961	78.66	174.092	89.009	-6.916	6.257	195.681		218.546	216.268		11.399
183.6	229.591	276.738	244.653	-24.878	53.598		-0.418	400.261	116.198	3.454	59.02	121.355	212.024	163.766	15.464	-15.78	336.533		160.337	164.405		-122.182
183.733	270.751	278.17	199.719	37.398	37.772		112.078	533.25	6.186	4.752	11.47	63.843	226.101	186.167	91.785	21.164	-33.523		185.172	206.36		-170.26
183.867	330.866	415.202	200.244	23.954	35.978		112.87	468.49	232.999	13.746	15.783	48.847	223.045	159.111	120.655	40.223	228.545		127.643	215.088		-90.044
184	244.538	291.603	206.045	9.391	-6.407		112.719	346.953	-116.302	-31.679	30.422	31.459	157.79	282.411	277.026	-19.376	101.432		137.037	206.004		19.463
184.133	269.92	176.101	174.485	9.447	5.224		112.03	318.768	2.324	23.339	-26.45	103.511	207.465	89.8	135.771	26.736	268.81		189.514	197.742		-22.463
184.267	272.494	265.955	152.084	-10.94	29.717		113.522	333.863	116.409	-7.649	5.708	97.01	237.999	133.309	120.586	44.57	52.809		184.902	220.291		6.951
184.4	287.049	288.377	149.227	3.914	54.292		-113.276	285.262	-116.364	20.708	39.237	143.51	194.69	147.682	125.398	-7.074	144.215		214.449	278.612		29.84
184.533	267.129	270.012	128.29	-2.203	65.99		114.422	354.172	1.883	-19.664	-120.436	136.955	238.962	141.128	65.491	12.771	235.246		194.74	210.718		4.879
184.667	259.359	283.739	100.505	14.068	65.651		17.854	304.759	116.732	-20.167	53.414	111.769	165.626	128.541	125.843	24.386	-33.022		161.989	124.375		4.486
184.8	251.812	339.892	128.136	-6.534	30.278		-112.024	356.39	-115.979	43.219	27.759	88.317	146.002	127.659	111.722	25.173	327.779		124.627	175.431		6.22
184.933	184.558	300.491	143.129	26.758	14.1		119.358	439.586	-116.247	20.074	19.391	83.509	168.457	105.192	108.35	26.766	118.184		112.957	246.828		-3.77
185.067	172.736	288.232	127.892	7.101	70.085		12.73	430.46	18.524	21.632	15.471	72.7	86.897	130.323	97.801	-12.896	138.34		144.97	1.71		3.42
185.2	209.072	302.258	146.72	24	-60.352		117.373	417.868	12.403	-1.315	54.85	105.161	129.173	127.169	106.018	12.098	216.68		127.151	245.104		30.763
185.333	231.063	352.532	76.37	-1.941	112.926		-13.317	349.556	15.677	-24.776	-14.875	146.31	141.063	266.34	-38.442	7.561	105.807		108.013	124.585		-124.091
185.467	202.961	299.449	199.64	-10.686	3.561		1.65	224.887	118.109	24.8	17.735	110.644	101.047	136.514	87.724	6.877	269.563		80.292	245.235		136.332
185.6	211.47	293.9	187.855	-0.904	3.36		-3.941	320.615	-117.811	6.654	16.81	120.412	141.088	-27.555	40.227	-8.399	273.708		80.63	122.803		-10.343
185.733	195.491	243.74	347.653	12.439	12.984		-113.111	180.477	-115.91	23.496	3.611	139.245	88.125	178.689	100.32	21.638	55.813		137.156	123.277		13.392
185.867	193.948	225.728	218.376	-9.78	-101.04		114.31	127.202	116.345	2.372	22.112	107.877	92.859	42.622	55.559	2.006	195.754		70.968	245.115		-41.782
186	269.598	193.244	158.348	28.05	2.042		-113.338	90.621	9.288	-18.098	8.294	119.977	53.391	39.053	12.628	-12.747	194.288		121.977	125.281		10.242
186.133	270.456	178.77	169.254	10.236	-6.101		-113.422	-16.882	-117.3	33.867	-1.233	68.888	-43.414	68.74	19.421	-2.725	208.05		162.557	-3.984		-29.65
186.267	189.917	134.833	150.037	-8.272	8.154		-18.209	67.603	117.08	-9.325	4.17	77.764	127.27	36.207	7.089	141.194	215.125	171.059	149.808	245.888	112.865	29.012
186.4	210.048	141.084	164.436	-0.426	-18.494		-3.661	155.582	-232.411	46.452	-6.272	65.041	189.93	24.105	14.921	-13.308	-84.337	17.282	101.767	-78.931	370.362	10.188
186.533	153.602	114.899	128.761	4.563	9.145		112.304	86.527	116.463	0.327	10.964	156.476	-41.59	44.176	-6.182	8.312	236.295	25.551	154.409	46.468	380.895	-12.571
186.667	186.275	152.263	159.506	3.774	-63.014		113.184	101.708	-115.95	-133.559	2.369	7.317	138.923	45.324	-7.648	-123.341	45.72	9.158	92.269	135.83	388.596	-124.376
186.8	134.68	101.708	147.779	-2.095	9.259		-115.079	78.337	126.122	212.944	12.953	69.033	-135.843	60.066	-16.177	-6.656	-49.817	17.187	47.941	136.613	358.5	124.462
186.933	91.205	99.164	219.459	8.428	-6.785		114.397	181.296	238.188	60.849	-15.489	-125.168	54.593	55.584	25.171	3.842	40.134	35.782	73.441	184.194	318.499	-19.052
187.067	142.221	105.96	182.261	-3.027	-49.48		-113.304	217.928	117.064	84.325	-0.661	86.258	2.745	139.786	-28.49	-0.772	133.074	7.331	71.757	25.972	286.817	-3.604
187.2	92.323	76.081	236.725	1.111	-53.686		1.034	143.498	233.1	61.813	33.516	91.009	10.373	-132.598	31.279	-26.342	22.83	22.692	49.244	367.016	286.56	5.474
187.333	65.638	111.019	188.437	28.045	1.316		114.571	143.684	10.278	41.162	-14.181	52.243	15.342	177.367	-10.044	34.568	114.84	4.951	103.597	87.252	280.4	-3.351
187.467	72.285	106.832	233.524	5.106	-32.301		-7.946	103.928	5.284	37.151	12.22	196.157	5.806	16.054	37.343	-56.785	15.632	-17.525	53.575	139.553	254.021	10.228
187.6	88.152	146.878	255.023	2.927	-15.225		-20.974	137.955	13.313	69.927	-3.913	87.784	130.621	-15.614	-128.888	-8.952	126.239	-18.324	14.801	122.24	277.695	32.081
187.733	47.458	191.548	209.123	-1.083	-19.481		-4.52	77.995	2.478	63.856	26.431	38.387	12.919	-17.809	467.13	-32.85	287.96	19.344	26.476	109.802	227.585	5.687
187.867	118.178	168.045	218.017	-3.557	2.624		-113.855	40.166	7.782	12.549	5.31	25.889	196.088	28.793	83.224	-36.205	111.608	-159.038	6.583	36.286	189.144	-98.734
188	106.888	251.806	127.374	19.072	123.331		5.846	-4.155	1.949	-1.618	-26.467	19.984	49.282	-138.468	79.72	-21.934	252.903	21.422	48.185	71.316	8.944	-122.844
188.133	63.678	94.75	136.91	-9.093	-133.089		115.4	86.85	-116.162	63.052	92.181	-54.705	156.595	-8.682	24.826	-15.138	-43.37	-402.685	13.878	25.907	128.631	233.816
188.267	138.17	199.593	138.367	-5.149	-20.502		7.276	63.435	20.69	3.526	53.086	186.48	167.535	95.636	52.082	-9.547	172.137	-212.797	23.72	110.493	-315.276	-81.112
188.4	23.629	175.587	160.815	-0.885	-6.971		115.602	70.796	14.062	22.222	95.516	42.857	247.896	-15.94	15.158	-9.719	199.576	-251.386	22.528	-35.459	-140.068	113.709
188.533	165.507	211.194	131.048	-13.626	-20.58		-14.001	-7.138	-0.684	9.964	44.213	23.601	137.539	6.564	67.437	-17.324	68.348	-217.129	15.63	49.136	103.703	-16.699
188.667	130.086	201.327	122.194	38.084	50.177		0.606	43.342	-116.484	11.9	44.241	48.503	54.233	12.415	50.506	-23.784	156.776	-216.594	30.213	65.728	57.312	5.367
188.8	52.01	158.086	250.406	5.647	117.558		6.353	23.335	-116.283	33.419	50.698	26.151	60.061	-37.651	131.107	-28.086	183.006	-158.501	50.686	39.708	55.552	34.09
188.933	88.859	200.977	107.693	-6.799	-8.745		6.552	-16.923	-9.929	3.678	23.277	63.85	126.883	-10.941	99.328	-21.422	-34.351	-52.103	44.326	377.667	104.842	-22.146
189.067	95.08	188.516	-31.802	-5.196	121.565		9.232	-53.162	-232.03	-2.515	8.456	63.913	132.631	-21.262	58.275	10.66	52.379	-98.1	16.986	121.311	114.503	151.127
189.2	119.901	168.724	167.429	-1.97	86.246		116.769	272.66	0.269	8.257	-0.988	75.476	118.177	-33.566	-62.16	-7.134	-403.589	-37.912	16.345	113.435	148.058	106.274
189.333	164.771	253.559	18.46	22.858	-7.469		2.109	29.696	-117.509	-24.633	-37.525	10.276	-7.792	-170.386	8.809	-28.227	-13.723	140.094	25.977	87.483	121.774	22.347
189.467	116.343	73.491	47.339	19.96	216.638		2.166	-57.411	-116.641	-24.524	54.418	82.542	65.616	-142.179	247.136	-37.7	-234.411	-132.919	-16.848	-39.046	139.272	132.423
189.6	117.832	147.469	204.546	-25.399	46.27		227.109	47.621	16.265	-2.002	2.956	-4.388	37.805	-123.634	46.941	-17.012	67.219	105.656	49.603	141.134	133.182	-148.366
189.733	113.597	164.492	82.832	5.244	95.015		-113.142	12.493	-231.96	10.72	40.139	31.233	132.317	-30.82	35.144	-28.053	-84.481	93.353	44.711	-31.526	178.968	301.094
189.867	117.417	95.34	-10.278	3.726	53.899		3.627	5.716	116.39	-9.994	1.902	-1.376	80.701	-17.378	12.591	-6.643	35.14	21.264	121.677	106.368	171.387	-169.342
190	119.499	141.076	218.157	7.849	30.582		15.146	93.451	-115.746	-29.772	35.145	-126.513	53.891	-13.763	59.561	-9.056	50.982	43.398	67.289	-25.251	184.414	56.723
190.133	71.992	108.624	21.77	-4.647	68.18		-112.178	-54.81	20.77	-4.274	15.623	43.029	79.783	16.47	-33.637	-21.116	48.653	51.01	37.688	4.148	115.407	-61.487
190.267	87.589	125.964	128.634	1.78	11.116		228.704	-4.649	-118.565	-14.805	21.559	48.191	77.786	-39.728	-32.456	8.296	-5.031	28.33	108.001	41.477	132.203	-16.556
190.4	78.413	88.589	81.642	4.967	-49.22		16.412	42.772	18.189	10.236	-1.285	-11.508	87.55	54.223	-40.128	5.348	28.007	38.499	90.035	124.975	149.043	20.176
190.533	113.925	166.071	70.908	3.635	19.285		116.889	13.387	9.457	-25.712	-47.146	-2.427	101.985	50.688	40.868	-6.671	17.707	116.7	79.356	136.991	156.795	108.057
190.667	105.988	249.38	101.292	-2.53	5.036		17.35	30.334	-116.999	-21.347	141.545	64.159	65.194	-27.752	-4.9	26.039	2.888	139.638	19.511	149.839	87.727	-142.505
190.8	101.954	27.609	35.332	-2.021	75.189		115.463	72.084	115.325	-18.883	-90.969	137.75	78.099	45.738	156.832	-2.357	-47.585	-41.494	26.654	130.48	109.274	151.492
190.933	65.88	60.92	45.132	21.746	17.776		1.066	55.843	1.479	-49.184	-3.785	-123.546	105.689	39.915	71.669	28.098	21.812	77.37	34.505	39.472	126.778	9.367
191.067	36.102	52.383	34.411	-22.962	11.386		114.741	2.63	114.925	-2.333	58.495	85.973	104.044	6.737	19.305	-38.375	26.941	19.027	46.255	90.777	106.645	-9.838
191.2	8.689	131.853	-11.572	50.452	-6.122		8.847	141.343	-117.995	-24.679	31.125	43.744	55.702	93.507	46.266	21.008	-13.838	66.487	91.991	110.07	44.74	27.579
191.333	7.041	147.237	30.764	-4.235	98.894		10.183	77.928	115.925	-14.286	44.335	-5.993	67.713	107.23	40.237	-16.049	-29.832	78.389	88.123	92.629	24.481	-34.63
191.467	-1.72	181.332	100.735	12.912	-102.561		115.977	11.798	-116.149	-0.361	13.039	41.948	50.311	-40.034	19.024	-8.822	24.538	45.509	89.58	81.827	67.163	1.28
191.6	66.356	152.488	49.46	33.974	85.705		5.393	4.414	116.528	-29.279	23.55	21.025	6.914	145.8	62.99	-19.542	-42.856	36.282	41.639	98.718	102.289	24.073
191.733	105.012	151.465	57.634	27.448	-129.586		227.551	23.994	12.32	-5.004	2.85	-15.045	21.91	-141.508	-90.24	-4.126	69.277	118.344	82.645	108.207	57.216	-14.041
191.867	127.521	125.743	84.602	-24.123	81.248		113.214	41.18	-116.297	12.523	15.796	24.097	142.385	57.204	114.247	112.17	32.71	82.458	62.658	101.784	58.188	9.534
192	213.297	381.67	102.488	-40.934	-122.93		113.235	-4.717	116.415	-134.805	-20.973	143.013	42.469	-329.638	-140.962	11.022	25.712	139.164	92.853	57.957	19.993	-121.311
192.133	84.349	-138.764	108.511	22.993	14.468		113.548	21.085	-1.791	96.854	20.606	31.579	109.292	-31.927	158.793	-8.946	8.275	36.622	88.61	93.433	54.175	175.517
192.267	104.799	74.149	84.227	-83.146	91.686		-0.677	44.775	9.341	15.107	27.078	-3.462	46.937	-18.564	28.525	34.923	69.895	90.112	49.26	48.215	80.375	5.899
192.4	170.55	159.784	98.704	-69.241	-93.106		-8.363	113.11	-346.993	3.234	18.04	-85.78	-3.373	43.014	-63.32	-122.097	-113.413	113.21	83.505	37.053	93.545	-4.438
192.533	13.389	163.494	78.418	-56.872	-14.017		113.103	126.564	-116.644	-13.432	-2.416	6.319	56.417	18.652	128.796	6.828	74.759	155.063	83.604	68.832	137.885	1.426
192.667	166.687	153.067	173.54	-65.132	-27.792		-1.15	75.308	-232.01	-3.423	-44.458	116.12	23.437	-30.962	31	13.974	75.948	141.738	105.441	100.337	25.771	-10.416
192.8	177.056	173.939	-60.663	-22.165	13.679		5.892	67.611	-231.739	3.629	14.725	121.642	30.637	37.364	-6.194	-16.54	34.901	177.86	63.567	83.073	-49.054	-119.222
192.933	122.504	230.646	7.516	-25.899	-53.589		9.036	102.206	-5.535	25.998	-10.07	72.954	26.398	43.588	28.395	8.803	33.385	167.607	48.994	69.997	90.042	-62.575
193.067	151.793	183.053	44.852	-44.041	-48.09		-3.737	81.011	-116.409	2.023	15.34	107.228	-20.552	-15.089	-107.397	21.927	81.452	91.045	89.944	72.238	-94.711	-17.208
193.2	134.256	165.306	7.635	-19.039	-215.6		6.913	35.927	-116.209	-3.727	-5.968	36.381	11.286	342.552	122.306	6.793	25.626	111.669	76.816	77.884	43.82	-26.952
193.333	100.526	249.477	32.141	-47.97	-123.639		113.551	75.234	-116.164	-0.951	-19.872	165.296	-18.392	270.454	-146.399	20.532	22.151	133.694	90.743	76.91	-143.191	-248.919
193.467	121.887	107.258	108.831	-28.683	-99.742		114.157	55.059	-116.358	-25.541	44.271	85.094	33.523	-236.001	132.737	-13.4	74.766	-26.649	61.753	100.137	-103.258	47.217
193.6	119.277	195.228	398.214	-23.742	-51.362		-113.792	60.453	-116.209	-3.02	71.596	52.933	40.772	57.738	23.01	26.569	88.54	15.138	57.062	85.165	-27.531	-42.436
193.733	117.208	198.321	331.05	-43.13	-13.421		113.874	65.794	-116.183	-23.916	31.287	38.202	22.836	25.949	-20.765	4.302	150.187	-14.505	79.543	129.146	-37.399	-111.76
193.867	121.753	147.721	45.573	-26.155	69.672		1.413	59.435	-116.382	-36.431	77.386	60.198	42.029	-442.943	13.135	25.171	130.682	-21.445	62.435	86.29	44.662	-43.629
194	162.456	167.746	129.974	-42.621	24.059		-2.588	40.87	-6.377	-32.025	41.397	-20.47	76.965	-4.076	-10.908	-4.384	49.744	19.594	74.355	107.368	84.598	-80.715
194.133	154.671	122.711	94.54	16.043	55.862		18.354	104.342	-116.153	-25.043	40.224	-108.973	310.059	584.824	7.79	11.303	28.761	-48.474	78.533	86.074	-15.741	-58.976
194.267	153.291	137.946	183.603	-59.992	16.403		114.236	47.545	-4.8	-4.904	6.911	14.292	97.416	234.242	-19.028	-24.937	-250.417	14.386	66.42	81.154	15.011	-88.016
194.4	114.717	171.021	131.48	-37.864	-3.706		-14.926	26.218	-116.202	-1.396	12.075	15.16	159.773	-12.195	10.93	8.99	-242.981	-26.41	53.216	60.705	-16.222	-100.203
194.533	120.79	130.373	156.219	-19.375	41.594		1.638	79.855	-116.148	34.177	-3.896	39.565	103.713	226.617	-1.345	-0.97	-303.063	-114.99	132.258	120.769	26.156	14.6
194.667	150.208	250.657	153.256	-59.598	-16.912		9.94	107.655	-0.696	-4.73	-2.739	146.068	138.484	-72.673	-3.067	-12.367	-126.991	-131.818	128.008	77.257	79.456	-123.43
194.8	190.142	93.981	153.733	-10.109	281.945		113.468	52.383	-16.149	-89.302	-302.184	-52.22	139.227	141.672	25.258	140.648	-135.228	-447.346	18.025	11.814	87.73	-34.071
194.933	163.662	166.3	119.673	-24.313	118.494		10.526	88.736	116.026	3.637	-175.23	26.991	120.527	271.88	-27.572	-90.843	-244.344	-240.439	186.978	205.548	36.023	-89.87
195.067	129.146	145.748	121.015	-27.845	88.676		-226.783	79.613	-116.399	-52.007	-233.22	40.577	105.015	-14.044	-23.741	-30.049	-254.837	-183.495	62.986	-31.377	72.867	-88.661
195.2	154.177	183.451	128.717	-16.684	177.461		-226.654	67.281	-115.712	-26.499	-155.404	40.681	110.298	-6.899	20.723	38.738	-206.971	-138.089	81.94	217.66	30.169	-109.27
195.333	153.554	147.569	74.925	9.412	152.4		-226.524	70.447	-116.414	-36.534	-96.312	144.772	108.1	-14.965	1.405	-8.564	63.142	-103.576	22.405	17.806	5.887	-129.47
195.467	203.303	138.654	126.18	12.365	187.397		-112.343	60.891		95.089	-99.598	7.936	91.018	-24.832	9.302	9.883	-89.376	-221.239	267.133	128.472	54.357	-69.896
195.6	177.921	149.883	46.318	60.598	134.854		4.698	72.999		5.97	-95.3	61.61	77.51	46.131	-21.41	21.044	-73.024	-247.286	177.865	108.736	-99.597	-83.241
195.733	118.306	148.671	92.969	37.447	73.339		-224.672	71.806		-7.166	6.841	6.598	37.022	65.966	28.041	15.069	-119.215	-172.405	115.313	98.994	100.517	-40.112
195.867	225.828	148.233	94.569	37.919	76.04		-337.233	62.548		-32.277	-2.391	-27.269	69.369	-26.621	-30.899	-9.913	-181.228	-131.515	108.663	84.06	20.642	-43.284
196	80.989	256.461	172.336	13.086	37.823		-114.5	102.004		-30.6	-17.734	-87.937	19.934	69.691	-140.015	13.287	-215.179	-12.253	115.435	88.344	-6.821	-126.601
196.133	169.596	111.253	135.869	31.114	85.653		-224.353	115.472		32.028	18.314	131.392	80.938	16.516	55.549	13.914	-222.284	-295.857	157.483	19.289	-2.511	-7.704
196.267	76.422	178.206	167.64	6.776	25.967		-224.957	53.396		-1.034	-3.443	69.853	50.166	-12.573	103.415	-9.556	-281.931	-205.527	110.925	109.657	-18.279	-161.109
196.4	87.709	178.574	265.757	-16.912	8.04		112.556	32.636		-0.72	-3.4	26.851	71.993	-15.323	15.513	44.88	-367.443	-138.787	132.301	101.607	10.544	-153.444
196.533	73.665	171.888	119.045	-1.998	19.316		-224.57	133.994		7.125	-15.427	29.68	77.381	23.253	20.223	-12.809	-164.202	-185.61	115.27	113.557	15.001	-37.537
196.667	142.897	150.819	93.426	15.708	-14.042		-112.929	86.037		-19.668	-20.984	17.719	76.939	-34.19	7.588	-7.801	-45.577	-159.718	140.921	33.746	-58.607	-62.134
196.8	154.982	177.891	174.974	33.218	-18.059		14.335	128.499		-19.687	8.438	34.988	55.067	9.207	94.759	140.584	-26.464	-106.253	125.443	128.992	60.541	27.214
196.933	177.485	202.776	181.344	53.426	-8.006		-223.511	85.734		13.019	-27.184	13.215	120.627	84.941	30.603	-7.984	-33.024	-163.094	126.214	90.504	47.829	6.344
197.067	97.423	144.066	214.447	-15.362	-3.664		2.147	74.082		17.718	17.263	-1.336	85.013	30.802	18.158	-9.987	110.443	-161.799	201.632	68.045	-6.342	-33.898
197.2	161.94	128.788	264.015	10.86	11.267		17.823	91.388		23.204	19.352	48.956	118.316	57.68	40.085	-25.013	-12.439	-174.49	124.162	98.466	-7.417	-13.522
197.333	93.85	256.524	56.983	11.522	-116.844		-113.748	127.678		-21.965	-141.997	-32.25	139.727	62.508	-33.361	-74.82	103.567	-124.452	164.232	56.327	8.889	30.466
197.467	97.386	-102.405	248.844	40.454	115.045		-3.038	118.251		25.452	162.699	-34.378	59.681	48.866	36.118	3.311	266.99	-140.705	35.59	66.622	10.984	42.578
197.6	128.661	155.186	173.928	-12.232	-49.428		-0.729	53.726		16.282	-16.383	22.986	116.926	61.982	-82.361	-19.239	107.699	-150.357	204.236	117.253	7.526	55.991
197.733	137.797	132.28	125.232	16.646	7.828		-3.96	99.671		9.19	-15.152	35.882	6.931	13.575	25.633	-10.23	141.58	-115.005	81.564	52.04	24.845	33.852
197.867	101.303	112.912	166.026	-17.41	-29.337		-3.155	95.576		-4.526	7.221	43.352	80.097	36.742	134.502	39.83	221.613	11.972	115.513	35.89	16.428	62.335
198	42.012	132.424	162.331	8.674	-4.574		112.811	123.248		17.225	5.16	46.35	9.019	-31.579	2.639	20.878	125.552	3.912	131.981	115.163	37.451	-267.791
198.133	180.207	97.348	183.199	2.457	-3.451		-113.254	72.307		-8.632	-29.952	43.47	34.912	26.224	18.723	11.606	256.759	-78.2	166.631	73.96	-4.466	-292.509
198.267	137.817	162.613	162.615	21.547	-16.355		-0.649	69.303		-9.033	31.794	2.555	143.599	31.255	34.232	-4.365	189.562	-158.401	95.871	37.103	47.224	-244.571
198.4	108.073	99.264	129.196	18.474	-16.049		112.933	72.045		-13.973	-5.455	22.503	107.457	24.41	48.033	-2.752	147.467	-134.12	134.666	94.679	-8.677	-134.249
198.533	75.781	196.83	158.969	9.434	-14.237		113.057	79.253		21.331	28.77	30.63	63.443	-12.289	-7.403	2.83	89.62	-174.589	156.121	88.368	-50.551	-78.975
198.667	127.725	248.442	111.181	-13.303	-140.855		112.468	75.734		133.442	-4.592	6.024	138.962	21.961	-142.452	-11.52	-20.454	23.903	144.494	86.866	117.461	-245.073
198.8	32.322	145.543	129.764	4.398	98.848		11.425	126.036		-169.492	147.376	8.988	6.516	22.808	120.683	-10.747	220.815	-161.333	82.825	68.505	13.317	57.431
198.933	-263.506	163.627	120.567	3.696	-26.447		112.676	90.28		34.717	62.337	46.065	-28.964	26.571	47.736	-33.279	225.554	-54.768	93.498	75.951	38.471	-170.058
199.067	-297.418	177.565	116.145	8.58	-106.405		112.902	92.742		11.962	3.034	18.357	-3.332	26.536	10.756	4.978	8.373	135.253	140.853	84.703	52.578	-239.438
199.2	-239.176	146.795	145.954	16.769	51.8		111.921	77.493		35.496	19.093	23.37	19.081	20.978	73.179	4.433	267.207	52.664	32.256	75.735	77.549	-159.477
199.333	-295.956	155.784	79.077	-10.69	-17.006		-3.779	163.399		71.407	-13.547	37.606	49.15	-16.954	42.108	16.02	206.558	51.968	282.277	97.925	47.747	-115.714
199.467	-285.04	153.442	127.053	-10.878	-1.277		-3.35	11.775		63.73	33.227	1.362	83.805	-25.779	12.391	-57.014	8.448	20.416	114.258	76.988	17.55	-120.772
199.6	-173.644	149.749	136.592	4.207	-34.679		3.958	124.775		69.724	-20.266	7.935	47.192	33.713	-62.992	-25.766	165.475	53.461	104.677	86.661	39.217	-56.487
199.733	-36.928	210.186	186.38	70.485	-89.306		113.144	86.843		68.501	138.811	9.731	102.278	-85.18	58.513	-47.249	33.715	-14.389	108.28	117.586	26.792	-47.685
199.867	-4.914	113.912	50.575	7.077	-87.95		-113.367	117.102		34.073	-10.512	-11.09	63.639	-100.48	59.525	-36.915	191.153	112.079	17.191	66.855	-12.972	-137.58
200	-42.677	377.727	97.929	-24.054	-154.425		2.737	157.052		131.058	-7.241	-2.73	138.126	-139.63	-140.677	-60.58	72.065	262.841	185.786	49.587	10.054	-127.496
200.133	-42.027	-37.014	118.772	72.112	-106.155		0.039	121.215		-71.926	50.78	-10.225	-58.557	-69.509	255.458	-91.761	135.569	22.615	153.083	130.846	-8.662	-159.538
200.267	46.456	133.75	168.34	44.421	-178.461		2.692	111.686		4.453	23.281	-117.498	12.876	-44.504	-63.97	-40.27	88.166	200.984	232.278	16.952	-5.358	-156.672
200.4	155.387	146.185	139.881	8.978	-162.588		-0.368	103.852		6.839	22.455	141.219	34.114	-63.76	93.928	-55.916	185.598	67.261	106.75	47.422	3.735	-222.603
200.533	175.855	122.333	101.376	3.622	-113.567		-5.193	199.967		25.886	50.578	-124.103	-2.774	-111.148	-93.999	-37.103	-33.834	76.119	129.117	20.757	-12.208	-218.614
200.667	118.901	90.093	101.896	10.637	-126.356		4.213	86.321		8.796	19.44	-4.958	-17.412	32.535	99.727	-38.319	391.441	92.574	150.763	23.498	1.27	77.845
200.8	93.353	169.073	78.836	16.582	-139.703		-113.077	91.603		2.179	-102.764	15.94	11.894	-129.895	-80.41	10.967	308.263	124.401	158.023	35.46	-14.911	-30.027
200.933	131.89	162.142	50.08	9.268	-201.434		114.381	159.173		0.937	5.239	53.971	-29.137	-225.847	13.204	-11.683	211.721	108.349	165.353	42.787	-38.378	-22.189
201.067	63.655	99.782	20.872	-12.546	-119.33		-112.934	90.681		-32.131	118.384	31.694	25.369	-129.522	-3.262	-7.233	188.378	59.567	44.026	102.759	-19.987	112.194
201.2	174.176	116.99	17.117	11.847	-83.949		1.387	38.4		-10.167	7.87	28.184	28.384	-86.453	-5.46	3.119	45.173	64.469	145.212	220.227	58.604	175.029
201.333	178.359	253.6	77.949	-119.991	-15.758		4.734	113.053		-22.125	-55.416	104.346	11.537	-123.403	16.298	64.161	331.144	134.744	129.173	92.02	-56.241	191.89
201.467	117.408	72.261	46.187	103.801	-47.733		115.969	25.513		26.254	-114.559	43.428	7.143	76.106	28.815	57.168	200.697	40.751	267.587	201.085	64.188	124.449
201.6	240.182	123.111	23.594	23.921	-19.941		8.386	39.167		-10.713	-54.584	22.703	3.047	-87.587	-28.416	43.123	23.563	89.474	117.539	68.749	-5.213	118.693
201.733	99.551	127.378	3.725	3.759	2.894		10.519	133.031		11.208	-215.998	27.943	-35.046	23.182	-35.155	8.317	317.936	136.266	17.666	97.064	2.27	165.224
201.867	109.019	152.677	16.874	5.742	26.169		3.351	-21.57		56.62	-239.709	8.858	12.894	72.219	-119.278	36.463	156.858	119.596	235.3	63.28	-14.921	88.969
202	123.08	142.54	-22.856	-21.284	33.89		115.157	97.311		20.393	-140.211	23.301	14.373	154.073	-50.793	7.894	66.625	101.031	133.298	107.228	-3.048	101.894
202.133	111.757	138.509	42.276	2.387	-7.449		12.862	76.78		-8.744	-143.718	57.389	-17.643	60.662	-130.828	27.44	146.669	26.01	20.622	80.695	-15.313	94.994
202.267	176.182	134.539	71.074	-16.814	-6.968		10.789	79.12		81.885	-171.237	36.857	4.096	134.777	-168.013	-82.192	237.795	100.112	53.2	112.228	5.047	75.73
202.4	119.922	127.052	53.919	31.244	50.85		6.834	76.885		35.226	-145.276	50.03	-13.118	155.13	-225.383	-155.093	-33.215	141.736	61.124	115.582	-23.418	82.901
202.533	108.255	123.135	99.306	34.863	200.896		1.736	49.033		16.388	-102.527	52.329	9.265	165.889	-147.135	-102.241	118.257	101.881	28.205	-51.421	5.306	125.6
202.667	129.982	125.122	17.033	-16.819	-19.01		-114.451	109.742		-22.151	-145.322	32.848	12.575	116.786	-275.036	-94.925	131.797	75.484	76.325	147.587	-19.666	200.927
202.8	107.065	176.926	-5.488	-31.686	55.412		117.467	93.191		56.52	40.914	7.454	-29.226	52.191	-90.269	-94.693	142.545	83.471	-106.025	42.737	-8.304	133.16
202.933	109.738	140.997	74.573	-1.99	15.782		4.554	74.035		12.467	23.695	11.791	-79.39	39.012	-191.066	-74.056	168.931	49.554	189.247	-39.907	-110.242	260.107
203.067	93.4	143.848	117.753	4.656	15.324		15.401	50.902		8.921	-8.213	-15.436	-4.679	45.41	-153.238	77.607	60.067	70.663	-27.457	49.832	72.889	-23.341
203.2	89.243	130.261	118.89	-13.999	-65.213		11.943	32.726		3.245	6.418	-46.47	19.76	48.694	-114.552	-17.065	141.205	10.298	262.379	-73.254	-3.688	208.727
203.333	100.335	123.464	108.935	6.63	33.525		346.767	20.881		30.984	-9.004	-85.268	207.729	42.569	-118.864	24.302	179.959	31.318	63.584	210.555	-17.357	56.853
203.467	6.345	124.827	72.025	44.044	6.871		230.987	94.38	43.298	-12.784	14.802	-185.274	52.339	116.812	-81.275	30.382	122.59	45.385	219.133	48.377	80.148	35.003
203.6	253.501	109.746	60.777	21.872	38.336		-29.166	65.391	-118.173	24.065	-13.875	85.617	36.149	45.607	-333.702	49.984	190.663	59.269	85.857	114.882	30.583	109.793
203.733	95.77	127.618	28.6	18.802	75.054		-137.25	70.551	20.081	-16.96	-13.591	-71.125	59.516	63.517	-59.329	15.56	183.764	40.331	57.312	70.124	9.627	193.803
203.867	14.638	143.361	81.167	32.394	155.131		168.751	55.787	47.829	8.841	-21.413	-112.269	49.651	62.967	-56.994	-88.2	78.855	79.993	17.414	107.091	-28.259	96.94
204	113.336	256.746	72.69	-30.6	-11.879		48.439	222.982	35.654	-23.081	-7.291	-166.578	142.079	52.01	-287.039	109.231	150.309	137.047	7.018	110.371	-122.826	108.238
204.133	77.19	11.884	77.123	38.596	77.998		4.893	39.539	85.186	20.729	51.028	-108.739	49.798	94.463	183.183	30.538	340.278	-50.525	-18.241	84.756	70.931	95.236
204.267	95.689	121.118	101.656	-19.3	71.938		20.559	63.717	70.934	-11.57	-10.437	-81.263	133.282	21.15	-61.17	-2.125	49.923	-21.241	-60.259	46.366	-58.479	139.247
204.4	85.015	81.292	19.135	29.917	28.673		-5.635	22.286	79.612	18.734	-3.688	-253.55	135.983	29.75	-54.649	10.588		28.997	-37.074	96.903	-38.329	33.922
204.533	55.58	82.178	179.826	-2.013	8.248		-33.917	170.293	85.531	10.276	4.771	-35.269	107.865	-11.949	-64.98	14.541		40.295	82.703	87.919	-31.911	206.467
204.667	104.53	122.696	79.973	-20.155	5.592		87.757	57.129	24.941	-18.501	18.155	-44.613	139.115	-13.736	-108.959	-4.909		63.32	24.89	124.037	-29.978	103.699
204.8	112.021	97.544	96.485	8.008	-5.33		77.218	42.239	52.13	-12.454	-15.985	49.056	123.538	25.137	-103.077	25.724		88.541	14.389	122.579	-16.606	70.186
204.933	104.694	2.472	81.763	-4.899	-74.599		30.636	20.81	57.545	15.748	-7.253	-47.499	85.991	12.351	-59.216	37.034		3.59	86.928	80.322	-7.542	-48.746
205.067	129.877	54.737	81.704	-27.291	-2.679		36.164	45.272	6.788	2.191	35.879	-39.291	180.202	47.052	-110.188	-16.255		20.981	47.569	101.053	-26.128	80.1
205.2	129.795	17.784	198.834	27.498	-3.727		14.305	-15.726	22.336	-2.775	48.82	-66.288	117.858	-6.208	-95.825	12.047		-7.582	-2.603	28.164	14.914	76.182
205.333	133.666	124.187	22.539	-56.756	-20.953		49.644	-83.329	110.922	7.845	-9.896	-28.96	37.099	37.703	-133.181	16.252		22.387	12.469	50.652	-119.318	56.755
205.467	105.561	-113.937	73.196	67.454	52.05		9.746	4.878	-8.767	-30.078	159.981	-58.97	224.303	-73.507	33.725	29.602		-316.595	5.649	59.57	71.786	160.763
205.6	151.1	88.793	-34.859	-7.681	41.237		18.425	69.594	34.55	-12.796	53.569	-13.083	52.947	44.255	-9.806	-21.914		-253.061	24.93	48.537	8.744	70.312
205.733	149.654	78.813	27.665	-2.528	55.976		-10.037	41.362	8.15	-15.219	72.339	-34.222	83.059	80.229	38.516	29.465		-127.061	16.37	72.905	-100.4	7.961
205.867	103.942	109.177	60.634	34.095	161.61		9.668	41.148	43.181	-54.295	28.042	6.408	71.38	79.748	136.609	-11.737		-155.328	-1.341	59.319	86.284	26.591
206	229.158	127.476	145.528	5.538	-33.943		-7.833	13.325	32.342	-118.571	83.066	-40.188	116.602	142.288	109.898	-6.308		-153.193	6.608	120.351	-20.91	7.62
206.133	-19.584	126.175	27.429	2.052	134.997		3.801	72.538	49.247	-142.961	40.44	-87.538	7.411	-5.974	83.091	-2.948		-141.413	12.227	96.075	40.74	-49.338
206.267	154.121	85.181	-48.008	4.387	3.128		12.853	73.781	14.638	-126.836	11.961	186.471	45.28	18.942	-13.879	8.188		-124.982	33.899	218.656	25.658	208.777
206.4	80.018	122.893	-3.035	-3.995	-28.675		14.657	116.306	12.369	-125.818	53.122	23.423	7.733	-45.117	-28.874	-0.484		-107.67	-24.685	-14.168	14.924	14.864
206.533	5.832	71.565	34.08	-6.669	21.842		16.297	66.881	24.739	-132.796	53.001	50.742	31.142	79.319	175.982	6.899		-24.162	-2.576	155.62	-20.459	66.228
206.667	92.553	246.887	-18.679	18.081	14.959		34.903	82.46	-31.086	-130.773	-20.837	84.174	138.687	53.104	73.088	20.703		10.334	-8.363	-122.065	-15.761	44.017
206.8	19.343	-75.13	14.048	17.494	37.673		-4.965	68.958	-17.801	-89.246	113.751	100.609	-60.889	29.831	72.205	-7.019		-168.713	-25.681	222.894	34.812	21.327
206.933	75.08	125.807	-14.28	3.909	30.532		-9.386	147.822	-12.87	-77.597	35.349	64.532	43.794	-14.575	145.695	11.839		-38.193	3.534	-68.435	34.973	22.613
207.067	15.859	96.348	39.49	3.177	130.258		23.78	26.107	2.266	-45.115	48.465	29.28	56.792	-14.162	22.449	-2.949		-25.508	-37.441	39.38	88.73	76.125
207.2	57.966	113.768	-29.638	39.122	33.194		-18.573	18.809	6.641	-15.345	21.402	73.201	33.392	-16.079	23	7.119		-33.809	-39.392	115.815	8.682	1.546
207.333	12.411	79.89	-25.28	15.737	76.644		-15.584	-60.144	-6.432	-27.004	49.828	44.238	15.915	-8.066	6.423	-6.389		-125.834	-24.086	-88.914	7.8	19.865
207.467	1.999	150.108	36.718	4.948	101.255		-17.828	55.63	9.375	-9.546	47.032	51.483	6.478	22.284	19.683	13.265		-92.823	26.947	13.702	19.838	-5.837
207.6	2.684	73.547	-23.529	16.106	94.83		-27.891	8.132	20.387	34.159	12.117	55.071	-5.01	52.77	-7.516	-25.723		-106.655	-113.32	-1.718	44.297	99.032
207.733	1.384	130.516	-7.414	8.224	31.51		-11.149	14.195	10.421	14.162	26.582	-11.095	-34.32	81.78	30.013	15.256		-110.377	-58.813	4.963	-41.939	32.423
207.867	0.812	66.639	82.199	-5.581	76.313		22.612	13.215	1.712	20.813	17.808	34.996	-60.798	93.726	-13.118	-24.14		-98.288	-68.616	-2.6	29.209	-97.965
208	-23.777	247.566	16.768	-30.242	-119.432		10.857	35.698	-13.177	20.255	-7.57	28.42	32.852	91.431	-285.322	31.223		134.889	-142.893	-120.176	14.323	-12.385
208.133	114.19	-64.564	42.241	10.589	297.747		1.855	31.878	-10.287	11.847	122.785	0.988	56.011	106.851	172.262	9.889		-91.408	-245.987	103.584	3.141	38.42
208.267	-12.122	102.491	122.75	-1.973	71.203		3.668	35.646	-2.977	30.713	28.611	58.207	-6.454	-36.479	14.698	-9.923		197.411	-233.616	-14.329	-24.95	44.341
208.4	-15.175	61.02	62.091	-0.946	78.86		14.542	56.067	9.89	53.768	63.987	55.672	14.192	145.114	52.92	25.144		158.538	-242.782	-8.288	18.319	84.81
208.533	-120.762	134.679	87.428	25.073	58.854		9.644	28.51	-16.354	33.052	-15.806	25.919	55.978	89.694	85.145	14.575		160.618	-219.112	1.875	30.614	115.776
208.667	17.369	122.668	182.173	16.05	35.417		-15.257	53.377	-7.128	39.023	89.411	87.034	43.838	96.684	29.516	-8.724		186.292	-156.266	-13.107	7.308	131.713
208.8	11.795	116.248	86.686	20.902	15.038		13.53	35.484	-34.375	26.485	37.453	-8.371	29.965	76.907	-14.04	17.916		139.009	-339.643	-21.463	-11.942	87.892
208.933	7.179	115.297	100.406	-7.697	36.86		-12.774	-8.698	-5.772	9.811	34.033	-119.837	92.854	59.768	143.479	2.389		147.993	-173.599	-24.351	-35.164	128.435
209.067	8.968	119.174	138.842	6.547	42.03		-29.276	61.738	23.456	64.11	110.063	167.086	19.871	62.646	38.34	38.046		167.365	-194.374	-24.919	132.416	106.746
209.2	46.783	65.953	150.163	-6.975	-8.526		-6.301	50.539	30.658	24.891	50.03	2.731	4.439	65.836	-165.01	13.139		164.528	-162.179	-4.871	91.134	42.211
209.333	32.156	255.695	173.036	2.629	-121.499		-73.213	165.127	38.34	63.175	-11.566	32.234	6.371	76.201	17.044	-42.947		199.516	-59.817	-118.374	23.888	52.558
209.467	14.832	-30.983	152.027	-30.873	63.417		-73.778	74.5	27.464	47.622	84.595	-123.967	30.806	56.851	171.653	12.969		124.695	-27.013	-171.839	175.803	17.442
209.6	71.04	63.563	110.394	26.444	107.63		47.007	45.818	19.614	50.246	50.409	43.278	0.908	67.354	-145.633	20.402		184.797	35.418	-115.665	29.53	57.353
209.733	57.626	65.65	127.687	2.786	-105.472		-122.898	72.619	26.638	82.648	37.76	118.907	5.104	90.834	-9.564	126.999		135.768	15.067	-187.645	109.429	31.035
209.867	58.583	83.042	160.537	-3.536	88.638		-16.107	100.588	41.94	19.812	50.271	24.828	19.359	120.587	-101.8	-14.646		122.911	24.254	-191.612	-66.315	54.722
210	38.034	26.829	137.079	9.263	8.173		22.529	86.995	13.152	31.817	80.521	54.895	7.691	51.469	-85.272	-14.731		133.498	28.903	-249.654	-7.386	-37.824
210.133	40.983	8.488	154.662	-7.396	-10.556		-10.097	69.941	19.675	33.651	29.572	30.673	-0.922	84.923	-87.242	0.957		129.079	30.934	-241.177	153.503	84.218
210.267	40.832	10.8	137.869	15.328	24.858		184.87	178.854	-4.564	5.091	41.68	36.237	14.814	224.6	-114.541	78.487		257.364	45.191	-149.627	159.735	43.786
210.4	107.844	291.432	133.992	-0.935	120.58		359.794	230.903	38.154	47.532	158.209	32.826	234.476	273.102	-59.817	50.332		507.436	415.774	-65.946	153.252	41.197
210.533	362.216	493.442	204.34	-12.996	338.323		318.491	305.566	72.664	126.795	181.241	40.801	312.222	467.083	-23.081	250.647		216.598	318.082	43.048	130.891	106.833
210.667	284.226	477.62	343.584	22.459	235.291		306.681	331.83	9.279	169.085	178.721	27.922	276.48	375.118	-43.137	-28.216		241.422	245.427	346.065	119.978	163.063
210.8	339.676	229.488	303.518	5.922	383.051		364.364	228.683	-2.643	138.488	168.737	55.868	224.624	266.942	304.74	213.413		200.37	237.278	333.964	184.705	130.967
210.933	342.313	206.119	382.341	18.454	225.215		286.475	227.479	22.42	165.101	155.004	91.796	292.617	273.034	550.153	101.198		157.925	230.174	167.263	148.52	224.454
211.067	308.794	261.916	353.315	3.885	161.422		366.802	127.893	57.094	115.488	155.865	113.13	289.663	199.951	254.518	183.118		177.4	257.574	123.584	149.153	81.505
211.2	404.498	244.879	314.958	17.735	144.872		292.838	216.895	56.051	89.3	151.634	39.036	159.555	118.961	210.131	138.82		172.183	240.56	193.648	28.845	84.153
211.333	284.315	194.819	210.914	-8.184	144.326		246.802	178.595	72.076	100.685	118.769	164.342	171.916	113.116	186.016	77.618		192.957	171.262	158.477	136.146	17.603
211.467	271.26	156.564	208.593	29.453	154.137		162.742	159.56	40.188	112.931	59.735	40.78	209.01	75.836	93.811	110.773		285.992	232.408	157.685	121.319	147.282
211.6	286.967	228.552	172.964	8.702	78.84		61.341	122.422	52.22	47.403	49.126	35.612	212.066	122.197	69.606	67.945		323.399	175.601	40.972	213.104	121.734
211.733	272.55	170.021	156.98	11.146	33.281		97.592	127.194	-2.165	25.209	37.578	68.975	160.907	127.326	86.372	105.024		240.837	74.586	23.586	67.604	98.935
211.867	324.965	95.371	75.219	-4.149	2.645		170.13	132.118	-2.904	6.056	65.521	23.674	225.747	93.608	87.573	77.367		194.581	162.333	7.051	34.645	91.214
212	230.91	113.65	78.987	12.763	17.869		184.666	63.182	135.025	22.249	133.799	289.738	273.55	87.447	-2.281	87.507		569.349	135.134	127.403	22.786	127.976
212.133	118.937	136.396	54.599	-7.427	9.363		110.016	44.463	-116.5	34.923	-104.665	-158.955	146.514	42.466	137.125	77.545		272.938	240.134	22.872	47.771	95.135
212.267	158.47	117.819	62.614	5.735	9.296		89.029	93.033	-6.174	17.668	-14.781	36.044	137.583	84.273	16.248	57.097		272.667	219.072	60.326	5.42	145.755
212.4	229.289	94.915	53.845	11.49	-10.716		86.218	45.911	6.161	9.41	1.349	58.335	123.639	91.105	22.275	32.58		190.021	169.692	97.722	7.191	88.315
212.533	248.949	114.291	77.603	-9.627	13.223		83.112	33.762	59.558	-5.27	12.981	75.246	244.383	105.087	-11.577	84.177		155.834	180.978	47.741	-4.336	117.34
212.667	201.012	81.012	111.453	-12.838	-1.205		81.754	80.113	12.065	-31.293	-17.213	32.926	246.51	113.671	19.518	20.982		224.217	179.632	106.235	-97.912	72.538
212.8	247.056	69.219	95.496	-8.286	-0.867		38.911	73.303	18.333	21.8	19.521	50.685	194.337	43.427	-6.944	93.55		177.679	164.779	65.969	144.155	78.575
212.933	142.466	43.536	72.198	-30.973	2.813		95.459	69.995	22.566	21.093	-42.421	41.051	134.472	-22.808	26.16	80.531		228.453	167.604	133.027	19.847	78.355
213.067	182.554	57.019	86.018	10.969	3.705	8.991	30.262	19.885	38.22	9.204	-35.467	204.31	219.753	56.581	26.875	73.966		140.555	160.036	224.992	3.269	162.595
213.2	132.807	108.834	41.169	6.815	-5.699	-8.368	62.242	31.076	5.456	10.251	-18.192	-27.953	200.23	53.751	23.067	28.599		-131.087	209.353	-19.034	27.705	-56.371
213.333	164.164	123.107	52.318	-7.682	-16.346	-4.829	38.203	28.842	-22.523	-61.342	20.005	147.051	282.545	-26.101	-21.735	72.405		-169.209	220.616	124.815	-124.417	198.721
213.467	121.165	75.983	70.995	24.943	5.98	114.179	7.652	9.125	-30.081	59.908	-29.625	-84.784	63.916	89.866	35.868	26.854		65.608	217.348	41.19	50.549	24.863
213.6	153.985	128.826	60.64	25.597	-20.611	228.139	-0.997	33.645	-15.678	-1.948	-35.777	46.677	162.391	20.241	-34.365	45.201		21.641	217.234	14.053	55.06	126.848
213.733	154.265	115.988	93.333	14.259	-13.071	4.035	11.627	-19.613	13.555	-10.036	-48.823	48.588	238.295	-12.225	13.954	26.434		28.213	205.419	63.387	88.468	122.527
213.867	142.527	132.199	109.57	-18.87	9.744	114.371	-10.033	77.392	9.12	-2.448	-30.587	3.363	199.179	28.994	50.179	53.994		-13.935	173.362	16.131	239.813	95.829
214	114.724	75.091	71.494	41.619	-17.367	341.996	10.91	-14.762	-24.644	13.294	-5.89	7.427	194.155	-36.072	-13.935	89.086		-26.99	235.333	128.553	92.346	85.218
214.133	78.564	28.755	104.185	-2.715	-14.609	114.033	24.418	-18.851	57.519	10.893	-21.758	51.661	246.843	59.613	52.966	175.56		-116.638	188.377	61.333	81.057	111.937
214.267	126.378	-6.488	84.953	-3.681	-18	227.388	17.975	11.283	-15.372	3.811	-32.44	-2.176	188.636	45.696	49.781	68.444		-490.331	150.062	1.63	63.841	134.412
214.4	135.262	1.651	129.055	-5.586	5.643	146.353	53.694	38.207	16.48	-9.224	-4.179	84.639	193.964	472.393	38.574	49.182		-469.885	238.566	40.993	76.539	129.356
214.533	178.989	3.792	94.554	-19.985	5.377	51.331	69.674	11.12	-14.677	-5.978	-17.501	37.985	176.363	80.88	12.675	35.571		-245.466	180.567	29.805	39.069	45.431
214.667	145.925	30.373	116.847	11.869	-29.677	13.284	47.678	34.252	128.438	12.238	-27.095	34.323	222.36	77.706	-138.611	-80.262		-133.859	182.415	-125.258	76.909	95.194
214.8	141.172	-8.277	96.728	1.411	-4.357	-18.195	12.967	64.244	-124.348	-15.418	30.586	78.011	153.643	32.567	162.865	175.719		-324.703	208.119	92.206	67.589	92.3
214.933	145.451	24.051	129.963	8.254	-11.15	-7.029	35.314	-30.06	37.852	-36.187	15.074	22.007	154.65	78.13	33.025	91.902		-114.822	213.091	8.056	-14.571	67.917
215.067	128.385	41.027	142.053	-1.125	-26.971	57.526	34.061	-8.365	-11.805	-33.268	-2.863	3.333	211.494	26.893	11.979	120.297		-145.007	144.318	-9.395	32.345	103.933
215.2	165.647	-6.373	125.66	5.764	-12.851	37.04	19.855	96.498	48.994	-21.852	16.257	153.412	163.659	17.419	88.139	130.232		-134.17	143.881	33.129	6.836	112.671
215.333	173.236	139.3	95.26	8.773	2.812	27.523	50.144	147.471	351.864	-35.245	-42.486	-40.359	145.454	-10.51	95.436	95.116		-181.245	186.645	4.107	-24.97	146.01
215.467	132.838	-29.546	110.003	5.331	-24.73	36.294	17.824	227.559	10.189	-11.846	6.75	46.7	107.926	21.495	41.63	112.425		-154.639	107.883	97.907	29.738	129.95
215.6	178.901	38.822	93.237	5.439	-6.508	54.411	5.094	-96.285	24.239	-15.789	34.861	57.706	101.368	-10.403	71.555	131.79		16.923	126.875	-91.57	7.051	80.644
215.733	144.918	21.194	70.107	-2.28	-25.687	30.323	8.146	135.564	29.651	24.384	30.934	65.948	147.335	12.368	96.076	126.453		-24.7	178.303	4.64	-13.528	324.69
215.867	151.583	6.792	48.323	-3.667	17.218	42.806	3.772	5.201	-23.811	20.173	25.797	-31.001	3.221	-22.29	75.428	107.036		-48.671	162.184	2.327	-1.21	14.976
216	171.293	250.718	21.756	-3.529	-10.611	44.065	114.231	40.918	43.649	40.82	22.636	184.829	101.57	47.519	-143.709	81.029		-19.038	84.101	-125.938	34.101	133.651
216.133	134.46	-218.731	30.75	-8.757	-6.204	186.867	-107.688	32.604	61.027	211.003	27.173	63.889	382.837	20.207	215.589	101.366		-179.769	126.34	125.003	-12.869	-107.351
216.267	28.17	20.866	93.726	-5.508	8.177	57.03	-6.88	-6.963	65.72	42.844	25.329	-83.925	275.998	-10.836	-41.66	79.713		-18.464	197.604	11.55	-4.154	-17.517
216.4	149.19	88.889	110.914	-19.122	17.04	47.029	7.716	-74.693	47.035	-16.851	-6.316	201.139	19.758	23.009	150.684	19.622		119.23	160.453	22.831	6.335	25.287
216.533	172.378	109.831	72.991	6.148	-10.604	61.925	1.512	-7.361	49.26	13.792	6.04	15.66	199.28	40.161	30.26	72.705		159.514	198.877	247.327	6.504	42.267
216.667	256.644	146.345	14.42	-7.528	9.526	45.898	11.818	20.443	90.439	-16.987	97.342	72.336	162.493	52.537	5.45	63.067		62.305	166.521	163.238	-4.29	-18.397
216.8	142.63	80.749	89.563	17.356	5.729	60.026	-5.997	-20.681	132.591	-3.08	9.443	22.307	164.256	89.427	23.283	68.697		190.393	76.148	54.505	-6.352	7.208
216.933	139.051	59.24	109.687	-7.157	-3.674	155.045	35.444	-4.701	124.695	50.003	28.223	14.186	148.54	181.836	20.693	52.459		290.569	77.37	159.413	-31.483	12.313
217.067	208.482	85.841	106.273	53.343	-38.54	95.876	17.433	37.554	230.485	16.485	47.465	51.426	177.741	108.911	-39.12	-73.81		290.452	68.499	105.543	-4.055	-23.491
217.2	160.463	46.483	72.443	9.425	-56.301	70.398	13.667	-9.136	6.499	-272.792	12.795	55.03	135.463	98.47	140.545	78.165		200.632	126.683	127.079	-57.594	36.373
217.333	127.443	29.033	124.501	-9.369	-135.997	82.421	20.285	-44.251	115.973	136.16	-11.845	26.407	289.467	77.427	36.732	56.704		270.988	73.385	124.911	-51.479	9.873
217.467	136.51	73.442	77.698	2.776	-111.6	73.333	-18.035	55.8	-1.218	-137.525	-21.016	52.055	-8.883	65.192	62.772	60.954		212.944	94.424	90.562	-128.819	59.619
217.6	115.401	28.562	119.572	-6.803	-111.593	71.557	26.606	34.211	116.106	13.829	30.465	-65.175	53.479	46.567	114.535	44.72		175.057	90.784	57.488	128.671	31.368
217.733	34.243	-8.672	117.868	-17.006	-112.457	24.163	2.048	194.743	9.525	-137.856	11.822	22.286	107.043	25.868	-26.224	3.953		199.146	132.907	95.354	-35.527	47.176
217.867	50.866	86.149	71.935	-7.289	-51.245	34.269	12.019	75.647	2.114	9.341	20.822	35.698	81.893	12.567	135.27	144.628		141.924	30.167	96.858	-171.967	43.133
218	83.022	4.292	99.85	-64.802	-13.048	37.334	-13.254	100.052	232.229	23.668	19.947	85.002	-15.341	1.656	42.946	-8.199		121.589	77.604	77.7	-198.252	79.646
218.133	100.383	49.535	125.527	92.152	3.009	-70.84	17.996	71.473	116.111	-2.815	-11.565	221.163	15.716	26.18	30.134	-131.981		145.483	27.911	85.86	-117.347	57.83
218.267	175.425	52.702	108.567	-20.406	-13.462	-169.139	-2.073	79.669	-116.204	9.993	-9.934	40.105	21.826	-8.678	17.205	7.277		108.189	-4.955	56.477	-135.486	66.85
218.4	172.215	54.075	127.525	3.269	-18.135	-180.628	-3.016	100.825	116.317	-13.899	13.87	26.55	15.372	12.64	-51.686	-8.395		209.963	9.08	134.255	-157.121	-12.618
218.533	112.086	22.619	128.865	-5.222	-20.311	-255.896	40.444	79.699	116.32	-8.988	4.394	37.949	12.469	18.663	152.411	-7.392		91.348	16.081	89.112	-287.519	5.973
218.667	130.718	168.807	121.239	-5.938	-15.453	-213.898	25.002	32.084	6.747	-8.589	43.475	-80.38	5.279	8.925	-138.386	-23.998		88.35	-4.495	126.314	-125.24	65.644
218.8	27.583	83.912	127.826	18.958	78.58	-264.878	40.116	54.934	116.733	-4.86	49.903	48.829	-1.7	-4.427	111.174	14.743		19.46	15.159	-74.839	-51.138	9.027
218.933	145.463	9.612	87.514	5.412	96.989	-253.065	22.546	61.896	1.412	0.607	17.209	4.793	25.516	-4.443	151.474	23.3		-6.145	2.094	18.986	-163.719	14.453
219.067	119.169	7.028	105.928	9.68	51.913	-295.524	47.46	54.729	-0.853	36.401	-15.682	75.085	3.977	4.685	-66.262	157.874		26.934	-3.041	23.788	-150.756	37.813
219.2	281.934	16.812	100.721	-1.334	40.264	-298.536	-4.317	52.755	116.589	0.287	12.281	60.66	6.944	4.982	36.215	14.418		143.578	6.157	-14.373	-92.365
219.333	119.02	23.208	65.534	12.741	34.291	-272.167	-9.338	47.745	-2.053	20.279	67.965	82.301	12.734	18.787	47.079	-108.421	35.415	265.973	12.555	43.971	-104.847
219.467	66.354	1.471	21.124	-37.426	15.188	-234.705	-13.986	18.972	-117.006	-9.309	50.036	59.431	-5.701	-48.78	108.352	-3.566	-233.352	184.784	-10.503	14.044	-120.048
219.6	88.252	-5.155	34.909	-7.048	45.979	-221.737	-16.692	-15.378	-353.022	135.955	61.629	30.224	2.889	-127.586	14.434	-4.245	-347.549	158.802	44.385	82.755	-97.316
219.733	47.123	-26.544	17.862	-12.957	50.013	-215.374	-22.208	0.995	-28.888	-136.206	34.839	147.463	18.108	-192.929	-2.795	-3.581	-188.736	179.614	51.384	119.06	-63.272
219.867	47.274	-39.062	13.936	12.586	60.126	-160.434	8.439	21.029	-119.105	-7.594	94.559	45.881	17.658	-114.666	40.845	4.716	-415.937	146.358	78.525	110.384	18.439
220	41.268	-17.833	14.218	12.025	54.269	-145.306	8.473	61.535	-7.299	135.201	-20.27	38.318	-3.438	-103.503	-139.694	-13.097	-308.315	267.038	106.179	126.219	34.696
220.133	11.085	-20.909	99.168	2.713	57.801	-217.796	13.337	53.752	14.005	-137.806	49.305	33.879	-31.857	-189.858	148.14	2.701	-45.621	164.463	49.84	108.898	-10.187
220.267	-3.821	81.332	-1.852	-24.176	38.688	-165.23	8.792	30.48	116.393	4.078	44.803	31.704	2.344	-139.48	-10.954	7.187	-170.506	197.86	30.515	109.11	-23.058
220.4	41.497	-4.382	10.222	4.392	52.729	-239.858	31.331	5.285	116.18	2.463	9.873	19.053	13.743	-60.341	-35.578	11.568	-101.057	227.01	84.329	64	44.689
220.533	-37.684	41.132	26.324	-0.64	-9.015	-78.49	19.083	41.822	117.038	135.706	-18.775	61.633	-7.814	-59.585	-114.178	-18.456	27.429	168.712	47.793	54.883	146.593
220.667	13.302	-14.286	33.545	5.062	43.777	-53.888	-16.429	44.19	117.588	-136.805	49.538	21.781	-4.243	2.795	14.859	-7.049	0.431	115.994	21.1	19.758	15.372
220.8	-29.299	-7.653	22.192	14.014	52.033	75.019	-4.941	-44.92	234.815	28.359	7.715	49.078	124.99	3.663	56.502	34.642	-12.937	142.124	95.892	87.723	75.532
220.933	-35.825	57.25	18.363	6.825	30.006	140.261	7.064	73.882	118.713	-25.017	80.641	49.69	21.694	-37.841	7.07	24.894	-202.101	195.064	106.875	128.237	25.646
221.067	-21.569	81.941	-11.002	-4.684	82.911	200.451	-19.014	30.473	118.69	1.569	21.983	71.515	18.059	-3.424	16.818	-4.279	311.36	116.767	130.729	72.543	-14.886
221.2	-24.83	239.248	-13.104	-40.205	113.55	183.457	6.357	58.295	121.885	1.476	126.229	100.155	63.621	-54.33	-19.766	2.426	62.289	113.615	176.312	76.496	54.103
221.333	-48.592	62.596	21.983	19.266	169.809	89.421	-13.662	39.122	8.784	136.441	144.435	36.122	137.632	-20.31	-139.456	35.483	86.594	275.094	141.72	126.441	-55.717
221.467	-70.763	82.169	14.325	-0.451	107.744	165.927	2.114	67.632	119.384	-0.165	-25.866	113.27	-14.747	-77.292	192.938	2.346	105.533	-50.586	165.684	-36.114	30.438
221.6	-63.121	33.152	-7.146	-7.331	145.058	177.869	3.447	47.477	117.026	7.294	41.875	85.683	54.67	-125.023	111.071	35.113	78.308	289.231	141.721	9.479	-6.44
221.733	-125.922	19.001	15.335	3.891	130.994	196.467	-7.563	31.238	-3.27	-10.209	103.596	45.303	105.828	-107.615	-38.402	27.244	91.676	100.974	61.023	17.525	-27.662
221.867	-14.047	14.487	3.897	14.44	115.523	147.052	25.789	8.992	115.8	4.104	68.915	97.77	94.043	-84.659	129.196	13.379	191.407	88.01	18.372	61.834	29.087
222	-65.15	25.537	-3.156	14.95	94.72	128.605	52.749	15.471	-116.234	44.473	48.563	37.023	98.746	-55.654	33.667	70.03	98.061	97.975	45.576	1.486	-29.824
222.133	0.76	-29.508	-5.787	-12.113	84.034	206.169	29.345	-12.576	115.984	134.247	45.731	-84.168	125.704	-76.458	2.774	70.174	111.143	80.347	68.56	40.376	43.234
222.267	-12.143	25.222	4.068	-6.828	94.315	138.985	71.909	29.751	-12.024	-2.455	81.498	182.496	121.15	-51.391	-9.899	66.864	116.803	24.532	83.472	49.007	26.232
222.4	-57.994	-11.374	-8.171	25.095	53.856	127.971	17.798	52.999	10.062	-9.146	42.702	-72.383	115.196	13.496	-60.77	23.89	130.006	-17.367	78.035	29.232	89.981
222.533	-43.474	18.108	-2.19	2.113	44.027	124.233	47.935	15.574	-0.582	-2.459	55.921	154.356	-4.736	-0.872	29.245	47.743	120.094	29.937	81.961	30.353	42.781
222.667	-29.701	50.03	-31.794	-8.642	31.392	127.199	34.476	24.517	-8.572	134.903	67.665	-20.464	15.187	5.804	-137.437	11.795	-37.283	138.605	72.805	-6.623	12.039
222.8	-93.285	6.068	-12.784	-11.608	36.351	127.589	55.139	65.892	0.704	-7.159	114.306	21.877	45.219	6.273	230.269	33.668	-32.193	-140.341	169.324	13.544	59.503
222.933	-64.521	10.444	17.442	-7.33	12.066	141.358	34.506	41.705	116.179	-9.657	14.206	9.445	-10.948	21.233	143.439	17.83	29.603	4.78	65.596	96.232	47.418
223.067	-49.521	23.304	-10.974	17.935	11.477	197.019	42.724	30.376	-16.747	135.034	30.875	6.282	16.677	30.988	56.153	21.95	-65.419	-4.638	90.205	55.275	31.755
223.2	-59.432	10.064	-19.833	11.376	8.308	161.069	56.644	24.159	114.878	-135.451	72.722	2.01	-12.921	18.179	38.495	9.775	23.166	-39.237	104.03	71.078	13.313
223.333	55.148	33.418	-1.117	-35.36	36.827	111.037	-11.202	62.291	0.164	135.201	103.006	18.184	-4.722	47.266	27.52	12.719	29.059	-42.107	118.806	64.044	-15.04
223.467	46.772	10.808	-5.013	-4.49	-29.166	113.035	7.375	34.732	116.745	-6.358	115.414	-29.357	-12.147	49.828	60.398	15.694	-48.082	-156.17	74.256	62.947	-10.19
223.6	122.796	-11.893	-6.479	2.936	21.902	62.461	41.917	22.63		269.98	107.597	33.055	152.723	127.818	73.726	-22.942	41.1	-86.881	107.569	16.71	21.215
223.733	116.698	4.898	21.201	27.64	12.446	49.655	-35.568	60.917		40.371	55.676	-14.385	116.333	110.784	106.144	-6.42	82.445	-337.795	63.085	35.553	-9.155
223.867	36.899	20.889	22.868	-33.779	15.057	35.94	20.471	63.708		-3.783	79.937	28.837	91.553	76.48	82.144	-10.291	88.01	-333.253	63.913	116.544	5.142
224	93.645	5.761	34.007	58.912	20.642	51.542	7.874	54.323		5.331	32.891	5.23	136.584	41.029	-12.332	6.886	-23.252	-137.341	109.323	7.16	29.786
224.133	10.25	9.761	-27.637	-6.282	48.647	-35.431	-12.556	87.443		-130.698	86.541	45.748	35.352	54.262	147.722	17.595	-4.522	-335.475	91.103	-28.939	-8.371
224.267	233.899	64.606	-26.958	5.984	70.135	-8.898	10.934	63.358		-1.666	69.05	-127.644	62.386	36.636	73.138	14.392	-124.383	-166.362	132.499	-6.16	8.482
224.4	52.302	-8.938	-17.472	5.752	47.047	-18.841	26.088	44.565		-130.512	52.983	39.082	69.349	8.64	2.988	17.913	-63.713	-167.952	138.622	23.03	18.07
224.533	107.841	82.585	43.241	30.296	84.133	40.17	-12.578	1.548		-1.172	106.824	71.311	32.704	-6.665	37.797	-10.272	75.342	-171.179	102.968	-8.897	-27.589
224.667	13.542	63.101	69.612	6.073	124.744	202.758	-5.517	44.32		-0.197	84.889	43.029	24.836	24.542	69.045	38.791	-45.498	-198.303	67.894	22.159	-5.819
224.8	97.874	6.511	76.045	14.938	97.384	98.921	73.742	48.156		4.033	41.844	60.797	55.733	-2.936	56.91	25.451	26.99	-223.215	52.999	-33.483	17.546
224.933	125.722	61.123	98.294	10.61	75.556	85.296	27.161	23.61		-130.475	233.323	39.146	15.376	22.391	76.812	12.489	94	-210.821	50.285	25.835	-14.111
225.067	156.089	41.576	21.098	22.066	48.772	-110.312	25.447	76.703		3.869	36.448	94.86	41.874	10	77.502	-23.397	39.784	-266.834	46.752	-37.34	-17.221
225.2	56.17	73.199	-14.243	-5.733	107.803	-8.651	21.658	54.752		-5.622	-179.069	75.407	52.532	15.915	85.707	10.336	209.667	-284.057	27.865	-48.012	28.916
225.333	130.472	127.356	46.331	-26.072	81.987	219.958	55.47	32.595		7.377	10.85	59.378	44.099	15.448	-1.841	4.874	280.545	-133.772	11.615	-125.708	17.651
225.467	32.788	23.379	18.728	-26.051	41.736	110.572	107.496	9.154		10.222	27.443	64.821	42.655	21.671	72.489	-4.688	105.968	-353.958	3.548	-80.935	-40.091
225.6	1.757	39.979	7.304	28.345	34.723	109.797	17.833	49.401		-130.51	22.4	33.769	11.977	-30.761	-16.061	25.667	44.457	-95.7	23.379	-133.048	17.83
225.733	47.217	64.555	7.772	9.249	26.51	220.418	11.559	51.414		-130.415	133.63	74.701	67.436	-5.295	45.467	-5.035	-122.28	-6.537	30.053	-127.943	8.134
225.867	14.506	20.879	7.492	-14.586	17.429	-219.169	9.47	80.839		-3.376	13.634	27.049	-40.879	-4.215	10.626	4.491	240.177	27.258	76.556	-109.615	13.287
226	65.29	40.821	-15.103	-2.113	25.361	11.05	21.605	18.041		130.478	28.864	51.07	31.869	10.12	-50.737	151.003	-41.563	116.202	123.907	-27.597	-12.868
226.133	66.501	19.492	-16.2	-24.617	-5.963	-218.022	3.24	89.284		-130.553	47.844	86.144	15.69	7.426	68.744	9.542	124.472	68.254	45.95	-38.97	43.022
226.267	57.907	16.841	-6.273	-13.285	0.574	-111.201	2.13	78.269		-1.141	82.389	78.84	27.166	37.419	64.507	-107.548	229.33	134.656	74.831	33.999	38.821
226.4	134.087	20.258	4.274	-2.674	-6.342	-0.472	3.814	47.724		-130.419	73.528	69.919	-5.204	6.646	14.494	37.122	122.225	116.958	-21.012	-9.03	6.074
226.533	45.172	50.124	1.169	-7.982	-32.436	-103.176	9.803	35.304		0.649	74.334	76.376	70.621	-12.506	68.475	-26.219	123.977	51.922	3.79	-31.988	31.486
226.667	44.376	126.748	32.203	-110.88	-5.368	-15.538	5.156	95.469		-1.312	-19.659	88.092	48.297	49.89	-138.134	26.956	-123.236	266.222	25.197	8.106	-2.645
226.8	128.398	-31.597	72.868	119.565	-15.649	131.076	0.991	78.296		3.794	54.384	55.687	131.337	-21.097	214.53	27.838	-449.158	-121.772	29.646	-5.527	2.849
226.933	85.306	53.13	91.239	-1.811	1.399	113.555	-2.632	72.876		130.501	-1.727	101.783	49	4.803	103.48	9.237	-540.791	89.272	-14.055	44.783	26.705
227.067	44.741	48.901	84.284	-23.367	3.213	123.82	8.294	42.059		-1.229	-2.168	86.291	54.131	6.337	33.545	-7.023	-315.424	146.373	-1.75	121.358	24.868
227.2	90.472	85.771	70.648	-101.068	-6.688	53.569	10.635	92.527		5.226	18.641	161.74	66.045	37.751	26.297	26.369	-71.182	162.356	7.632	-97.83	-18.084
227.333	110.19	45.429	66.226	60.875	-34.833	89.505	-2.454	44.885		2.694	8.496	-54.217	86.76	-33.667	-8.909	-25.403	-207.538	186.126	12.037	30.581	-14.113
227.467	85.819	54.291	117.046	-126.602	-16.011	-0.696	-3.6	65.829		130.502	30.433	183.756	50.526	16.072	16.074	128.575	-122.737	205.062	-17.759	53.296	12.999
227.6	40.252	71.271	64.569	-12.906	-46.678	223.069	-5.678	37.313		-130.437	61.546	-98.653	71.91	-3.313	-2.035	5.551	-278.592	207.559	-23.627	106.436	12.872
227.733	106.4	103.291	44.461	-139.923	-29.613	3.523	8.876	140.362		130.464	45.06	191.771	31.771	16.421	22.372	7.342	-160.028	155.287	-12.747	49.847	-11.695
227.867	96.62	63.432	66.013	-130.135	-38.155	111.003	13.343	64.651		130.472	40.752	69.762	67.299	-10.251	40.998	5.818	-89.69	147.491	27.011	94.866	7.029
228	138.603	130.891	82.449	-232.955	-61.235	222.735	-1.896	70.498		130.5	141.448	74.664	72.665	20.768	-139.12	51.27	-156.602	267.875	49.367	123.954	24.663
228.133	84.218	36.202	109.544	57.598	-64.642	222.644	8.852	89.029		2.064	-2.995	64.908	44.692	-0.992	223.837	19.528	-25.347	110.387	2.512	73.358	-17.371
228.267	112.829	77.794	75.739	-118.069	-130.688	-16.27	-11.218	75.232		-260.819	-12.804	38.777	32.712	12.177	67.284	-123.499	55.318	143.819	-17.136	93.509	18.175
228.4	123.598	86.057	63.862	-97.525	-175.705	222.18	-3.138	91.804		521.766	33.223	-22.322	58.024	-15.394	70.617	-6.394	-43.999	177.946	-40.096	100.229	-16.697
228.533	91.662	91.801	115.781	-95.159	-160.453	-9.819	-17.395	34.453		-130.628	46.508	11.984	-1.728	7.414	87.518	14.939	8.81	169.701	-173.451	135.025	21.385
228.667	82.085	114.88	58.969	-53.086	-174.562	222.162	15.435	71.949		-5.672	50.85	-113.062	8.894	-21.846	85.646	-0.48	148.271	173.09	-162.385	56.971	-15.981
228.8	74.554	67.993	61.638	-75.443	-127.461	-222.864	-3.969	116.868		-130.618	29.869	-42.114	40.992	37.326	58.712	15.509	68.732	307.023	-218.378	82.109	-27.78
228.933	31.464	51.666	54.364	-66.886	-43.194	-228.67	2.004	82.154		-3.818	48.646	125.681	-17.461	-6.118	75.056	-7.509	98.368	185.903	-148.719	57.13	46.754
229.067	54.092	117.145	73.432	-103.224	-2.279	225.303	-3.178	65.676		-130.877	41.436	-8.572	8.385	-2.614	37.152	99.472	-14.314	242.07	-185.544	47.363	-5.489
229.2	51.326	106.294	11.841	-91.67	-0.782	-226.409	1.436	37.927		-2.83	-12.886	-110.749	7.437	-7.621	57.8	13.739	79.8	202.715	-191.88	11.266	-27.805
229.333	6.506	124.79	35.252	-230.07	-10.786	117.761	-26.178	38.437		-130.648	-21.13	49.049	-8.5	-11.964	4.553	-13.339	-85.894	273.987	-225.429	-6.651	10.614
229.467	58.266	75.719	37.315	88.334	-2.246	25.944	17.327	-44.687		130.449	43.585	92.096	-4.937	38.786	106.263	42.309	17.087	76.881	-277.8	20.211	-24.25
229.6	19.642	92.574	49.961	-108.72	-28.97	-221.598	-3.504	18.658		-130.461	35.644	31.779	28.478	-1.18	99.543	29.44	-48.511	286.689	-299.586	37.558	20.785
229.733	217.342	110.108	60.74	-26.192	16.082	6.251	-6.035	50.072		130.478	94.654	-11.025	-11.866	-16.405	66.184	-2.451	37.668	159.016	-222.304	-19.179	-22.28
229.867	128.148	117.128	61.615	-38.765	58.943	1.55	-1.481	49.18		0.479	53.864	-22.072	-7.011	-22.219	38.235	21.25	-11.371	185.426	-181.847	38.991	13.635
230	168.793	125.178	60.961	-71.757	53.742	0.123	-30.665	59.01		-2.325	17.362	-17.672	-21.239	18.215	62.086	13.109	120.517	86.266	-73.104	86.043	15.22
230.133	144.208	26.705	69.769	-64.461	104.205	-110.896	-57.496	49.561		-130.836	105.759	10.684	45.719	-25.582	37.661	-106.386	125.719	83.03	-172.205	133.518	6.546
230.267	4.531	96.032	40.65	-13.048	189.505	-222.243	-27.778	61.736		130.464	49.963	2.385	55.385	-29.414	0.328	-4.723	137.61	93.291	-173.045	85.279	-44.714
230.4	139.198	87.076	32.242	-70.744	224.934	111.753	-63.621	87.486		130.483	39.596	-19.624	127.402	-8.699	39.61	122.621	137.663	98.163	-181.798	56.016	25.97
230.533	122.809	101.294	30.601	-160.264	77.564	-3.55	-80.868	69.974		-130.6	48.182	34.819	46.691	-73.763	38.918	-6.027	260.825	23.229	31.299	49.912	19.414
230.667	116.058	247.417	8.233	-320.662	75.294	10.909	-91.889	17.603		-1.357	-35.765	5.933	128.884	-165.98	-4.876	-11.632	144.908	-14.132	23.794	79.277	-10.215
230.8	170.091	-98.765	30.901	70.573	47.42	222.219	-92.293	29.433		-1.165	76.713	-7.712	146.393	-143.32	216.176	-116.474	132.721	12.04	52.812	39.516	4.154
230.933	230.755	135.687	31.652	-68.72	-20.316	-218.973	-98.024	15.716		-130.607	44.963	23.325	74.234	-160.963	75.661	12.55	109.829	19.289	213.197	46.452	-9.731
231.067	110.256	75.388	20.78	-68.457	36.641	-221.922	-94.557	7.77		2.091	7.452	-134.421	96.674	-139.421	50.17	-11.354	73.311	-32.826	241.726	67.632	-5.572
231.2	115.663	166.545	39.428	-84.255	28.24	-1182.99	-109.014	11.47		261.363	22.826	135.904	88.955	-54.144	34.129	-16.92	78.387	75.237	220.409	-9.481	11.221
231.333	158.004	30.531	19.801	-55.873	28.715	-165.49	-87.456	24.341		-130.746	45.613	-130.326	81.839	-53.596	36.418	-16.044	159.439	2.71	98.639	30.58	-14.195
231.467	66.023	11.338	107.429	-24.462	12.624	-96.829	-100.454	7.875		-6.321	50.032	21.49	51.403	-66.172	26.231	44.676	-6.695	-107.327	11.369	47.333	19.269
231.6	45.529	15.932	-20.05	154.495	177.695	-109.977	-82.999	-15.925		1.119	57.991	114.454	73.844	-28.742	53.576	2.774	338.214	92.505	203.583	28.203	-10.342
231.733	54.367	-9.126	19.542	-20.734	159.665	51.717	-57.191	1.593		1.216	45.999	21.028	60.222	-104.339	30.368	7.246	71.262	79.824	119.651	50.929	22.532
231.867	172.214	-48.281	57.168	-65.23	97.021	35.147	-111.257	112.274		0.326	50.192	22.059	-26.603	-124.958	-10.539	-4.513	82.195	109.335	68.462	35.581	-8.65
232	144.012	128.722	104.062	-113.726	80.46	147.629	-62.443	24.536		-0.053	-7.921	24.649	-202.95	-111.078	-139.619	11.256	-140.987	134.679	21.357	-127.115	39.56
232.133	113.484	-133.498	38.195	165.419	78.128	72.649	-38.554	9.428		4.745	97.844	-87.01	-68.556	-92.909	176.164	-8.475	-35.125	171.503	50.688	186.377	35.855
232.267	93.516	-12.763	179.674	3.616	71.341	127.833	-13.416	-85.461		130.535	44.16	138.609	-30.127	-126.687	11.669	14.383	125.731	-47.358	-23.831	54.713	11.728
232.4	8.491	-12.144	83.856	7.656	38.917	125.277	21.372	7.26		1.105	52.353	22.895	-11.372	-62.264	8.718	-23.637	21.696	14.361	124.49	16.409	21.703
232.533	-17.959	-17.266	78.264	22.555	-19.063	142.078	65.805	-12.623		-2.733	113.242	23.915	-27.468	-38.205	12.237	-64.1	37.053	-11.72	131.87	129.724	23.022
232.667	3.373	-17.586	37.392	-19.802	-62.917	116.244	25.6	14.55		3.503	34.323	-14.424	-80.429	-3.215	46.077	-66.212	135.982	132.341	214.936	34.905	-11.041
232.8	31.434	3.539	38.43	-36.506	-64.975	31.31	43.905	-23.154		-0.471	52.108	13.581	-132.296	-19.31	34.249	-79.93	92.311	32.099	138.65	72.966	28.971
232.933	-40.635	-18.225	41.501	-52.385	-113.436	110.74	-87.549	9.502		-1.616	38.401	3.145	-83.543	-18.603	20.127	-64.791	6.602	-64.858	72.763	113.241	-81.563
233.067	-7.594	-16.633	28.322	-17	-35.316	111.268	-10.851	49.802		2.585	104.269	-8.527	-56.367	71.097	63.831	-47.448	-124.705	136.137	125.462	164.935	19.275
233.2	-15.463	-17.793	3.109	-1.716	-158.225	222.818	2.293	90.629		-130.536	98.066	-3.239	-83.385	63.814	-67.202	-83.587	69.669	55.24	45.35	118.042	30.343
233.333	-102.201	129.245	-29.149	-212.785	-155.179	-111.004	-46.641	103.097		-2.886	59.913	-10.601	-57.961	12.737	24.708	-56.833	33.444	273.703	63.57	-11.61	12.648
233.467	-142.627	-121.155	-10.569	366.86	-216.832	-4.551	-19.041	110.327		2.766	71.804	-13.223	-46.854	57.724	200.774	-41.345	-13.41	46.89	147.502	255.777	20.544
233.6	-188.907	4.458	29.96	214.21	-226.901	-21.122	-7.071	72.579		0.152	33.179	-15.373	-51.527	49.822	18.432	94.814	-169.181	86.474	170.136	60.509	24.373
233.733	-148.479	-4.253	-4.809	77.533	-231.387	-117.577	-18.396	106.608		0.603	42.07	116.791	-35.669	119.002	-2.588	-137.654	77.092	58.263	133.168	112.454	3.394
233.867	-220.227	2.061	-27.851	38.995	-87.733	110.742	4.154	127.099		-3.142	-10.634	-64.091	-78.451	72.481	44.965	17.611	123.4	28.469	66.617	20.578	4.874
234	-253.54	-2.679	-84.667	102.16	-33.159	-4.125	121.213	88.721		0.643	30.086	187.993	-145.72	84.807	51.671	99.527	-30.768	-66.484	69.928	-25.523	8.059
234.133	-138.248	14.747	-82.417	28.839	-100.128	-34.357	170.976	63.05		1.071	6.283	103.98	-155.929	17.339	46.61	-78.33	175.773	62.39	118.335	111.421	4.968
234.267	-163.239	4.061	-169.908	14.426	-185.337	-450.293	138.418	34.323		1.319	21.859	-35.15	-158.201	19.547	33.056	-49.936	-47.575	116.798	134.334	43.04	2.105
234.4	-156.645	20.305	-396.167	44.442	-133.392	-404.416	29.587	120.034		2.236	-6.208	29.952	-157.155	23.327	45.988	-71.57	114.682	124.49	99.801	-98.395	-7.442
234.533	-198.094	10.248	-211.205	22.637	-143.773	-221.494	25.246	14.672		0.789	78.711	148.206	-157.799	5.456	17.217	-63.121	193.699	253.071	126.744	64.331	-8.726
234.667	-107.821	248.359	-222.348	-113.823	-131.878	-282.195	80.029	42.314		2.734	40.142	28.554	34.377	33.433	-61.532	-60.115	67.286	139.706	60.765	-15.984	20.76
234.8	-325.766	-221.282	-85.262	89.653	-151.728	-82.41	21.022	83.902		1.683	54.873	50.082	-130.018	61.539	17.055	-71.566	38.718	99.339	186.573	71.993	-22.199
234.933	-227.822	53.845	-256.806	69.867	-216.938	-83.228	-3.441	13.006		-130.766	99.636	75.837	-89.946	28.769	114.581	-43.874	91.149	119.877	150.127	69.839	7.148
235.067	-196.236	7.725	-89.825	6.302	-65.934	-41.434	-11.324	16.943		130.474	66.479	73.943	-24.895	59.707	-11.711	-61.389	52.502	86.868	126.741	23.832	0.932
235.2	-266.251	98.927	-161.375	-49.17	-34.997	-30.282	-68.089	21.932		-130.513	11.845	26.881	-24.088	139.897	119.871	-102.552	13.444	85.73	124.938	-21.992	18.381
235.333	-156.891	121.884	-241.466	16.148	92.41	37.275	67.24	51.323		130.463	46.679	56.009	32.443	100.301	-54.509	-69.242	-111.677	33.687	60.161	48.438	9.56
235.467	-132.635	121.897	-177.547	68.87	64.681	9.001	22.189	11.395		1.239	56.153	-61.601	161.7	81.382	15.3	-114.213	142.871	259.507	145.059	27.794	-17.914
235.6	-130.319	93.147	-209.349	12.671	75.513	-8.53	19.081	-4.989		-0.806	4.098	165.725	9.346	104.905	29.236	-103.17	22.489	52.769	101.607	-31.2	-9.14
235.733	-168.923	114.589	-144.61	-14.532	81.087	-21.778	38.885	43.12		-3.37	42.896	34.899	-12.575	59.976	108.008	2.758	77.847	118.684	-41.502	-15.806	-19.46
235.867	-156.405	97.404	-161.399	66.85	67.015	-26.828	6.529	68.319		0.707	-16.043	50.513	12.945	83.637	-76.874	-24.801	-55.164	88.25	45.28	7.548	38.284
236	-106.917	249.059	-179.789	114.35	134.832	-36.183	13.165	17.087		-130.824	-144.123	139.582	18.116	137.767	-143.047	-29.5	50.053	137.182	7.518	-127.822	-6.326
236.133	1.887	-111.622	-101.659	-16.531	110.531	11.909	8.1	9.6		-261.104	164.083	8.09	24.053	-77.081	182.996	-118.051	-184.155	71.168	33.557	187.524	1.659
236.267	-209.25	58.597	-11.528	19.19	84.007	47.111	-11.465	28.528		0.69	38.353	45.873	14.969	6.793	22.67	-30.146	333.282	150.961	59.717	81.189	8.85
236.4	-183.737	25.121	-6.54	-3.536	91.429	27.61	-3.546	16.214		-130.635	-49.494	77.402	52.436	78.693	5.675	-19.702	-158.565	104.946	-17.726	84.299	-14.174
236.533	-133.775	46.351	54.473	-16.591	103.529	7.686	4.306	18.712		2.419	60.214	32.635	40.258	6.152	15.426	16.486	108.312	87.878	45.886	74.229	6.878
236.667	-52.812	39.466	78.192	-13.564	89.873	-15.35	-22.613	-23.774		130.463	32.026	25.837	38.674	-44.813	69.875	-15.16	3.968	117.045	20.259	132.529	-64.325
236.8	3.841	93.573	43.539	23.616	17.729	83.133	4.677	13.404		-1.386	74.197	122.458	92.202	33.474	-9.977	21.695	214.477	222.737	61.879	95.533	57.288
236.933	-4.614	70.255	68.154	117.842	7.211	26.651	-30.188	-11.574		1.529	99.813	103.123	-7.329	39.391	52.539	26.492	-20.961	130.575	168.95	146.715	-8.645
237.067	68.651	37.263	70.664	47.803	11.18	-4.775	9.641	-52.367		1.067	58.639	60.719	48.163	24.174	60.439	-22.452	208.565	44.104	-27.103	51.591	-12.982
237.2	135.422	80.798	20.147	28.075	2.698	81.533	1.454	24.012		3.955	51.162	71.56	-2.853	43.711	93.903	9.614	53.387	-97.306	42.976	172.714	18.909
237.333	259.663	247.355	50.527	-30.701	2.319	35.465	-10.403	45.037		-130.569	4.863	136.378	20.458	146.58	-147.527	38.469	21.501	136.222	-3.055	-32.163	-11.811
237.467	73.37	-123.728	24.096	-27.271	16.387	17.312	5.113	13.593		-130.872	66.339	-65.227	19.985	-98.185	269.031	-67.044	351.998	34.83	-186.403	154.171	-1.327
237.6	57.508	48.269	-21.388	-28.047	-10.115	44.916	-175.4	1.295		130.576	-7.807	34.618	12.23	97.358	30.501	-71.423	-119.507	150.027	-417.255	-67.731	14.168
237.733	107.909	86.498	10.967	6.704	-3.26	86.188	-226.485	-7.43		4.551	80.595	-78.204	38.308	35.491	77.266	-15.856	25.63	212.62	-258.806	117.692	-34.164
237.867	109.394	64.561	10.391	133.387	-22.005	131.993	-160.455	10.301		-3.711	-7.573	93.218	49.906	74.388	51.18	-20.806	125.769	56.657	-247.06	4.285	23.776
238	121.965	59.82	9.791	38.195	8.191	148.336	-161.027	50.008		4.102	54.908	34.614	9.725	24.615	39.31	89.114	-91.403	136.059	-198.123	-61.537	11.294	23.092
238.133	94.601	38.582	43.199	-80.67	-26.33	118.668	-173.416	15.432		-131.257	58.133	3.231	49.056	33.36	14.277	132.84	223.187	240.298	-269.78	22.939	-13.017	-136.409
238.267	124.618	35.689	30.9	140.046	34.599	14.831	-189.039	43.803		9.777	110.026	-21.108	41.921	28.963	76.505	14.619	82.797	141.974	-237.139	64.935	4.715	-162.177
238.4	98.954	-4.73	33.07	30.426	-15.702	58.734	-65.767	46.878		-132.397	67.513	-8.581	14.704	52.991	14.857	13.9	44.636	101.103	-297.512	41.423	-23.109	36.719
238.533	139.004	106.689	9.555	19.483	-30.361	96.809	-54.641	36.228		391.57	60.935	27.974	6.387	13.063	55.165	9.904	-126.324	110.749	-279.022	64.037	23.169	-117.899
238.667	151.783	95.143	34.568	-14.359	-8.006	35.966	-170.3	23.968		260.787	63.093	-134.815	-19.32	39.265	-17.695	19.064	-62.351	136.463	-256.621	-19.651	8.96	-7.433
238.8	104.576	110.082	-21.242	-23.582	-5.776	82.459	-82.476	44.963		3.711	44.749	-59.593	22.53	30.138	71.213	9.984	206.335	90.558	-201.846	75.957	7.779	12.45
238.933	106.03	77.097	44.409	-18.734	2.482	1.247	-32.48	14.458		5.683	40.371	-42.577	4.353	13.614	31.474	-6.897	-17.384	121.541	-136.362	142.236	-10.824	-121.447
239.067	20.511	38.145	86.496	-8.697	-5.218	-64.518	-4.926	13.129		10.887	24.976	-60.925	-21.952	-23.397	30.571	13.26	38.049	52.316	-82.711	-12.789	-4.872	18.614
239.2	82.204	40.754	90.465	79.494	7.372	-81.179	-58.092	39.36		-133.031	31.558	46.614	30.222	46.352	116.945	-7.789	-17.285	36.434	58.531	7.37	-5.358	4.921
239.333	138.683	42.47	80.978	-85.798	-8.566	-208.066	6.038	36.976		132.532	75.92	-24.819	-12.759	-9.576	-84.337	16.73	-202.561	64.995	100.851	-69.201	8.733	-116.224
239.467	132.265	24.775	144.703	90.291	35.384	-211.77	-8.622	72.736		131.313	17.693	-170.291	4.92	-37.446	153.042	-7.296	-111.571	9.929	139.846	27.621	-3.761	2.502
239.6	105.838	-15.493	20.174	7.577	70.704	-243.8	-65.004	68.226		-131.995	52.233	11.016	24.985	14.742	-65.77	1.853	-109.534	87.924	116.835	42.391	-58.335	118.719
239.733	111.929	22.08	84.801	22.397	51.891	-205.166	-7.573	55.621		-393.341	93.053	-142.692	-10.141	-24.954	27.587	-6.969	-280.654	65.424	105.639	105.899	22.932	-120.064
239.867	56.955	14.146	163.081	-6.424	32.926	-286.191	-32.762	84.031		-6.341	48.653	-258.838	-11.008	69.242	60.552	-4.482	-191.23	119.911	141.933	8.675	-26.389	-119.001
240	129.491	125.302	65.717	-114.769	18.289	-62.845	19.446	33.862		-130.45	-1.759	-141.336	23.551	20.652	11.785	11.792	93.776	65.024	158.437	-18.896	-18.421	8.876
240.133	33.723	-63.823	32.69	132.748	-15.873	-205.704	52.461	86.261		-132.249	104.691	-342.794	-47.289	36.022	162.196	26.087	-163.734	207.571	46.793	-61.384	35.08	6.108
240.267	-24.167	-13.017	34.392	-10.354	5.716	-184.446	189.933	62.953		-261.323	22.586	-271.293	80.847	106.367	26.048	44.997	-156.585	45.91	105.967	134.023	-43.265	-1.925
240.4	204.765	-97.982	149.932	-35.422	14.172	-66.35	429.608	263.732		-1.422	315.036	-170.982	444.63	322.844	120.624	112.214	40.712	431.393	142.47	252.001	98.287	118.63
240.533	309.633	271.973	377.814	15.857	40.803	116.75	420.24	278.026		130.542	246.19	-95.253	393.67	278.617	152.256	276.392	434.386	147.691	188.233	286.989	80.603	118.286
240.667	345.94	334.155	310.544	-44.447	145.162	220.864	361.25	316.976		-2.83	207.141	-152.112	349.996	276.372	161.837	165.54	219.177	271.311	185.534	259.357	157.315	118.972
240.8	300.127	232.974	354.101	151.801	108.64	241.528	142.065	211.906		130.231	93.25	100.194	323.668	323.115	71.383	124.993	244.398	320.624	233.384	200.697	105.425	139.387
240.933	283.367	288.71	323.388	-74.134	84.203	201.875	156.349	187.481		-10.042	158.126	44.092	276.793	134.352	142.656	143.288	128.326	319.527	168.859	182.358	126.972	80.139
241.067	317.357	196.447	275.402	59.757	81.158	213.402	190.915	188.437		131.41	125.903	10.611	272.563	178.21	113.856	90.206	357.457	313.063	258.147	144.949	140.671	112.032
241.2	382.94	389.959	222.941	70.345	17.321	192.586	174.02	238.103		130.937	176.261	85.575	145.275	170.23	121.878	153.108	183.708	369.42	185.544	74.289	122.999	68.716
241.333	227.479	235.077	242.786	23.58	229.954	115.653	146.233	178.324		10.835	142.978	147.488	208.261	93.493	-5.026	-48.513	105.369	273.835	208.149	134.352	69.149	62.172
241.467	406.197	98.119	164.522	92.658	120.922	195.208	114.79	153.258		2.813	92.882	-41.128	98.892	97.376	196.221	46.753	262.828	217.844	235.125	-68.12	80.389	12.333
241.6	254.967	242.86	147.742	4.529	84.501	242.952	23.048	172.893		130.524	121.777	66.913	171.32	70.558	53.718	57.111	205.521	166.756	120.164	78.145	19.764	140.558
241.733	192.613	44.647	55.368	3.506	106.199	122.061	24.378	55.098		-131.511	40.316	5.095	167.896	67.714	67.799	12.774	151.469	182.499	109.797	65.263	39.948	64.14
241.867	131.318	111.234	104.126	7.007	64.002	53.879	58.235	160.923		130.801	117.378	41.807	118.585	29.471	66.504	51.176	245.205	166.122	-68.073	113.777	81.179	4.485
242	103.519	57.678	113.385	-6.767	42.645	144.22	66.325	133.341		131.282	96.748	8.499	156.032	47.931	97.596	107.293	155.078	182.857	46.213	231.503	29.2	64.882
242.133	49.552	63.969	55.37	-14.934	44.983	207.85	38.026	109.176		130.465	88.981	-10.183	125.794	29.901	70.208	73.11	188.434	132.711	85.625	156.055	16.065	132.266
242.267	62.153	60.673	146.914	11.97	6.299	217.076	25.543	181.529		-130.157	77.141	-27.278	-57.393	34.244	69.821	115.36	200.375	134.932	88.297	53.161	7.556	13.004
242.4	25.731	94.584	103.848	-114.829	-37.877	174.831	-5.556	166.822		130.627	83.551	-4.84	166.662	66.649	55.634	12.755	251.281	115.184	63.387	125.6	35.056	24.589
242.533	25.452	87.953	147.338	61.706	8.142	156.944	11.381	138.361		19.919	77.154	-16.429	-50.614	46.305	23.576	-5.161	176.749	111.774	-8.246	174.068	19.613	10.986
242.667	-8.617	81.509	101.55	36.791	4.45	200.095	75.192	87.66		-7.365	142.806	-5.115	276.266	141.827	-25.685	35.801	180.678	140.367	58.388	168.131	-125.623	14.294
242.8	-7.645	72.397	114.203	29.618	1.639	107.168	20.795	28.061		131.235	51.811	58.196	-173.502	-53.81	90.823	29.562	160.356	103.385	61.323	181.382	182.703	53.291
242.933	-4.6	140.048	96.713	4.5	-16.523	114.731	48.224	50.875		18.454	111.137	50.539	34.053	-4.708	38.673	-32.514	312.63	117.862	61.364	138.154	11.377	28.478
243.067	-12.893	97.042	79.148	92.527	9.574	92.106	21.541	74.537		131.616	61.889	-91.265	27.299	61.313	68.693	46.348	119.376	158.234	-39.12	111.596	-4.883	63.695
243.2	-4.516	119.25	51.175	31.548	-40.199	116.862	72.07	112.336		25.129	130.76	167.095	17.3	-21.314	66.172	-2.671	272.943	161.762	23.98	109.899	14.488	14.03
243.333	18.164	25.506	97.364	38.964	-15.357	191.834	41.237	89.049		-130.79	64.259	45.234	73.219	-9.9	40.476	56.376	216.986	125.976	-101.106	111.69	-0.465	13.981
243.467	-15.041	55.535	56.555	6.042	-55.215	129.911	8.509	83.924		262.18	66.547	-36.498	183.3	12.115	72.522	2.581	187.832	141.386	-212.172	142.013	9.101	31.741
243.6	-2.319	62.781	71.138	5.002	-80.841	160.032	-15.1	29.144		-130.329	86.305	-34.287	54.526	42.259	18.247	13.644	282.198	159.14	-384.417	168.915	7.451	60.522
243.733	7.35	79.873	34.519	19.847	-150.16	107.444	2.578	75.267		133.649	80.066	37.771	12.059	153.157	29.563	-1.378	198.411	115.497	-271.651	125.667	24.598	48.618
243.867	-55.68	24.599	59.189	-6.457	-256.755	154.236	31.966	46.637		-24.889	76.897	-5.717	-23.335	65.432	-26.873	46.661	72.728	47.213	-322.577	171.026	67.924	-105.419
244	-12.449	53.745	60.155	18.142	-297.718	141.459	-8.853	66.192		18.218	151.563	-9.76	-11.834	72.503	-2.511	-15.606	306.53	140.431	-318.95	126.651	-6.278	151.579
244.133	-41.653	47.396	59.511	17.491	-304.33	101.234	29.392	45.185		131.352	-66.31	97.624	48.405	96.843	-27.007	-8.428	302.463	-141.187	-252.683	248.007	-19.402	76.17
244.267	-126.835	36.687	27.565	-17.829	-242.533	35.797	20.951	7.408		-14.593	8.178	-91.889	19.534	68.897	43.135	68.973	-67.062	57.937	-196.794	121.693	39.934	35.785
244.4	-23.091	34.669	44.114	6.105	-154.317	91.865	96.802	11.303		-18.2	44.268	264.654	102.599	46.186	31.908	16.75	57.19	167.36	-137.38	92.092	-12.967	-90.275
244.533	-39.478	25.968	46.868	2.074	-142.965	140.177	114.385	9.341		-130.825	9.244	14.138	111.923	69.798	-28.932	-18.069	190.165	157.855	-277.731	96.143	2.353	156.261
244.667	-23.887	47.244	32.984	-12.318	-107.929	126.757	87.381	-14.121		16.965	49.852	50.942	18.348	61.256	17.745	7.505	257.773	141.855	-218.412	60.921	-16.825	8.775
244.8	-98.99	83.402	-14.372	27.494	-100.092	141.016	77.395	-9.902		-6.089	35.415	-42.74	26.923	21.612	-54.483	1.531	114.541	97.161	-167.837	68.714	11.605	75.255
244.933	9.775	40.459	3.998	-19.694	-122.846	179.467	30.985	25.671		130.49	3.902	81.844	13.595	92.223	-276.543	-8.643	278.37	73.202	-90.775	90.486	20.884	-66.99
245.067	-30.693	97.206	46.347	11.91	-126.806	148.004	28.164	114.845		-130.528	-24.589	94.837	6.464	14.226	-88.894	19.108	232.445	81.154	-135.094	108.403	5.989	115.784
245.2	-9.824	46.689	131.447	29.025	-88.332	93.61	37.68	11.063		-1.001	125.851	110.742	7.963	97.543	-206.2	-12.962	253.893	53.1	-85.725	93.138	10.219	106.069
245.333	-15.239	58.453	20.442	4.7	-40.119	71.319	72.077	-88.05		130.565	22.493	87.51	7.311	86.546	-410.746	-20.831	153.368	139.804	-5.568	135.532	-123.257	132.935
245.467	-32.404	54.102	-57.61	2.392	-23.795	83.851	45.666	-21.623		-130.547	88.795	59.744	31.653	41.97	117.06	40.399	198.322	14.918	5.724	157.585	150.525	222.83
245.6	8.041	100.027	121.392	21.543	28.588	88.03	36.092	15.191		260.936	74.393	76.561	-31.222	21.439	-114.545	7.961	222.589	105.379	52.306	92.399	5.276	67.943
245.733	2.251	61.661	46.411	13.644	21.503	149.095	18.703	-2.181		130.638	18.448	26.681	25.503	48.145	-40.558	19.321	171.321	101.004	51.665	114.532	35.514	57.122
245.867	-12.696	90.46	110.798	11.97	-35.622	156.206	-3.165	10.516		2.617	-37.721	56.185	-3.627	62.035	21.635	4.813	96.907	76.467	70.449	122.358	18.097	24.499
246	-14.607	154.39	72.862	-13.769	48.03	172.113	37.403	7.956		-130.712	67.13	182.074	21.656	37.166	47.174	-4.462	181.348	52.345	249.949	102.733	-27.623	58.271
246.133	7.603	139.04	-15.227	14.374	81.219	155.905	-2.667	17.672		130.506	-56.823	37.491	10.218	52.159	108.201	13.957	188.132	137.208	120.555	77.812	4.927	66.682
246.267	30.644	119.257	109.335	-21.813	109.773	145.008	7.211	139.006		130.462	-53.74	39.891	8.523	23.596	110.082	16.186	298.991	46.124	55.592	84.034	7.837	111.927
246.4	1.271	87.473	109.927	-2.303	54.629	168.153	14.086	37.284		130.48	-32.27	37.991	68.666	42.169	63.225	-8.718	-35.487	41.545	275.191	100.24	-17.741	63.52
246.533	-22.827	81.104	133.295	3.076	-47.604	158.355	-23.456	7.177		9.863	-43.173	17.682	44.056	26.872	97.499	38.855	229.437	46.07	122.84	-24.645	-21.681	98.639
246.667	-19.598	27.485	102.947	38.95	-7.681	206.737	-13.003	10.647		-0.85	-150.005	-99.127	41.863	7.849	-3.252	-47.455	103.263	137.579	135.984	51.916	-38.643	142.122
246.8	-26.463	81.963	80.954	-2.244	67.664	178.478	-9.613	35.726		-4.534	220.331	97.444	40.003	30.957	14.265	42.257	220.828	-13.813	-88.358	33.224	-97.249	110.692
246.933	-6.704	68.19	79.507	58.498	154.809	179.161	2.788	38.081		130.438	46.841	61.861	80.674	-9.674	240.384	58.835	176.444	44.125	45.797	16.039	123.366	59.501
247.067	-11.314	44.601	36.875	83.579	37.41	150.957	-5.268	31.717		13.612	130.764	29.659	16.586	-3.258	32.201	66.309	270.738	98.115	-35.105	15.459	20.233	124.838
247.2	28.703	11.022	63.402	51.401	74.944	157.354	-24.916	49.969		-130.158	32.305	39.105	13.962	9.698	54.106	61.813	192.125	18.927	-58.353	10.02	-15.152	72.436
247.333	31.476	35.264	70.538	38.234	58.725	223.274	14.216	-13.278		11.051	49.005	88.82	61.628	10.56	61.551	105.737	172.5	133.247	-288.248	-6.058	6.409	74.083
247.467	-66.077	-3.803	-17.459	35.521	12.305	199.523	7.133	63.933		4.624	-19.61	-7.332	29.419	27.367	40.902	22.832	196.671	-108.201	-360.322	22.161	-10.041	56.508
247.6	43.04	11.948	11.913	28.275	-20.506	170.628	16.892	46.056		2.061	25.474	18.98	39.939	44.435	19.59	43.717	113.134	117.814	-379.857	-15.133	5.478	19.006
247.733	61.418	62.361	36.5	-10.975	2.045	98.068	-14.958	40.75		4.45	-22.739	130.118	85.997	50.767	48.953	35.73	114.493	-102.819	-164.223	2.884	-13.936	48.847
247.867	14.754	-35.267	46.869	20.162	6.402	21.463	3.203	18.559		-2.22	5.891	9.018	18.804	49.872	25.771	16.611	74.065	3.919	-319.753	-11.022	-2.58	12.68
248	-10.384	17.805	70.545	2.269	45.786	141.264	-2.239	-24.335		131.23	41.979	43.78	64.163	62.343	-38.443	-13.902	136.62	22.057	-351.713	-9.998	26.017	15.703
248.133	92.544	14.24	84.044	3.329	69.858	173.546	25.358	16.006		-130.661	-15.24	51.49	30.796	30.582	25.474	-5.141	103.975	-65.657	-304.68	8.201	35.931	58.931
248.267	-11.539	11.298	51.637	2.437	15.394	119.247	27.807	18.829		130.483	8.829	52.262	32.153	22.807	17.39	33.254	221.721	-307.256	-289.106	-12.959	-5.614	63.28
248.4	-4.769	26.565	95.08	-3.991	79.085	277.48	-8.177	17.167		-130.38	-88.173	52.402	69.089	52.391	-23.411	-17.837	75.894	-69.93	-263.685	24.165	14.852	72.329
248.533	58.579	13.836	19.313	12.021	68.101	120.709	55.805	54.456		130.414	-188.137	53.948	148.22	25.704	38.598	47.904	136.126	-336.797	-247.453	-18.731	50.457	68.973
248.667	-4.952	38.001	36.734	-16.252	79.545	121.38	48.468	-3.171		-7.605	-206.501	63.221	79.642	37.48	-92.409	1.984	68.279	-184.448	-324.659	41.131	-2.145	23.084
248.8	-9.357	140.648	10.756	3.247	-4.214	97.165	112.853	6.61		-130.432	-154.299	19.855	117.33	-26.938	138.775	53.374	221.417	-228.118	-72.839	-79.517	33.285	39.457
248.933	-1.415	120.086	48.364	-9.275	51.188	122.604	37.727	-73.13		130.543	-172.694	54.23	63.751	27.418	66.257	96.41	110.111	-294.623	-134.2	-119.468	-8.795	81.318
249.067	-92.474	65.832	37.41	-18.839	17.171	73.807	42.006	63.967		-0.048	-165.303	21.404	86.508	-17.546	40.509	57.269	157.759	-168.961	-175.387	-234.03	9.937	73.212
249.2	-102.047	73.183	47.755	14.205	7.082	-24.622	9.832	-13.681		-0.051	-120.932	49.234	52.967	3.933	-2.923	38.832	198.415	-185.932	-109.293	-267.869	-32.09	99.785
249.333	-106.234	104.211	59.647	8.364	9.464	-10.67	8.834	25.115		-2.734	24.003	143.49	60.685	18.498	-4.034	29.588	162.016	-142.806	-311.055	-318.03	15.924	37.52
249.467	-144.865	110.063	19.316	4.42	-46.13	-7.771	23.998	0.226		-0.346	-248.653	-30.77	-17.781	33.338	8.79	45.711	114.381	53.437	-172.25	-242.944	25.894	141.839
249.6	-106.681	66.978	13.005	-4.548	-31.036	138.075	-8.842	-78.531		130.428	-89.453	-21.373	104.892	-22.532	7.337	-2.372	133.394	-17.974	-192.9	-200.353	-7.811	223.431
249.733	-92.943	141.832	-8.827	-10.284	-42.936	191.809	34.304	3.458		5.296	-50.169	29.488	85.339	-39.948	125.875	32.36	235.449	-46.46	-266.077	-213.703	35.635	117.243
249.867	-104.483	113.588	44.617	2.225	-34.152	120.348	-3.892	78.474		130.5	-56.76	19.634	73.562	-119.292	26.471	4.896	11.094	-84.648	-270.418	-340.805	-41.934	-35.535
250	-153.894	23.45	100.948	25.286	-46.863	154.122	-8.477	16.792		-4.497	-38.195	82.949	74.253	-138.714	-3.92	16.118	301.069	15.233	-262.228	-215.625	-9.915	56.829
250.133	45.995	80.246	194.372	9.638	16.406	124.686	22.211	-70.162		132.254	-13.459	55.737	64.983	-217.643	-18.06	14.699	174.136	85.381	-295.811	-163.001	-1.769	158.31
250.267	-116.62	83.65	60.053	27.293	36.623	119.079	12.837	15.535	24.083	11.996	-40.296	67.032	57.488	-226.556	55.814	23.843	147.448	133.649	-295.353	-100.737	29.906	75.563
250.4	68.992	192.641	138.418	-4.561	40.907	101.803	18.955	-6.289	1.811	1.274	66.383	44.052	42.822	-215.911	-29.526	28.344	110.742	80.192	-104.907	-111.786	40.824	16.318
250.533	-33.226	-68.726	81.055	16.055	3.781	102.273	36.907	-8.436	9.752	5.812	36.072	45.394	-71.231	-119.486	-20.781	14.268	114.904	30.181	-32.956	-11.439	67.136	32.636
250.667	-5.711	123.483	-16.08	37.307	27.169	66.221	40.551	-21.229	119.315	131.078	-27.935	142.298	42.238	-72.112	-96.728	17.762	180.659	43.178	94.837	-25.78	38.081	8.482
250.8	73.285	-134.5	173.696	-11.66	18.223	64.413	42.128	7.052	-7.582	18.006	96.955	87.299	-48.426	-135.997	82.492	-55.831	146.404	48.293	35.864	-38.974	40.751	41.652
250.933	20.868	193.042	79.034	8.162	84.018	65.402	-6.952	48.146	1.959	-21.892	39.469	-118.717	83.848	-38.279	60.138	52.608	185.388	33.463	48.539	-7.577	43.18	54.624
251.067	39.976	87.917	91.594	24.034	137.153	33.279	16.541	67.264	119.571	-17.123	3.25	20.989	-6.765	-59.508	-15.392	-4.652	138.55	78.847	3.164	14.61	-14.189	19.652
251.2	26.097	150.173	108.107	6.243	17.223	33.235	45.647	17.075	1.583	-6.671	14.526	149.598	11.511	-39.91	27.539	-36.794	265.717	137.148	46.932	5.751	-6.752	32.058
251.333	14.479	64.865	71.447	-13.089	24.093	54.027	6.73	37.8	5.319	132.491	-23.559	-100.387	48.216	14.003	27.72	-12.443	188.207	31.055	73.627	82.845	39.56	-28.546
251.467	3.661	-28.941	84.85	3.209	-28.653	104.239	4.623	51.084	118.018	15.123	22.272	122.621	-13.251	-9.482	-25.687	-49.275	71.5	144.735	78.982	72.978	12.063	23.463
251.6	26.305	185.344	65.431	-84.935	-25.081	68.901	-9.435	73.64	0.259	-4.777	-12.143	-64.955	122.221	-125.638	-6.675	-38.629	177.961	104.806	137.986	107.44	-6.377	141.962
251.733	3.217	26.568	17.637	98.6	-67.679	66.376	7.178	21.713	22.875	1.887	13.842	-28.286	-76.703	81.497	-16.392	125.85	122.862	64.526	105.16	102.761	30.073	11.083
251.867	123.661	88.276	111.184	-106.096	-27.383	22.471	29.394	25.748	121.012	2.7	-5.804	67.063	23.168	8.492	44.598	19.961	202.501	112.189	101.118	189.646	-13.592	-32.768
252	-110.504	122.226	71.506	116.743	-175.613	28.8	55.955	34.264	118.164	130.469	-12.714	1.209	139.054	-30.592	-20.229	-22.38	-24.522	216.883	72.869	74.682	-55.35	191.987
252.133	18.051	64.59	26.426	-12.321	-209.059	106.823	54.622	24.622	118.383	-133.279	-15.814	197.213	-13.205	75.925	33.381	22.051	117.535	-80.903	10.076	46.055	95.656	-11.461
252.267	3.969	114.815	108.21	44.783	-245.384	111.985	25.467	8.82	59.307	15.532	16.293	114.857	-11.158	70.738	-17.928	22.893	188.887	142.794	62.203	72.659	-45.505	63.222
252.4	10.986	196.209	94.442	8.171	-193.713	52.744	47.525	0.55	71.771	-2.415	22.613	-22.212	31.519	-3.714	31.705	-15.424	101.91	92.166	106.199	66.53	21.691	-9.179
252.533	14.213	72.452	79.112	-7.089	-130.448	125.153	48.031	-12.999	35.512	-9.767	32.461	29.416	1.765	-42.423	-74.474	22.581	97.489	169.411	149.292	105.862	-17.045	54.669
252.667	13.607	64.801	99.621	2.249	-125.671	51.643	59.407	-12.464	45.02	-4.638	21.643	52.321	22.678	86.152	-228.812	4.81	106.083	120.867	124.245	174.25	26.714	38.637
252.8	3.656	113.294	52.343	-13.539	-89.671	61.567	45.217	-4.586	18.417	-9.42	8.403	23.624	22.143	36.387	-210.511	2.042	100.151	128.177	168.612	110.937	-26.546	66.408
252.933	9.591	-74.934	35.515	1.93	-104.652	30.346	39.158	12.069	26.221	29.294	30.963	16.421	-116.307	110.557	-327.455	7.515	69.533	150.064	175.577	11.612	-29.323	94.061
253.067	9.397	196.388	50.008	-11.093	-108.194	25.781	100.688	19.508	25.805	14.859	6.214	6.646	21.594	167.865	-65.869	-1.98	29.406	128.145	106.905	176.812	38.271	117.526
253.2	14.854	84.672	72.072	12.684	-100.662	28.402	97.365	7.475	-19.326	31.205	6.045	22.057	140.33	118.746	-127.061	-11.489	89.046	112.505	102.375	93.858	-33.97	60.059
253.333	-11.093	57.621	57.723	68.771	-72.693	-4.718	86.783	-15.004	34.547	2.929	7.366	142.138	10.873	143.34	-273.753	15.775	109.102	270.42	135.354	136.255	-51.914	43.55
253.467	108.186	-24.179	85.849	-4.24	-123.846	-54.675	37.092	15.527	28.797	66.078	70.622	59.017	28.605	69.776	-15.226	-11.813	53.282	52.504	257.977	70.923	82.257	40.527
253.6	22.49	57.128	37.521	15.91	-127.964	-40.075	102.204	11.493	15	22.951	2.272	-89.93	71.387	51.572	-112.724	-6.776	111.971	174.958	104.452	96.506	-90.477	34.665
253.733	21.481	152.14	43.061	12.527	-193.056	-90.82	-45.629	-11.324	36.038	73.126	35.659	34.078	10.736	19.552	-127.916	-2.912	33.627	100.579	229.982	90.531	47.55	-11.906
253.867	67.913	28.469	54.892	21.384	-126.697	-52.007	7.227	-3.266	46.754	22.625	6.449	142.578	26.494	43.622	-92.571	-23.305	29.702	86.259	238.467	96.13	35.35	49.563
254	28.457	-9.651	100.069	52.904	-52.857	27.186	48.981	-22.056	63.865	49	17.17	23.901	38.707	17.255	-46.48	-20.974	-24.274	89.267	154.181	89.857	-5.278	26.146
254.133	47.04	-99.124	-2.575	11.934	-19.551	-66.18	5.438	8.925	57.897	10.196	55.453	60.448	22.697	-5.427	3.964	-24.793	25.146	74.118	151.483	113.907	27.56	16.93
254.267	-97.877	115.997	16.478	-8.296	24.571	-4.033	-4.06	7.17	68.488	-3.024	14.423	88.338	24.355	25.214	42.641	-51.902	14.822	83.799	151.878	30.035	-10.191	55.178
254.4	34.5	-84.381	-2.853	15.349	65.804	67.222	-2.512	-34.504	53.629	-27.367	88.01	57.79	-115.685	10.337	21.078	-99.125	-2.871	60.782	69.951	84.267	-33.005	49.917
254.533	113.343	7.343	8.413	23.53	26.516	40.887	8.1	-26.876	57.217	8.491	109.404	-70.772	-1.255	22.354	8.553	-67.448	18.501	25.816	94.235	19.882	16.284	35.751
254.667	64.038	-14.101	61.905	10.512	-57.62	90.078	-6.163	-26.043	10.071	133.146	149.711	54.719	81.865	-10.796	-137.861	-16.651	-13.482	131.649	89.619	-103.323	-91.056	105.058
254.8	55.049	114.664	-43.306	-32.763	-24.743	202.611	21.419	35.156	29.54	-129.4	-58.101	48.06	-1.566	31.354	288.591	-1.656	-4.904	-98.482	65.504	169.275	84.055	103.26
254.933	95.753	-77.625	31.904	-48.885	-35.503	81.751	-1.944	-9.169	-3.409	12.115	64.291	-7.693	-75.163	-5.815	131.853	11.539	57.95	-9.774	62.937	-86.058	-8.627	71.581
255.067	120.24	-44.865	-11.776	-5.535	-23.136	67.493	-35.191	-3.985	-15.749	-109.448	65.721	27.268	-25.428	-24.948	24.227	-74.64	39.529	-14.309	117.363	38.827	-104.979	102.199
255.2	48.391	-16.659	-0.292	-11.947	-14.071	61.499	15.753	-43.518	22.926	-264.382	40.657	102.714	22.517	12.439	30.196	-23.397	-47.63	12.753	71.392	13.929	33.519	21.608
255.333	48.234	-32.3	12.102	23.227	-16.981	79.916	8.444	-39.572	14.493	-174.619	34.313	5.054	6.453	0.981	65.872	-9.448	18.294	5.197	34.116	29.214	5.355	42.028
255.467	74.582	7.117	2.941	74.029	7.11	75.075	-9.632	-14.276	-29.596	-159.784	76.738	86.673	-13.736	-15.673	33.424	-30.698	-29.962	14.009	58.033	21.327	-6.253	46.029
255.6	25.405	-14.945	-6.329	64.752	7.001	86.023	16.432	-47.543	-16.106	-65.744	38.022	-69.122	-47.883	-16.655	39.503	16.358	5.791	-25.05	218.628	100.73	96.598	4.144
255.733	11.972	6.363	24.157	20.022	-7.65	84.711	-3.85	7.716	51.923	-18.375	45.657	7.813	-108.327	-42.879	111.444	107.919	19.301	-32.771	118.501	13.814	61.293	31.62
255.867	22.149	6.632	0.58	12.78	32.647	121.212	-10.253	21.845	-6.268	-34.972	67.941	5.663	-233.538	-10.907	94.895	53.43	15.791	-34.015	77.225	-4.337	-10.408	17.159
256	134.578	9.414	-20.201	-111.314	103.683	94.456	-11.039	-45.811	15.841	133.984	20.202	25.63	-156.364	-8.897	-137.299	18.351	42.97	8.961	-67.24	6.503	54.522	-129.159
256.133	-97.547	-155.246	6.193	106.423	81.189	122.532	-20.592	-8.694	14.661	-163.126	83.673	-13.888	-147.454	-20.65	350.525	10.507	26.881	-110.432	131.508	6.353	11.562	230.609
256.267	7.216	139.696	4.524	-22.857	30.9	136.591	-45.892	123.661	-23.043	7.046	51.544	17.535	7.993	-13.951	140.223	23.017	15.755	-26.078	-19.941	-39.725	41.072	-13.287
256.4	9.893	33.657	9.352	6.874	96.855	94.224	-11.118	-128.447	38.208	4.483	39.727	16.004	-98.256	2.15	124.439	78.529	21.672	-40.027	19.611	16.267	11.63	-94.188
256.533	-8.69	30.74	-12.949	-19.939	34.819	110.018	-5.968	14.012	9.64	12.679	-6.517	22.078	-161.988	-66.075	174.049	52.017	-22.56	-27.586	10.353	25.056	28.034	6.788
256.667	-2.679	-79.466	1.493	-3.016	113.078	131.235	2.853	11.156	25.545	-20.309	40.303	46.229	-105.389	36.365	69.529	35.831	-15.218	-53.175	29.698	66.772	4.445	-16.947
256.8	8.68	117.558	-0.528	10.678	60.245	141.311	-24.155	5.427	13.694	7.992	5.717	27.443	-89.899	-34.054	143.773	43.223	-6.341	-64.958	-2.342	63.749	7.627	-7.869
256.933	-3.748	-58.291	-5.932	8.252	71.307	120.893	9.896	-7.413	6.399	-23.1	26.723	3.17	-145.346	-67.802	113.17	30.635	5.674	-62.842	-41.178	37.409	16.225	-8.95
257.067	-2.194	56.907	0.684	133.435	47.397	139.117	7.988	-6.886	26.212	-19.389	-23.193	3.722	-123.967	-132.159	80.586	25.702	110.555	-69.824	52.164	15.045	-63.838	11.092
257.2	-1.085	86.423	11.834	13.119	48.888	151.296	8.274	-9.84	-16.292	18.399	-3.133	-32.11	-108.054	-166.644	115.533	19.465	-49.887	-57.585	114.409	81.823	187.926	37.747
257.333	130.396	125.098	6.857	7.789	46.053	107.788	57.532	-17.779	8.616	10.693	48.572	24.37	-97.464	-49.314	106.995	-98.909	66.466	13.499	30.547	22.695	43.289	-29.647
257.467	-167.876	-19.463	-5.112	31.397	86.831	138.82	-9.629	-15.724	-7.776	23.999	15.564	-342.811	-126.702	-30.641	59.784	132.328	60.241	-361.458	77.511	-14.062	66.253	179.083
257.6	-22.185	43.976	-1.084	-22.837	92.124	94.51	-49.516	19.175	2.681	41.735	13.794	-201.939	-49.323	-70.544	139.121	-99.493	26.655	-181.999	20.114	129.177	1.993	139.196
257.733	0.798	-49.873	4.022	-32.519	83.073	97.363	-6.176	50.025	-5.113	49.007	17.747	-61.119	-7.426	-29.421	84.928	119.091	45.497	-210.871	-86.125	-115.908	16.761	92.169
257.867	-22.733	104.988	-2.634	48.255	26.799	84.973	-2.727	7.252	-22.342	38.822	34.709	-304.994	18.698	-64.659	42.29	-115.437	57.099	-45.87	146.358	26.173	27.099	76.996
258	-44.026	-61.572	6.992	33.571	73.064	56.539	9.102	-24.274	-5.125	85.166	11.641	-228.773	-3.749	-64.906	41.771	4.486	26.39	22.877	18.938	-13.24	12.8	54.06
258.133	12.041	23.598	5.51	-6.515	38.232	87.577	-25.385	-23.175	-28.529	38.655	12.99	-175.742	-38.812	-34.289	-16.142	-9.882	48.094	36.143	-32.057	-106.822	55.307	76.942
258.267	6.445	-2.925	3.403	10.229	-7.188	78.773	-7.977	17.843	-9.153	59.493	12.466	-135.606	-38.285	-18.794	57.767	11.38	92.342	58.572	-22.533	-222.935	-1.601	61.827
258.4	-10.894	-9.74	-10.381	-17.911	-22.627	96.602	-12.039	105.83	-30.155	40.521	-1.307	54.546	-22.207	-39.634	27.817	-5.731	91.266	172.241	-60.898	-147.775	20.801	33.315
258.533	9.391	-9.261	31.684	2.178	58.34	161.524	-2.412	38.736	-22.673	2.869	-12.716	-142.522	-19.462	-57.482	72.662	-7.276	33.97	62.595	-169.559	-256.597	36.444	93.037
258.667	128.774	248.868	32.197	-117.098	45.206	171.524	112.805	92.745	-24.077	260.598	8.754	142.881	11.118	30.145	32.153	-8.243	61.202	135.366	-139.63	-289.328	12.578	126.75
258.8	120.636	-192.403	69.101	109.642	53.303	150.266	-125.924	113.013	-41.165	-244.525	-2.61	-160.9	-50.824	-91.593	27.633	26.665	100.416	32.729	-233.214	-236.52	54.148	-27.099
258.933	85.546	-14.074	172.879	3.333	49.559	99.546	1.882	97.069	-30.153	72.11	8.4	59.516	-21.291	-43.559	55.298	-1.969	81.171	49.933	-298.312	-327.156	124.878	56.122
259.067	112.673	-12.133	4.589	-23.432	45.866	128.505	21.923	26.674	-20.764	44.312	-13.815	72.054	-24.684	-26.289	25.5	-9.856	58.057	9.999	-289.765	-123.284	35.668	15.557
259.2	202.667	75.477	17.597	14.256	105.519	141.899	4.763	57.363	9.131	57.959	10.945	93.015	23.11	7.173	74.481	-2.381	15.731	-3.566	-165.216	41.845	25.89	64.946
259.333	62.661	-203.091	26.615	3.447	25.715	103.618	-11.9	50.31	-19.047	26.03	23.186	18.791	27.768	-17.207	11.44	-18.087	84.253	17.959	-138.934	-145.003	47.391	74.574
259.467	85.389	14.326	-96.028	15.496	13.621	93.783	35.53	33.893	-1.646	13.383	5.41	73.061	-54.725	8.187	60.078	-8.726	74.394	-89.081	-107.978	-100.029	-20.519	81.182
259.6	25.692	-100.321	9.034	-25.864	-28.474	31.536	24.199	59.715	-62.08	7.355	17.66	39.223	-22.219	54.084	6.019	7.671	48.295	47.235	-202.548	75.853	39.424	79.631
259.733	99.61	-171.844	11.591	11.904	35.193	72.93	52.69	72.533	7.589	11.794	2.642	16.685	7.917	-20.523	25.681	-41.802	41.778	8.38	-130.318	-58.186	33.26	44.365
259.867	10	16.233	5.276	17.227	-31.801	90.608	17.195	58.547	18.616	-1.209	5.053	60.524	32.128	26.376	6.748	-48.694	56.045	23.101	-202.307	28.769	36.352	50.463
260	-259.443	-125.766	-11.587	-117.199	-8.013	80.739	15.86	68.792	34.279	6.678	27.889	143.481	133.877	18.489	-9.213	-97.394	21.874	129.966	-197.138	33.859	35.165	-4.421
260.133	-253.879	-48.041	4.723	136.281	23.964	98.488	52.738	26.654	25.939	-16.755	-20.244	16.405	-46.441	33.295	3.994	-100.858	-12.875	-137.358	-178.483	72.198	31.281	18.658
260.267	-251.725	-81.225	5.428	-14.993	31.23	99.229	63.006	14.135	-30.926	15.101	-41.178	79.095	-9.218	22.706	-21.636	-106.167	42.233	-9.445	-217.241	26.951	4.368	19.274
260.4	-121.425	-171.476	110.464	-9.437	28.466	99.239	64.589	-47.442	-21.056	12.797	-48.027	20.161	10.986	-46.478	7.45	-106.114	39.633	117.731	-255.911	119.762	30.418	32.756
260.533	-157.468	-42.429	-3.121	9.485	19.92	131.933	12.158	6.123	-14.782	-2.928	67.231	105.84	-11.215	171.101	7.302	-140.321	-15.613	-74.111	-140.644	126.412	7.718	194.289
260.667	-145.87	12.866	4.472	3.178	65.688	107.217	32.677	-16.556	-14.835	-8.086	8.876	64.243	17.165	12.772	-22.076	-107.019	27.471	49.169	-51.237	72.536	-8.531	79.343
260.8	-14.27	33.503	-5.062	11.819	48.194	48.039	3.534	57.762	26.451	-6.148	-17.669	95.255	62.567	-82.412	-97.45	-105.377	6.78	91.989	-55.845	65.351	-13	59.689
260.933	-132.751	16.498	-6.408	-1.753	17.894	48.189	8.812	10.977	-4.297	-6.797	17.084	130.278	29.576	123.012	88.372	-138.528	-54.345	117.04	-42.476	77.734	-7.113	31.557
261.067	-143.043	72.46	0.675	-4.44	54.585	65.755	3.491	3.671	21.392	1.91	-4.191	108.467	16.84	76.277	-3.559	-104.46	149.841	60.812	15.75	76.74	13.431	109.512
261.2	-165.756	71.526	-4.99	-3.463	42.339	104.531	11.668	26.226	-13.941	10.723	7.951	91.915	31.281	48.24	-23.824	-47.007	50.753	106.914	17.343	91.023	19.425	33.546
261.333	-203.784	153.501	5.074	15.706	34.13	112.559	12.183	16.458	-19.202	133.134	38.904	86.261	7.609	58.898	-12.532	-70.408	16.027	267.607	-1.049	125.562	-10.25	76.059
261.467	-235.969	47.841	-0.668	-13.797	26.028	123.274	-11.472	44.714	-56.983	-117.67	-7.176	210.642	46.949	62.776	-17.699	-85.731	17.794	-100.036	118.88	158.738	15.056	24.746
261.6	-302.187	110.84	2.211	4.541	-105.885	199.448	19.704	42.432	-62.128	-14.037	-16.72	67.161	43.318	33.134	-36.31	-92.741	19.791	25.606	-9.995	97.093	7.522	55.156
261.733	-187.722	62.492	-0.163	15.693	-337.692	47.692	29.396	41.002	-130.349	-26.698	8.685	82.562	71.201	26.214	-22.449	-27.592	22.725	79.82	44.521	36.273	-15.918	12.512
261.867	-143.503	11.673	-0.638	-9.505	-102.972	154.748	8.376	19.324	-142.001	-4.081	1.374	109.227	47.531	83.525	20.567	-33.121	-34.693	55.432	26.81	11.227	-3.229	66.741
262	-132.722	-2.674	2.411	-11.329	-37.771	168.14	27.204	13.143	-99.979	3.642	302.048	55.244	92.648	34.876	16.212	-47.384	-40.59	16.023	48.19	-9.313	-10.184	23.515
262.133	-102.953	-16.486	0.835	-6.244	7.646	154.921	-4.98	-8.151	-97.179	44.946	72.919	111.63	63.238	56.044	-31.751	-31.159	127.774	51.493	-5.447	59.002	5.025	-51.329
262.267	59.042	33.435	-0.751	-28.018	-24.86	151.489	8.88	7.756	-84.795	11.48	101.302	114.36	72.776	54.589	-19.643	9.956	-4.598	52.489	29.012	21.872	-6.117	193.384
262.4	-56.236	13.761	-0.677	-7.25	-4.753	108.091	1.377	-28.004	-106.753	41.19	36.866	108.92	70.075	109.866	-56.684	84.507	115.53	54.151	26.164	19.064	1.185	-38.695
262.533	-37.335	50.957	-1.357	13.306	-25.588	101.554	0.691	19.589	-52.78	109.579	31.295	169.499	37.986	44.676	-34.75	20.715	-54.28	90.614	21.031	36.055	-17.06	86.953
262.667	-44.221	60.4	-4.284	-13.212	21.825	173.528	17.324	39.604	-76.309	270.97	37.156	95.54	59.381	31.433	4.09	-39.025	38.984	272.325	74.441	-31.069	-20.73	148.255
262.8	10.733	150.094	-10.458	-8.631	2.644	101.733	5.575	36.468	-109.645	-154.535	18.239	55.277	49.008	43.658	8.115	-16.315	168.31	-161.29	78.161	24.718	-34.627	54.526
262.933	-19.39	25.293	-4.267	13.082	-7.679	214.609	-1.706	14.508	-78.858	61.852	72.557	101.252	6.826	32.887	-14.213	-6.54	77.027	64.763	56.902	9.77	-4.238	75.959
263.067	-128.97	54.758	-16.02	-70.267	13.943	57.678	3.398	71.731	-60.813	77.515	100.605	-80.589	51.894	69.023	-113.227	-11.31	83.312	35.28	105.838	17.562	-20.601	52.567
263.2	-40.69	15.703	-13.436	-104.616	43.221	118.539	5.514	-12.891	-33.165	25.93	19.312	93.717	21.689	29.293	-178.393	-14.192	-26.362	23.329	113.93	5.09	-13.035	38.701
263.333	-44.566	-76.615	19.941	-86.824	101.699	199.629	-3.857	18.326	-36.724	57.787	55.36	223.273	20.152	36.456	-251.258	2.585	162.6	66.721	-13.004	-23.984	5.501	22.142
263.467	-50.788	76.976	5.588	-60.51	67.118	159.115	-11.081	12.079	-28.65	-7.915	32.63	52.294	18.913	37.837	-190.63	13.65	10.251	157.672	108.585	4.311	-5.007	-6.179
263.6	21.092	21.557	5.14	-27.494	84.893	165.425	9.684	19.082	-5.638	-12.759	74.415	68.162	-9.146	103.278	-197.601	-20.43	-38.646	12.471	232.765	16.04	18.651	22.179
263.733	50.759	-27.677	10.969	-13.321	15.82	146.148	1.124	-34.99	-8.169	24.251	67.555	33.055	13.076	74.494	-192.032	-21.579	64.465	-87.028	168.325	13.066	-27.647	60.034
263.867	39.489	-61.987	-26.338	-17.683	33.993	151.151	16.374	-10.535	12.354	21.738	-44.26	29.841	23.011	78.136	-151.518	22.357	50.746	47.329	216.423	17.062	-23.673	27.206
264	134.543	58.613	1.937	-40.087	-11.172	131.706	-9.992	29.363	-72.112	134.149	90.048	-51.611	47.778	33.732	-71.111	27.651	19.184	274.328	157.867	40.492	-59.022	-5.97
264.133	48.52	-45.093	-12.97	18.02	75.043	133.798	94.803	28.838	-22.045	-139.084	75.815	49.758	-11.605	62.379	-84.697	-4.003	117.755	-172.803	136.337	29.076	-4.413	51.471
264.267	116.528	39.746	11.683	-28.021	74.62	113.333	-62.459	-2.402	-58.636	-30.009	79.399	78.837	34.42	-12.288	-22.259	56.555	-8.987	43.995	139.65	22.521	11.294	77.196
264.4	45.904	26.6	2.735	-6.889	-49.012	145.224	15.088	22.874	31.223	-5.763	97.162	135.819	60.405	13.19	-22.299	-12.894	-149.58	158.391	212.811	40.809	-11.288	62.183
264.533	-10.8	77.582	-107.618	-22.959	-335.869	99.313	-1.808	-39.185	20.157	-13.047	47.592	33.385	20.046	-21.405	-106.051	-8.425	173.431	-73.93	78.853	48.952	4.359	64.483
264.667	131.744	44.615	-15.364	-67.439	-104.211	39.612	29.602	-12.308	36.887	8.696	25.634	4.181	65.066	7.397	-71.618	-26.623	-3.514	188.846	98.467	75.296	-20.131	36.568
264.8	137.077	79.751	12.426	-27.786	-2.17	112.172	-4.662	24.665	52.467	-2.458	18.561	55.604	-23.645	8.709	-16.685	267.893	-114.045	-89.276	74.701	8.778	-6.751	36.624
264.933	138.315	161.733	13.544	-58.049	-61.465	137.062	-5.327	18.809	49.728	1.487	-0.091	61.004	99.187	-8.504	17.582	10.228	-3.984	83.226	46.586	-50.214	-23.779	25.525
265.067	109.638	28.528	108.506	-20.94	-23.528	95.767	-0.959	4.862	24.404	22.121	2.663	8.857	49.955	14.123	-20.893	16.978	-53.268	83.246	103.468	79.253	-44.429	79.219
265.2	108.027	22.692	-23.504	-7.256	8.976	106.227	112.758	-2.345	77.403	35.214	7.499	25.183	53.417	33.864	48.346	41.715	236.102	-8.727	79.275	63.942	-47.573	74.815
265.333	257.705	121.744	-23.495	-48.493	5.712	14.565	-72.353	23.118	82.37	135.342	28.022	82.467	83.158	25.09	99.257	6.626	28.503	136.405	147.112	19.04	3.29	124.631
265.467	-76.125	2.55	-24.592	18.085	123.139	-102.893	23.208	15.373	80.514	-124.929	-2.166	-72.283	66.074	90.562	91.229	-110.975	35.082	-114.181	130.21	-6.594	-42.606	98.5
265.6	71.198	135.017	29.442	-6.371	127.594	-81.922	90.503	-2.797	98.741	50.2	-11.341	28.62	75.204	73.225	82.623	-3.761	15.263	46.508	167.051	25.751	-34.997	34.939
265.733	25.889	-39.779	-42.526	-34.685	204.336	-120.723	-6.035	-29.914	81.135	-11.029	4.754	43.866	67.579	93.95	93.757	7.421	51.67	55.151	175.45	88.542	-49.323	77.762
265.867	65.31	48.44	-144.016	7.785	73.442	-79.871	13.088	-38.914	15.552	24.152	9.532	192.595	81.553	42.674	43.705	-8.918	29.632	45.771	147.24	-39.602	-45.382	107.469
266	84.702	49.006	-193.79	-6.062	51.167	-146.033	2.615	-33.187	-88.515	15.376	-5.544	-10.72	85.892	51.054	135.358	-14.923	12.696	-53.748	131.18	-98.131	-12.532	85.743
266.133	75.636	56.084	-163.254	-7.887	50.681	-199.822	3.337	-60.497	22.621	30.289	71.907	50.116	84.914	31.209	74.378	-42.408	12.892	139.104	77.935	-47.103	88.999	56.506
266.267	53.934	58.564	-126.279	6.182	58.742	-218.356	9.834	-128.565	125.399	-6.798	45.472	-15.886	127.16	57.687	72.939	156.882	-10.749	-138.728	42.507	-193.195	-59.896	134.095
266.4	67.128	28.433	-111.659	-10.488	35.828	-292.691	-13.379	-100.702	13.48	-8.805	25.759	0.927	81.115	18.19	39.284	-136.927	-102.977	17.97	72.791	-299.821	-66.316	82.985
[truncated: 1,677 more rows]
