# Supplementary figures and images for: Precise optical control of gene expression in C elegans using improved genetic code expansion and Cre recombinase
Source: eLife journal article supplement (doi:10.7554/elife.67075), 2021-08-05

Figure 2 - figure supplement 1

**A**

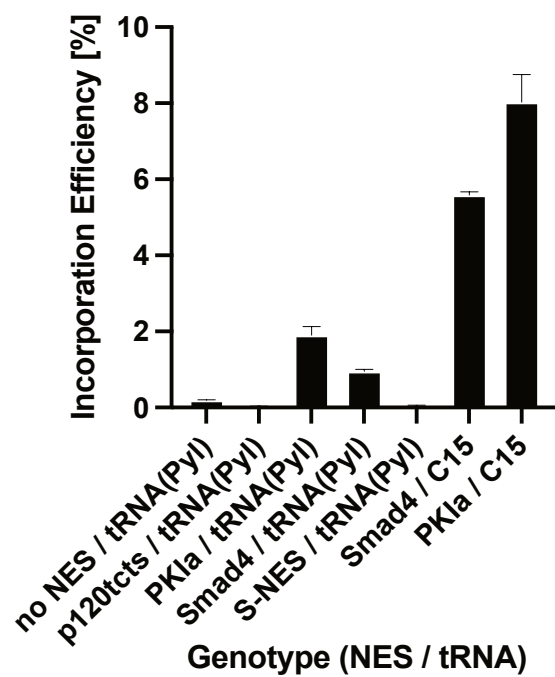

**B**

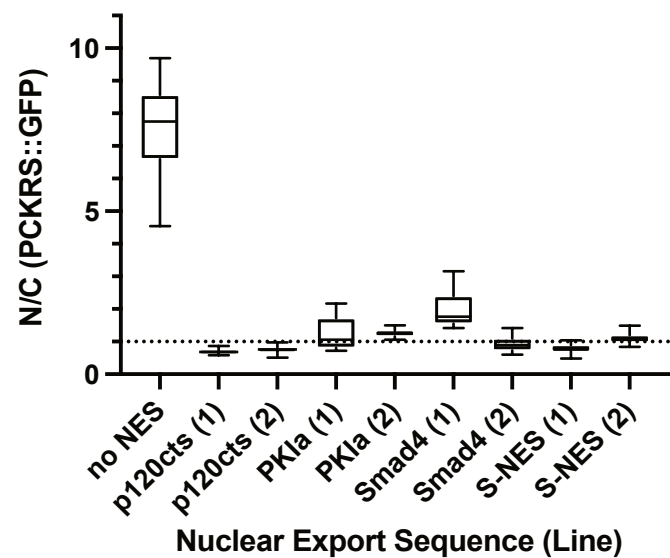

**C**

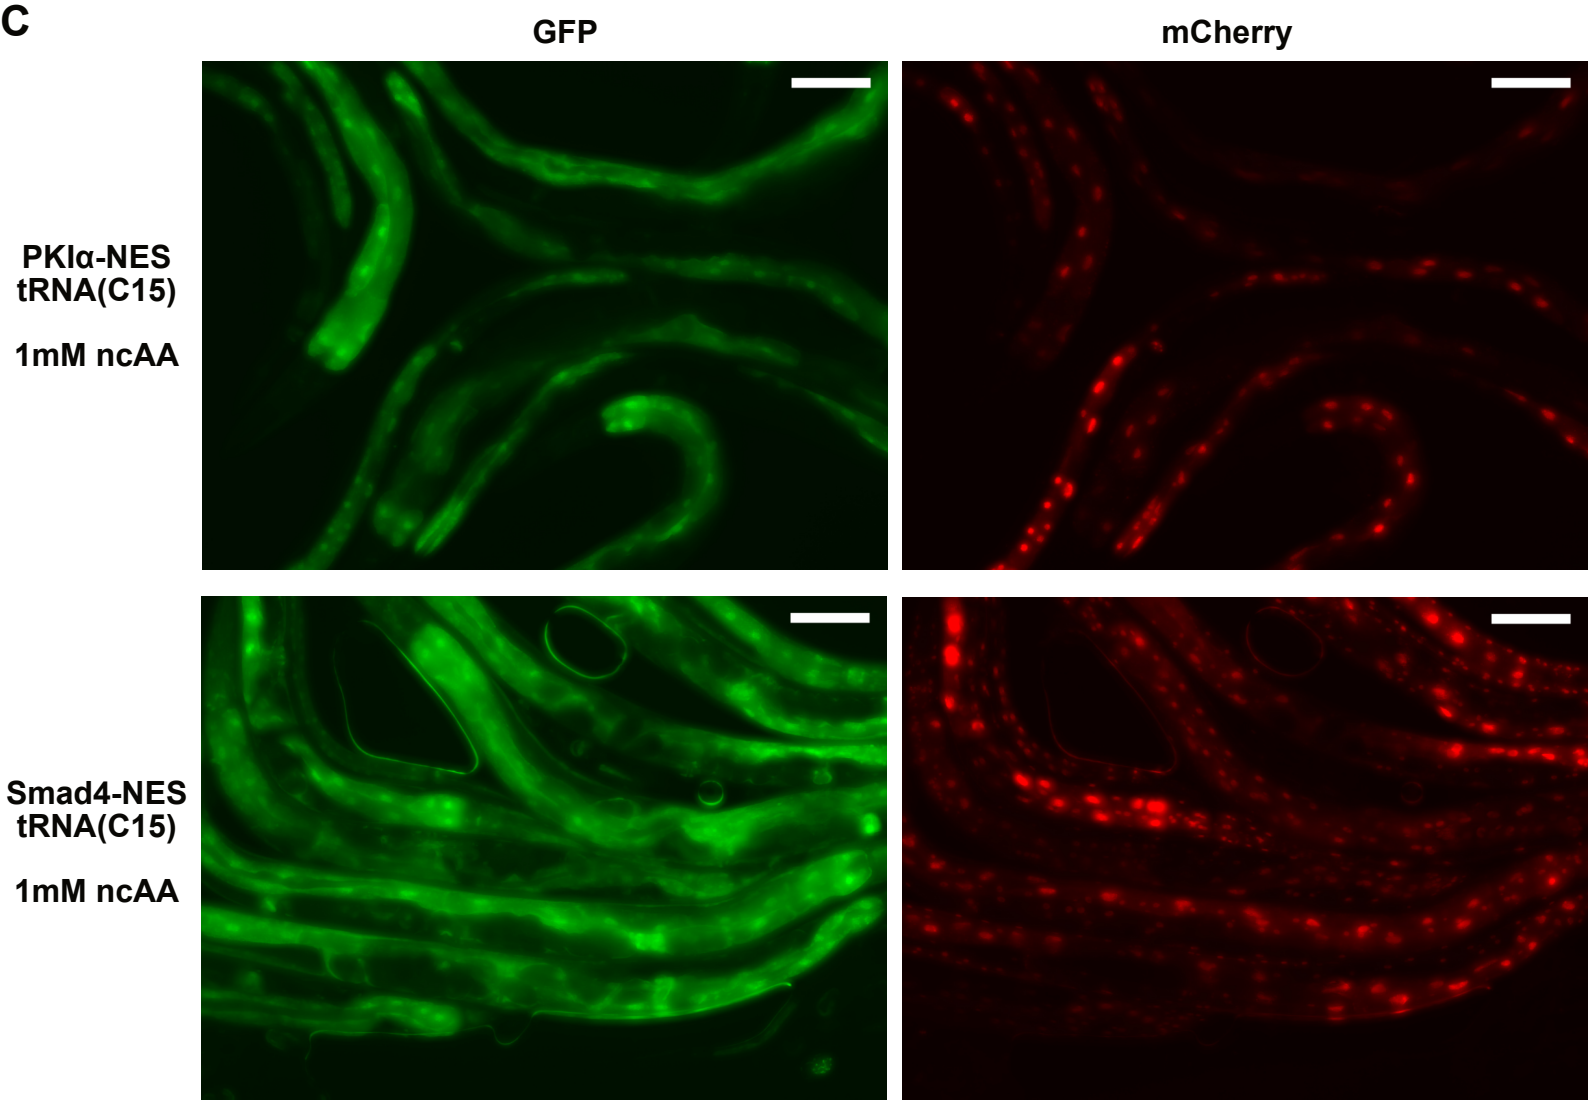

Supplement: supp [file elife_poa_e67075_Figure_2_figure_supplement_1.pdf › elife_poa_e67075_Figure_2_figure_supplement_1.pdf]

Figure 3 - figure supplement 1

A

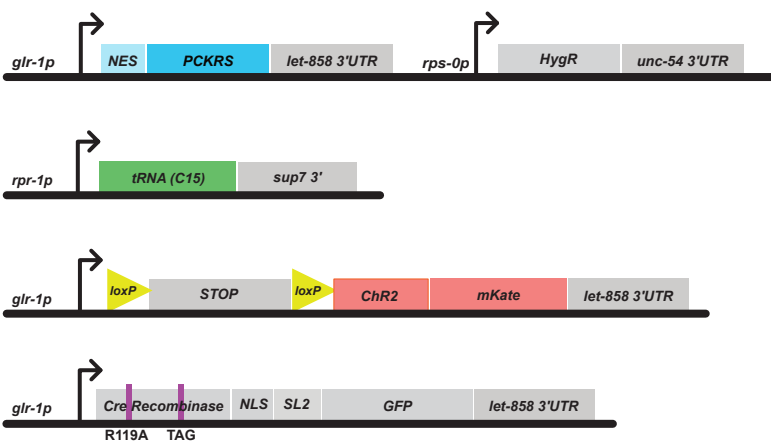

C

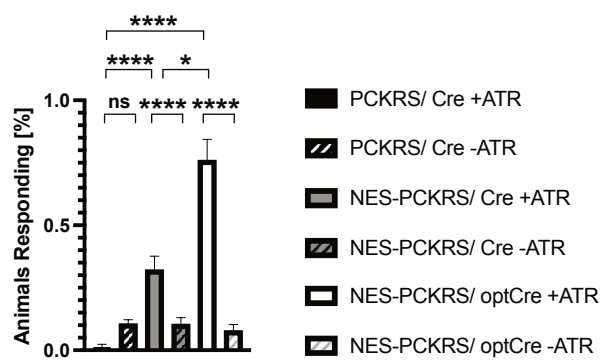

B

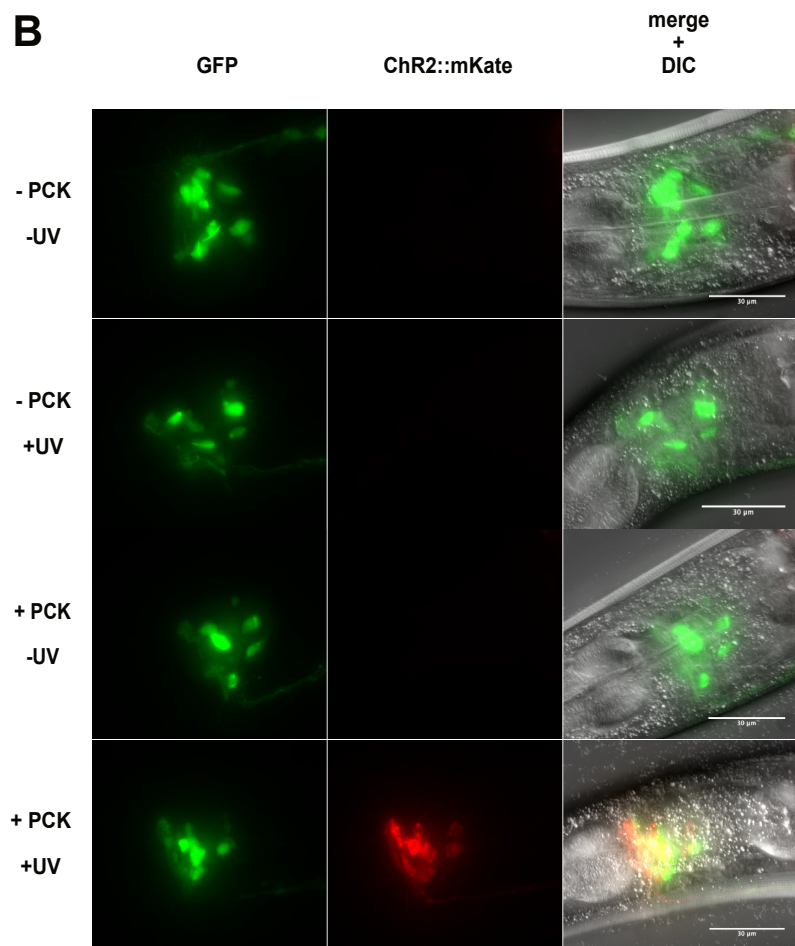

Supplement: supp [file elife_poa_e67075_Figure_3_figure_supplement_1.pdf › elife_poa_e67075_Figure_3_figure_supplement_1.pdf]

Figure 4 - figure supplement 1

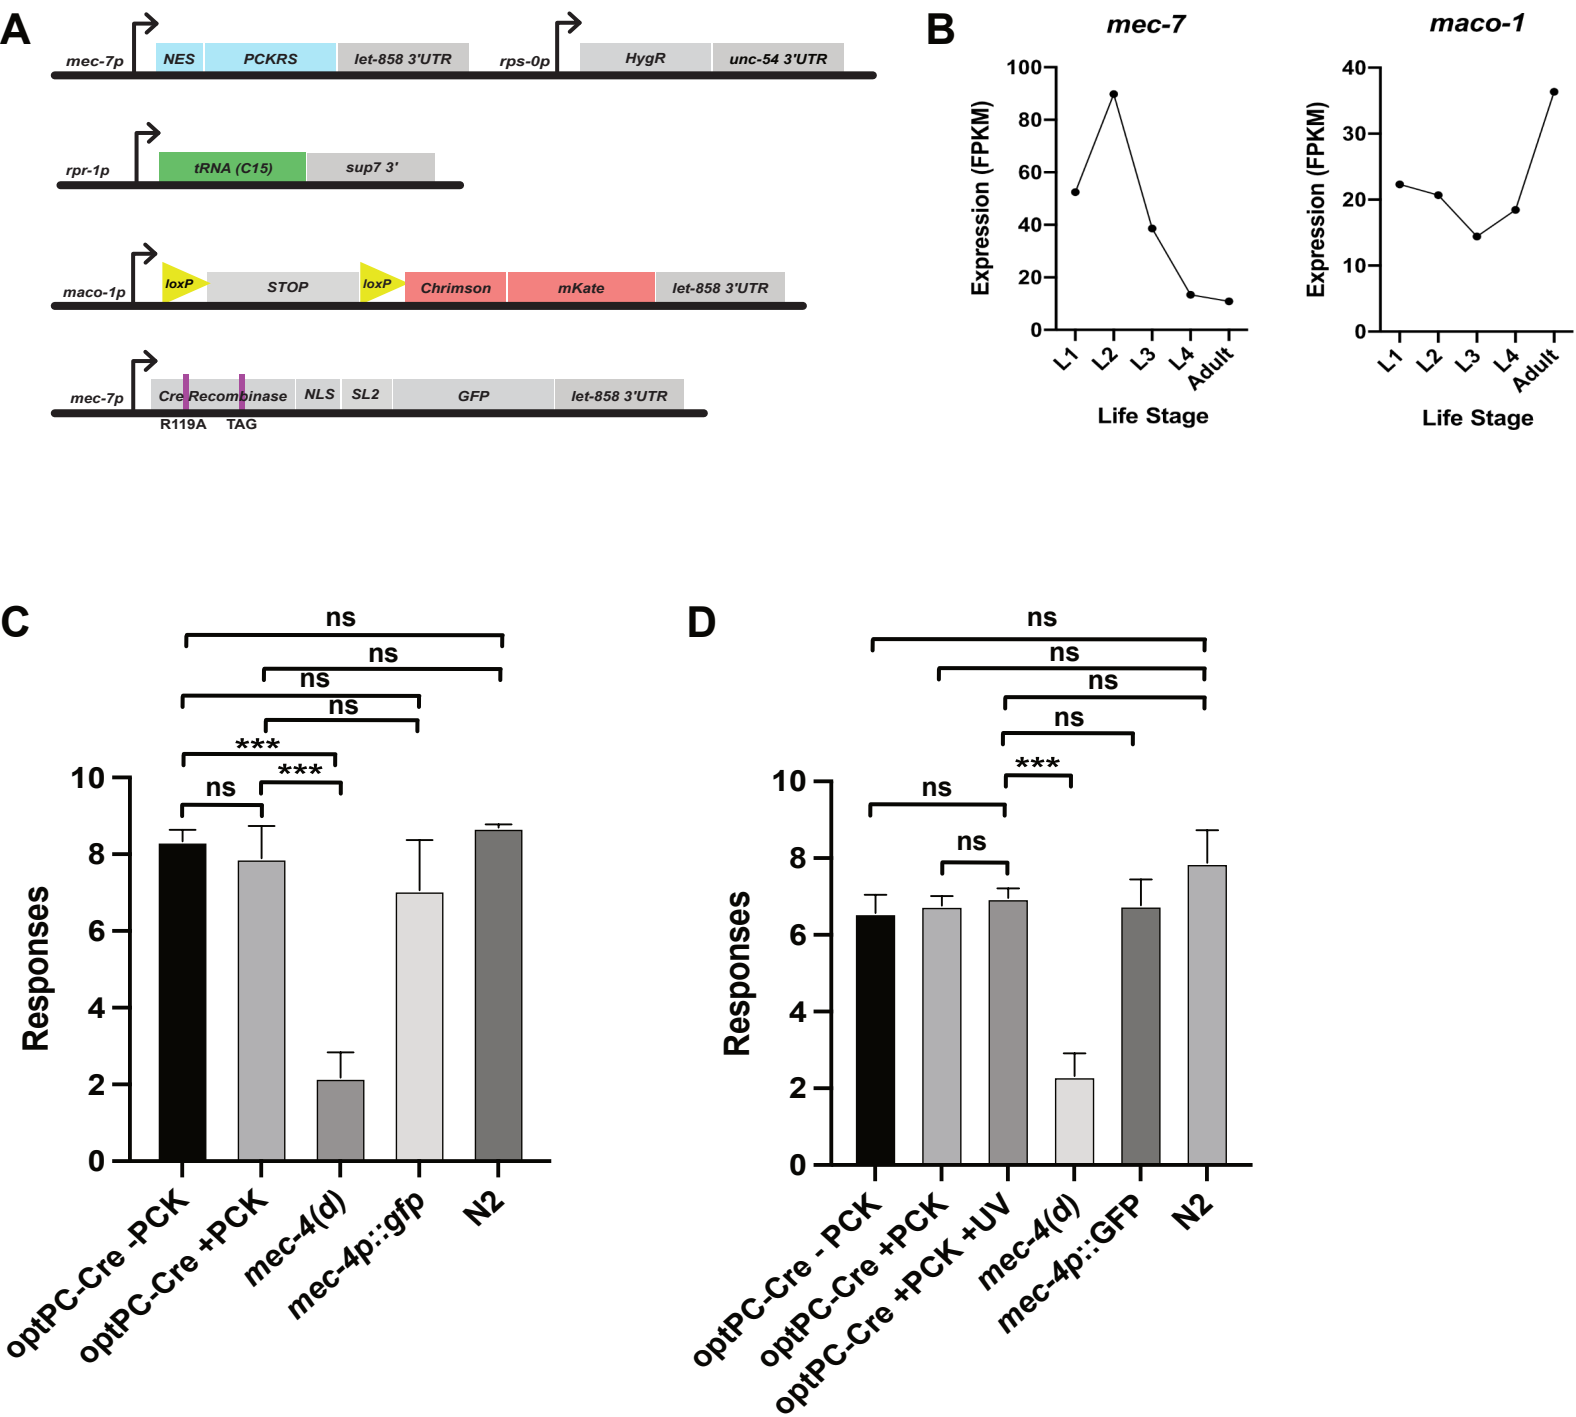

Supplement: supp [file elife_poa_e67075_Figure_4_figure_supplement_1.pdf › elife_poa_e67075_Figure_4_figure_supplement_1.pdf]

Figure 5 - figure supplement 1

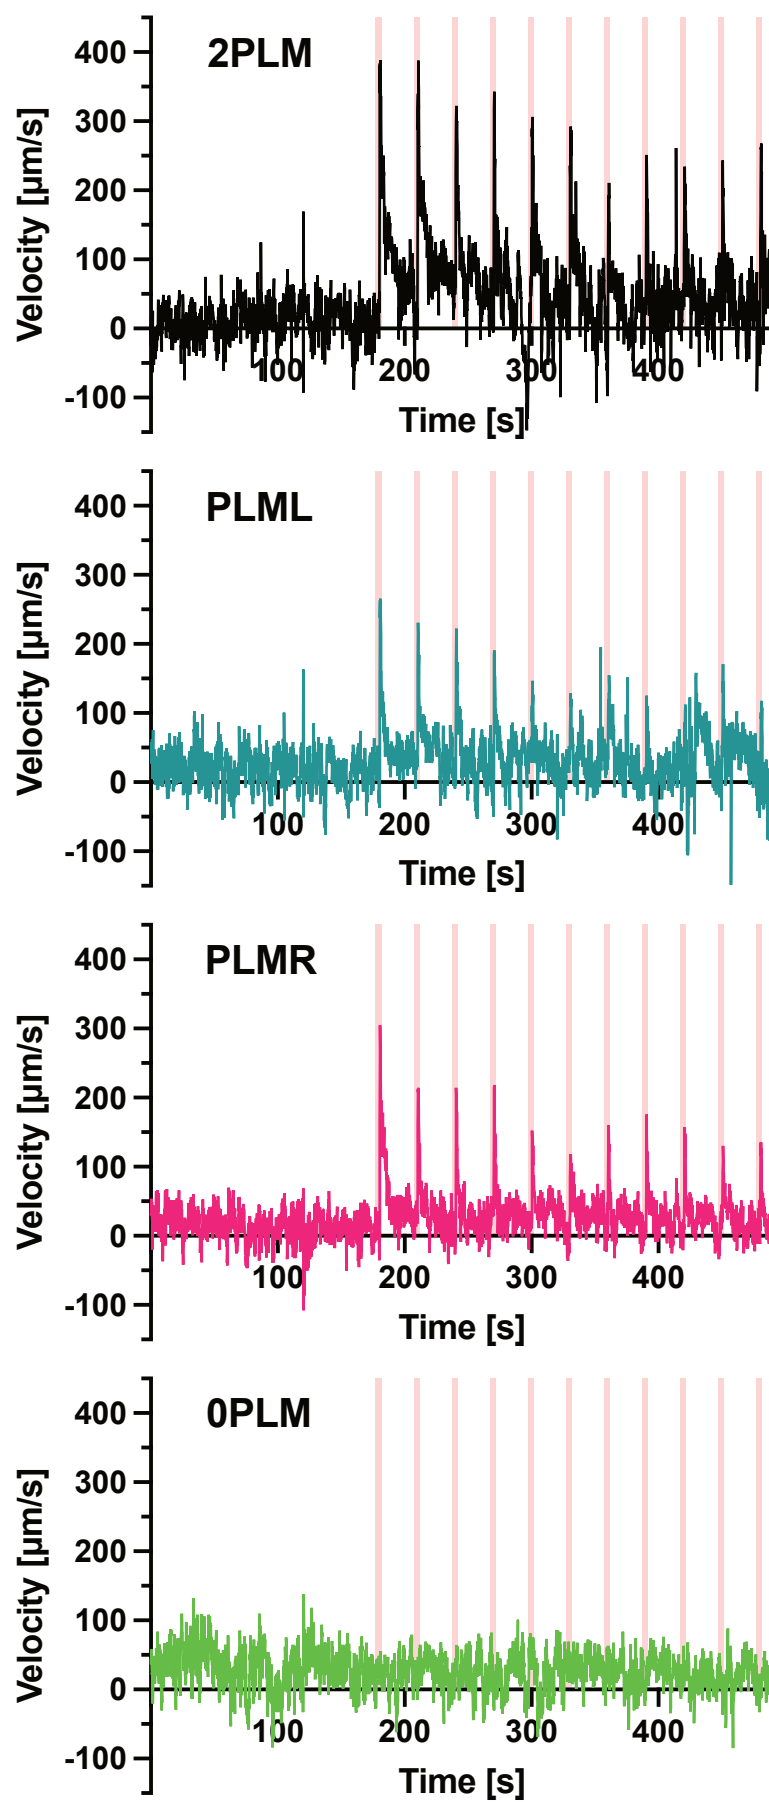

Supplement: supp [file elife_poa_e67075_Figure_5_figure_supplement_1.pdf › elife_poa_e67075_Figure_5_figure_supplement_1.pdf]

Figure 5 - figure supplement 2

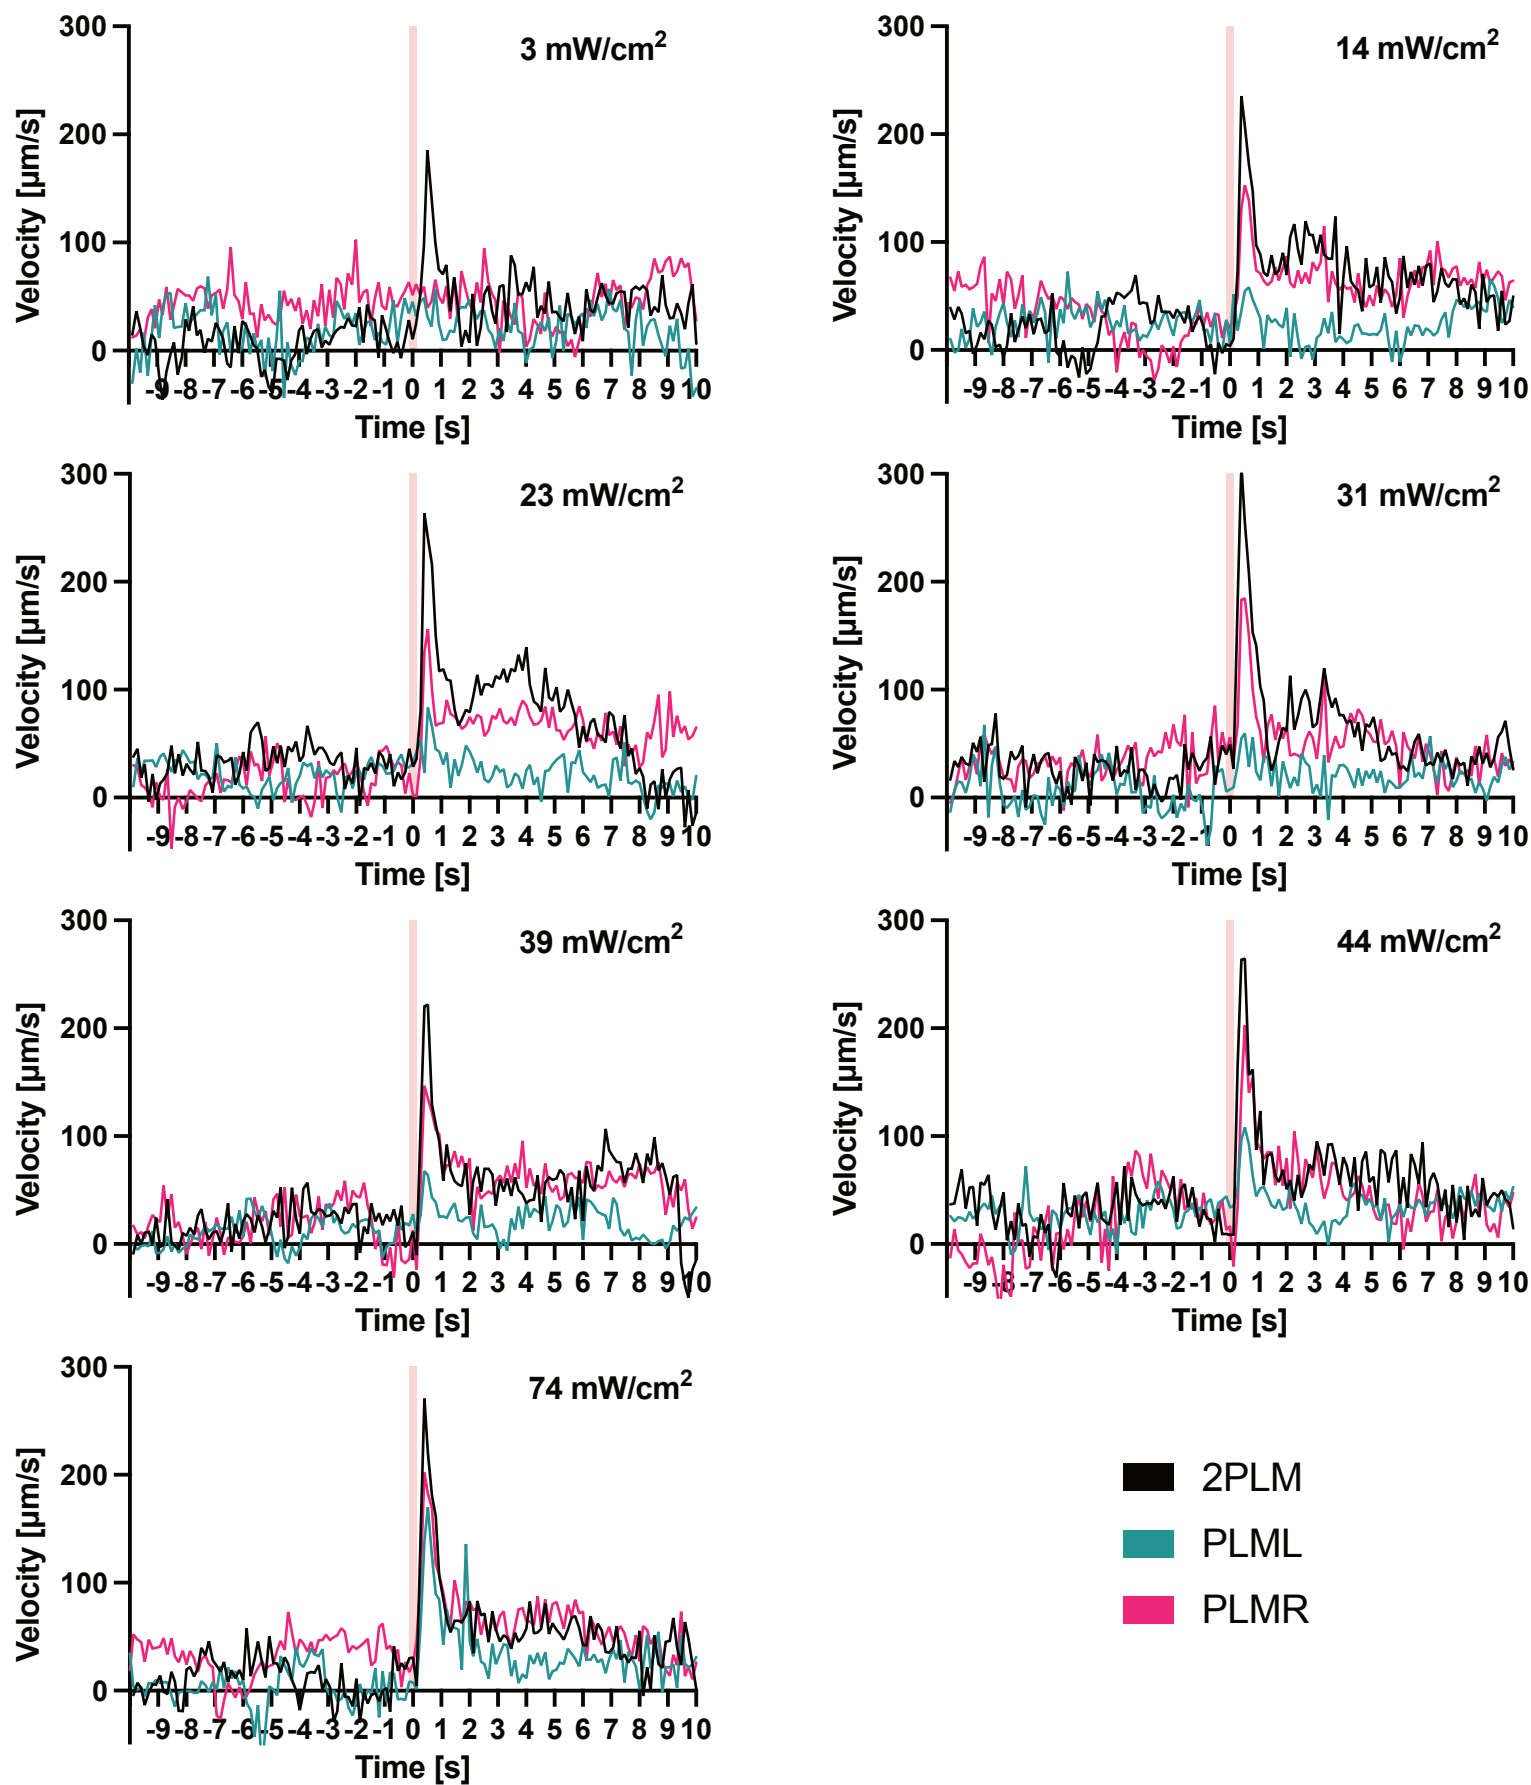

Supplement: supp [file elife_poa_e67075_Figure_5_figure_supplement_2.pdf › elife_poa_e67075_Figure_5_figure_supplement_2.pdf]

Figure 5 - figure supplement 3

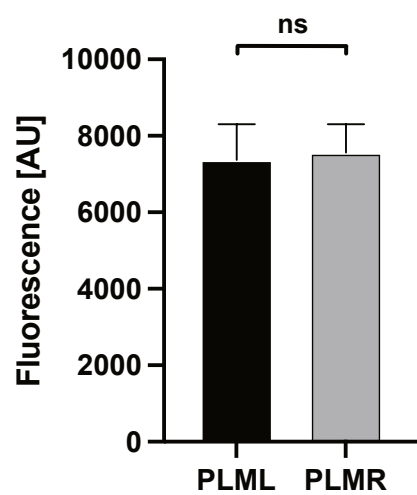

Supplement: supp [file elife_poa_e67075_Figure_5_figure_supplement_3.pdf › elife_poa_e67075_Figure_5_figure_supplement_3.pdf]
